# Supplementary material for: One Step Closer to the Understanding of the Relationship IDR-LCR-Structure
Source: Genes (Basel). 2023 Aug 28;14(9):1711. doi: 10.3390/genes14091711 (PMC10531472; doi:10.3390/genes14091711)
Supplement: Supplementary file 1 [file genes-14-01711-s001.zip]

Archive with 7 entries (7 files):
- SupplTable_S1.xlsx
- SupplTable_S2.xlsx
- SupplTable_S3.xlsx
- SupplTable_S4.xlsx
- SupplTable_S5.xlsx
- SupplTable_S6.xlsx
- supp_materials.pdf
