# Supplementary material for: One Step Closer to the Understanding of the Relationship IDR-LCR-Structure
Source: Genes (Basel). 2023 Aug 28;14(9):1711. doi: 10.3390/genes14091711 (PMC10531472; doi:10.3390/genes14091711)
Supplement: Supplementary file 1 [file genes-14-01711-s001.zip › SupplTable_S1.xlsx]

## Sheet: SupplTable_S1
seq name	poly name	poly size	poly seq start	poly seq end	amino acids type	idr name	idr size	idr start	idr end	idr mean hydrophobicity	idr mean ncpr	poly aa	poly ss	poly plddt	poly median plddt	idr aa	idr ss	idr plddt	idr median plddt	poly seq left	poly seq right	poly ss left	poly ss right
A0A096LP55	A0A096LP55_p_1_1	9	17	25	E	A0A096LP55_1	30	1	30	0.556	0.556	EEEEEEEEE	HHHHHHHHH	69.19,67.36,63.94,66.89,65.6,68.32,65.93,67.74,73.38	67.36	MGLEDEQKMLTESGDPEEEEEEEEELVDPL	HHHHHHHHTTS HHHHHHHHHH HH	47.38,51.85,67.11,67.85,65.9,62.0,61.1,61.13,58.22,58.93,58.33,58.6,57.26,58.16,58.98,68.19,69.19,67.36,63.94,66.89,65.6,68.32,65.93,67.74,73.38,81.23,85.06,90.46,93.05,94.72	65.915	||||||||||||||||||||||||||||||MGLEDEQKMLTESGDPEEEE	EEEEELVDPLTTVREQCEQLEKCVKARERLELYDEHVSSRSHTEEDCTEE	|||||||||||||||||||||||||||||| HHHHHHHHTTS HHHHH	HHHHH HHHHHHHHHHTSHHHHHHHHHHHHHHHHHHT SS SHHH
A0A0B4J2E5	A0A0B4J2E5_p_1_1	8	240	247	E	A0A0B4J2E5_1	30	238	267	0.306	0.306	EEEEEEEE	TT S	47.49,43.17,38.15,33.84,32.9,31.99,33.25,27.85	33.545	QREEEEEEEEDQEGDRETTIRGKATPAEEE	HTTT S EEEE SS HHH	47.59,49.19,47.49,43.17,38.15,33.84,32.9,31.99,33.25,27.85,27.68,29.52,28.75,28.58,36.01,44.45,59.09,70.99,74.29,75.51,70.79,65.77,66.02,60.94,65.88,63.92,64.1,64.31,59.69,64.98	48.39	CFFESNSLDLYSLSQDGVLCMWQCDTPPEGLRLKPPAGWKADLLQREEEE	EEEEDQEGDRETTIRGKATPAEEEKTGKVKYSRLAKYFFNKEGDFNNLTA	EEE TTSS EEEEETTTEEEEEEESS GGG B TTHHHHHHHTTT	S EEEE SS HHHHTTS EEEEEEEESS TT EEE
A0A0G2JN68	A0A0G2JN68_p_1_1	7	219	225	S	A0A0G2JN68_1	21	213	233	0.709	0.709	SSSSSSS		44.27,43.75,35.89,36.34,31.61,36.04,32.72	36.04	VSVTGNSSSSSSSPTEPSSKT	EEEE GGG	95.39,94.74,92.6,91.38,81.3,64.39,44.27,43.75,35.89,36.34,31.61,36.04,32.72,47.95,43.01,47.65,50.97,45.13,44.59,52.47,54.67	47.65	VNGTFQADFPLGPATHGGTYTCFGSLHDSPYEWSDPSDPLLVSVTGNSSS	SSSSPTEPSSKTGIRRHLHILIGTSVAIILFIILFFFLLHCCCSNKKNAA	TTS EEEEEEEEE S EEEEEEEE SS TTBB EEEEEE	GGGHHHHHHHHHHHHHHHHHHHHHHHHHHHHHHHHHHHHGG
A0A0G2JPC4	A0A0G2JPC4_p_1_1	7	219	225	S	A0A0G2JPC4_1	21	213	233	0.709	0.709	SSSSSSS		43.75,43.88,37.69,36.97,33.13,36.83,33.41	36.97	VSVTGNSSSSSSSPTEPSSKT	EEEE THH	95.51,94.89,92.81,91.51,81.12,64.37,43.75,43.88,37.69,36.97,33.13,36.83,33.41,49.11,43.32,47.82,51.83,45.61,48.52,53.16,55.53	48.52	VNGTFQADFPLGPATHGGTYTCFGSLHDSPYEWSDPSDPLLVSVTGNSSS	SSSSPTEPSSKTGIRRHLHILIGTSVAIILFIILFFFLLHCCCSNKKNAA	TTS EEEEEEEEE S EEEEEEEE TT TTBB EEEEEE	THHHHHHHHHHHHHHHHHHHHHHHHHHHHHHHHHHHHHHGG
A0A0J9YX57	A0A0J9YX57_p_1_1	6	40	45	S	A0A0J9YX57_1	185	1	185	0.618	0.618	SSSSSS	SHHHHH	45.18,50.05,53.52,54.09,54.65,59.13	53.805	MPRGQKSKLRARGKRRETHDQPQGLTGPQATAEKQEESRSSSSSSAVCQGARRRSSGSSVPQESQGASPTGYPDAGASCSKYDVAAMGQDEKSPSTSRDASVSQESQGASPIGPPDAGISCSKSDEAAKGQNEKSPSTSRDASVPQESQGASPTGSPDADVSGSKSDVAAKGQDEESLSSSKRAA	SSHHHHHHHHHHHHTTTT HHHHHHHHHHH	40.72,65.12,49.28,53.95,55.65,55.84,60.54,62.46,58.09,56.25,56.02,58.77,51.51,56.8,54.06,49.89,52.01,50.52,49.71,44.29,45.95,50.08,45.97,40.46,50.31,46.77,43.05,44.35,41.4,39.28,42.42,39.05,44.35,44.14,38.98,39.26,33.69,36.57,47.13,45.18,50.05,53.52,54.09,54.65,59.13,69.35,72.12,70.45,61.54,57.49,51.62,52.31,50.69,49.83,47.33,46.44,34.74,40.66,39.06,44.65,39.32,34.08,39.91,45.56,37.45,37.58,38.42…	44.64	||||||||MPRGQKSKLRARGKRRETHDQPQGLTGPQATAEKQEESRSSS	SSSAVCQGARRRSSGSSVPQESQGASPTGYPDAGASCSKYDVAAMGQDEK	|||||||| SSHH	HHHHHHHHHHTTTT
A0A0U1RQG5	A0A0U1RQG5_p_1_1	11	93	103	E	A0A0U1RQG5_2	20	88	107	0.102	0.102	EEEEEEEEEEE	HHHHHHHHHHH	68.1,66.08,66.62,67.15,67.22,66.73,66.75,67.08,67.21,63.41,59.25	66.75	EEEEDEEEEEEEEEEERNEA	HHHHHHHHHHHHHHHHHHHH	73.15,69.02,66.61,69.65,75.05,68.1,66.08,66.62,67.15,67.22,66.73,66.75,67.08,67.21,63.41,59.25,61.48,62.81,57.72,57.76	66.74	AGPMRGLGEEEGEQAAGLAAAPGGGNAEEDSEIRIVVEMVEEEEDEEEEE	EEEEEERNEADNFDLVAAARRYPIRGFRMEFLDMVHSLLLRIYHNDHILI	TTTHHHHHHHHHHHHHHHHHHHHH	HHHHHHHHHHHHHHHHHHHTT THHHHHHHHHHHHHHHHHHHHH
A0A1B0GTH6	A0A1B0GTH6_p_1_1	10	636	645	S	A0A1B0GTH6_1	47	608	654	0.827	0.827	SSSSSSSSSS		43.67,46.99,43.85,42.29,44.17,44.73,44.72,44.07,43.64,41.19	43.96	SLLPSTSSSTSSSSTTSSSSSVASASSDSSSSSSSSSSFSISSSSSP		33.77,33.82,37.26,39.56,40.6,36.13,39.22,39.56,40.71,40.53,42.02,44.16,47.07,46.43,49.94,49.32,51.06,49.66,49.59,52.12,47.41,58.57,48.22,52.22,50.93,46.33,49.21,53.18,43.67,46.99,43.85,42.29,44.17,44.73,44.72,44.07,43.64,41.19,43.44,34.83,41.11,34.64,31.68,37.77,36.08,34.11,39.2	43.67	QAIDWLFYVKKNNSQPQSLLPSTSSSTSSSSTTSSSSSVASASSDSSSSS	SSSSSFSISSSSSPSKEFMTLTLSRPVFRKVLSYHRLPAGVSWLEFIYSK		TT TT HHHHHH T
A0A1B0GTI1	A0A1B0GTI1_p_1_1	7	119	125	Q	A0A1B0GTI1_2	68	92	159	0.531	0.531	QQQQQQQ	HHHHHHH	84.51,85.21,84.99,83.38,81.08,77.49,75.49	83.38	KESSLDLSAPGEEPPTSASLTQRQRQRQQQQQQQESLRAKSWAQNPGLPGILNTTGRKRRDPKKRAAA	HHHHHHHHHHHHHHHHHHHHHHHT TTS GGG HHHHHHH	57.32,49.05,50.63,46.49,44.48,41.01,51.76,40.88,45.36,46.55,43.88,43.64,50.68,54.03,52.69,52.3,50.62,56.57,58.25,58.68,64.27,76.21,78.82,81.5,80.87,85.01,84.58,84.51,85.21,84.99,83.38,81.08,77.49,75.49,73.33,67.25,64.95,64.34,60.68,61.86,62.62,54.49,58.66,64.57,62.56,64.58,67.82,74.0,79.63,78.91,73.04,73.6,67.16,70.23,67.91,65.24,73.52,79.43,80.3,82.61,90.0,92.7,94.26,93.8,93.58,95.97,97.0,96.45	67.535	AGVSPPATVRKRRLSTLWASKESSLDLSAPGEEPPTSASLTQRQRQRQQQ	QQQQESLRAKSWAQNPGLPGILNTTGRKRRDPKKRAAAMERVRQWEIYVL	S HHHHHHHHHHHHH	HHHHHHHHHHT TTS GGG HHHHHHHHHHHHHHHHHHH
A0A1W2PR80	A0A1W2PR80_p_1_1	6	367	372	A	A0A1W2PR80_3	118	303	420	0.731	0.731	AAAAAA		36.62,43.02,40.24,46.35,45.25,43.88	43.45	AEVPSTAPVSGKKHRPPGPLFSSSDTLPATSSHSRDSAQVTSMIPAPFTAASRDAGMRRTRSAPAAAAAAPPPSTLNPTSGSLLQWMEAPHISWPQPQLQHVPRGQNQRSQTSRTRSC		42.73,36.69,37.98,44.8,39.55,44.96,44.67,46.55,46.48,53.93,42.86,43.62,41.83,52.33,59.84,57.96,63.65,48.44,41.69,52.5,35.48,44.58,40.02,44.32,43.75,45.11,45.67,49.77,39.76,50.51,44.77,44.53,42.42,44.56,49.06,37.51,40.99,38.55,44.85,37.51,50.02,39.35,46.22,47.97,39.85,51.3,40.14,45.23,45.03,37.3,42.94,47.55,53.42,44.57,46.37,42.86,47.19,46.38,45.16,40.91,47.54,45.38,40.06,44.05,36.62,43.02,40.24,4…	45.755	GPLFSSSDTLPATSSHSRDSAQVTSMIPAPFTAASRDAGMRRTRSAPAAA	AAAPPPSTLNPTSGSLLQWMEAPHISWPQPQLQHVPRGQNQRSQTSRTRS
A0A1W2PR82	A0A1W2PR82_p_1_1	14	34	47	E	A0A1W2PR82_1	70	19	88	0.573	0.573	EEEEEEEEEEEEEE		51.77,43.73,43.51,48.79,43.63,45.37,38.39,46.98,37.36,44.21,36.11,41.55,40.86,37.01	43.57	HHPFLPSDPEPPETSEEEEEEEEEEEEEEGEGEGLGGCGRILPSSGRAEATEEAAPEGPGSPETPLQLLR	TT THHHHHHHH	48.26,52.19,54.43,46.27,55.17,46.71,41.03,47.12,46.79,42.7,46.2,46.22,43.77,47.2,47.51,51.77,43.73,43.51,48.79,43.63,45.37,38.39,46.98,37.36,44.21,36.11,41.55,40.86,37.01,37.16,37.33,40.3,34.9,36.58,37.68,32.78,33.4,35.25,38.67,33.58,38.66,41.22,37.04,40.27,36.55,33.8,40.83,35.33,35.79,30.54,40.19,45.02,44.0,50.55,45.67,52.62,53.75,53.16,58.0,58.32,57.89,71.69,79.35,85.33,90.28,92.61,93.63,95.47,…	44.105	||||||||||MAAGVIRPLCDFQLPLLRHHPFLPSDPEPPETSEEEEEEE	EEEEEEEGEGEGLGGCGRILPSSGRAEATEEAAPEGPGSPETPLQLLRFS	||||||||||	TT THHHHHHHHHH
A0A1W2PRP0	A0A1W2PRP0_p_1_1	7	126	132	R	A0A1W2PRP0_1	74	125	198	0.528	0.528	RRRRRRR	B	72.95,66.4,65.86,65.69,63.41,62.78,61.83	65.69	YRRRRRRRGPKREGPRGPRAGGAQGPSGPSEPPAAQGRLAPDSAGEGAPGREPPASPAPPGKEHPRDLKFSIDY	B TT TTSHHH	72.73,72.95,66.4,65.86,65.69,63.41,62.78,61.83,60.29,63.69,57.06,53.27,60.5,55.39,52.91,54.21,52.92,47.04,50.68,49.12,44.17,42.83,47.46,47.68,45.75,49.03,46.19,47.41,48.08,49.98,51.65,54.34,54.27,47.8,51.3,50.1,46.9,53.47,48.84,54.62,56.97,47.91,51.44,49.25,48.79,48.15,48.0,60.28,52.99,49.12,53.49,52.27,57.54,61.74,53.22,55.66,64.14,56.23,63.16,54.56,47.12,54.38,60.45,58.88,61.32,60.87,67.01,79.0…	54.305	SIRHNLSLNSCFVKVPRSEGHEKGKGNYWTFAGGCESLLDLFENGNYRRR	RRRRGPKREGPRGPRAGGAQGPSGPSEPPAAQGRLAPDSAGEGAPGREPP	HHHHHHHH TTEEEE TTT SS EEEE TTTHHHHHTTTTT B
A0A2R8Y4L2	A0A2R8Y4L2_p_1_1	6	263	268	S	A0A2R8Y4L2_2	55	221	275	0.586	0.586	SSSSSS		44.45,45.32,47.22,49.91,48.78,41.78	46.27	YNNQSSNFGPMKGGNFEGRSSGPHGGGGQYFAKPRNQGGYGGSSSSSSYGSGRRF		36.13,38.96,39.16,37.1,39.96,36.06,38.62,35.89,37.65,48.79,36.92,43.45,39.56,42.26,38.83,41.04,38.26,40.8,38.77,40.55,46.96,44.15,51.08,45.55,40.8,39.57,40.02,39.41,46.05,42.76,43.92,46.32,44.16,53.92,36.8,45.85,38.59,38.39,40.06,38.96,38.3,43.52,44.45,45.32,47.22,49.91,48.78,41.78,50.53,48.4,50.89,46.55,63.23,57.26,63.98	41.78	NDFGNYNNQSSNFGPMKGGNFEGRSSGPHGGGGQYFAKPRNQGGYGGSSS	SSSYGSGRRF||||||||||||||||||||||||||||||||||||||||	S	||||||||||||||||||||||||||||||||||||||||
A0A2Z4LIS9	A0A2Z4LIS9_p_1_1	7	43	49	A	A0A2Z4LIS9_2	196	44	239	0.758	0.758	AAAAAAA		41.15,47.22,44.5,43.14,48.88,49.98,53.66	47.22	AAAAAAPGSRSLRGVHVPPPLHPAPAREESARTPAAAGRAAKMAEAPASPAPLSPLEVELDPEFEPQSRPRSCTWPLQRPELQASPAKPSGETAADSMIPEEEDDEDDEDGGGRAGSAMAIGGGGGSRTLVSGLLLEDSVRVLAPGGQDPGSGPATAAGGLSGGTQALLQPQQPLPPPQPGAAGGSGQPRKCSSRR	TT TT TTSSS GGGG S SS	47.22,44.5,43.14,48.88,49.98,53.66,54.48,54.29,57.51,58.43,52.63,59.35,56.81,54.58,60.87,65.99,67.81,75.84,77.69,72.18,71.34,67.53,69.88,60.1,54.81,52.72,53.44,49.21,51.36,53.03,53.2,53.07,60.14,65.35,43.68,47.81,47.52,47.11,49.22,38.99,46.82,44.8,49.52,42.54,34.83,45.72,47.08,49.57,44.26,55.96,52.32,50.87,48.13,50.5,49.98,50.35,48.77,58.38,54.87,64.54,68.89,70.42,64.96,59.17,68.58,67.32,63.45,63…	50	|||||METDLAEMPEKGVLSSQDSPHFQEKSTEEGEVAALRLTARSQAAA	AAAAPGSRSLRGVHVPPPLHPAPAREESARTPAAAGRAAKMAEAPASPAP	||||| S
A0A3B3IU63	A0A3B3IU63_p_1_1	9	114	122	E	A0A3B3IU63_1	28	101	128	0.362	0.362	EEEEEEEEE	SSHHHHH	50.64,52.56,54.67,54.15,52.96,53.37,57.6,58.38,58.71	54.15	DDTHSQVEEMPQSEEEEEEEEEKEEEMV	SSHHHHHHHHHHH	51.32,52.22,53.85,49.45,47.51,46.7,58.21,54.08,55.26,49.09,50.4,53.39,46.62,50.64,52.56,54.67,54.15,52.96,53.37,57.6,58.38,58.71,61.76,65.09,62.44,61.45,62.11,67.81	53.965	KEVKNSCRLCITPEHVKRALQKDEQLRWILELEDDTHSQVEEMPQSEEEE	EEEEEKEEEMVVLVVMGGRRRRRRRRRRKDS|||||||||||||||||||	HHHHHTT SS HHHHHHHHHH HHHHHHHHTT SS	HHHHHHHHHHHHHHHTT |||||||||||||||||||
A0A7I2V3R4	A0A7I2V3R4_p_2_1	6	195	200	P	A0A7I2V3R4_2	55	159	213	0.693	0.693	PPPPPP		63.08,62.78,60.08,60.82,64.43,43.74	61.8	LPQDRLPPLPARLPAPAAAPPPTPAPPPPPSPAPPQPPPPPPAEDAAPGPRARPG		54.32,52.67,59.73,57.58,53.62,52.73,51.47,50.19,53.33,48.9,46.11,47.59,49.11,44.06,50.56,51.42,50.6,46.24,52.83,61.38,61.0,56.51,63.03,59.67,61.72,66.11,65.54,64.0,66.38,58.33,56.03,60.91,58.4,55.89,54.82,56.12,63.08,62.78,60.08,60.82,64.43,43.74,40.43,49.35,37.91,43.83,42.49,45.37,42.08,44.85,41.83,38.23,38.05,39.49,41.67	52.83	FPLALRAAHDPLPQDRLPPLPARLPAPAAAPPPTPAPPPPPSPAPPQPPP	PPPAEDAAPGPRARPGLRAPGAYDSCQNCKRAALTAGCVCVVFSFLSMVV	HHHHHHHH	HHHHHHHHHHHHHHHHHHHHHHHH
A0JLT2	A0JLT2_p_1_1	8	28	35	P	A0JLT2_1	56	1	56	0.789	0.789	PPPPPPPP		70.74,74.96,77.3,78.25,78.5,78.05,75.44,74.07	76.37	MENFTALFGAQADPPPPPTALGFGPGKPPPPPPPPAGGGPGTAPPPTAATAPPGAD	S	45.62,57.88,51.65,61.3,50.6,55.23,61.2,50.31,49.63,54.44,45.74,54.54,54.3,74.82,72.9,72.54,73.51,68.48,57.93,47.37,51.75,45.04,52.63,58.21,62.47,52.11,58.63,70.74,74.96,77.3,78.25,78.5,78.05,75.44,74.07,61.0,45.47,39.74,43.43,47.74,44.64,49.6,47.71,59.47,56.47,49.36,48.8,40.85,48.23,42.39,41.95,56.92,39.71,37.15,44.97,44.62	53.465	|||||||||||||||||||MENFTALFGAQADPPPPPTALGFGPGKPPPP	PPPPAGGGPGTAPPPTAATAPPGADKSGAGCGPFYLMRELPGSTELTGST	|||||||||||||||||||	S SSGGGS SS TTS
A0JLT2	A0JLT2_p_2_1	7	199	205	K	A0JLT2_2	74	171	244	0.279	0.279	KKKKKKK		48.27,53.08,49.47,49.65,49.71,49.78,46.76	49.65	PKKKNKHKHKQSRTQDPVPPETPSDSDHKKKKKKKEEDPDRKRKKKEKKKKKNRHSPDHPGMGSSQASSSSSLR	SHHHHHHHHHHHHHTT	59.47,58.29,50.91,56.4,47.45,50.75,45.83,42.78,50.08,41.34,48.91,44.28,44.36,48.09,46.07,40.36,43.43,43.42,52.44,50.86,43.32,49.24,42.2,52.14,41.54,51.67,51.87,56.88,48.27,53.08,49.47,49.65,49.71,49.78,46.76,50.2,52.54,56.95,65.37,64.06,61.5,65.72,66.9,67.79,69.38,70.39,66.81,68.86,67.31,67.26,66.51,64.18,61.77,62.08,55.03,42.49,49.06,42.8,44.99,48.02,37.79,44.3,43.82,43.4,47.41,43.68,43.38,47.84…	49.745	FRLHTGPLPEQCRLMHIQPPKKKNKHKHKQSRTQDPVPPETPSDSDHKKK	KKKKEEDPDRKRKKKEKKKKKNRHSPDHPGMGSSQASSSSSLR|||||||	G SS HHHHHHH	SHHHHHHHHHHHHHTT |||||||
A0MZ66	A0MZ66_p_1_1	9	353	361	P	A0MZ66_1	169	343	511	0.665	0.665	PPPPPPPPP		49.4,46.08,50.68,50.57,50.93,51.28,47.24,47.02,50.78	50.57	KRVNQSENSVPPPPPPPPPLPPPPPNPIRSLMSMIRKRSHPSGSGAKKEKATQPETTEEVTDLKRQAVEEMMDRIKKGVHLRPVNQTARPKTKPESSKGCESAVDELKGILGTLNKSTSSRSLKSLDPENSETELERILRRRKVTAEADSSSPTGILATSESKSMPVLG	HHHHHHTT SS S TTHHHHHHHHHHHHHHHHHHH S HHHHHHHHHHHHHHHSS SS HHHHHHHHHHHHHHTTS	88.04,88.17,81.86,76.28,74.81,66.97,58.38,50.68,41.61,41.31,49.4,46.08,50.68,50.57,50.93,51.28,47.24,47.02,50.78,52.68,51.99,52.13,61.26,58.53,54.18,56.5,45.29,46.1,53.61,50.29,50.8,51.98,50.9,51.05,50.9,51.48,46.68,42.11,38.57,44.02,53.38,39.0,37.5,36.95,38.35,39.86,39.28,38.67,34.08,33.38,36.43,38.31,36.22,39.44,37.23,40.05,42.36,49.65,53.37,53.4,68.96,78.65,78.86,80.44,87.35,88.83,84.59,91.08,…	50.9	KQQLELLEEDKKELELKYQNSEEKARNLKHSVDELQKRVNQSENSVPPPP	PPPPPLPPPPPNPIRSLMSMIRKRSHPSGSGAKKEKATQPETTEEVTDLK	HHHHHHHHHHHHHHHHHHHHHHHHHHHHHHHHHHHHHHHHHHTT	SS S TTHHHHHH
A0PJX2	A0PJX2_p_1_1	7	26	32	E	A0PJX2_1	46	1	46	0.589	0.589	EEEEEEE		39.68,47.48,40.51,45.51,45.59,43.01,46.43	45.51	MRGLRWRYTRLPSQVEDTLSGEEGNEEEEEEEAAPDPAAAPEDPTV		44.08,47.45,45.72,45.67,56.7,40.77,54.73,41.7,55.64,44.19,40.88,54.24,48.7,39.19,50.15,48.8,47.54,44.69,48.79,48.64,44.57,51.13,48.02,39.54,44.08,39.68,47.48,40.51,45.51,45.59,43.01,46.43,47.15,53.54,53.02,52.83,55.39,50.21,47.91,49.59,47.71,46.38,52.87,55.92,61.73,72.3	47.625	||||||||||||||||||||||MRGLRWRYTRLPSQVEDTLSGEEGNEEE	EEEEAAPDPAAAPEDPTVPQLTEASQVLSASEIRQLSFHFPPRVTGHPWS	||||||||||||||||||||||	BSS SS HHHHHHHHTTS TTTTT EE
A1L020	A1L020_p_1_1	7	62	68	G	A1L020_1	63	49	111	0.759	0.759	GGGGGGG		46.23,42.87,43.72,46.18,46.49,44.42,43.54	44.42	GLGEPPAPTAGEDGGGGGGGAPAQPAAPPQPAPPPPPAAPPAAPTAAPAAQTPQPPTAPKGAS	T HH	51.04,49.87,45.67,52.1,64.49,55.76,49.88,48.68,50.11,42.32,44.86,50.27,45.18,46.23,42.87,43.72,46.18,46.49,44.42,43.54,52.76,47.02,50.1,53.67,52.19,53.85,55.2,58.48,58.43,56.29,59.8,63.61,66.89,72.06,72.74,71.86,69.46,55.65,56.81,68.03,62.79,44.76,47.92,55.94,44.24,42.79,45.6,51.65,44.02,40.0,45.14,41.15,43.18,45.2,50.74,54.43,49.73,51.24,43.66,39.24,42.43,51.19,57.25	50.11	GFGELGCFGGSAKDRGLLEDERALQLALDQLCLLGLGEPPAPTAGEDGGG	GGGGAPAQPAAPPQPAPPPPPAAPPAAPTAAPAAQTPQPPTAPKGASDAK	TTHHHHHHHHHHHHHHHHHHHHTT	HHHHH
A1L020	A1L020_p_2_1	7	409	415	S	A1L020_2	50	412	461	0.737	0.737	SSSSSSS		34.91,37.01,34.14,36.97,35.9,42.91,41.02	36.97	SSSSAKARAGPPGAHRSPATSAGPELAGLPRRPPGEPLQGFSKLGGGGLR	SSSS	36.97,35.9,42.91,41.02,35.67,36.53,32.65,36.54,36.72,31.5,53.93,41.59,33.13,34.39,33.1,30.37,41.65,44.14,35.84,35.3,40.99,42.47,36.03,47.03,38.6,44.74,37.21,38.71,40.81,40.71,37.31,42.1,43.28,42.42,40.94,43.52,37.37,45.93,44.98,39.38,41.99,46.67,46.84,46.74,38.61,36.18,38.47,36.32,37.79,41.9	39.045	DFGYGGYLFPGYGVGKQDVYYGVAETSPPLWAGQENATPTSVLFSSASSS	SSSSAKARAGPPGAHRSPATSAGPELAGLPRRPPGEPLQGFSKLGGGGLR		SSSS
A1YPR0	A1YPR0_p_1_1	9	154	162	E	A1YPR0_1	90	129	218	0.382	0.382	EEEEEEEEE		45.31,39.66,39.38,36.64,31.25,35.79,30.28,37.78,34.38	36.64	PGGDGGEEDDKEDDDDDEDDDDEEDEEEEEEEEEDDDDDTEDFADQENLPDPQDISCHQSPSKTDHLTEKAYSDTPRDFPDSFQAGSPGH	S S S	52.72,41.94,39.48,37.18,37.69,35.09,36.93,44.54,36.2,43.94,49.17,35.9,44.18,42.17,45.21,43.56,46.42,44.93,39.26,44.14,41.38,43.24,42.0,43.91,40.15,45.31,39.66,39.38,36.64,31.25,35.79,30.28,37.78,34.38,38.69,38.84,36.23,39.24,35.09,39.12,36.78,30.62,28.88,30.97,30.81,32.22,27.92,26.28,30.35,30.45,28.73,34.2,33.43,28.48,36.58,29.55,35.13,32.11,30.98,30.09,31.39,27.71,30.82,30.34,28.27,26.86,35.55,3…	33.49	LNAARMLEIQCIVNVCLEIMEPGGDGGEEDDKEDDDDDEDDDDEEDEEEE	EEEEEDDDDDTEDFADQENLPDPQDISCHQSPSKTDHLTEKAYSDTPRDF	HHHHHHTT HHHHHHHHHTT S	S S
A4D2P6	A4D2P6_p_1_1	6	756	761	P	A4D2P6_6	66	718	783	0.712	0.712	PPPPPP		62.55,61.49,63.51,63.74,65.74,60.55	63.03	SFVTNERSSASDCISSSEEGSSLTYSSISDHIPPPPLSPPPPPPLPFHDAKPSSRSSDGSRGPAQA		30.04,35.55,29.98,34.8,32.85,33.88,38.44,35.97,31.64,35.11,33.85,34.66,32.58,35.04,30.61,33.72,33.7,35.49,36.75,35.82,36.11,35.59,35.41,36.51,36.6,36.53,41.16,37.37,39.57,38.04,38.23,38.21,45.03,53.28,51.59,48.85,52.29,49.48,62.55,61.49,63.51,63.74,65.74,60.55,51.49,55.28,45.97,42.94,36.83,38.18,41.72,43.01,41.48,47.08,41.27,40.48,43.88,41.75,39.65,43.98,41.01,42.4,49.35,42.12,44.49,42.71	39.61	EMSFHDDQGSFVTNERSSASDCISSSEEGSSLTYSSISDHIPPPPLSPPP	PPPLPFHDAKPSSRSSDGSRGPAQALAKPLTQLSHPVPPPPPPPLPPPVP
A6NF34	A6NF34_p_2_1	11	401	411	P	A6NF34_1	32	382	413	0.447	0.447	PPPPPPPPPPP		76.86,76.45,77.13,78.42,78.13,78.47,79.13,79.04,78.38,79.58,78.39	78.39	EPPPVQKPEKEPEQEKPPSPPPPPPPPPPPLP		50.97,58.53,55.81,54.71,55.69,46.31,54.27,45.05,43.69,47.5,42.56,43.93,48.58,49.23,46.15,52.87,71.21,66.61,65.5,76.86,76.45,77.13,78.42,78.13,78.47,79.13,79.04,78.38,79.58,78.39,73.67,79.56	62.015	YFVPLLLLVPLLLCCVWRLCRKQTVKEPPPVQKPEKEPEQEKPPSPPPPP	PPPPPPLPPPPPAPVNTCPTVIICCCGCQGVGGMRRIEGNLDTFCDLSHA	GHHHHHHHHHHHHHHHHHHHHTT
A6NFI3	A6NFI3_p_1_1	8	29	36	E	A6NFI3_1	148	1	148	0.601	0.601	EEEEEEEE		41.43,40.43,42.99,41.59,41.74,42.55,43.16,42.02	41.88	MAALHTTPDSPAAQLERAEDGSECDPDQEEEEEEEEKGEEVQEVEEEEEEIVVEEEEEGVAEVVQDAQVEAVAEVEVEADVEEEDVKEVLAEEECPALGTQERLSRGGDAKSPVLQEKGLQASRAPATPRDEDLEEEEEEEEDEDEDD		37.07,34.09,41.76,39.07,42.01,37.99,40.88,45.41,43.64,38.54,46.54,34.81,38.06,38.87,40.38,37.32,39.05,42.0,44.09,42.13,44.59,46.35,43.31,41.03,48.13,49.97,40.57,37.93,41.43,40.43,42.99,41.59,41.74,42.55,43.16,42.02,39.49,39.94,41.34,40.53,39.24,38.57,40.35,44.64,41.55,41.66,45.37,43.09,41.86,41.78,40.47,38.03,35.95,41.88,38.9,39.04,37.25,38.93,35.91,34.21,36.7,39.88,38.91,36.63,37.91,35.61,38.45,…	38.555	||||||||||||||||||MAALHTTPDSPAAQLERAEDGSECDPDQEEEE	EEEEKGEEVQEVEEEEEEIVVEEEEEGVAEVVQDAQVEAVAEVEVEADVE	||||||||||||||||||
A6NFI3	A6NFI3_p_2_1	6	45	50	E	A6NFI3_1	148	1	148	0.601	0.601	EEEEEE		41.55,41.66,45.37,43.09,41.86,41.78	41.82	MAALHTTPDSPAAQLERAEDGSECDPDQEEEEEEEEKGEEVQEVEEEEEEIVVEEEEEGVAEVVQDAQVEAVAEVEVEADVEEEDVKEVLAEEECPALGTQERLSRGGDAKSPVLQEKGLQASRAPATPRDEDLEEEEEEEEDEDEDD		37.07,34.09,41.76,39.07,42.01,37.99,40.88,45.41,43.64,38.54,46.54,34.81,38.06,38.87,40.38,37.32,39.05,42.0,44.09,42.13,44.59,46.35,43.31,41.03,48.13,49.97,40.57,37.93,41.43,40.43,42.99,41.59,41.74,42.55,43.16,42.02,39.49,39.94,41.34,40.53,39.24,38.57,40.35,44.64,41.55,41.66,45.37,43.09,41.86,41.78,40.47,38.03,35.95,41.88,38.9,39.04,37.25,38.93,35.91,34.21,36.7,39.88,38.91,36.63,37.91,35.61,38.45,…	38.555	|||MAALHTTPDSPAAQLERAEDGSECDPDQEEEEEEEEKGEEVQEVEEE	EEEIVVEEEEEGVAEVVQDAQVEAVAEVEVEADVEEEDVKEVLAEEECPA	|||
A6NFI3	A6NFI3_p_3_1	8	135	142	E	A6NFI3_1	148	1	148	0.601	0.601	EEEEEEEE		38.97,41.67,40.2,34.81,39.24,40.4,40.38,38.81	39.72	MAALHTTPDSPAAQLERAEDGSECDPDQEEEEEEEEKGEEVQEVEEEEEEIVVEEEEEGVAEVVQDAQVEAVAEVEVEADVEEEDVKEVLAEEECPALGTQERLSRGGDAKSPVLQEKGLQASRAPATPRDEDLEEEEEEEEDEDEDD		37.07,34.09,41.76,39.07,42.01,37.99,40.88,45.41,43.64,38.54,46.54,34.81,38.06,38.87,40.38,37.32,39.05,42.0,44.09,42.13,44.59,46.35,43.31,41.03,48.13,49.97,40.57,37.93,41.43,40.43,42.99,41.59,41.74,42.55,43.16,42.02,39.49,39.94,41.34,40.53,39.24,38.57,40.35,44.64,41.55,41.66,45.37,43.09,41.86,41.78,40.47,38.03,35.95,41.88,38.9,39.04,37.25,38.93,35.91,34.21,36.7,39.88,38.91,36.63,37.91,35.61,38.45,…	38.555	VLAEEECPALGTQERLSRGGDAKSPVLQEKGLQASRAPATPRDEDLEEEE	EEEEDEDEDDLLTAGCQELVTFEDVAVYFSLEEWERLEADQRGLYQEVMQ		STTT BHHHHTTS HHHHHHHHHHHH
A6NGB9	A6NGB9_p_1_1	7	4	10	P	A6NGB9_1	414	1	414	0.74	0.74	PPPPPPP		87.13,85.79,85.95,87.23,86.73,86.35,86.71	86.71	MPVPPPPPPPLPPPPPPLGAPPPPPPSAPPVSTDTSSLRRADPKGRSALLADIQQGTRLRKVTQINDRSAPQIESSKGTNKEGGGSANTRGASTPPTLGDLFAGGFPVLRPAGQRDVAGGKTGQGPGSRAPSPRLPNKTISGPLIPPASPRLGNTSEAHGAARTAPPRPNVPAPPPPTPPPPPPPLPPPLPSSSPIKTPLVSPPGPLTKGNLPVVAPPVPCAPPPPPPPPPPTPPPLPPASVLSDKAVKPQLAPLHLPPIPPPLPLLPPCGYPGLKAEPASPAQDAQEPPAPPPPLPPYASCSPRASLPAPPLPGVNSSSETPPPLPPKSPSFQAPPQKAGAQALPAPPAPPGSQPFLQKKRHGRPGAGGGKLNPPPAPPARSPTTELSSKSQQATAWT…	HHHHHHHHHHHHH S S GGGGGTT TT TT	75.47,82.66,82.66,87.13,85.79,85.95,87.23,86.73,86.35,86.71,86.82,84.78,84.25,83.59,80.67,79.63,76.51,70.46,64.73,70.05,71.1,71.51,73.87,76.86,76.6,71.8,65.04,64.53,60.98,51.9,42.94,37.13,41.93,40.27,44.62,48.78,42.34,52.02,52.42,53.66,58.31,59.59,69.84,76.04,88.23,94.15,93.18,93.0,95.41,96.25,94.61,94.32,93.53,96.28,96.65,95.16,94.06,94.82,91.46,93.8,94.75,91.25,90.67,88.43,85.85,83.53,82.61,87.…	51.725	||||||||||||||||||||||||||||||||||||||||||||MPVPPP	PPPPLPPPPPPLGAPPPPPPSAPPVSTDTSSLRRADPKGRSALLADIQQG	||||||||||||||||||||||||||||||||||||||||||||	HHHHHHHHHHHHH
A6NGB9	A6NGB9_p_2_1	6	12	17	P	A6NGB9_1	414	1	414	0.74	0.74	PPPPPP		84.78,84.25,83.59,80.67,79.63,76.51	82.13	MPVPPPPPPPLPPPPPPLGAPPPPPPSAPPVSTDTSSLRRADPKGRSALLADIQQGTRLRKVTQINDRSAPQIESSKGTNKEGGGSANTRGASTPPTLGDLFAGGFPVLRPAGQRDVAGGKTGQGPGSRAPSPRLPNKTISGPLIPPASPRLGNTSEAHGAARTAPPRPNVPAPPPPTPPPPPPPLPPPLPSSSPIKTPLVSPPGPLTKGNLPVVAPPVPCAPPPPPPPPPPTPPPLPPASVLSDKAVKPQLAPLHLPPIPPPLPLLPPCGYPGLKAEPASPAQDAQEPPAPPPPLPPYASCSPRASLPAPPLPGVNSSSETPPPLPPKSPSFQAPPQKAGAQALPAPPAPPGSQPFLQKKRHGRPGAGGGKLNPPPAPPARSPTTELSSKSQQATAWT…	HHHHHHHHHHHHH S S GGGGGTT TT TT	75.47,82.66,82.66,87.13,85.79,85.95,87.23,86.73,86.35,86.71,86.82,84.78,84.25,83.59,80.67,79.63,76.51,70.46,64.73,70.05,71.1,71.51,73.87,76.86,76.6,71.8,65.04,64.53,60.98,51.9,42.94,37.13,41.93,40.27,44.62,48.78,42.34,52.02,52.42,53.66,58.31,59.59,69.84,76.04,88.23,94.15,93.18,93.0,95.41,96.25,94.61,94.32,93.53,96.28,96.65,95.16,94.06,94.82,91.46,93.8,94.75,91.25,90.67,88.43,85.85,83.53,82.61,87.…	51.725	||||||||||||||||||||||||||||||||||||MPVPPPPPPPLPPP	PPPLGAPPPPPPSAPPVSTDTSSLRRADPKGRSALLADIQQGTRLRKVTQ	||||||||||||||||||||||||||||||||||||	HHHHHHHHHHHHH S
A6NGB9	A6NGB9_p_3_1	6	21	26	P	A6NGB9_1	414	1	414	0.74	0.74	PPPPPP		71.1,71.51,73.87,76.86,76.6,71.8	72.835	MPVPPPPPPPLPPPPPPLGAPPPPPPSAPPVSTDTSSLRRADPKGRSALLADIQQGTRLRKVTQINDRSAPQIESSKGTNKEGGGSANTRGASTPPTLGDLFAGGFPVLRPAGQRDVAGGKTGQGPGSRAPSPRLPNKTISGPLIPPASPRLGNTSEAHGAARTAPPRPNVPAPPPPTPPPPPPPLPPPLPSSSPIKTPLVSPPGPLTKGNLPVVAPPVPCAPPPPPPPPPPTPPPLPPASVLSDKAVKPQLAPLHLPPIPPPLPLLPPCGYPGLKAEPASPAQDAQEPPAPPPPLPPYASCSPRASLPAPPLPGVNSSSETPPPLPPKSPSFQAPPQKAGAQALPAPPAPPGSQPFLQKKRHGRPGAGGGKLNPPPAPPARSPTTELSSKSQQATAWT…	HHHHHHHHHHHHH S S GGGGGTT TT TT	75.47,82.66,82.66,87.13,85.79,85.95,87.23,86.73,86.35,86.71,86.82,84.78,84.25,83.59,80.67,79.63,76.51,70.46,64.73,70.05,71.1,71.51,73.87,76.86,76.6,71.8,65.04,64.53,60.98,51.9,42.94,37.13,41.93,40.27,44.62,48.78,42.34,52.02,52.42,53.66,58.31,59.59,69.84,76.04,88.23,94.15,93.18,93.0,95.41,96.25,94.61,94.32,93.53,96.28,96.65,95.16,94.06,94.82,91.46,93.8,94.75,91.25,90.67,88.43,85.85,83.53,82.61,87.…	51.725	|||||||||||||||||||||||||||MPVPPPPPPPLPPPPPPLGAPPP	PPPSAPPVSTDTSSLRRADPKGRSALLADIQQGTRLRKVTQINDRSAPQI	|||||||||||||||||||||||||||	HHHHHHHHHHHHH S S
A6NGB9	A6NGB9_p_4_1	7	179	185	P	A6NGB9_1	414	1	414	0.74	0.74	PPPPPPP		85.89,84.6,85.96,87.47,85.03,85.76,87.22	85.89	MPVPPPPPPPLPPPPPPLGAPPPPPPSAPPVSTDTSSLRRADPKGRSALLADIQQGTRLRKVTQINDRSAPQIESSKGTNKEGGGSANTRGASTPPTLGDLFAGGFPVLRPAGQRDVAGGKTGQGPGSRAPSPRLPNKTISGPLIPPASPRLGNTSEAHGAARTAPPRPNVPAPPPPTPPPPPPPLPPPLPSSSPIKTPLVSPPGPLTKGNLPVVAPPVPCAPPPPPPPPPPTPPPLPPASVLSDKAVKPQLAPLHLPPIPPPLPLLPPCGYPGLKAEPASPAQDAQEPPAPPPPLPPYASCSPRASLPAPPLPGVNSSSETPPPLPPKSPSFQAPPQKAGAQALPAPPAPPGSQPFLQKKRHGRPGAGGGKLNPPPAPPARSPTTELSSKSQQATAWT…	HHHHHHHHHHHHH S S GGGGGTT TT TT	75.47,82.66,82.66,87.13,85.79,85.95,87.23,86.73,86.35,86.71,86.82,84.78,84.25,83.59,80.67,79.63,76.51,70.46,64.73,70.05,71.1,71.51,73.87,76.86,76.6,71.8,65.04,64.53,60.98,51.9,42.94,37.13,41.93,40.27,44.62,48.78,42.34,52.02,52.42,53.66,58.31,59.59,69.84,76.04,88.23,94.15,93.18,93.0,95.41,96.25,94.61,94.32,93.53,96.28,96.65,95.16,94.06,94.82,91.46,93.8,94.75,91.25,90.67,88.43,85.85,83.53,82.61,87.…	51.725	SPRLPNKTISGPLIPPASPRLGNTSEAHGAARTAPPRPNVPAPPPPTPPP	PPPPLPPPLPSSSPIKTPLVSPPGPLTKGNLPVVAPPVPCAPPPPPPPPP
A6NGB9	A6NGB9_p_5_1	10	223	232	P	A6NGB9_1	414	1	414	0.74	0.74	PPPPPPPPPP		77.13,80.21,84.16,85.23,85.09,86.92,86.92,84.42,84.2,82.13	84.31	MPVPPPPPPPLPPPPPPLGAPPPPPPSAPPVSTDTSSLRRADPKGRSALLADIQQGTRLRKVTQINDRSAPQIESSKGTNKEGGGSANTRGASTPPTLGDLFAGGFPVLRPAGQRDVAGGKTGQGPGSRAPSPRLPNKTISGPLIPPASPRLGNTSEAHGAARTAPPRPNVPAPPPPTPPPPPPPLPPPLPSSSPIKTPLVSPPGPLTKGNLPVVAPPVPCAPPPPPPPPPPTPPPLPPASVLSDKAVKPQLAPLHLPPIPPPLPLLPPCGYPGLKAEPASPAQDAQEPPAPPPPLPPYASCSPRASLPAPPLPGVNSSSETPPPLPPKSPSFQAPPQKAGAQALPAPPAPPGSQPFLQKKRHGRPGAGGGKLNPPPAPPARSPTTELSSKSQQATAWT…	HHHHHHHHHHHHH S S GGGGGTT TT TT	75.47,82.66,82.66,87.13,85.79,85.95,87.23,86.73,86.35,86.71,86.82,84.78,84.25,83.59,80.67,79.63,76.51,70.46,64.73,70.05,71.1,71.51,73.87,76.86,76.6,71.8,65.04,64.53,60.98,51.9,42.94,37.13,41.93,40.27,44.62,48.78,42.34,52.02,52.42,53.66,58.31,59.59,69.84,76.04,88.23,94.15,93.18,93.0,95.41,96.25,94.61,94.32,93.53,96.28,96.65,95.16,94.06,94.82,91.46,93.8,94.75,91.25,90.67,88.43,85.85,83.53,82.61,87.…	51.725	TPPPPPPPLPPPLPSSSPIKTPLVSPPGPLTKGNLPVVAPPVPCAPPPPP	PPPPPTPPPLPPASVLSDKAVKPQLAPLHLPPIPPPLPLLPPCGYPGLKA
A6NGE4	A6NGE4_p_1_1	6	101	106	E	A6NGE4_1	122	1	122	0.655	0.655	EEEEEE		27.18,25.69,28.24,27.05,26.57,27.97	27.115	MSHQEGSTGGLPDLVTESLFSSPEEQSGVAAVTAASSDIEMAATEPSTGDGGDTRDGGFLNDASTENQNTDSESSSEDVELESMGEGLFGYPLVGEETEREEEEEEMEEEGEEEEQPRMCPR	TT	35.67,39.95,39.82,41.88,36.38,41.58,44.84,33.19,36.91,34.54,31.53,42.94,31.95,37.51,32.62,38.76,32.66,35.21,34.5,31.43,28.51,31.43,45.7,28.87,32.79,29.37,34.52,27.4,30.78,33.59,27.38,34.26,33.2,26.96,32.0,27.83,33.7,26.96,32.27,27.74,35.31,31.73,29.71,32.4,27.31,35.31,28.91,40.62,32.38,34.45,33.15,29.92,35.25,29.6,35.34,31.37,32.91,30.26,29.37,29.02,32.36,32.79,29.81,28.85,33.0,29.65,33.17,31.37,…	31.345	TRDGGFLNDASTENQNTDSESSSEDVELESMGEGLFGYPLVGEETEREEE	EEEMEEEGEEEEQPRMCPRCGGTNHDQCLLDEDQALEEWISSETSALPRS		TTTTTTTHHHHHHHHHHHHHHHHHHHTS
A6NHQ2	A6NHQ2_p_1_1	6	9	14	G	A6NHQ2_1	97	1	97	0.636	0.636	GGGGGG		35.7,29.73,35.14,32.5,29.74,36.94	33.82	MKSAASSRGGGGGGRGGGGWGSWGGGRGGGGGAGKGGGGDGGGQGGKGGFGARARGFGGGGRGRGRGGGDGKDRGGGGQRRGGVAKSKSRRRKGAMV		40.68,36.9,34.74,41.21,37.46,39.68,32.44,39.26,35.7,29.73,35.14,32.5,29.74,36.94,33.92,35.94,30.66,33.42,28.2,30.42,34.78,29.53,33.85,30.96,30.7,33.25,31.56,35.76,31.68,35.0,31.3,37.08,36.58,38.24,33.18,35.67,32.63,30.47,35.53,38.63,37.17,31.7,33.41,32.82,34.94,33.68,38.96,32.47,30.48,37.56,32.2,37.76,34.48,37.72,37.15,34.69,36.07,34.19,32.19,30.15,36.54,35.65,38.49,36.49,37.66,34.59,34.7,31.37,3…	35.7	|||||||||||||||||||||||||||||||||||||||MKSAASSRGGG	GGGRGGGGWGSWGGGRGGGGGAGKGGGGDGGGQGGKGGFGARARGFGGGG	|||||||||||||||||||||||||||||||||||||||
A6NHT5	A6NHT5_p_1_1	7	18	24	P	A6NHT5_1	58	1	58	0.633	0.633	PPPPPPP		80.42,81.28,80.89,81.76,82.07,78.87,77.2	80.89	MPEPGPDAAGTASAQPQPPPPPPPAPKESPFSIKNLLNGDHHRPPPKPQPPPRTLFAP	TT HHHHHH S	54.24,66.85,66.25,69.41,64.73,70.8,60.61,64.18,63.7,58.03,57.16,61.84,58.4,65.71,70.15,75.55,72.48,80.42,81.28,80.89,81.76,82.07,78.87,77.2,75.3,71.67,68.63,73.23,77.23,76.92,75.06,77.16,75.95,75.73,72.86,71.64,71.7,69.89,54.66,53.36,57.24,53.82,54.15,64.32,63.93,69.01,63.4,65.38,58.81,69.72,69.83,63.62,48.74,51.42,48.07,46.79,49.83,46.23	67.74	||||||||||||||||||||||||||||||MPEPGPDAAGTASAQPQPPP	PPPPAPKESPFSIKNLLNGDHHRPPPKPQPPPRTLFAPASAAAAAAAAAA	||||||||||||||||||||||||||||||	TT HHHHHH S
A6NIX2	A6NIX2_p_1_1	6	98	103	G	A6NIX2_1	128	22	149	0.673	0.673	GGGGGG		34.71,32.22,29.41,29.02,31.38,29.07	30.395	ELEPGCGSPGRGRRGPRPGPGDEAAPALGRRGKGSGGPEAGADGLSRGERGPRRAAVPELSAQPAGSPRASLAGSDGGGGGGSARSSGISLGYDQRHGSPRSGRSDPRPGPGPPSVGSARSSVSSLGS	EEE	36.28,40.01,43.1,40.2,37.67,36.13,36.7,47.08,44.27,39.44,44.28,41.02,40.04,43.16,41.19,41.05,41.44,42.77,37.39,41.81,38.4,37.92,37.04,34.46,42.6,40.54,33.26,39.36,34.72,40.46,40.53,37.61,42.84,38.69,46.57,35.62,39.04,46.21,41.23,42.49,38.03,48.68,42.71,39.04,42.38,39.47,38.16,37.3,41.18,39.58,36.47,40.73,38.79,32.95,35.58,36.29,32.32,37.24,28.49,37.05,30.93,34.38,35.7,32.24,39.25,31.83,40.27,40.5…	39.715	RRGKGSGGPEAGADGLSRGERGPRRAAVPELSAQPAGSPRASLAGSDGGG	GGGSARSSGISLGYDQRHGSPRSGRSDPRPGPGPPSVGSARSSVSSLGSR		EEE
A6NJZ7	A6NJZ7_p_1_1	6	333	338	P	A6NJZ7_3	70	295	364	0.603	0.603	PPPPPP		34.82,34.2,34.06,33.95,35.61,31.35	34.13	SLDSTRSLPKASKSEERPSSPDTSTPGSRRLSPPPSPLPPPPPPSAHRKLSNPRGGEGSESQPCEVLTPS		22.51,27.0,21.36,25.25,20.88,25.28,23.78,26.92,26.51,19.49,20.46,26.58,20.81,23.65,21.36,28.75,20.16,29.48,25.35,23.33,29.79,22.94,27.96,26.96,20.68,28.06,25.77,26.94,28.33,24.1,29.99,30.05,31.45,38.78,36.13,32.23,41.88,34.94,34.82,34.2,34.06,33.95,35.61,31.35,27.67,29.02,25.44,25.62,27.68,24.08,26.29,22.26,27.45,23.66,27.19,29.43,26.51,28.92,27.39,25.4,26.71,24.11,24.38,22.33,27.32,31.4,28.74,31…	26.98	DCFAPACSRSLDSTRSLPKASKSEERPSSPDTSTPGSRRLSPPPSPLPPP	PPPSAHRKLSNPRGGEGSESQPCEVLTPSPPGLGHHELIKLNWLLAKALW		HHHHHHHHHHHHHHHH
A6NKD9	A6NKD9_p_1_1	8	166	173	G	A6NKD9_1	107	162	268	0.728	0.728	GGGGGGGG		45.31,38.56,43.8,41.91,41.94,42.17,43.28,41.01	42.055	GAASGGGGGGGGAGSRSSIDSQASLSGPLSGGAPGAGARDVGDGSSTSSAGSGGSPDHHHHVPPPLLPPGPHKAPDGKAGATRRSLDDLSAPPHHRSIPNGLHDPSS	HHSS S S HHH	60.03,54.83,53.94,53.83,45.31,38.56,43.8,41.91,41.94,42.17,43.28,41.01,47.46,45.22,44.88,54.54,39.27,52.0,42.22,40.58,51.13,42.33,45.77,45.21,46.48,42.79,36.53,45.39,35.26,37.82,38.87,35.54,40.68,39.97,43.0,43.09,41.18,50.91,62.7,62.73,51.94,56.06,61.25,50.91,39.98,55.87,41.6,45.56,49.78,44.15,48.26,45.5,46.07,38.85,44.33,54.14,44.94,49.43,43.62,50.48,43.04,50.16,54.87,58.58,46.72,51.1,55.77,53.3…	44.71	VARSQQKLRELEARQEALLRENLELKELVLLLDEERAALAATGAASGGGG	GGGGAGSRSSIDSQASLSGPLSGGAPGAGARDVGDGSSTSSAGSGGSPDH	HHHHHHHHHHHHHHHHHHHHHHHHHHHHHHHHHHHHHHHHHHHHSS	S S
A6NLX4	A6NLX4_p_1_1	6	138	143	P	A6NLX4_1	20	128	147	0.7	0.7	PPPPPP		65.74,75.47,72.27,77.25,79.47,78.22	76.36	AIPMEASSEEPPPPPPLPPE		40.33,52.05,48.48,46.41,44.86,45.32,44.18,40.25,50.8,53.98,65.74,75.47,72.27,77.25,79.47,78.22,78.46,77.38,72.05,61.0	57.49	GVQEDLMDLHPVYVESQLMDADLEVSLVPPLEDQSLVAIPMEASSEEPPP	PPPLPPE|||||||||||||||||||||||||||||||||||||||||||		|||||||||||||||||||||||||||||||||||||||||||
A6NNA2	A6NNA2_p_1_1	7	169	175	K	A6NNA2_2	499	99	597	0.49	0.49	KKKKKKK		55.74,52.61,54.91,53.04,54.17,52.85,53.21	53.21	EGVLTREDRPGGHIVAETPRLTEGAEPGLEYAPFDDDDGPVDCDCPASCYRGHRGYRTKHWSSSSASPPPKKKKKKKGGHRRSRKKRRLESECSCGSSSPLRKKKKSVKKHRRDRSDSGSRRKRRHRSRSSKCKRKEKNKEKKRPHTESPGRRSHRHSSGSSHSPSLSSHYSDSRSPSRLSPKHRDEGRKTGSQRSSGSRSPSPSGGSGWGSPQRNGGSGQRSGAHGGRPGSAHSPPDKPSSPSPRVRDKAAAAAPTPPARGKESPSPRSAPSSQGRGGRAAGGAGRRRRRRRRRRRSRSSASAPRRRGRRRPRPAPPRGSSRSLSRARSSSDSGSGRGAPGPGPEPGSERGHGGHGKRAKERPPRARPASTSPSPGAHGRRGGPEGKSSSRSPGPHPR…	TTTT SS GGGGS SSS S TTGGGHHHHHHHHTTTSS	64.92,57.34,55.03,48.76,40.44,42.15,38.39,36.21,44.24,40.41,39.36,35.21,44.58,42.76,45.86,47.01,40.65,47.03,47.38,42.19,41.07,44.34,39.1,39.48,42.64,39.96,44.07,39.52,44.88,37.23,36.1,40.91,46.75,44.21,52.85,43.29,51.75,48.72,52.08,56.19,60.6,53.02,53.69,53.78,59.49,56.45,55.89,57.39,58.57,53.02,53.3,38.68,45.25,41.07,43.19,39.31,42.99,46.62,44.16,43.01,38.92,35.96,31.3,31.39,36.65,42.06,38.89,59…	44.88	GAEPGLEYAPFDDDDGPVDCDCPASCYRGHRGYRTKHWSSSSASPPPKKK	KKKKGGHRRSRKKRRLESECSCGSSSPLRKKKKSVKKHRRDRSDSGSRRK	GGGGS
A6NNA2	A6NNA2_p_2_1	11	385	395	R	A6NNA2_2	499	99	597	0.49	0.49	RRRRRRRRRRR		45.13,39.77,44.08,43.54,42.94,41.62,40.71,41.92,40.32,36.45,39.57	41.62	EGVLTREDRPGGHIVAETPRLTEGAEPGLEYAPFDDDDGPVDCDCPASCYRGHRGYRTKHWSSSSASPPPKKKKKKKGGHRRSRKKRRLESECSCGSSSPLRKKKKSVKKHRRDRSDSGSRRKRRHRSRSSKCKRKEKNKEKKRPHTESPGRRSHRHSSGSSHSPSLSSHYSDSRSPSRLSPKHRDEGRKTGSQRSSGSRSPSPSGGSGWGSPQRNGGSGQRSGAHGGRPGSAHSPPDKPSSPSPRVRDKAAAAAPTPPARGKESPSPRSAPSSQGRGGRAAGGAGRRRRRRRRRRRSRSSASAPRRRGRRRPRPAPPRGSSRSLSRARSSSDSGSGRGAPGPGPEPGSERGHGGHGKRAKERPPRARPASTSPSPGAHGRRGGPEGKSSSRSPGPHPR…	TTTT SS GGGGS SSS S TTGGGHHHHHHHHTTTSS	64.92,57.34,55.03,48.76,40.44,42.15,38.39,36.21,44.24,40.41,39.36,35.21,44.58,42.76,45.86,47.01,40.65,47.03,47.38,42.19,41.07,44.34,39.1,39.48,42.64,39.96,44.07,39.52,44.88,37.23,36.1,40.91,46.75,44.21,52.85,43.29,51.75,48.72,52.08,56.19,60.6,53.02,53.69,53.78,59.49,56.45,55.89,57.39,58.57,53.02,53.3,38.68,45.25,41.07,43.19,39.31,42.99,46.62,44.16,43.01,38.92,35.96,31.3,31.39,36.65,42.06,38.89,59…	44.88	SPSPRVRDKAAAAAPTPPARGKESPSPRSAPSSQGRGGRAAGGAGRRRRR	RRRRRRSRSSASAPRRRGRRRPRPAPPRGSSRSLSRARSSSDSGSGRGAP
A6NNC1	A6NNC1_p_1_1	6	393	398	S	A6NNC1_5	108	362	469	0.615	0.615	SSSSSS		39.09,38.42,37.31,36.45,38.72,37.23	37.865	ATAAARAQRSEVRYNQRSQTSRTRSCLKRNASSSSSSHSSTEGLQELKRRRGPASSHCQLAHSSSNTVSEDGPQAVSSGHRCENKAGTAPGQTLAPRGGSPRSQASRP		40.96,39.09,39.43,38.96,35.4,33.41,35.47,40.55,34.73,33.95,34.22,34.98,34.93,33.44,37.44,36.42,36.09,34.25,38.96,36.24,34.76,37.38,34.16,39.26,33.64,34.57,41.16,36.98,37.61,37.18,38.15,39.09,38.42,37.31,36.45,38.72,37.23,42.96,42.01,42.93,43.15,41.07,37.52,38.09,43.64,43.06,44.71,41.93,40.91,43.57,40.81,38.48,44.85,37.38,38.33,38.06,35.95,32.48,33.81,33.2,37.18,35.55,34.42,38.35,40.18,40.1,41.72,…	38.81	SLLNAVDGGPSHFLASATAAARAQRSEVRYNQRSQTSRTRSCLKRNASSS	SSSHSSTEGLQELKRRRGPASSHCQLAHSSSNTVSEDGPQAVSSGHRCEN
A6NNC1	A6NNC1_p_2_1	6	603	608	A	A6NNC1_7	77	536	612	0.807	0.807	AAAAAA		35.77,36.03,39.81,36.49,34.5,35.03	35.9	AEVPSTAPVSGKKHRPPGPLFSSSDPLPATSSHSRDSAQVTSLIPATFTAASRDAGMRRTRPGTSAPAAAAAALPPS		32.63,35.38,34.79,38.8,32.86,36.1,34.0,42.79,41.38,36.82,40.03,35.47,30.4,40.5,35.42,45.82,41.88,36.5,43.87,29.66,35.28,30.67,34.49,32.34,40.4,44.82,46.59,38.76,32.23,32.62,34.51,34.12,39.58,39.2,41.27,39.98,44.19,43.77,42.45,39.25,41.98,36.16,39.24,40.25,43.19,36.66,35.9,37.45,40.15,37.15,37.5,38.47,48.71,39.08,39.38,43.7,39.03,41.29,42.97,40.72,43.0,44.8,41.01,38.94,39.78,40.74,42.59,35.77,36.0…	39.2	FSSSDPLPATSSHSRDSAQVTSLIPATFTAASRDAGMRRTRPGTSAPAAA	AAALPPSTLNPTSGSLLNAVDGGPSHFLASATAAARAQRSEVRYNQRSQT
A6NNE9	A6NNE9_p_1_1	7	26	32	P	A6NNE9_1	161	1	161	0.665	0.665	PPPPPPP		83.03,83.36,83.74,84.52,83.55,80.2,81.26	83.36	MSFEGGHGGSRCRGAESGDAEPPPQPPPPPPPTPPPGEPAPVPAAPRYLPPLPASPETPERAAGPSEPLGEVAPRCRGADELPPPPLPLQPAGQEVAAAGDSGEGPRRLPEAAAAKGGPGESEAGAGGERERRGAGDQPETRSVCSSRSSSSGGGDQRAGH		48.58,43.57,48.99,40.66,48.95,53.05,54.91,45.63,46.73,49.65,51.38,42.67,44.46,50.57,46.26,51.92,53.39,51.47,53.52,64.42,67.72,74.67,78.13,79.32,80.62,83.03,83.36,83.74,84.52,83.55,80.2,81.26,78.13,76.07,77.48,60.71,52.75,53.78,51.4,49.68,62.41,59.4,46.14,51.48,49.46,41.38,51.43,38.12,50.19,46.75,44.31,50.7,40.25,36.8,45.22,41.52,42.35,35.21,44.6,39.99,38.22,39.31,39.29,40.34,34.96,41.17,39.57,38.…	42.69	||||||||||||||||||||||MSFEGGHGGSRCRGAESGDAEPPPQPPP	PPPPTPPPGEPAPVPAAPRYLPPLPASPETPERAAGPSEPLGEVAPRCRG	||||||||||||||||||||||
A6NNL0	A6NNL0_p_1_1	6	280	285	P	A6NNL0_1	52	273	324	0.757	0.757	PPPPPP		47.88,58.15,51.62,53.2,53.27,39.74	52.41	WSQGLPLPPPPPPAAQLPPIVSQGNAGPWPQGAHGESSLASSQAKAPPDDSC	TT	35.31,35.22,38.19,30.18,35.76,45.11,38.35,47.88,58.15,51.62,53.2,53.27,39.74,35.51,37.2,38.45,36.48,35.04,34.8,36.8,36.3,36.5,36.53,38.69,38.27,36.34,40.0,41.91,34.05,46.7,36.65,38.1,36.6,38.86,40.76,34.31,32.02,31.62,37.5,38.44,36.17,33.07,36.57,32.86,36.55,36.24,37.01,42.59,37.43,32.21,34.04,31.25	36.625	APGALCGGVVCPPPLLLAAAPVVPVMAAQVVGGTQACEGGWSQGLPLPPP	PPPAAQLPPIVSQGNAGPWPQGAHGESSLASSQAKAPPDDSCNPRSVYEN		TT HHHHHHH
A6NNM3	A6NNM3_p_1_1	6	333	338	P	A6NNM3_3	70	295	364	0.603	0.603	PPPPPP		47.04,50.86,46.49,47.26,54.37,38.52	47.15	SLDSTRSLPKASKSEERPSSPDTSTPGSRRLSPPPSPLPPPPPPSAHRKLSNPRGGEGSESQPCEVLTPS		32.08,36.13,35.26,35.11,34.0,35.33,34.08,31.98,40.48,30.17,32.63,32.52,33.48,36.9,36.58,35.38,29.6,44.02,35.39,29.54,43.84,34.68,35.29,37.07,33.24,40.59,35.32,34.97,42.13,33.23,41.42,37.52,46.59,50.55,43.82,39.42,53.82,38.32,47.04,50.86,46.49,47.26,54.37,38.52,32.68,36.97,34.95,36.51,31.69,31.62,34.5,27.59,42.14,35.73,33.61,34.23,35.96,35.93,35.05,34.05,32.84,26.33,28.77,27.8,28.67,31.3,29.06,28.…	35.275	DCFAPACSRSLDSTRSLPKASKSEERPSSPDTSTPGSRRLSPPPSPLPPP	PPPSAHRKLSNPRGGEGSESQPCEVLTPSPPGLGHHELIKLNWLLAKALW		S HHHHHHHHHHHHHHHH
A6NNW6	A6NNW6_p_1_1	9	195	203	P	A6NNW6_1	43	184	226	0.62	0.62	PPPPPPPPP		55.15,56.86,57.48,57.09,55.26,58.24,54.63,51.59,55.62	55.62	YSTVPTPLPPVPPPPPPPPPTKKKGQKPGRKDTITEKPIAPAE	HTT	59.39,56.7,50.09,41.55,45.4,45.53,45.66,51.4,51.52,51.02,56.91,55.15,56.86,57.48,57.09,55.26,58.24,54.63,51.59,55.62,46.25,35.41,40.66,36.56,35.08,35.77,39.12,35.72,33.37,30.31,31.8,32.98,30.74,40.24,34.85,52.52,56.85,66.75,79.91,81.58,83.77,85.15,83.02	51.4	MAPSDQAEVDHLLRIFFASKVQEDKGRKELEKSLEYSTVPTPLPPVPPPP	PPPPPTKKKGQKPGRKDTITEKPIAPAEPVEPVLSGSMAIGAVSLAVAKA	TT HHHHHHHHHHHHHHHHHHHHHHHHHHHHHHHTT	TTTHHHHHHHHHHHHH
A6PVY3	A6PVY3_p_1_1	7	40	46	E	A6PVY3_1	24	36	59	0.354	0.354	EEEEEEE	HHHHHHH	56.67,56.79,55.34,52.91,54.89,56.47,54.56	55.34	EYSTEEEEEEEKEEQSTNSTLDPS	E HHHHHHHHHHHHTTS TT	72.02,63.53,58.33,61.31,56.67,56.79,55.34,52.91,54.89,56.47,54.56,53.56,54.29,53.8,50.93,49.84,51.11,47.0,48.23,49.75,53.77,53.28,56.74,61.24	54.425	||||||||MEIDGFQQLDLEKSVPSKKTTPKRIIHFVDGDIMEEYSTEEE	EEEEKEEQSTNSTLDPSKLSWGPYLRFWAGRIASTSFSTCEFLGGRFAVF	|||||||| SEEEE TTS EEEE HHH	HHHHHHHHHTTS TTTS HHHHHHHHHHHHHHHHHHHHHHHHHHHHHH
A7E2V4	A7E2V4_p_1_1	7	56	62	G	A7E2V4_1	21	45	65	0.62	0.62	GGGGGGG		26.92,24.01,26.49,24.42,24.5,25.54,25.0	25	RKQSAGPNSPTGGGGGGGSGG	S TTS S	82.06,72.12,55.34,32.1,26.0,27.17,28.45,28.82,24.39,24.27,30.06,26.92,24.01,26.49,24.42,24.5,25.54,25.0,29.23,27.49,28.91	27.17	EDGERFSFEDSDRFEEDSLCSFISEAESLCQNWRGWRKQSAGPNSPTGGG	GGGGSGGTRMRDGLVIPLVELSAKQVAFHIPFEVVEKVYPPVPEQLQLRI	STTS GGGGGGTTTT TTGGG GGGTTTS TTSS TTS	SS TT HHHHHHHHHHHHS HHHHHT SS HHHHHHH
A7KAX9	A7KAX9_p_1_1	6	1031	1036	P	A7KAX9_2	112	927	1038	0.694	0.694	PPPPPP		33.06,37.44,37.87,38.8,46.02,47.96	38.335	SNTTAQNASSSTWDKCVEERDATNRSPTQIVKMKTNETVAQEAYESEVQPLDQVAAEEVELPGKEDQSVSSSQSKAVASGQTQTGAVTHDPPQDSVPVSSVSLIPPPPPPKN		28.01,26.88,28.41,28.32,27.65,27.4,28.6,26.38,26.34,23.63,24.32,23.86,22.84,23.98,29.11,23.63,25.77,25.46,27.79,28.16,27.4,29.37,26.18,24.74,30.62,28.96,34.71,25.57,28.24,28.85,31.09,29.44,32.84,29.04,32.67,28.5,27.53,27.78,24.88,29.57,25.1,23.52,25.56,22.5,23.33,23.1,22.71,27.42,26.49,31.84,25.59,29.47,27.33,28.54,28.77,27.04,26.96,25.73,30.24,27.6,27.86,31.06,27.45,26.87,24.46,26.71,24.18,22.96…	28.685	EVELPGKEDQSVSSSQSKAVASGQTQTGAVTHDPPQDSVPVSSVSLIPPP	PPPKNVARMLALALAESAQQASTQSLKRPGTSQAGYTNYGDIAVATTEDN		HHHHHHHHHHHHHHHHHHHTT
A7MCY6	A7MCY6_p_1_1	7	428	434	P	A7MCY6_1	133	326	458	0.611	0.611	PPPPPPP		56.08,62.89,62.29,59.14,65.9,66.62,41.07	62.29	QARSGGQRHSPLSQRHSPAPQCPSPSPPARAAPPCPPCQSPVPQRRSPVPPCPSPQQRRSPASPSCPSPVPQRRSPVPPSCQSPSPQRRSPVPPSCPAPQPRPPPPPPPGERTLAERAYAKPPSHHVKAGFQG	HHHHTT	79.65,77.64,75.14,60.09,56.4,51.59,50.11,45.41,43.84,41.25,41.79,38.63,44.24,39.2,40.98,41.01,41.55,45.38,43.23,49.05,42.26,41.19,43.09,41.15,44.84,38.36,48.54,47.57,36.45,44.13,43.1,39.42,53.22,43.99,40.04,49.72,41.68,30.75,39.84,33.97,42.86,44.03,42.5,38.86,38.04,38.45,42.43,44.91,47.45,57.13,47.1,39.48,44.54,37.88,53.66,39.92,39.51,40.62,39.14,38.51,46.51,38.69,41.16,53.23,40.2,35.71,47.9,36.7…	41.73	QQRRSPASPSCPSPVPQRRSPVPPSCQSPSPQRRSPVPPSCPAPQPRPPP	PPPPGERTLAERAYAKPPSHHVKAGFQGRRSYSELAEGAAYAGASPPWLQ
A7MD48	A7MD48_p_1_1	6	109	114	K	A7MD48_1	211	38	248	0.406	0.406	KKKKKK		57.9,56.78,50.31,58.85,51.49,55.02	55.9	ARKPLPRTEPQNNPVVPAQDGPSEKLGQHLATEPLGTNSWERDKTCRELGATRGHSASHDKDLTPPPSSRGKKKKKKSTRKKRRRSSSYSPSPVKKKKKKSSKKHKRRRSFSKKRRHSSSSPKSKRRDEKRHKKQSRSRPRKSHRHRHHRCPSRSQSSESRPSSCESRHRGRSPEEGQKSRRRHSRRCSKTLCKDSPEAQSSRPPSQPLQM	TTS S S	55.57,52.66,53.56,50.29,59.47,53.18,47.65,45.44,47.4,47.32,39.17,42.29,42.5,43.19,48.04,51.39,42.02,42.77,47.45,45.01,46.06,41.93,47.99,45.32,43.77,47.79,41.57,40.61,37.49,43.7,41.91,46.84,50.64,55.11,46.64,43.24,49.58,45.84,37.32,40.18,39.55,41.38,39.78,48.07,37.96,47.16,42.31,42.62,53.12,42.34,45.74,47.45,48.11,45.03,47.54,49.44,49.12,44.81,44.14,44.99,49.52,52.58,45.72,50.25,65.63,50.37,59.03,…	45.98	KLGQHLATEPLGTNSWERDKTCRELGATRGHSASHDKDLTPPPSSRGKKK	KKKSTRKKRRRSSSYSPSPVKKKKKKSSKKHKRRRSFSKKRRHSSSSPKS
A7MD48	A7MD48_p_2_1	6	132	137	K	A7MD48_1	211	38	248	0.406	0.406	KKKKKK		56.1,52.24,51.61,51.32,52.2,50.2	51.905	ARKPLPRTEPQNNPVVPAQDGPSEKLGQHLATEPLGTNSWERDKTCRELGATRGHSASHDKDLTPPPSSRGKKKKKKSTRKKRRRSSSYSPSPVKKKKKKSSKKHKRRRSFSKKRRHSSSSPKSKRRDEKRHKKQSRSRPRKSHRHRHHRCPSRSQSSESRPSSCESRHRGRSPEEGQKSRRRHSRRCSKTLCKDSPEAQSSRPPSQPLQM	TTS S S	55.57,52.66,53.56,50.29,59.47,53.18,47.65,45.44,47.4,47.32,39.17,42.29,42.5,43.19,48.04,51.39,42.02,42.77,47.45,45.01,46.06,41.93,47.99,45.32,43.77,47.79,41.57,40.61,37.49,43.7,41.91,46.84,50.64,55.11,46.64,43.24,49.58,45.84,37.32,40.18,39.55,41.38,39.78,48.07,37.96,47.16,42.31,42.62,53.12,42.34,45.74,47.45,48.11,45.03,47.54,49.44,49.12,44.81,44.14,44.99,49.52,52.58,45.72,50.25,65.63,50.37,59.03,…	45.98	ELGATRGHSASHDKDLTPPPSSRGKKKKKKSTRKKRRRSSSYSPSPVKKK	KKKSSKKHKRRRSFSKKRRHSSSSPKSKRRDEKRHKKQSRSRPRKSHRHR		S
A7MD48	A7MD48_p_3_1	6	567	572	S	A7MD48_2	349	263	611	0.51	0.51	SSSSSS		31.03,34.44,33.39,35.24,36.56,36.38	34.84	SAADLFTKTASPLTTSRGRSQEYDSGNDTSSPPSTQTSSARSRGQEKGSPSGGLSKSRELNSGNTSDSGNSFTTSSPQNKGAMLENLSPTSRGRESRGFQSPCLECAEVKKSSLVPSTARSSPMKGCSRSSSYASTRSSSHSSRSPNPRASPRYTQSRSTSSEKRSYSRSPSYSSKSGKRSPPSRSSRSRRSPSYSRYSPSRERDPKYSEKDSQQRERERARRRRRSYSPMRKRRRDSPSHLEARRITSARKRPIPYYRPSPSSSGSLSSTSSWYSSSSSRSASRSYSRSRSRSRSRRRSRTRTSSSSSSRSPSPGSRSRSRSRSRSRSRSRSQSRSYSSADSYSSTRR	S HHHHHHHHHHHHHHHHHT TT TT TTSSSSS S	40.63,39.91,48.56,44.19,56.1,51.5,48.54,46.48,43.98,43.83,44.7,48.53,41.72,43.34,44.41,46.26,40.99,42.64,39.5,54.51,48.89,51.55,51.98,64.31,51.25,59.4,47.23,58.75,56.68,45.3,52.41,68.97,60.15,51.48,53.82,55.16,41.55,47.85,40.45,45.25,40.8,53.18,44.23,44.9,45.95,45.09,43.94,40.23,43.42,44.65,43.16,39.7,39.86,47.68,39.84,40.64,41.25,40.93,39.87,48.12,44.74,42.92,40.53,43.98,41.97,44.62,46.62,50.97,…	43.41	YRPSPSSSGSLSSTSSWYSSSSSRSASRSYSRSRSRSRSRRRSRTRTSSS	SSSRSPSPGSRSRSRSRSRSRSRSRSQSRSYSSADSYSSTRR||||||||	S	||||||||
A7XYQ1	A7XYQ1_p_1_1	7	745	751	P	A7XYQ1_5	42	730	771	0.704	0.704	PPPPPPP		66.6,70.1,73.92,75.7,78.06,75.8,71.69	73.92	AAAEGAKSAEPPPEQPPPPPPPAPPKKLLSPEEPAVSELESV		35.81,37.98,40.65,42.93,40.09,43.09,44.88,41.14,44.92,37.95,57.24,58.83,59.2,52.14,52.1,66.6,70.1,73.92,75.7,78.06,75.8,71.69,69.28,65.78,54.12,57.93,40.94,37.98,45.76,38.27,41.72,48.7,38.61,41.52,38.28,40.57,41.13,37.09,44.23,41.43,42.17,35.8	43.66	CSPPAAGDPGPGAPAGPEAAAACNVIVNGTRGAAAEGAKSAEPPPEQPPP	PPPPAPPKKLLSPEEPAVSELESVKENNCASNCHLDGEAAKKLMGEEALA
A8K0Z3	A8K0Z3_p_1_1	10	303	312	P	A8K0Z3_1	63	297	359	0.766	0.766	PPPPPPPPPP		54.34,58.67,61.86,66.94,67.75,70.27,69.92,66.72,70.66,67.19	67.065	QDGVLTPPPPPPPPPPAPEVLASAPPLPPSTAAPVGQGARQDDSSSSASPSVQGAPREVVDPS	S TT	40.64,38.47,35.95,38.44,34.97,44.04,54.34,58.67,61.86,66.94,67.75,70.27,69.92,66.72,70.66,67.19,54.34,42.19,44.33,38.05,44.67,37.47,41.69,39.83,43.58,54.77,45.36,47.57,47.34,42.23,36.91,41.87,41.93,44.02,39.5,39.77,41.12,36.24,35.95,41.74,41.73,41.43,40.2,40.61,39.31,35.34,39.73,37.69,40.08,37.52,33.74,41.21,36.12,39.61,38.29,45.13,52.29,48.39,49.3,56.31,46.36,54.85,58.04	41.87	NDLMYSADLGPGIAPSAPGTIPELPTFHTEVAEPLKVDLQDGVLTPPPPP	PPPPPAPEVLASAPPLPPSTAAPVGQGARQDDSSSSASPSVQGAPREVVD	TT S TT	S
A8MV65	A8MV65_p_1_1	7	68	74	E	A8MV65_1	24	57	80	0.34	0.34	EEEEEEE	SSSSSST	46.45,46.65,46.43,48.64,50.46,50.84,53.47	48.64	VTLPSKQEEEDEEEEEEEKDQPAE	SSSSSSSSSTT E	40.14,47.96,41.49,42.78,38.14,35.85,36.2,40.34,42.59,42.66,43.21,46.45,46.65,46.43,48.64,50.46,50.84,53.47,47.85,56.03,53.41,61.34,73.9,83.49	46.55	NPMAATTCPTAYYQPAPQPGQQKKLAVFSKMQDSLEVTLPSKQEEEDEEE	EEEEKDQPAEMEYLNSRCVLFTYFQGDIGSVVDEHFSRALGQAITLHPES	SSSSSS	SSSTT EEEEEETTEEEEE S HHHHHHHHHHHHHHHHHT S
A8MV65	A8MV65_p_2_1	7	242	248	H	A8MV65_3	24	233	256	0.451	0.451	HHHHHHH		48.39,51.11,51.52,44.51,50.54,45.83,45.37	48.39	HAHMHHRHRHHHHHHHPPAGSALD		46.26,43.23,49.83,49.17,45.8,45.17,46.77,49.2,47.08,48.39,51.11,51.52,44.51,50.54,45.83,45.37,53.57,49.47,46.08,41.33,42.96,44.78,52.44,43.01	46.515	TGPAPPPAVSESWPYPLTSQVSPSYSHMHDVYMRHHHPHAHMHHRHRHHH	HHHHPPAGSALDPSYGPLLMPSVHAARIPAPQCDITKTEPTTVTSATSAW	SSS S	TT
A8MVW0	A8MVW0_p_1_1	6	596	601	G	A8MVW0_4	57	554	610	0.682	0.682	GGGGGG		35.21,31.74,30.01,28.18,27.84,26.95	29.095	GAAGVGDEPAPPEGTAPGPARAFPQPDPQRPQMPGHSGPGGEGGGGGGEGWGAGRAA		28.05,29.11,33.34,34.11,35.15,34.38,37.53,35.84,37.16,34.76,39.19,43.04,35.99,40.09,37.91,38.83,39.55,32.4,39.28,29.88,33.57,32.65,28.84,33.77,28.66,39.14,32.46,38.21,36.44,33.35,35.71,37.41,35.14,39.41,33.77,35.76,35.99,30.85,41.46,33.93,35.82,34.95,35.21,31.74,30.01,28.18,27.84,26.95,29.54,29.08,30.46,25.52,26.97,29.61,26.19,29.94,28.37	33.93	LGGEAGAAGVGDEPAPPEGTAPGPARAFPQPDPQRPQMPGHSGPGGEGGG	GGGEGWGAGRAAPVSGSVTIPVLFNESTMAQLNGELQALTEKKLLELGVK		TTGGGTHHHHHHHHHHHHHHHTT
A8MW92	A8MW92_p_2_1	9	569	577	K	A8MW92_4	113	473	585	0.493	0.493	KKKKKKKKK		38.25,35.69,39.21,38.66,40.01,39.46,37.52,40.15,34.87	38.66	LPLDLSRGSEVTAPVASDSSYRNECPRAEKEDTQMLPNPSSKAIADGRGAPAAAGISKTEKKVKLEDKSSTAFGKRKEKDKERREKRDKDHYRPKQKKKKKKKKKSKQHDYSD		38.28,36.05,32.89,32.25,30.73,33.34,36.23,36.33,36.36,36.74,38.73,36.32,37.3,40.16,38.58,34.9,35.46,36.74,35.84,32.75,32.92,30.24,26.63,31.04,26.94,36.47,28.25,33.62,31.59,39.86,34.39,36.78,34.12,32.19,31.9,30.57,34.95,28.6,37.9,30.84,35.43,33.11,30.89,30.98,35.87,34.15,38.1,34.99,33.04,31.65,41.47,28.72,30.17,30.86,33.01,35.41,41.98,37.06,41.77,35.74,44.59,36.02,40.03,34.88,35.08,31.58,34.66,33.…	35.84	PAAAGISKTEKKVKLEDKSSTAFGKRKEKDKERREKRDKDHYRPKQKKKK	KKKKKSKQHDYSDYEDSSLEFLERCSSPLTRSSGSSLASRSMFTEKTTTY		SSSTTS S
A8MWX3	A8MWX3_p_1_1	10	316	325	P	A8MWX3_1	111	310	420	0.699	0.699	PPPPPPPPPP		54.02,62.89,71.75,69.49,66.2,71.38,71.65,67.68,68.94,65.3	68.31	QDGVLTPPPPPPPPPPAPEVLASAPPLPPSTAAPVGQGARQDDSSSSASPSVQGAPREVVDPSGGWATLLESIRQAGGIGKAKLRSMKERKLEKQQQKEQEQVRATSQGGH	S S TTTHHHHHHHHHHHH TTTTS HHHHHHHHHHHHHHHTTT SS	38.91,42.35,35.84,35.3,40.47,44.51,54.02,62.89,71.75,69.49,66.2,71.38,71.65,67.68,68.94,65.3,54.08,54.07,42.73,44.86,41.58,41.03,38.77,42.83,60.96,52.63,50.03,61.7,52.01,46.06,41.08,44.99,44.77,37.39,44.23,36.99,34.17,34.61,33.34,40.6,34.69,37.49,40.16,37.8,40.98,35.83,42.29,36.79,35.25,39.26,33.91,41.97,34.3,35.75,37.62,47.03,53.53,53.49,46.85,56.0,48.89,54.74,55.02,57.46,75.85,74.48,79.82,84.54…	54.07	NDLMYIADLGPGIAPSAPGTIPELPTFHTEVAEPLKVDLQDGVLTPPPPP	PPPPPAPEVLASAPPLPPSTAAPVGQGARQDDSSSSASPSVQGAPREVVD	TT S SSTTSSS S	S
B1AK53	B1AK53_p_1_1	6	430	435	P	B1AK53_2	60	415	474	0.683	0.683	PPPPPP		51.03,59.12,58.32,65.3,61.49,55.02	58.72	NPELGLPRGTIGKPTPPPPPPSFPPPPPPPGTQLPPPPPGYPAPKPPVGPQAADIYMQTK	TT TT SS HHHHHHHHH	52.44,48.22,42.39,43.52,35.53,36.92,42.19,34.14,33.81,32.27,36.67,34.74,37.0,40.89,39.25,51.03,59.12,58.32,65.3,61.49,55.02,48.59,55.96,70.77,62.13,68.21,72.93,67.54,65.14,54.37,52.87,44.15,52.25,52.1,60.48,68.11,65.37,60.6,58.25,46.06,50.84,64.1,48.92,52.94,54.09,53.45,50.84,46.67,57.06,52.17,50.2,48.08,53.46,58.13,61.44,55.01,61.74,60.51,54.41,52.19	52.905	CSSSHSSIKGQHPPCGLSSARAADIQSYMDMLNPELGLPRGTIGKPTPPP	PPPSFPPPPPPPGTQLPPPPPGYPAPKPPVGPQAADIYMQTKNKLRHVET	HHHHHHHHHHHHHH TT	TT SS HHHHHHHHHHHTT
B1AK53	B1AK53_p_2_1	7	438	444	P	B1AK53_2	60	415	474	0.683	0.683	PPPPPPP	T	70.77,62.13,68.21,72.93,67.54,65.14,54.37	67.54	NPELGLPRGTIGKPTPPPPPPSFPPPPPPPGTQLPPPPPGYPAPKPPVGPQAADIYMQTK	TT TT SS HHHHHHHHH	52.44,48.22,42.39,43.52,35.53,36.92,42.19,34.14,33.81,32.27,36.67,34.74,37.0,40.89,39.25,51.03,59.12,58.32,65.3,61.49,55.02,48.59,55.96,70.77,62.13,68.21,72.93,67.54,65.14,54.37,52.87,44.15,52.25,52.1,60.48,68.11,65.37,60.6,58.25,46.06,50.84,64.1,48.92,52.94,54.09,53.45,50.84,46.67,57.06,52.17,50.2,48.08,53.46,58.13,61.44,55.01,61.74,60.51,54.41,52.19	52.905	KGQHPPCGLSSARAADIQSYMDMLNPELGLPRGTIGKPTPPPPPPSFPPP	PPPPGTQLPPPPPGYPAPKPPVGPQAADIYMQTKNKLRHVETEALKKELS	HHHHHHHHHHHHHH TT	TT SS HHHHHHHHHHHTT
B1AK53	B1AK53_p_3_1	10	596	605	P	B1AK53_3	227	487	713	0.726	0.726	PPPPPPPPPP		51.14,63.93,58.6,62.35,70.3,65.32,62.9,68.65,64.26,43.36	63.415	KELSSCDGHDGLRRQDSSRKPRAFSKQPSTGDYYRQLGRCPGETLAARPGMAHSEEVRARQPARAGCPRLGPAARGSLEGPSAPPQAALLPGNHVPNGCAADPKASRELPPPPPPPPPPLPEAASSPPPAPPLPLESAGPGCGQRRSSSSTGSTKSFNMMSPTGDNSELLAEIKAGKSLKPTPQSKGLTTVFSGIGQPAFQPDSPLPSVSPALSPVRSPTPPAAGFQ	SS SS TTHHHHHTT TT TT HHHHHHHHHGGG S	32.47,28.3,27.22,30.2,27.1,29.35,26.29,30.73,29.45,28.69,31.57,40.04,38.72,50.95,46.2,50.38,52.97,56.63,59.97,56.66,53.74,63.47,41.33,45.27,32.47,33.7,30.24,27.2,30.85,32.77,35.19,34.98,38.92,46.02,42.28,43.14,50.66,38.03,31.45,31.65,31.16,36.02,28.03,26.19,30.22,29.35,26.33,27.44,27.09,27.91,30.92,29.51,30.92,29.68,32.93,28.34,34.5,32.05,31.46,34.36,34.2,36.14,31.95,35.03,36.69,36.79,33.87,39.67…	36.81	AGCPRLGPAARGSLEGPSAPPQAALLPGNHVPNGCAADPKASRELPPPPP	PPPPPLPEAASSPPPAPPLPLESAGPGCGQRRSSSSTGSTKSFNMMSPTG		TT
B1AL46	B1AL46_p_1_1	6	280	285	P	B1AL46_1	52	273	324	0.757	0.757	PPPPPP		55.06,60.19,60.34,57.42,55.37,43.66	56.395	WSQGLPLPPPPPPAAQLPPIVSQGNAGPWPQGAHGESSLASSQAKAPPDDSC	TT	32.58,34.57,34.32,31.56,35.89,46.8,43.46,55.06,60.19,60.34,57.42,55.37,43.66,45.41,38.55,33.68,38.61,36.44,33.33,32.99,34.71,34.54,35.23,32.27,36.16,35.22,33.53,40.6,30.83,45.19,36.1,37.46,36.85,39.2,37.54,35.01,30.2,30.82,34.47,33.25,35.07,34.02,35.12,34.43,36.57,37.19,37.39,42.09,38.41,34.06,34.28,32.53	35.56	APGALCGGVVCPPPLLLAAAPVVPVMAAQVVGGTQACEGGWSQGLPLPPP	PPPAAQLPPIVSQGNAGPWPQGAHGESSLASSQAKAPPDDSCNPRSVYEN		TT HHHHHHH
B1AL88	B1AL88_p_1_1	9	78	86	Q	B1AL88_1	86	70	155	0.463	0.463	QQQQQQQQQ	HHHHHHHHH	86.51,87.63,87.87,88.49,89.15,89.83,88.88,89.85,89.42	88.88	KEHQQQQRQQQQQQQQQRQRQQQQQQRRQQEPSWPALLASMGESSPAAQAHRLLSASSSPTLPPSPGDGGGGGGKGNRGKDDRGKA	HHHHHHHHHHHHHHHHHHHHHHHHHHHHHS S S	78.76,78.69,78.35,81.83,82.76,84.1,86.09,86.62,86.51,87.63,87.87,88.49,89.15,89.83,88.88,89.85,89.42,89.18,88.23,87.8,86.92,85.56,85.22,83.65,81.33,78.08,73.27,67.34,61.56,53.84,45.52,45.98,45.34,34.71,44.23,40.89,38.41,45.78,41.99,35.95,35.94,33.16,34.25,36.89,39.56,48.12,35.47,36.61,37.55,36.53,38.64,35.16,36.91,34.72,32.86,32.08,32.98,35.25,36.7,48.25,34.75,42.67,63.77,56.09,51.85,58.93,51.19,…	45.43	SERAQKWRLSLASLLFFTVLLSDHLWFCAEAKLTRARDKEHQQQQRQQQQ	QQQQQRQRQQQQQQRRQQEPSWPALLASMGESSPAAQAHRLLSASSSPTL	HHHHHHHHHHHHHHHHHHHHHHHHHHHHHHHHHHHHHHHHHHHHHHHHHH	HHHHHHHHHHHHHHHHHS S S
B1AL88	B1AL88_p_2_1	6	90	95	Q	B1AL88_1	86	70	155	0.463	0.463	QQQQQQ	HHHHHH	86.92,85.56,85.22,83.65,81.33,78.08	84.435	KEHQQQQRQQQQQQQQQRQRQQQQQQRRQQEPSWPALLASMGESSPAAQAHRLLSASSSPTLPPSPGDGGGGGGKGNRGKDDRGKA	HHHHHHHHHHHHHHHHHHHHHHHHHHHHHS S S	78.76,78.69,78.35,81.83,82.76,84.1,86.09,86.62,86.51,87.63,87.87,88.49,89.15,89.83,88.88,89.85,89.42,89.18,88.23,87.8,86.92,85.56,85.22,83.65,81.33,78.08,73.27,67.34,61.56,53.84,45.52,45.98,45.34,34.71,44.23,40.89,38.41,45.78,41.99,35.95,35.94,33.16,34.25,36.89,39.56,48.12,35.47,36.61,37.55,36.53,38.64,35.16,36.91,34.72,32.86,32.08,32.98,35.25,36.7,48.25,34.75,42.67,63.77,56.09,51.85,58.93,51.19,…	45.43	ASLLFFTVLLSDHLWFCAEAKLTRARDKEHQQQQRQQQQQQQQQRQRQQQ	QQQRRQQEPSWPALLASMGESSPAAQAHRLLSASSSPTLPPSPGDGGGGG	HHHHHHHHHHHHHHHHHHHHHHHHHHHHHHHHHHHHHHHHHHHHHHHHHH	HHHHHHS S S
B1AL88	B1AL88_p_3_1	6	138	143	G	B1AL88_1	86	70	155	0.463	0.463	GGGGGG		48.28,46.06,41.57,42.81,37.75,39.69	42.19	KEHQQQQRQQQQQQQQQRQRQQQQQQRRQQEPSWPALLASMGESSPAAQAHRLLSASSSPTLPPSPGDGGGGGGKGNRGKDDRGKA	HHHHHHHHHHHHHHHHHHHHHHHHHHHHHS S S	78.76,78.69,78.35,81.83,82.76,84.1,86.09,86.62,86.51,87.63,87.87,88.49,89.15,89.83,88.88,89.85,89.42,89.18,88.23,87.8,86.92,85.56,85.22,83.65,81.33,78.08,73.27,67.34,61.56,53.84,45.52,45.98,45.34,34.71,44.23,40.89,38.41,45.78,41.99,35.95,35.94,33.16,34.25,36.89,39.56,48.12,35.47,36.61,37.55,36.53,38.64,35.16,36.91,34.72,32.86,32.08,32.98,35.25,36.7,48.25,34.75,42.67,63.77,56.09,51.85,58.93,51.19,…	45.43	QQQQQRRQQEPSWPALLASMGESSPAAQAHRLLSASSSPTLPPSPGDGGG	GGGKGNRGKDDRGKALFLGNSAKPVWRLETCYPQGASSGQCFTVENADAV	HHHHHHHHS S S	B SSTT TTS EE HHHH
B2RXF0	B2RXF0_p_1_1	12	189	200	Q	B2RXF0_2	49	188	236	0.495	0.495	QQQQQQQQQQQQ	HHHHHHHHHHHH	56.48,60.17,60.81,62.84,67.06,67.69,68.64,70.5,70.78,71.4,70.13,69.2	68.165	RQQQQQQQQQQQQRRGALPVPPGARVPTAAGARRRRPRGPRGAGGAPSQ	HHHHHHHHHHHHHHHHS TT	54.78,56.48,60.17,60.81,62.84,67.06,67.69,68.64,70.5,70.78,71.4,70.13,69.2,63.75,65.49,65.71,54.51,55.19,57.16,54.77,58.35,54.47,56.26,51.14,50.58,53.92,48.08,43.04,47.51,48.95,44.27,45.19,42.88,45.91,43.66,43.69,46.27,43.62,41.15,42.38,36.51,34.74,31.93,28.99,28.57,31.89,36.72,47.53,60.77	53.92	GGGAGVAVAPGALDLALQYVLALYHCQVFLKRFLRLRYGRQRRRQQQQQQ	QQQQQQRRGALPVPPGARVPTAAGARRRRPRGPRGAGGAPSQGLPDLPRF	T GGG HHHHHHHHHHHHHIIIIIIHHHTTEEE THHHHHHHHHH	HHHHHHHHHS TT SS HHHHH
B3KS81	B3KS81_p_1_1	6	707	712	S	B3KS81_1	715	1	715	0.438	0.438	SSSSSS		42.43,43.85,42.25,42.43,45.13,46.94	43.14	MSSPKRSSKPSMSLAPSGSSMPTADPKPPASLKSTKSATPNRSLVPTKPATSRNSVMSPSSSKSTKSTSTKRAPSNRPSSRSRVRSKARTPSRVSTDTRTSKASKASDVRCHQRRGTHSRGRTPGRRGSRSSKRSPSRASTPGRIRTHGARPGMASRVRTPTSQQKGSRGKSYGRPRTSNRERSDSQPRNLSKKSYRPPGGSGIGRSSELAVTPSTAKCQTPTGIPSKEKSDNPSPSSSRKVKSYGQMIIPSREKSYSPTEMSSRVKSYNQASTRSRPQSHSQSRSPRRSRSGSQKRTHSRVRSHSWKRNHSRARSRTRKGILSQMGRHSQSRSHSKGKSQNQSRTPRRGRSHNWSRNPSKERSHSHSRSSSKERDHRGSSSPRKESGRSQSGSPNKQR…		53.18,41.54,52.35,55.54,50.17,44.58,44.62,46.41,46.91,46.84,47.55,46.93,39.82,50.25,48.42,48.4,35.64,50.68,45.7,43.63,58.72,53.84,49.23,47.27,50.53,48.18,59.96,53.37,53.57,55.41,47.48,49.47,50.4,49.86,46.82,45.27,40.86,41.64,45.85,46.7,45.74,44.2,40.6,48.75,50.93,53.9,48.18,46.99,50.08,44.55,40.32,45.74,43.81,48.84,41.04,47.36,47.49,40.12,58.27,41.83,46.43,48.02,46.36,44.43,46.34,41.7,41.58,45.82…	41.33	SSLSQNRTPSKTSSHSPSTFPSGGQTLSQDDSQADATTSKATLPGERSSS	SSSKLA||||||||||||||||||||||||||||||||||||||||||||		||||||||||||||||||||||||||||||||||||||||||||
B3KU38	B3KU38_p_1_1	6	112	117	S	B3KU38_1	88	63	150	0.709	0.709	SSSSSS		38.77,41.86,39.5,39.93,39.94,39.41	39.715	RQEPLGKRSPSPPSVSSEKLSSSVSMNTFSDSSTPDYREDGMDLGSDAGSSSSSSRASSQSNSTKVTPCSECKSSSSPGGSLDLVSAL	HHS S SSTTS	77.26,59.06,45.54,45.43,45.31,39.29,40.6,38.57,42.98,46.71,44.27,53.78,40.13,45.33,37.74,41.42,47.62,42.75,49.75,55.19,43.98,43.42,46.89,43.11,47.77,47.85,47.72,45.5,46.34,43.12,43.7,40.16,48.28,41.86,59.21,37.41,47.78,48.93,52.36,56.09,52.26,59.17,55.03,52.26,45.6,49.34,42.62,43.52,42.73,38.77,41.86,39.5,39.93,39.94,39.41,40.93,37.82,42.98,38.67,46.22,38.18,45.8,39.12,47.88,41.0,49.42,47.48,38.1…	43.47	EPLGKRSPSPPSVSSEKLSSSVSMNTFSDSSTPDYREDGMDLGSDAGSSS	SSSRASSQSNSTKVTPCSECKSSSSPGGSLDLVSALEDYEEPFPVYQKKV	S S	SSTTSTT HHHHHH
B3KU38	B3KU38_p_2_1	6	175	180	E	B3KU38_2	132	164	295	0.597	0.597	EEEEEE		34.86,36.98,39.5,35.25,41.41,41.56	38.24	VIDEWAPEEDGEEEEEEDERDQRGYRDDRSPAREPGDVSARTRSGGGGGRSATTAMPPPVPNGNLHQHDPQDLRHNGNVVVAGRPSCSRGPRRAIQKPQPAGGRRSGRGPAAGGLCLQPPDGGTCVPEEPPV	HHHTTS	44.97,49.68,48.91,50.73,42.42,39.96,43.8,49.2,46.99,39.36,38.96,34.86,36.98,39.5,35.25,41.41,41.56,36.47,42.72,40.5,42.51,41.05,40.93,38.85,39.78,42.04,42.01,42.47,40.89,39.31,49.81,37.37,41.5,37.26,47.88,44.86,36.63,47.96,38.39,37.24,34.78,35.08,34.29,39.12,37.3,36.85,39.09,39.02,41.74,45.14,42.25,38.4,41.0,39.09,33.29,51.27,55.81,58.04,60.35,59.07,45.33,40.78,39.81,33.55,39.34,38.94,33.85,39.19…	41.45	VTPCSECKSSSSPGGSLDLVSALEDYEEPFPVYQKKVIDEWAPEEDGEEE	EEEDERDQRGYRDDRSPAREPGDVSARTRSGGGGGRSATTAMPPPVPNGN	SSTTSTT HHHHHHHHTTS
C4AMC7	C4AMC7_p_1_1	10	301	310	P	C4AMC7_1	169	295	463	0.695	0.695	PPPPPPPPPP		58.56,64.54,66.84,72.73,70.14,70.33,72.9,73.32,71.65,63.26	70.235	QDGVLTPPPPPPPPPPAPEVLASAPPLPPSTAAPVGQGARQDDSSSSASPSVQGAPREVVDPSGGRATLLESIRQAGGIGKAKLRSMKERKLEKKQQKEQEQVRATSQGGHLMSDLFNKLVMRRKGISGKGPGAGEGPGGAFARVSDSIPPLPPPQQPQAEEDEDDWES	S STTS TTHHHHHHHHHHHHH TTTS HHHHHHHHHHHHHHHHHHTTSS HHHHHHHHHHHHHHHHTT S S HHHHHHTTS	36.94,39.9,36.61,36.75,40.53,44.09,58.56,64.54,66.84,72.73,70.14,70.33,72.9,73.32,71.65,63.26,59.53,53.68,40.06,46.17,42.27,41.65,40.37,44.98,58.92,45.86,43.83,53.17,42.71,45.18,43.8,36.02,39.58,41.9,37.41,43.56,37.0,42.17,36.08,42.7,39.85,40.79,39.51,40.92,38.0,38.59,35.11,36.64,42.51,36.64,41.47,41.57,35.52,41.08,38.1,45.62,57.74,54.52,52.83,57.13,49.65,55.0,55.42,58.91,66.44,71.76,75.1,80.47,8…	56.01	NDLMYIADLGPGIAPSAPGTIPELPTFHTEVAEPLKVDLQDGVLTPPPPP	PPPPPAPEVLASAPPLPPSTAAPVGQGARQDDSSSSASPSVQGAPREVVD	TT SS S TTS S	S STTS
C9JE40	C9JE40_p_1_1	7	35	41	E	C9JE40_1	37	24	60	0.322	0.322	EEEEEEE		28.82,35.66,33.47,28.74,30.92,29.48,31.32	30.92	CQLEKEEENEGEEEEEEEDEEDLDPDLDPDLEEEEND		27.48,30.18,34.57,33.28,28.34,32.93,33.56,34.09,35.48,33.1,32.74,28.82,35.66,33.47,28.74,30.92,29.48,31.32,31.65,32.99,34.36,34.17,36.06,31.24,45.25,34.15,37.23,33.9,35.42,34.51,32.8,33.93,30.99,34.63,34.29,32.36,31.52	33.28	|||||||||||||MNCLEGPGKTCGPLASEEELVSACQLEKEEENEGEEE	EEEEDEEDLDPDLDPDLEEEENDLGDPAVLGAVHNTQRALLSSPGVKAPG	|||||||||||||	SSSSS S S
C9JLR9	C9JLR9_p_1_1	13	188	200	E	C9JLR9_2	69	182	250	0.602	0.602	EEEEEEEEEEEEE		29.8,32.85,30.45,30.16,28.61,28.89,28.05,25.78,26.43,30.34,36.32,34.81,30.15	30.15	LGVQGAEEEEEEEEEEEEEGAGVPACPPKGPGKAPAGGGCRRQRRGGPVAPRARRLRLSASRRAGGSRG	TTSHHH	34.88,25.58,32.99,28.05,25.6,33.57,29.8,32.85,30.45,30.16,28.61,28.89,28.05,25.78,26.43,30.34,36.32,34.81,30.15,33.33,32.13,28.69,29.83,35.51,26.15,26.93,36.29,38.63,36.57,28.17,38.72,32.62,34.32,29.11,42.1,34.35,33.31,30.81,33.13,26.07,34.42,35.22,33.73,39.41,34.79,30.31,32.22,36.57,39.2,35.29,38.01,39.16,39.55,38.59,37.74,38.08,35.53,38.39,39.44,37.66,39.43,40.15,41.43,44.64,43.08,44.34,52.81,5…	34.42	HIRQKHPYSLHWSPREKEVISNSWDAHLGLGACGEAEGLGVQGAEEEEEE	EEEEEEEGAGVPACPPKGPGKAPAGGGCRRQRRGGPVAPRARRLRLSASR	HHHHH GGGGG HHHHHHHHHHHHHHTTGGGSS
C9JLR9	C9JLR9_p_2_1	6	522	527	E	C9JLR9_4	94	490	583	0.512	0.512	EEEEEE		33.14,28.12,32.03,27.97,33.45,30.81	31.42	LGPPRPESPQGPIPPGTAAASDEGGGDEEEEPEEEEEEWGDVPLSPGAPLERPAEEEEDEEDGQEPGGLALPPPPPPPPPPPPRSREQRRNYQP	T S TTS TT T	64.1,45.53,49.9,41.92,38.49,41.04,39.94,39.3,45.91,39.54,34.23,41.11,34.22,36.74,36.0,34.81,32.57,34.78,36.14,34.63,44.28,34.76,44.96,30.76,32.69,29.82,36.52,32.23,32.82,32.62,27.94,33.97,33.14,28.12,32.03,27.97,33.45,30.81,31.81,31.57,29.21,34.58,37.52,35.72,31.38,40.89,29.04,31.94,36.47,31.25,31.11,31.93,30.89,33.88,35.31,33.6,31.71,37.01,36.2,36.39,36.79,40.49,32.65,39.46,31.28,41.77,37.82,33.…	36.765	LIAREWSEKAAHLLALGPPRPESPQGPIPPGTAAASDEGGGDEEEEPEEE	EEEWGDVPLSPGAPLERPAEEEEDEEDGQEPGGLALPPPPPPPPPPPPRS	HHHHHHHHHHHHHHHT S
C9JLR9	C9JLR9_p_3_1	12	561	572	P	C9JLR9_4	94	490	583	0.512	0.512	PPPPPPPPPPPP		49.48,51.73,55.25,58.71,61.73,59.94,59.83,56.33,47.5,47.59,39.17,39.32	53.49	LGPPRPESPQGPIPPGTAAASDEGGGDEEEEPEEEEEEWGDVPLSPGAPLERPAEEEEDEEDGQEPGGLALPPPPPPPPPPPPRSREQRRNYQP	T S TTS TT T	64.1,45.53,49.9,41.92,38.49,41.04,39.94,39.3,45.91,39.54,34.23,41.11,34.22,36.74,36.0,34.81,32.57,34.78,36.14,34.63,44.28,34.76,44.96,30.76,32.69,29.82,36.52,32.23,32.82,32.62,27.94,33.97,33.14,28.12,32.03,27.97,33.45,30.81,31.81,31.57,29.21,34.58,37.52,35.72,31.38,40.89,29.04,31.94,36.47,31.25,31.11,31.93,30.89,33.88,35.31,33.6,31.71,37.01,36.2,36.39,36.79,40.49,32.65,39.46,31.28,41.77,37.82,33.…	36.765	EEEEPEEEEEEWGDVPLSPGAPLERPAEEEEDEEDGQEPGGLALPPPPPP	PPPPPPRSREQRRNYQPRWRGEYLMDYDGSRRGLVCMVCGGALATLKVST		TTS TT THHHHHH EEEETTTTEEEETTT EESS HHH
C9JSJ3	C9JSJ3_p_1_1	13	453	465	S	C9JSJ3_5	91	447	537	0.604	0.604	SSSSSSSSSSSSS		36.31,30.18,34.77,33.53,35.34,35.54,38.88,41.62,40.24,42.69,41.09,42.74,44.15	38.88	GNSKAPSSSSSSSSSSSSSEDSDSEPLWKQREDMQANPVGTPGSSEEDEDTTWTPTRLASPLLAAEKKATKGQVARAPVKPKEKKKGPCPP		36.7,34.88,39.25,36.25,37.91,44.22,36.31,30.18,34.77,33.53,35.34,35.54,38.88,41.62,40.24,42.69,41.09,42.74,44.15,54.1,37.83,55.59,39.62,42.56,41.69,44.95,38.08,37.48,37.88,33.79,35.16,37.4,37.15,40.27,37.59,38.01,39.03,54.98,40.88,33.73,44.09,42.63,29.47,38.31,46.03,45.3,55.69,50.3,48.01,46.52,43.76,40.82,45.52,32.74,42.51,36.39,39.56,39.94,35.18,33.55,38.21,40.84,40.04,36.72,40.76,42.64,45.3,42.…	41.09	QEAPQEKDTASKAPKDPPESHSLHRSSVSLDHCYLSLSGNSKAPSSSSSS	SSSSSSSEDSDSEPLWKQREDMQANPVGTPGSSEEDEDTTWTPTRLASPL
C9JTQ0	C9JTQ0_p_1_1	7	180	186	A	C9JTQ0_1	76	181	256	0.639	0.639	AAAAAAA	HHHHHHH	54.61,53.9,52.51,51.68,50.79,48.43,50.03	51.68	AAAAAARGSNSDSPPGRPAPAASPEHRRPSPRRLPRPLLARFARAAGGHGGEAGSAGKNSGRHRAQGSERPELGRS	HHHHHHHHS SS S	53.9,52.51,51.68,50.79,48.43,50.03,46.75,47.28,49.65,39.84,39.0,35.47,41.39,48.05,42.56,38.0,38.86,37.46,41.48,42.57,39.98,39.86,35.74,37.9,36.26,36.54,34.95,31.61,39.14,42.85,42.68,44.73,48.96,47.62,47.43,49.06,50.04,44.68,44.06,47.81,50.02,44.99,48.46,41.81,45.95,43.93,41.37,41.49,47.48,39.86,41.05,40.79,41.02,40.44,41.76,39.61,43.26,41.99,40.82,39.07,40.36,37.37,43.7,34.9,38.78,34.86,36.3,38.1…	41.285	LEFLVRSFRRLGLRLDRTNRAGLTALQLAAARGHGTCVQALTGPWGRAAA	AAAARGSNSDSPPGRPAPAASPEHRRPSPRRLPRPLLARFARAAGGHGGE	HHHHHHHHTTTT TT B TTS BHHHHHHHTT HHHHHHHHSTTHHHHH	HHHHHHS SS S
D6RIA3	D6RIA3_p_1_1	7	267	273	S	D6RIA3_2	158	204	361	0.632	0.632	SSSSSSS		30.27,34.01,33.79,36.69,34.85,37.28,34.43	34.43	QRESPQTMKLTLGHCPGGQRASRSPKEKAQDEPSSKTPSPQNNPASSQLSRSQHSASEEGGNFSSSSSSSPMNKAEEDGLSKMEDSTTSTGALATSSSSLGFESESGESEGCQAVGGEGEKISGGGGGGKGGGGGGAGDGTECRDIIAKSQGSRDPPK		38.36,35.41,40.63,40.68,43.44,38.66,37.24,38.47,41.04,37.06,36.01,31.79,29.31,33.87,39.3,41.91,31.09,31.33,34.47,34.46,36.76,35.51,38.55,35.24,46.14,32.25,32.35,32.83,33.21,33.09,38.72,33.33,39.28,32.45,33.99,38.4,31.28,38.95,35.02,40.5,34.72,39.25,32.4,43.55,35.09,30.22,31.75,32.51,39.82,29.6,34.03,30.75,34.57,36.28,29.73,35.92,31.25,36.64,37.26,38.06,36.52,28.14,33.65,30.27,34.01,33.79,36.69,34…	35.955	GGQRASRSPKEKAQDEPSSKTPSPQNNPASSQLSRSQHSASEEGGNFSSS	SSSSPMNKAEEDGLSKMEDSTTSTGALATSSSSLGFESESGESEGCQAVG
D6RIA3	D6RIA3_p_2_1	6	327	332	G	D6RIA3_2	158	204	361	0.632	0.632	GGGGGG		41.31,40.98,41.73,42.81,43.48,45.51	42.27	QRESPQTMKLTLGHCPGGQRASRSPKEKAQDEPSSKTPSPQNNPASSQLSRSQHSASEEGGNFSSSSSSSPMNKAEEDGLSKMEDSTTSTGALATSSSSLGFESESGESEGCQAVGGEGEKISGGGGGGKGGGGGGAGDGTECRDIIAKSQGSRDPPK		38.36,35.41,40.63,40.68,43.44,38.66,37.24,38.47,41.04,37.06,36.01,31.79,29.31,33.87,39.3,41.91,31.09,31.33,34.47,34.46,36.76,35.51,38.55,35.24,46.14,32.25,32.35,32.83,33.21,33.09,38.72,33.33,39.28,32.45,33.99,38.4,31.28,38.95,35.02,40.5,34.72,39.25,32.4,43.55,35.09,30.22,31.75,32.51,39.82,29.6,34.03,30.75,34.57,36.28,29.73,35.92,31.25,36.64,37.26,38.06,36.52,28.14,33.65,30.27,34.01,33.79,36.69,34…	35.955	EDGLSKMEDSTTSTGALATSSSSLGFESESGESEGCQAVGGEGEKISGGG	GGGKGGGGGGAGDGTECRDIIAKSQGSRDPPKVEEAHYITTHEIQLSEVE
D6RIA3	D6RIA3_p_3_1	6	334	339	G	D6RIA3_2	158	204	361	0.632	0.632	GGGGGG		43.07,42.26,41.6,42.25,41.64,41.92	42.085	QRESPQTMKLTLGHCPGGQRASRSPKEKAQDEPSSKTPSPQNNPASSQLSRSQHSASEEGGNFSSSSSSSPMNKAEEDGLSKMEDSTTSTGALATSSSSLGFESESGESEGCQAVGGEGEKISGGGGGGKGGGGGGAGDGTECRDIIAKSQGSRDPPK		38.36,35.41,40.63,40.68,43.44,38.66,37.24,38.47,41.04,37.06,36.01,31.79,29.31,33.87,39.3,41.91,31.09,31.33,34.47,34.46,36.76,35.51,38.55,35.24,46.14,32.25,32.35,32.83,33.21,33.09,38.72,33.33,39.28,32.45,33.99,38.4,31.28,38.95,35.02,40.5,34.72,39.25,32.4,43.55,35.09,30.22,31.75,32.51,39.82,29.6,34.03,30.75,34.57,36.28,29.73,35.92,31.25,36.64,37.26,38.06,36.52,28.14,33.65,30.27,34.01,33.79,36.69,34…	35.955	EDSTTSTGALATSSSSLGFESESGESEGCQAVGGEGEKISGGGGGGKGGG	GGGAGDGTECRDIIAKSQGSRDPPKVEEAHYITTHEIQLSEVEQDMDFDV
H3BV60	H3BV60_p_2_1	7	191	197	P	H3BV60_2	77	184	260	0.759	0.759	PPPPPPP	S	56.74,49.55,54.35,52.52,50.22,51.96,58.42	52.52	RAPAPLTPPPPPPPSRCLPQDEACADTGSGSAEGLAADGPHLHTLTQPIVVTVPRPPPRPPKSVPGRAVRPEPPAPA	SS S B HHHHHHHTTSS TT TT EEEEEEEEEE	45.35,45.93,47.57,51.97,53.19,48.47,58.15,56.74,49.55,54.35,52.52,50.22,51.96,58.42,67.63,73.56,77.75,70.71,68.37,69.02,63.68,65.42,67.06,75.1,64.61,56.73,56.86,46.42,40.45,36.51,33.71,37.34,30.82,35.49,46.87,41.79,53.71,60.93,64.29,66.47,77.06,85.21,88.97,91.03,91.11,93.24,93.37,93.31,92.88,91.72,90.1,87.79,76.15,65.59,56.99,54.63,55.21,53.71,50.81,57.84,53.89,51.26,44.24,56.7,49.53,40.02,45.41,…	55.02	PSPGAARPARFSFRLRPVFNASVQFLHCQLSRCRRLRGVRRAPAPLTPPP	PPPPSRCLPQDEACADTGSGSAEGLAADGPHLHTLTQPIVVTVPRPPPRP	TT EEEEEE SS SEEEEEEEEEEEE SS	S B HHHHHHHTTSS TT TT EEEEEEEEEE
I3L3R5	I3L3R5_p_1_1	7	214	220	H	I3L3R5_1	177	90	266	0.467	0.467	HHHHHHH		47.57,47.85,50.43,49.18,50.19,50.1,48.54	49.18	EAGKMRSSQEVRDEEEEEVAERTHKSEVQEQAIRMQGHRQLHQEEDEEEEKEERKRGPMETFEDLWQRHLENGGDLQKRVAEKASDKETAQFQAEEKGVRVLGGDRSLWQGAERGGGERREDLPHHHHHHHQPEAEPRQEKEEASEREEKEVEQLEHLRDELKKVTETLGEQLRREG	TTHHHHHHHHHHHHHHHHHHHHHHHHHHHHHHHHHHHHHHHHHHHHHHH HHHHHHHHHHHHHHHHHHHHHHHTTSSSSSTTS S TTSHHHHHHHHHHHHHHHHHHHHHHHHHHHHHHHHHHHHHHHH	48.83,48.88,52.56,50.77,51.71,56.94,54.35,57.04,62.77,56.83,59.82,61.88,70.22,69.34,71.0,72.99,74.42,74.93,76.55,80.16,80.58,82.19,84.48,87.41,87.26,84.18,89.4,90.09,90.97,90.22,91.72,90.88,91.84,90.62,91.23,91.54,92.77,90.7,87.44,88.75,87.36,85.3,83.97,85.69,83.15,83.76,84.03,83.67,82.9,82.42,82.82,79.71,78.79,77.49,77.69,69.34,68.71,68.17,64.09,70.44,76.93,77.92,82.66,80.43,81.57,79.25,81.89,78…	70.44	KRVAEKASDKETAQFQAEEKGVRVLGGDRSLWQGAERGGGERREDLPHHH	HHHHQPEAEPRQEKEEASEREEKEVEQLEHLRDELKKVTETLGEQLRREG	HHHHHHHTTSSSSSTTS S	TTSHHHHHHHHHHHHHHHHHHHHHHHHHHHHHHHHHHHHHHHH
M0QZC1	M0QZC1_p_1_1	7	39	45	E	M0QZC1_1	55	1	55	0.575	0.575	EEEEEEE		45.64,50.45,43.48,48.49,41.22,54.35,44.81	45.64	MPCPRPFWLRHSRAPQGSGPSSPGSLSAPRSPSRGEDQEEEEEEEGDGSPGSGPI	GGGG	48.69,63.45,48.18,63.12,56.19,53.85,54.13,59.41,53.23,48.77,39.52,39.03,41.48,42.46,41.06,40.52,39.87,41.68,50.05,44.67,40.31,53.59,45.87,42.88,46.25,48.41,47.7,51.83,50.92,43.76,52.97,53.28,37.73,51.05,45.39,50.05,44.21,50.87,45.64,50.45,43.48,48.49,41.22,54.35,44.81,52.22,48.19,36.76,49.02,44.73,37.61,48.08,39.76,49.35,48.39	48.18	|||||||||MPCPRPFWLRHSRAPQGSGPSSPGSLSAPRSPSRGEDQEEE	EEEEGDGSPGSGPILPPASPVECLICVSSFDGVFKLPKRLDCGHVFCLEC	||||||||| GGGG	TTB TTT B SSSS EEE TTS EEEHHH
M0QZC1	M0QZC1_p_2_1	6	160	165	P	M0QZC1_2	60	122	181	0.684	0.684	PPPPPP	S	76.82,73.59,74.38,72.92,72.7,72.12	73.255	GLPALPTQSGLLPRDARAPPSRQGSVRFDRRRGLLYLRPPPPPPGPRKARAPPPPPPLRL	BGGGS B GGGS GGGGS TTSS EEEEETTTTEEEEE SS S EE	85.25,89.54,88.68,87.69,90.54,89.55,90.35,88.16,84.72,84.16,83.94,84.57,80.16,80.45,75.24,75.31,73.02,66.23,59.07,58.03,53.09,56.25,62.26,71.11,83.56,87.18,88.54,89.16,85.99,82.47,80.61,82.29,84.15,87.27,89.72,87.58,87.37,83.16,76.82,73.59,74.38,72.92,72.7,72.12,72.73,66.95,57.85,57.59,61.03,62.07,65.41,69.14,69.69,70.46,71.91,76.89,80.03,77.82,78.24,73.08	78.03	APTRLAPRRGLPALPTQSGLLPRDARAPPSRQGSVRFDRRRGLLYLRPPP	PPPGPRKARAPPPPPPLRLGRPLSRRLSLASPAWVFNAAVALAVLVAAGL	EEE BTTTBGGGS B GGGS GGGGS TTSS EEEEETTTTEEEEE	SS S EE S S S HHHHHHHHHHHHHHHHHHH
M0QZC1	M0QZC1_p_3_1	6	173	178	P	M0QZC1_2	60	122	181	0.684	0.684	PPPPPP		69.14,69.69,70.46,71.91,76.89,80.03	71.185	GLPALPTQSGLLPRDARAPPSRQGSVRFDRRRGLLYLRPPPPPPGPRKARAPPPPPPLRL	BGGGS B GGGS GGGGS TTSS EEEEETTTTEEEEE SS S EE	85.25,89.54,88.68,87.69,90.54,89.55,90.35,88.16,84.72,84.16,83.94,84.57,80.16,80.45,75.24,75.31,73.02,66.23,59.07,58.03,53.09,56.25,62.26,71.11,83.56,87.18,88.54,89.16,85.99,82.47,80.61,82.29,84.15,87.27,89.72,87.58,87.37,83.16,76.82,73.59,74.38,72.92,72.7,72.12,72.73,66.95,57.85,57.59,61.03,62.07,65.41,69.14,69.69,70.46,71.91,76.89,80.03,77.82,78.24,73.08	78.03	LPTQSGLLPRDARAPPSRQGSVRFDRRRGLLYLRPPPPPPGPRKARAPPP	PPPLRLGRPLSRRLSLASPAWVFNAAVALAVLVAAGLVVSGVYIFFLIPH	S B GGGS GGGGS TTSS EEEEETTTTEEEEE SS S	EE S S S HHHHHHHHHHHHHHHHHHHHHHHHHHHHHHHH
O00165	O00165_p_1_1	6	35	40	E	O00165_1	50	16	65	0.479	0.479	EEEEEE		51.08,51.84,51.38,47.72,45.16,41.33	49.4	PRSHRDPFFGGMTRDEDDDEEEEEEGGSWGRGNPRFHSPQHPPEEFGFGF	S TTS S	52.79,43.09,45.62,47.73,45.33,45.87,61.64,57.96,54.14,49.98,46.79,51.04,52.21,46.64,53.25,48.76,52.26,52.61,56.76,51.08,51.84,51.38,47.72,45.16,41.33,34.23,30.64,39.2,33.41,34.16,32.76,35.48,36.07,43.34,39.29,32.79,37.76,35.28,41.4,37.99,45.17,43.29,42.54,38.61,44.61,40.36,37.73,38.12,33.63,39.3	43.975	|||||||||||||MSLFDLFRGFFGFPGPRSHRDPFFGGMTRDEDDDEEE	EEEGGSWGRGNPRFHSPQHPPEEFGFGFSFSPGGGIRFHDNFGFDDLVRD	||||||||||||| HHHHHHHHTT S TTS S	TT S HHHHHHH
O00193	O00193_p_1_1	8	119	126	D	O00193_1	183	1	183	0.543	0.543	DDDDDDDD		46.31,43.5,49.45,50.81,52.46,52.59,53.92,55.97	51.635	MSAARESHPHGVKRSASPDDDLGSSNWEAADLGNEERKQKFLRLMGAGKKEHTGRLVIGDHKSTSHFRTGEEDKKINEELESQYQQSMDSKLSGRYRRHCGLGFSEVEDHDGEGDVAGDDDDDDDDSPDPESPDDSESDSESEKEESAEELQAAEHPDEVEDPKNKKDAKSNYKMMFVKSSGS	TTS TT GGGG SSHHHHHHHHHHTT S S TT TTTS HHHHHHHHHHHHHHHHHHHHHHHTTGGGTT TT	56.02,40.67,53.52,52.53,51.6,55.84,56.17,61.43,61.15,52.71,58.6,63.53,70.68,65.33,63.98,57.25,48.01,51.41,47.38,50.72,48.89,46.28,53.1,55.07,64.22,72.27,75.84,72.87,75.93,79.05,82.75,82.9,86.17,85.99,86.61,87.78,89.43,88.8,85.19,87.71,87.38,85.26,84.47,86.65,85.42,76.43,73.72,67.18,65.17,66.03,62.86,57.61,50.39,61.34,67.11,63.86,60.25,64.51,61.04,59.35,60.4,59.17,58.5,60.67,61.13,67.81,68.44,78.0…	62.74	DKKINEELESQYQQSMDSKLSGRYRRHCGLGFSEVEDHDGEGDVAGDDDD	DDDDSPDPESPDDSESDSESEKEESAEELQAAEHPDEVEDPKNKKDAKSN	HHHHHHHHHHHHHHHHHHHHTTGGGTT TT
O00257	O00257_p_1_1	12	389	400	H	O00257_3	124	281	404	0.543	0.543	HHHHHHHHHHHH		48.84,48.56,50.17,48.71,48.69,47.63,46.05,45.89,41.11,42.85,37.2,43.04	46.84	SGEVAEGEARSPSHKKRAADERHPPADRTFKKAAGAEEKKVEAPPKRREEEVSGVSDPQPQDAGSRKLSPTKEAFGEQPLQLTTKPDLLAWDPARNTHPPSHHPHPHPHHHHHHHHHHHHAVGL	S	40.91,42.46,38.74,44.35,41.24,41.53,43.63,39.96,41.0,42.09,42.15,42.59,37.16,45.15,47.22,44.09,38.24,39.93,44.17,44.91,42.26,43.34,45.14,48.12,53.9,42.08,39.38,56.34,39.74,48.32,50.39,39.83,42.06,34.71,39.92,42.19,41.1,42.17,45.56,43.82,45.4,39.36,43.9,50.26,44.3,40.84,39.53,45.61,42.09,43.11,39.99,45.76,40.55,40.79,42.15,38.43,39.85,45.08,41.03,44.61,41.41,40.84,40.79,39.22,41.82,41.87,40.25,43.…	42.605	SRKLSPTKEAFGEQPLQLTTKPDLLAWDPARNTHPPSHHPHPHPHHHHHH	HHHHHHAVGLNLSHVRKRCLSETHGEREPCKKRLTARSISTPTCLGGSPA	S
O00267	O00267_p_1_1	9	45	53	E	O00267_1	92	1	92	0.353	0.353	EEEEEEEEE		33.48,38.27,31.97,33.92,39.11,37.17,41.12,36.58,35.89	36.58	MSDSEDSNFSEEEDSERSSDGEEAEVDEERRSAAGSEKEEEPEDEEEEEEEEEYDEEEEEEDDDRPPKKPRHGGFILDEADVDDEYEDEDQW	SS	38.52,36.63,40.18,40.6,44.13,43.01,41.42,39.74,41.64,40.66,40.05,41.19,41.8,40.94,41.11,41.27,41.41,40.46,40.51,39.3,41.05,38.85,35.94,42.29,35.57,40.22,38.26,38.03,37.38,37.69,37.52,37.81,40.17,40.7,42.23,41.14,42.06,39.19,39.17,38.01,35.45,40.86,34.84,36.88,33.48,38.27,31.97,33.92,39.11,37.17,41.12,36.58,35.89,38.35,40.76,34.72,35.04,39.62,40.01,38.19,39.19,38.08,39.83,40.92,36.35,37.24,39.22,3…	40.175	||MSDSEDSNFSEEEDSERSSDGEEAEVDEERRSAAGSEKEEEPEDEEEE	EEEEEYDEEEEEEDDDRPPKKPRHGGFILDEADVDDEYEDEDQWEDGAED	||	SS SSTTTT
O00267	O00267_p_2_1	6	56	61	E	O00267_1	92	1	92	0.353	0.353	EEEEEE		34.72,35.04,39.62,40.01,38.19,39.19	38.69	MSDSEDSNFSEEEDSERSSDGEEAEVDEERRSAAGSEKEEEPEDEEEEEEEEEYDEEEEEEDDDRPPKKPRHGGFILDEADVDDEYEDEDQW	SS	38.52,36.63,40.18,40.6,44.13,43.01,41.42,39.74,41.64,40.66,40.05,41.19,41.8,40.94,41.11,41.27,41.41,40.46,40.51,39.3,41.05,38.85,35.94,42.29,35.57,40.22,38.26,38.03,37.38,37.69,37.52,37.81,40.17,40.7,42.23,41.14,42.06,39.19,39.17,38.01,35.45,40.86,34.84,36.88,33.48,38.27,31.97,33.92,39.11,37.17,41.12,36.58,35.89,38.35,40.76,34.72,35.04,39.62,40.01,38.19,39.19,38.08,39.83,40.92,36.35,37.24,39.22,3…	40.175	FSEEEDSERSSDGEEAEVDEERRSAAGSEKEEEPEDEEEEEEEEEYDEEE	EEEDDDRPPKKPRHGGFILDEADVDDEYEDEDQWEDGAEDILEKEEIEAS		SS SSTTTTTHHHHHHHHH
O00268	O00268_p_1_1	6	270	275	P	O00268_2	97	245	341	0.897	0.897	PPPPPP		60.38,67.69,65.78,65.5,66.78,63.42	65.64	GAAAPPAPAAPSPPAAPAPAAPAAAPPPPPPAPATLARPPGHPAGPPTAAPAVPPPAAAQNGGSAGAAPAPAPAAGGPAGVSGQPGPGAAAAAPAPG		33.61,33.42,36.02,39.28,43.32,37.89,40.83,44.8,38.78,37.68,45.19,45.64,40.13,48.51,43.7,39.27,45.8,46.92,41.63,43.99,39.67,44.81,39.65,41.71,49.5,60.38,67.69,65.78,65.5,66.78,63.42,50.44,41.44,46.53,34.99,35.85,39.95,38.78,46.65,45.44,38.18,45.23,49.04,43.9,41.25,47.3,49.69,37.22,41.56,35.91,42.66,37.45,37.79,51.43,46.46,38.08,38.13,32.67,36.54,36.56,34.29,35.04,34.77,35.14,33.63,35.85,36.52,35.7…	39.27	AALLPLPKPAAPGTVIQTPPFVGAAAPPAPAAPSPPAAPAPAAPAAAPPP	PPPAPATLARPPGHPAGPPTAAPAVPPPAAAQNGGSAGAAPAPAPAAGGP
O00294	O00294_p_1_1	7	117	123	E	O00294_1	289	1	289	0.518	0.518	EEEEEEE	HHHHHHH	62.63,68.65,68.99,68.04,68.76,71.21,74.26	68.76	MPLRDETLREVWASDSGHEEESLSPEAPRRPKQRPAPAQRLRKKRTEAPESPCPTGSKPRKPGAGRTGRPREEPSPDPAQARAPQTVYARFLRDPEAKKRDPRETFLVARAPDAEDEEEEEEEDEEDEEEEAEEKKEKILLPPKKPLREKSSADLKERRAKAQGPRGDLGSPDPPPKPLRVRNKEAPAGEGTKMRKTKKKGSGEADKDPSGSPASARKSPAAMFLVGEGSPDKKALKKKGTPKGARKEEEEEEEAATVIKKSNQKGKAKGKGKKKAKEERAPSPPVEVD	HHHHHHHHB S S TT GGGS SHHHHHHHHHHHHHHHHHHHHHHHHHHHS HHHHHHHHHHHHHHHHHHTT S	29.45,40.69,40.14,44.19,50.19,44.77,52.07,52.31,53.71,57.99,62.41,68.31,57.15,50.34,42.44,41.85,36.52,33.94,37.73,34.68,30.54,32.91,35.88,32.28,38.92,36.68,34.88,38.55,36.41,38.75,37.46,36.35,40.32,42.56,45.32,44.92,43.83,39.77,43.17,39.16,42.15,40.94,39.73,42.06,41.57,38.86,41.79,40.33,48.89,42.25,46.04,49.44,39.01,50.01,42.57,40.91,44.06,39.44,48.75,40.59,44.58,47.08,40.54,41.75,40.56,40.66,39.…	40.87	PREEPSPDPAQARAPQTVYARFLRDPEAKKRDPRETFLVARAPDAEDEEE	EEEEDEEDEEEEAEEKKEKILLPPKKPLREKSSADLKERRAKAQGPRGDL	S S TT GGGS SHHHHHH	HHHHHHHHHHHHHHHHHHHHHS
O00294	O00294_p_2_1	7	248	254	E	O00294_1	289	1	289	0.518	0.518	EEEEEEE	HHHHHHH	51.66,52.03,53.33,55.76,54.93,50.9,51.06	52.03	MPLRDETLREVWASDSGHEEESLSPEAPRRPKQRPAPAQRLRKKRTEAPESPCPTGSKPRKPGAGRTGRPREEPSPDPAQARAPQTVYARFLRDPEAKKRDPRETFLVARAPDAEDEEEEEEEDEEDEEEEAEEKKEKILLPPKKPLREKSSADLKERRAKAQGPRGDLGSPDPPPKPLRVRNKEAPAGEGTKMRKTKKKGSGEADKDPSGSPASARKSPAAMFLVGEGSPDKKALKKKGTPKGARKEEEEEEEAATVIKKSNQKGKAKGKGKKKAKEERAPSPPVEVD	HHHHHHHHB S S TT GGGS SHHHHHHHHHHHHHHHHHHHHHHHHHHHS HHHHHHHHHHHHHHHHHHTT S	29.45,40.69,40.14,44.19,50.19,44.77,52.07,52.31,53.71,57.99,62.41,68.31,57.15,50.34,42.44,41.85,36.52,33.94,37.73,34.68,30.54,32.91,35.88,32.28,38.92,36.68,34.88,38.55,36.41,38.75,37.46,36.35,40.32,42.56,45.32,44.92,43.83,39.77,43.17,39.16,42.15,40.94,39.73,42.06,41.57,38.86,41.79,40.33,48.89,42.25,46.04,49.44,39.01,50.01,42.57,40.91,44.06,39.44,48.75,40.59,44.58,47.08,40.54,41.75,40.56,40.66,39.…	40.87	GSGEADKDPSGSPASARKSPAAMFLVGEGSPDKKALKKKGTPKGARKEEE	EEEEAATVIKKSNQKGKAKGKGKKKAKEERAPSPPVEVDEPREFVLRPAP	HHHHHHH	HHHHHHHHHHHTT S HHHHHHS
O00303	O00303_p_1_1	6	50	55	A	O00303_1	82	1	82	0.974	0.974	AAAAAA		34.0,34.73,35.34,35.5,32.77,36.46	35.035	MATPAVPVSAPPATPTPVPAAAPASVPAPTPAPAAAPVPAAAPASSSDPAAAAAATAAPGQTPASAQAPAQTPAPALPGPAL		50.11,40.79,50.42,44.33,40.42,47.3,39.62,39.16,44.86,40.32,40.63,45.06,41.56,37.71,46.39,41.83,35.59,45.04,33.45,36.05,35.15,32.21,40.21,38.76,32.62,41.17,36.28,38.04,46.77,40.19,34.05,39.12,37.19,33.26,34.99,36.18,31.89,39.06,33.98,30.55,32.69,35.01,38.65,32.32,30.97,36.0,37.38,29.84,42.23,34.0,34.73,35.34,35.5,32.77,36.46,32.83,35.65,37.68,37.94,34.9,40.03,33.96,38.36,34.94,32.64,35.41,37.52,31…	37.6	TPAVPVSAPPATPTPVPAAAPASVPAPTPAPAAAPVPAAAPASSSDPAAA	AAATAAPGQTPASAQAPAQTPAPALPGPALPGPFPGGRVVRLHPVILASI		TT EEEE HHHHHHH
O00401	O00401_p_1_1	6	277	282	P	O00401_3	141	266	406	0.649	0.649	PPPPPP		51.27,47.06,51.67,49.88,48.78,51.42	50.575	EAVKNELRRQAPPPPPPSRGGPPPPPPPPHNSGPPPPPARGRGAPPPPPSRAPTAAPPPPPPSRPSVAVPPPPPNRMYPPPPPALPSSAPSGPPPPPPSVLGVGPVAPPPPPPPPPPPGPPPPPGLPSDGDHQVPTTAGNK	HHHHHHHHHHS S SHH	79.12,83.6,82.9,81.0,81.19,80.79,78.4,77.92,75.25,64.77,59.03,51.27,47.06,51.67,49.88,48.78,51.42,44.41,39.87,39.76,53.76,53.36,56.93,61.26,62.28,67.13,63.92,57.17,49.3,49.23,46.02,48.65,52.58,55.7,57.27,56.66,58.35,49.7,47.95,40.86,48.92,47.0,40.91,54.81,57.24,59.87,68.67,57.45,50.18,51.42,42.66,41.84,46.1,43.54,39.23,45.8,53.24,62.14,66.3,63.74,52.52,70.74,49.73,44.02,53.72,45.42,46.47,49.92,49…	54.72	PELKNLFDMCGISEAQLKDRETSKVIYDFIEKTGGVEAVKNELRRQAPPP	PPPSRGGPPPPPPPPHNSGPPPPPARGRGAPPPPPSRAPTAAPPPPPPSR	HHHHHHHHHTT HHHHHSHHHHHHHHHHHHHTTSHHHHHHHHHHHS	S
O00401	O00401_p_2_1	8	287	294	P	O00401_3	141	266	406	0.649	0.649	PPPPPPPP	S	53.36,56.93,61.26,62.28,67.13,63.92,57.17,49.3	59.215	EAVKNELRRQAPPPPPPSRGGPPPPPPPPHNSGPPPPPARGRGAPPPPPSRAPTAAPPPPPPSRPSVAVPPPPPNRMYPPPPPALPSSAPSGPPPPPPSVLGVGPVAPPPPPPPPPPPGPPPPPGLPSDGDHQVPTTAGNK	HHHHHHHHHHS S SHH	79.12,83.6,82.9,81.0,81.19,80.79,78.4,77.92,75.25,64.77,59.03,51.27,47.06,51.67,49.88,48.78,51.42,44.41,39.87,39.76,53.76,53.36,56.93,61.26,62.28,67.13,63.92,57.17,49.3,49.23,46.02,48.65,52.58,55.7,57.27,56.66,58.35,49.7,47.95,40.86,48.92,47.0,40.91,54.81,57.24,59.87,68.67,57.45,50.18,51.42,42.66,41.84,46.1,43.54,39.23,45.8,53.24,62.14,66.3,63.74,52.52,70.74,49.73,44.02,53.72,45.42,46.47,49.92,49…	54.72	ISEAQLKDRETSKVIYDFIEKTGGVEAVKNELRRQAPPPPPPSRGGPPPP	PPPPHNSGPPPPPARGRGAPPPPPSRAPTAAPPPPPPSRPSVAVPPPPPN	HHHHHSHHHHHHHHHHHHHTTSHHHHHHHHHHHS S
O00401	O00401_p_3_1	6	322	327	P	O00401_3	141	266	406	0.649	0.649	PPPPPP		53.24,62.14,66.3,63.74,52.52,70.74	62.94	EAVKNELRRQAPPPPPPSRGGPPPPPPPPHNSGPPPPPARGRGAPPPPPSRAPTAAPPPPPPSRPSVAVPPPPPNRMYPPPPPALPSSAPSGPPPPPPSVLGVGPVAPPPPPPPPPPPGPPPPPGLPSDGDHQVPTTAGNK	HHHHHHHHHHS S SHH	79.12,83.6,82.9,81.0,81.19,80.79,78.4,77.92,75.25,64.77,59.03,51.27,47.06,51.67,49.88,48.78,51.42,44.41,39.87,39.76,53.76,53.36,56.93,61.26,62.28,67.13,63.92,57.17,49.3,49.23,46.02,48.65,52.58,55.7,57.27,56.66,58.35,49.7,47.95,40.86,48.92,47.0,40.91,54.81,57.24,59.87,68.67,57.45,50.18,51.42,42.66,41.84,46.1,43.54,39.23,45.8,53.24,62.14,66.3,63.74,52.52,70.74,49.73,44.02,53.72,45.42,46.47,49.92,49…	54.72	QAPPPPPPSRGGPPPPPPPPHNSGPPPPPARGRGAPPPPPSRAPTAAPPP	PPPSRPSVAVPPPPPNRMYPPPPPALPSSAPSGPPPPPPSVLGVGPVAPP	HS S
O00401	O00401_p_4_1	6	358	363	P	O00401_3	141	266	406	0.649	0.649	PPPPPP		74.37,74.13,74.56,73.12,73.15,69.52	73.64	EAVKNELRRQAPPPPPPSRGGPPPPPPPPHNSGPPPPPARGRGAPPPPPSRAPTAAPPPPPPSRPSVAVPPPPPNRMYPPPPPALPSSAPSGPPPPPPSVLGVGPVAPPPPPPPPPPPGPPPPPGLPSDGDHQVPTTAGNK	HHHHHHHHHHS S SHH	79.12,83.6,82.9,81.0,81.19,80.79,78.4,77.92,75.25,64.77,59.03,51.27,47.06,51.67,49.88,48.78,51.42,44.41,39.87,39.76,53.76,53.36,56.93,61.26,62.28,67.13,63.92,57.17,49.3,49.23,46.02,48.65,52.58,55.7,57.27,56.66,58.35,49.7,47.95,40.86,48.92,47.0,40.91,54.81,57.24,59.87,68.67,57.45,50.18,51.42,42.66,41.84,46.1,43.54,39.23,45.8,53.24,62.14,66.3,63.74,52.52,70.74,49.73,44.02,53.72,45.42,46.47,49.92,49…	54.72	PPPPSRAPTAAPPPPPPSRPSVAVPPPPPNRMYPPPPPALPSSAPSGPPP	PPPSVLGVGPVAPPPPPPPPPPPGPPPPPGLPSDGDHQVPTTAGNKAALL		SHHHHHH
O00401	O00401_p_5_1	11	373	383	P	O00401_3	141	266	406	0.649	0.649	PPPPPPPPPPP		75.58,78.12,77.92,79.83,81.52,80.25,80.7,82.11,79.6,78.02,77.1	79.6	EAVKNELRRQAPPPPPPSRGGPPPPPPPPHNSGPPPPPARGRGAPPPPPSRAPTAAPPPPPPSRPSVAVPPPPPNRMYPPPPPALPSSAPSGPPPPPPSVLGVGPVAPPPPPPPPPPPGPPPPPGLPSDGDHQVPTTAGNK	HHHHHHHHHHS S SHH	79.12,83.6,82.9,81.0,81.19,80.79,78.4,77.92,75.25,64.77,59.03,51.27,47.06,51.67,49.88,48.78,51.42,44.41,39.87,39.76,53.76,53.36,56.93,61.26,62.28,67.13,63.92,57.17,49.3,49.23,46.02,48.65,52.58,55.7,57.27,56.66,58.35,49.7,47.95,40.86,48.92,47.0,40.91,54.81,57.24,59.87,68.67,57.45,50.18,51.42,42.66,41.84,46.1,43.54,39.23,45.8,53.24,62.14,66.3,63.74,52.52,70.74,49.73,44.02,53.72,45.42,46.47,49.92,49…	54.72	SRPSVAVPPPPPNRMYPPPPPALPSSAPSGPPPPPPSVLGVGPVAPPPPP	PPPPPPGPPPPPGLPSDGDHQVPTTAGNKAALLDQIREGAQLKKVEQNSR		SHHHHHHHHHHT
O00409	O00409_p_1_1	6	356	361	S	O00409_3	145	315	459	0.514	0.514	SSSSSS		39.35,43.81,42.6,43.8,40.96,50.46	43.2	RTESEPSCGSPVVSGDPKEDHNYSSAKSSNARSTSPTSDSISSSSSSADDHYEFATKGSQEGSEGSEGSFRSHESPSDTEEDDRKHSQKEPKDSLGDSGYASQHKKRQHFAKARKVPSDTLPLKKRRTEKPPESDDEEMKEAAGS	HHHHHHHHHHHHH	42.48,41.67,43.27,43.25,42.31,43.52,43.81,41.04,42.16,42.37,49.07,43.53,48.26,47.71,44.43,50.77,42.97,51.67,55.86,54.51,62.74,51.1,41.55,47.06,42.67,40.6,39.54,43.09,40.29,40.1,40.68,38.01,41.93,44.52,44.62,57.15,39.42,50.27,41.15,43.54,47.17,39.35,43.81,42.6,43.8,40.96,50.46,45.17,43.8,51.23,47.47,47.52,42.22,41.53,42.48,40.65,50.28,41.15,39.72,43.36,41.25,45.25,48.77,42.89,48.03,54.16,44.19,50.…	44.11	ITSCRMRTESEPSCGSPVVSGDPKEDHNYSSAKSSNARSTSPTSDSISSS	SSSADDHYEFATKGSQEGSEGSEGSFRSHESPSDTEEDDRKHSQKEPKDS
O00461	O00461_p_1_1	8	674	681	E	O00461_3	269	428	696	0.412	0.412	EEEEEEEE		35.34,34.43,37.23,32.17,36.56,35.79,33.73,37.58	35.565	REHQEALHQQRLQGHLLRQQEQQQQQVAREMALQRQAELEEGRPQHQEQLRQQAHYDAMDNDIVQGAEDQGIQGEEGAYERDNQHQDEAEGDPGNRHEPREQGPREADPESEADRAAVEDINPADDPNNQGEDEFEEAEQVREENLPDENEEQKQSNQKQENTEVEEHLVMAGNPDQQEDNVDEQYQEEAEEEVQEDLTEEKKRELEHNAEETYGENDENTDDKNNDGEEQEVRDDNRPKGREEHYEEEEEEEEDGAAVAEKSHRRAEM	HHHHHHHHHHHHHHHHHHHHHHHHHHHHHHHHHHHHHHHHHHHHHHHHHHHHHHHHHHHHHHTTT THHHHHHGGG GGG TT SHHHHHHHHHHTS TTSS S S THHHHHHHTTS	97.01,97.05,97.09,96.35,96.38,97.59,97.52,96.14,96.62,96.91,95.77,96.49,96.95,95.67,96.64,96.99,96.59,95.13,95.68,96.21,95.74,95.53,95.56,95.95,96.01,95.21,95.93,95.68,95.15,94.82,93.88,95.52,94.12,93.5,91.36,90.86,88.73,85.17,82.94,84.01,80.41,76.26,78.09,78.01,79.7,79.49,84.1,84.34,85.64,86.47,85.84,86.38,86.26,83.24,83.74,78.61,78.18,75.0,70.51,67.88,63.76,64.44,57.14,57.39,47.64,41.75,44.19,3…	45.98	EKKRELEHNAEETYGENDENTDDKNNDGEEQEVRDDNRPKGREEHYEEEE	EEEEDGAAVAEKSHRRAEM|||||||||||||||||||||||||||||||	HHHHHHHTTS	|||||||||||||||||||||||||||||||
O00541	O00541_p_1_1	6	458	463	E	O00541_2	68	448	515	0.422	0.422	EEEEEE	HHHHHH	41.67,37.74,36.25,40.52,41.23,37.83	39.175	GEDPGNLNESEEEEEEDDNNEGDGDEEGENEEEEEDAEAGSEKEEEARLAALEEQRMEGKKPRVMAGT	T THHHHHHHHHHHHHSSSS S S TTSHHHHHHHHHHHHHHHHHSS	63.06,57.68,50.52,51.94,46.98,40.87,45.5,43.88,35.51,38.63,41.67,37.74,36.25,40.52,41.23,37.83,37.13,38.86,36.71,32.31,34.48,29.2,30.41,31.49,31.09,31.93,32.9,29.05,31.78,28.77,31.34,31.67,33.53,31.12,33.42,37.35,36.69,36.59,39.87,40.12,51.25,47.05,56.28,57.37,56.56,69.46,72.41,72.42,71.46,76.11,75.32,69.59,68.28,66.79,62.39,61.82,58.22,52.57,44.07,44.67,43.04,43.06,46.05,53.16,55.4,51.77,46.43,5…	43.05	AEYFSGVQLPPHLSPFVTEKEGDYVPPEKLKLLALQRGEDPGNLNESEEE	EEEDDNNEGDGDEEGENEEEEEDAEAGSEKEEEARLAALEEQRMEGKKPR	GGGBTTS TT TTS HHHHHHHHHHHT THHHHHHHHH	HHHHSSSS S S TTSHHHHHHHHHHHHHHHHHSS
O00555	O00555_p_1_1	10	2210	2219	H	O00555_3	464	2043	2506	0.528	0.528	HHHHHHHHHH	S SS	31.53,30.89,24.8,23.6,24.65,21.81,28.28,33.3,42.6,44.51	29.585	GTWSPEQGPPTDMPNSQPNSQSVEMREMGRDGYSDSEHYLPMEGQGRAASMPRLPAENQRRRGRPRGNNLSTISDTSPMKRSASVLGPKARRLDDYSLERVPPEENQRHHQRRRDRSHRASERSLGRYTDVDTGLGTDLSMTTQSGDLPSKERDQERGRPKDRKHRQHHHHHHHHHHPPPPDKDRYAQERPDHGRARARDQRWSRSPSEGREHMAHRQGSSSVSGSPAPSTSGTSTPRRGRRQLPQTPSTPRPHVSYSPVIRKAGGSGPPQQQQQQQQQQQQQAVARPGRAATSGPRRYPGPTAEPLAGDRPPTGGHSSGRSPRMERRVPGPARSESPRACRHGGARWPASGPHVSEGPPGPRHHGYYRGSDYDEADGPGSGGGEEAMAGAYDAPPPVR…	S S SSS S SS S SS SSS S S SSS	26.68,25.29,27.76,31.51,30.85,25.28,27.15,29.7,40.69,33.81,29.26,29.11,28.04,33.93,24.79,29.7,30.38,27.03,22.44,24.43,24.14,24.34,24.41,28.44,27.91,28.13,28.25,24.07,33.78,29.63,23.58,24.24,24.08,23.7,23.09,24.36,23.16,24.22,24.58,26.84,25.15,26.42,23.9,24.38,25.87,25.79,23.14,27.15,24.88,27.68,27.19,32.37,25.67,27.01,30.24,26.64,27.6,27.7,27.59,25.57,26.25,26.03,26.79,29.68,40.58,29.57,33.67,31.…	29.805	RSLGRYTDVDTGLGTDLSMTTQSGDLPSKERDQERGRPKDRKHRQHHHHH	HHHHHPPPPDKDRYAQERPDHGRARARDQRWSRSPSEGREHMAHRQGSSS	S SS S	SS SSS
O00555	O00555_p_2_1	13	2313	2325	Q	O00555_3	464	2043	2506	0.528	0.528	QQQQQQQQQQQQQ	SSS	27.75,27.88,22.59,23.32,21.12,24.57,31.41,31.02,35.58,31.47,38.05,35.25,31.73	31.02	GTWSPEQGPPTDMPNSQPNSQSVEMREMGRDGYSDSEHYLPMEGQGRAASMPRLPAENQRRRGRPRGNNLSTISDTSPMKRSASVLGPKARRLDDYSLERVPPEENQRHHQRRRDRSHRASERSLGRYTDVDTGLGTDLSMTTQSGDLPSKERDQERGRPKDRKHRQHHHHHHHHHHPPPPDKDRYAQERPDHGRARARDQRWSRSPSEGREHMAHRQGSSSVSGSPAPSTSGTSTPRRGRRQLPQTPSTPRPHVSYSPVIRKAGGSGPPQQQQQQQQQQQQQAVARPGRAATSGPRRYPGPTAEPLAGDRPPTGGHSSGRSPRMERRVPGPARSESPRACRHGGARWPASGPHVSEGPPGPRHHGYYRGSDYDEADGPGSGGGEEAMAGAYDAPPPVR…	S S SSS S SS S SS SSS S S SSS	26.68,25.29,27.76,31.51,30.85,25.28,27.15,29.7,40.69,33.81,29.26,29.11,28.04,33.93,24.79,29.7,30.38,27.03,22.44,24.43,24.14,24.34,24.41,28.44,27.91,28.13,28.25,24.07,33.78,29.63,23.58,24.24,24.08,23.7,23.09,24.36,23.16,24.22,24.58,26.84,25.15,26.42,23.9,24.38,25.87,25.79,23.14,27.15,24.88,27.68,27.19,32.37,25.67,27.01,30.24,26.64,27.6,27.7,27.59,25.57,26.25,26.03,26.79,29.68,40.58,29.57,33.67,31.…	29.805	PAPSTSGTSTPRRGRRQLPQTPSTPRPHVSYSPVIRKAGGSGPPQQQQQQ	QQQQQQQAVARPGRAATSGPRRYPGPTAEPLAGDRPPTGGHSSGRSPRME	S S S	SS
O00570	O00570_p_1_1	15	29	43	G	O00570_1	52	1	52	0.768	0.768	GGGGGGGGGGGGGGG	STT	39.91,39.41,38.39,36.16,37.2,33.77,35.4,32.04,32.08,32.64,31.54,36.25,37.96,35.68,46.97	36.16	MYSMMMETDLHSPGGAQAPTNLSGPAGAGGGGGGGGGGGGGGGAKANQDRVK	STTTGGGTSS	48.52,44.98,38.55,53.63,53.75,51.83,46.08,46.56,44.58,52.15,54.76,50.89,52.58,47.49,45.77,45.57,46.68,44.61,52.2,51.35,42.71,50.9,47.47,39.96,50.64,46.99,41.49,46.44,39.91,39.41,38.39,36.16,37.2,33.77,35.4,32.04,32.08,32.64,31.54,36.25,37.96,35.68,46.97,50.28,47.51,49.98,58.66,60.19,81.62,86.47,91.65,93.81	46.62	|||||||||||||||MYSMMMETDLHSPGGAQAPTNLSGPAGAGGGGGGG	GGGGGGGGAKANQDRVKRPMNAFMVWSRGQRRKMAQENPKMHNSEISKRL	|||||||||||||||	STTTGGGTSS HHHHHHHHHHHHHHHH TTS HHHHHHHH
O14497	O14497_p_1_1	6	16	21	P	O14497_1	820	1	820	0.659	0.659	PPPPPP		34.86,34.67,35.04,34.59,34.71,37.97	34.785	MAAQVAPAAASSLGNPPPPPPSELKKAEQQQREEAGGEAAAAAAAERGEMKAAAGQESEGPAVGPPQPLGKELQDGAESNGGGGGGGAGSGGGPGAEPDLKNSNGNAGPRPALNNNLTEPPGGGGGGSSDGVGAPPHSAAAALPPPAYGFGQPYGRSPSAVAAAAAAVFHQQHGGQQSPGLAALQSGGGGGLEPYAGPQQNSHDHGFPNHQYNSYYPNRSAYPPPAPAYALSSPRGGTPGSGAAAAAGSKPPPSSSASASSSSSSFAQQRFGAMGGGGPSAAGGGTPQPTATPTLNQLLTSPSSARGYQGYPGGDYSGGPQDGGAGKGPADMASQCWGAAAAAAAAAAASGGAQQRSHHAPMSPGSSGGGGQPLARTPQPSSPMDQMGKMRPQPYGGTN…	S SS S S S GGGTSS S SS S SS SS SS	31.65,29.26,29.93,27.92,30.63,34.76,38.49,27.92,30.44,31.7,29.87,32.8,32.57,29.59,30.59,34.86,34.67,35.04,34.59,34.71,37.97,34.76,29.81,32.1,33.19,32.84,34.61,30.06,31.32,31.01,31.7,32.33,30.27,30.81,33.24,30.4,30.26,27.05,31.45,30.94,31.75,30.91,31.79,31.21,30.61,28.86,27.05,31.72,26.8,39.65,33.99,33.44,31.13,29.59,28.44,28.96,30.22,30.07,30.74,37.28,38.98,29.25,35.01,25.53,31.89,35.7,42.88,34.3…	31.24	||||||||||||||||||||||||||||||||MAAQVAPAAASSLGNPPP	PPPSELKKAEQQQREEAGGEAAAAAAAERGEMKAAAGQESEGPAVGPPQP	|||||||||||||||||||||||||||||||| S
O14497	O14497_p_2_1	7	39	45	A	O14497_1	820	1	820	0.659	0.659	AAAAAAA		31.45,30.94,31.75,30.91,31.79,31.21,30.61	31.21	MAAQVAPAAASSLGNPPPPPPSELKKAEQQQREEAGGEAAAAAAAERGEMKAAAGQESEGPAVGPPQPLGKELQDGAESNGGGGGGGAGSGGGPGAEPDLKNSNGNAGPRPALNNNLTEPPGGGGGGSSDGVGAPPHSAAAALPPPAYGFGQPYGRSPSAVAAAAAAVFHQQHGGQQSPGLAALQSGGGGGLEPYAGPQQNSHDHGFPNHQYNSYYPNRSAYPPPAPAYALSSPRGGTPGSGAAAAAGSKPPPSSSASASSSSSSFAQQRFGAMGGGGPSAAGGGTPQPTATPTLNQLLTSPSSARGYQGYPGGDYSGGPQDGGAGKGPADMASQCWGAAAAAAAAAAASGGAQQRSHHAPMSPGSSGGGGQPLARTPQPSSPMDQMGKMRPQPYGGTN…	S SS S S S GGGTSS S SS S SS SS SS	31.65,29.26,29.93,27.92,30.63,34.76,38.49,27.92,30.44,31.7,29.87,32.8,32.57,29.59,30.59,34.86,34.67,35.04,34.59,34.71,37.97,34.76,29.81,32.1,33.19,32.84,34.61,30.06,31.32,31.01,31.7,32.33,30.27,30.81,33.24,30.4,30.26,27.05,31.45,30.94,31.75,30.91,31.79,31.21,30.61,28.86,27.05,31.72,26.8,39.65,33.99,33.44,31.13,29.59,28.44,28.96,30.22,30.07,30.74,37.28,38.98,29.25,35.01,25.53,31.89,35.7,42.88,34.3…	31.24	|||||||||MAAQVAPAAASSLGNPPPPPPSELKKAEQQQREEAGGEAAA	AAAAERGEMKAAAGQESEGPAVGPPQPLGKELQDGAESNGGGGGGGAGSG	||||||||| S	SS
O14497	O14497_p_3_1	7	81	87	G	O14497_1	820	1	820	0.659	0.659	GGGGGGG		33.7,32.68,28.48,27.81,26.8,27.37,29.19	28.48	MAAQVAPAAASSLGNPPPPPPSELKKAEQQQREEAGGEAAAAAAAERGEMKAAAGQESEGPAVGPPQPLGKELQDGAESNGGGGGGGAGSGGGPGAEPDLKNSNGNAGPRPALNNNLTEPPGGGGGGSSDGVGAPPHSAAAALPPPAYGFGQPYGRSPSAVAAAAAAVFHQQHGGQQSPGLAALQSGGGGGLEPYAGPQQNSHDHGFPNHQYNSYYPNRSAYPPPAPAYALSSPRGGTPGSGAAAAAGSKPPPSSSASASSSSSSFAQQRFGAMGGGGPSAAGGGTPQPTATPTLNQLLTSPSSARGYQGYPGGDYSGGPQDGGAGKGPADMASQCWGAAAAAAAAAAASGGAQQRSHHAPMSPGSSGGGGQPLARTPQPSSPMDQMGKMRPQPYGGTN…	S SS S S S GGGTSS S SS S SS SS SS	31.65,29.26,29.93,27.92,30.63,34.76,38.49,27.92,30.44,31.7,29.87,32.8,32.57,29.59,30.59,34.86,34.67,35.04,34.59,34.71,37.97,34.76,29.81,32.1,33.19,32.84,34.61,30.06,31.32,31.01,31.7,32.33,30.27,30.81,33.24,30.4,30.26,27.05,31.45,30.94,31.75,30.91,31.79,31.21,30.61,28.86,27.05,31.72,26.8,39.65,33.99,33.44,31.13,29.59,28.44,28.96,30.22,30.07,30.74,37.28,38.98,29.25,35.01,25.53,31.89,35.7,42.88,34.3…	31.24	EAGGEAAAAAAAERGEMKAAAGQESEGPAVGPPQPLGKELQDGAESNGGG	GGGGAGSGGGPGAEPDLKNSNGNAGPRPALNNNLTEPPGGGGGGSSDGVG	SS
O14497	O14497_p_4_1	6	122	127	G	O14497_1	820	1	820	0.659	0.659	GGGGGG		31.92,31.76,31.76,30.89,30.56,30.86	31.325	MAAQVAPAAASSLGNPPPPPPSELKKAEQQQREEAGGEAAAAAAAERGEMKAAAGQESEGPAVGPPQPLGKELQDGAESNGGGGGGGAGSGGGPGAEPDLKNSNGNAGPRPALNNNLTEPPGGGGGGSSDGVGAPPHSAAAALPPPAYGFGQPYGRSPSAVAAAAAAVFHQQHGGQQSPGLAALQSGGGGGLEPYAGPQQNSHDHGFPNHQYNSYYPNRSAYPPPAPAYALSSPRGGTPGSGAAAAAGSKPPPSSSASASSSSSSFAQQRFGAMGGGGPSAAGGGTPQPTATPTLNQLLTSPSSARGYQGYPGGDYSGGPQDGGAGKGPADMASQCWGAAAAAAAAAAASGGAQQRSHHAPMSPGSSGGGGQPLARTPQPSSPMDQMGKMRPQPYGGTN…	S SS S S S GGGTSS S SS S SS SS SS	31.65,29.26,29.93,27.92,30.63,34.76,38.49,27.92,30.44,31.7,29.87,32.8,32.57,29.59,30.59,34.86,34.67,35.04,34.59,34.71,37.97,34.76,29.81,32.1,33.19,32.84,34.61,30.06,31.32,31.01,31.7,32.33,30.27,30.81,33.24,30.4,30.26,27.05,31.45,30.94,31.75,30.91,31.79,31.21,30.61,28.86,27.05,31.72,26.8,39.65,33.99,33.44,31.13,29.59,28.44,28.96,30.22,30.07,30.74,37.28,38.98,29.25,35.01,25.53,31.89,35.7,42.88,34.3…	31.24	DGAESNGGGGGGGAGSGGGPGAEPDLKNSNGNAGPRPALNNNLTEPPGGG	GGGSSDGVGAPPHSAAAALPPPAYGFGQPYGRSPSAVAAAAAAVFHQQHG	SS
O14497	O14497_p_5_1	6	162	167	A	O14497_1	820	1	820	0.659	0.659	AAAAAA		31.19,28.99,25.03,31.41,34.57,30.58	30.885	MAAQVAPAAASSLGNPPPPPPSELKKAEQQQREEAGGEAAAAAAAERGEMKAAAGQESEGPAVGPPQPLGKELQDGAESNGGGGGGGAGSGGGPGAEPDLKNSNGNAGPRPALNNNLTEPPGGGGGGSSDGVGAPPHSAAAALPPPAYGFGQPYGRSPSAVAAAAAAVFHQQHGGQQSPGLAALQSGGGGGLEPYAGPQQNSHDHGFPNHQYNSYYPNRSAYPPPAPAYALSSPRGGTPGSGAAAAAGSKPPPSSSASASSSSSSFAQQRFGAMGGGGPSAAGGGTPQPTATPTLNQLLTSPSSARGYQGYPGGDYSGGPQDGGAGKGPADMASQCWGAAAAAAAAAAASGGAQQRSHHAPMSPGSSGGGGQPLARTPQPSSPMDQMGKMRPQPYGGTN…	S SS S S S GGGTSS S SS S SS SS SS	31.65,29.26,29.93,27.92,30.63,34.76,38.49,27.92,30.44,31.7,29.87,32.8,32.57,29.59,30.59,34.86,34.67,35.04,34.59,34.71,37.97,34.76,29.81,32.1,33.19,32.84,34.61,30.06,31.32,31.01,31.7,32.33,30.27,30.81,33.24,30.4,30.26,27.05,31.45,30.94,31.75,30.91,31.79,31.21,30.61,28.86,27.05,31.72,26.8,39.65,33.99,33.44,31.13,29.59,28.44,28.96,30.22,30.07,30.74,37.28,38.98,29.25,35.01,25.53,31.89,35.7,42.88,34.3…	31.24	NNLTEPPGGGGGGSSDGVGAPPHSAAAALPPPAYGFGQPYGRSPSAVAAA	AAAVFHQQHGGQQSPGLAALQSGGGGGLEPYAGPQQNSHDHGFPNHQYNS		S
O14497	O14497_p_6_1	6	260	265	S	O14497_1	820	1	820	0.659	0.659	SSSSSS		26.66,26.56,24.06,27.46,24.0,26.37	26.465	MAAQVAPAAASSLGNPPPPPPSELKKAEQQQREEAGGEAAAAAAAERGEMKAAAGQESEGPAVGPPQPLGKELQDGAESNGGGGGGGAGSGGGPGAEPDLKNSNGNAGPRPALNNNLTEPPGGGGGGSSDGVGAPPHSAAAALPPPAYGFGQPYGRSPSAVAAAAAAVFHQQHGGQQSPGLAALQSGGGGGLEPYAGPQQNSHDHGFPNHQYNSYYPNRSAYPPPAPAYALSSPRGGTPGSGAAAAAGSKPPPSSSASASSSSSSFAQQRFGAMGGGGPSAAGGGTPQPTATPTLNQLLTSPSSARGYQGYPGGDYSGGPQDGGAGKGPADMASQCWGAAAAAAAAAAASGGAQQRSHHAPMSPGSSGGGGQPLARTPQPSSPMDQMGKMRPQPYGGTN…	S SS S S S GGGTSS S SS S SS SS SS	31.65,29.26,29.93,27.92,30.63,34.76,38.49,27.92,30.44,31.7,29.87,32.8,32.57,29.59,30.59,34.86,34.67,35.04,34.59,34.71,37.97,34.76,29.81,32.1,33.19,32.84,34.61,30.06,31.32,31.01,31.7,32.33,30.27,30.81,33.24,30.4,30.26,27.05,31.45,30.94,31.75,30.91,31.79,31.21,30.61,28.86,27.05,31.72,26.8,39.65,33.99,33.44,31.13,29.59,28.44,28.96,30.22,30.07,30.74,37.28,38.98,29.25,35.01,25.53,31.89,35.7,42.88,34.3…	31.24	NSYYPNRSAYPPPAPAYALSSPRGGTPGSGAAAAAGSKPPPSSSASASSS	SSSFAQQRFGAMGGGGPSAAGGGTPQPTATPTLNQLLTSPSSARGYQGYP	S	S GGGTSS
O14497	O14497_p_7_1	11	339	349	A	O14497_1	820	1	820	0.659	0.659	AAAAAAAAAAA		28.07,28.27,31.12,31.04,31.55,32.87,34.2,35.91,37.85,36.91,35.43	32.87	MAAQVAPAAASSLGNPPPPPPSELKKAEQQQREEAGGEAAAAAAAERGEMKAAAGQESEGPAVGPPQPLGKELQDGAESNGGGGGGGAGSGGGPGAEPDLKNSNGNAGPRPALNNNLTEPPGGGGGGSSDGVGAPPHSAAAALPPPAYGFGQPYGRSPSAVAAAAAAVFHQQHGGQQSPGLAALQSGGGGGLEPYAGPQQNSHDHGFPNHQYNSYYPNRSAYPPPAPAYALSSPRGGTPGSGAAAAAGSKPPPSSSASASSSSSSFAQQRFGAMGGGGPSAAGGGTPQPTATPTLNQLLTSPSSARGYQGYPGGDYSGGPQDGGAGKGPADMASQCWGAAAAAAAAAAASGGAQQRSHHAPMSPGSSGGGGQPLARTPQPSSPMDQMGKMRPQPYGGTN…	S SS S S S GGGTSS S SS S SS SS SS	31.65,29.26,29.93,27.92,30.63,34.76,38.49,27.92,30.44,31.7,29.87,32.8,32.57,29.59,30.59,34.86,34.67,35.04,34.59,34.71,37.97,34.76,29.81,32.1,33.19,32.84,34.61,30.06,31.32,31.01,31.7,32.33,30.27,30.81,33.24,30.4,30.26,27.05,31.45,30.94,31.75,30.91,31.79,31.21,30.61,28.86,27.05,31.72,26.8,39.65,33.99,33.44,31.13,29.59,28.44,28.96,30.22,30.07,30.74,37.28,38.98,29.25,35.01,25.53,31.89,35.7,42.88,34.3…	31.24	TLNQLLTSPSSARGYQGYPGGDYSGGPQDGGAGKGPADMASQCWGAAAAA	AAAAAASGGAQQRSHHAPMSPGSSGGGGQPLARTPQPSSPMDQMGKMRPQ	GGGTSS	S SS
O14497	O14497_p_8_1	8	1327	1334	Q	O14497_3	371	1113	1483	0.607	0.607	QQQQQQQQ		31.76,34.12,34.86,36.73,37.07,39.81,39.57,34.58	35.795	PPPDIFAAADSKKSQPKIQPPSPAGSGSMQGPQTPQSTSSSMAEGGDLKPPTPASTPHSQIPPLPGMSRSNSVGIQDAFNDGSDSTFQKRNSMTPNPGYQPSMNTSDMMGRMSYEPNKDPYGSMRKAPGSDPFMSSGQGPNGGMGDPYSRAAGPGLGNVAMGPRQHYPYGGPYDRVRTEPGIGPEGNMSTGAPQPNLMPSNPDSGMYSPSRYPPQQQQQQQQRHDSYGNQFSTQGTPSGSPFPSQQTTMYQQQQQNYKRPMDGTYGPPAKRHEGEMYSVPYSTGQGQPQQQQLPPAQPQPASQQQAAQPSPQQDVYNQYGNAYPATATAATERRPAGGPQNQFPFQFGRDRVSAPPGTNAQQNMPPQMMGG	TTS S SS SS S S S SS SS	38.16,35.71,35.44,36.65,35.35,32.81,29.98,30.88,25.69,27.07,33.64,32.17,32.97,30.77,24.96,31.4,24.7,30.36,26.03,41.12,27.69,26.17,30.38,29.34,27.05,27.23,28.4,31.28,32.0,33.65,33.84,37.45,29.01,29.47,35.4,27.45,28.58,27.29,25.82,27.6,30.14,29.23,30.73,27.27,28.9,28.14,28.73,34.85,26.31,28.57,34.58,31.45,34.65,30.2,29.29,45.96,32.35,30.95,32.73,28.91,31.47,38.07,37.83,25.88,29.22,29.46,25.38,22.64…	30.55	YGGPYDRVRTEPGIGPEGNMSTGAPQPNLMPSNPDSGMYSPSRYPPQQQQ	QQQQRHDSYGNQFSTQGTPSGSPFPSQQTTMYQQQQQNYKRPMDGTYGPP	S	SS SS S S S
O14511	O14511_p_1_1	6	25	30	S	O14511_1	96	1	96	0.63	0.63	SSSSSS		36.85,38.2,37.27,38.13,39.1,38.32	38.165	MRQVCCSALPPPPLEKGRCSSYSDSSSSSSERSSSSSSSSSESGSSSRSSSNNSSISRPAAPPEPRPQQQPQPRSPAARRAAARSRAAAAGGMRRD		37.04,40.55,38.74,45.09,42.51,44.29,43.85,37.3,44.58,47.41,51.13,59.47,42.65,38.3,40.44,34.43,38.75,36.9,28.45,37.05,33.88,37.89,35.58,35.45,36.85,38.2,37.27,38.13,39.1,38.32,37.91,37.27,39.74,37.31,41.16,38.39,34.52,38.29,36.02,36.45,36.2,36.21,36.98,37.19,38.1,37.56,40.06,38.31,37.18,39.06,42.41,42.42,41.39,41.69,39.82,42.49,41.65,41.04,45.72,42.09,40.28,50.42,52.77,40.84,50.44,42.21,47.45,41.3…	38.245	|||||||||||||||||||||||MRQVCCSALPPPPLEKGRCSSYSDSSS	SSSERSSSSSSSSSESGSSSRSSSNNSSISRPAAPPEPRPQQQPQPRSPA	|||||||||||||||||||||||
O14511	O14511_p_2_1	9	33	41	S	O14511_1	96	1	96	0.63	0.63	SSSSSSSSS		39.74,37.31,41.16,38.39,34.52,38.29,36.02,36.45,36.2	37.31	MRQVCCSALPPPPLEKGRCSSYSDSSSSSSERSSSSSSSSSESGSSSRSSSNNSSISRPAAPPEPRPQQQPQPRSPAARRAAARSRAAAAGGMRRD		37.04,40.55,38.74,45.09,42.51,44.29,43.85,37.3,44.58,47.41,51.13,59.47,42.65,38.3,40.44,34.43,38.75,36.9,28.45,37.05,33.88,37.89,35.58,35.45,36.85,38.2,37.27,38.13,39.1,38.32,37.91,37.27,39.74,37.31,41.16,38.39,34.52,38.29,36.02,36.45,36.2,36.21,36.98,37.19,38.1,37.56,40.06,38.31,37.18,39.06,42.41,42.42,41.39,41.69,39.82,42.49,41.65,41.04,45.72,42.09,40.28,50.42,52.77,40.84,50.44,42.21,47.45,41.3…	38.245	||||||||||||||MRQVCCSALPPPPLEKGRCSSYSDSSSSSSERSSSS	SSSSSESGSSSRSSSNNSSISRPAAPPEPRPQQQPQPRSPAARRAAARSR	||||||||||||||
O14512	O14512_p_1_1	6	143	148	G	O14512_3	150	123	272	0.69	0.69	GGGGGG		38.42,39.32,38.45,38.31,39.1,40.88	38.775	EAESLETNSCSEEELSSPGRGGGGGGRLLLQPPGPELPPVPFPLQDLVPLGRLSRGEQQQQQQQQPPPPPPPPGPLRPLAGPSRKGSFKIRLSRLFRTKSCNGGSGGGDGTGKRPSGELAASAASLTDMGGSAGRELDAGRKPKLTRTQS		34.31,35.75,33.16,35.31,37.91,38.42,36.21,41.65,31.57,36.97,38.28,43.38,42.66,41.0,43.68,38.02,42.35,45.17,39.47,41.4,38.42,39.32,38.45,38.31,39.1,40.88,41.54,33.76,36.05,37.16,36.69,51.61,49.44,38.2,50.84,35.89,40.38,43.21,40.84,38.65,38.26,37.05,46.97,33.28,39.06,35.86,32.69,38.62,34.46,31.85,37.25,32.69,38.47,32.71,33.62,32.29,35.12,38.28,32.08,38.53,33.18,37.17,32.41,39.78,41.32,52.55,59.09,6…	38.27	PPAAAPQAGEDPTETSDALLVLEGLESEAESLETNSCSEEELSSPGRGGG	GGGRLLLQPPGPELPPVPFPLQDLVPLGRLSRGEQQQQQQQQPPPPPPPP	SSS
O14512	O14512_p_2_1	8	180	187	Q	O14512_3	150	123	272	0.69	0.69	QQQQQQQQ		38.28,32.08,38.53,33.18,37.17,32.41,39.78,41.32	37.725	EAESLETNSCSEEELSSPGRGGGGGGRLLLQPPGPELPPVPFPLQDLVPLGRLSRGEQQQQQQQQPPPPPPPPGPLRPLAGPSRKGSFKIRLSRLFRTKSCNGGSGGGDGTGKRPSGELAASAASLTDMGGSAGRELDAGRKPKLTRTQS		34.31,35.75,33.16,35.31,37.91,38.42,36.21,41.65,31.57,36.97,38.28,43.38,42.66,41.0,43.68,38.02,42.35,45.17,39.47,41.4,38.42,39.32,38.45,38.31,39.1,40.88,41.54,33.76,36.05,37.16,36.69,51.61,49.44,38.2,50.84,35.89,40.38,43.21,40.84,38.65,38.26,37.05,46.97,33.28,39.06,35.86,32.69,38.62,34.46,31.85,37.25,32.69,38.47,32.71,33.62,32.29,35.12,38.28,32.08,38.53,33.18,37.17,32.41,39.78,41.32,52.55,59.09,6…	38.27	EEELSSPGRGGGGGGRLLLQPPGPELPPVPFPLQDLVPLGRLSRGEQQQQ	QQQQPPPPPPPPGPLRPLAGPSRKGSFKIRLSRLFRTKSCNGGSGGGDGT
O14512	O14512_p_3_1	8	188	195	P	O14512_3	150	123	272	0.69	0.69	PPPPPPPP		52.55,59.09,63.31,66.67,65.69,66.89,61.43,57.6	62.37	EAESLETNSCSEEELSSPGRGGGGGGRLLLQPPGPELPPVPFPLQDLVPLGRLSRGEQQQQQQQQPPPPPPPPGPLRPLAGPSRKGSFKIRLSRLFRTKSCNGGSGGGDGTGKRPSGELAASAASLTDMGGSAGRELDAGRKPKLTRTQS		34.31,35.75,33.16,35.31,37.91,38.42,36.21,41.65,31.57,36.97,38.28,43.38,42.66,41.0,43.68,38.02,42.35,45.17,39.47,41.4,38.42,39.32,38.45,38.31,39.1,40.88,41.54,33.76,36.05,37.16,36.69,51.61,49.44,38.2,50.84,35.89,40.38,43.21,40.84,38.65,38.26,37.05,46.97,33.28,39.06,35.86,32.69,38.62,34.46,31.85,37.25,32.69,38.47,32.71,33.62,32.29,35.12,38.28,32.08,38.53,33.18,37.17,32.41,39.78,41.32,52.55,59.09,6…	38.27	RGGGGGGRLLLQPPGPELPPVPFPLQDLVPLGRLSRGEQQQQQQQQPPPP	PPPPGPLRPLAGPSRKGSFKIRLSRLFRTKSCNGGSGGGDGTGKRPSGEL
O14513	O14513_p_1_1	8	1116	1123	S	O14513_4	444	1026	1469	0.702	0.702	SSSSSSSS		34.18,31.01,36.02,34.68,33.54,31.18,35.99,33.17	33.86	SSSFTVMALGPPKVSPKRGVPKTSPRQTLGTPQRDIGLQTPRISPSTHEPLEMTSSKSVSPGRKGQLNDSASTPPKPSFLGVNESPSSQVSSSSSSSSPAKSHNSPHGCQSAHEKGLKTRLPVGLKVLMKSPQLLRKSSTVPGKHEKDSLNEASKSSVAVNKSKPEDSKNPASMEITAGERNVTLPDSQAQGSLADGLPLETALQEPLESSIPGSDGRDGVDNRSMRRSLSSSKPHLKPALGMNGAKARSHSFSTHSGDKPSTPPIEGSGKVRTQIITNTAERGNSLTRQNSSTESSPNKAPSAPMLESLPSVGRPSGHPSSGKGSLGSSGSFSSQHGSPSKLPLRIPPKSEGLLIPPGKEDQQAFTQGECPSANVAVLGEPGSDRRSCPPTPTDCPEA…	SS S S S	28.75,26.12,27.67,27.46,29.25,31.62,33.1,33.27,32.98,31.71,41.7,39.39,31.47,29.37,32.32,38.84,36.54,29.61,26.47,39.03,29.4,34.01,28.85,46.03,34.51,31.61,31.51,30.84,31.86,33.14,36.18,35.96,32.97,33.11,31.83,36.56,30.83,31.31,31.8,34.7,40.11,36.84,43.39,40.26,38.84,31.86,29.73,29.33,33.79,40.85,29.74,28.1,29.49,27.73,29.24,30.63,31.48,27.96,29.95,36.99,41.99,34.75,33.79,32.17,34.44,30.16,32.13,28.…	33.79	PSTHEPLEMTSSKSVSPGRKGQLNDSASTPPKPSFLGVNESPSSQVSSSS	SSSSPAKSHNSPHGCQSAHEKGLKTRLPVGLKVLMKSPQLLRKSSTVPGK
O14514	O14514_p_2_1	12	1411	1422	P	O14514_3	91	1385	1475	0.63	0.63	PPPPPPPPPPPP		51.31,52.59,54.58,56.41,49.38,46.6,49.46,55.51,50.16,54.78,46.52,45.0	50.735	EASLPARSPPSRQPPSGGPPEAPPAQPPPPPPPPPPPPQQPLPPPPNLEPAPPSLGDPGEPAAHPGPSTGPSTKNENVATLSVSSLERRKS	S	27.61,33.69,32.03,30.42,31.44,30.52,30.84,29.38,36.19,29.75,28.59,30.6,31.61,41.6,37.99,32.38,36.74,33.62,41.34,45.77,34.2,40.26,44.29,44.0,38.65,41.64,51.31,52.59,54.58,56.41,49.38,46.6,49.46,55.51,50.16,54.78,46.52,45.0,41.0,46.09,41.68,41.73,47.94,44.49,52.88,42.85,35.54,35.36,35.06,37.11,37.17,38.18,39.85,33.66,32.43,30.72,40.21,40.33,33.03,35.34,40.3,36.12,34.57,40.35,43.12,39.38,43.38,40.83…	37.17	IHIDQMPQTRLIHLSTAPEASLPARSPPSRQPPSGGPPEAPPAQPPPPPP	PPPPPPQQPLPPPPNLEPAPPSLGDPGEPAAHPGPSTGPSTKNENVATLS
O14529	O14529_p_1_1	6	808	813	S	O14529_6	59	800	858	0.667	0.667	SSSSSS		30.82,34.78,32.95,32.06,35.18,32.53	32.74	YASVSPSLSSSSSSGYSGQPNGRAWPRGDEAPVPPEDEAAAGAEDEPPRTGELKAEGAT		29.51,34.1,34.22,35.91,33.61,37.69,30.95,36.06,30.82,34.78,32.95,32.06,35.18,32.53,28.16,33.58,31.51,33.5,32.11,36.6,30.48,33.14,31.31,28.42,29.57,38.56,29.29,35.55,33.42,36.24,34.91,37.36,35.33,43.99,39.83,32.05,36.09,35.11,32.89,32.6,29.36,33.8,33.74,36.11,35.98,32.34,45.35,39.14,34.75,33.11,33.24,29.74,34.44,30.69,32.54,29.7,29.04,29.93,28.2	33.42	VLSPAAFVQSIIRKVKSEIGDAGYFDHHWASDRGLLSRPYASVSPSLSSS	SSSGYSGQPNGRAWPRGDEAPVPPEDEAAAGAEDEPPRTGELKAEGATAE	HHHHHHHHHHHHHHHTTS TTSSHHHH S
O14545	O14545_p_1_1	6	577	582	E	O14545_2	182	401	582	0.615	0.615	EEEEEE		53.81,53.01,53.56,54.04,57.72,55.45	53.925	TEGIPRLDSQPQETSPELPRRRVRHQGDLSSGYLDDTKQETANGPTSCLPPSRPINNMTATYNQLSRSTSGPRPGCQPSSPCVPKLSNSDSQDIQGRNRDSQNGAIAPGHVSVIRPPQNLYPENIVPSFSPGPSGRYGASGRSEGGRNSRVTPAAANYRSRTAKAKPSKQQGAGDAEEEEEE		43.31,38.91,37.27,40.41,35.57,46.55,34.62,43.79,35.38,40.37,35.66,37.56,36.5,37.9,41.64,39.71,33.58,44.86,38.99,46.9,42.06,42.46,51.93,46.34,50.13,47.95,39.31,40.37,45.07,41.24,39.86,36.31,38.71,48.6,37.01,41.94,41.94,41.97,39.83,36.86,39.44,40.5,40.47,35.39,39.51,37.05,36.05,27.03,37.88,50.79,40.4,34.31,39.78,41.33,38.16,44.89,35.69,46.75,36.0,40.52,38.08,33.61,42.08,39.26,40.69,40.6,36.74,37.87…	40.89	SPGPSGRYGASGRSEGGRNSRVTPAAANYRSRTAKAKPSKQQGAGDAEEE	EEE|||||||||||||||||||||||||||||||||||||||||||||||		|||||||||||||||||||||||||||||||||||||||||||||||
O14559	O14559_p_1_1	6	679	684	S	O14559_2	242	551	792	0.708	0.708	SSSSSS		28.28,28.81,32.48,30.08,35.17,32.47	31.275	RTQGRLGTPTEPTTPKAPASPAERRKGERGEKQRKPGGSSWKTFFALGRGPSVPRKKPLPWLGGTRAPPQPSGSRPDTVTLRSAKSEESLSSQASGAGLQRLHRLRRPHSSSDAFPVGPAPAGSCESLSSSSSSESSSSESSSSSSESSAAGLGALSGSPSHRTSAWLDDGDELDFSPPRCLEGLRGLDFDPLTFRCSSPTPGDPAPPASPAPPAPASAFPPRVTPQAISPRGPTSPASPAA	TTS S B TT	66.77,56.09,56.14,43.48,39.55,36.3,35.96,38.96,37.2,33.92,37.18,41.59,38.85,40.97,44.52,39.02,42.46,43.93,37.55,40.51,38.93,34.84,32.5,31.98,33.56,31.31,33.0,30.56,30.72,32.54,31.18,31.45,29.79,31.39,29.81,39.44,32.71,33.22,31.29,32.07,35.5,33.46,36.66,35.12,37.12,31.77,34.79,32.88,34.1,35.9,38.18,34.71,36.91,34.9,30.12,31.48,31.14,31.64,32.03,34.98,28.53,31.42,28.73,29.69,29.73,29.09,30.08,39.78…	33.75	RSAKSEESLSSQASGAGLQRLHRLRRPHSSSDAFPVGPAPAGSCESLSSS	SSSESSSSESSSSSSESSAAGLGALSGSPSHRTSAWLDDGDELDFSPPRC
O14559	O14559_p_2_1	6	691	696	S	O14559_2	242	551	792	0.708	0.708	SSSSSS		37.5,38.03,37.14,37.49,38.15,37.68	37.59	RTQGRLGTPTEPTTPKAPASPAERRKGERGEKQRKPGGSSWKTFFALGRGPSVPRKKPLPWLGGTRAPPQPSGSRPDTVTLRSAKSEESLSSQASGAGLQRLHRLRRPHSSSDAFPVGPAPAGSCESLSSSSSSESSSSESSSSSSESSAAGLGALSGSPSHRTSAWLDDGDELDFSPPRCLEGLRGLDFDPLTFRCSSPTPGDPAPPASPAPPAPASAFPPRVTPQAISPRGPTSPASPAA	TTS S B TT	66.77,56.09,56.14,43.48,39.55,36.3,35.96,38.96,37.2,33.92,37.18,41.59,38.85,40.97,44.52,39.02,42.46,43.93,37.55,40.51,38.93,34.84,32.5,31.98,33.56,31.31,33.0,30.56,30.72,32.54,31.18,31.45,29.79,31.39,29.81,39.44,32.71,33.22,31.29,32.07,35.5,33.46,36.66,35.12,37.12,31.77,34.79,32.88,34.1,35.9,38.18,34.71,36.91,34.9,30.12,31.48,31.14,31.64,32.03,34.98,28.53,31.42,28.73,29.69,29.73,29.09,30.08,39.78…	33.75	ASGAGLQRLHRLRRPHSSSDAFPVGPAPAGSCESLSSSSSSESSSSESSS	SSSESSAAGLGALSGSPSHRTSAWLDDGDELDFSPPRCLEGLRGLDFDPL		TT
O14559	O14559_p_3_1	6	1183	1188	S	O14559_7	142	1146	1287	0.633	0.633	SSSSSS		34.59,36.03,33.37,36.12,34.69,33.09	34.64	PPDHLGYSAPQHPARRPTPPEPLYVNLALGPRGPSPASSSSSSPPAHPRSRSDPGPPVPRLPQKQRAPWGPRTPHRVPGPWGPPEPLLLYRAAPPAYGRGGELHRGSLYRNGGQRGEGAGPPPPYPTPSWSLHSEGQTRSYC	S	44.82,39.47,30.7,36.68,34.53,33.84,31.96,34.54,34.42,38.53,34.11,33.15,39.57,31.01,33.93,31.19,37.27,32.08,41.45,37.23,28.11,34.59,28.65,27.48,31.43,29.77,31.22,32.97,34.38,33.59,39.24,38.31,39.09,39.87,37.78,42.54,36.36,34.59,36.03,33.37,36.12,34.69,33.09,37.64,40.13,38.13,34.08,48.63,38.54,35.56,36.2,37.92,34.93,45.13,39.35,37.83,56.64,40.1,40.88,37.8,35.39,43.75,38.99,34.17,38.32,35.55,32.76,4…	37.25	LSYPPAPSCFPPDHLGYSAPQHPARRPTPPEPLYVNLALGPRGPSPASSS	SSSPPAHPRSRSDPGPPVPRLPQKQRAPWGPRTPHRVPGPWGPPEPLLLY
O14646	O14646_p_1_1	9	105	113	Q	O14646_1	252	1	252	0.47	0.47	QQQQQQQQQ	HHHHHHHHH	53.57,53.69,52.24,51.17,50.52,49.35,47.17,42.52,41.28	50.52	MNGHSDEESVRNSSGESSQSDDDSGSASGSGSGSSSGSSSDGSSSQSGSSDSDSGSESGSQSESESDTSRENKVQAKPPKVDGAEFWKSSPSILAVQRSAILKKQQQQQQQQQHQASSNSGSEEDSSSSEDSDDSSSEVKRKKHKDEDWQMSGSGSPSQSGSDSESEEEREKSSCDETESDYEPKNKVKSRKPQNRSKSKNGKKILGQKKRQIDSSEEDDDEEDYDNDKRSSRRQATVNVSYKEDEEMKTDS	HHHHTTS TTHHHHHHHHHHHHHHHHHHHHHTTTTS	34.54,34.33,35.5,37.55,37.73,44.11,34.04,37.66,36.07,35.06,36.06,33.03,35.33,32.49,36.74,35.09,33.54,37.26,36.68,37.95,38.85,40.42,40.35,37.71,36.96,34.24,36.38,33.66,35.4,32.73,35.48,33.47,35.46,30.86,35.59,32.77,34.8,31.78,29.97,35.69,31.72,35.6,32.03,32.68,36.65,33.28,36.62,34.42,36.29,31.38,35.84,31.46,32.25,29.82,32.33,29.5,29.75,28.84,29.11,29.42,28.82,29.61,32.44,29.17,31.35,28.49,29.25,31…	33.945	GSQSESESDTSRENKVQAKPPKVDGAEFWKSSPSILAVQRSAILKKQQQQ	QQQQQHQASSNSGSEEDSSSSEDSDDSSSEVKRKKHKDEDWQMSGSGSPS	HHHHTTS TTHHHHHHHHHHHHHHHH	HHHHHTTTTS
O14649	O14649_p_1_1	7	271	277	G	O14649_1	21	266	286	0.669	0.669	GGGGGGG	T	52.41,45.95,40.16,36.02,37.17,36.34,34.6	37.17	RNGQAGGGGGGGSAHTTDTAS	HHHHHT	79.11,72.25,61.32,55.81,53.69,52.41,45.95,40.16,36.02,37.17,36.34,34.6,34.0,33.94,37.47,33.17,34.74,30.94,30.63,30.04,28.49	36.34	SFVYILTGLTVIGAFLNLVVLRFMTMNAEDEKRDAEHRALLTRNGQAGGG	GGGGSAHTTDTASSTAAAGGGGFRNVYAEVLHFQSMCSCLWYKSREKLQY	HHHHHHHHHHHHHHHHHHHTHHHHHHHHHHHHHHHHHHHHHHHHHHHT	HHHHHHHHHHHHHT HHHHHHHHHHHTT
O14654	O14654_p_4_1	12	628	639	P	O14654_1	248	406	653	0.584	0.584	PPPPPPPPPPPP		56.95,46.37,63.46,69.43,55.43,64.17,69.54,58.01,59.38,65.64,63.11,39.66	61.245	VAHSRRGRLHLPRGRRSRRAVSVPASFFRRLAPSPARPRHPAEAPNNGARLSSEVSGSGSGNFGEEGNPQGKEDQEGSGGDYMPMNNWGSGNGRGSGGGQGSNGQGSSSHSSGGNQCSGEGQGSRGGQGSNGQGSGGNQCSRDGQGTAGGHGSGGGQRPGGGHGSGGGQGPGDGHGSGGGKNSGGGKGSGSGKGSDGDGERGKSLKKRSYFGKLTQSKQQQMPPPPPPPPPPPPAGGTGGKGKSGGRF		42.37,40.14,42.88,43.44,36.04,38.98,37.66,38.45,32.05,36.28,39.74,40.7,33.92,39.06,37.24,40.29,37.21,37.71,33.31,30.89,32.71,31.23,42.01,33.74,31.13,31.19,34.23,32.83,31.38,31.76,35.53,35.83,39.95,36.43,42.3,37.35,35.28,39.35,33.07,36.66,39.14,34.84,34.25,35.99,38.69,36.17,34.89,35.64,36.75,33.33,36.0,34.71,34.7,30.98,34.35,33.68,33.51,32.26,34.3,30.56,34.08,32.05,35.93,39.15,39.71,37.69,39.41,39…	37.765	GGKNSGGGKGSGSGKGSDGDGERGKSLKKRSYFGKLTQSKQQQMPPPPPP	PPPPPPAGGTGGKGKSGGRFRLYFCVDRGATKECKEAKEVKDAEIPEGAA
O14654	O14654_p_6_1	7	1206	1212	A	O14654_3	79	1179	1257	0.55	0.55	AAAAAAA		38.35,36.49,36.53,36.61,34.48,36.88,35.47	36.53	QDVAGGSNPGAHNPSANLARGDNQAGGAAAAAAAPEPPPRSRRVPRPPEREDSDNDDDTHVRMDFARRDNQFDSPKRGR		34.76,34.7,37.34,34.99,35.11,34.03,35.8,40.8,48.88,38.98,37.33,39.1,42.41,55.15,39.13,43.51,43.84,41.96,46.44,40.55,47.58,40.55,40.93,41.19,38.81,38.68,36.37,38.35,36.49,36.53,36.61,34.48,36.88,35.47,41.33,33.77,39.51,50.16,37.81,30.71,29.2,29.9,35.25,42.84,38.17,29.05,44.73,46.11,34.85,34.78,40.14,39.36,35.63,37.04,37.1,39.11,39.73,36.46,38.64,31.6,33.05,31.86,40.84,36.61,39.49,37.61,32.69,37.52…	38.17	SARWFQPVANAADAEAVRGAQDVAGGSNPGAHNPSANLARGDNQAGGAAA	AAAAPEPPPRSRRVPRPPEREDSDNDDDTHVRMDFARRDNQFDSPKRGR|	S	|
O14669	O14669_p_1_1	8	166	173	P	O14669_1	60	143	202	0.779	0.779	PPPPPPPP		69.03,75.4,72.53,71.22,73.51,72.37,69.48,71.69	72.03	CPQEAGLISPLSPLNPLGPPTPLPPPPPPPPGLPTYEQALAASGVHDAPPPPYTSLRRPH	TTSSSS HHHHHH	41.76,46.58,42.32,43.17,44.12,44.22,42.37,42.38,43.24,44.31,47.3,47.17,43.41,49.14,47.65,44.89,44.02,55.74,59.97,53.73,62.1,59.3,60.52,69.03,75.4,72.53,71.22,73.51,72.37,69.48,71.69,70.38,71.28,72.64,77.23,75.31,77.0,79.72,69.06,68.5,76.0,68.93,59.46,66.61,62.03,61.48,59.91,70.22,75.05,74.06,75.92,76.58,63.99,65.31,65.14,57.06,60.2,55.66,67.99,60.2	62.065	LIVLAGLGAFWYLRWRQHRGQQPCPQEAGLISPLSPLNPLGPPTPLPPPP	PPPPGLPTYEQALAASGVHDAPPPPYTSLRRPH|||||||||||||||||	HHHHHHHHHHHHHHHHHHHTT TTSSSS	HHHHHH |||||||||||||||||
O14787	O14787_p_1_1	6	360	365	D	O14787_1	40	325	364	0.498	0.498	DDDDDD	T G	33.25,36.51,42.07,46.77,50.93,53.21	44.42	AVPDSEQDIKPRFHKSRTVTLPHEAERPDGSEDAEDDDDD	TS GGGS S GGGTT	88.26,87.3,86.4,83.86,79.92,72.44,70.44,69.51,68.25,65.83,63.57,65.62,66.84,65.6,58.3,55.79,59.37,53.48,49.43,48.27,41.36,33.52,35.86,26.45,26.58,25.99,33.69,35.32,27.55,25.85,27.89,27.83,27.65,29.89,28.34,33.25,36.51,42.07,46.77,50.93	48.85	IILLKGDVEEDEAVPDSEQDIKPRFHKSRTVTLPHEAERPDGSEDAEDDD	DDDALSDWNLRKCSAAALDVLANVFREELLPHLLPLLKGLLFHPEWVVKE	HHHTTTT TTS GGGS S GGGTT	GGG S HHHHHHHHHHHHHHHHGGGGHHHHHHHHHHHTT SSHHHHH
O14813	O14813_p_1_1	6	237	242	G	O14813_1	140	145	284	0.795	0.795	GGGGGG		44.73,44.66,47.46,44.16,46.47,46.4	45.565	FRKQERAASAKGAAGAAGAKKGEARCSSEDDDSKESTCSPTPDSTASLPPPPAPGLASPRLSPSPLPVALGSGPGPGPGPQPLKGALWAGVAGGGGGGPGAGAAELLKAWQPAESGPGPFSGVLSSFHRKPGPALKTNLF	HHHHHHHHHHHHHHTTT S S	96.47,95.61,94.18,91.57,87.88,85.56,85.1,83.04,78.22,76.0,66.87,61.35,57.89,54.04,49.14,51.15,48.86,40.56,43.67,49.37,45.12,41.43,44.21,46.77,46.73,38.78,42.81,50.86,48.67,56.1,53.46,49.2,54.08,53.95,48.19,53.72,40.87,38.59,41.98,50.21,52.28,54.29,37.33,50.89,49.39,49.42,48.69,56.54,65.4,67.1,72.24,61.31,59.68,61.7,45.7,50.22,53.9,53.21,54.96,46.85,54.64,58.32,55.56,57.98,56.34,63.97,60.85,58.45,…	53.115	ASLPPPPAPGLASPRLSPSPLPVALGSGPGPGPGPQPLKGALWAGVAGGG	GGGPGAGAAELLKAWQPAESGPGPFSGVLSSFHRKPGPALKTNLF|||||		S |||||
O14958	O14958_p_1_1	6	378	383	D	O14958_1	35	365	399	0.303	0.303	DDDDDD	GS	50.95,49.6,46.79,47.49,47.53,48.11	47.82	VLSGKINTEDDDEDDDDDDNSDEEDNDDSDDDDDE	HHTTSS SSGGGGGS	95.79,94.53,94.61,92.91,94.17,92.97,91.69,88.69,81.72,73.14,63.76,59.1,52.11,50.95,49.6,46.79,47.49,47.53,48.11,47.8,44.82,50.71,48.39,47.99,48.07,45.24,47.58,49.72,50.34,50.23,51.18,46.24,47.38,47.39,43.29	50.23	IGVVNVTDADSVWMEIPDDDDLPTAEELEDWIEDVLSGKINTEDDDEDDD	DDDNSDEEDNDDSDDDDDE|||||||||||||||||||||||||||||||	EEEEETTT EEE SSS HHHHHHHHHHHHTTSS SSGGGGGS	|||||||||||||||||||||||||||||||
O14979	O14979_p_1_1	6	99	104	A	O14979_2	25	96	120	0.756	0.756	AAAAAA		37.59,40.59,40.69,42.33,42.26,42.96	41.475	QRSAAAAAATRTARQHPPADSSVTM		46.95,43.47,51.22,37.59,40.59,40.69,42.33,42.26,42.96,47.46,47.58,46.06,46.37,42.85,46.09,52.7,61.93,51.9,43.71,44.29,40.31,42.57,38.56,45.83,45.85	44.29	QGARRAQRHVTAQQPSRLAGGAAIKGGRRRRPDLFRRHFKSSSIQRSAAA	AAATRTARQHPPADSSVTMEDMNEYSNIEEFAEGSKINASKNQQDDGKMF		TTHHHHHTTSS TTEEE
O14979	O14979_p_2_1	6	316	321	Q	O14979_3	36	313	348	0.445	0.445	QQQQQQ	HHHHHH	72.53,66.22,62.23,60.52,60.12,58.08	61.375	VYRQQQQQQKGGRGAAAGGRGGTRGRGRGQGQNWNQ	HHHHHHHHHHTTSSSSS	66.34,68.14,71.36,72.53,66.22,62.23,60.52,60.12,58.08,54.41,48.37,50.09,47.72,46.6,50.47,48.86,46.85,41.28,44.68,45.13,37.25,44.03,45.32,39.68,43.78,42.54,42.21,41.53,41.06,44.15,40.81,43.25,33.82,33.59,39.87,39.24	45.225	KTNERRGFCFITYTDEEPVKKLLESRYHQIGSGKCEIKVAQPKEVYRQQQ	QQQKGGRGAAAGGRGGTRGRGRGQGQNWNQGFNNYYDQGYGNYNSAYGGD	TT B SEEEEEESSSHHHHHHHHS EEEETTEEEEEEE HHHHHHHH	HHHHTTSSSSS
O15016	O15016_p_1_1	6	458	463	P	O15016_1	67	438	504	0.589	0.589	PPPPPP		53.72,56.27,65.2,65.3,60.2,66.79	62.7	FGHHQKLKLSHFQQQPQQQLPPPPPPLPHPPPPLPPPPQQPHPPLPPSQHLASSQHESPPGPACSQN	SSHHH	33.01,30.21,35.3,29.32,33.63,31.23,33.3,29.72,33.62,29.55,34.45,31.38,32.12,37.77,36.35,34.65,35.43,32.53,36.44,41.93,53.72,56.27,65.2,65.3,60.2,66.79,58.01,59.39,62.18,66.67,61.55,71.93,67.73,53.69,66.3,65.71,59.49,54.03,39.76,43.61,44.71,40.57,54.81,49.34,39.78,53.75,43.35,35.73,38.32,35.64,33.24,32.27,33.2,29.3,34.09,31.96,34.41,34.32,43.5,40.48,38.09,43.07,38.21,35.11,41.46,41.97,47.85	39.76	VCIVPPQDVQQGAHAQPTLQTPSIQVQFGHHQKLKLSHFQQQPQQQLPPP	PPPLPHPPPPLPPPPQQPHPPLPPSQHLASSQHESPPGPACSQNMDIMHH		SSHHHHHHHHH
O15021	O15021_p_1_1	6	63	68	P	O15021_1	76	1	76	0.732	0.732	PPPPPP		44.62,45.94,38.85,44.61,50.8,44.35	44.615	MGEKVSEAPEPVPRGCSGHGSRTPASALVAASSPGASSAESSSGSETLSEEGEPGGFSREHQPPPPPPLGGTLGAR	S B S S	43.01,42.04,35.12,36.38,33.44,34.97,46.07,41.52,47.72,31.38,40.23,31.57,40.48,34.7,35.72,35.53,37.92,33.97,34.42,27.71,29.12,27.14,29.5,37.99,32.95,31.58,35.66,29.03,30.02,23.29,28.96,28.54,27.75,32.99,31.97,31.65,30.22,28.61,28.26,30.69,26.6,29.14,28.89,30.23,25.81,25.69,28.55,26.8,30.21,28.31,26.06,30.17,31.68,37.78,31.27,27.6,29.43,24.19,27.93,29.14,36.35,31.51,44.62,45.94,38.85,44.61,50.8,44.…	31.615	CSGHGSRTPASALVAASSPGASSAESSSGSETLSEEGEPGGFSREHQPPP	PPPLGGTLGARAPAAWAPASVLLERGVLALPPPLPGGAVPPAPRGSSASQ	B	S S
O15040	O15040_p_1_1	6	466	471	K	O15040_2	80	463	542	0.666	0.666	KKKKKK		32.55,34.78,31.44,34.31,32.94,27.98	32.745	VKRKKKKKKTEGGSRSTCHSSLESTPCSEFPGDSPQSLNTDLLSMTSSVLGSSVDQLSAESPDQESSFNGEVNGVPQENT	SS	31.58,32.03,33.11,32.55,34.78,31.44,34.31,32.94,27.98,33.1,32.04,32.95,33.92,35.18,33.36,31.05,29.26,24.58,31.94,28.03,29.29,30.15,31.39,31.67,33.42,29.5,22.14,30.31,28.44,27.25,29.42,26.26,29.93,25.12,34.67,28.92,26.68,30.83,28.53,28.84,32.72,33.58,32.24,30.08,35.69,31.22,32.99,31.35,31.59,30.83,29.08,29.65,30.93,32.52,34.29,34.31,35.16,31.9,33.51,32.03,32.93,36.49,33.58,32.2,32.82,32.26,33.52,3…	31.985	GSGLLPPGLQATPELGKGSQPLSQRFNAISSEDFDQELVVKPIKVKRKKK	KKKTEGGSRSTCHSSLESTPCSEFPGDSPQSLNTDLLSMTSSVLGSSVDQ	S S TTS	SS
O15047	O15047_p_1_1	13	345	357	S	O15047_2	32	332	363	0.774	0.774	SSSSSSSSSSSSS		33.66,34.19,34.59,32.78,32.32,30.73,31.22,30.89,31.22,31.76,30.13,30.87,29.37	31.22	AATASSSASSSSLSSSSSSSSSSSSSQFRSSD		27.96,27.37,28.23,30.56,32.48,32.94,33.6,35.88,36.17,35.89,35.97,32.06,35.12,33.66,34.19,34.59,32.78,32.32,30.73,31.22,30.89,31.22,31.76,30.13,30.87,29.37,29.75,28.21,29.2,29.46,30.03,33.68	31.49	SENSYQDAFSRRHFSASSASTTASTAIAATTAATASSSASSSSLSSSSSS	SSSSSSSQFRSSDANYPAYYESWNRYQRHTSYPPRRATREEPPGAPFAEN		S SS
O15047	O15047_p_2_1	8	441	448	G	O15047_3	106	381	486	0.57	0.57	GGGGGGGG		34.42,32.36,31.97,31.55,29.83,29.9,30.37,40.12	31.76	SYPPRRATREEPPGAPFAENTAERFPPSYTSYLPPEPSRPTDQDYRPPASEAPPPEPPEPGGGGGGGGPSPEREEVRTSPRPASPARSGSPAPETTNESVPFAQHS		26.74,27.93,37.42,26.83,29.75,27.42,26.67,30.89,26.26,29.11,34.13,32.86,31.33,28.64,29.65,33.64,26.92,30.45,30.29,30.38,29.46,29.13,28.72,30.42,26.26,45.35,34.51,27.06,26.83,28.98,27.21,32.51,35.39,31.79,32.55,27.74,38.8,28.28,26.77,34.87,30.48,31.88,29.24,29.21,27.13,31.48,32.75,37.63,31.74,29.42,30.64,32.91,35.88,40.36,36.61,40.29,46.27,40.12,41.07,34.83,34.42,32.36,31.97,31.55,29.83,29.9,30.37…	31.515	APFAENTAERFPPSYTSYLPPEPSRPTDQDYRPPASEAPPPEPPEPGGGG	GGGGPSPEREEVRTSPRPASPARSGSPAPETTNESVPFAQHSSLDSRIEM		TTHHHHHH
O15047	O15047_p_3_1	13	604	616	P	O15047_4	150	506	655	0.636	0.636	PPPPPPPPPPPPP		51.89,50.25,48.83,56.97,63.05,51.3,57.07,61.81,53.89,49.31,55.05,53.3,37.26	53.3	LASDTEEEEENSSMVLGARDTGSEVPSGSGHGPCTPPPAPANFEDVAPTGSGEPGATRESPKANGQNQASPCSSGDDMEISDDDRGGSPPPAPTPPQQPPPPPPPPPPPPPYLASLPLGYPPHQPAYLLPPRPDGPPPPEYPPPPPPPPH	S	35.14,29.73,32.88,35.08,35.19,35.05,38.71,39.45,39.62,38.86,35.67,33.42,35.64,32.96,34.49,33.53,32.07,35.28,31.98,35.51,36.18,33.1,34.29,34.19,40.38,42.79,38.02,35.71,38.13,35.86,33.29,31.83,35.27,29.63,34.27,39.86,41.47,43.38,32.39,47.19,32.27,33.85,34.4,38.82,35.54,36.96,34.79,40.92,30.06,34.8,28.42,36.29,37.1,39.33,33.45,31.33,28.81,27.17,29.05,32.09,42.07,29.22,31.43,31.32,36.62,34.71,38.38,3…	37.145	GATRESPKANGQNQASPCSSGDDMEISDDDRGGSPPPAPTPPQQPPPPPP	PPPPPPPYLASLPLGYPPHQPAYLLPPRPDGPPPPEYPPPPPPPPHIYDF		S
O15047	O15047_p_4_1	8	647	654	P	O15047_4	150	506	655	0.636	0.636	PPPPPPPP		50.17,46.7,48.96,47.5,43.76,53.21,43.68,38.57	47.1	LASDTEEEEENSSMVLGARDTGSEVPSGSGHGPCTPPPAPANFEDVAPTGSGEPGATRESPKANGQNQASPCSSGDDMEISDDDRGGSPPPAPTPPQQPPPPPPPPPPPPPYLASLPLGYPPHQPAYLLPPRPDGPPPPEYPPPPPPPPH	S	35.14,29.73,32.88,35.08,35.19,35.05,38.71,39.45,39.62,38.86,35.67,33.42,35.64,32.96,34.49,33.53,32.07,35.28,31.98,35.51,36.18,33.1,34.29,34.19,40.38,42.79,38.02,35.71,38.13,35.86,33.29,31.83,35.27,29.63,34.27,39.86,41.47,43.38,32.39,47.19,32.27,33.85,34.4,38.82,35.54,36.96,34.79,40.92,30.06,34.8,28.42,36.29,37.1,39.33,33.45,31.33,28.81,27.17,29.05,32.09,42.07,29.22,31.43,31.32,36.62,34.71,38.38,3…	37.145	PQQPPPPPPPPPPPPPYLASLPLGYPPHQPAYLLPPRPDGPPPPEYPPPP	PPPPHIYDFVNSLELMDRLGAQWGGMPMSFQMQTQMLTRLHQLRQGKGLI		S SSGGGGGGS S HHHHHHHHHHHHHHTS
O15047	O15047_p_5_1	24	1035	1058	S	O15047_6	361	891	1251	0.569	0.569	SSSSSSSSSSSSSSSSSSSSSSSS		33.66,33.81,33.45,33.28,30.8,32.64,29.9,30.86,28.46,28.82,28.45,28.58,28.7,28.93,29.67,29.61,30.01,28.94,29.31,29.14,30.84,30.26,29.44,27.96	29.64	PSFKVKRKEPSEISEASEEKRPRPSTPAEEDEDDPEQEKEAGEPGRPGTKPPKRDEERGKTQGKHRKSFALDSEGEEASQESSSEKDEEDDEEDEEDEDREEAVDTTKKETEVSDGEDEESDSSSKCSLYADSDGENDSTSDSESSSSSSSSSSSSSSSSSSSSSSSSESSSEDEEEEERPAALPSASPPPREVPVPTPAPVEVPVPERVAGSPVTPLPEQEASPARPAGPTEESPPSAPLRPPEPPAGPPAPAPRPDERPSSPIPLLPPPKKRRKTVSFSAIEVVPAPEPPPATPPQAKFPGPASRKAPRGVERTIRNLPLDHASLVKSWPEEVSRGGRSRAGGRGRLTEEEEAEPGTEV	SS	38.62,37.52,29.83,33.15,38.76,33.73,37.21,44.09,34.69,41.56,38.23,29.71,35.98,35.16,29.73,29.81,33.7,35.37,36.67,39.27,32.87,36.82,31.43,41.78,33.15,31.27,36.6,34.32,32.39,38.87,43.1,44.19,40.41,45.36,44.53,34.85,34.67,36.53,38.72,32.19,34.35,36.46,36.11,40.99,37.6,39.41,37.53,33.85,39.29,34.24,43.75,46.88,34.11,39.11,39.69,43.01,39.26,35.8,38.29,40.61,39.01,34.4,37.38,38.58,31.59,32.43,36.39,34.…	34.09	TKKETEVSDGEDEESDSSSKCSLYADSDGENDSTSDSESSSSSSSSSSSS	SSSSSSSSSSSSESSSEDEEEEERPAALPSASPPPREVPVPTPAPVEVPV
O15047	O15047_p_6_1	6	1370	1375	E	O15047_8	111	1307	1417	0.565	0.565	EEEEEE		26.43,26.71,26.94,27.2,28.43,28.49	27.07	KPTPPAPALRPPEPVPAPAALFSSPADEVLEAPEVVVAEAEEPKPQQLQQQREEGEEEGEEEGEEEEEESSDSSSSSDGEGALRRRSLRSHARRRRPPPPPPPPPPRAYEP		33.72,36.69,35.05,41.55,39.19,38.64,39.91,35.2,35.51,38.39,32.94,44.22,37.29,32.07,37.07,32.96,29.23,35.91,33.07,30.57,35.18,29.05,33.97,33.28,37.79,28.97,29.89,36.41,30.27,33.45,31.39,33.73,38.83,29.91,31.99,34.22,29.83,34.38,27.83,30.22,32.08,28.99,31.54,30.96,36.31,30.64,29.18,29.57,27.65,28.31,28.93,28.51,30.58,30.58,30.33,30.56,30.59,30.64,30.8,28.65,28.77,28.19,30.15,26.43,26.71,26.94,27.2,…	32.61	APAALFSSPADEVLEAPEVVVAEAEEPKPQQLQQQREEGEEEGEEEGEEE	EEESSDSSSSSDGEGALRRRSLRSHARRRRPPPPPPPPPPRAYEPRSEFE		HHH
O15047	O15047_p_7_1	10	1403	1412	P	O15047_8	111	1307	1417	0.565	0.565	PPPPPPPPPP		44.2,51.65,61.3,66.32,70.98,69.07,72.96,70.35,70.5,61.96	67.695	KPTPPAPALRPPEPVPAPAALFSSPADEVLEAPEVVVAEAEEPKPQQLQQQREEGEEEGEEEGEEEEEESSDSSSSSDGEGALRRRSLRSHARRRRPPPPPPPPPPRAYEP		33.72,36.69,35.05,41.55,39.19,38.64,39.91,35.2,35.51,38.39,32.94,44.22,37.29,32.07,37.07,32.96,29.23,35.91,33.07,30.57,35.18,29.05,33.97,33.28,37.79,28.97,29.89,36.41,30.27,33.45,31.39,33.73,38.83,29.91,31.99,34.22,29.83,34.38,27.83,30.22,32.08,28.99,31.54,30.96,36.31,30.64,29.18,29.57,27.65,28.31,28.93,28.51,30.58,30.58,30.33,30.56,30.59,30.64,30.8,28.65,28.77,28.19,30.15,26.43,26.71,26.94,27.2,…	32.61	REEGEEEGEEEGEEEEEESSDSSSSSDGEGALRRRSLRSHARRRRPPPPP	PPPPPRAYEPRSEFEQMTILYDIWNSGLDSEDMSYLRLTYERLLQQTSGA		HHHHHHHHHHHHHH TTHHHHHHHHHHHHTT TTT
O15054	O15054_p_1_1	13	252	264	P	O15054_2	491	190	680	0.715	0.715	PPPPPPPPPPPPP		59.67,64.03,69.3,61.04,63.86,64.57,59.29,58.77,55.66,56.58,59.12,53.23,48.07	59.29	AKRGGPPVKRAAEPPVVQPVPPAALSGPSGEEGLSPGGKRRRGCNSEQTGLPPGLPLPPPPLPPPPPPPPPPPPPLPGLATSPPFQLTKPGLWSTLHGDAWGPERKGSAPPERQEQRHSLPHPYPYPAPAYTAHPPGHRLVPAAPPGPGPRPPGAESHGCLPATRPPGSDLRESRVQRSRMDSSVSPAATTACVPYAPSRPPGLPGTTTSSSSSSSSNTGLRGVEPNPGIPGADHYQTPALEVSHHGRLGPSAHSSRKPFLGAPAATPHLSLPPGPSSPPPPPCPRLLRPPPPPAWLKGPACRAAREDGEILEELFFGTEGPPRPAPPPLPHREGFLGPPASRFSVGTQDSHTPPTPPTPTTSSSNSNSGSHSSSPAGPVSFPPPPYLARSIDPLPRPP…	SS S TT S	34.95,32.32,31.22,30.69,33.25,35.57,34.21,37.1,36.09,31.05,34.86,33.55,31.96,40.68,41.09,30.73,35.87,32.02,42.71,32.9,45.75,44.57,35.09,33.15,33.49,34.93,31.16,47.67,33.2,31.25,32.13,29.85,33.09,34.12,31.82,37.02,27.26,29.74,34.75,32.83,33.83,35.87,30.79,33.27,30.25,33.43,32.06,32.24,32.51,34.48,36.24,41.13,40.15,34.42,33.92,35.59,40.31,48.89,56.85,49.4,56.85,60.36,59.67,64.03,69.3,61.04,63.86,64…	33.55	PVPPAALSGPSGEEGLSPGGKRRRGCNSEQTGLPPGLPLPPPPLPPPPPP	PPPPPPPLPGLATSPPFQLTKPGLWSTLHGDAWGPERKGSAPPERQEQRH
O15054	O15054_p_2_1	8	399	406	S	O15054_2	491	190	680	0.715	0.715	SSSSSSSS		30.77,29.17,29.48,28.53,27.19,26.98,27.51,28.59	28.56	AKRGGPPVKRAAEPPVVQPVPPAALSGPSGEEGLSPGGKRRRGCNSEQTGLPPGLPLPPPPLPPPPPPPPPPPPPLPGLATSPPFQLTKPGLWSTLHGDAWGPERKGSAPPERQEQRHSLPHPYPYPAPAYTAHPPGHRLVPAAPPGPGPRPPGAESHGCLPATRPPGSDLRESRVQRSRMDSSVSPAATTACVPYAPSRPPGLPGTTTSSSSSSSSNTGLRGVEPNPGIPGADHYQTPALEVSHHGRLGPSAHSSRKPFLGAPAATPHLSLPPGPSSPPPPPCPRLLRPPPPPAWLKGPACRAAREDGEILEELFFGTEGPPRPAPPPLPHREGFLGPPASRFSVGTQDSHTPPTPPTPTTSSSNSNSGSHSSSPAGPVSFPPPPYLARSIDPLPRPP…	SS S TT S	34.95,32.32,31.22,30.69,33.25,35.57,34.21,37.1,36.09,31.05,34.86,33.55,31.96,40.68,41.09,30.73,35.87,32.02,42.71,32.9,45.75,44.57,35.09,33.15,33.49,34.93,31.16,47.67,33.2,31.25,32.13,29.85,33.09,34.12,31.82,37.02,27.26,29.74,34.75,32.83,33.83,35.87,30.79,33.27,30.25,33.43,32.06,32.24,32.51,34.48,36.24,41.13,40.15,34.42,33.92,35.59,40.31,48.89,56.85,49.4,56.85,60.36,59.67,64.03,69.3,61.04,63.86,64…	33.55	TRPPGSDLRESRVQRSRMDSSVSPAATTACVPYAPSRPPGLPGTTTSSSS	SSSSNTGLRGVEPNPGIPGADHYQTPALEVSHHGRLGPSAHSSRKPFLGA
O15054	O15054_p_3_1	11	752	762	T	O15054_3	104	704	807	0.698	0.698	TTTTTTTTTTT		31.71,33.76,33.5,32.71,34.66,32.65,33.58,33.12,30.73,30.76,29.35	32.71	ESIRKEEEQQQHEAGVAPQPPLKEPFASLQSPFPTDTAPTTTAPAVAVTTTTTTTTTTTATQEEEKKPPPALPPPPPLAKFPPPSQPQPPPPPPPSPASLLKSL	HHHHHHHHHHHHHTT	80.87,76.25,82.49,80.77,80.41,77.67,78.02,74.55,67.95,61.32,58.67,53.89,49.24,44.53,34.97,35.55,36.39,33.87,38.08,40.91,37.96,33.86,37.5,31.74,37.73,35.48,34.42,34.79,33.22,33.81,31.3,38.75,37.21,38.64,33.4,34.49,33.93,32.91,42.39,31.59,28.66,34.45,32.55,41.23,30.08,31.36,30.71,33.16,31.71,33.76,33.5,32.71,34.66,32.65,33.58,33.12,30.73,30.76,29.35,28.27,28.05,28.19,27.13,28.62,27.85,29.23,27.39,3…	34	RKEEEQQQHEAGVAPQPPLKEPFASLQSPFPTDTAPTTTAPAVAVTTTTT	TTTTTTATQEEEKKPPPALPPPPPLAKFPPPSQPQPPPPPPPSPASLLKS	HHHHHHHHHHTT
O15054	O15054_p_4_1	7	792	798	P	O15054_3	104	704	807	0.698	0.698	PPPPPPP		36.12,34.81,37.68,35.06,36.64,35.47,34.07	35.47	ESIRKEEEQQQHEAGVAPQPPLKEPFASLQSPFPTDTAPTTTAPAVAVTTTTTTTTTTTATQEEEKKPPPALPPPPPLAKFPPPSQPQPPPPPPPSPASLLKSL	HHHHHHHHHHHHHTT	80.87,76.25,82.49,80.77,80.41,77.67,78.02,74.55,67.95,61.32,58.67,53.89,49.24,44.53,34.97,35.55,36.39,33.87,38.08,40.91,37.96,33.86,37.5,31.74,37.73,35.48,34.42,34.79,33.22,33.81,31.3,38.75,37.21,38.64,33.4,34.49,33.93,32.91,42.39,31.59,28.66,34.45,32.55,41.23,30.08,31.36,30.71,33.16,31.71,33.76,33.5,32.71,34.66,32.65,33.58,33.12,30.73,30.76,29.35,28.27,28.05,28.19,27.13,28.62,27.85,29.23,27.39,3…	34	TAPAVAVTTTTTTTTTTTATQEEEKKPPPALPPPPPLAKFPPPSQPQPPP	PPPPSPASLLKSLASVLEGQKYCYRGTGAAVSTRPGPLPTTQYSPGPPSG
O15060	O15060_p_1_1	6	202	207	P	O15060_2	49	176	224	0.616	0.616	PPPPPP		44.17,48.98,43.22,53.55,49.48,42.33	46.575	SDAGGSYKEEEKNVASDANHSLHLPQPPPPPPKTEDHDTPAPFTSIPSM		26.85,34.87,36.52,32.79,32.71,29.18,33.27,35.88,32.77,37.1,37.26,37.28,31.19,31.03,33.2,27.91,31.18,31.93,32.32,34.38,32.43,32.92,34.43,30.34,36.93,35.38,44.17,48.98,43.22,53.55,49.48,42.33,32.98,36.11,35.52,36.6,40.18,35.49,33.03,39.37,33.17,41.08,32.66,34.04,32.32,33.73,34.83,27.88,34.71	34.38	PLGELRGGGDYLGADRNYVLPSDAGGSYKEEEKNVASDANHSLHLPQPPP	PPPKTEDHDTPAPFTSIPSMMTQPLLGTVSTGIQTSTSSCQPYKVQSNGD
O15066	O15066_p_1_1	6	394	399	E	O15066_1	39	374	412	0.283	0.283	EEEEEE		33.52,40.26,32.8,35.3,34.11,29.16	33.815	IGRRKRREKRREGGGSGGGGEEEEEEGEEGEEEGDDKDD	HHHHHHHHHHHTTS S TTTHHHH	58.29,56.74,55.48,56.43,52.62,54.21,52.48,54.29,52.67,53.88,52.39,53.74,47.13,40.5,37.38,38.3,39.38,36.88,33.67,36.52,33.52,40.26,32.8,35.3,34.11,29.16,31.6,29.61,30.11,29.24,32.23,34.91,43.12,43.38,40.31,53.19,56.57,58.94,64.75	40.5	NEDPKDALLREFQEEIARLKAQLEKRSIGRRKRREKRREGGGSGGGGEEE	EEEGEEGEEEGDDKDDYWREQQEKLEIEKRAIVEDHSLVAEEKMRLLKEK	TTS HHHHHHHHHHHHHHHHHHHHHHHHHHHHHHHTTS	S TTTHHHHHHHHHHHHHHHHHHHHHH SSS HHHHHHHHHHH
O15066	O15066_p_2_1	6	725	730	S	O15066_2	49	699	747	0.63	0.63	SSSSSS		41.33,39.94,40.3,37.61,39.1,38.23	39.52	QVDASSFESTANKKSKARPKSGRKSGSSSSSSGTPASQLYPQSRGLVPK	GGGGGSSSS	39.7,39.44,37.43,44.01,49.11,39.64,40.47,42.11,40.62,36.06,37.97,38.9,34.8,36.01,38.74,38.11,36.69,37.45,37.14,40.66,38.0,43.22,39.07,41.22,42.18,41.42,41.33,39.94,40.3,37.61,39.1,38.23,37.39,41.74,40.11,44.99,41.9,43.12,41.66,36.81,43.54,36.54,38.38,41.85,39.7,45.66,42.63,49.0,42.13	39.94	PAIAPKVQAALDAALQDEDEIQVDASSFESTANKKSKARPKSGRKSGSSS	SSSGTPASQLYPQSRGLVPK||||||||||||||||||||||||||||||	S HHHHHHHHHHTS S GGGGGSSSS	||||||||||||||||||||||||||||||
O15069	O15069_p_1_1	6	332	337	E	O15069_5	39	327	365	0.691	0.691	EEEEEE	GGTSSS	43.8,45.84,46.15,39.71,42.33,38.89	43.065	TPLSPEEEEEEAVADPDPGGDLAGEGEEDSTSASFLQSL	GGGTSSSS	56.08,49.97,47.14,42.25,50.98,43.8,45.84,46.15,39.71,42.33,38.89,38.08,38.16,37.49,38.25,44.78,42.8,41.0,38.35,37.68,34.06,47.95,37.01,43.52,37.28,43.26,48.46,52.14,44.66,52.81,46.21,46.85,39.13,39.03,40.15,40.37,43.83,38.78,42.11	42.33	SSSWGQEGHFFDLDFLANDPMIPAALLPFQGSLIFQVEAVEVTPLSPEEE	EEEAVADPDPGGDLAGEGEEDSTSASFLQSLSDLSITEGMDEAFAFRDDT	GGGGGS GGG SS S GGGT	SSSS S
O15083	O15083_p_1_1	9	924	932	H	O15083_2	40	918	957	0.304	0.304	HHHHHHHHH	SS	43.48,41.57,38.18,40.09,37.78,39.35,40.25,40.77,40.19	40.19	DDHHHYHHHHHHHHHRSPGRSQHSNHRPSPDQDDEEGIWA	HHHHSSSS	54.57,53.61,50.77,47.56,49.4,45.42,43.48,41.57,38.18,40.09,37.78,39.35,40.25,40.77,40.19,37.92,38.08,41.32,39.72,41.25,41.47,42.33,42.57,41.69,42.27,44.94,43.02,45.23,41.98,44.96,47.38,45.58,46.77,45.49,53.98,53.45,52.38,48.87,48.84,47.37	43.25	SKKKKTQEEVMALKREKDRLVHQLKQQTQNRMKLMADNYDDDHHHYHHHH	HHHHHRSPGRSQHSNHRPSPDQDDEEGIWA||||||||||||||||||||	SS HHHHHHHHHHHHHHHHHHHHHHHHHHHHHHHHHHTTTHHHHSSSS	||||||||||||||||||||
O15085	O15085_p_1_1	6	151	156	P	O15085_2	48	128	175	0.738	0.738	PPPPPP		45.78,47.15,47.66,55.8,55.36,43.22	47.405	GISGLQQDPSPAGAPRITSVIPSPPPPPPLPPPQRITGPKPLQDPEVQ	HHHH	27.8,31.1,27.89,29.98,30.49,30.95,30.84,29.72,35.83,31.89,39.65,34.8,34.17,38.83,36.02,28.51,36.19,30.51,34.68,36.82,34.36,36.4,36.12,45.78,47.15,47.66,55.8,55.36,43.22,41.77,50.63,42.35,38.72,38.79,32.09,37.71,37.75,38.93,41.05,37.98,44.8,38.89,40.79,57.71,59.98,71.05,68.8,64.91	37.865	EVVKLIKSGAYVALTLLGSSPSSMGISGLQQDPSPAGAPRITSVIPSPPP	PPPLPPPQRITGPKPLQDPEVQKHATQILRNMLRQEEKELQDILPLYGDT	HHHHHHTSSSEEEEEEEEE	HHHHHHHHHHHHHHHHHHHHHHHSSS SS
O15105	O15105_p_1_1	7	29	35	G	O15105_1	43	13	55	0.638	0.638	GGGGGGG		33.77,34.46,34.37,34.89,35.3,36.41,37.54	34.89	LWRSRAPGGEDEEEGAGGGGGGGELRGEGATDSRAHGAGGGGP	HHHTS TT	97.17,95.3,95.18,94.48,94.09,90.17,79.36,59.43,43.81,41.66,37.69,35.09,36.07,33.98,35.49,36.0,33.77,34.46,34.37,34.89,35.3,36.41,37.54,36.08,41.83,36.96,44.06,39.32,40.13,40.38,44.42,39.48,42.51,40.31,44.24,44.95,39.62,39.82,38.79,36.74,36.64,38.19,40.87	39.62	|||||||||||||||||||MFRTKRSALVRRLWRSRAPGGEDEEEGAGGG	GGGGELRGEGATDSRAHGAGGGGPGRAGCCLGKAVRGAKGHHHPHPPAAG	||||||||||||||||||| HHHHHHHHHHHTS TT	S
O15156	O15156_p_1_1	8	187	194	P	O15156_1	138	171	308	0.66	0.66	PPPPPPPP		43.08,53.03,44.18,43.68,52.16,49.42,44.41,46.59	45.5	ASGVPNGEDSPPQVPLPPPPPPPPRPVARRSRKPRKAFLQTKGARANHLVPEVPTVPAHPLTYEEEEVAGRVGSSGGSGPGDSYSPPTGTASPPEGPQSYEPYEGEEEEEELVYPPAYGLAQGGGPPLSPEELGSDED	S	37.21,36.02,31.2,31.39,37.23,31.17,34.05,32.23,37.32,40.05,41.13,37.56,39.85,44.81,45.76,41.82,43.08,53.03,44.18,43.68,52.16,49.42,44.41,46.59,45.38,42.71,43.5,36.34,37.89,36.14,38.43,38.99,41.34,38.41,37.37,42.19,38.51,33.03,42.16,36.41,41.43,39.38,32.91,36.86,34.18,33.13,37.23,31.38,36.54,36.61,38.79,35.9,35.24,40.43,33.14,38.78,36.35,30.27,35.49,32.88,36.64,30.48,37.65,38.16,33.79,39.6,35.06,4…	36.945	LQGSGLEAPSPDEDDCERARQYLEAFATATASGVPNGEDSPPQVPLPPPP	PPPPRPVARRSRKPRKAFLQTKGARANHLVPEVPTVPAHPLTYEEEEVAG	HHHHT HHHHHHHHHHHHHHHHHTS
O15156	O15156_p_2_1	6	276	281	E	O15156_1	138	171	308	0.66	0.66	EEEEEE		32.87,34.5,35.55,36.02,32.93,38.22	35.025	ASGVPNGEDSPPQVPLPPPPPPPPRPVARRSRKPRKAFLQTKGARANHLVPEVPTVPAHPLTYEEEEVAGRVGSSGGSGPGDSYSPPTGTASPPEGPQSYEPYEGEEEEEELVYPPAYGLAQGGGPPLSPEELGSDED	S	37.21,36.02,31.2,31.39,37.23,31.17,34.05,32.23,37.32,40.05,41.13,37.56,39.85,44.81,45.76,41.82,43.08,53.03,44.18,43.68,52.16,49.42,44.41,46.59,45.38,42.71,43.5,36.34,37.89,36.14,38.43,38.99,41.34,38.41,37.37,42.19,38.51,33.03,42.16,36.41,41.43,39.38,32.91,36.86,34.18,33.13,37.23,31.38,36.54,36.61,38.79,35.9,35.24,40.43,33.14,38.78,36.35,30.27,35.49,32.88,36.64,30.48,37.65,38.16,33.79,39.6,35.06,4…	36.945	HPLTYEEEEVAGRVGSSGGSGPGDSYSPPTGTASPPEGPQSYEPYEGEEE	EEELVYPPAYGLAQGGGPPLSPEELGSDEDAIDPDLMAYLSSLHQDNLAP		HHHHHHHHHHHHTT SS
O15197	O15197_p_1_1	11	166	176	S	O15197_1	20	163	182	0.894	0.894	SSSSSSSSSSS		49.08,40.27,33.56,27.71,30.17,30.62,29.79,29.7,28.54,28.53,26.73	29.79	SFPSSSSSSSSSSSAAWAVG	B	71.01,64.07,57.47,49.08,40.27,33.56,27.71,30.17,30.62,29.79,29.7,28.54,28.53,26.73,28.0,26.44,26.57,25.59,29.75,28.65	29.725	GGTCRETFTLYYRQAEEPDSPDSVSSWHLKRWTKVDTIAADESFPSSSSS	SSSSSSAAWAVGPHGAGQRAGLQLNVKERSFGPLTQRGFYVAFQDTGACL	STT BSEEEEEEEEESS GGGGGTGGGS EEEEEEE S B	S EEEEEEE SSEEEEEEEESSBEE
O15209	O15209_p_1_1	7	320	326	E	O15209_2	154	308	461	0.733	0.733	EEEEEEE		38.91,39.2,39.2,43.8,38.42,45.41,38.68	39.2	APTPLVPQDPDLEEEEEEEDLVLTCEDDEDEELGGSSRVPVGGGPEATLSISDVRTLSEPPDKGEEQVNFCESSNDFGPYEGGGPVAGLDDSGGPTPSSYAPSHPPRPLLPLDMQGNQILVFPSSSSSSSSQAPGQPPGNQAEHGAVTVGGTSV	S	27.39,34.53,30.23,30.93,33.83,34.52,37.29,34.87,32.15,38.68,34.94,40.09,38.91,39.2,39.2,43.8,38.42,45.41,38.68,40.63,40.19,35.52,35.55,35.91,34.26,40.74,37.01,42.16,42.37,42.09,45.23,50.01,41.83,35.68,32.91,35.2,32.5,36.52,41.57,39.53,41.8,36.99,38.34,41.81,44.67,38.31,37.52,38.66,34.34,36.74,33.25,31.62,34.12,35.34,37.51,32.4,32.61,33.63,32.79,41.29,42.53,37.58,36.59,38.66,36.29,38.97,33.49,34.5…	36.395	GAVVPGAGLRRPTYTPPSIMPQKHWVYVKRGGNCPAPTPLVPQDPDLEEE	EEEEDLVLTCEDDEDEELGGSSRVPVGGGPEATLSISDVRTLSEPPDKGE
O15209	O15209_p_2_1	8	431	438	S	O15209_2	154	308	461	0.733	0.733	SSSSSSSS		27.8,33.42,32.92,33.85,33.73,33.36,34.31,38.06	33.575	APTPLVPQDPDLEEEEEEEDLVLTCEDDEDEELGGSSRVPVGGGPEATLSISDVRTLSEPPDKGEEQVNFCESSNDFGPYEGGGPVAGLDDSGGPTPSSYAPSHPPRPLLPLDMQGNQILVFPSSSSSSSSQAPGQPPGNQAEHGAVTVGGTSV	S	27.39,34.53,30.23,30.93,33.83,34.52,37.29,34.87,32.15,38.68,34.94,40.09,38.91,39.2,39.2,43.8,38.42,45.41,38.68,40.63,40.19,35.52,35.55,35.91,34.26,40.74,37.01,42.16,42.37,42.09,45.23,50.01,41.83,35.68,32.91,35.2,32.5,36.52,41.57,39.53,41.8,36.99,38.34,41.81,44.67,38.31,37.52,38.66,34.34,36.74,33.25,31.62,34.12,35.34,37.51,32.4,32.61,33.63,32.79,41.29,42.53,37.58,36.59,38.66,36.29,38.97,33.49,34.5…	36.395	GPYEGGGPVAGLDDSGGPTPSSYAPSHPPRPLLPLDMQGNQILVFPSSSS	SSSSQAPGQPPGNQAEHGAVTVGGTSVGSLGVPGSVGGVPGGTGSGDGNK	S
O15211	O15211_p_1_1	9	44	52	E	O15211_1	54	1	54	0.733	0.733	EEEEEEEEE		33.77,33.68,32.89,34.03,35.68,35.6,44.5,49.35,54.22	35.6	MLPRPLRLLLDTSPPGGVVLSSFRSRDPEEGGGPGGLVVGGGQEEEEEEEEEAP	HHHHHHH S	31.66,32.75,38.36,32.74,35.17,35.2,37.17,35.65,35.0,36.97,29.85,33.85,31.82,38.19,33.4,29.53,26.39,25.95,25.86,26.88,25.35,27.86,25.7,27.25,26.92,28.66,30.16,33.61,35.45,37.56,34.94,35.44,36.16,38.46,37.05,35.19,34.69,35.06,35.41,34.25,31.5,29.57,32.02,33.77,33.68,32.89,34.03,35.68,35.6,44.5,49.35,54.22,63.08,77.87	34.14	|||MLPRPLRLLLDTSPPGGVVLSSFRSRDPEEGGGPGGLVVGGGQEEEE	EEEEEAPVSVWDEEEDGAVFTVTSRQYRPLDPLVPMPPPRSSRRLRAGTL	||| HHHHHHH S	EEEEEEEETTEEEEEEEE SSTTS EEEEEEEEE H
O15231	O15231_p_1_1	7	159	165	E	O15231_1	253	1	253	0.647	0.647	EEEEEEE		45.66,44.63,44.86,39.66,47.51,50.99,49.77	45.66	MSISALGGRTKGKPLPPGEEERNNVLKQMKVRTTLKGDKSWITKQDESEGRTIELPSGRSRATSFSSAGEVPKPRPPSTRAPTGYIIRGVFTKPIDSSSQPQQQFPKANGTPKSAASLVRTANAGPPRPSSSGYKMTTEDYKKLAPYNIRRSSTSGDTEEEEEEEVVPFSSDEQKRRSEAASGVLRRTAPREHSYVLSAAKKSTGPTQETQAPFIAKRVEVVEEDGPSEKSQDPPALARSTPGSNSADGGRTK	HHHHHHHHHHHHHHTS S EEETTEEE TT HHHHHHH GGG HHHHHHHHHHHHHHHHHHTTT TT SSS	40.33,36.79,45.07,40.58,41.17,50.76,39.64,40.93,41.51,53.98,49.12,54.2,61.87,56.49,59.24,69.04,64.29,68.31,74.43,79.28,79.66,80.45,80.31,82.09,78.83,77.19,78.81,74.03,70.21,65.33,59.79,54.61,59.14,56.07,56.86,61.99,60.08,54.56,51.39,64.35,65.88,62.21,48.8,52.13,40.75,46.08,44.98,50.33,45.55,44.14,44.22,37.85,43.11,42.48,42.44,45.56,44.01,35.15,42.21,35.83,42.48,31.92,39.28,32.16,40.83,36.67,41.03…	47.51	PKSAASLVRTANAGPPRPSSSGYKMTTEDYKKLAPYNIRRSSTSGDTEEE	EEEEVVPFSSDEQKRRSEAASGVLRRTAPREHSYVLSAAKKSTGPTQETQ	HHHHHHH GGG	HHHHHHHHHHHHHHHHHHTTT TT SSS
O15234	O15234_p_1_1	6	643	648	P	O15234_3	71	633	703	0.667	0.667	PPPPPP		69.8,72.46,72.78,68.72,61.7,53.61	69.26	PSYPYAPGALPPPPPPHLYPNTQAPSQVYGGVTYYNPAQQQVQPKPSPPRRTPQPVTIKPPPPEVVSRGSS	TT SS EEETTEEE GGG S	56.11,53.67,50.82,62.96,51.28,59.51,57.96,62.97,57.2,63.49,69.8,72.46,72.78,68.72,61.7,53.61,46.55,42.62,34.9,43.44,39.98,43.98,51.49,53.61,56.21,66.41,68.94,74.05,64.03,73.1,79.51,72.1,81.19,75.61,73.53,75.53,69.09,67.91,62.06,59.34,57.14,57.21,63.19,65.25,68.13,71.13,73.92,78.13,79.33,75.49,72.77,76.63,76.15,75.41,73.26,72.77,72.02,76.3,80.35,80.89,81.54,80.94,79.18,77.01,70.74,62.62,61.32,49.7…	67.91	NPGLYPPPVSMSPGQPPPQQLLAPTYFSAPGVMNFGNPSYPYAPGALPPP	PPPHLYPNTQAPSQVYGGVTYYNPAQQQVQPKPSPPRRTPQPVTIKPPPP	S TT	SS EEETTEEE GGG S
O15259	O15259_p_1_1	6	137	142	E	O15259_1	51	103	153	0.4	0.4	EEEEEE	HHHHHH	37.95,40.18,36.76,36.31,37.77,39.81	37.86	ISRENITEVGAPTEEEEESESEDSEDSGGEEEDAEEEEEEKEENESHKWST	HHHHT SSHHHHHHHHHHSS	82.62,76.23,73.95,66.45,56.4,48.77,37.79,37.04,31.32,29.75,28.31,32.99,31.4,28.98,33.49,31.67,33.98,31.06,33.67,32.14,35.91,34.04,35.5,40.11,36.27,33.76,36.88,30.52,33.73,36.93,37.87,39.27,40.09,37.06,37.95,40.18,36.76,36.31,37.77,39.81,36.8,34.35,35.3,34.23,31.0,31.66,30.32,31.06,27.77,31.98,50.07	35.5	DKLTQQLQGLAVTISRENITEVGAPTEEEEESESEDSEDSGGEEEDAEEE	EEEKEENESHKWSTGEEYIAVGDFTAQQVGDLTFKKGEILLVIEKKPDGW	HHHHHHHHHHHHHHHHHT SSHHHHH	HHHHHSS EEEEESS B STTB B TT EEEEEE TTSE
O15265	O15265_p_1_1	6	23	28	A	O15265_1	74	1	74	0.562	0.562	AAAAAA	HHHHHH	63.12,64.63,63.4,68.1,72.07,70.89	66.365	MSERAADDVRGEPRRAAAAAGGAAAAAARQQQQQQQQQQPPPPQPQRQQHPPPPPRRTRPEDGGPGAASTSAAA	SSHHHHHHHHHHHHHHHHHHHTTSS S	43.68,39.87,41.65,41.13,50.45,44.32,48.4,49.73,42.48,49.81,42.94,45.48,47.55,54.55,52.74,52.91,52.87,53.37,54.33,55.88,55.87,56.3,63.12,64.63,63.4,68.1,72.07,70.89,71.95,76.04,74.51,73.68,73.48,74.33,70.05,65.27,66.04,66.93,56.47,72.27,73.98,69.9,62.57,58.43,59.8,48.79,37.93,47.02,47.87,50.5,64.91,65.67,68.35,64.19,56.74,40.67,43.09,46.31,42.67,53.26,43.47,45.13,38.65,37.12,42.05,37.65,41.76,43.0…	52.805	|||||||||||||||||||||||||MSERAADDVRGEPRRAAAAAGGAAA	AAARQQQQQQQQQQPPPPQPQRQQHPPPPPRRTRPEDGGPGAASTSAAAM	||||||||||||||||||||||||| SSHHHHHHHHH	HHHHHHHHHHTTSS S
O15265	O15265_p_2_1	10	30	39	Q	O15265_1	74	1	74	0.562	0.562	QQQQQQQQQQ	HHHHHHTTSS	76.04,74.51,73.68,73.48,74.33,70.05,65.27,66.04,66.93,56.47	71.765	MSERAADDVRGEPRRAAAAAGGAAAAAARQQQQQQQQQQPPPPQPQRQQHPPPPPRRTRPEDGGPGAASTSAAA	SSHHHHHHHHHHHHHHHHHHHTTSS S	43.68,39.87,41.65,41.13,50.45,44.32,48.4,49.73,42.48,49.81,42.94,45.48,47.55,54.55,52.74,52.91,52.87,53.37,54.33,55.88,55.87,56.3,63.12,64.63,63.4,68.1,72.07,70.89,71.95,76.04,74.51,73.68,73.48,74.33,70.05,65.27,66.04,66.93,56.47,72.27,73.98,69.9,62.57,58.43,59.8,48.79,37.93,47.02,47.87,50.5,64.91,65.67,68.35,64.19,56.74,40.67,43.09,46.31,42.67,53.26,43.47,45.13,38.65,37.12,42.05,37.65,41.76,43.0…	52.805	||||||||||||||||MSERAADDVRGEPRRAAAAAGGAAAAAARQQQQQ	QQQQQPPPPQPQRQQHPPPPPRRTRPEDGGPGAASTSAAAMATVGERRPL	|||||||||||||||| SSHHHHHHHHHHHHHHHHHH	HTTSS S SS
O15265	O15265_p_3_1	6	647	652	S	O15265_5	115	616	730	0.693	0.693	SSSSSS		36.8,39.3,40.29,38.64,42.59,39.49	39.395	KSVPAHGTTLNAQPAASGAMDPVCSMQSRQVSSSSSSPSTPSGLSSVPSSPMSRKPQKLKSSKSLRPKESSGNSTNCQNASSSTSGGSGKKRKNSSPLLVHSSSSSSSSSSSSHS		34.33,38.15,37.28,38.96,39.76,38.1,37.91,49.0,40.42,46.33,41.99,42.35,36.13,44.65,36.04,40.76,39.55,38.7,39.5,44.72,36.46,47.39,38.03,31.12,37.5,40.55,41.01,38.4,40.57,38.05,39.19,36.8,39.3,40.29,38.64,42.59,39.49,47.77,39.01,38.92,44.15,39.03,39.2,43.68,34.1,39.7,42.92,45.12,36.9,38.92,44.9,40.97,43.25,45.59,40.66,52.0,47.4,43.58,47.34,44.29,45.36,43.93,41.75,38.16,41.82,35.96,46.73,39.55,38.28,…	39.19	STSPVLLSSTCISPNSKSVPAHGTTLNAQPAASGAMDPVCSMQSRQVSSS	SSSPSTPSGLSSVPSSPMSRKPQKLKSSKSLRPKESSGNSTNCQNASSST
O15265	O15265_p_4_1	12	717	728	S	O15265_5	115	616	730	0.693	0.693	SSSSSSSSSSSS		31.55,30.34,29.51,30.34,32.25,31.45,36.09,30.35,35.4,31.13,36.58,32.84	31.5	KSVPAHGTTLNAQPAASGAMDPVCSMQSRQVSSSSSSPSTPSGLSSVPSSPMSRKPQKLKSSKSLRPKESSGNSTNCQNASSSTSGGSGKKRKNSSPLLVHSSSSSSSSSSSSHS		34.33,38.15,37.28,38.96,39.76,38.1,37.91,49.0,40.42,46.33,41.99,42.35,36.13,44.65,36.04,40.76,39.55,38.7,39.5,44.72,36.46,47.39,38.03,31.12,37.5,40.55,41.01,38.4,40.57,38.05,39.19,36.8,39.3,40.29,38.64,42.59,39.49,47.77,39.01,38.92,44.15,39.03,39.2,43.68,34.1,39.7,42.92,45.12,36.9,38.92,44.9,40.97,43.25,45.59,40.66,52.0,47.4,43.58,47.34,44.29,45.36,43.93,41.75,38.16,41.82,35.96,46.73,39.55,38.28,…	39.19	KLKSSKSLRPKESSGNSTNCQNASSSTSGGSGKKRKNSSPLLVHSSSSSS	SSSSSSHSMESFRKNCVAHSGPPYPSTVTSSHSIGLNCVTNKANAVNVRH
O15266	O15266_p_1_1	8	21	28	G	O15266_1	34	1	34	0.679	0.679	GGGGGGGG		47.13,40.63,41.2,36.36,40.43,39.86,39.77,50.01	40.53	MEELTAFVSKSFDQKSKDGNGGGGGGGGKKDSIT		41.16,49.26,54.41,57.76,58.11,54.0,50.35,49.77,50.76,59.59,50.24,52.91,62.26,46.96,57.24,46.35,65.12,46.98,53.77,44.32,47.13,40.63,41.2,36.36,40.43,39.86,39.77,50.01,53.44,58.86,57.48,63.5,69.13,77.71	50.555	||||||||||||||||||||||||||MEELTAFVSKSFDQKSKDGNGGGG	GGGGKKDSITYREVLESGLARSRELGTSDSSLQDITEGGGHCPVHLFKDH	||||||||||||||||||||||||||	HHHHHHHHHHTTTTT
O15318	O15318_p_1_1	7	175	181	D	O15318_1	114	110	223	0.422	0.422	DDDDDDD		32.22,36.45,39.45,39.03,40.32,39.64,42.09	39.45	MMPRNKCKKAGPKPKKAKDAGKGTPLTNTEDVLKKMEELEKRGDGEKSDEENEEKEGSKEKSKEGDDDDDDDAAEQEEYDEEEQEEENDYINSYFEDGDDFGADSDDNMDEATY	TS S HHHHHHHHHHHHHH S TTTTTSS THHHHTTTS TT S	84.88,83.14,81.54,79.31,72.18,68.73,57.34,61.56,57.14,55.11,49.35,52.12,47.1,49.0,46.57,35.82,40.92,34.48,36.84,36.16,36.87,35.65,38.93,47.09,50.21,52.72,56.6,58.98,72.64,76.59,78.45,86.74,87.02,88.82,90.8,89.12,84.71,87.33,81.93,77.71,79.55,66.54,50.22,45.05,35.21,40.74,32.43,33.81,29.6,32.6,29.52,33.09,27.95,32.9,33.3,29.01,25.13,31.66,31.61,29.79,30.05,37.05,32.99,32.02,30.19,32.22,36.45,39.45…	52.57	DAGKGTPLTNTEDVLKKMEELEKRGDGEKSDEENEEKEGSKEKSKEGDDD	DDDDAAEQEEYDEEEQEEENDYINSYFEDGDDFGADSDDNMDEATY||||	S HHHHHHHHHHHHHH S	TTTTTSS THHHHTTTS TT S ||||
O15347	O15347_p_1_1	14	185	198	E	O15347_2	40	161	200	0.338	0.338	EEEEEEEEEEEEEE	HHHHHHHHHHHHHH	48.41,42.37,41.65,41.49,39.38,41.14,43.41,43.23,40.27,41.9,45.42,44.04,44.54,44.96	42.8	KSKGKFDGAKGPAKVARKKVEEEDEEEEEEEEEEEEEEDE	HHHGGGS TTHHHHHHHHHHHHHHHHHHHHHHH	85.47,85.64,79.27,64.31,53.54,44.24,41.57,34.75,34.75,31.8,30.22,41.63,41.1,41.83,38.67,41.62,44.5,42.38,41.7,48.68,46.79,39.7,41.83,39.48,48.41,42.37,41.65,41.49,39.38,41.14,43.41,43.23,40.27,41.9,45.42,44.04,44.54,44.96,43.57,45.54	42.135	YITKAAKLKEKYEKDVADYKSKGKFDGAKGPAKVARKKVEEEDEEEEEEE	EEEEEEEDE|||||||||||||||||||||||||||||||||||||||||	HHHHHHHHHHHHHHHHHHHHHHGGGS TTHHHHHHHHHHHHHHHH	HHHHHHH |||||||||||||||||||||||||||||||||||||||||
O15355	O15355_p_1_1	6	306	311	E	O15355_2	168	161	328	0.516	0.516	EEEEEE	TTS	46.21,43.86,44.79,43.33,41.73,44.49	44.175	GQNCHKGPPHSKSGGGTGEEPGSQGLNGEAGPEDSTRETPSQENGPTAKAYTGFSSNSERGTEAGQVGEPGIPTGEAGPSCSSASDKLPRVAKSKFFEDSEDESDEAEEEEEDSEECSEEEDGYSSEEAENEEDEDDTEEAEEDDEEEEEEMMVPGMEGKEEPGSDSG	TTS TT SS TTTS E	60.48,51.61,46.27,36.07,39.49,38.8,31.61,45.84,38.28,39.19,37.5,35.65,36.42,33.6,31.88,33.42,31.73,32.24,30.53,34.5,39.78,29.49,31.76,32.79,29.72,29.33,25.76,30.11,36.52,33.04,37.49,41.98,39.52,37.9,38.23,38.04,35.17,37.91,33.28,42.37,38.51,39.95,39.89,39.41,35.0,37.76,30.5,35.46,36.88,30.7,32.17,30.45,33.1,28.41,35.88,32.85,30.98,36.09,35.44,31.52,31.81,29.13,36.16,31.2,31.48,33.8,30.86,32.73,38…	39.415	DSEDESDEAEEEEEDSEECSEEEDGYSSEEAENEEDEDDTEEAEEDDEEE	EEEMMVPGMEGKEEPGSDSGTTAVVALIRGKQLIVANAGDSRCVVSEAGK	T	TS TT SS TTTS EE EEEEEEETTEEEEEEESS EEEEEETTE
O15370	O15370_p_1_1	7	211	217	A	O15370_2	189	100	288	0.656	0.656	AAAAAAA		44.49,39.84,40.96,41.53,38.7,40.26,47.64	40.96	HMADYPDYKYRPRKKSKGAPAKARPRPPGGSGGGSRLKPGPQLPGRGGRRAAGGPLGGGAAAPEDDDEDDDEELLEVRLVETPGRELWRMVPAGRAARGQAERAQGPSGEGAAAAAAASPTPSEDEEPEEEEEEAAAAEEGEEETVASGEESLGFLSRLPPGPAGLDCSALDRDPDLQPPSGTSHFEFP	HHHH TT TTS S EEEEEEEEETTEEEEEEEEET S	95.31,94.88,95.29,93.66,92.77,93.66,93.29,94.66,93.83,94.37,92.17,92.68,90.27,92.15,86.37,82.03,71.66,60.9,56.75,58.52,54.84,53.13,46.91,58.32,52.43,54.81,60.78,50.86,50.23,44.63,48.53,42.06,41.1,44.78,50.25,52.54,53.53,52.36,46.5,51.59,54.93,45.18,56.4,57.55,43.74,52.52,42.36,47.91,52.5,43.63,50.78,50.96,43.41,43.29,44.09,44.68,41.7,38.69,39.19,33.29,41.06,49.29,53.62,46.42,47.95,44.69,45.61,45.…	49.78	DDDEDDDEELLEVRLVETPGRELWRMVPAGRAARGQAERAQGPSGEGAAA	AAAASPTPSEDEEPEEEEEEAAAAEEGEEETVASGEESLGFLSRLPPGPA	EEEEEEEEETTEEEEEEEEET
O15370	O15370_p_2_1	6	228	233	E	O15370_2	189	100	288	0.656	0.656	EEEEEE		52.08,42.67,51.36,47.31,55.79,44.07	49.335	HMADYPDYKYRPRKKSKGAPAKARPRPPGGSGGGSRLKPGPQLPGRGGRRAAGGPLGGGAAAPEDDDEDDDEELLEVRLVETPGRELWRMVPAGRAARGQAERAQGPSGEGAAAAAAASPTPSEDEEPEEEEEEAAAAEEGEEETVASGEESLGFLSRLPPGPAGLDCSALDRDPDLQPPSGTSHFEFP	HHHH TT TTS S EEEEEEEEETTEEEEEEEEET S	95.31,94.88,95.29,93.66,92.77,93.66,93.29,94.66,93.83,94.37,92.17,92.68,90.27,92.15,86.37,82.03,71.66,60.9,56.75,58.52,54.84,53.13,46.91,58.32,52.43,54.81,60.78,50.86,50.23,44.63,48.53,42.06,41.1,44.78,50.25,52.54,53.53,52.36,46.5,51.59,54.93,45.18,56.4,57.55,43.74,52.52,42.36,47.91,52.5,43.63,50.78,50.96,43.41,43.29,44.09,44.68,41.7,38.69,39.19,33.29,41.06,49.29,53.62,46.42,47.95,44.69,45.61,45.…	49.78	TPGRELWRMVPAGRAARGQAERAQGPSGEGAAAAAAASPTPSEDEEPEEE	EEEAAAAEEGEEETVASGEESLGFLSRLPPGPAGLDCSALDRDPDLQPPS	ETTEEEEEEEEET	S
O15371	O15371_p_1_1	15	533	547	E	O15371_1	26	523	548	0.258	0.258	EEEEEEEEEEEEEEE	HHHHHHHHHHHHHH	48.02,51.24,56.82,58.49,59.25,62.35,63.61,67.06,66.24,67.49,69.01,70.89,69.92,68.55,65.8	65.8	PDGTFSSDEDEEEEEEEEEEEEEEET	TTTT HHHHHHHHHHHHHHHHH	91.53,83.13,81.93,81.86,83.72,71.75,60.15,44.77,46.9,52.47,48.02,51.24,56.82,58.49,59.25,62.35,63.61,67.06,66.24,67.49,69.01,70.89,69.92,68.55,65.8,55.96	66.02	ILRCVIDICMKLEEGKYLILKDPNKQVIRVYSLPDGTFSSDEDEEEEEEE	EEEEEEEET|||||||||||||||||||||||||||||||||||||||||	HHHHHHHHHTTS SEEEEEEE SSSSEEEEEEE TTTT HHHHHHHHHH	HHHHHHH |||||||||||||||||||||||||||||||||||||||||
O15405	O15405_p_1_1	6	245	250	K	O15405_1	70	189	258	0.517	0.517	KKKKKK		49.4,48.4,51.53,49.09,44.88,55.86	49.245	NLGGASMPHTSPSPPASKSATPSPSSSINEEDADEANRAIGEKRAAPDSGKKPKTPKKKKKKDPNEPQKP	TTS	36.82,45.8,38.28,36.25,40.96,42.27,56.97,42.47,48.56,45.62,39.49,51.63,46.69,68.17,54.7,43.54,54.46,49.48,52.94,46.97,55.96,51.56,43.99,54.03,43.35,44.68,47.61,54.01,45.14,49.29,53.28,48.3,51.66,49.73,40.25,46.48,43.53,43.82,41.8,51.19,44.84,50.15,46.89,44.11,41.49,46.96,47.98,44.47,47.96,45.65,49.99,51.63,49.74,49.41,46.74,54.35,49.4,48.4,51.53,49.09,44.88,55.86,54.34,66.54,65.98,73.87,81.87,84.…	48.48	TSPSPPASKSATPSPSSSINEEDADEANRAIGEKRAAPDSGKKPKTPKKK	KKKDPNEPQKPVSAYALFFRDTQAAIKGQNPNATFGEVSKIVASMWDSLG		TTS HHHHHHHHHHHHHHHH TT HHHHHHHHHHHHHTS
O15446	O15446_p_1_1	6	212	217	K	O15446_3	308	203	510	0.562	0.562	KKKKKK		51.57,45.4,44.62,42.58,43.96,39.85	44.29	LGSPEMDVRKKKKKKNQQLKEPEAAGPVGTEPTVETLEPLGVLFPSTTKKRKKPKGKETFEPEDKTVKQEQINTEPLEDTVLSPTKKRKRQKGTEGMEPEEGVTVESQPQVKVEPLEEAIPLPPTKKRKKEKGQMAMMEPGTEAMEPVEPEMKPLESPGGTMAPQQPEGAKPQAQAALAAPKKKTKKEKQQDATVEPETEVVGPELPDDLEPQAAPTSTKKKKKKKERGHTVTEPIQPLEPELPGEGQPEARATPGSTKKRKKQSQESRMPETVPQEEMPGPPLNSESGEEAPTGRDKKRKQQQQQPV		47.44,36.04,34.46,46.71,36.49,61.65,41.22,49.46,45.69,51.57,45.4,44.62,42.58,43.96,39.85,38.92,42.61,37.43,41.57,37.55,32.26,46.63,30.57,43.28,42.15,37.52,41.12,41.6,40.99,42.61,44.9,45.04,38.52,44.2,45.68,44.82,45.85,45.8,42.74,41.12,39.57,48.33,41.78,41.76,56.36,39.86,36.82,46.06,52.85,45.13,47.66,44.21,40.39,40.55,36.27,34.33,37.94,33.06,31.47,30.9,31.64,37.47,32.38,32.34,37.0,32.88,35.26,37.2…	42.15	LAPNLLTSGKKKKEMQVTEAPVTQEAVNGHGALEVDMALGSPEMDVRKKK	KKKNQQLKEPEAAGPVGTEPTVETLEPLGVLFPSTTKKRKKPKGKETFEP
O15446	O15446_p_2_1	7	422	428	K	O15446_3	308	203	510	0.562	0.562	KKKKKKK		51.16,41.27,51.69,42.15,44.39,45.58,45.06	45.06	LGSPEMDVRKKKKKKNQQLKEPEAAGPVGTEPTVETLEPLGVLFPSTTKKRKKPKGKETFEPEDKTVKQEQINTEPLEDTVLSPTKKRKRQKGTEGMEPEEGVTVESQPQVKVEPLEEAIPLPPTKKRKKEKGQMAMMEPGTEAMEPVEPEMKPLESPGGTMAPQQPEGAKPQAQAALAAPKKKTKKEKQQDATVEPETEVVGPELPDDLEPQAAPTSTKKKKKKKERGHTVTEPIQPLEPELPGEGQPEARATPGSTKKRKKQSQESRMPETVPQEEMPGPPLNSESGEEAPTGRDKKRKQQQQQPV		47.44,36.04,34.46,46.71,36.49,61.65,41.22,49.46,45.69,51.57,45.4,44.62,42.58,43.96,39.85,38.92,42.61,37.43,41.57,37.55,32.26,46.63,30.57,43.28,42.15,37.52,41.12,41.6,40.99,42.61,44.9,45.04,38.52,44.2,45.68,44.82,45.85,45.8,42.74,41.12,39.57,48.33,41.78,41.76,56.36,39.86,36.82,46.06,52.85,45.13,47.66,44.21,40.39,40.55,36.27,34.33,37.94,33.06,31.47,30.9,31.64,37.47,32.38,32.34,37.0,32.88,35.26,37.2…	42.15	QAQAALAAPKKKTKKEKQQDATVEPETEVVGPELPDDLEPQAAPTSTKKK	KKKKERGHTVTEPIQPLEPELPGEGQPEARATPGSTKKRKKQSQESRMPE
O15457	O15457_p_1_1	6	64	69	S	O15457_1	83	1	83	0.733	0.733	SSSSSS		28.06,24.55,27.2,25.1,27.94,27.63	27.415	MLRPEISSTSPSAPAVSPSSGETRSPQGPRYNFGLQETPQSRPSVQVVSASTCPGTSGAAGDRSSSSSSLPCPAPNSRPAQGS		28.39,32.77,26.27,33.48,29.49,31.45,32.17,31.4,27.03,28.43,34.45,26.6,28.81,33.71,26.3,30.47,28.33,38.85,29.31,25.52,30.8,24.75,24.29,26.43,23.85,29.82,26.1,27.02,30.18,24.48,28.67,24.16,25.93,24.11,27.32,26.11,24.61,24.79,26.92,25.33,25.65,24.86,27.79,25.53,25.91,23.68,25.57,25.06,25.88,27.75,26.19,24.19,24.77,29.64,24.09,27.42,24.17,26.64,28.26,27.07,27.16,23.65,27.3,28.06,24.55,27.2,25.1,27.94…	27.07	SPSSGETRSPQGPRYNFGLQETPQSRPSVQVVSASTCPGTSGAAGDRSSS	SSSLPCPAPNSRPAQGSYFGNKRAYAENTVASNFTFGASSSSARDTNYPQ
O15479	O15479_p_1_1	6	69	74	A	O15479_1	112	1	112	0.648	0.648	AAAAAA		41.68,39.96,39.96,42.59,43.42,46.03	42.135	MPRGQKSKLRAREKRRKARDETRGLNVPQVTEAEEEEAPCCSSSVSGGAASSSPAAGIPQEPQRAPTTAAAAAAGVSSTKSKKGAKSHQGEKNASSSQASTSTKSPSEDPLT	TTHHHHHHHHHHHHHHHHHTTS TTH	52.04,60.25,60.74,64.18,63.64,67.49,71.44,72.81,73.76,76.51,78.31,79.33,80.13,79.63,80.52,78.12,78.6,69.75,71.32,68.45,64.7,59.2,57.38,51.92,51.13,42.28,45.81,40.09,33.14,40.67,35.91,38.33,40.83,43.72,43.43,44.18,42.66,42.32,43.01,30.76,37.18,36.57,40.62,45.24,42.52,47.64,48.72,43.42,43.84,41.61,48.98,44.07,48.68,52.97,39.4,40.16,40.77,43.35,49.16,39.17,38.4,42.91,35.7,41.92,37.21,48.0,37.89,37.4…	44.745	TRGLNVPQVTEAEEEEAPCCSSSVSGGAASSSPAAGIPQEPQRAPTTAAA	AAAGVSSTKSKKGAKSHQGEKNASSSQASTSTKSPSEDPLTRKSGSLVQF	TTS	TTHHHHHHHHHH
O15524	O15524_p_1_1	7	26	32	S	O15524_1	53	1	53	0.744	0.744	SSSSSSS		53.47,54.24,49.46,55.36,51.66,53.25,57.83	53.47	MVAHNQVAADNAVSTAAEPRRRPEPSSSSSSSPAAPARPRPCPAVPAPAPGDT	TT	43.23,41.74,39.02,54.98,53.9,56.38,45.06,52.61,44.21,55.07,44.04,45.2,48.52,42.47,45.91,49.28,49.0,53.67,52.04,48.15,48.54,57.38,50.31,57.08,50.04,53.47,54.24,49.46,55.36,51.66,53.25,57.83,47.08,54.81,59.56,61.97,60.68,63.97,63.42,66.47,59.82,55.54,60.25,60.22,64.87,61.04,62.38,55.18,51.07,52.99,56.27,55.16,68.97	53.9	||||||||||||||||||||||MVAHNQVAADNAVSTAAEPRRRPEPSSS	SSSSPAAPARPRPCPAVPAPAPGDTHFRTFRSHADYRRITRASALLDACG	||||||||||||||||||||||	TT SS SSHHHHHHHHHHHHHHHHHS
O43151	O43151_p_1_1	6	1632	1637	E	O43151_8	31	1608	1638	0.549	0.549	EEEEEE		35.53,38.59,39.26,46.87,42.73,49.72	40.995	LEEGPAEEPPSKGAVKEEKGGGGAEEEEEEL		29.4,28.72,29.97,35.82,40.35,30.41,30.17,29.62,41.37,39.3,35.32,35.8,34.27,33.1,33.52,36.72,34.63,36.07,37.14,32.13,31.3,31.26,30.53,31.38,35.53,38.59,39.26,46.87,42.73,49.72,52.1	35.32	PLGSSEKLFGALKSEEKLWDPFSLEEGPAEEPPSKGAVKEEKGGGGAEEE	EEELWSDSEHNFLDENIGGVAVAPAHGSILIECARRELHATTPLKKPNRC		B THHHH TTB EEE TTEEEEE TTTS BEE SS TT
O43159	O43159_p_1_1	6	65	70	E	O43159_2	182	52	233	0.513	0.513	EEEEEE		39.53,40.91,38.61,32.11,37.55,33.21	38.08	LSQHPPSLCISDSEEEEEERKKKCPKKASFASASAEVGKKGKKKCQKQGPPCSDSEEEVERKKKCHKQALVGSDSAEDEKRKRKCQKHAPINSAQHLDNVDQTGPKAWKGSTTNDPPKQSPGSTSPKPPHTLSRKQWRNRQKNKRRCKNKFQPPQVPDQAPAEAPTEKTEVSPVPRTDSHEA	HTTS HHHHHHHHHHHHHHHHTTS TTHHHHH	74.0,61.16,56.13,45.01,40.19,40.99,43.4,34.88,31.57,33.99,36.2,39.02,44.28,39.53,40.91,38.61,32.11,37.55,33.21,38.83,36.12,42.67,39.8,36.84,38.89,36.9,40.04,37.24,38.54,41.46,34.82,39.53,38.28,38.71,40.9,37.85,38.8,38.93,38.04,39.0,39.06,41.43,44.09,43.47,41.77,45.49,43.84,42.57,38.33,40.46,45.2,37.58,39.36,37.23,39.71,36.04,39.35,33.42,40.68,34.34,39.3,36.99,35.42,35.11,31.85,36.19,32.8,38.39,31…	40.905	GPVISRPPPAASSQNKGSKRRQLLATLRALEAASLSQHPPSLCISDSEEE	EEERKKKCPKKASFASASAEVGKKGKKKCQKQGPPCSDSEEEVERKKKCH	THHHHHHHHHHHHHHHHHHHHHHHHHTTS
O43166	O43166_p_1_1	8	1461	1468	S	O43166_8	97	1379	1475	0.724	0.724	SSSSSSSS		27.74,29.86,30.2,30.24,32.03,30.85,31.84,35.09	30.545	TESHGLDRKTESSLSLDIHSKSQAGSTPLTRENSTFSINDAASHTSTMSSRHSASPVVFTSARSSPKEELHPAAPSQLAPSFSSSSSSSSGPRSFYP		27.7,25.69,26.8,28.68,32.07,31.26,29.58,36.86,29.21,32.95,33.56,29.45,28.3,29.24,28.85,32.87,31.49,36.32,33.76,31.65,34.54,32.2,32.59,31.16,33.68,35.14,31.94,36.98,33.68,37.46,34.81,38.46,31.92,34.96,31.98,35.36,32.47,35.28,35.07,27.06,33.74,35.55,27.01,27.2,26.56,32.18,27.85,26.02,24.72,31.01,28.67,25.86,28.69,24.79,26.28,28.81,26.2,26.73,25.93,28.02,26.03,32.67,35.32,32.33,33.37,38.23,35.23,32.…	32.03	SINDAASHTSTMSSRHSASPVVFTSARSSPKEELHPAAPSQLAPSFSSSS	SSSSGPRSFYPRQGATSKYLIGWKKPEGTINSVGFMDTRKRHQSDGNEIA		S
O43295	O43295_p_1_1	7	1068	1074	S	O43295_6	105	995	1099	0.779	0.779	SSSSSSS		38.25,37.46,37.63,36.27,36.44,36.63,36.64	36.64	LEPLKNPPGPVSSEPASPLHTIVIRDPDAAMRRSSSSSTEMMTTFKPALSARLAGAQLRPPPMRPVRPVVQHRSSSSSSSGVGSPAVTPTEKMFPNSSADKSGTM		36.85,32.57,32.54,36.04,34.27,33.93,37.75,42.1,34.22,34.72,33.07,31.76,33.85,32.08,32.83,35.51,31.05,39.88,31.79,34.86,31.72,36.72,32.95,32.62,34.86,31.85,42.69,31.6,34.95,32.96,30.2,35.46,34.31,33.18,31.62,35.19,33.77,36.4,34.56,36.72,36.73,32.47,35.83,33.52,34.79,35.45,36.63,38.03,32.76,36.96,32.67,37.6,34.19,38.92,33.21,38.69,38.49,32.77,34.56,36.56,47.4,45.45,35.33,36.75,39.91,36.41,35.45,36.…	36.04	PDAAMRRSSSSSTEMMTTFKPALSARLAGAQLRPPPMRPVRPVVQHRSSS	SSSSGVGSPAVTPTEKMFPNSSADKSGTM|||||||||||||||||||||		|||||||||||||||||||||
O43423	O43423_p_1_1	6	188	193	E	O43423_1	74	161	234	0.342	0.342	EEEEEE		52.46,56.53,53.1,49.75,57.0,48.03	52.78	EGLDDEEEGEHEEEYDEDAQVVEDEEGEEEEEEGEEEDVSGGDEEDEEGYNDGEVDGEEDEEELGEEERGQKRK		48.97,56.27,52.47,55.71,57.07,56.91,58.85,50.54,55.76,49.27,51.88,49.73,51.45,48.75,57.29,48.57,55.88,51.14,57.0,55.47,59.11,59.38,54.17,61.55,58.79,54.98,54.42,52.46,56.53,53.1,49.75,57.0,48.03,60.37,51.31,63.6,50.23,56.75,57.84,51.61,48.97,48.59,53.66,54.73,51.1,54.35,54.6,54.08,55.8,56.55,57.66,52.4,60.59,53.02,61.3,53.93,55.79,56.12,49.28,58.7,49.52,53.38,53.3,47.57,50.23,50.26,51.59,55.85,46…	54.385	LDSCYWDHKEAPYSDIEDHVEGLDDEEEGEHEEEYDEDAQVVEDEEGEEE	EEEGEEEDVSGGDEEDEEGYNDGEVDGEEDEEELGEEERGQKRK||||||	ETTEE S S	||||||
O43435	O43435_p_1_1	6	43	48	P	O43435_1	50	23	72	0.737	0.737	PPPPPP		69.08,71.0,70.02,70.1,64.82,67.29	69.55	AAGGFPGAASPGADPYGPREPPPPPPRYDPCAAAAPGAPGPPPPPHAYPF	TTS S	39.81,37.69,32.88,33.78,32.23,33.5,37.34,36.86,37.75,41.34,41.62,39.67,45.54,45.26,43.55,48.58,47.14,50.41,43.26,57.34,69.08,71.0,70.02,70.1,64.82,67.29,51.98,40.09,48.88,42.68,40.96,42.78,40.33,43.3,46.26,46.52,43.51,53.69,47.93,37.85,68.36,60.8,58.21,65.62,52.01,48.85,42.3,53.45,52.37,38.49	45.4	|||||MHFSTVTRDMEAFTASSLSSLGAAGGFPGAASPGADPYGPREPPP	PPPRYDPCAAAAPGAPGPPPPPHAYPFAPAAGAATSAAAEPEGPGASCAA	||||| HHHHHHHHHHHHHHHHHHHHHTTS S
O43462	O43462_p_1_1	23	114	136	S	O43462_1	22	114	135	0.702	0.702	SSSSSSSSSSSSSSSSSSSSSSS		31.81,28.98,31.76,28.84,32.68,26.54,28.79,26.66,26.19,27.13,24.92,29.11,25.44,26.91,24.82,25.59,23.59,25.34,24.18,23.9,24.35,23.9,27.01	26.54	SSSSSSSSSSSSSSSSSSSSSS		31.81,28.98,31.76,28.84,32.68,26.54,28.79,26.66,26.19,27.13,24.92,29.11,25.44,26.91,24.82,25.59,23.59,25.34,24.18,23.9,24.35,23.9	26.365	WFNFGMVFGVIAMFSSFFLLGKTLMQTLAQMMADSPSSYSSSSSSSSSSS	SSSSSSSSSSSSLHNEQVLQVVVPGINLPVNQLTYFFTAVLISGVVHEIG	HHHHHHHHHHHHHHHHHHHHHHHHHHHHHHHHHSS	TT BTTTB GGGHHHHHHHHHHHHHHHHHH
O43491	O43491_p_1_1	6	741	746	S	O43491_3	149	652	800	0.58	0.58	SSSSSS		32.29,32.07,31.1,35.46,34.74,38.16	33.515	KRNFMESTPEPRPNEWEKRRITPLSLQTQGSSHETLNIVEEKKRAEVGKDERVITEEMNGKEISPGSGPGEIRKVEPVTQKDSTSLSSESSSSSSESEEEDVGEYRPHHRVTEGTIREEQEYEEEVEEEPRPAAKVVEREEAVPEASPV	HHHHHH HHHHTT	73.75,77.48,75.98,65.07,68.58,65.0,52.08,43.41,46.12,44.03,41.09,43.16,43.71,48.68,51.8,44.89,55.65,56.84,56.53,50.45,47.84,41.81,35.3,31.35,34.46,37.89,30.76,28.19,27.88,29.91,26.75,27.29,28.42,32.23,28.68,31.69,31.4,33.88,37.44,36.85,37.19,40.1,40.81,36.38,37.03,38.03,37.27,38.39,38.22,36.9,40.04,33.66,34.19,33.36,32.34,35.5,38.92,38.1,33.0,40.43,39.55,37.5,36.85,37.54,46.22,31.83,31.08,37.19,4…	36.58	KRAEVGKDERVITEEMNGKEISPGSGPGEIRKVEPVTQKDSTSLSSESSS	SSSESEEEDVGEYRPHHRVTEGTIREEQEYEEEVEEEPRPAAKVVEREEA
O43516	O43516_p_1_1	6	68	73	G	O43516_1	503	1	503	0.65	0.65	GGGGGG		40.32,40.47,39.45,38.1,38.92,40.44	39.885	MPVPPPPAPPPPPTFALANTEKPTLNKTEQAGRNALLSDISKGKKLKKTVTNDRSAPILDKPKGAGAGGGGGGFGGGGGFGGGGGGGGGGSFGGGGPPGLGGLFQAGMPKLRSTANRDNDSGGSRPPLLPPGGRSTSAKPFSPPSGPGRFPVPSPGHRSGPPEPQRNRMPPPRPDVGSKPDSIPPPVPSTPRPIQSSPHNRGSPPVPGGPRQPSPGPTPPPFPGNRGTALGGGSIRQSPLSSSSPFSNRPPLPPTPSRALDDKPPPPPPPVGNRPSIHREAVPPPPPQNNKPPVPSTPRPSASSQAPPPPPPPSRPGPPPLPPSSSGNDETPRLPQRNLSLSSSTPPLPSPGRSGPLPPPPSERPPPPVRDPPGRSGPLPPPPPVSRNGSTSRALPATP…	TTTTS S HHHHHHHHHHHHHHHH S TTSSSTTTT S TT S S S S S S SS S S TTGGGS GGGS GGGS TT TTS SSS S	69.63,71.66,80.42,85.61,85.47,88.07,87.95,86.63,87.61,85.72,84.67,82.21,76.28,72.33,65.4,64.25,61.66,58.81,61.78,62.44,64.87,70.2,72.71,77.15,78.23,86.1,87.15,86.15,88.84,89.41,89.17,90.72,91.54,92.94,92.8,95.21,92.35,94.92,93.74,92.46,92.37,95.19,90.88,92.44,89.42,86.49,91.79,91.79,86.82,89.61,87.69,86.59,85.16,84.11,87.94,80.02,78.52,80.57,80.99,75.98,72.86,63.4,60.96,41.45,45.84,41.44,48.19,40…	52.71	EKPTLNKTEQAGRNALLSDISKGKKLKKTVTNDRSAPILDKPKGAGAGGG	GGGFGGGGGFGGGGGGGGGGSFGGGGPPGLGGLFQAGMPKLRSTANRDND	S HHHHHHHHHHHHHHHH S	TTSSSTTTT S
O43516	O43516_p_2_1	10	81	90	G	O43516_1	503	1	503	0.65	0.65	GGGGGGGGGG		46.99,41.31,39.63,38.34,40.13,39.1,38.32,41.58,41.58,45.51	40.72	MPVPPPPAPPPPPTFALANTEKPTLNKTEQAGRNALLSDISKGKKLKKTVTNDRSAPILDKPKGAGAGGGGGGFGGGGGFGGGGGGGGGGSFGGGGPPGLGGLFQAGMPKLRSTANRDNDSGGSRPPLLPPGGRSTSAKPFSPPSGPGRFPVPSPGHRSGPPEPQRNRMPPPRPDVGSKPDSIPPPVPSTPRPIQSSPHNRGSPPVPGGPRQPSPGPTPPPFPGNRGTALGGGSIRQSPLSSSSPFSNRPPLPPTPSRALDDKPPPPPPPVGNRPSIHREAVPPPPPQNNKPPVPSTPRPSASSQAPPPPPPPSRPGPPPLPPSSSGNDETPRLPQRNLSLSSSTPPLPSPGRSGPLPPPPSERPPPPVRDPPGRSGPLPPPPPVSRNGSTSRALPATP…	TTTTS S HHHHHHHHHHHHHHHH S TTSSSTTTT S TT S S S S S S SS S S TTGGGS GGGS GGGS TT TTS SSS S	69.63,71.66,80.42,85.61,85.47,88.07,87.95,86.63,87.61,85.72,84.67,82.21,76.28,72.33,65.4,64.25,61.66,58.81,61.78,62.44,64.87,70.2,72.71,77.15,78.23,86.1,87.15,86.15,88.84,89.41,89.17,90.72,91.54,92.94,92.8,95.21,92.35,94.92,93.74,92.46,92.37,95.19,90.88,92.44,89.42,86.49,91.79,91.79,86.82,89.61,87.69,86.59,85.16,84.11,87.94,80.02,78.52,80.57,80.99,75.98,72.86,63.4,60.96,41.45,45.84,41.44,48.19,40…	52.71	LLSDISKGKKLKKTVTNDRSAPILDKPKGAGAGGGGGGFGGGGGFGGGGG	GGGGGSFGGGGPPGLGGLFQAGMPKLRSTANRDNDSGGSRPPLLPPGGRS	HHHHHHH S	TTSSSTTTT S TT
O43516	O43516_p_3_1	7	264	270	P	O43516_1	503	1	503	0.65	0.65	PPPPPPP		63.28,70.51,67.39,60.26,62.49,66.44,63.84	63.84	MPVPPPPAPPPPPTFALANTEKPTLNKTEQAGRNALLSDISKGKKLKKTVTNDRSAPILDKPKGAGAGGGGGGFGGGGGFGGGGGGGGGGSFGGGGPPGLGGLFQAGMPKLRSTANRDNDSGGSRPPLLPPGGRSTSAKPFSPPSGPGRFPVPSPGHRSGPPEPQRNRMPPPRPDVGSKPDSIPPPVPSTPRPIQSSPHNRGSPPVPGGPRQPSPGPTPPPFPGNRGTALGGGSIRQSPLSSSSPFSNRPPLPPTPSRALDDKPPPPPPPVGNRPSIHREAVPPPPPQNNKPPVPSTPRPSASSQAPPPPPPPSRPGPPPLPPSSSGNDETPRLPQRNLSLSSSTPPLPSPGRSGPLPPPPSERPPPPVRDPPGRSGPLPPPPPVSRNGSTSRALPATP…	TTTTS S HHHHHHHHHHHHHHHH S TTSSSTTTT S TT S S S S S S SS S S TTGGGS GGGS GGGS TT TTS SSS S	69.63,71.66,80.42,85.61,85.47,88.07,87.95,86.63,87.61,85.72,84.67,82.21,76.28,72.33,65.4,64.25,61.66,58.81,61.78,62.44,64.87,70.2,72.71,77.15,78.23,86.1,87.15,86.15,88.84,89.41,89.17,90.72,91.54,92.94,92.8,95.21,92.35,94.92,93.74,92.46,92.37,95.19,90.88,92.44,89.42,86.49,91.79,91.79,86.82,89.61,87.69,86.59,85.16,84.11,87.94,80.02,78.52,80.57,80.99,75.98,72.86,63.4,60.96,41.45,45.84,41.44,48.19,40…	52.71	PTPPPFPGNRGTALGGGSIRQSPLSSSSPFSNRPPLPPTPSRALDDKPPP	PPPPVGNRPSIHREAVPPPPPQNNKPPVPSTPRPSASSQAPPPPPPPSRP	S S	S S
O43516	O43516_p_4_1	7	307	313	P	O43516_1	503	1	503	0.65	0.65	PPPPPPP		58.88,67.32,62.78,67.69,65.85,66.89,74.42	66.89	MPVPPPPAPPPPPTFALANTEKPTLNKTEQAGRNALLSDISKGKKLKKTVTNDRSAPILDKPKGAGAGGGGGGFGGGGGFGGGGGGGGGGSFGGGGPPGLGGLFQAGMPKLRSTANRDNDSGGSRPPLLPPGGRSTSAKPFSPPSGPGRFPVPSPGHRSGPPEPQRNRMPPPRPDVGSKPDSIPPPVPSTPRPIQSSPHNRGSPPVPGGPRQPSPGPTPPPFPGNRGTALGGGSIRQSPLSSSSPFSNRPPLPPTPSRALDDKPPPPPPPVGNRPSIHREAVPPPPPQNNKPPVPSTPRPSASSQAPPPPPPPSRPGPPPLPPSSSGNDETPRLPQRNLSLSSSTPPLPSPGRSGPLPPPPSERPPPPVRDPPGRSGPLPPPPPVSRNGSTSRALPATP…	TTTTS S HHHHHHHHHHHHHHHH S TTSSSTTTT S TT S S S S S S SS S S TTGGGS GGGS GGGS TT TTS SSS S	69.63,71.66,80.42,85.61,85.47,88.07,87.95,86.63,87.61,85.72,84.67,82.21,76.28,72.33,65.4,64.25,61.66,58.81,61.78,62.44,64.87,70.2,72.71,77.15,78.23,86.1,87.15,86.15,88.84,89.41,89.17,90.72,91.54,92.94,92.8,95.21,92.35,94.92,93.74,92.46,92.37,95.19,90.88,92.44,89.42,86.49,91.79,91.79,86.82,89.61,87.69,86.59,85.16,84.11,87.94,80.02,78.52,80.57,80.99,75.98,72.86,63.4,60.96,41.45,45.84,41.44,48.19,40…	52.71	LDDKPPPPPPPVGNRPSIHREAVPPPPPQNNKPPVPSTPRPSASSQAPPP	PPPPSRPGPPPLPPSSSGNDETPRLPQRNLSLSSSTPPLPSPGRSGPLPP	S S	S S
O43516	O43516_p_5_1	6	428	433	P	O43516_1	503	1	503	0.65	0.65	PPPPPP		64.84,66.27,57.95,67.22,66.6,57.94	65.555	MPVPPPPAPPPPPTFALANTEKPTLNKTEQAGRNALLSDISKGKKLKKTVTNDRSAPILDKPKGAGAGGGGGGFGGGGGFGGGGGGGGGGSFGGGGPPGLGGLFQAGMPKLRSTANRDNDSGGSRPPLLPPGGRSTSAKPFSPPSGPGRFPVPSPGHRSGPPEPQRNRMPPPRPDVGSKPDSIPPPVPSTPRPIQSSPHNRGSPPVPGGPRQPSPGPTPPPFPGNRGTALGGGSIRQSPLSSSSPFSNRPPLPPTPSRALDDKPPPPPPPVGNRPSIHREAVPPPPPQNNKPPVPSTPRPSASSQAPPPPPPPSRPGPPPLPPSSSGNDETPRLPQRNLSLSSSTPPLPSPGRSGPLPPPPSERPPPPVRDPPGRSGPLPPPPPVSRNGSTSRALPATP…	TTTTS S HHHHHHHHHHHHHHHH S TTSSSTTTT S TT S S S S S S SS S S TTGGGS GGGS GGGS TT TTS SSS S	69.63,71.66,80.42,85.61,85.47,88.07,87.95,86.63,87.61,85.72,84.67,82.21,76.28,72.33,65.4,64.25,61.66,58.81,61.78,62.44,64.87,70.2,72.71,77.15,78.23,86.1,87.15,86.15,88.84,89.41,89.17,90.72,91.54,92.94,92.8,95.21,92.35,94.92,93.74,92.46,92.37,95.19,90.88,92.44,89.42,86.49,91.79,91.79,86.82,89.61,87.69,86.59,85.16,84.11,87.94,80.02,78.52,80.57,80.99,75.98,72.86,63.4,60.96,41.45,45.84,41.44,48.19,40…	52.71	PPPPVSRNGSTSRALPATPQLPSRSGVDSPRSGPRPPLPPDRPSAGAPPP	PPPSTSIRNGFQDSPCEDEWESRFYFHPISDLPPPEPYVQTTKSYPSKLA		S TTGGGS GGGS GGGS
O43525	O43525_p_1_1	7	18	24	G	O43525_1	43	1	43	0.79	0.79	GGGGGGG		39.83,36.09,36.05,37.21,34.93,33.66,35.01	36.05	MGLKARRAAGAAGGGGDGGGGGGGAANPAGGDAAAAGDEERKV		38.77,43.5,39.55,40.43,40.16,44.52,38.46,40.87,40.16,39.11,39.49,39.82,36.26,38.82,36.81,40.24,36.94,39.83,36.09,36.05,37.21,34.93,33.66,35.01,33.06,38.92,35.23,45.61,39.43,34.44,37.31,34.66,36.87,32.88,36.15,33.27,36.5,35.46,36.47,32.15,33.67,31.42,35.01	36.87	||||||||||||||||||||||||||||||MGLKARRAAGAAGGGGDGGG	GGGGAANPAGGDAAAAGDEERKVGLAPGDVEQVTLALGAGADKDGTLLLE	||||||||||||||||||||||||||||||	S
O43541	O43541_p_1_1	6	28	33	G	O43541_1	116	1	116	0.667	0.667	GGGGGG		35.24,32.23,35.04,35.33,34.79,38.38	35.14	MFRSKRSGLVRRLWRSRVVPDREEGGSGGGGGGDEDGSLGSRAEPAPRAREGGGCGRSEVRPVAPRRPRDAVGQRGAQGAGRRRRAGGPPRPMSEPGAGAGSSLLDVAEPGGPGWL	HHHHHHHHHHHT SS	53.33,60.15,74.63,87.29,91.81,93.47,92.36,94.35,95.92,95.57,93.57,94.92,95.27,94.04,93.5,92.92,93.37,89.87,76.4,71.22,66.36,64.89,48.47,41.1,38.63,33.93,35.34,35.24,32.23,35.04,35.33,34.79,38.38,40.25,44.88,43.08,39.84,41.12,41.22,37.28,39.8,41.02,40.21,37.06,42.79,40.19,46.99,42.2,37.75,40.97,39.3,37.63,36.39,34.2,40.38,37.84,40.09,42.1,36.74,40.49,41.35,40.3,41.56,40.67,48.27,39.42,38.91,49.46,…	40.435	||||||||||||||||||||MFRSKRSGLVRRLWRSRVVPDREEGGSGGG	GGGDEDGSLGSRAEPAPRAREGGGCGRSEVRPVAPRRPRDAVGQRGAQGA	|||||||||||||||||||| HHHHHHHHHHHT SS
O43719	O43719_p_1_1	6	749	754	D	O43719_4	323	433	755	0.461	0.461	DDDDDD		52.85,60.71,56.29,61.56,61.8,61.76	61.135	KTEDGGEFEEGASENNAKESSPEKEAEEGCPEKESEEGCPKRGFEGSCSQKESEEGNPVRGSEEDSPKKESKKKTLKNDCEENGLAKESEDDLNKESEEEVGPTKESEEDDSEKESDEDCSEKQSEDGSEREFEENGLEKDLDEEGSEKELHENVLDKELEENDSENSEFEDDGSEKVLDEEGSEREFDEDSDEKEEEEDTYEKVFDDESDEKEDEEYADEKGLEAADKKAEEGDADEKLFEESDDKEDEDADGKEVEDADEKLFEDDDSNEKLFDEEEDSSEKLFDDSDERGTLGGFGSVEEGPLSTGSSFILSSDDDDDDI		37.44,45.56,38.18,47.01,37.75,43.36,40.69,40.71,41.72,39.19,41.03,36.64,42.35,40.91,41.48,39.0,39.16,42.65,42.06,39.46,36.8,47.55,40.89,42.91,41.79,40.45,42.07,44.82,38.21,33.22,40.6,38.97,38.64,36.2,41.72,41.74,41.79,38.96,34.12,40.63,41.69,32.91,40.14,33.34,37.54,36.2,30.93,31.53,32.55,33.58,35.4,36.55,38.42,39.7,40.74,37.8,42.91,44.61,41.8,38.25,33.53,41.82,37.66,40.53,39.63,37.93,42.26,40.19,…	41.8	SNEKLFDEEEDSSEKLFDDSDERGTLGGFGSVEEGPLSTGSSFILSSDDD	DDDI||||||||||||||||||||||||||||||||||||||||||||||		||||||||||||||||||||||||||||||||||||||||||||||
O43818	O43818_p_1_1	7	64	70	E	O43818_1	75	1	75	0.571	0.571	EEEEEEE		33.41,33.08,36.07,33.07,39.43,41.98,47.25	36.07	MSATAAARKRGKPASGAGAGAGAGKRRRKADSAGDRGKSKGGGKMNEEISSDSESESLAPRKPEEEEEEELEETA	H	37.4,37.01,31.18,31.38,28.33,34.27,26.34,31.85,28.53,29.27,33.06,27.2,36.34,30.59,31.3,28.07,29.89,27.11,30.0,26.9,27.76,27.46,27.8,27.8,26.95,29.68,24.83,29.65,23.63,27.98,24.87,28.89,25.89,25.8,23.57,25.55,29.0,27.09,29.55,31.23,31.38,28.78,38.53,33.61,40.04,34.01,44.42,35.47,40.06,30.5,49.29,30.66,40.54,30.63,39.57,33.21,31.04,31.86,30.71,50.81,36.95,30.91,38.1,33.41,33.08,36.07,33.07,39.43,41…	31.18	AGAGAGAGKRRRKADSAGDRGKSKGGGKMNEEISSDSESESLAPRKPEEE	EEEELEETAQEKKLRLAKLYLEQLRQQEEEKAEARAFEEDQVAGRLKEDV		HHHHHHHHHHHHHHHHHHHHHHHHHHHHHHHHHHHHHHHHHH
O60231	O60231_p_1_1	7	133	139	E	O60231_1	107	101	207	0.347	0.347	EEEEEEE		22.79,25.24,24.29,26.02,24.73,26.04,25.88	25.24	EDSEESSEETVSRAGSSLQKKRKKRKHLRKKREEEEEEEASEKGKKKTGGSKQQTEKPESEDEWERTERERLQDLEERDAFAERVRQRDKDRTRNVLERSDKKAYEE	TT HHHHHHHHHHHHHHHHHHHHHHHHHHHHHHS TTTT HHHHHHH	38.13,38.02,37.54,32.87,30.39,29.86,27.65,31.01,25.08,27.38,25.93,24.71,29.66,24.38,26.4,25.72,28.93,25.68,28.26,25.27,27.03,27.23,27.5,26.4,26.42,26.71,26.09,28.13,27.19,24.17,25.82,26.11,22.79,25.24,24.29,26.02,24.73,26.04,25.88,24.16,24.45,24.38,27.03,25.26,26.44,26.24,24.65,26.53,27.53,26.79,28.18,31.18,29.17,30.09,33.7,31.86,34.5,38.15,40.71,49.45,50.82,71.97,74.19,71.31,76.31,75.37,78.94,78…	33.7	EARALLEKNRSYRLLEDSEESSEETVSRAGSSLQKKRKKRKHLRKKREEE	EEEEASEKGKKKTGGSKQQTEKPESEDEWERTERERLQDLEERDAFAERV	HHHHHHHHHHH	TT HHHHHHHHHHHHHHHHHHHHHHH
O60237	O60237_p_1_1	6	357	362	S	O60237_2	176	342	517	0.555	0.555	SSSSSS		41.74,41.22,40.64,35.76,38.71,40.42	40.53	EETPKSQEMEEENKESSSSSSEEEEGEDEASESETEKEADKKPEAFVNHSNSESKSSITEQIPAPAQNTFSASSARRFSSGLFNKPEEPKDESPSSWRLGLRKTGSHNMLSEVANSREPIRDRGSSIYRSSSSPRISALLDNKDKERENKSYISSLAPRKLNSTSDIEEKENRESA	GGGGG	30.16,35.02,29.6,40.24,30.72,36.57,35.94,35.69,35.57,38.17,38.97,38.0,37.68,41.82,41.15,41.74,41.22,40.64,35.76,38.71,40.42,41.83,44.08,42.57,39.48,39.57,42.63,41.07,39.02,38.96,41.26,38.5,35.74,37.01,37.67,41.63,44.0,40.29,42.93,45.02,45.01,37.9,42.03,40.27,35.74,37.6,38.38,34.98,35.75,37.12,35.16,35.04,36.77,35.69,34.89,38.39,31.69,38.65,32.67,37.15,34.2,36.12,32.5,31.54,36.69,33.68,30.59,31.22…	37.035	SEKETRNKLIESDLNSKIQSGFFKNKEKMLYEEETPKSQEMEEENKESSS	SSSEEEEGEDEASESETEKEADKKPEAFVNHSNSESKSSITEQIPAPAQN	HHHHHHHHHHHHHHHHHHHHH S
O60239	O60239_p_1_1	7	23	29	E	O60239_1	63	1	63	0.515	0.515	EEEEEEE		46.93,45.61,44.05,43.79,42.9,46.89,43.31	44.05	MDAALKRSRSEEPAEILPPARDEEEEEEEGMEQGLEEEEEVDPRIQGELEKLNQSTDDINRRE	S HHHHHHHHHHHHHHHHHHHHH	46.94,45.57,49.05,46.09,59.62,51.65,56.76,45.8,55.81,45.15,54.88,54.14,45.62,51.47,43.75,56.98,50.83,50.14,56.1,42.95,49.4,43.22,46.93,45.61,44.05,43.79,42.9,46.89,43.31,41.68,39.49,39.36,36.97,34.0,38.11,39.09,44.32,48.21,65.41,70.96,78.8,83.62,89.3,92.01,94.38,94.99,95.13,96.46,96.95,97.01,97.16,97.69,97.18,97.85,97.64,98.19,98.12,98.04,98.35,98.07,98.28,97.7,98.31	54.14	|||||||||||||||||||||||||MDAALKRSRSEEPAEILPPARDEEE	EEEEGMEQGLEEEEEVDPRIQGELEKLNQSTDDINRRETELEDARQKFRS	|||||||||||||||||||||||||	S HHHHHHHHHHHHHHHHHHHHHHHHHHHHHHHHH
O60241	O60241_p_1_1	7	1364	1370	G	O60241_3	27	1359	1385	0.626	0.626	GGGGGGG		32.81,34.13,33.74,30.67,29.07,30.68,31.73	31.73	LSLQPGGGGGGGEDAPRARPEGTPRRA		28.61,30.74,30.17,29.56,32.22,32.81,34.13,33.74,30.67,29.07,30.68,31.73,34.78,32.79,35.62,41.93,35.36,35.2,29.99,39.01,30.93,34.72,29.66,39.97,33.04,35.66,35.68	32.81	PPQEANPVYMCGEGGLRQLDLTWLRPTEPGSEGDYMVLPRRTLSLQPGGG	GGGGEDAPRARPEGTPRRAAKTVAHTEGYPSFLSVDHSGLGLGPAYGSLQ
O60244	O60244_p_1_1	6	15	20	G	O60244_1	34	1	34	0.788	0.788	GGGGGG		30.95,31.5,32.08,33.9,34.83,33.78	32.93	MAPVQLENHQLVPPGGGGGGSGGPPSAPAPPPPG	TT	27.73,27.65,31.14,25.16,24.15,25.69,23.84,26.73,28.52,25.74,28.86,28.8,37.59,31.51,30.95,31.5,32.08,33.9,34.83,33.78,37.55,33.01,34.58,37.87,35.67,39.32,33.68,39.96,41.7,36.0,44.07,46.27,35.66,39.39	33.345	|||||||||||||||||||||||||||||||||MAPVQLENHQLVPPGGG	GGGSGGPPSAPAPPPPGAAVAAAAAAAASPGYRLSTLIEFLLHRAYSELM	|||||||||||||||||||||||||||||||||	TTTHHHHHHHH HHHHHHHHHHHHHHHHH
O60264	O60264_p_1_1	7	7	13	P	O60264_1	83	1	83	0.705	0.705	PPPPPPP		53.75,54.15,68.37,58.99,55.38,60.11,45.7	55.38	MSSAAEPPPPPPPESAPSKPAASIASGGSNSSNKGGPEGVAAQAVASAASAGPADAEMEEIFDDASPGKQKEIQEPDPTYEEK	S S HHHHHH	37.83,38.25,39.4,43.64,42.68,46.06,53.75,54.15,68.37,58.99,55.38,60.11,45.7,35.95,40.46,38.46,39.03,36.86,35.83,37.21,32.79,32.59,31.0,28.59,29.38,27.84,29.06,27.71,29.43,30.11,32.01,30.84,34.18,31.96,34.02,34.18,50.18,38.08,36.92,38.68,37.28,38.52,34.21,35.91,34.2,33.52,33.98,31.06,30.57,30.59,30.97,31.61,35.47,32.62,31.62,30.62,30.28,30.63,30.5,31.44,32.25,36.56,32.54,33.51,37.4,37.0,34.82,31.5…	35.05	|||||||||||||||||||||||||||||||||||||||||MSSAAEPPP	PPPPESAPSKPAASIASGGSNSSNKGGPEGVAAQAVASAASAGPADAEME	|||||||||||||||||||||||||||||||||||||||||	S
O60293	O60293_p_1_1	6	40	45	S	O60293_1	133	1	133	0.607	0.607	SSSSSS		35.48,31.45,30.72,32.2,31.14,31.04	31.295	MATADTPAPASSGLSPKEEGELEDGEISDDDNNSQIRSRSSSSSSGGGLLPYPRRRPPHSARGGGSGGGGGSSSSSSSSQQQLRNFSRSRHASERGHLRGPSSYRPKEPFRSHPPSVRMPSSSLSESSPRPSF	S H	37.41,37.23,37.87,40.42,38.77,39.18,43.26,38.65,48.0,34.18,34.99,32.75,34.55,34.36,37.4,41.92,34.6,39.65,41.51,39.7,41.43,44.02,42.83,45.76,42.57,42.42,41.29,38.13,40.86,40.72,37.5,38.88,31.77,39.45,29.64,33.01,32.56,36.94,30.65,35.48,31.45,30.72,32.2,31.14,31.04,29.33,28.3,28.87,29.92,33.69,37.72,33.84,44.61,35.78,35.6,40.26,39.1,42.85,36.64,36.22,36.38,36.35,35.32,34.6,36.04,39.73,37.37,36.34,3…	33.84	||||||||MATADTPAPASSGLSPKEEGELEDGEISDDDNNSQIRSRSSS	SSSGGGLLPYPRRRPPHSARGGGSGGGGGSSSSSSSSQQQLRNFSRSRHA	||||||||
O60293	O60293_p_2_1	8	72	79	S	O60293_1	133	1	133	0.607	0.607	SSSSSSSS		30.54,30.16,28.8,28.45,27.89,30.61,26.98,29.57	29.185	MATADTPAPASSGLSPKEEGELEDGEISDDDNNSQIRSRSSSSSSGGGLLPYPRRRPPHSARGGGSGGGGGSSSSSSSSQQQLRNFSRSRHASERGHLRGPSSYRPKEPFRSHPPSVRMPSSSLSESSPRPSF	S H	37.41,37.23,37.87,40.42,38.77,39.18,43.26,38.65,48.0,34.18,34.99,32.75,34.55,34.36,37.4,41.92,34.6,39.65,41.51,39.7,41.43,44.02,42.83,45.76,42.57,42.42,41.29,38.13,40.86,40.72,37.5,38.88,31.77,39.45,29.64,33.01,32.56,36.94,30.65,35.48,31.45,30.72,32.2,31.14,31.04,29.33,28.3,28.87,29.92,33.69,37.72,33.84,44.61,35.78,35.6,40.26,39.1,42.85,36.64,36.22,36.38,36.35,35.32,34.6,36.04,39.73,37.37,36.34,3…	33.84	EISDDDNNSQIRSRSSSSSSGGGLLPYPRRRPPHSARGGGSGGGGGSSSS	SSSSQQQLRNFSRSRHASERGHLRGPSSYRPKEPFRSHPPSVRMPSSSLS		S
O60293	O60293_p_3_1	6	620	625	E	O60293_5	287	385	671	0.583	0.583	EEEEEE	HHHHHH	64.65,72.55,71.17,75.02,77.64,75.84	73.785	KWQQKEQQVMKESKEKLTKTKTVQQKVKTSTKTHSAKKVSTTAKQALRKQQTKAWKKLQQQKEQERQKEEDQRKQAEEEERRKREEEIRKIRDLSNQEEQYNRFMKLVGGKRRSRSKSSDPDLRRSLDKQPTDSGGGIYQYDNYEEVAMDTDSETSSPAPSPVQPPFFSECSLGYFSPAPSLSLPPPPQVSSLPPLSQPYVEGLCVSLEPLPPLPPLPPLPPEDPEQPPKPPFADEEEEEEMLLREELLKSLANKRAFKPEETSSNSDPPSPPVLNNSHPVPRSNLS	HHHHHHHHHHHHHHHHTS S SHHHHHHHHHHHHHHHHHHHHHHHHHHHHHHHHHHHHHHHHHHHHHHHHHHHT S HHHHHHHHHHHHSS S SS S HHHHHHHHHHHHHHHHHHHTT	81.82,76.99,78.74,78.97,77.52,77.23,76.24,78.07,69.12,67.99,73.85,68.5,58.09,54.93,55.34,52.32,48.36,41.87,33.98,34.86,31.48,32.43,32.38,36.91,34.72,31.19,34.35,35.78,34.95,33.38,33.36,33.57,33.25,36.32,34.63,30.87,32.8,34.38,30.83,30.08,37.29,40.46,42.11,49.45,52.47,49.56,54.46,56.21,66.87,64.35,61.02,70.61,71.59,68.41,67.81,74.21,74.66,74.23,74.22,76.19,75.78,74.35,75.6,74.41,73.95,71.39,74.14,…	36.32	QVSSLPPLSQPYVEGLCVSLEPLPPLPPLPPLPPEDPEQPPKPPFADEEE	EEEMLLREELLKSLANKRAFKPEETSSNSDPPSPPVLNNSHPVPRSNLSI	S HHH	HHHHHHHHHHHHHHHHTT
O60307	O60307_p_1_1	6	104	109	S	O60307_2	26	88	113	0.702	0.702	SSSSSS		32.98,30.43,31.94,33.42,31.0,36.18	32.46	SLPSSGYGTNTPSSTLSSSSSSRERL		38.7,36.58,45.14,38.57,40.47,38.23,38.09,39.07,35.28,36.61,35.66,39.91,38.51,36.93,33.95,36.36,32.98,30.43,31.94,33.42,31.0,36.18,34.86,37.25,35.39,31.53	36.47	SPLDSPRNFSAASALNFPFARRADGRRWSLASLPSSGYGTNTPSSTLSSS	SSSRERLHQLPFQPTPDELHFLSKHFRSSENVLDEEGGRSPRLRPRSRSL		HHHHHHHHHHHSTT S
O60315	O60315_p_1_1	6	1161	1166	E	O60315_5	98	1117	1214	0.372	0.372	EEEEEE		39.33,38.5,40.23,41.16,43.17,42.0	40.695	TPQGYSDSEERESMPRDGESEKEHEKEGEDGYGKLGRQDGDEEFEEEEEESENKSMDTDPETIRDEEETGDHSMDDSSEDGKMETKSDHEEDNMEDGM		36.08,42.31,39.49,37.88,37.25,38.47,33.54,39.76,36.91,40.03,36.53,35.25,31.48,34.73,38.1,33.16,33.5,37.82,38.05,35.21,39.32,40.52,38.04,39.32,40.67,45.21,40.87,43.3,42.26,39.97,42.88,37.15,38.9,44.07,33.26,36.19,33.68,38.59,34.21,38.21,33.21,38.87,37.76,35.83,39.33,38.5,40.23,41.16,43.17,42.0,41.78,42.29,40.1,46.34,44.21,50.35,41.81,40.96,40.88,43.82,36.69,34.74,45.52,38.81,42.86,40.58,45.3,45.44…	40.065	QSITPQGYSDSEERESMPRDGESEKEHEKEGEDGYGKLGRQDGDEEFEEE	EEESENKSMDTDPETIRDEEETGDHSMDDSSEDGKMETKSDHEEDNMEDG	HTS
O60336	O60336_p_1_1	7	1041	1047	E	O60336_3	306	951	1256	0.694	0.694	EEEEEEE		29.47,32.21,28.42,32.01,30.05,33.41,31.88	31.88	EDGIVYPEPSDNPTMDTSEFQVQAPARGTLGRVYPGSRSSEKHSPDSACSVDYSSSCLSSPEHPTEDSESTEPLSVDGISSDLEEPAEGDEEEEEEEGGMGPYGLQEGSPQTPDQEQFLKQHFETLASGAAPGAPVQVPERSESRSISSRFLLQVQTRPLREPSPSSSSLALMSRPAQVPQASGEQPRGNGANPPGAPPEVEPSSGNPSPQQAASVLLPRCRLNPDSSWAPKRVATASPFSGLQKAQSVHSLVPQERHEASLQAPSPGALLSREIEAQDGLGSLPPADGRPSRPHSYQNPTTSSMA	TT B S B HHHHHHHHHHHGGGT HHHHHHHHTT	41.97,49.58,65.94,78.52,80.83,83.19,71.85,64.22,52.87,43.4,32.56,31.09,29.48,30.99,29.61,34.59,31.27,42.32,51.54,56.87,57.54,68.44,73.12,64.82,59.87,43.6,39.41,32.29,27.58,31.25,28.87,30.64,27.42,29.99,32.81,29.47,29.7,26.79,29.22,29.42,30.27,29.4,32.47,29.59,31.9,29.21,32.36,31.99,29.77,31.33,32.75,30.26,32.42,31.2,33.84,34.99,33.81,32.71,32.72,33.4,38.11,34.14,35.63,35.1,33.51,36.66,34.23,35.99…	32.25	SPDSACSVDYSSSCLSSPEHPTEDSESTEPLSVDGISSDLEEPAEGDEEE	EEEEGGMGPYGLQEGSPQTPDQEQFLKQHFETLASGAAPGAPVQVPERSE		HHHHHHHHHHHGGGT
O60341	O60341_p_1_1	12	7	18	A	O60341_1	176	1	176	0.667	0.667	AAAAAAAAAAAA	HHHHHHHTTS	28.64,27.18,29.25,32.29,29.1,28.31,30.33,29.14,30.29,27.74,27.34,28.22	28.87	MLSGKKAAAAAAAAAAAATGTEAGPGTAGGSENGSEVAAQPAGLSGPAEVGPGAVGERTPRKKEPPRASPPGGLAEPPGSAGPQAGPTVVPGSATPMETGIAETPEGRRTSRRKRAKVEYREMDESLANLSEDEYYSEEERNAKAEKEKKLPPPPPQAPPEEENESEPEEPSGVEG	TTTTHHHHHHHHTTS SSSTTTTT S HHHHHTTSTT HHHH	27.43,25.68,26.2,26.77,28.96,31.26,28.64,27.18,29.25,32.29,29.1,28.31,30.33,29.14,30.29,27.74,27.34,28.22,30.7,28.38,28.87,27.92,29.51,27.4,28.76,28.58,31.86,30.06,32.35,28.99,34.28,31.53,36.61,32.94,35.81,33.55,36.34,34.6,32.89,35.39,44.23,37.33,33.33,35.94,39.23,33.52,49.4,36.89,36.49,39.66,38.0,44.51,36.9,36.51,39.7,35.49,34.43,35.09,37.78,36.69,32.86,35.5,35.56,32.2,48.79,34.96,30.7,38.5,31.5…	35.8	||||||||||||||||||||||||||||||||||||||MLSGKKAAAAAA	AAAAAATGTEAGPGTAGGSENGSEVAAQPAGLSGPAEVGPGAVGERTPRK	|||||||||||||||||||||||||||||||||||||| TTTTHHHHHHH	HTTS
O60346	O60346_p_3_1	7	138	144	S	O60346_3	21	136	156	0.913	0.913	SSSSSSS		26.01,25.41,27.23,26.55,27.24,27.7,27.08	27.08	AASSSSSSSAAAASHSPGAAG		25.74,25.22,26.01,25.41,27.23,26.55,27.24,27.7,27.08,27.3,29.37,28.85,31.61,29.46,30.93,30.88,39.61,31.16,31.9,31.59,28.32	28.32	GRRRRRGAPQPIAGGAAPVPGAGGGANSLLLRRGRLKRNLSAAAAAASSS	SSSSAAAASHSPGAAGLPASCSASASLCTRSLDRKTLLLKHRQTLQLQPS	S	SS TTSS HH
O60346	O60346_p_4_1	7	463	469	P	O60346_4	220	252	471	0.73	0.73	PPPPPPP		33.42,36.84,37.81,49.82,59.04,63.72,69.27	49.82	PGAAAAREPAEPPPEAGPRLAPPEPRDSEVPPARSAPGAFGGPPRAPPADLPLPVGGPGGWSRRASPAPSDSSPGEPFVGGPVSSPRAPRPVVSDTESFSLSPSAESVSDRLDPYSSGGGSSSSSEELEADAASAPTGVPGQPRRPGHPAQPLPLPQTASSPQPQQKAPRAIDSPGGAVREGSCEEKAAAAVAPGGLQSTPGRSGVTAEKAPPPPPPPTL	S S E	30.52,27.33,28.92,32.49,33.52,30.9,31.4,33.57,37.68,37.08,34.36,40.1,40.97,38.1,40.61,41.35,37.08,37.33,32.99,33.76,34.71,32.82,39.23,31.97,32.19,32.99,32.17,34.21,30.62,35.02,35.96,37.33,35.21,36.99,37.53,36.67,36.38,35.28,32.26,34.2,31.64,33.69,36.57,34.18,33.51,34.41,42.61,38.24,35.12,35.84,40.72,37.92,35.47,36.9,35.42,34.22,34.19,38.84,33.86,30.54,29.16,29.86,29.0,28.39,32.8,31.88,38.76,32.53…	32.51	QQKAPRAIDSPGGAVREGSCEEKAAAAVAPGGLQSTPGRSGVTAEKAPPP	PPPPTLYVQLHGETTRRLEAEEKPLQIQNDYLFQLGFGELWRVQEEGMDS		EEEEETTS EEE TT HHHHHHHHHHHHT HHHHHHHHT G
O60346	O60346_p_5_1	6	1684	1689	Q	O60346_6	45	1673	1717	0.497	0.497	QQQQQQ	HHHTT	52.51,52.39,46.67,43.63,38.27,34.72	45.15	EVKEIMKHHQEQQQQQQPPPPPQLQPQLPRHYQLDQLPDYYDTPL	HHHHHHHHHHHHHHTT	60.35,52.8,63.15,66.27,61.65,55.46,65.8,60.55,58.7,60.26,59.53,52.51,52.39,46.67,43.63,38.27,34.72,34.64,35.82,37.18,35.38,35.73,31.83,32.92,31.21,34.77,31.73,31.12,35.63,30.52,32.03,28.92,29.84,30.54,30.52,30.12,37.77,39.12,33.42,36.43,32.54,33.08,36.72,40.64,35.91	35.91	IEVATDAPLRKPGGYFAAPAQPDPDDQFIIPPELEEEVKEIMKHHQEQQQ	QQQPPPPPQLQPQLPRHYQLDQLPDYYDTPL|||||||||||||||||||	GGGS HHHHHHHHHHHHHHHHHHH	TT |||||||||||||||||||
O60391	O60391_p_1_1	6	907	912	Q	O60391_1	43	882	924	0.481	0.481	QQQQQQ		32.81,30.5,31.1,33.23,30.95,29.26	31.025	ALNTEPPEGSKEETAEAEPSGPEVEQQQQQQDQPTAPEGWKRA	HH	53.2,48.97,42.74,43.47,39.27,41.38,35.76,31.99,29.14,27.6,30.13,30.3,28.59,32.01,29.19,32.57,31.45,33.88,37.26,30.91,34.45,37.86,30.76,36.04,31.75,32.81,30.5,31.1,33.23,30.95,29.26,32.66,27.74,33.99,30.93,29.89,37.15,30.04,33.12,28.33,31.49,32.03,31.24	31.99	LPRIRKGSRLQYWLHTSQKIHRALNTEPPEGSKEETAEAEPSGPEVEQQQ	QQQDQPTAPEGWKRARRAVDKERRVRFLLEPAVVVAPEADAEAEAAPREG	HHHHHH GGGHHHHHHHHHHHHHH	S
O60422	O60422_p_2_1	7	151	157	P	O60422_1	33	130	162	0.797	0.797	PPPPPPP		64.25,69.6,67.94,65.36,68.37,71.81,51.13	67.94	AAAVAGAHGGHPHAHPHPAAAPPPPPPPQRLAA	S	32.09,36.99,33.5,35.27,42.0,37.33,38.09,42.76,36.43,40.34,46.07,52.93,44.49,39.93,49.24,49.41,50.08,49.57,47.16,43.38,60.56,64.25,69.6,67.94,65.36,68.37,71.81,51.13,36.85,42.39,37.58,37.18,41.81	43.38	TYTTLTPLQHLPPLAAVADKFHQHAAAAAVAGAHGGHPHAHPHPAAAPPP	PPPPQRLAASVSGSFTLMRDERAALASVGHLYGPYGKELPAMGSPLSPLP	SSSSSSS S	S
O60422	O60422_p_3_1	9	216	224	P	O60422_2	41	199	239	0.82	0.82	PPPPPPPPP		65.38,69.96,73.95,71.49,73.1,73.24,69.16,67.45,55.71	69.96	LSPLPNALPPALHGAPQPPPPPPPPPLAAYGPPGHLAGDKL		49.98,47.13,45.32,45.56,49.8,39.41,41.99,45.88,53.46,51.71,42.69,38.54,47.34,35.75,46.16,50.29,49.74,65.38,69.96,73.95,71.49,73.1,73.24,69.16,67.45,55.71,44.08,41.07,35.13,43.21,42.74,45.69,46.84,39.79,45.64,43.12,40.97,42.0,43.03,44.72,45.61	45.69	LMRDERAALASVGHLYGPYGKELPAMGSPLSPLPNALPPALHGAPQPPPP	PPPPPLAAYGPPGHLAGDKLLPPAAFEPHAALLGRAEDALARGLPGGGGG	S
O60481	O60481_p_2_1	11	87	97	H	O60481_1	42	66	107	0.65	0.65	HHHHHHHHHHH		37.29,36.6,45.21,40.74,40.69,44.97,37.07,42.24,35.1,41.77,35.08	40.69	LSSGQSSAFTPQGSGYANALGHHHHHHHHHHHTSQVPSYGGA		35.21,31.2,27.84,28.92,32.82,28.93,31.63,28.01,26.7,26.99,47.47,28.27,28.88,35.33,30.48,31.77,32.7,28.6,40.71,35.97,33.53,37.29,36.6,45.21,40.74,40.69,44.97,37.07,42.24,35.1,41.77,35.08,28.36,36.85,29.54,27.79,31.68,30.63,41.91,30.43,27.73,34.3	32.76	DSTHAAAAAAAAAAFKLSPAAAHDLSSGQSSAFTPQGSGYANALGHHHHH	HHHHHHTSQVPSYGGAASAAFNSTREFLFRQRSSGLSEAASGGGQHGLFA		HHHHHHHHHS
O60551	O60551_p_1_1	6	46	51	K	O60551_1	89	1	89	0.52	0.52	KKKKKK		38.16,38.24,39.42,40.76,34.74,40.73	38.83	MAEDSESAASQQSLELDDQDTCGIDGDNEEETEHAKGSPGGYLGAKKKKKKQKRKKEKPNSGGTKSDSASDSQEIKIQQPSKNPSVPMQ	B EE HH	28.16,28.16,30.01,30.33,32.24,31.43,33.06,30.79,30.42,31.97,31.61,28.7,33.51,35.02,38.37,45.69,40.08,40.4,31.69,30.28,25.15,28.06,25.16,30.35,31.26,27.36,30.09,31.83,34.4,35.65,31.86,34.69,31.02,37.13,36.45,36.14,33.41,38.16,36.02,35.35,29.09,38.32,35.68,36.43,35.4,38.16,38.24,39.42,40.76,34.74,40.73,41.0,36.5,38.92,33.35,37.46,37.06,35.36,41.22,36.24,37.05,35.5,35.3,37.1,40.0,39.96,34.52,38.64,3…	35.68	||MAEDSESAASQQSLELDDQDTCGIDGDNEEETEHAKGSPGGYLGAKKK	KKKQKRKKEKPNSGGTKSDSASDSQEIKIQQPSKNPSVPMQKLQDIQRAM	|| B EE	HHHHHHHHHHH
O60583	O60583_p_1_1	7	611	617	S	O60583_2	156	497	652	0.579	0.579	SSSSSSS		43.27,43.24,43.93,42.03,42.01,42.31,41.81	42.31	DKKEKSGSLKLRIPIPPTDKSASKEELKMKIKVSSSERHSSSDEGSGKSKHSSPHISRDHKEKHKEHPSSRHHTSSHKHSHSHSGSSSGGSKHSADGIPPTVLRSPVGLSSDGISSSSSSSRKRLHVNDASHNHHSKMSKSSKSSGSSSSSSSSVK		34.59,37.18,33.83,38.04,35.51,31.94,35.64,35.84,38.61,34.79,39.87,36.13,48.96,38.67,42.12,52.3,40.59,34.84,40.67,34.91,35.19,33.91,39.32,35.75,39.66,34.89,39.92,38.99,46.17,40.87,48.63,37.94,44.41,41.75,34.2,42.99,38.87,44.63,44.22,51.8,43.65,45.23,47.28,46.95,47.27,43.72,46.04,43.64,49.27,44.28,44.91,38.33,37.6,46.53,33.12,43.62,38.75,36.02,40.22,43.9,41.13,40.05,44.11,44.72,47.52,40.16,40.66,38…	41.065	PSSRHHTSSHKHSHSHSGSSSGGSKHSADGIPPTVLRSPVGLSSDGISSS	SSSSRKRLHVNDASHNHHSKMSKSSKSSGSSSSSSSSVKQYISSHNSVFN
O60583	O60583_p_2_1	8	643	650	S	O60583_2	156	497	652	0.579	0.579	SSSSSSSS		32.99,36.83,35.73,35.54,36.64,35.07,35.27,33.54	35.405	DKKEKSGSLKLRIPIPPTDKSASKEELKMKIKVSSSERHSSSDEGSGKSKHSSPHISRDHKEKHKEHPSSRHHTSSHKHSHSHSGSSSGGSKHSADGIPPTVLRSPVGLSSDGISSSSSSSRKRLHVNDASHNHHSKMSKSSKSSGSSSSSSSSVK		34.59,37.18,33.83,38.04,35.51,31.94,35.64,35.84,38.61,34.79,39.87,36.13,48.96,38.67,42.12,52.3,40.59,34.84,40.67,34.91,35.19,33.91,39.32,35.75,39.66,34.89,39.92,38.99,46.17,40.87,48.63,37.94,44.41,41.75,34.2,42.99,38.87,44.63,44.22,51.8,43.65,45.23,47.28,46.95,47.27,43.72,46.04,43.64,49.27,44.28,44.91,38.33,37.6,46.53,33.12,43.62,38.75,36.02,40.22,43.9,41.13,40.05,44.11,44.72,47.52,40.16,40.66,38…	41.065	TVLRSPVGLSSDGISSSSSSSRKRLHVNDASHNHHSKMSKSSKSSGSSSS	SSSSVKQYISSHNSVFNHPLPPPPPVTYQVGYGHLSTLVKLDKKPVETNG
O60610	O60610_p_1_1	13	608	620	P	O60610_2	183	573	755	0.819	0.819	PPPPPPPPPPPPP		50.23,56.88,62.52,64.55,67.82,66.8,69.89,68.65,65.87,65.33,64.77,62.45,61.09	64.77	PPSVPSRAPVPPAPPLPGDSGTIIPPPPAPGDSTTPPPPPPPPPPPPPLPGGVCISSPPSLPGGTAISPPPPLSGDATIPPPPPLPEGVGIPSPSSLPGGTAIPPPPPLPGSARIPPPPPPLPGSAGIPPPPPPLPGEAGMPPPPPPLPGGPGIPPPPPFPGGPGIPPPPPGMGMPPPPPFGF		57.15,54.32,40.25,46.53,52.62,44.22,40.82,46.67,44.57,41.77,47.27,43.37,43.15,48.73,44.18,47.77,44.33,34.33,37.14,37.63,38.22,34.03,31.15,39.13,41.98,40.22,39.75,42.5,41.1,43.5,48.66,42.95,41.65,40.78,43.6,50.23,56.88,62.52,64.55,67.82,66.8,69.89,68.65,65.87,65.33,64.77,62.45,61.09,47.37,43.61,41.3,41.67,38.74,36.25,35.79,38.75,40.84,44.28,43.62,39.63,34.24,40.7,38.53,38.34,36.82,36.85,38.69,36.1…	43.37	SLSAAAITVPPSVPSRAPVPPAPPLPGDSGTIIPPPPAPGDSTTPPPPPP	PPPPPPPLPGGVCISSPPSLPGGTAISPPPPLSGDATIPPPPPLPEGVGI	TS
O60610	O60610_p_2_1	6	688	693	P	O60610_2	183	573	755	0.819	0.819	PPPPPP		58.06,53.79,58.14,63.22,57.37,39.84	57.715	PPSVPSRAPVPPAPPLPGDSGTIIPPPPAPGDSTTPPPPPPPPPPPPPLPGGVCISSPPSLPGGTAISPPPPLSGDATIPPPPPLPEGVGIPSPSSLPGGTAIPPPPPLPGSARIPPPPPPLPGSAGIPPPPPPLPGEAGMPPPPPPLPGGPGIPPPPPFPGGPGIPPPPPGMGMPPPPPFGF		57.15,54.32,40.25,46.53,52.62,44.22,40.82,46.67,44.57,41.77,47.27,43.37,43.15,48.73,44.18,47.77,44.33,34.33,37.14,37.63,38.22,34.03,31.15,39.13,41.98,40.22,39.75,42.5,41.1,43.5,48.66,42.95,41.65,40.78,43.6,50.23,56.88,62.52,64.55,67.82,66.8,69.89,68.65,65.87,65.33,64.77,62.45,61.09,47.37,43.61,41.3,41.67,38.74,36.25,35.79,38.75,40.84,44.28,43.62,39.63,34.24,40.7,38.53,38.34,36.82,36.85,38.69,36.1…	43.37	PPPPLSGDATIPPPPPLPEGVGIPSPSSLPGGTAIPPPPPLPGSARIPPP	PPPLPGSAGIPPPPPPLPGEAGMPPPPPPLPGGPGIPPPPPFPGGPGIPP
O60610	O60610_p_3_1	6	701	706	P	O60610_2	183	573	755	0.819	0.819	PPPPPP		49.87,46.08,61.74,66.97,60.03,47.27	54.95	PPSVPSRAPVPPAPPLPGDSGTIIPPPPAPGDSTTPPPPPPPPPPPPPLPGGVCISSPPSLPGGTAISPPPPLSGDATIPPPPPLPEGVGIPSPSSLPGGTAIPPPPPLPGSARIPPPPPPLPGSAGIPPPPPPLPGEAGMPPPPPPLPGGPGIPPPPPFPGGPGIPPPPPGMGMPPPPPFGF		57.15,54.32,40.25,46.53,52.62,44.22,40.82,46.67,44.57,41.77,47.27,43.37,43.15,48.73,44.18,47.77,44.33,34.33,37.14,37.63,38.22,34.03,31.15,39.13,41.98,40.22,39.75,42.5,41.1,43.5,48.66,42.95,41.65,40.78,43.6,50.23,56.88,62.52,64.55,67.82,66.8,69.89,68.65,65.87,65.33,64.77,62.45,61.09,47.37,43.61,41.3,41.67,38.74,36.25,35.79,38.75,40.84,44.28,43.62,39.63,34.24,40.7,38.53,38.34,36.82,36.85,38.69,36.1…	43.37	PPPLPEGVGIPSPSSLPGGTAIPPPPPLPGSARIPPPPPPLPGSAGIPPP	PPPLPGEAGMPPPPPPLPGGPGIPPPPPFPGGPGIPPPPPGMGMPPPPPF
O60610	O60610_p_4_1	6	714	719	P	O60610_2	183	573	755	0.819	0.819	PPPPPP		48.59,52.24,49.08,58.44,62.8,51.39	51.815	PPSVPSRAPVPPAPPLPGDSGTIIPPPPAPGDSTTPPPPPPPPPPPPPLPGGVCISSPPSLPGGTAISPPPPLSGDATIPPPPPLPEGVGIPSPSSLPGGTAIPPPPPLPGSARIPPPPPPLPGSAGIPPPPPPLPGEAGMPPPPPPLPGGPGIPPPPPFPGGPGIPPPPPGMGMPPPPPFGF		57.15,54.32,40.25,46.53,52.62,44.22,40.82,46.67,44.57,41.77,47.27,43.37,43.15,48.73,44.18,47.77,44.33,34.33,37.14,37.63,38.22,34.03,31.15,39.13,41.98,40.22,39.75,42.5,41.1,43.5,48.66,42.95,41.65,40.78,43.6,50.23,56.88,62.52,64.55,67.82,66.8,69.89,68.65,65.87,65.33,64.77,62.45,61.09,47.37,43.61,41.3,41.67,38.74,36.25,35.79,38.75,40.84,44.28,43.62,39.63,34.24,40.7,38.53,38.34,36.82,36.85,38.69,36.1…	43.37	SSLPGGTAIPPPPPLPGSARIPPPPPPLPGSAGIPPPPPPLPGEAGMPPP	PPPLPGGPGIPPPPPFPGGPGIPPPPPGMGMPPPPPFGFGVPAAPVLPFG		GGG
O60641	O60641_p_1_1	6	361	366	A	O60641_2	40	341	380	0.859	0.859	AAAAAA		30.39,30.13,28.01,30.78,30.25,29.86	30.19	STSKPSSDLLDLQPDFSSGGAAAAAAPAPPPPAGGATAWG	TT	29.64,26.85,31.32,27.62,37.7,34.01,32.86,35.65,36.07,48.06,38.94,41.14,41.13,42.88,36.07,33.99,35.8,34.38,35.98,29.37,30.39,30.13,28.01,30.78,30.25,29.86,31.84,35.9,34.15,33.62,43.45,36.14,29.71,30.04,27.59,30.51,29.69,29.42,34.8,34.79	33.805	PNSTPAKTIDTSPPVDLFATASAAVPVSTSKPSSDLLDLQPDFSSGGAAA	AAAPAPPPPAGGATAWGDLLGEDSLAALSSVPSEAQISDPFAPEPTPPTT	TT	TTSTT S GGGS
O60706	O60706_p_1_1	7	955	961	E	O60706_1	24	944	967	0.252	0.252	EEEEEEE	HHHHHHH	36.65,34.77,34.2,34.11,34.84,35.16,34.9	34.84	REAKAQMEDEDEEEEEEEDEDDNM	GTTTTTTTHHHHHHHHHHHHHHHH	43.02,37.99,34.96,35.87,38.43,37.72,35.07,37.7,37.41,36.15,36.57,36.65,34.77,34.2,34.11,34.84,35.16,34.9,37.14,37.52,40.8,43.04,48.4,41.62	36.895	EHWKTLMNRQDQELEKDMEADQTTLERKTLRRAMYSREAKAQMEDEDEEE	EEEEDEDDNMSTVMRLRTKMPWKTCWRYLTSGGFFLLILMIFSKLLKHSV	HHHHHHHHHHHHHHHHHHTT SSGGGTGGGTSGGGTTTTTTTHHHHHH	HHHHHHHHHHHHHHHHHHS HHHHHHHHHHT HHHHHHHHHHHHHHHHH
O60721	O60721_p_1_1	9	860	868	E	O60721_4	212	690	901	0.44	0.44	EEEEEEEEE	THHHHHHHH	47.95,47.9,48.43,52.61,56.52,58.73,60.37,64.93,65.62	56.52	EKEEESLNQGARAQPQAKAESKPEEEEPAKLPAVTVTPAPVPDIKGDQKENPGGQEDVAEAESTGEMPGEEGETAGEGETEEKSGGETQPEGEGETETQGKGEECEDENEAEGKGDNEGEDEGEIHAEDGEMKGNEGETESQELSAENHGEAKNDEKGVEDGGGSDGGDSEEEEEEEEEQEEEEEEEEQEEEEEEEEEEEEKGNEEPLSLDW	HHHHHHHHHHTT TTHHHHHHHHHHHHHHHHHHHHHHHHHHHHHHHTT	54.43,52.88,54.41,53.04,49.57,49.46,51.45,50.0,42.85,39.49,40.27,35.26,34.04,34.05,31.99,31.61,29.26,32.95,32.37,31.98,32.8,30.68,35.59,30.84,30.53,36.14,37.72,38.67,37.63,42.23,38.42,42.08,38.86,37.95,34.33,35.54,36.96,37.93,35.76,38.32,38.31,41.15,35.84,37.74,36.53,33.09,36.88,33.64,33.3,36.14,34.98,41.33,32.07,29.75,32.63,36.94,37.25,38.58,35.62,36.56,35.65,38.35,35.95,37.75,35.13,36.19,36.5,3…	36.28	IHAEDGEMKGNEGETESQELSAENHGEAKNDEKGVEDGGGSDGGDSEEEE	EEEEEQEEEEEEEEQEEEEEEEEEEEEKGNEEPLSLDWPETRQKQAIYLF	TTHHH	HHHHHHHHHHHHHHHHHHHHHHHHHHHHTT SSHHHHHHHHH
O60721	O60721_p_2_1	8	870	877	E	O60721_4	212	690	901	0.44	0.44	EEEEEEEE	HHHHHHHH	70.71,71.57,68.59,71.02,73.18,70.48,69.05,69.93	70.595	EKEEESLNQGARAQPQAKAESKPEEEEPAKLPAVTVTPAPVPDIKGDQKENPGGQEDVAEAESTGEMPGEEGETAGEGETEEKSGGETQPEGEGETETQGKGEECEDENEAEGKGDNEGEDEGEIHAEDGEMKGNEGETESQELSAENHGEAKNDEKGVEDGGGSDGGDSEEEEEEEEEQEEEEEEEEQEEEEEEEEEEEEKGNEEPLSLDW	HHHHHHHHHHTT TTHHHHHHHHHHHHHHHHHHHHHHHHHHHHHHHTT	54.43,52.88,54.41,53.04,49.57,49.46,51.45,50.0,42.85,39.49,40.27,35.26,34.04,34.05,31.99,31.61,29.26,32.95,32.37,31.98,32.8,30.68,35.59,30.84,30.53,36.14,37.72,38.67,37.63,42.23,38.42,42.08,38.86,37.95,34.33,35.54,36.96,37.93,35.76,38.32,38.31,41.15,35.84,37.74,36.53,33.09,36.88,33.64,33.3,36.14,34.98,41.33,32.07,29.75,32.63,36.94,37.25,38.58,35.62,36.56,35.65,38.35,35.95,37.75,35.13,36.19,36.5,3…	36.28	NEGETESQELSAENHGEAKNDEKGVEDGGGSDGGDSEEEEEEEEEQEEEE	EEEEQEEEEEEEEEEEEKGNEEPLSLDWPETRQKQAIYLFLLPIVFPLWL	TTHHHHHHHHHHHHH	HHHHHHHHHHHHHHHHHHTT SSHHHHHHHHHHHHHHHHHHH
O60721	O60721_p_3_1	12	879	890	E	O60721_4	212	690	901	0.44	0.44	EEEEEEEEEEEE	HHHHHHHHHHHH	65.83,66.78,65.84,64.82,61.06,60.24,55.29,53.42,50.82,47.47,44.92,45.57	57.765	EKEEESLNQGARAQPQAKAESKPEEEEPAKLPAVTVTPAPVPDIKGDQKENPGGQEDVAEAESTGEMPGEEGETAGEGETEEKSGGETQPEGEGETETQGKGEECEDENEAEGKGDNEGEDEGEIHAEDGEMKGNEGETESQELSAENHGEAKNDEKGVEDGGGSDGGDSEEEEEEEEEQEEEEEEEEQEEEEEEEEEEEEKGNEEPLSLDW	HHHHHHHHHHTT TTHHHHHHHHHHHHHHHHHHHHHHHHHHHHHHHTT	54.43,52.88,54.41,53.04,49.57,49.46,51.45,50.0,42.85,39.49,40.27,35.26,34.04,34.05,31.99,31.61,29.26,32.95,32.37,31.98,32.8,30.68,35.59,30.84,30.53,36.14,37.72,38.67,37.63,42.23,38.42,42.08,38.86,37.95,34.33,35.54,36.96,37.93,35.76,38.32,38.31,41.15,35.84,37.74,36.53,33.09,36.88,33.64,33.3,36.14,34.98,41.33,32.07,29.75,32.63,36.94,37.25,38.58,35.62,36.56,35.65,38.35,35.95,37.75,35.13,36.19,36.5,3…	36.28	AENHGEAKNDEKGVEDGGGSDGGDSEEEEEEEEEQEEEEEEEEQEEEEEE	EEEEEEKGNEEPLSLDWPETRQKQAIYLFLLPIVFPLWLTVPDVRRQESR	TTHHHHHHHHHHHHHHHHHHHHHHHH	HHHHHHHTT SSHHHHHHHHHHHHHHHHHHHHS SSSTTTG
O60741	O60741_p_1_1	12	63	74	G	O60741_1	86	1	86	0.718	0.718	GGGGGGGGGGGG		32.94,33.45,32.77,35.53,35.72,37.66,37.02,38.02,37.44,38.09,37.53,40.13	37.23	MEGGGKPNSSSNSRDDGNSVFPAKASATGAGPAAAEKRLGTPPGGGGAGAKEHGNSVCFKVDGGGGGGGGGGGGEEPAGGFEDAEG	H	33.97,36.4,37.64,39.62,43.64,40.58,46.33,42.89,34.96,39.26,38.36,39.07,39.82,41.11,39.61,40.95,38.51,39.16,38.22,37.26,33.82,38.97,36.93,31.71,37.27,33.41,37.87,37.55,35.92,38.93,36.9,40.18,33.2,36.35,35.4,34.81,36.21,31.9,37.35,32.54,36.22,36.45,36.44,34.2,32.99,31.88,30.5,35.72,31.5,35.53,33.37,33.71,36.67,33.52,33.54,34.96,34.58,29.35,34.69,30.51,36.82,34.67,32.94,33.45,32.77,35.53,35.72,37.66…	36.705	SVFPAKASATGAGPAAAEKRLGTPPGGGGAGAKEHGNSVCFKVDGGGGGG	GGGGGGEEPAGGFEDAEGPRRQYGFMQRQFTSMLQPGVNKFSLRMFGSQK		HHHHHHHHHHHHHHHHTS SSHHHHHHHSSHH
O60832	O60832_p_1_1	8	498	505	K	O60832_1	72	443	514	0.458	0.458	KKKKKKKK		35.74,29.11,35.29,29.26,36.18,28.82,34.6,35.02	34.81	KTAKRKRESESESDETPPAAPQLIKKEKKKSKKDKKAKAGLESGAEPGDGDSDTTKKKKKKKKAKEVELVSE		26.98,32.6,31.52,26.52,31.6,26.52,31.16,29.06,27.59,34.3,29.28,34.16,32.34,31.79,37.45,33.86,49.43,44.49,38.83,35.8,36.11,36.12,37.58,35.28,31.75,23.38,31.12,29.82,24.05,25.86,27.55,29.89,25.56,29.0,30.03,26.98,29.82,30.11,36.04,32.07,32.87,34.72,35.39,32.32,33.81,37.52,39.99,35.7,35.04,33.37,31.61,34.02,31.28,35.24,29.95,35.74,29.11,35.29,29.26,36.18,28.82,34.6,35.02,30.21,36.2,37.51,36.61,42.86…	33.12	ESESDETPPAAPQLIKKEKKKSKKDKKAKAGLESGAEPGDGDSDTTKKKK	KKKKAKEVELVSE|||||||||||||||||||||||||||||||||||||		|||||||||||||||||||||||||||||||||||||
O60840	O60840_p_1_1	17	809	825	E	O60840_4	64	767	830	0.43	0.43	EEEEEEEEEEEEEEEEE	S SSSGGGTTTT TT	26.84,28.3,30.03,28.74,31.08,32.84,30.69,31.57,33.27,32.13,30.9,33.47,33.33,31.08,29.52,29.07,27.83	30.9	GTAKDKGGEKSNEKDLPQENEGLVPGVEKEEEEGARREGADMEEEEEEEEEEEEEEEEEGAGGV	HHHHHHHHHHHHHHH S SSSGGGTTTT TT SS	53.29,53.85,51.95,52.06,54.22,53.34,45.48,49.21,51.23,52.28,52.03,50.83,52.35,51.02,49.76,38.19,38.62,36.11,34.15,32.57,32.61,34.36,32.58,35.92,33.4,31.03,31.09,28.66,24.41,28.39,26.91,28.02,28.57,29.82,31.16,28.92,31.22,28.41,28.97,28.55,30.56,27.89,26.84,28.3,30.03,28.74,31.08,32.84,30.69,31.57,33.27,32.13,30.9,33.47,33.33,31.08,29.52,29.07,27.83,29.0,26.22,26.21,30.01,27.05	31.19	GTAKDKGGEKSNEKDLPQENEGLVPGVEKEEEEGARREGADMEEEEEEEE	EEEEEEEEEGAGGVELLQEVVPKEKVVPIPEGSAFFCLSQTNPLRKGCHT	HHHHHHHHHHHHHHH S SSSGG	GTTTT TT SS SS BTTTB TT HHHHHHHH
O60840	O60840_p_2_1	6	1640	1645	E	O60840_5	118	1637	1754	0.59	0.59	EEEEEE		26.24,26.96,27.68,26.97,27.7,28.04	27.325	CDTEEEEEEGQEGVEEEDEKDLETNKATMVSQPSARRGSGISVSLPVGDRLPDSLSFGPSDDDRGTPTSSQPSVPQAGSNTHRRGSGALIFTIPEEGNSQPKGTKGQNKQDEDEEVPD	S	28.36,30.77,29.49,26.24,26.96,27.68,26.97,27.7,28.04,31.79,27.14,27.68,28.34,27.8,26.93,27.88,27.48,28.21,28.34,30.37,29.85,35.97,34.73,28.57,27.99,31.72,31.64,29.38,30.85,30.03,34.9,32.0,35.4,32.76,32.41,32.9,31.59,31.85,31.48,34.19,31.74,31.42,33.41,30.95,30.23,38.93,32.69,32.07,25.66,28.06,31.06,40.97,30.86,32.2,31.43,30.27,30.67,31.14,36.69,27.44,32.11,33.89,33.81,33.94,32.67,29.38,34.3,26.15…	29.94	FRKFRRRKEKGLLGNDAAPSTSSALQAGLRSLQDLGPEMRQALTCDTEEE	EEEGQEGVEEEDEKDLETNKATMVSQPSARRGSGISVSLPVGDRLPDSLS	HHHHHHHHHHH S HHHHHHHHHHHHHHHHHHHHTTS	S
O60841	O60841_p_1_1	12	532	543	E	O60841_2	179	430	608	0.462	0.462	EEEEEEEEEEEE		28.35,30.84,32.7,29.25,29.45,27.94,28.69,28.94,28.75,28.68,27.29,28.32	28.72	GVEVPSKDSLPKKRPIYEDKKRKKIPQQLESKEVSESMELCAAVEVMEQGVPEKEETPPPVEPEEEEDTEDAGLDDWEAMASDEETEKVEGNKVHIEVKENPEEEEEEEEEEEEDEESEEEEEEEGESEGSEGDEEDEKVSDEKDSGKTLDKKPSKEMSSDSEYDSDDDRTKEERAYDK	T S SSGGGT S HHHHHHHH	63.97,59.17,50.55,56.97,44.3,41.58,36.51,36.44,34.33,43.0,36.8,31.14,36.55,34.96,41.28,34.11,32.99,36.28,32.4,36.39,32.91,31.44,30.47,30.22,35.63,34.86,31.43,34.55,30.54,28.37,27.5,28.39,28.21,27.95,28.33,29.3,30.64,31.99,28.88,37.78,27.64,32.95,29.26,29.64,27.58,27.86,27.48,30.65,26.69,27.25,32.38,36.91,29.53,28.53,30.58,35.63,33.28,38.51,43.41,34.52,39.72,34.96,33.85,31.52,26.67,25.9,25.42,28.6…	32.91	PPVEPEEEEDTEDAGLDDWEAMASDEETEKVEGNKVHIEVKENPEEEEEE	EEEEEEDEESEEEEEEEGESEGSEGDEEDEKVSDEKDSGKTLDKKPSKEM	S SSGGGT S
O60841	O60841_p_2_1	7	548	554	E	O60841_2	179	430	608	0.462	0.462	EEEEEEE		29.25,30.77,28.52,32.27,32.63,28.57,34.97	30.77	GVEVPSKDSLPKKRPIYEDKKRKKIPQQLESKEVSESMELCAAVEVMEQGVPEKEETPPPVEPEEEEDTEDAGLDDWEAMASDEETEKVEGNKVHIEVKENPEEEEEEEEEEEEDEESEEEEEEEGESEGSEGDEEDEKVSDEKDSGKTLDKKPSKEMSSDSEYDSDDDRTKEERAYDK	T S SSGGGT S HHHHHHHH	63.97,59.17,50.55,56.97,44.3,41.58,36.51,36.44,34.33,43.0,36.8,31.14,36.55,34.96,41.28,34.11,32.99,36.28,32.4,36.39,32.91,31.44,30.47,30.22,35.63,34.86,31.43,34.55,30.54,28.37,27.5,28.39,28.21,27.95,28.33,29.3,30.64,31.99,28.88,37.78,27.64,32.95,29.26,29.64,27.58,27.86,27.48,30.65,26.69,27.25,32.38,36.91,29.53,28.53,30.58,35.63,33.28,38.51,43.41,34.52,39.72,34.96,33.85,31.52,26.67,25.9,25.42,28.6…	32.91	AGLDDWEAMASDEETEKVEGNKVHIEVKENPEEEEEEEEEEEEDEESEEE	EEEEGESEGSEGDEEDEKVSDEKDSGKTLDKKPSKEMSSDSEYDSDDDRT	SSGGGT S
O60879	O60879_p_1_1	6	562	567	P	O60879_2	59	536	594	0.844	0.844	PPPPPP		53.48,49.4,48.43,56.91,60.75,47.39	51.44	RTQAQVLSSSSGIPGPPAAPPLPGVGPPPPPPAPPLPGGAPLPPPPPPLPGMMGIPPPP	HHHHHHHHTT	76.29,70.4,68.45,61.57,55.74,55.02,52.26,51.59,42.93,43.28,39.6,32.02,37.22,33.38,29.01,39.23,38.25,31.44,38.66,37.95,34.29,40.23,39.74,38.13,41.82,35.96,53.48,49.4,48.43,56.91,60.75,47.39,44.27,58.0,38.1,38.92,45.62,34.35,30.37,39.13,36.71,35.36,48.4,40.76,36.81,42.54,41.75,27.89,31.08,31.03,29.48,26.7,28.75,26.05,27.66,31.05,29.44,34.55,35.47	38.92	QAELQKRDEKIKELEAEIQQLRTQAQVLSSSSGIPGPPAAPPLPGVGPPP	PPPAPPLPGGAPLPPPPPPLPGMMGIPPPPPPPLLFGGPPPPPPLGGVPP	HHHHHHHHHHHHHHHHHHHHHHHHHHHHHTT	S
O60879	O60879_p_2_1	6	578	583	P	O60879_2	59	536	594	0.844	0.844	PPPPPP		48.4,40.76,36.81,42.54,41.75,27.89	41.255	RTQAQVLSSSSGIPGPPAAPPLPGVGPPPPPPAPPLPGGAPLPPPPPPLPGMMGIPPPP	HHHHHHHHTT	76.29,70.4,68.45,61.57,55.74,55.02,52.26,51.59,42.93,43.28,39.6,32.02,37.22,33.38,29.01,39.23,38.25,31.44,38.66,37.95,34.29,40.23,39.74,38.13,41.82,35.96,53.48,49.4,48.43,56.91,60.75,47.39,44.27,58.0,38.1,38.92,45.62,34.35,30.37,39.13,36.71,35.36,48.4,40.76,36.81,42.54,41.75,27.89,31.08,31.03,29.48,26.7,28.75,26.05,27.66,31.05,29.44,34.55,35.47	38.92	EIQQLRTQAQVLSSSSGIPGPPAAPPLPGVGPPPPPPAPPLPGGAPLPPP	PPPLPGMMGIPPPPPPPLLFGGPPPPPPLGGVPPPPGISLNLPYGMKQKK	HHHHHHHHHHHHHTT	S TT GGG
O60879	O60879_p_3_1	7	591	597	P	O60879_2	59	536	594	0.844	0.844	PPPPPPP		31.05,29.44,34.55,35.47,33.78,37.7,34.2	34.2	RTQAQVLSSSSGIPGPPAAPPLPGVGPPPPPPAPPLPGGAPLPPPPPPLPGMMGIPPPP	HHHHHHHHTT	76.29,70.4,68.45,61.57,55.74,55.02,52.26,51.59,42.93,43.28,39.6,32.02,37.22,33.38,29.01,39.23,38.25,31.44,38.66,37.95,34.29,40.23,39.74,38.13,41.82,35.96,53.48,49.4,48.43,56.91,60.75,47.39,44.27,58.0,38.1,38.92,45.62,34.35,30.37,39.13,36.71,35.36,48.4,40.76,36.81,42.54,41.75,27.89,31.08,31.03,29.48,26.7,28.75,26.05,27.66,31.05,29.44,34.55,35.47	38.92	SSSGIPGPPAAPPLPGVGPPPPPPAPPLPGGAPLPPPPPPLPGMMGIPPP	PPPPLLFGGPPPPPPLGGVPPPPGISLNLPYGMKQKKMYKPEVSMKRINW	TT	S TT GGG SS B
O60885	O60885_p_1_1	6	738	743	H	O60885_5	427	674	1100	0.622	0.622	HHHHHH		35.8,33.17,34.9,36.11,38.4,39.25	35.955	CLRKKRKPQAEKVDVIAGSSKMKGFSSSESESSSESSSSDSEDSETEMAPKSKKKGHPGREQKKHHHHHHQQMQQAPAPVPQQPPPPPQQPPPPPPPQQQQQPPPPPPPPSMPQQAAPAMKSSPPPFIATQVPVLEPQLPGSVFDPIGHFTQPILHLPQPELPPHLPQPPEHSTPPHLNQHAVVSPPALHNALPQQPSRPSNRAAALPPKPARPPAVSPALTQTPLLPQPPMAQPPQVLLEDEEPPAPPLTSMQMQLYLQQLQKVQPPTPLLPSVKVQSQPPPPLPPPPHPSVQQQLQQQPPPPPPPQPQPPPQQQHQPPPRPVHLQPMQFSTHIQQPPPPQGQQPPHPPPGQQPPPPQPAKPQQVIQHHHSPRHHKSDPYSTGHLREAPSPLMIHSPQ…	HHS THHHHHHHHHGGG	89.81,88.04,83.96,62.83,51.3,42.28,40.88,36.55,38.37,36.05,42.84,38.41,37.3,39.05,35.05,39.41,40.7,38.53,41.89,43.36,40.76,45.85,39.91,36.59,38.24,36.52,34.81,33.04,32.33,30.91,30.59,31.45,30.99,31.03,33.79,31.68,34.69,35.74,33.27,34.63,35.96,32.78,34.59,33.27,30.7,33.62,31.56,35.01,38.12,40.91,37.06,36.92,37.34,38.5,34.59,33.02,37.61,43.47,34.28,32.29,29.85,31.23,31.76,31.05,35.8,33.17,34.9,36.1…	38.51	GSSKMKGFSSSESESSSESSSSDSEDSETEMAPKSKKKGHPGREQKKHHH	HHHQQMQQAPAPVPQQPPPPPQQPPPPPPPQQQQQPPPPPPPPSMPQQAA
O60885	O60885_p_2_1	7	764	770	P	O60885_5	427	674	1100	0.622	0.622	PPPPPPP		52.46,47.86,53.51,58.53,45.51,51.23,48.96	51.23	CLRKKRKPQAEKVDVIAGSSKMKGFSSSESESSSESSSSDSEDSETEMAPKSKKKGHPGREQKKHHHHHHQQMQQAPAPVPQQPPPPPQQPPPPPPPQQQQQPPPPPPPPSMPQQAAPAMKSSPPPFIATQVPVLEPQLPGSVFDPIGHFTQPILHLPQPELPPHLPQPPEHSTPPHLNQHAVVSPPALHNALPQQPSRPSNRAAALPPKPARPPAVSPALTQTPLLPQPPMAQPPQVLLEDEEPPAPPLTSMQMQLYLQQLQKVQPPTPLLPSVKVQSQPPPPLPPPPHPSVQQQLQQQPPPPPPPQPQPPPQQQHQPPPRPVHLQPMQFSTHIQQPPPPQGQQPPHPPPGQQPPPPQPAKPQQVIQHHHSPRHHKSDPYSTGHLREAPSPLMIHSPQ…	HHS THHHHHHHHHGGG	89.81,88.04,83.96,62.83,51.3,42.28,40.88,36.55,38.37,36.05,42.84,38.41,37.3,39.05,35.05,39.41,40.7,38.53,41.89,43.36,40.76,45.85,39.91,36.59,38.24,36.52,34.81,33.04,32.33,30.91,30.59,31.45,30.99,31.03,33.79,31.68,34.69,35.74,33.27,34.63,35.96,32.78,34.59,33.27,30.7,33.62,31.56,35.01,38.12,40.91,37.06,36.92,37.34,38.5,34.59,33.02,37.61,43.47,34.28,32.29,29.85,31.23,31.76,31.05,35.8,33.17,34.9,36.1…	38.51	SETEMAPKSKKKGHPGREQKKHHHHHHQQMQQAPAPVPQQPPPPPQQPPP	PPPPQQQQQPPPPPPPPSMPQQAAPAMKSSPPPFIATQVPVLEPQLPGSV
O60885	O60885_p_3_1	8	776	783	P	O60885_5	427	674	1100	0.622	0.622	PPPPPPPP		47.96,50.42,60.5,60.85,57.74,62.08,63.01,56.18	59.12	CLRKKRKPQAEKVDVIAGSSKMKGFSSSESESSSESSSSDSEDSETEMAPKSKKKGHPGREQKKHHHHHHQQMQQAPAPVPQQPPPPPQQPPPPPPPQQQQQPPPPPPPPSMPQQAAPAMKSSPPPFIATQVPVLEPQLPGSVFDPIGHFTQPILHLPQPELPPHLPQPPEHSTPPHLNQHAVVSPPALHNALPQQPSRPSNRAAALPPKPARPPAVSPALTQTPLLPQPPMAQPPQVLLEDEEPPAPPLTSMQMQLYLQQLQKVQPPTPLLPSVKVQSQPPPPLPPPPHPSVQQQLQQQPPPPPPPQPQPPPQQQHQPPPRPVHLQPMQFSTHIQQPPPPQGQQPPHPPPGQQPPPPQPAKPQQVIQHHHSPRHHKSDPYSTGHLREAPSPLMIHSPQ…	HHS THHHHHHHHHGGG	89.81,88.04,83.96,62.83,51.3,42.28,40.88,36.55,38.37,36.05,42.84,38.41,37.3,39.05,35.05,39.41,40.7,38.53,41.89,43.36,40.76,45.85,39.91,36.59,38.24,36.52,34.81,33.04,32.33,30.91,30.59,31.45,30.99,31.03,33.79,31.68,34.69,35.74,33.27,34.63,35.96,32.78,34.59,33.27,30.7,33.62,31.56,35.01,38.12,40.91,37.06,36.92,37.34,38.5,34.59,33.02,37.61,43.47,34.28,32.29,29.85,31.23,31.76,31.05,35.8,33.17,34.9,36.1…	38.51	HPGREQKKHHHHHHQQMQQAPAPVPQQPPPPPQQPPPPPPPQQQQQPPPP	PPPPSMPQQAAPAMKSSPPPFIATQVPVLEPQLPGSVFDPIGHFTQPILH
O60885	O60885_p_4_1	7	974	980	P	O60885_5	427	674	1100	0.622	0.622	PPPPPPP		46.84,57.01,59.83,59.89,59.85,67.64,61.82	59.85	CLRKKRKPQAEKVDVIAGSSKMKGFSSSESESSSESSSSDSEDSETEMAPKSKKKGHPGREQKKHHHHHHQQMQQAPAPVPQQPPPPPQQPPPPPPPQQQQQPPPPPPPPSMPQQAAPAMKSSPPPFIATQVPVLEPQLPGSVFDPIGHFTQPILHLPQPELPPHLPQPPEHSTPPHLNQHAVVSPPALHNALPQQPSRPSNRAAALPPKPARPPAVSPALTQTPLLPQPPMAQPPQVLLEDEEPPAPPLTSMQMQLYLQQLQKVQPPTPLLPSVKVQSQPPPPLPPPPHPSVQQQLQQQPPPPPPPQPQPPPQQQHQPPPRPVHLQPMQFSTHIQQPPPPQGQQPPHPPPGQQPPPPQPAKPQQVIQHHHSPRHHKSDPYSTGHLREAPSPLMIHSPQ…	HHS THHHHHHHHHGGG	89.81,88.04,83.96,62.83,51.3,42.28,40.88,36.55,38.37,36.05,42.84,38.41,37.3,39.05,35.05,39.41,40.7,38.53,41.89,43.36,40.76,45.85,39.91,36.59,38.24,36.52,34.81,33.04,32.33,30.91,30.59,31.45,30.99,31.03,33.79,31.68,34.69,35.74,33.27,34.63,35.96,32.78,34.59,33.27,30.7,33.62,31.56,35.01,38.12,40.91,37.06,36.92,37.34,38.5,34.59,33.02,37.61,43.47,34.28,32.29,29.85,31.23,31.76,31.05,35.8,33.17,34.9,36.1…	38.51	QMQLYLQQLQKVQPPTPLLPSVKVQSQPPPPLPPPPHPSVQQQLQQQPPP	PPPPQPQPPPQQQHQPPPRPVHLQPMQFSTHIQQPPPPQGQQPPHPPPGQ	HHHHHHHHGGG
O60885	O60885_p_5_1	8	1293	1300	Q	O60885_6	224	1116	1339	0.502	0.502	QQQQQQQQ	HHHHHHHH	58.39,58.96,57.7,55.99,55.79,56.45,55.24,52.76	56.22	HSPIIRSEPFSPSLRPEPPKHPESIKAPVHLPQRPEMKPVDVGRPVIRPPEQNAPPPGAPDKDKQKQEPKTPVAPKKDLKIKNMGSWASLVQKHPTTPSSTAKSSSDSFEQFRRAAREKEEREKALKAQAEHAEKEKERLRQERMRSREDEDALEQARRAHEEARRRQEQQQQQRQEQQQQQQQQAAAVAAAATPQAQSSQPQSMLDQQRELARKREQERRRRE	S SSTTSSS HHHHHHHHHHHHHHHHHHHHHHHHHHHHHHHHHHHHHHHHHHHHHHHHHHHHHHHHHHHHHHHHHHHHHHHHHHHHHHHHHHHHHHT S THHHHHHHHHHHHHHHHHHHHH	33.45,33.37,39.48,28.68,29.34,33.43,27.83,31.39,35.82,32.0,30.43,35.23,36.11,34.22,32.75,36.12,37.98,43.64,38.6,35.78,38.83,45.0,34.39,34.32,33.28,34.29,34.91,41.68,33.68,33.93,36.21,42.44,29.33,35.73,42.06,30.07,30.91,37.23,43.66,36.91,37.78,39.66,38.87,40.21,45.07,37.6,43.03,40.67,42.82,42.81,37.19,33.33,30.48,29.46,41.42,50.72,40.32,30.05,40.26,38.45,31.21,31.09,32.61,32.25,29.01,29.07,28.43,3…	44.235	HAEKEKERLRQERMRSREDEDALEQARRAHEEARRRQEQQQQQRQEQQQQ	QQQQAAAVAAAATPQAQSSQPQSMLDQQRELARKREQERRRREAMAATID	HHHHHHHHHHHHHHHHHHHHHHHHHHHHHHHHHHHHHHHHHHHHHHHHHH	HHHHHHHHHT S THHHHHHHHHHHHHHHHHHHHHHHHTS
O60902	O60902_p_1_1	18	60	77	G	O60902_1	114	27	140	0.676	0.676	GGGGGGGGGGGGGGGGGG		48.09,50.58,51.32,51.08,48.35,46.11,47.53,47.04,47.78,45.01,48.45,43.6,47.7,43.83,45.98,44.18,45.06,46.08	47.285	EVLESGPLRGAKEPTGCTEAGRDDRSSPAVRAAGGGGGGGGGGGGGGGGGGVGGGGAGGGAGGGRSPVRELDMGAAERSREPGSPRLTEVSPELKDRKEDAKGMEDEGQTKIKQ	HHHS	56.82,54.61,56.1,58.19,48.32,44.41,42.16,48.83,44.49,40.4,45.22,48.77,46.31,54.39,51.1,45.3,40.01,51.02,44.44,48.49,45.32,53.71,54.35,50.08,50.55,51.09,54.12,60.3,50.91,57.6,49.38,53.97,54.63,48.09,50.58,51.32,51.08,48.35,46.11,47.53,47.04,47.78,45.01,48.45,43.6,47.7,43.83,45.98,44.18,45.06,46.08,47.04,48.9,45.94,41.65,42.58,48.96,46.36,43.32,46.14,48.7,40.8,41.51,43.33,44.31,42.87,52.71,47.98,47…	48.035	KKEAITYREVLESGPLRGAKEPTGCTEAGRDDRSSPAVRAAGGGGGGGGG	GGGGGGGGGVGGGGAGGGAGGGRSPVRELDMGAAERSREPGSPRLTEVSP	HHHHHHHHHHHS
O60909	O60909_p_1_1	7	59	65	S	O60909_1	42	56	97	0.835	0.835	SSSSSSS		28.23,33.43,31.25,27.97,33.45,32.3,35.92	32.3	PAASSSSSSSNCSRPNATASSSGLPEVPSALPGPTAPTLPPC	B	32.14,26.36,32.15,28.23,33.43,31.25,27.97,33.45,32.3,35.92,30.31,28.31,30.59,27.82,41.62,29.43,33.25,32.57,29.95,34.21,31.94,36.83,29.68,31.86,35.29,30.19,37.64,39.95,42.61,43.2,45.43,53.65,50.64,57.19,60.63,64.22,73.81,88.06,94.1,96.59,97.47,97.78	33.83	VCKAVLLLCLLHFLVAVILYFDVYAQHLAFFSRFSARGPAHALHPAASSS	SSSSNCSRPNATASSSGLPEVPSALPGPTAPTLPPCPDSPPGLVGRLLIE	HHHHHHHHHHHHHHHHHHHHHHHHHHHHHHHHHHHT	B SS TT B
O75037	O75037_p_1_1	6	588	593	E	O75037_2	77	552	628	0.32	0.32	EEEEEE		29.19,32.44,28.72,30.65,28.44,28.13	28.955	KKKEVRQRRKSPEKEAFKKRAKLQQENSEETDENEAEEEEEERDESGCEEEEGREDEDEDSGSEESLVDSDSDPEEK	HHHHHHHTTSS S S HHHH	60.55,65.08,62.07,46.36,50.55,53.66,49.96,45.56,44.83,38.56,30.32,32.4,32.85,32.44,29.24,31.49,32.79,35.81,31.02,28.12,31.17,27.63,31.42,31.83,30.34,32.57,33.02,32.96,34.47,31.54,34.38,34.0,30.36,32.64,29.21,33.75,29.19,32.44,28.72,30.65,28.44,28.13,31.05,29.04,34.72,31.34,30.69,30.05,27.43,27.46,34.11,27.27,31.49,30.97,29.55,30.65,34.81,32.3,36.32,33.39,36.9,31.39,34.9,31.83,32.99,34.32,37.74,35…	32.79	IRRAKQDLERLKKKEVRQRRKSPEKEAFKKRAKLQQENSEETDENEAEEE	EEERDESGCEEEEGREDEDEDSGSEESLVDSDSDPEEKEVNFQADLADLT	HHHHHHHHHHHHHHHHHHTTSS S S	HHHHHHHHHHHHHHHH
O75054	O75054_p_1_1	6	1014	1019	E	O75054_1	37	997	1033	0.35	0.35	EEEEEE		24.31,27.14,26.77,26.99,28.67,27.46	27.065	AGGKRSSPGLEEQEEEREEEEEEDDDDDDDPTERTAL	EEEEEE	39.68,32.25,27.17,25.6,25.0,26.95,27.85,52.16,27.69,25.89,27.58,28.04,28.62,25.32,28.98,24.4,30.7,24.31,27.14,26.77,26.99,28.67,27.46,28.08,29.9,28.4,30.56,34.43,36.26,40.54,46.03,52.37,59.52,73.48,77.22,80.32,84.55	28.62	KAAFQLDCSIVSRSSQDSRFAVAWYSLRTKAGGKRSSPGLEEQEEEREEE	EEEDDDDDDDPTERTALLSVGPDAVFGPEGSPWEGRLRFQRLSPVLYRLT	T EEEEEEEEE S TT EEEEEEEEEEE	EEEEEEEEE TT B TT TTTEEEEEEETTEEEEE
O75054	O75054_p_2_1	7	1020	1026	D	O75054_1	37	997	1033	0.35	0.35	DDDDDDD		28.08,29.9,28.4,30.56,34.43,36.26,40.54	30.56	AGGKRSSPGLEEQEEEREEEEEEDDDDDDDPTERTAL	EEEEEE	39.68,32.25,27.17,25.6,25.0,26.95,27.85,52.16,27.69,25.89,27.58,28.04,28.62,25.32,28.98,24.4,30.7,24.31,27.14,26.77,26.99,28.67,27.46,28.08,29.9,28.4,30.56,34.43,36.26,40.54,46.03,52.37,59.52,73.48,77.22,80.32,84.55	28.62	DCSIVSRSSQDSRFAVAWYSLRTKAGGKRSSPGLEEQEEEREEEEEEDDD	DDDDPTERTALLSVGPDAVFGPEGSPWEGRLRFQRLSPVLYRLTVLQASP	EEEEEE S TT EEEEEEEEEEE	EEEEEEEEE TT B TT TTTEEEEEEETTEEEEEE S G
O75064	O75064_p_1_1	16	895	910	Q	O75064_2	80	891	970	0.523	0.523	QQQQQQQQQQQQQQQQ	HHHHHHHHHHHHHHHH	79.71,79.26,79.61,78.88,76.98,75.93,75.46,72.96,70.19,68.86,67.98,65.57,61.72,62.51,60.56,55.31	71.575	LRERQQQQQQQQQQQQQQQQEQVSAHQEAGSSQAEPYLERPSPTRPLQRQTTWAGRSLRDPASPPGRLVKSGSLGSARGA	HHHHHHHHHHHHHHHHHHHHHHHHHTS	80.59,78.92,81.44,81.1,79.71,79.26,79.61,78.88,76.98,75.93,75.46,72.96,70.19,68.86,67.98,65.57,61.72,62.51,60.56,55.31,55.7,54.42,53.74,45.98,46.1,44.77,36.95,35.01,32.69,30.95,30.93,30.59,28.82,32.0,28.54,37.39,28.72,29.75,30.55,28.29,32.61,27.64,33.31,29.85,27.89,30.84,27.08,25.81,25.15,26.23,25.71,27.57,25.97,28.37,26.97,23.74,27.15,26.89,25.48,28.68,28.03,27.28,28.57,31.47,29.96,28.08,24.53,2…	29.905	YYNKAVLESKWPSGTPGGRLRWAKLRNVVLGAAQFRQPLRERQQQQQQQQ	QQQQQQQQEQVSAHQEAGSSQAEPYLERPSPTRPLQRQTTWAGRSLRDPA	HHHHHHHHS SHHHHHHHHHHHHHHHHHHHHHHHHHHHHHHHHHHHH	HHHHHHHHHHHHHTS
O75128	O75128_p_1_1	7	1207	1213	P	O75128_9	37	1196	1232	0.832	0.832	PPPPPPP		56.74,57.77,53.69,50.63,47.14,44.46,51.19	51.19	EDLGLLSPPAIPPPPPPPSQALSAPRTASRFSTGTLS		33.94,35.62,38.59,36.18,32.8,36.85,36.16,49.57,46.38,40.65,48.11,56.74,57.77,53.69,50.63,47.14,44.46,51.19,39.66,39.23,37.17,40.09,36.11,43.35,37.17,38.35,34.76,35.81,34.5,41.45,34.06,35.51,34.42,44.62,41.04,46.32,56.22	39.66	HSGTCSLRKVASSASEELQSFRDAALSAQGSESPLLEDLGLLSPPAIPPP	PPPPSQALSAPRTASRFSTGTLSNTADARQALMDAIRSGTGAARLRKVPL	S HHHHHHHHHHHHHHTT	HHHHHHHHHHHHHTSHHHHT
O75150	O75150_p_1_1	6	570	575	T	O75150_3	135	518	652	0.631	0.631	TTTTTT		29.4,23.94,28.57,22.79,30.45,23.96	26.265	LRAQASGSAHSTPNLGHPEDSGVSAPAPGKEEGGPGPVSTPDNRKEMAPVPGTTTTTTSVKKEELVPSEEDFQGITPGAQGPSSRGREPEARPKRELREREGPSLGPPPVASALSRADREKAKVEETKRKESELL	HHHHHT S TTSSSSHHHHHHHHHHHHHH	68.3,68.11,59.96,60.04,53.26,51.43,39.73,33.69,32.61,30.13,28.31,29.66,31.06,28.43,30.34,28.06,32.19,38.32,30.92,27.37,30.89,25.2,28.52,26.78,26.37,35.09,30.19,34.85,26.02,30.4,29.47,33.15,26.15,30.84,35.18,29.31,35.36,37.94,30.81,26.99,36.62,27.51,34.11,28.06,34.68,25.47,35.08,30.54,33.07,34.28,29.55,30.17,29.4,23.94,28.57,22.79,30.45,23.96,27.78,24.63,30.52,25.42,27.49,24.64,29.05,28.82,33.7,30…	30.13	SGSAHSTPNLGHPEDSGVSAPAPGKEEGGPGPVSTPDNRKEMAPVPGTTT	TTTSVKKEELVPSEEDFQGITPGAQGPSSRGREPEARPKRELREREGPSL	T S
O75175	O75175_p_1_1	6	397	402	G	O75175_1	295	240	534	0.733	0.733	GGGGGG		37.9,38.22,38.45,38.75,39.56,40.53	38.6	ATSPPSHSHMEDEIFNQSSSTPTSTTSSSPIPPSPANCTTENSEDDKKRGRSTDSEVSQSPAKNGSKPVHSNQHPQSPAVPPTYPSGPPPAASALSTTPGNNGVPAPAAPPSALGPKASPAPSHNSGTPAPYAQAVAPPAPSGPSTTQPRPPSVQPSGGGGGGSGGGGSSSSSNSSAGGGAGKQNGATSYSSVVADSPAEVALSSSGGNNASSQALGPPSGPHNPPPSTSKEPSAAAPTGAGGVAPGSGNNSGGPSLLVPLPVNPPSSPTPSFSDAKAAGALLNGPPQFSTAPEI	SS	33.81,34.23,36.24,40.14,40.7,31.61,36.0,33.81,34.19,43.22,42.06,32.23,38.81,38.03,31.17,30.08,34.93,32.26,30.6,36.57,31.78,38.14,31.1,38.34,30.79,30.46,33.46,41.25,36.37,43.88,40.38,46.19,41.43,38.07,43.75,33.89,37.46,31.37,39.16,37.86,38.62,40.24,39.69,42.61,41.52,41.64,41.59,44.45,38.62,39.14,38.86,41.3,39.08,39.4,37.87,40.45,37.55,40.76,41.7,38.3,42.02,37.9,41.0,39.48,43.91,43.58,46.13,44.5,42…	38.68	PSALGPKASPAPSHNSGTPAPYAQAVAPPAPSGPSTTQPRPPSVQPSGGG	GGGSGGGGSSSSSNSSAGGGAGKQNGATSYSSVVADSPAEVALSSSGGNN
O75179	O75179_p_1_1	15	96	110	G	O75179_1	143	1	143	0.696	0.696	GGGGGGGGGGGGGGG		22.17,23.71,24.03,24.96,25.43,25.61,25.18,24.98,24.1,23.78,23.32,23.58,23.2,23.83,23.52	23.83	MEKATVPVAAATAAEGEGSPPAVAAVAGPPAAAEVGGGVGGSSRARSASSPRGMVRVCDLLLKKKPPQQQHHKAKRNRTCRPPSSSESSSDSDNSGGGGGGGGGGGGGGGTSSNNSEEEEDDDDEEEEVSEVESFILDQDDLE	GGGGGGG S S S	24.63,27.03,27.94,28.29,28.14,33.05,41.47,35.71,25.79,29.88,28.26,27.76,33.31,28.17,27.55,28.2,27.26,32.47,28.7,52.27,51.76,30.98,30.96,29.93,30.87,29.85,31.13,31.96,51.84,52.65,30.79,30.28,32.46,27.8,30.42,26.79,26.37,27.44,25.93,24.45,25.68,26.59,24.13,23.55,26.4,22.07,24.32,24.29,24.11,23.16,24.42,26.33,25.81,23.27,24.32,23.45,25.87,27.98,27.84,27.28,29.81,31.21,24.18,24.88,24.12,23.89,22.7,23…	25.61	GMVRVCDLLLKKKPPQQQHHKAKRNRTCRPPSSSESSSDSDNSGGGGGGG	GGGGGGGGTSSNNSEEEEDDDDEEEEVSEVESFILDQDDLENPMLETASK	GGGGGGG S	S S SHHHHT
O75197	O75197_p_2_1	7	1482	1488	S	O75197_1	27	1475	1501	0.765	0.765	SSSSSSS		26.45,26.43,25.53,24.83,24.6,25.19,26.47	25.53	RNHVTGASSSSSSSTKATLYPPILNPP		28.85,26.99,30.1,31.28,28.01,28.06,32.89,26.45,26.43,25.53,24.83,24.6,25.19,26.47,27.44,27.13,26.7,28.32,27.83,28.36,30.36,27.37,29.17,31.49,26.49,27.86,28.75	27.83	LNFIAPGGSQHGPFTGIACGKSMMSSVSLMGGRGGVPLYDRNHVTGASSS	SSSSTKATLYPPILNPPPSPATDPSLYNMDMFYSSNIPATARPYRPYIIR		S
O75376	O75376_p_1_1	7	58	64	Q	O75376_1	177	1	177	0.638	0.638	QQQQQQQ	SS SS	36.89,37.79,35.28,31.09,34.69,33.92,35.44	35.28	MSSSGYPPNQGAFSTEQSRYPPHSVQYTFPNTRHQQEFAVPDYRSSHLEVSQASQLLQQQQQQQLRRRPSLLSEFHPGSDRPQERRTSYEPFHPGPSPVDHDSLESKRPRLEQVSDSHFQRVSAAVLPLVHPLPEGLRASADAKKDPAFGGKHEAPSSPISGQPCGDDQNASPSKLS	STTHHHHTSSS SSTT SS S SS SS S STTS	33.17,29.98,30.68,31.38,29.69,35.03,40.14,40.39,31.89,28.81,34.51,34.84,28.77,33.33,34.22,34.75,34.58,34.81,34.8,30.9,37.65,42.4,35.45,35.12,33.82,36.19,26.7,28.36,36.61,33.98,29.66,29.65,28.84,32.27,31.27,31.39,33.2,33.72,35.93,32.15,40.94,34.63,29.81,29.72,31.04,34.25,32.42,27.13,29.48,32.86,32.67,29.0,32.59,33.39,33.21,32.23,39.95,36.89,37.79,35.28,31.09,34.69,33.92,35.44,35.51,41.21,38.05,30.…	33.33	GAFSTEQSRYPPHSVQYTFPNTRHQQEFAVPDYRSSHLEVSQASQLLQQQ	QQQQLRRRPSLLSEFHPGSDRPQERRTSYEPFHPGPSPVDHDSLESKRPR	STTHHHHTSSS	SSTT SS S SS SS
O75376	O75376_p_2_1	6	598	603	A	O75376_3	136	497	632	0.431	0.431	AAAAAA		34.93,31.46,32.62,32.55,28.81,31.9	32.225	KRRGRNQQIARPSQEEKVEEKEEDKAEKTEKKEEEKKDEEEKDEKEDSKENTKEKDKIDGTAEETEEREQATPRGRKTANSQGRRKGRITRSMTNEAAAASAAAAAATEEPPPPLPPPPEPISTEPVETSRWTEEE	TSS SSSTT SS HHH	54.01,44.49,35.42,36.66,28.17,31.2,38.99,28.91,31.05,30.04,25.74,37.12,26.65,26.06,26.38,26.42,27.44,27.7,28.35,27.99,32.44,32.19,33.42,34.02,36.3,29.95,35.01,34.43,35.72,30.57,32.24,30.57,29.46,29.85,33.35,32.21,29.58,38.02,42.65,32.69,34.03,36.27,34.28,34.51,35.54,30.71,31.05,36.17,30.66,28.77,26.87,30.63,29.83,33.56,33.19,34.7,36.92,35.05,32.77,34.87,30.5,35.57,35.93,34.13,34.94,34.38,34.91,36…	33.85	KDKIDGTAEETEEREQATPRGRKTANSQGRRKGRITRSMTNEAAAASAAA	AAATEEPPPPLPPPPEPISTEPVETSRWTEEEMEVAKKGLVEHGRNWAAI		SS HHHHHHHHHHHHHSTT HHHH
O75385	O75385_p_1_1	7	302	308	S	O75385_1	76	283	358	0.746	0.746	SSSSSSS		45.07,47.05,45.0,42.03,41.4,40.31,39.79	42.03	SVRKSPPVPVPSYPSSGSGSSSSSSSTSHLASPPSLGEMQQLQKTLASPADTAGFLHSSRDSGGSKDSSCDTDDFV	TT	40.46,40.98,36.5,37.29,37.86,49.23,47.5,51.06,54.1,57.43,52.07,45.49,48.93,42.93,41.49,44.87,40.08,43.38,42.16,45.07,47.05,45.0,42.03,41.4,40.31,39.79,33.17,40.45,39.08,38.72,38.77,38.38,41.95,42.49,39.83,38.58,41.31,35.69,37.27,35.51,35.98,33.76,30.75,31.03,29.41,28.24,32.78,26.84,37.79,30.88,30.42,32.3,31.59,30.9,30.79,35.13,34.35,28.21,35.47,34.27,34.99,34.3,33.55,29.42,33.34,29.28,30.95,29.22…	37.825	LLALLQRNHKDRMDFDEFFHHPFLDASPSVRKSPPVPVPSYPSSGSGSSS	SSSSTSHLASPPSLGEMQQLQKTLASPADTAGFLHSSRDSGGSKDSSCDT	HHHHT SSTTTS HHHHHT TTT
O75444	O75444_p_1_1	6	182	187	H	O75444_2	48	175	222	0.762	0.762	HHHHHH		43.35,41.19,41.83,42.32,39.41,45.09	42.075	SGAGPHYHHHHHHAAGHHHHPTAGAPGAAGSAAASAGGAGGAGGGGPA	HS	46.77,40.93,38.8,44.89,43.21,39.86,39.4,43.35,41.19,41.83,42.32,39.41,45.09,40.1,46.41,42.7,40.12,45.64,44.41,36.15,46.59,42.69,47.13,42.47,43.58,46.63,42.71,43.75,44.72,39.37,44.74,42.12,43.33,42.79,45.66,47.47,42.52,43.07,50.22,46.09,46.61,52.79,47.63,45.09,46.0,43.08,63.71,52.02	43.465	AQQLAAAAGAGAGASLGGSGEEMGPAAAVVSAVIAAAAAQSGAGPHYHHH	HHHAAGHHHHPTAGAPGAAGSAAASAGGAGGAGGGGPASAGGGGGGGGGG	HHHHTT S HHHHHHHHHHHHHHHHHS
O75460	O75460_p_1_1	6	490	495	Q	O75460_2	69	491	559	0.622	0.622	QQQQQQ	HHHHTT	58.92,61.42,55.45,50.02,44.83,36.49	52.735	QQQQQLPFHPPGDTAQDGELLDTSGPYSESSGTSSPSTSPRASNHSLCSGSSASKAGSSPSLEQDDGDE	HHHTT	61.42,55.45,50.02,44.83,36.49,32.4,29.26,32.82,30.73,30.37,37.62,32.88,35.25,36.28,36.34,34.67,33.18,32.83,33.44,35.63,31.71,32.72,34.06,35.59,32.01,40.19,32.42,32.13,32.57,34.9,38.97,38.71,39.7,40.0,40.85,46.51,39.05,41.68,39.83,48.8,36.41,38.25,39.24,39.12,40.15,38.91,34.74,32.55,34.76,32.99,34.87,37.0,36.64,36.63,35.17,32.86,33.1,34.98,31.48,37.55,31.48,35.0,36.56,31.91,35.16,32.4,30.43,35.44,…	35.25	DMATIILSTFLLIGWVAFIITYPLSMHQQQQLQHQQFQKELEKIQLLQQQ	QQQLPFHPPGDTAQDGELLDTSGPYSESSGTSSPSTSPRASNHSLCSGSS	HHHHHHHHHHHHHHHHHHHHHHHHHHHHHHHHHHHHHHHHHHHHHHHHHH	HTT
O75525	O75525_p_1_1	6	256	261	P	O75525_1	55	213	267	0.739	0.739	PPPPPP		70.56,76.1,73.6,74.27,73.43,62.53	73.515	PVGVVVPRGTPTPRGVLSTRGPVSRGRGLLTPRARGVPPTGYRPPPPPPTQETYG		47.49,42.73,43.36,43.22,44.22,50.14,51.88,43.55,42.11,47.16,50.32,47.25,49.81,40.32,43.59,44.02,45.01,42.97,47.8,45.15,44.55,47.08,40.21,47.83,41.94,43.03,39.4,43.98,47.3,41.35,52.27,51.56,42.95,45.43,40.38,41.83,56.89,63.43,59.92,45.42,48.52,51.45,60.05,70.56,76.1,73.6,74.27,73.43,62.53,53.48,50.13,45.26,49.12,43.02,48.94	47.16	VTARPVGVVVPRGTPTPRGVLSTRGPVSRGRGLLTPRARGVPPTGYRPPP	PPPTQETYGEYDYDDGYGTAYDEQSYDSYDNSYSTPAQSGADYYDYGHGL
O75807	O75807_p_1_1	6	661	666	A	O75807_3	50	625	674	0.91	0.91	AAAAAA		40.89,37.7,42.37,43.15,43.85,47.0	42.76	APIPALTQTLPSSSVPSSPVQTTPLSQAVATPSRSSAAAAAALDLSGRRG		62.64,57.4,61.66,58.51,49.31,57.99,46.16,56.82,43.29,53.13,54.44,45.5,45.77,48.19,51.76,53.84,46.98,44.7,55.5,50.98,46.67,45.47,47.78,50.42,50.76,45.32,46.12,40.91,46.67,44.91,43.96,44.56,38.77,36.86,40.61,35.72,40.89,37.7,42.37,43.15,43.85,47.0,48.01,48.17,48.63,49.68,45.66,48.29,48.82,54.56	46.99	RAWARLRNPPLAPIPALTQTLPSSSVPSSPVQTTPLSQAVATPSRSSAAA	AAALDLSGRRG|||||||||||||||||||||||||||||||||||||||	HHHHHHHS	|||||||||||||||||||||||||||||||||||||||
O75822	O75822_p_1_1	7	2	8	A	O75822_1	108	1	108	0.537	0.537	AAAAAAA		43.39,36.25,43.41,42.58,44.6,45.29,51.9	43.41	MAAAAAAAGDSDSWDADAFSVEDPVRKVGGGGTAGGDRWEGEDEDEDVKDNWDDDDDEKKEEAEVKPEVKISEKKKIAEKIKEKERQQKKRQEEIKKRLEEPEEPKVL	TTSS TTSS S S S SS SSHHHHHHHHHHHHHHHHHHHHHHHHHHHH	38.1,43.39,36.25,43.41,42.58,44.6,45.29,51.9,45.26,42.73,45.64,58.0,53.18,62.08,51.97,51.54,44.41,56.95,43.04,48.37,61.06,41.87,42.76,42.0,39.57,45.76,34.24,36.1,28.96,27.68,27.76,33.61,34.16,39.87,40.77,42.75,55.07,58.33,62.26,53.12,47.06,57.37,50.86,47.73,43.86,43.26,58.11,52.31,49.29,62.59,52.94,66.43,49.13,49.85,38.88,43.76,35.9,34.28,34.29,32.23,28.96,27.89,31.74,31.86,37.31,32.75,44.05,33.4…	49.21	||||||||||||||||||||||||||||||||||||||||||||||MAAA	AAAAGDSDSWDADAFSVEDPVRKVGGGGTAGGDRWEGEDEDEDVKDNWDD	||||||||||||||||||||||||||||||||||||||||||||||	TTSS TTSS S S S SS
O75864	O75864_p_1_1	7	514	520	E	O75864_2	203	460	662	0.632	0.632	EEEEEEE		34.15,35.94,34.28,29.23,33.52,34.7,32.91	34.15	EREEKEQPPQLSASMPETTATEPQPDDEPAAGVQNGAPSPAPSPDSDSDSDSDGEEEEEEEGERDETPCPALVPPTDSLGPGDRSPPGSPSTPTEQRISVSSPGRGHKVFVVTRVESPPERAEPPASPTPPSPPPPPSPPASPSLPPAGAIDTRDTGSSEPQPPPEPPRSGPPLPNGLKPEFALALPPEPPPGPEVKGGSCGL	HHHHHHS SS TT GGGGGG TT	91.98,89.84,85.19,85.61,87.18,80.69,58.34,54.53,48.21,49.19,43.09,44.48,41.93,46.95,44.13,44.04,39.45,43.61,37.42,41.35,39.92,43.41,39.36,37.44,43.18,40.97,43.88,42.37,45.36,40.77,41.86,38.81,44.13,42.69,39.0,37.5,43.35,53.06,45.38,54.61,44.02,53.74,42.13,57.29,49.1,45.47,42.78,44.88,40.24,43.24,36.26,42.06,36.31,40.36,34.15,35.94,34.28,29.23,33.52,34.7,32.91,29.87,31.19,31.97,34.19,41.53,38.81,4…	39.22	PPQLSASMPETTATEPQPDDEPAAGVQNGAPSPAPSPDSDSDSDSDGEEE	EEEEGERDETPCPALVPPTDSLGPGDRSPPGSPSTPTEQRISVSSPGRGH		SS
O75909	O75909_p_1_1	6	420	425	P	O75909_1	319	262	580	0.662	0.662	PPPPPP		39.57,42.48,38.48,36.75,37.25,36.03	37.865	KQQMPHHTPHQLQQPPSLQPTPQVPQVQQSQPSQSSEPSQPQQKDPQQPAQQQQPAQQPKKPSPQPSSPRQVKRAVVVSPKEENKAAEPPPPKIPKIETTHPPLPPAHPPPDRKPPLAAALGEAEPPGPVDATDLPKVQIPPPAHPAPVHQPPPLPHRPPPPPPSSYMTGMSTTSSYMSGEGYQSLQSMMKTEGPSYGALPPAYGPPAHLPYHPHVYPPNPPPPPVPPPPASFPPPAIPPPTPGYPPPPPTYNPNFPPPPPRLPPTHAVPPHPPPGLGLPPASYPPPAVPPGGQPPVPPPIPPPGMPPVGGLGRAAWMR	TS GGGTTT HHHHHHHHHHHHS TT S	37.73,41.38,32.06,24.14,28.5,31.29,35.05,31.49,31.64,39.17,35.58,37.13,38.3,34.47,39.6,46.97,40.21,39.1,44.22,39.1,32.8,38.84,39.7,35.52,39.2,38.82,40.4,40.41,42.38,41.32,42.99,41.86,42.11,44.49,42.61,43.95,41.94,47.84,41.99,47.17,44.58,41.78,45.26,41.86,43.71,50.0,44.54,40.74,51.58,44.74,44.89,43.07,43.55,44.25,44.41,41.94,44.04,39.48,45.52,41.73,40.89,41.13,44.22,43.92,44.81,41.77,49.11,44.92,4…	42.48	DRKPPLAAALGEAEPPGPVDATDLPKVQIPPPAHPAPVHQPPPLPHRPPP	PPPSSYMTGMSTTSSYMSGEGYQSLQSMMKTEGPSYGALPPAYGPPAHLP		GGGTTT HHHHHHHHHHHHS
O75912	O75912_p_1_1	8	24	31	A	O75912_1	60	15	74	0.889	0.889	AAAAAAAA		34.35,32.74,33.97,33.39,33.08,35.27,33.61,36.85	33.79	AARGPARAPAAAAAAAASPPGPCSGAACAPSAAAGAGAMNPSSSAGEEKGATGGSSSSGS		34.06,34.3,31.13,31.69,39.77,33.0,32.13,34.34,38.02,34.35,32.74,33.97,33.39,33.08,35.27,33.61,36.85,34.84,46.38,46.14,35.39,38.44,34.8,35.54,35.74,33.88,29.5,31.41,28.29,35.11,28.06,33.17,29.79,33.56,31.09,33.38,31.84,29.84,34.73,33.54,34.96,35.13,30.25,34.8,33.5,35.91,30.26,34.27,32.87,31.98,33.04,31.24,33.01,28.87,28.85,28.92,30.42,30.77,29.28,32.11	33.385	|||||||||||||||||||||||MDAAGRGCHLLPLPAARGPARAPAAAA	AAAASPPGPCSGAACAPSAAAGAGAMNPSSSAGEEKGATGGSSSSGSGAG	|||||||||||||||||||||||
O75914	O75914_p_1_1	7	191	197	E	O75914_2	49	164	212	0.568	0.568	EEEEEEE		45.26,35.95,42.44,38.36,34.94,43.01,37.24	38.36	GYIAAHPSSTKTASEPPLAPPVSEEEDEEEEEEEDENEPPPVIAPRPEH	GG	25.64,27.94,31.91,33.96,29.01,37.16,37.94,33.34,36.9,33.81,39.01,37.47,36.58,42.01,39.42,51.42,44.23,41.98,43.81,47.28,49.69,46.25,45.66,38.98,44.65,44.32,36.62,45.26,35.95,42.44,38.36,34.94,43.01,37.24,40.78,42.55,41.5,44.56,42.54,47.42,52.54,58.29,56.92,57.91,58.58,51.89,54.49,51.31,46.27	42.44	KETVNNQKYMSFTSGDKSAHGYIAAHPSSTKTASEPPLAPPVSEEEDEEE	EEEEDENEPPPVIAPRPEHTKSIYTRSVVESIASPAVPNKEVTPPSAENA	HHHHHTHHHHS	GGG GGGS
O75971	O75971_p_1_1	10	86	95	E	O75971_1	26	73	98	0.461	0.461	EEEEEEEEEE	SSSSSSS	51.68,51.77,50.51,46.63,46.22,49.71,50.24,46.79,46.25,46.9	48.305	QTTLELSTKSHVTEEEEEEEEEESDS	T SSSSSSSS	82.71,79.58,84.21,85.65,86.76,81.41,79.32,73.97,70.65,57.42,55.72,55.89,52.91,51.68,51.77,50.51,46.63,46.22,49.71,50.24,46.79,46.25,46.9,47.25,52.03,53.72	53.315	SSRRGDEMLSSHTVPEQSHDMLVHVDNEASINQTTLELSTKSHVTEEEEE	EEEEESDS||||||||||||||||||||||||||||||||||||||||||	HHHHHHHHHHTT S SS GGG TT HHHHTT SSSSSS	SS ||||||||||||||||||||||||||||||||||||||||||
O76039	O76039_p_1_1	6	784	789	K	O76039_3	189	646	834	0.559	0.559	KKKKKK		33.78,36.33,37.33,34.01,35.07,31.52	34.54	SPQPGEQLPPEMTVARSSVKETSREGTSSFHTRQKSEGGVYHDPHSDDGTAPKENRHLYNDPVPRRVGSFYRVPSPRPDNSFHENNVSTRVSSLPSESSSGTNHSKRQPAFDPWKSPENISHSEQLKEKEKQGFFRSMKKKKKKSQTVPNSDSPDLLTLQKSIHSASTPSSRPKEWRPEKISDLQTQSQ		38.98,36.56,38.22,35.11,34.53,35.77,34.9,35.09,36.6,40.79,34.78,31.89,33.02,30.84,34.5,28.98,36.75,34.69,40.23,39.41,39.32,34.32,36.61,35.48,37.84,38.63,40.42,38.4,38.41,37.31,39.47,37.7,33.99,36.7,35.32,33.73,35.29,34.54,33.41,33.47,31.41,38.6,36.53,44.3,37.38,38.28,35.79,34.25,36.95,34.31,37.59,38.89,34.73,36.59,33.4,37.68,34.41,37.15,31.37,35.44,32.46,42.1,35.05,34.64,35.34,29.7,35.68,29.53,28…	35.48	SSLPSESSSGTNHSKRQPAFDPWKSPENISHSEQLKEKEKQGFFRSMKKK	KKKSQTVPNSDSPDLLTLQKSIHSASTPSSRPKEWRPEKISDLQTQSQPL
O76094	O76094_p_1_1	8	552	559	K	O76094_1	140	532	671	0.525	0.525	KKKKKKKK		41.11,43.28,44.1,44.9,51.55,47.5,49.79,53.39	46.2	KKGGKVTGDSQPKEQGQGDLKKKKKKKKGKLPKNYDPKVTPDPERWLPMRERSYYRGRKKGKKKDQIGKGTQGATAGASSELDASKTVSSPPTSPRPGSAATVSASTSNIIPPRHQKPAGAPATKKKQQQKKKKGGKGGW	GGS TT TTS TTTTS GGGSTT S TTTS S TT TTSSTTS TTSS S	47.1,38.38,36.33,37.17,33.2,37.71,32.37,34.27,32.2,27.66,33.21,31.78,30.99,32.68,31.74,33.02,30.25,34.13,38.87,44.12,41.11,43.28,44.1,44.9,51.55,47.5,49.79,53.39,55.29,57.65,61.41,63.04,60.49,66.2,62.42,69.27,70.33,76.37,70.22,70.34,68.1,69.9,76.06,75.13,75.68,74.85,74.69,77.48,74.68,76.07,77.08,86.06,80.6,77.92,74.58,67.03,62.57,54.54,48.0,43.1,40.04,40.46,38.07,40.23,42.5,37.63,38.0,41.12,39.14…	37.855	LPSSDSMSLKVDVEALENSAGATYIRKKGGKVTGDSQPKEQGQGDLKKKK	KKKKGKLPKNYDPKVTPDPERWLPMRERSYYRGRKKGKKKDQIGKGTQGA	S GGG HHHHHTSTTGGGTGGGS	TT TTS TTTTS GGGSTT S TTTS S TT
O94763	O94763_p_1_1	13	299	311	D	O94763_2	109	223	331	0.57	0.57	DDDDDDDDDDDDD		45.63,58.18,48.14,61.67,53.64,60.25,54.18,57.31,56.33,55.19,55.87,56.96,57.2	56.33	LLGELDSKPDTVIANGEDTTSSEEEKEDRNTNVNAMHQVTDSHTPCHKDVASSEPFSGQVNSQLNCSVNGSSSYHSDDDDDDDDDDDDDNIDDDDGDNDHEALGVGDNS	HHHHHHTS	82.78,78.87,76.15,64.78,58.78,60.03,61.06,55.32,57.21,44.99,41.34,52.11,44.83,47.17,45.53,46.9,46.25,44.56,41.26,40.97,38.36,34.29,46.52,42.49,48.04,45.59,50.1,47.17,45.47,43.63,44.31,42.39,46.19,40.26,42.03,43.96,43.12,40.57,40.05,38.96,39.53,41.81,41.66,43.93,40.47,33.66,38.98,43.6,40.65,42.86,40.4,35.38,43.24,36.12,44.09,34.64,38.03,33.15,36.41,36.14,40.36,34.34,37.83,39.08,39.82,37.83,38.83,4…	45.47	VNAMHQVTDSHTPCHKDVASSEPFSGQVNSQLNCSVNGSSSYHSDDDDDD	DDDDDDDNIDDDDGDNDHEALGVGDNSIPTIYFSHTVEPKRVRINTGKNT		EEE SS
O94827	O94827_p_1_1	6	38	43	E	O94827_1	71	1	71	0.591	0.591	EEEEEE		38.41,39.67,42.58,38.82,45.47,42.57	41.12	MHYDGHVRFDLPPQGSVLARNVSTRSCPPRTSPAVDLEEEEEESSVDGKGDRKSTGLKLSKKKARRRHTDD	TT TT B B	32.16,29.45,36.56,36.31,40.62,43.22,46.44,58.16,56.91,46.57,38.89,31.02,34.49,32.65,34.72,30.51,29.06,33.48,35.31,30.11,34.98,29.93,32.92,31.09,34.52,36.69,32.48,38.23,39.21,34.92,37.16,32.23,38.91,33.28,39.97,36.22,44.41,38.41,39.67,42.58,38.82,45.47,42.57,41.45,40.31,48.9,39.14,43.99,42.2,36.94,39.41,37.65,37.39,34.95,30.74,30.38,37.09,31.57,35.63,34.89,36.02,32.9,33.04,29.16,29.31,31.33,30.76,…	36.22	||||||||||MHYDGHVRFDLPPQGSVLARNVSTRSCPPRTSPAVDLEEE	EEESSVDGKGDRKSTGLKLSKKKARRRHTDDPSKECFTLKFDLNVDIETE	|||||||||| TT TT B	B GGGGEEEEEEESSSEEEEE
O94827	O94827_p_2_1	12	712	723	E	O94827_4	65	690	754	0.471	0.471	EEEEEEEEEEEE	HHHHHHHHHHHH	60.17,63.85,60.77,65.21,63.02,64.25,59.64,61.83,58.68,55.3,54.58,49.85	60.47	RAQEPPGSQQPLQSLEEEEDEQEEEEEEEEEEEEGEDSGTSAASSPTIMRKSSGSPDSQHCASDG	HTTS TTTT TTTHHHHHHHHHHHHHHHHHHHHHHH	87.83,84.22,72.72,63.53,50.84,42.2,40.85,38.09,36.81,29.79,30.5,34.08,36.61,37.79,40.18,44.53,48.01,48.54,50.34,53.62,58.0,52.88,60.17,63.85,60.77,65.21,63.02,64.25,59.64,61.83,58.68,55.3,54.58,49.85,47.8,43.54,38.58,33.29,34.48,31.12,34.75,32.21,30.99,30.74,30.17,38.05,38.11,35.25,36.8,38.46,34.45,37.02,37.02,35.35,35.04,44.08,38.33,34.52,35.14,32.65,35.01,35.26,37.36,40.41,41.94	38.58	GQALCRGWVDTIYNAQNQLQQLRAQEPPGSQQPLQSLEEEEDEQEEEEEE	EEEEEEGEDSGTSAASSPTIMRKSSGSPDSQHCASDGSTETLAMVVVEPG	SHHHHHHHHHHHHHHHHHHHHHHTTS TTTT TTTHHHHHHHHHHHHHHH	HHHHHHHH
O94900	O94900_p_1_1	6	251	256	K	O94900_2	73	192	264	0.488	0.488	KKKKKK		52.58,51.22,54.54,51.41,47.33,58.09	51.995	GLNMGGSNVPHNSPSPPGSKSATPSPSSSVHEDEGDDTSKINGGEKRPASDMGKKPKTPKKKKKKDPNEPQKP	TTS	48.57,54.77,44.1,49.54,41.31,40.71,38.42,43.97,51.08,57.27,46.09,48.39,43.05,66.24,51.14,71.06,61.24,45.28,55.9,48.83,52.19,49.64,54.48,57.46,42.83,56.99,42.73,46.6,46.64,58.38,58.96,50.67,57.84,48.98,60.38,46.95,54.2,52.27,50.49,48.16,58.88,45.84,44.5,44.6,47.18,45.8,48.45,44.27,44.01,54.21,47.08,60.17,49.97,49.33,52.79,56.17,51.23,52.19,58.18,52.58,51.22,54.54,51.41,47.33,58.09,56.66,69.3,67.98…	51.22	SPSPPGSKSATPSPSSSVHEDEGDDTSKINGGEKRPASDMGKKPKTPKKK	KKKDPNEPQKPVSAYALFFRDTQAAIKGQNPNATFGEVSKIVASMWDGLG		TTS HHHHHHHHHHHHHHHH TT HHHHHHHHHHHHHHS
O94916	O94916_p_1_1	10	879	888	Q	O94916_6	51	841	891	0.603	0.603	QQQQQQQQQQ	S	27.86,29.96,27.79,28.7,30.7,30.69,30.85,31.04,33.57,31.89	30.695	VSPGMFSSTEPTVHTRPDNLLPGRAESVHPQSENTLSNQQQQQQQQQQVME	S TTT	27.94,30.32,40.18,31.22,33.84,32.05,31.31,33.98,33.5,35.39,41.26,33.82,32.64,34.72,33.46,32.7,41.03,32.44,33.46,33.81,35.31,42.43,33.62,33.01,33.18,33.53,32.5,31.6,33.97,42.4,28.35,28.06,32.44,28.4,30.9,30.91,28.78,27.36,27.86,29.96,27.79,28.7,30.7,30.69,30.85,31.04,33.57,31.89,32.5,32.36,37.25	32.5	VSQIQSGVSPGMFSSTEPTVHTRPDNLLPGRAESVHPQSENTLSNQQQQQ	QQQQQVMESSAAMVMEMQQSICQAAAQIQSELFPSTASANGNLQQSPVYQ		S TTTHHHHHHHHHHHHHHHTTS
O94916	O94916_p_2_1	17	1250	1266	Q	O94916_8	94	1211	1304	0.587	0.587	QQQQQQQQQQQQQQQQQ	S	31.23,34.18,33.51,35.63,36.99,38.1,36.46,37.71,39.06,35.84,33.83,37.31,36.39,31.87,34.17,32.25,30.21	35.63	PQVALGSLPPNPMPQSQQGTMFQSQHSIVAMQSNSPSQEQQQQQQQQQQQQQQQQQSILFSNQNTMATMASPKQPPPNMIFNPNQNPMANQEQQ	S	38.94,29.19,31.44,34.36,33.9,37.55,36.87,38.74,49.11,48.13,38.17,43.58,37.31,40.67,35.19,33.83,34.18,30.0,32.92,28.44,29.61,29.27,30.12,30.74,28.84,31.44,28.62,28.76,30.86,28.51,28.41,30.68,27.27,29.09,30.86,39.25,28.78,30.32,28.57,31.23,34.18,33.51,35.63,36.99,38.1,36.46,37.71,39.06,35.84,33.83,37.31,36.39,31.87,34.17,32.25,30.21,29.75,33.56,33.27,32.0,29.71,26.69,30.47,30.22,30.79,31.43,33.95,3…	31.875	LFQPQVALGSLPPNPMPQSQQGTMFQSQHSIVAMQSNSPSQEQQQQQQQQ	QQQQQQQQQSILFSNQNTMATMASPKQPPPNMIFNPNQNPMANQEQQNQS		S
O94933	O94933_p_1_1	7	712	718	G	O94933_2	28	708	735	0.718	0.718	GGGGGGG		34.07,29.29,32.69,30.63,32.77,30.56,33.29	32.69	LFEDGGGGGGGSGGGGRPTLSSPEKAPP		33.51,31.97,34.41,29.78,34.07,29.29,32.69,30.63,32.77,30.56,33.29,32.2,34.7,31.72,34.23,33.07,31.04,35.6,28.8,34.28,33.85,30.74,37.18,33.71,30.64,33.05,34.65,31.6	32.91	FSAVFVAAGLFAYVLRRRRKKLPFRSKRQEGVDLTGIQMQCHRLFEDGGG	GGGGSGGGGRPTLSSPEKAPPVGHVYEYIPHPVTQMCNNPIYKPREEEEV	HHHHHHHHHHHHHHHHHHHTS	S
O94953	O94953_p_1_1	6	419	424	E	O94953_1	110	369	478	0.558	0.558	EEEEEE		34.36,29.54,33.7,30.51,33.74,34.88	33.72	LLRRSHRKRSQPKKPKPEDPKFPGEGTAGAALLEEAGGSVKEEAGPEVDPEEEEEEPQPLPHGREAEGAEEDGRGKLRPTKAKSERKKKSFGLLPPQLPPPPAHFPSEEA	HHHHHHHHHT	55.29,60.27,59.28,57.42,41.66,57.68,56.49,51.65,50.53,48.52,37.4,42.49,35.8,38.51,37.32,34.15,41.39,35.95,37.66,40.97,31.9,35.79,33.02,33.13,32.91,32.23,33.29,33.37,31.84,34.09,32.24,34.21,36.45,34.44,35.26,36.43,32.72,31.7,32.35,36.36,33.78,30.45,33.25,31.23,33.18,37.48,28.5,35.14,33.5,39.74,34.36,29.54,33.7,30.51,33.74,34.88,36.36,33.83,35.64,31.85,37.68,35.37,31.98,33.27,27.19,33.87,28.56,31.5…	33.685	RSHRKRSQPKKPKPEDPKFPGEGTAGAALLEEAGGSVKEEAGPEVDPEEE	EEEPQPLPHGREAEGAEEDGRGKLRPTKAKSERKKKSFGLLPPQLPPPPA	HHHHHHT
O94983	O94983_p_1_1	9	291	299	S	O94983_1	60	263	322	0.727	0.727	SSSSSSSSS		39.52,40.27,40.32,39.81,40.27,39.13,39.92,39.23,39.78	39.81	SIPHAHPPEPPPLIAPLPPELPKAHTSPSSSSSSSSSGFAEPLEIRPSPPTSRGGSSRGG		35.83,33.67,35.53,34.15,33.03,36.89,39.64,39.38,39.31,40.46,44.15,45.27,34.0,39.32,40.06,36.63,38.06,40.15,43.11,37.65,36.33,47.77,36.43,37.21,40.7,38.14,37.99,56.09,39.52,40.27,40.32,39.81,40.27,39.13,39.92,39.23,39.78,36.56,37.73,35.89,34.55,41.23,35.14,33.64,34.77,31.59,38.17,33.35,47.67,44.45,33.45,34.44,33.95,33.17,34.87,36.33,35.32,37.95,35.62,37.02	37.84	TKHRIISPKVEPRALTLTSIPHAHPPEPPPLIAPLPPELPKAHTSPSSSS	SSSSSGFAEPLEIRPSPPTSRGGSSRGGTAILLLTGLEQRAGGLTPTRHL	GGG
O94985	O94985_p_1_1	11	925	935	E	O94985_1	67	915	981	0.38	0.38	EEEEEEEEEEE		31.17,28.59,33.52,27.35,32.65,30.73,27.29,32.12,28.14,32.78,30.35	30.73	METYEDQHSSEEEEEEEEEEESEDGEEEDDITSAESESSEEEEGEQGDPQNATRQQQLEWDDSTLSY	GGG	31.07,33.64,37.26,32.92,31.86,32.39,28.99,29.01,29.94,27.13,31.17,28.59,33.52,27.35,32.65,30.73,27.29,32.12,28.14,32.78,30.35,33.35,31.29,29.66,33.23,30.59,32.82,30.56,33.29,32.12,33.26,34.55,32.91,32.8,35.74,33.08,33.52,31.7,32.57,31.83,30.84,32.45,30.82,25.02,28.62,26.84,28.25,30.35,40.9,31.22,28.96,32.04,32.27,32.93,31.78,34.84,31.57,33.15,34.89,33.12,32.88,44.98,41.48,34.03,32.72,29.78,33.14	32.12	FRIRAAHRRTMRDQDTGKENEMDWDDSALTITVNPMETYEDQHSSEEEEE	EEEEEESEDGEEEDDITSAESESSEEEEGEQGDPQNATRQQQLEWDDSTL	HHHHHHHHHHHHHTTS	GGG
O95072	O95072_p_1_1	7	298	304	R	O95072_1	24	278	301	0.476	0.476	RRRRRRR		50.87,50.85,52.91,53.67,54.74,55.01,60.39	53.67	ELRLPAPPSPERRPPVPPPPRRRR		40.69,40.17,36.9,44.52,38.89,46.97,48.8,43.61,43.96,44.25,37.37,38.94,47.32,58.07,59.13,59.71,62.13,63.62,57.35,54.25,50.87,50.85,52.91,53.67	48.06	GEALGPEELRLTGWEPGALLMEVTPPEELRLPAPPSPERRPPVPPPPRRR	RRRRLLFWDKETQISPEKFQEQLQTRAHCWECPMVQPPERTIRGPAELFR		S SS HHHHHHHHH TTS GGG HHHHHH
O95104	O95104_p_2_1	7	960	966	Q	O95104_6	269	879	1147	0.454	0.454	QQQQQQQ		34.91,39.37,38.81,37.15,39.43,39.74,36.87	38.81	RPMPPHMMHRGPPPGPGGFAMPPPHGMKGPFPPHGPFVRPGGMPGLGGPGPGPGGPEDRDGRQQPPQQPQQQPQPQAPQQPQQQQQQQPPPSQQPPPTQQQPQQFRNDNRQQFNSGRDQERFGRRSFGNRVENDRERYGNRNDDRDNSNRDRREWGRRSPDRDRHRDLEERNRRSSGHRDRERDSRDRESRREKEEARGKEKPEVTDRAGGNKTVEPPISQVGNVDTASELEKGVSEAAVLKPSEELPAEATSSVEPEKDSGSAAEAPR	B B S SS S TTSHHHHHHHHHHHTTS S SSSSSSSSSSS S	41.3,44.49,38.9,49.79,49.35,38.97,40.75,37.85,39.45,31.38,36.02,35.22,48.4,42.67,38.76,48.86,34.81,36.98,35.7,38.12,39.56,43.24,48.38,47.35,33.09,32.97,41.78,31.83,38.72,48.76,43.37,47.24,52.33,39.97,34.31,42.77,32.42,37.7,42.71,40.41,35.89,36.82,41.61,41.89,39.25,35.65,32.88,35.92,41.36,36.16,42.82,37.01,43.71,34.74,38.94,45.7,37.79,42.06,39.69,36.37,37.36,37.47,35.37,39.1,47.53,37.14,37.06,44.3…	37.01	GPFVRPGGMPGLGGPGPGPGGPEDRDGRQQPPQQPQQQPQPQAPQQPQQQ	QQQQPPPSQQPPPTQQQPQQFRNDNRQQFNSGRDQERFGRRSFGNRVEND	B B
O95153	O95153_p_1_1	13	1262	1274	E	O95153_5	229	1083	1311	0.659	0.659	EEEEEEEEEEEEE	S	42.46,39.0,37.03,34.62,34.1,32.99,33.09,30.83,32.51,31.89,31.49,32.58,36.96	33.09	LPARVSCPSPHPSPEARAPLASASPGPGDPSSPLQHPAPLGTQEPPGAPPASPSREMAKGSHEDPPAPCSQEEAGAAVLGTSEERTASTSTLGEKDPGPAAPSLAKQEAEWTAGEACPASSSTQGARAQQAPNTEMCQGGDPGSGLRPRAEKEDTAELGVHLVNSLVDHGRNSDLSDIQEEEEEEEEEEEEELGSRTCSFQKQVAGNSIRENGAKSQPDPFCETDSDEE	SS S HHH	35.04,34.88,30.52,33.85,35.42,30.46,32.03,33.53,32.1,34.57,34.48,38.41,32.83,48.71,32.55,34.56,33.5,32.6,43.98,34.86,31.01,32.28,33.13,36.8,40.34,34.19,39.53,28.37,37.27,32.6,26.96,35.33,35.04,28.88,26.3,29.12,31.26,40.5,34.62,29.24,34.8,28.4,28.27,26.59,35.75,37.79,28.27,30.78,38.39,38.26,31.97,34.16,40.46,31.18,34.07,32.03,31.64,37.5,27.94,31.98,31.99,31.49,34.06,28.8,40.02,36.75,33.58,35.84,26…	32.6	MCQGGDPGSGLRPRAEKEDTAELGVHLVNSLVDHGRNSDLSDIQEEEEEE	EEEEEEELGSRTCSFQKQVAGNSIRENGAKSQPDPFCETDSDEEILEQIL	SS	S HHHHHHHHH
O95153	O95153_p_2_1	8	1334	1341	E	O95153_6	150	1330	1479	0.603	0.603	EEEEEEEE		30.58,30.99,29.77,31.27,30.99,31.04,34.83,31.5	31.015	FSIPEEEEEEEEDEEEEKSGAGCSSRDPGPPEPALLGLGCDSGQPRRPGQCPLSPESSRAGDCLEDMPGLVGGSSRRRGGGSPEKPPSRRRPPDPREHCSRLLSNNGPQASGRLGPTRERGGLPVIEGPRTGLEASGRGRLGPSRRCSRG	SS	34.64,28.68,27.64,33.2,30.58,30.99,29.77,31.27,30.99,31.04,34.83,31.5,32.57,32.65,32.94,33.67,35.9,35.55,34.9,37.92,32.96,33.27,29.0,27.33,31.62,33.61,29.74,34.51,33.64,34.45,35.03,27.51,33.15,27.82,29.08,33.18,30.03,35.03,34.68,29.66,31.56,30.34,31.63,27.8,35.68,30.24,28.16,36.61,29.73,28.35,27.37,34.69,32.94,32.43,36.53,29.25,26.31,27.86,26.99,27.51,26.95,25.6,25.95,28.83,29.06,27.53,32.04,34.7…	31.625	GNSIRENGAKSQPDPFCETDSDEEILEQILELPLQQFCSKKLFSIPEEEE	EEEEDEEEEKSGAGCSSRDPGPPEPALLGLGCDSGQPRRPGQCPLSPESS	HHHHHHHHHS SS
O95180	O95180_p_1_1	9	520	528	H	O95180_2	82	490	571	0.588	0.588	HHHHHHHHH		27.36,28.15,33.03,27.18,27.61,28.69,31.29,35.5,27.06	28.15	VDPSAVQGQGPGHRQRRAGRHTASVHHLVYHHHHHHHHHYHFSHGSPRRPGPEPGACDTRLVRAGAPPSPPSPGRGPPDAES	S SS	33.52,32.49,36.68,29.08,28.74,28.04,26.39,27.81,27.77,29.74,34.96,26.77,28.43,25.85,27.63,28.12,29.51,28.81,26.63,25.45,29.37,33.17,34.62,25.35,30.04,35.06,28.34,31.48,30.16,26.72,27.36,28.15,33.03,27.18,27.61,28.69,31.29,35.5,27.06,29.41,30.18,28.1,28.67,33.05,30.63,30.17,37.97,34.75,33.11,34.18,34.32,34.77,30.69,35.15,30.67,28.29,28.19,26.57,30.37,28.28,26.82,30.47,26.16,27.93,32.54,30.02,42.35…	30.1	RSLRLYARWQSRWRKKVDPSAVQGQGPGHRQRRAGRHTASVHHLVYHHHH	HHHHHYHFSHGSPRRPGPEPGACDTRLVRAGAPPSPPSPGRGPPDAESVH	HHHHHHHHHHHHTT S SS
O95196	O95196_p_1_1	7	277	283	E	O95196_4	93	262	354	0.648	0.648	EEEEEEE		44.6,52.47,50.46,42.53,49.39,48.83,49.64	49.39	ESDFYPTTSFYDDLDEEEEEEEDDKDAVGGGDLEDENELLVPTGKPGLGPGTGQPTSRWHAVPPQHTLGSVPGSSIALRPRPGEPGRDLASSE	TT S TT TTS S	53.24,59.96,54.15,50.78,52.76,48.48,44.84,43.15,43.63,47.03,48.22,47.01,45.21,49.26,52.85,44.6,52.47,50.46,42.53,49.39,48.83,49.64,47.96,49.93,60.69,47.92,50.45,49.3,47.98,42.7,46.18,43.54,59.74,52.27,53.01,57.91,49.64,44.22,46.29,44.52,43.56,43.08,39.81,47.19,44.8,42.27,37.98,43.32,37.63,39.77,35.72,45.82,31.94,32.8,39.62,37.78,36.0,30.4,35.74,40.11,36.69,37.03,40.39,37.29,37.19,38.01,31.69,34.5…	43.56	GSPGTSENHPDTEGETPSWSLLDLYDDFTPFDESDFYPTTSFYDDLDEEE	EEEEDDKDAVGGGDLEDENELLVPTGKPGLGPGTGQPTSRWHAVPPQHTL	TTTTS TT S
O95218	O95218_p_1_1	6	275	280	S	O95218_1	214	117	330	0.38	0.38	SSSSSS		42.31,41.46,42.74,43.37,42.48,48.68	42.61	REESDGEYDEFGRKKKKYRGKAVGPASILKEVEDKESEGEEEDEDEDLSKYKLDEDEDEDDADLSKYNLDASEEEDSNKKKSNRRSRSKSRSSHSRSSSRSSSPSSSRSRSRSRSRSSSSSQSRSRSSSRERSRSRGSKSRSSSRSHRGSSSPRKRSYSSSSSSPERNRKRSRSRSSSSGDRKKRRTRSRSPERRHRSSSGSSHSGSRSSSKKK	GGGB TTS B GGGS TT GGG S	63.96,61.43,56.28,56.63,58.78,62.35,64.54,70.41,76.74,75.35,69.1,66.68,69.62,66.95,68.21,65.5,65.25,57.53,57.53,54.87,50.32,44.2,51.83,42.99,42.96,43.27,46.81,42.29,43.6,48.46,47.47,49.81,45.44,45.17,49.34,38.46,38.18,36.02,38.4,41.57,45.05,45.43,43.63,55.31,52.73,49.11,53.2,56.23,58.01,59.03,56.78,55.47,53.79,58.77,55.24,60.53,58.39,61.07,61.24,58.0,59.88,62.27,60.7,63.27,64.36,65.84,66.2,58.27,…	46.835	RSRSRSSSSSQSRSRSSSRERSRSRGSKSRSSSRSHRGSSSPRKRSYSSS	SSSPERNRKRSRSRSSSSGDRKKRRTRSRSPERRHRSSSGSSHSGSRSSS
O95271	O95271_p_1_1	6	9	14	H	O95271_1	91	1	91	0.679	0.679	HHHHHH		29.7,29.25,25.83,28.57,26.33,28.65	28.61	MAASRRSQHHHHHHQQQLQPAPGASAPPPPPPPPLSPGLAPGTTPASPTASGLAPFASPRHGLALPEGDGSRDPPDRPRSPDPVDGTSCCS		29.55,28.29,30.79,30.12,31.1,27.28,29.09,26.63,29.7,29.25,25.83,28.57,26.33,28.65,25.5,28.22,25.82,29.44,26.49,30.17,29.78,36.39,32.06,33.08,32.28,33.09,34.35,35.21,34.23,31.19,34.08,33.99,30.89,31.76,32.81,29.52,30.89,30.23,27.72,24.91,29.63,26.87,23.86,25.06,28.05,25.26,23.66,29.33,25.9,27.83,26.99,26.09,29.09,24.38,33.03,25.91,26.41,26.34,34.66,28.01,27.0,25.94,27.12,25.65,27.82,39.76,24.18,27…	28.65	|||||||||||||||||||||||||||||||||||||||MAASRRSQHHH	HHHQQQLQPAPGASAPPPPPPPPLSPGLAPGTTPASPTASGLAPFASPRH	|||||||||||||||||||||||||||||||||||||||
O95271	O95271_p_2_1	8	27	34	P	O95271_1	91	1	91	0.679	0.679	PPPPPPPP		34.35,35.21,34.23,31.19,34.08,33.99,30.89,31.76	34.035	MAASRRSQHHHHHHQQQLQPAPGASAPPPPPPPPLSPGLAPGTTPASPTASGLAPFASPRHGLALPEGDGSRDPPDRPRSPDPVDGTSCCS		29.55,28.29,30.79,30.12,31.1,27.28,29.09,26.63,29.7,29.25,25.83,28.57,26.33,28.65,25.5,28.22,25.82,29.44,26.49,30.17,29.78,36.39,32.06,33.08,32.28,33.09,34.35,35.21,34.23,31.19,34.08,33.99,30.89,31.76,32.81,29.52,30.89,30.23,27.72,24.91,29.63,26.87,23.86,25.06,28.05,25.26,23.66,29.33,25.9,27.83,26.99,26.09,29.09,24.38,33.03,25.91,26.41,26.34,34.66,28.01,27.0,25.94,27.12,25.65,27.82,39.76,24.18,27…	28.65	||||||||||||||||||||MAASRRSQHHHHHHQQQLQPAPGASAPPPP	PPPPLSPGLAPGTTPASPTASGLAPFASPRHGLALPEGDGSRDPPDRPRS	||||||||||||||||||||
O95271	O95271_p_3_1	6	137	142	S	O95271_2	62	112	173	0.809	0.809	SSSSSS		26.45,25.61,29.3,24.8,28.51,25.23	26.03	SAAGVAPNPAGSGSNNSPSSSSSPTSSSSSSPSSPGSSLAESPEAAGVSSTAPLGPGAAGPG		27.72,28.62,28.89,26.1,31.68,29.05,33.31,31.05,41.31,31.18,29.86,26.86,27.75,26.05,26.88,24.84,28.96,36.87,24.77,24.99,24.91,26.2,28.59,42.41,25.43,26.45,25.61,29.3,24.8,28.51,25.23,33.88,26.48,27.16,32.35,26.72,28.08,27.73,26.77,26.08,23.37,25.33,36.62,23.41,27.18,23.28,23.69,23.5,26.59,26.06,23.22,26.98,34.05,29.24,27.85,35.52,28.55,26.63,23.94,26.84,30.53,27.07	27.025	CSTTSTICTVAAAPVVPAVSTSSAAGVAPNPAGSGSNNSPSSSSSPTSSS	SSSPSSPGSSLAESPEAAGVSSTAPLGPGAAGPGTGVPAVSGALRELLEA		SHHHHHHHHHHH
O95376	O95376_p_1_1	8	22	29	E	O95376_1	38	1	38	0.417	0.417	EEEEEEEE		35.79,35.41,36.14,34.3,33.49,34.53,31.6,32.75	34.415	MSVDMNSQGSDSNEEDYDPNCEEEEEEEEDDPGDIEDY	HHHH	39.85,33.77,34.68,28.55,35.83,27.21,31.73,29.34,27.91,36.99,26.34,34.0,34.88,29.27,36.79,35.13,26.59,39.54,40.41,32.87,27.38,35.79,35.41,36.14,34.3,33.49,34.53,31.6,32.75,36.67,36.01,36.31,37.63,45.37,44.97,49.71,53.75,52.33	35.005	|||||||||||||||||||||||||MSVDMNSQGSDSNEEDYDPNCEEEE	EEEEDDPGDIEDYYVGVASDVEQQGADAFDPEEYQFTCLTYKESEGALNE	|||||||||||||||||||||||||	HHHHHHTSSSS TT TT EEEE HHHHHHHHHH
O95391	O95391_p_1_1	10	498	507	K	O95391_3	94	493	586	0.425	0.425	KKKKKKKKKK	HHHHHHHHTS	58.48,52.92,48.74,49.31,50.92,46.23,45.5,44.32,39.4,32.76	47.485	KLKEEKKKKKKKKKKHRKSSSDSDDEEKKHEKLKKALNAEEARLLHVKETMQIDERKRPYNSMYETREPTEEEMEAYRMKRQRPDDPMASFLGQ	HHHHHHHHHHHHHTS THHHHHHHHHHHHHHHHHHHHHHHHHHHHHHS GGGS TTTT S HHHHHHHHHH TT TTHHHHT	73.18,70.5,67.26,62.54,61.49,58.48,52.92,48.74,49.31,50.92,46.23,45.5,44.32,39.4,32.76,30.49,32.49,29.02,27.4,28.57,34.78,47.57,47.54,53.02,70.1,69.27,75.57,78.65,78.61,78.44,85.87,87.57,86.59,88.56,90.16,89.78,89.36,90.49,88.23,85.07,87.45,88.58,84.78,86.12,86.88,84.0,84.46,84.71,85.16,82.24,81.29,84.1,82.25,83.3,78.35,81.42,80.84,83.22,79.78,73.13,69.37,70.06,64.46,62.98,59.63,65.18,74.66,74.47…	75.465	SYCTGEAGKEIVNSEECIINEITGEESVKKPQTLMELHQEKLKEEKKKKK	KKKKKHRKSSSDSDDEEKKHEKLKKALNAEEARLLHVKETMQIDERKRPY	HHHHHHHHHHHHHHHHHHTS HHHHHHHHHHHHHHHHH	HHHTS THHHHHHHHHHHHHHHHHHHHHHHHHHHHHHS GGGS T
O95409	O95409_p_5_1	6	496	501	G	O95409_2	58	475	532	0.771	0.771	GGGGGG		39.88,38.42,38.14,39.22,40.39,34.62	38.82	HRGGGSGSGGAGGGSGGGSGSGGGGGGAGGGGGGSSGGGSGTAGGHSGLSSNFNEWYV		40.75,38.43,39.25,38.66,40.12,41.97,43.99,46.84,42.9,44.0,49.27,44.84,44.29,44.2,43.8,44.41,41.15,40.46,40.37,40.61,42.91,39.88,38.42,38.14,39.22,40.39,34.62,42.5,38.51,38.22,37.84,39.73,38.36,39.31,41.08,44.34,40.23,38.32,36.0,41.6,37.58,44.42,36.97,38.93,38.15,41.93,40.47,32.66,37.5,31.6,32.94,34.96,33.48,36.94,32.75,35.24,34.85,38.27	39.52	SSSNLSPAAAAAAAAAAAAAAAVSAVHRGGGSGSGGAGGGSGGGSGSGGG	GGGAGGGGGGSSGGGSGTAGGHSGLSSNFNEWYV||||||||||||||||		||||||||||||||||
O95409	O95409_p_6_1	6	503	508	G	O95409_2	58	475	532	0.771	0.771	GGGGGG		38.51,38.22,37.84,39.73,38.36,39.31	38.435	HRGGGSGSGGAGGGSGGGSGSGGGGGGAGGGGGGSSGGGSGTAGGHSGLSSNFNEWYV		40.75,38.43,39.25,38.66,40.12,41.97,43.99,46.84,42.9,44.0,49.27,44.84,44.29,44.2,43.8,44.41,41.15,40.46,40.37,40.61,42.91,39.88,38.42,38.14,39.22,40.39,34.62,42.5,38.51,38.22,37.84,39.73,38.36,39.31,41.08,44.34,40.23,38.32,36.0,41.6,37.58,44.42,36.97,38.93,38.15,41.93,40.47,32.66,37.5,31.6,32.94,34.96,33.48,36.94,32.75,35.24,34.85,38.27	39.52	AAAAAAAAAAAAAAAVSAVHRGGGSGSGGAGGGSGGGSGSGGGGGGAGGG	GGGSSGGGSGTAGGHSGLSSNFNEWYV|||||||||||||||||||||||		|||||||||||||||||||||||
O95456	O95456_p_1_1	6	21	26	E	O95456_1	23	13	35	0.291	0.291	EEEEEE	TTSTT	49.84,47.77,45.38,46.61,48.65,43.14	47.19	PCRAGTEDEEEEEEGRRETPEDR	S TTSTT HHHH	59.74,55.1,63.52,56.92,44.85,45.44,47.14,45.84,49.84,47.77,45.38,46.61,48.65,43.14,50.69,58.23,62.86,73.81,83.25,87.75,85.83,87.39,87.54	55.1	|||||||||||||||||||||||||||MAATFFGEVVKAPCRAGTEDEEE	EEEGRRETPEDREVRLQLARKREVRLLRRQTKTSLEVSLLEKYPCSKFII	||||||||||||||||||||||||||| EE TT EE S TTS	TT HHHHHHHHHHHHHT EEEETTTTEE SS HHHHS SEEEE
O95466	O95466_p_1_1	6	542	547	P	O95466_4	126	510	635	0.694	0.694	PPPPPP		48.05,53.48,53.34,57.36,57.46,44.32	53.41	TPSGGDAPTPGVPTGSPSPDLAPAAEPAPGAAPPPPPPLPGLPSPQEAPPSAPPQAPPLPGSPEPPPAPPLPGDLPPPPPPPPPPPGTDGPVPPPPPPPPPPPGGPPDALGRRDSELGPGVKAKKP	SS	33.83,34.73,31.34,36.05,33.76,37.19,34.83,35.65,31.37,36.37,33.94,30.21,35.37,32.23,35.91,37.39,41.97,38.95,38.23,37.64,37.13,33.36,37.52,30.99,35.54,36.56,37.55,43.12,35.37,34.03,38.94,42.99,48.05,53.48,53.34,57.36,57.46,44.32,47.46,46.82,34.82,38.14,37.7,32.08,44.5,31.39,35.56,42.34,43.47,42.02,45.65,46.92,44.31,52.78,40.29,38.94,54.9,45.05,41.78,46.52,42.59,38.79,53.69,41.67,57.2,64.16,51.11,5…	43.855	PGDAVSIEILPVAVATPSGGDAPTPGVPTGSPSPDLAPAAEPAPGAAPPP	PPPLPGLPSPQEAPPSAPPQAPPLPGSPEPPPAPPLPGDLPPPPPPPPPP	SSS EEEEE
O95466	O95466_p_2_1	11	585	595	P	O95466_4	126	510	635	0.694	0.694	PPPPPPPPPPP		61.34,66.74,64.09,69.97,69.06,63.97,69.29,68.77,67.69,65.32,63.36	66.74	TPSGGDAPTPGVPTGSPSPDLAPAAEPAPGAAPPPPPPLPGLPSPQEAPPSAPPQAPPLPGSPEPPPAPPLPGDLPPPPPPPPPPPGTDGPVPPPPPPPPPPPGGPPDALGRRDSELGPGVKAKKP	SS	33.83,34.73,31.34,36.05,33.76,37.19,34.83,35.65,31.37,36.37,33.94,30.21,35.37,32.23,35.91,37.39,41.97,38.95,38.23,37.64,37.13,33.36,37.52,30.99,35.54,36.56,37.55,43.12,35.37,34.03,38.94,42.99,48.05,53.48,53.34,57.36,57.46,44.32,47.46,46.82,34.82,38.14,37.7,32.08,44.5,31.39,35.56,42.34,43.47,42.02,45.65,46.92,44.31,52.78,40.29,38.94,54.9,45.05,41.78,46.52,42.59,38.79,53.69,41.67,57.2,64.16,51.11,5…	43.855	AAPPPPPPLPGLPSPQEAPPSAPPQAPPLPGSPEPPPAPPLPGDLPPPPP	PPPPPPGTDGPVPPPPPPPPPPPGGPPDALGRRDSELGPGVKAKKPIQTK		SS S
O95466	O95466_p_3_1	11	602	612	P	O95466_4	126	510	635	0.694	0.694	PPPPPPPPPPP		64.73,64.01,61.42,63.45,64.52,56.52,63.23,62.35,50.33,61.68,48.85	62.35	TPSGGDAPTPGVPTGSPSPDLAPAAEPAPGAAPPPPPPLPGLPSPQEAPPSAPPQAPPLPGSPEPPPAPPLPGDLPPPPPPPPPPPGTDGPVPPPPPPPPPPPGGPPDALGRRDSELGPGVKAKKP	SS	33.83,34.73,31.34,36.05,33.76,37.19,34.83,35.65,31.37,36.37,33.94,30.21,35.37,32.23,35.91,37.39,41.97,38.95,38.23,37.64,37.13,33.36,37.52,30.99,35.54,36.56,37.55,43.12,35.37,34.03,38.94,42.99,48.05,53.48,53.34,57.36,57.46,44.32,47.46,46.82,34.82,38.14,37.7,32.08,44.5,31.39,35.56,42.34,43.47,42.02,45.65,46.92,44.31,52.78,40.29,38.94,54.9,45.05,41.78,46.52,42.59,38.79,53.69,41.67,57.2,64.16,51.11,5…	43.855	APPSAPPQAPPLPGSPEPPPAPPLPGDLPPPPPPPPPPPGTDGPVPPPPP	PPPPPPGGPPDALGRRDSELGPGVKAKKPIQTKFRMPLLNWVALKPSQIT		SS SS HHHHT
O95487	O95487_p_1_1	6	379	384	E	O95487_4	90	362	451	0.692	0.692	EEEEEE		42.8,36.52,40.01,37.06,41.54,37.22	38.615	NNQASSAPTPLSSTSDDEEEEEEDEEAGVDSSSTTSSASPMPNSYDALEGGSYPDMLSSSASSPAPDPAPEPDPASAPAPASAPAPVVPQ		30.48,33.39,35.29,34.33,34.06,37.67,37.89,41.81,35.07,41.48,35.49,35.11,38.82,36.93,41.32,39.16,41.27,42.8,36.52,40.01,37.06,41.54,37.22,40.71,39.81,36.43,41.2,34.98,39.96,31.43,36.7,30.99,36.4,32.32,38.08,32.42,35.09,32.11,32.0,34.52,30.04,34.49,33.95,31.71,33.38,34.33,37.43,38.31,38.29,36.51,36.38,33.19,39.97,42.42,34.52,38.2,39.67,37.96,40.24,40.01,40.5,42.1,41.72,49.54,44.29,54.81,47.01,55.36…	39.415	TANHPVEPVTSVTQPSELLQQKGVQYGEYVNNQASSAPTPLSSTSDDEEE	EEEDEEAGVDSSSTTSSASPMPNSYDALEGGSYPDMLSSSASSPAPDPAP
O95785	O95785_p_1_1	10	567	576	E	O95785_3	33	546	578	0.415	0.415	EEEEEEEEEE	S S	25.79,35.45,32.64,34.63,35.4,33.14,33.79,36.64,37.81,35.86	35.015	LGRNKSTVHPQGLGERRRPWSEEEEEEEEEEDV	SS S SS S	34.45,36.17,37.94,36.39,38.58,33.31,35.32,34.47,35.73,35.66,32.28,33.53,29.76,30.15,28.9,31.51,23.59,30.09,31.7,30.57,24.52,25.79,35.45,32.64,34.63,35.4,33.14,33.79,36.64,37.81,35.86,36.7,36.27	34.45	GTGQRPLGRLAFPSTLASTPYSLQLGRNKSTVHPQGLGERRRPWSEEEEE	EEEEEDVVLTSEMDFSPENGVFSPLATPSLIPQAALELKQAFREALQAVE	SS S SS S	HHHHHHHHHHHHHHHHS
O95817	O95817_p_1_1	6	155	160	A	O95817_2	78	123	200	0.704	0.704	AAAAAA		38.93,38.28,36.27,39.26,38.23,40.0	38.605	RTEAAAAAPQRSQSPLRGMPETTQPDKQCGQVAAAAAAQPPASHGPERSQSPAASDCSSSSSSASLPSSGRSSLGSHQ		44.81,49.26,40.19,41.01,40.17,39.6,42.75,43.7,41.49,41.18,32.03,40.97,43.86,37.23,44.46,43.1,41.86,42.57,41.03,50.03,40.79,45.87,45.42,42.79,50.06,45.63,53.95,45.97,39.08,42.89,39.48,38.89,38.93,38.28,36.27,39.26,38.23,40.0,40.91,57.67,58.14,41.81,50.82,45.59,46.04,57.28,44.38,42.86,45.95,42.22,40.43,51.23,44.94,40.43,54.37,40.61,39.99,39.94,42.72,42.43,40.78,46.21,38.1,44.91,38.71,44.65,41.87,34…	42.325	VHPFHVYPQPGMQRFRTEAAAAAPQRSQSPLRGMPETTQPDKQCGQVAAA	AAAQPPASHGPERSQSPAASDCSSSSSSASLPSSGRSSLGSHQLPRGYIS		TT
O95817	O95817_p_2_1	6	180	185	S	O95817_2	78	123	200	0.704	0.704	SSSSSS		39.94,42.72,42.43,40.78,46.21,38.1	41.605	RTEAAAAAPQRSQSPLRGMPETTQPDKQCGQVAAAAAAQPPASHGPERSQSPAASDCSSSSSSASLPSSGRSSLGSHQ		44.81,49.26,40.19,41.01,40.17,39.6,42.75,43.7,41.49,41.18,32.03,40.97,43.86,37.23,44.46,43.1,41.86,42.57,41.03,50.03,40.79,45.87,45.42,42.79,50.06,45.63,53.95,45.97,39.08,42.89,39.48,38.89,38.93,38.28,36.27,39.26,38.23,40.0,40.91,57.67,58.14,41.81,50.82,45.59,46.04,57.28,44.38,42.86,45.95,42.22,40.43,51.23,44.94,40.43,54.37,40.61,39.99,39.94,42.72,42.43,40.78,46.21,38.1,44.91,38.71,44.65,41.87,34…	42.325	RSQSPLRGMPETTQPDKQCGQVAAAAAAQPPASHGPERSQSPAASDCSSS	SSSASLPSSGRSSLGSHQLPRGYISIPVIHEQNVTRPAAQPSFHQAQKTH		TT
O95819	O95819_p_1_1	6	327	332	E	O95819_1	44	306	349	0.455	0.455	EEEEEE		36.14,31.88,40.14,34.28,35.82,33.69	35.05	IDRTRKKRGEKDETEYEYSGSEEEEEEVPEQEGEPSSIVNVPGE	HHHHHHHHHHHHSSS	91.6,91.67,90.25,84.66,83.04,81.01,75.85,67.97,56.62,41.01,43.5,41.88,37.2,36.08,34.93,32.94,34.33,31.75,36.0,34.35,33.66,36.14,31.88,40.14,34.28,35.82,33.69,39.58,39.72,36.94,37.25,37.53,36.04,39.32,40.16,34.91,35.15,33.96,34.56,35.28,39.03,43.63,34.67,35.83	37.07	TEQLLKHPFIRDQPNERQVRIQLKDHIDRTRKKRGEKDETEYEYSGSEEE	EEEVPEQEGEPSSIVNVPGESTLRRDFLRLQQENKERSEALRRQQLLQEQ	HHHHTTSHHHH TTHHHHHHHHHHHHHHHHHHHHHHHSSS	HHHHHHHHHHHHHHHHHHHHHHHHHHHHH
O95886	O95886_p_1_1	12	223	234	H	O95886_4	110	182	291	0.505	0.505	HHHHHHHHHHHH		47.12,46.91,46.07,46.37,43.57,43.93,43.07,47.47,44.93,46.43,46.0,45.36	46.035	AKSHSLEAPGKRDYNGPKAEGRGGSGGDSYPGPGSGGPHTSHHHHHHHHHHHHQSRHGKRSKSKDRKGDGRHQAKSTGWWSSDDNLDSDSGFLAGGRPPGEPGGPFCLEG	HHHTTS	75.91,71.15,65.45,57.17,54.52,53.19,47.07,40.38,42.76,41.99,41.26,38.69,39.65,45.78,38.34,32.29,51.94,35.3,41.88,37.89,42.31,40.69,41.15,44.25,44.33,43.51,44.2,44.76,46.23,52.23,54.78,45.06,48.51,44.01,46.73,41.45,40.27,47.78,44.65,44.03,45.8,47.12,46.91,46.07,46.37,43.57,43.93,43.07,47.47,44.93,46.43,46.0,45.36,44.9,44.02,44.88,48.37,43.6,44.87,43.62,48.47,37.06,49.87,45.49,41.36,43.86,36.43,37.…	42.915	KLFAKSHSLEAPGKRDYNGPKAEGRGGSGGDSYPGPGSGGPHTSHHHHHH	HHHHHHQSRHGKRSKSKDRKGDGRHQAKSTGWWSSDDNLDSDSGFLAGGR	HHHHHHTTS
O95948	O95948_p_1_1	14	41	54	G	O95948_1	67	29	95	0.769	0.769	GGGGGGGGGGGGGG		45.67,46.07,46.32,47.41,46.84,47.97,47.56,48.06,46.7,47.38,47.22,45.91,43.86,47.23	47.03	LGTLHGPAGGGSGGGGGGGGGGGGGGPGHEQELLASPSPHHAGRGAAGSLRGPPPPPTAHQELGTAA	TTH	38.0,40.95,37.96,43.03,43.33,37.75,48.42,43.8,43.16,42.36,44.4,48.22,45.67,46.07,46.32,47.41,46.84,47.97,47.56,48.06,46.7,47.38,47.22,45.91,43.86,47.23,55.73,49.08,46.53,43.31,42.74,41.62,42.84,50.67,47.32,38.83,47.28,39.34,56.91,39.71,44.64,42.61,39.2,42.16,35.66,44.84,42.51,42.54,45.44,43.28,49.02,60.84,71.21,64.7,71.13,70.89,65.86,45.42,51.21,44.12,41.82,38.44,43.61,42.1,38.15,43.41,42.71	44.64	|||MKAAYTAYRCLTKDLEGCAMNPELTMESLGTLHGPAGGGSGGGGGGG	GGGGGGGPGHEQELLASPSPHHAGRGAAGSLRGPPPPPTAHQELGTAAAA	||| THHHHHHHHTTSTT	TTHHH
O95948	O95948_p_3_1	8	177	184	H	O95948_2	24	166	189	0.331	0.331	HHHHHHHH		43.38,40.74,41.35,39.89,39.4,45.1,36.55,46.29	41.045	KFHHPHPHHHPHHHHHHHHQRLSG		44.47,41.56,43.06,38.64,44.77,43.88,46.69,45.23,43.09,47.04,42.59,43.38,40.74,41.35,39.89,39.4,45.1,36.55,46.29,37.42,42.21,37.8,42.94,42.99	42.965	MSMSCDSSPPGMGMSNTYTTLTPLQPLPPISTVSDKFHHPHPHHHPHHHH	HHHHQRLSGNVSGSFTLMRDERGLPAMNNLYSPYKEMPGMSQSLSPLAAT
O95983	O95983_p_1_1	7	275	281	E	O95983_1	38	254	291	0.46	0.46	EEEEEEE		50.87,44.66,47.74,46.78,48.38,50.1,54.12	48.38	LARDGEAPLDKACAEDDDEEDEEEEEEEPDPDPEMEHV	HHHHTT	90.74,90.12,84.01,74.94,64.08,52.94,45.97,48.0,47.67,45.26,44.64,41.85,38.47,43.48,45.06,47.83,43.23,46.16,49.19,44.97,45.52,50.87,44.66,47.74,46.78,48.38,50.1,54.12,63.23,61.51,63.19,58.74,63.84,53.87,54.4,50.92,51.21,47.45	48.785	QEELVQQVRKRLEEALMADMLAHVEELARDGEAPLDKACAEDDDEEDEEE	EEEEPDPDPEMEHV||||||||||||||||||||||||||||||||||||	HHHHHHHHHHHHHHHHHHHHHHHHHHHHHHTT	||||||||||||||||||||||||||||||||||||
O96004	O96004_p_2_1	6	64	69	A	O96004_1	57	53	109	0.649	0.649	AAAAAA		41.08,45.99,42.24,39.92,38.6,40.87	40.975	APDFPAGGPPPAAAAAATAYGPDARPGQSPGRLEALGGRLGRRKGSGPKKERRRTES	SSSSSSSS S SHHHHHHHHHHH	45.74,50.04,43.49,50.15,43.08,44.03,36.51,45.01,56.67,63.95,50.9,41.08,45.99,42.24,39.92,38.6,40.87,42.03,50.66,48.97,40.22,53.84,42.64,50.39,51.71,44.43,41.08,48.05,44.18,44.14,41.12,46.63,45.56,45.05,47.45,52.12,45.99,48.07,55.24,54.48,48.91,56.94,57.99,59.13,55.91,60.82,69.28,79.83,85.03,87.98,89.49,94.15,91.96,94.53,96.13,96.77,96.69	48.97	HPAHPMLHEPFLFGPASRCHQERPYFQSWLLSPADAAPDFPAGGPPPAAA	AAATAYGPDARPGQSPGRLEALGGRLGRRKGSGPKKERRRTESINSAFAE	SS TTSTTTS GGG	SSSSSSSS S SHHHHHHHHHHHHHHHHHH
O96013	O96013_p_1_1	6	242	247	S	O96013_1	207	95	301	0.622	0.622	SSSSSS		40.97,39.08,40.19,39.36,37.59,41.5	39.775	TRSNSLRRDSPPPPARARQENGMPEEPATTARGGPGKAGSRGRFAGHSEAGGGSGDRRRAGPEKRPKSSREGSGGPQESSRDKRPLSGPDVGTPQPAGLASGAKLAAGRPFNTYPRADTDHPSRGAQGEPHDVAPNGPSAGGLAIPQSSSSSSRPPTRARGAPSPGVLGPHASEPQLAPPACTPAAPAVPGPPGPRSPQREPQRVSH	GGG SS H	31.06,31.97,35.04,32.53,35.86,31.95,30.5,30.9,27.97,28.41,29.28,28.83,33.51,32.36,34.18,37.79,33.93,36.64,32.05,37.76,32.64,33.52,39.13,36.19,35.89,44.38,41.72,35.3,40.97,39.74,40.64,39.67,36.99,37.23,38.97,39.72,40.67,40.54,38.2,42.08,41.0,40.02,41.32,41.31,40.69,40.02,42.1,36.26,36.59,36.63,37.62,34.78,42.8,38.64,40.3,42.38,40.22,38.36,40.65,39.93,38.33,51.29,40.87,41.3,38.16,43.25,36.66,44.39,…	38.97	SGAKLAAGRPFNTYPRADTDHPSRGAQGEPHDVAPNGPSAGGLAIPQSSS	SSSRPPTRARGAPSPGVLGPHASEPQLAPPACTPAAPAVPGPPGPRSPQR
P02810	P02810_p_1_1	6	138	143	P	P02810_1	152	15	166	0.471	0.471	PPPPPP	S	85.11,86.88,88.62,91.21,91.65,91.92	89.915	SAQDLDEDVSQEDVPLVISDGGDSEQFIDEERQGPPLGGQQSQPSAGDGNQDDGPQQGPPQQGGQQQQGPPPPQGKPQGPPQQGGHPPPPQGRPQGPPQQGGHPRPPRGRPQGPPQQGGHQQGPPPPPPGKPQGPPPQGGRPQGPPQGQSPQ	HHHTTSSSS S S S S	64.51,59.08,58.3,54.15,51.76,50.67,53.46,50.61,45.77,44.29,45.59,40.97,41.76,40.76,43.29,43.32,40.76,43.72,44.68,41.8,33.65,34.76,41.41,50.17,47.34,44.62,40.11,46.78,44.43,46.3,42.55,44.19,45.14,43.65,49.09,49.98,49.89,38.05,39.17,45.1,45.21,48.7,52.34,58.21,51.47,50.97,43.57,46.4,46.68,47.36,54.75,53.42,54.63,55.12,56.86,57.94,62.5,62.54,67.35,65.58,66.48,64.55,55.42,61.61,61.01,64.92,68.06,74.6…	68.305	PQGPPQQGGHPPPPQGRPQGPPQQGGHPRPPRGRPQGPPQQGGHQQGPPP	PPPGKPQGPPPQGGRPQGPPQGQSPQ||||||||||||||||||||||||	S	||||||||||||||||||||||||
P02814	P02814_p_1_1	7	47	53	P	P02814_1	61	19	79	0.67	0.67	PPPPPPP	S	76.28,78.43,79.85,79.05,75.74,74.41,69.81	76.28	PGESQRGPRGPYPPGPLAPPQPFGPGFVPPPPPPPYGPGRIPPPPPAPYGPGIFPPPPPQP	SSTT S TT SS TT SS TT	56.7,54.6,56.37,56.22,54.67,54.27,53.49,55.84,55.05,55.17,59.73,48.9,56.26,60.12,57.88,62.63,65.78,66.4,66.26,67.29,69.07,63.18,71.14,64.39,65.04,68.75,75.62,76.35,76.28,78.43,79.85,79.05,75.74,74.41,69.81,66.89,62.29,63.7,66.62,65.93,73.01,72.56,74.04,74.73,77.24,75.59,72.78,68.42,68.63,58.78,58.21,64.4,66.48,70.84,72.09,76.55,77.83,81.12,79.12,79.46,78.7	66.89	|MKSLTWILGLWALAACFTPGESQRGPRGPYPPGPLAPPQPFGPGFVPPP	PPPPYGPGRIPPPPPAPYGPGIFPPPPPQP||||||||||||||||||||	| HHHHHHHHHHHHHHHT SSTT S TT	SS TT SS TT ||||||||||||||||||||
P04264	P04264_p_1_1	6	519	524	G	P04264_2	35	489	523	0.781	0.781	GGGGGG		37.26,36.23,34.86,35.37,33.15,35.91	35.64	EESRMSGECAPNVSVSVSTSHTTISGGGSRGGGGG	HHHHHS	72.03,70.0,62.03,63.99,59.55,57.46,52.11,40.78,39.37,46.07,44.2,41.97,38.04,44.03,38.17,45.78,38.4,43.91,40.38,39.37,35.17,37.78,35.08,39.48,37.12,35.82,37.44,37.47,42.68,43.95,37.26,36.23,34.86,35.37,33.15	39.48	KLALDLEIATYRTLLEGEESRMSGECAPNVSVSVSTSHTTISGGGSRGGG	GGGYGSGGSSYGSGGGSYGSGGGGGGGRGSYGSGGSSYGSGGGSYGSGGG	HHHHHHHHHHHHHHHHHHHHHHS
P04264	P04264_p_3_1	6	569	574	G	P04264_3	77	568	644	0.759	0.759	GGGGGG		32.48,30.53,33.6,33.42,32.88,32.24	32.68	SGGGGGGHGSYGSGSSSGGYRGGSGGGGGGSSGGRGSGGGSSGGSIGGRGSSSGGVKSSGGSSSVKFVSTTYSGVTR		38.22,32.48,30.53,33.6,33.42,32.88,32.24,28.76,33.17,31.12,31.16,33.41,33.75,34.13,36.29,35.68,37.67,36.24,34.31,37.26,39.89,35.68,35.57,42.15,36.79,35.58,36.54,35.85,35.91,36.64,41.12,41.94,36.94,38.16,37.52,38.16,40.48,35.96,36.54,36.18,38.24,41.48,38.01,36.04,32.48,34.43,35.95,34.52,35.04,32.73,35.27,35.15,32.81,32.82,34.4,36.51,34.1,40.74,35.15,39.83,37.91,35.53,43.11,35.44,38.45,33.72,39.0,4…	36.04	GGGYGSGGSSYGSGGGSYGSGGGGGGGRGSYGSGGSSYGSGGGSYGSGGG	GGGHGSYGSGSSSGGYRGGSGGGGGGSSGGRGSGGGSSGGSIGGRGSSSG
P04264	P04264_p_4_1	6	592	597	G	P04264_3	77	568	644	0.759	0.759	GGGGGG		36.79,35.58,36.54,35.85,35.91,36.64	36.225	SGGGGGGHGSYGSGSSSGGYRGGSGGGGGGSSGGRGSGGGSSGGSIGGRGSSSGGVKSSGGSSSVKFVSTTYSGVTR		38.22,32.48,30.53,33.6,33.42,32.88,32.24,28.76,33.17,31.12,31.16,33.41,33.75,34.13,36.29,35.68,37.67,36.24,34.31,37.26,39.89,35.68,35.57,42.15,36.79,35.58,36.54,35.85,35.91,36.64,41.12,41.94,36.94,38.16,37.52,38.16,40.48,35.96,36.54,36.18,38.24,41.48,38.01,36.04,32.48,34.43,35.95,34.52,35.04,32.73,35.27,35.15,32.81,32.82,34.4,36.51,34.1,40.74,35.15,39.83,37.91,35.53,43.11,35.44,38.45,33.72,39.0,4…	36.04	GGGGRGSYGSGGSSYGSGGGSYGSGGGGGGHGSYGSGSSSGGYRGGSGGG	GGGSSGGRGSGGGSSGGSIGGRGSSSGGVKSSGGSSSVKFVSTTYSGVTR
P04553	P04553_p_1_1	6	23	28	R	P04553_1	30	1	30	0.33	0.33	RRRRRR	HHHHHH	58.22,58.92,58.33,57.66,58.36,57.25	58.275	MARYRCCRSQSRSRYYRQRQRSRRRRRRSC	GGGGHHHHHHHHHHHHHHHHHHH	41.63,48.56,50.18,52.27,52.5,49.99,51.09,49.54,53.42,53.5,57.15,53.71,60.35,55.25,56.2,55.38,56.34,59.11,57.88,59.56,60.17,59.61,58.22,58.92,58.33,57.66,58.36,57.25,58.8,56.9	56.62	|||||||||||||||||||||||||MARYRCCRSQSRSRYYRQRQRSRRR	RRRSCQTRRRAMRCCRPRYRPRCRRH||||||||||||||||||||||||	||||||||||||||||||||||||| GGGGHHHHHHHHHHHHHH	HHHHHHHHHHHHHHSS ||||||||||||||||||||||||
P05067	P05067_p_1_1	7	274	280	T	P05067_1	91	194	284	0.573	0.573	TTTTTTT	H	35.6,35.02,42.91,32.26,38.24,45.35,49.73	38.24	DNVDSADAEEDDSDVWWGGADTDYADGSEDKVVEVAEEEEVAEVEEEEADDDEDDEDGDEVEEEAEEPYEEATERTTSIATTTTTTTESVE	TT GGGS HHHHH	37.77,36.92,40.51,36.04,40.79,38.02,40.59,44.64,46.74,35.44,40.35,36.8,41.61,34.84,42.24,42.78,40.41,35.09,30.65,29.32,33.74,35.34,35.82,45.97,36.27,34.47,33.08,34.19,33.8,34.5,34.12,34.92,30.47,35.23,34.58,33.34,35.62,31.36,38.75,33.58,38.92,38.06,35.34,39.02,36.78,39.37,38.65,37.33,38.41,37.34,39.97,44.24,44.45,41.01,44.71,44.18,41.81,41.17,43.72,36.97,46.03,35.73,38.76,37.63,34.19,39.27,37.73,…	37.77	EVAEEEEVAEVEEEEADDDEDDEDGDEVEEEAEEPYEEATERTTSIATTT	TTTTESVEEVVREVCSEQAETGPCRAMISRWYFDVTEGKCAPFFYGGCGG		HHHHHHHHHHHTTS S EEEEEEETTTTEEEEEEE SS
P05976	P05976_p_1_1	6	12	17	A	P05976_1	35	1	35	0.82	0.82	AAAAAA		53.73,51.64,53.26,51.22,53.14,58.17	53.2	MAPKKDVKKPVAAAAAAPAPAPAPAPAPAPAKPKE		49.6,51.7,50.85,55.39,53.78,58.92,58.4,55.93,57.9,53.17,54.71,53.73,51.64,53.26,51.22,53.14,58.17,62.92,64.5,67.28,68.43,67.92,65.67,67.24,66.99,64.04,67.23,61.76,59.15,56.42,53.05,50.49,49.35,49.83,55.14	55.93	||||||||||||||||||||||||||||||||||||MAPKKDVKKPVAAA	AAAPAPAPAPAPAPAPAKPKEEKIDLSAIKIEFSKEQQDEFKEAFLLFDR	||||||||||||||||||||||||||||||||||||	GGG HHHHHHHHHHHHHT S
P06400	P06400_p_1_1	6	13	18	A	P06400_1	42	1	42	0.622	0.622	AAAAAA		34.41,35.72,36.81,37.13,38.5,38.91	36.97	MPPKTPRKTAATAAAAAAEPPAPPPPPPPEEDPEQDSGPEDL		35.84,41.39,38.77,37.98,39.83,41.48,35.03,37.14,36.79,34.48,35.27,35.41,34.41,35.72,36.81,37.13,38.5,38.91,37.84,46.69,49.14,47.71,51.83,54.71,54.0,54.11,52.5,50.39,43.89,40.3,38.55,39.53,40.53,37.85,35.1,37.38,34.73,32.68,34.12,33.2,31.64,29.3	37.915	|||||||||||||||||||||||||||||||||||MPPKTPRKTAATAAA	AAAEPPAPPPPPPPEEDPEQDSGPEDLPLVRLEFEETEEPDFTALCQKLK	|||||||||||||||||||||||||||||||||||	SHHHHS HHHHHHHHHTT
P06400	P06400_p_2_1	7	23	29	P	P06400_1	42	1	42	0.622	0.622	PPPPPPP		51.83,54.71,54.0,54.11,52.5,50.39,43.89	52.5	MPPKTPRKTAATAAAAAAEPPAPPPPPPPEEDPEQDSGPEDL		35.84,41.39,38.77,37.98,39.83,41.48,35.03,37.14,36.79,34.48,35.27,35.41,34.41,35.72,36.81,37.13,38.5,38.91,37.84,46.69,49.14,47.71,51.83,54.71,54.0,54.11,52.5,50.39,43.89,40.3,38.55,39.53,40.53,37.85,35.1,37.38,34.73,32.68,34.12,33.2,31.64,29.3	37.915	|||||||||||||||||||||||||MPPKTPRKTAATAAAAAAEPPAPPP	PPPPEEDPEQDSGPEDLPLVRLEFEETEEPDFTALCQKLKIPDHVRERAW	|||||||||||||||||||||||||	SHHHHS HHHHHHHHHTT HHHHHHHH
P06454	P06454_p_1_1	8	62	69	E	P06454_1	111	1	111	0.419	0.419	EEEEEEEE		54.19,56.5,58.82,54.37,61.17,52.47,64.16,59.01	57.66	MSDAAVDTSSEITTKDLKEKKEVVEEAENGRDAPANGNAENEENGEQEADNEVDEEEEEGGEEEEEEEEGDGEEEDGDEDEEAESATGKRAAEDDEDDDVDTKKQKTDEDD	TTSS TTHHHHTTTGGGSSSTTS S S S	48.89,56.9,60.02,55.34,66.82,62.99,54.67,60.3,61.22,59.0,59.54,61.28,62.69,63.84,62.56,62.39,57.04,61.18,54.77,58.56,59.74,54.62,59.85,62.36,56.23,54.3,57.7,55.23,57.57,55.96,61.0,58.78,63.86,58.14,65.4,51.81,48.82,53.31,56.09,56.86,58.14,52.72,55.89,55.78,49.54,54.6,52.01,57.69,64.55,56.86,56.2,64.31,65.01,66.69,55.95,56.27,53.58,55.76,57.43,56.65,59.45,54.19,56.5,58.82,54.37,61.17,52.47,64.16,5…	58.56	DLKEKKEVVEEAENGRDAPANGNAENEENGEQEADNEVDEEEEEGGEEEE	EEEEGDGEEEDGDEDEEAESATGKRAAEDDEDDDVDTKKQKTDEDD||||	HHHHTTTGGGSSSTTS S S	S ||||
P06748	P06748_p_1_1	6	163	168	D	P06748_1	128	120	247	0.459	0.459	DDDDDD		53.42,56.37,55.75,58.39,58.51,61.44	57.38	EEDAESEDEEEEDVKLLSISGKRSAPGGGSKVPQKKVKLAADEDDDDDDEEDDDEDDDDDDFDDEEAEEKAPVKKSIRDTPAKNAQKSNQNGKDSKPSSTPRSKGQESFKKQEKTPKTPKGPSSVEDI	S SSSSSSTTSS SS HHHH	65.38,55.32,50.99,52.81,48.77,49.36,46.45,49.98,49.12,50.11,49.68,48.44,48.02,50.43,51.19,44.23,46.63,44.92,44.73,51.39,47.53,47.54,45.26,42.52,46.88,45.65,46.75,48.45,46.18,52.15,52.21,54.77,48.8,44.66,50.2,46.34,49.74,45.58,41.49,41.2,40.43,53.66,48.46,53.42,56.37,55.75,58.39,58.51,61.44,59.15,51.99,61.43,53.4,60.58,49.35,60.05,55.44,57.16,53.68,60.62,57.2,58.51,62.23,52.02,58.21,47.03,49.43,45…	48.455	LVAVEEDAESEDEEEEDVKLLSISGKRSAPGGGSKVPQKKVKLAADEDDD	DDDEEDDDEDDDDDDFDDEEAEEKAPVKKSIRDTPAKNAQKSNQNGKDSK	EE S SSSSSSTTSS
P06748	P06748_p_2_1	6	175	180	D	P06748_1	128	120	247	0.459	0.459	DDDDDD		60.05,55.44,57.16,53.68,60.62,57.2	57.18	EEDAESEDEEEEDVKLLSISGKRSAPGGGSKVPQKKVKLAADEDDDDDDEEDDDEDDDDDDFDDEEAEEKAPVKKSIRDTPAKNAQKSNQNGKDSKPSSTPRSKGQESFKKQEKTPKTPKGPSSVEDI	S SSSSSSTTSS SS HHHH	65.38,55.32,50.99,52.81,48.77,49.36,46.45,49.98,49.12,50.11,49.68,48.44,48.02,50.43,51.19,44.23,46.63,44.92,44.73,51.39,47.53,47.54,45.26,42.52,46.88,45.65,46.75,48.45,46.18,52.15,52.21,54.77,48.8,44.66,50.2,46.34,49.74,45.58,41.49,41.2,40.43,53.66,48.46,53.42,56.37,55.75,58.39,58.51,61.44,59.15,51.99,61.43,53.4,60.58,49.35,60.05,55.44,57.16,53.68,60.62,57.2,58.51,62.23,52.02,58.21,47.03,49.43,45…	48.455	EEEEDVKLLSISGKRSAPGGGSKVPQKKVKLAADEDDDDDDEEDDDEDDD	DDDFDDEEAEEKAPVKKSIRDTPAKNAQKSNQNGKDSKPSSTPRSKGQES	SSSTTSS
P07197	P07197_p_1_1	6	534	539	E	P07197_2	367	485	851	0.496	0.496	EEEEEE		32.69,33.01,28.58,35.83,33.12,30.21	32.85	KEEKKEAAEEKEEEPEAEEEEVAAKKSPVKATAPEVKEEEGEKEEEEGQEEEEEEDEGAKSDQAEEGGSEKEGSSEKEEGEQEEGETEAEAEGEEAEAKEEKKVEEKSEEVATKEELVADAKVEKPEKAKSPVPKSPVEEKGKSPVPKSPVEEKGKSPVPKSPVEEKGKSPVPKSPVEEKGKSPVSKSPVEEKAKSPVPKSPVEEAKSKAEVGKGEQKEEEEKEVKEAPKEEKVEKKEEKPKDVPEKKKAESPVKEEAVAEVVTITKSVKVHLEKETKEEGKPLQQEKEKEKAGGEGGSEEEGSDKGAKGSRKEDIAVNGEVEGKEEVEQETKEKGSGREEEKGVVTNGLDLSPADEKKGGDKSEEK	HHHHHHHHHTT S	77.27,70.63,66.52,70.52,63.05,55.6,56.71,56.39,51.56,49.84,49.68,42.14,39.68,36.82,36.52,38.16,34.53,31.32,36.73,33.25,27.86,35.53,31.4,37.39,37.14,32.68,29.18,36.54,30.65,28.93,27.8,33.67,29.19,38.42,27.41,26.67,32.24,27.03,33.33,30.42,31.81,30.97,35.7,32.58,30.83,34.93,32.29,33.24,27.88,32.69,33.01,28.58,35.83,33.12,30.21,33.57,32.08,32.45,29.86,35.38,28.52,33.2,28.36,34.37,27.92,36.07,29.35,31…	32.24	EKKEAAEEKEEEPEAEEEEVAAKKSPVKATAPEVKEEEGEKEEEEGQEEE	EEEDEGAKSDQAEEGGSEKEGSSEKEEGEQEEGETEAEAEGEEAEAKEEK	HHHHHHHTT S
P07199	P07199_p_1_1	14	406	419	E	P07199_2	89	387	475	0.422	0.422	EEEEEEEEEEEEEE		32.63,32.0,32.67,33.94,31.8,32.21,33.55,34.28,34.72,35.91,36.89,35.36,32.97,36.16	33.745	AGFGGGPNATITTSLKSEGEEEEEEEEEEEEEEGEGEEEEEEGEEEEEEGGEGEELGEEEEVEEEGDVDSDEEEEEDEESSSEGLEAED	TT STT B	85.17,82.88,82.2,65.29,58.39,55.73,58.17,56.84,66.29,68.96,63.62,57.03,52.65,44.26,38.13,31.87,33.58,34.01,31.08,32.63,32.0,32.67,33.94,31.8,32.21,33.55,34.28,34.72,35.91,36.89,35.36,32.97,36.16,33.25,36.16,32.08,36.37,31.86,35.69,32.35,29.99,33.67,31.94,34.92,32.92,40.12,33.19,33.51,36.92,31.91,35.67,34.91,29.04,36.34,28.87,36.63,35.94,31.31,37.68,33.82,34.0,35.35,35.14,36.6,34.07,37.79,37.17,35…	34.51	EALHFVAAAWQAVEPSDIAACFREAGFGGGPNATITTSLKSEGEEEEEEE	EEEEEEEGEGEEEEEEGEEEEEEGGEGEELGEEEEVEEEGDVDSDEEEEE	HHHHHHHHHHHTS HHHHHHHHHHTT STT B
P07199	P07199_p_2_1	6	423	428	E	P07199_2	89	387	475	0.422	0.422	EEEEEE		36.37,31.86,35.69,32.35,29.99,33.67	33.01	AGFGGGPNATITTSLKSEGEEEEEEEEEEEEEEGEGEEEEEEGEEEEEEGGEGEELGEEEEVEEEGDVDSDEEEEEDEESSSEGLEAED	TT STT B	85.17,82.88,82.2,65.29,58.39,55.73,58.17,56.84,66.29,68.96,63.62,57.03,52.65,44.26,38.13,31.87,33.58,34.01,31.08,32.63,32.0,32.67,33.94,31.8,32.21,33.55,34.28,34.72,35.91,36.89,35.36,32.97,36.16,33.25,36.16,32.08,36.37,31.86,35.69,32.35,29.99,33.67,31.94,34.92,32.92,40.12,33.19,33.51,36.92,31.91,35.67,34.91,29.04,36.34,28.87,36.63,35.94,31.31,37.68,33.82,34.0,35.35,35.14,36.6,34.07,37.79,37.17,35…	34.51	EPSDIAACFREAGFGGGPNATITTSLKSEGEEEEEEEEEEEEEEGEGEEE	EEEGEEEEEEGGEGEELGEEEEVEEEGDVDSDEEEEEDEESSSEGLEAED	HHHHHHHHHHTT STT B
P07199	P07199_p_3_1	6	430	435	E	P07199_2	89	387	475	0.422	0.422	EEEEEE		34.92,32.92,40.12,33.19,33.51,36.92	34.215	AGFGGGPNATITTSLKSEGEEEEEEEEEEEEEEGEGEEEEEEGEEEEEEGGEGEELGEEEEVEEEGDVDSDEEEEEDEESSSEGLEAED	TT STT B	85.17,82.88,82.2,65.29,58.39,55.73,58.17,56.84,66.29,68.96,63.62,57.03,52.65,44.26,38.13,31.87,33.58,34.01,31.08,32.63,32.0,32.67,33.94,31.8,32.21,33.55,34.28,34.72,35.91,36.89,35.36,32.97,36.16,33.25,36.16,32.08,36.37,31.86,35.69,32.35,29.99,33.67,31.94,34.92,32.92,40.12,33.19,33.51,36.92,31.91,35.67,34.91,29.04,36.34,28.87,36.63,35.94,31.31,37.68,33.82,34.0,35.35,35.14,36.6,34.07,37.79,37.17,35…	34.51	CFREAGFGGGPNATITTSLKSEGEEEEEEEEEEEEEEGEGEEEEEEGEEE	EEEGGEGEELGEEEEVEEEGDVDSDEEEEEDEESSSEGLEAEDWAQGVVE	HHHHTT STT B
P07900	P07900_p_1_1	6	274	279	K	P07900_1	54	225	278	0.222	0.222	KKKKKK	EE	37.27,44.44,46.51,53.28,63.14,67.84	49.895	ERDKEVSDDEAEEKEDKEEEKEKEEKESEDKPEIEDVGSDEEEEKKDGDKKKKK	EEEEEE HHHHHHHHHHHHHHHHHHHTTS E	83.54,83.18,82.49,77.19,72.83,67.51,68.21,63.67,67.04,61.4,58.3,63.14,67.28,63.23,66.0,67.07,69.19,62.05,58.7,62.94,60.67,54.09,56.03,52.99,50.14,50.15,49.72,48.72,38.88,35.6,42.88,37.54,35.5,42.6,32.69,40.65,35.86,36.76,33.54,35.28,36.39,33.7,35.04,34.35,34.62,34.32,33.47,33.87,34.3,37.27,44.44,46.51,53.28,63.14	50.145	DKEVSDDEAEEKEDKEEEKEKEEKESEDKPEIEDVGSDEEEEKKDGDKKK	KKKIKEKYIDQEELNKTKPIWTRNPDDITNEEYGEFYKSLTNDWEDHLAV	EEEE HHHHHHHHHHHHHHHHHHHTTS	EEEEEEEEEEEES GGGS GGG HHHHHHHHHHHH SS SEE
P07919	P07919_p_1_1	9	17	25	E	P07919_1	30	1	30	0.556	0.556	EEEEEEEEE	HHHHHHHHH	76.3,74.64,71.71,74.16,74.41,77.34,77.62,78.65,79.44	76.3	MGLEDEQKMLTESGDPEEEEEEEEELVDPL	HHHHHHHTTSS HHHHHHHHHH HH	49.99,59.42,60.05,59.99,61.35,58.28,56.19,55.73,53.81,54.53,56.47,56.88,58.17,63.33,73.02,74.77,76.3,74.64,71.71,74.16,74.41,77.34,77.62,78.65,79.44,83.4,87.64,90.07,92.97,94.61	72.365	||||||||||||||||||||||||||||||MGLEDEQKMLTESGDPEEEE	EEEEELVDPLTTVREQCEQLEKCVKARERLELCDERVSSRSHTEEDCTEE	|||||||||||||||||||||||||||||| HHHHHHHTTSS HHHHH	HHHHH HHHHHHHHHHTSHHHHHHHHHHHHHHHHHHT SS SHHH
P08151	P08151_p_1_1	6	543	548	S	P08151_2	65	516	580	0.79	0.79	SSSSSS		33.81,35.08,35.09,33.44,34.46,32.74	34.135	GLKLPSLSHTGTTVSRRVGPPVSLERRSSSSSSISSAYTVSRRSSLASPFPPGSPPENGASSLPG	TT	35.61,40.46,34.81,35.68,34.35,32.43,36.78,27.41,33.65,30.81,33.11,31.17,28.7,36.79,31.36,34.75,32.43,32.51,31.59,45.93,36.64,33.18,32.53,34.76,33.49,34.69,34.9,33.81,35.08,35.09,33.44,34.46,32.74,37.35,32.4,33.68,34.65,35.29,34.62,35.83,31.04,33.01,30.72,30.72,30.78,33.92,32.78,33.1,37.37,34.12,46.21,39.47,33.15,33.18,39.09,33.04,38.1,34.24,30.34,35.52,32.67,33.03,40.12,41.11,56.37	33.92	RRLENLRLDQLHQLRPIGTRGLKLPSLSHTGTTVSRRVGPPVSLERRSSS	SSSISSAYTVSRRSSLASPFPPGSPPENGASSLPGLMPAQHYLLRARYAS	SSS	TT HHHHHHHHHHHHH
P08235	P08235_p_1_1	8	694	701	P	P08235_3	27	684	710	0.416	0.416	PPPPPPPP		41.99,44.96,50.01,57.47,57.62,49.65,54.51,53.5	51.755	IHEEQPQQQQPPPPPPPPQSPEEGTTY		33.94,37.86,35.32,31.8,35.0,31.66,36.94,36.78,35.11,35.78,41.99,44.96,50.01,57.47,57.62,49.65,54.51,53.5,42.53,49.7,46.23,44.96,43.11,39.85,43.39,42.3,36.44	42.3	DKIRRKNCPACRLQKCLQAGMNLGARKSKKLGKLKGIHEEQPQQQQPPPP	PPPPQSPEEGTTYIAPAKEPSVNTALVPQLSTISRALTPSPVMVLENIEP	STTGGGT HHHHHHHHHHTT GGGGG S	TTHHHHTTTS HHHHHHHT
P08588	P08588_p_1_1	6	429	434	D	P08588_2	75	403	477	0.738	0.738	DDDDDD		41.05,46.27,45.61,43.86,47.58,39.8	44.735	ATHGDRPRASGCLARPGPPPSPGAASDDDDDDVVGATPPARLLEPWAGCNGGAAADSDSSLDEPCRPGFASESKV	HHHH	73.0,61.66,61.15,58.3,52.15,41.51,49.22,42.23,40.92,44.1,40.58,42.21,41.15,42.44,40.87,42.45,50.12,47.73,49.1,58.74,52.48,44.88,44.59,43.64,42.56,43.92,41.05,46.27,45.61,43.86,47.58,39.8,46.35,43.31,37.43,41.04,41.84,41.5,53.3,38.99,31.94,34.94,33.32,31.27,35.23,34.5,36.47,31.58,30.69,33.91,36.63,31.25,35.39,34.64,37.46,37.7,37.41,36.7,37.62,36.45,40.13,35.54,35.46,36.79,34.44,34.14,35.86,35.49,3…	40.87	DFRKAFQRLLCCARRAARRRHATHGDRPRASGCLARPGPPPSPGAASDDD	DDDVVGATPPARLLEPWAGCNGGAAADSDSSLDEPCRPGFASESKV||||	HHHHHHHHHHHHHHHHHHHHHHHHH	||||
P08779	P08779_p_1_1	7	446	452	S	P08779_1	46	428	473	0.652	0.652	SSSSSSS		35.09,36.95,35.6,37.72,40.44,37.24,39.94	37.24	LSSQQASGQSYSSREVFTSSSSSSSRQTRPILKEQSSSSFSQGQSS	HHHHHHTT	55.83,55.72,55.05,51.68,49.07,48.27,47.98,41.16,38.64,34.45,38.71,37.83,34.48,38.05,35.57,38.78,35.95,35.25,35.09,36.95,35.6,37.72,40.44,37.24,39.94,39.21,38.54,38.18,38.97,42.29,39.46,37.59,38.97,36.16,37.85,39.06,40.75,41.64,39.0,40.28,41.63,40.42,42.88,42.34,38.04,41.26	38.985	EYQILLDVKTRLEQEIATYRRLLEGEDAHLSSQQASGQSYSSREVFTSSS	SSSSRQTRPILKEQSSSSFSQGQSS|||||||||||||||||||||||||	HHHHHHHHHHHHHHHHHHHHHHHHHHHHHHHHHHHTT	|||||||||||||||||||||||||
P09016	P09016_p_1_1	9	222	230	S	P09016_2	44	212	255	0.67	0.67	SSSSSSSSS		45.37,54.21,50.75,51.03,47.26,46.68,43.69,50.07,42.73	47.26	DHKLPNTKGRSSSSSSSSSCSSSVAPSQHLQPMAKDHHTDLTTL	HTT SS	91.55,86.48,67.48,61.91,60.99,53.49,57.6,53.91,42.97,52.74,45.37,54.21,50.75,51.03,47.26,46.68,43.69,50.07,42.73,36.37,50.24,48.85,51.91,58.15,59.01,49.66,54.03,53.44,52.9,45.92,54.17,46.26,54.51,59.49,51.65,60.88,53.4,58.08,56.26,65.84,49.48,68.47,63.76,59.89	53.465	NRYLTRRRRIEIAHTLCLSERQIKIWFQNRRMKWKKDHKLPNTKGRSSSS	SSSSSCSSSVAPSQHLQPMAKDHHTDLTTL||||||||||||||||||||	SS HHHHHHHHHHHT HHHHHHHHHHHHHHHHHHTT SS	||||||||||||||||||||
P09086	P09086_p_1_1	8	417	424	G	P09086_5	71	409	479	0.77	0.77	GGGGGGGG		40.85,39.8,38.34,37.49,37.43,39.79,40.87,39.58	39.685	TLHPSRTAGGGGGGGGAAPPLNSIPSVTPPPPATTNSTNPSPQGSHSAIGLSGLNPSTGPGLWWNPAPYQP		41.68,44.98,38.75,52.54,42.62,40.58,44.91,42.41,40.85,39.8,38.34,37.49,37.43,39.79,40.87,39.58,43.5,51.43,61.23,54.63,45.46,53.52,43.79,53.0,48.85,39.52,50.53,47.22,69.62,64.96,52.78,68.21,47.62,37.24,48.96,36.85,39.76,41.86,39.33,50.45,41.11,51.93,42.89,42.94,44.07,45.22,42.82,42.19,45.09,40.68,43.01,42.22,36.49,42.42,41.02,50.52,37.61,39.74,38.66,40.34,41.29,43.18,34.82,37.03,44.83,57.34,56.62,…	42.94	ASYSPHMVTPQGGAGTLPLSQASSSLSTTVTTLSSAVGTLHPSRTAGGGG	GGGGAAPPLNSIPSVTPPPPATTNSTNPSPQGSHSAIGLSGLNPSTGPGL
P09529	P09529_p_1_1	7	39	45	P	P09529_1	37	26	62	0.71	0.71	PPPPPPP	S	64.91,63.2,65.12,63.34,57.16,53.17,41.53	63.2	AWGSPTPPPTPAAPPPPPPPGSPGGSQDTCTSCGGFR	S TTSTT	43.55,42.17,41.05,50.91,46.53,56.0,61.27,63.83,62.45,58.39,57.21,51.6,57.64,64.91,63.2,65.12,63.34,57.16,53.17,41.53,34.06,35.18,38.55,31.06,30.78,41.76,40.67,43.37,40.57,47.29,53.63,50.38,59.78,35.86,40.1,42.77,43.08	47.29	|||||||||MDGLPGRALGAACLLLLAAGWLGPEAWGSPTPPPTPAAPPP	PPPPGSPGGSQDTCTSCGGFRRPEELGRVDGDFLEAVKRHILSRLQMRGR	|||||||||	S TTSTT TT HHHHHHHHHHHHHHHT SS
P09629	P09629_p_1_1	6	212	217	E	P09629_1	24	194	217	0.389	0.389	EEEEEE	SS	54.79,53.27,48.44,42.65,42.77,38.51	45.605	KENKTAGPGTTGQDRAEAEEEEEE	HHTTTS TTS SSSSS	94.31,92.42,87.09,73.59,66.91,62.44,58.12,54.12,52.4,50.87,48.9,42.67,52.32,52.28,56.14,51.09,56.16,53.99,54.79,53.27,48.44,42.65,42.77,38.51	53.63	RRRIEIAHTLCLTERQIKIWFQNRRMKWKKENKTAGPGTTGQDRAEAEEE	EEE|||||||||||||||||||||||||||||||||||||||||||||||	HHHHHHHHHHT HHHHHHHHHHHHHHHHHHTTTS TTS SSSSS	|||||||||||||||||||||||||||||||||||||||||||||||
P09651	P09651_p_1_1	6	360	365	S	P09651_2	55	318	372	0.608	0.608	SSSSSS		47.87,43.93,48.33,51.21,48.88,52.67	48.605	YNNQSSNFGPMKGGNFGGRSSGPYGGGGQYFAKPRNQGGYGGSSSSSSYGSGRRF	SS	39.92,36.56,40.11,41.5,38.7,41.28,41.78,39.02,31.1,42.79,40.62,36.96,36.76,32.96,37.73,38.39,39.22,36.56,36.87,37.35,41.68,39.13,47.06,39.43,40.67,41.27,41.3,43.65,44.2,44.12,43.44,45.81,51.09,50.13,41.13,45.98,42.79,41.64,41.76,44.15,43.43,43.53,47.87,43.93,48.33,51.21,48.88,52.67,50.93,51.32,51.72,57.43,54.91,61.37,67.39	41.78	NDFGNYNNQSSNFGPMKGGNFGGRSSGPYGGGGQYFAKPRNQGGYGGSSS	SSSYGSGRRF||||||||||||||||||||||||||||||||||||||||	SS	||||||||||||||||||||||||||||||||||||||||
P0C2W7	P0C2W7_p_1_1	8	92	99	E	P0C2W7_1	102	1	102	0.684	0.684	EEEEEEEE	T	50.5,51.94,47.15,40.75,45.66,41.62,42.57,39.56	44.115	MSATGDRHPTQGDQEAPVSQEGAQAEAAGAGNQEGGDSGPDSSDMVPAAEVVGVAGPVEGLGEEEGEQAAGLAAVPQGGSAEEDSDIGPATEEEEEEEEGNE	TTSG	64.06,54.68,50.09,54.36,69.09,59.2,59.94,53.68,63.61,49.49,50.55,56.4,52.44,58.51,57.32,50.23,66.39,51.23,54.05,56.74,50.43,51.11,46.14,50.67,48.89,43.98,50.02,46.75,43.07,46.11,47.8,52.96,46.87,47.58,48.29,45.55,51.8,49.83,49.95,52.1,56.46,45.98,57.73,48.95,58.57,49.58,53.7,46.47,42.92,48.62,45.73,45.32,48.74,41.22,45.07,49.28,43.34,55.42,47.12,48.13,44.6,53.94,53.23,62.86,47.64,52.48,46.21,42.8…	49.89	VPAAEVVGVAGPVEGLGEEEGEQAAGLAAVPQGGSAEEDSDIGPATEEEE	EEEEGNEAANFDLAVATRRYPAAGIGFVFLYLVHSLLRRLYHNDHIQIAN		TTSGGG HHHHHHH GGGHHHHHHHHHHHHHHHHHHTT G
P0C5Y9	P0C5Y9_p_1_1	6	3	8	R	P0C5Y9_1	21	1	21	0.476	0.476	RRRRRR		61.36,61.52,63.24,56.84,59.85,56.57	60.605	MPRRRRRRGSSGAGGRGRTCS	S S	51.39,66.37,61.36,61.52,63.24,56.84,59.85,56.57,51.21,57.13,53.16,52.79,55.2,51.71,54.34,58.36,62.75,71.08,77.91,83.04,88.61	58.36	|||||||||||||||||||||||||||||||||||||||||||||MPRRR	RRRGSSGAGGRGRTCSRTVRAELSFSVSQVERSLREGHYAQRLSRTAPVY	|||||||||||||||||||||||||||||||||||||||||||||	S S HHHHTT SS HHHHHHHHHHTT SS TTHHHH
P0C5Z0	P0C5Z0_p_1_1	6	3	8	R	P0C5Z0_1	21	1	21	0.476	0.476	RRRRRR		61.91,62.87,63.94,57.71,59.97,57.35	60.94	MPRRRRRRGSSGAGGRGRTCS	S	51.0,68.38,61.91,62.87,63.94,57.71,59.97,57.35,50.71,57.32,52.37,53.9,55.1,52.53,55.32,59.32,63.62,73.32,79.95,84.72,88.73	59.32	|||||||||||||||||||||||||||||||||||||||||||||MPRRR	RRRGSSGAGGRGRTCSRTVRAELSFSVSQVERSLREGHYAQRLSRTAPVY	|||||||||||||||||||||||||||||||||||||||||||||	S HHHHTT SS HHHHHHHHHHTT SS TTHHHH
P0C7U0	P0C7U0_p_1_1	7	276	282	P	P0C7U0_1	33	259	291	0.63	0.63	PPPPPPP		58.07,61.75,66.33,63.43,61.31,61.25,50.83	61.31	VVGPPRPASGRSQPGRSPPPPPPPEPSDMPCAD		41.27,38.64,39.84,42.09,41.27,40.3,42.07,36.81,43.38,38.51,41.71,39.4,43.02,41.92,40.68,43.65,48.57,58.07,61.75,66.33,63.43,61.31,61.25,50.83,44.59,48.89,38.52,39.67,39.6,40.18,32.57,38.93,41.72	41.72	YYLLGQGRRGHRSILSKLQSVCTEDSYAAEVVGPPRPASGRSQPGRSPPP	PPPPEPSDMPCADDECFSGDGTTPLVALPTLATQAEARPLIKVKQLTQNS	BSS TTT BHHHHHHTT GGGSTTS	EEEEEEEETTE
P0C7U0	P0C7U0_p_2_1	6	721	726	P	P0C7U0_4	37	696	732	0.487	0.487	PPPPPP		55.01,52.29,46.11,55.3,46.96,38.97	49.625	KGRQYGEHRHSYPGSHPAEPPAPPGPPPPPPHEGLGR	HHHHHHH	48.57,39.58,38.64,36.7,36.85,35.52,32.82,31.52,27.52,30.37,26.13,29.88,30.55,28.93,31.06,32.05,36.72,31.42,35.77,41.08,39.2,50.13,44.45,46.16,59.39,55.01,52.29,46.11,55.3,46.96,38.97,44.27,36.21,38.7,38.76,37.64,36.78	37.64	SPAADAILTVTPAAAVLRAEAEKGRQYGEHRHSYPGSHPAEPPAPPGPPP	PPPHEGLGRKASILEPLTRPRPRDLAYSQLSPQYHSLSYSSSPEYTCRAS	HHHHHHHHHHHHHHHHHH
P0C7V8	P0C7V8_p_1_1	22	126	147	E	P0C7V8_2	57	107	163	0.24	0.24	EEEEEEEEEEEEEEEEEEEEEE	SHHHHHHHHHHHHHHHHHHHTT	36.3,36.91,40.63,40.87,39.8,43.86,49.79,45.4,44.95,44.38,46.4,43.16,44.58,45.09,44.29,42.01,42.84,44.07,40.1,42.07,44.49,38.61	43.51	GEEETEREEEDEEIQEEGGEEEEEEEEEEEEEEEEEEEEEEQPRAGPQGSGGNHEQY	T SSHHHHHHHHHHHHHHHHHHHTT TTHHHH	32.27,32.41,32.77,29.58,30.99,28.59,31.98,28.33,35.16,34.13,32.0,35.66,30.46,34.95,33.97,33.06,34.07,35.41,36.84,36.3,36.91,40.63,40.87,39.8,43.86,49.79,45.4,44.95,44.38,46.4,43.16,44.58,45.09,44.29,42.01,42.84,44.07,40.1,42.07,44.49,38.61,26.45,31.4,31.53,30.3,31.39,33.32,29.07,30.16,29.34,31.73,31.07,32.3,33.59,37.6,35.13,37.25	35.13	LEDFEHFLMSGESLFHYPLVGEEETEREEEDEEIQEEGGEEEEEEEEEEE	EEEEEEEEEEEQPRAGPQGSGGNHEQYSLEEDQALEEWVSSETSALPRPR	HHHHHHHHHS S TT SSHHHHHHHHHH	HHHHHHHHHTT TTHHHHHHHHHHHHHHHHHHHTS S
P0C7W0	P0C7W0_p_2_1	6	161	166	P	P0C7W0_1	38	152	189	0.756	0.756	PPPPPP	T	75.25,78.77,78.17,76.42,78.3,65.19	77.295	SREREVRAVPPPPPPSATGTVGADVPPASDYYDAESLL	TTTS TTS GGGG TTTT	52.54,48.07,53.76,52.8,52.19,61.44,59.61,68.51,77.06,75.25,78.77,78.17,76.42,78.3,65.19,59.49,55.9,56.55,60.42,58.99,63.73,59.93,65.56,61.03,62.2,65.64,68.79,62.05,62.71,62.56,58.53,59.34,58.66,61.12,59.5,58.58,59.63,52.88	60.725	PYLMPSPGALLPWPAPFFPTPACQPYLQDVPRIQHCPASREREVRAVPPP	PPPSATGTVGADVPPASDYYDAESLL||||||||||||||||||||||||	SS S	TTTS TTS GGGG TTTT ||||||||||||||||||||||||
P0CG42	P0CG42_p_1_1	12	74	85	Q	P0CG42_2	25	60	84	0.157	0.157	QQQQQQQQQQQQ	HHHHHHHHHHHH	79.21,78.25,77.66,79.16,78.98,76.83,77.85,78.41,76.97,75.61,77.7,77.49	77.775	QKPSEDIYKNRQRRQQQQQQQQQQQ	HHHHHHHHHHHHHHHHHHHHH	50.72,56.54,55.54,60.48,61.78,64.07,69.05,66.49,73.08,77.82,76.51,77.83,76.08,79.86,79.21,78.25,77.66,79.16,78.98,76.83,77.85,78.41,76.97,75.61,77.7	76.83	RQLLLGNSTMIRHTCPMSVPLSRQVKEVAAQKPSEDIYKNRQRRQQQQQQ	QQQQQQLDLLFHQRIQISLWPRKQKRRKTEQHSHPFVKKAFRFSAGPGCR	SSSSSS HHHHHHHHTT HHHHHHHHHHHHHHHH	HHHHHHHHHHHHHHHHHHHTTTTTSGGGTSS S SSSSS
P0CJ78	P0CJ78_p_1_1	25	93	117	S	P0CJ78_2	85	58	142	0.696	0.696	SSSSSSSSSSSSSSSSSSSSSSSSS		32.53,35.35,36.88,37.02,34.75,34.62,33.11,33.07,33.64,33.54,30.99,30.75,30.61,30.72,30.46,30.48,30.79,31.39,30.94,30.84,30.81,31.91,32.37,34.83,36.2	32.37	LPCAPGPPPQPPPQPPPPQYDYPPQSTFKPKAEVPSSSSSSSSSSSSSSSSSSSSSSSSSQAKKPDPPLPPAFGAPPPPLFDAAF		38.25,39.96,35.74,43.42,41.61,42.02,57.86,50.81,50.12,46.9,55.64,57.61,52.16,50.25,56.73,55.63,53.1,46.9,37.93,33.28,37.36,43.17,53.31,39.17,33.55,36.64,32.65,34.24,37.45,43.51,36.26,39.33,38.75,37.44,41.85,32.53,35.35,36.88,37.02,34.75,34.62,33.11,33.07,33.64,33.54,30.99,30.75,30.61,30.72,30.46,30.48,30.79,31.39,30.94,30.84,30.81,31.91,32.37,34.83,36.2,37.17,33.4,37.99,35.25,37.6,35.8,44.27,39.5…	37.02	VAALPCAPGPPPQPPPQPPPPQYDYPPQSTFKPKAEVPSSSSSSSSSSSS	SSSSSSSSSSSSSQAKKPDPPLPPAFGAPPPPLFDAAFPTPQWGIVDLSG	SSS
P0DME0	P0DME0_p_1_1	8	256	263	D	P0DME0_2	135	168	302	0.454	0.454	DDDDDDDD		49.81,49.06,52.81,55.86,56.94,57.55,59.81,58.18	56.4	LNESGDPSSKSTKIKWKSGKDVTKRSSQTQNKASRKRQHEEPESFFTWFTDHSDAGADELEEVIKDDIWPNPLQYYLVPDMDDEEGGEDDDDDDDDGDEGEEELEDIDEGDEDEGEEDEDDDEGEEGEEDEGEDD	E TTS EEEEE B TT GGGTHHHHT SS S GGGGGT TTTTS HHHHIIIIIITT THHHHTS TTGGGS	89.89,84.76,82.02,84.59,84.14,88.39,92.22,93.55,94.85,95.13,96.91,96.46,95.94,95.95,96.34,96.7,96.61,94.33,91.39,93.55,92.85,90.17,88.39,83.21,66.25,57.28,53.46,52.79,51.73,54.49,46.92,49.26,52.06,53.12,53.78,54.37,50.61,51.57,55.4,57.66,59.83,66.84,81.09,89.7,92.9,94.13,92.66,93.72,94.15,91.53,89.96,91.45,85.84,84.71,85.69,82.35,87.0,90.59,91.77,93.22,94.11,93.99,95.61,95.92,94.51,94.61,96.35,96…	61.34	ESFFTWFTDHSDAGADELEEVIKDDIWPNPLQYYLVPDMDDEEGGEDDDD	DDDDGDEGEEELEDIDEGDEDEGEEDEDDDEGEEGEEDEGEDD|||||||	GGGGGT TTTTS HHHHIIIIIITT THHHHTS TTGGGS	|||||||
P0DMR3	P0DMR3_p_1_1	6	35	40	E	P0DMR3_1	21	19	39	0.326	0.326	EEEEEE	TT	49.33,43.21,48.47,43.31,43.23,43.34	43.325	PFSGLKEEEEEDGEDDEEEEE	T	28.5,30.58,29.28,30.03,31.87,36.7,34.98,41.58,40.02,35.91,42.65,40.39,44.11,44.82,48.78,45.45,49.33,43.21,48.47,43.31,43.23	41.58	|||||||||||||MPCPGAPCCSLVATGSRVPFSGLKEEEEEDGEDDEEE	EEEGFFQKVLTPLLSWLLSRRLWLGPQCSKLPLPSCCRQPPPAGPPVEGD	|||||||||||||	TTSHHHHHHHHHHHHHHHS SS TTSS GGGS T
P0DPB3	P0DPB3_p_1_1	6	36	41	S	P0DPB3_1	74	1	74	0.671	0.671	SSSSSS		41.13,44.95,41.14,43.35,41.65,40.58	41.395	MERSGQRVTTWDCDQGKHSDSDYREDGMDLGSDAGSSSSSSRASSQSNSTKVTPCSECKSSSSPGGSLDLVSAL	TTGGG	37.05,40.42,40.68,56.14,49.09,56.5,51.52,49.5,51.21,50.21,46.7,50.3,43.36,49.44,44.33,40.62,43.32,43.71,44.42,39.19,48.6,42.3,50.97,49.62,50.36,58.35,49.06,60.48,58.65,65.34,46.69,48.78,47.33,45.94,43.87,41.13,44.95,41.14,43.35,41.65,40.58,46.74,42.3,48.37,46.9,50.34,45.99,51.98,48.2,50.18,48.18,52.71,48.61,41.93,41.04,50.56,37.11,38.33,37.29,35.04,38.35,40.39,37.92,48.47,33.34,36.86,34.66,43.17,…	46.72	||||||||||||MERSGQRVTTWDCDQGKHSDSDYREDGMDLGSDAGSSS	SSSRASSQSNSTKVTPCSECKSSSSPGGSLDLVSALEDYEEPFPVYQKKV	||||||||||||	TTGGGSS TTHHHHH
P0DPB3	P0DPB3_p_2_1	6	99	104	E	P0DPB3_2	134	88	221	0.595	0.595	EEEEEE		35.34,37.88,37.24,38.5,40.95,36.71	37.56	VIDEWAPEEDGEEEEEEDERDQRGYRDDRSPAREPGDVSARTRSGGGGGRSATTAMPPPVPNGNLHQHDPQDLRHNGNVVVAGRPSCSRGPRRAIQKPQPAGGRRSGRGPAAGGLCLQPPDGGTCVPEEPPVPP	HHHTTS	43.14,46.15,45.38,48.57,42.83,40.94,46.23,51.22,47.79,40.31,39.97,35.34,37.88,37.24,38.5,40.95,36.71,42.65,37.18,40.69,35.54,39.92,41.94,39.46,37.24,43.45,40.52,39.34,40.48,42.78,46.33,36.91,42.1,37.12,45.79,40.74,40.47,49.7,41.14,41.49,41.47,43.21,43.1,45.11,42.46,40.34,41.35,40.52,41.09,47.92,40.97,40.66,38.1,31.9,31.76,47.73,50.49,65.14,41.13,41.34,57.81,35.44,37.2,29.36,34.77,30.5,30.17,31.56…	41.375	VTPCSECKSSSSPGGSLDLVSALEDYEEPFPVYQKKVIDEWAPEEDGEEE	EEEDERDQRGYRDDRSPAREPGDVSARTRSGGGGGRSATTAMPPPVPNGN	TTGGGSS TTHHHHHHHTTS
P10275	P10275_p_1_1	23	58	80	Q	P10275_1	132	36	167	0.584	0.584	QQQQQQQQQQQQQQQQQQQQQQQ	HHHHHHHHHHHHHHHHHHHHHHH	80.46,83.45,81.94,83.17,85.08,86.38,83.78,85.67,86.86,85.87,84.56,85.54,86.46,83.63,84.17,84.06,82.66,79.53,79.15,77.64,71.11,63.44,60.29	83.63	NPGPRHPEAASAAPPGASLLLLQQQQQQQQQQQQQQQQQQQQQQQETSPRQQQQQQGEDGSPQAHRRGPTGYLVLDEEQQPSQPQSALECHPERGCVPEPGAAVAASKGLPQQLPAPPDEDDSAAPSTLSLL	S THHHHHHHHHHHHHHHHHHHHHHHHHHHHHHHHTTSSSSSS S S	48.14,48.31,42.56,40.55,38.97,35.85,40.24,32.57,31.88,37.04,38.73,31.93,39.73,43.02,42.99,46.83,52.96,53.97,64.71,71.37,71.73,72.31,80.46,83.45,81.94,83.17,85.08,86.38,83.78,85.67,86.86,85.87,84.56,85.54,86.46,83.63,84.17,84.06,82.66,79.53,79.15,77.64,71.11,63.44,60.29,58.43,51.53,42.89,44.5,41.65,42.63,40.76,38.81,40.78,38.43,37.09,33.92,36.02,37.8,36.17,35.09,45.86,33.34,32.85,32.31,29.24,28.32…	38.275	YRGAFQNLFQSVREVIQNPGPRHPEAASAAPPGASLLLLQQQQQQQQQQQ	QQQQQQQQQQQQETSPRQQQQQQGEDGSPQAHRRGPTGYLVLDEEQQPSQ	SSHHHHHHHHHHHHHH S THHHHHHHHHHHHHHHHHH	HHHHHHHHHHHHHHTTSSSSSS S S
P10275	P10275_p_2_1	6	86	91	Q	P10275_1	132	36	167	0.584	0.584	QQQQQQ	SSSSS	42.63,40.76,38.81,40.78,38.43,37.09	39.785	NPGPRHPEAASAAPPGASLLLLQQQQQQQQQQQQQQQQQQQQQQQETSPRQQQQQQGEDGSPQAHRRGPTGYLVLDEEQQPSQPQSALECHPERGCVPEPGAAVAASKGLPQQLPAPPDEDDSAAPSTLSLL	S THHHHHHHHHHHHHHHHHHHHHHHHHHHHHHHHTTSSSSSS S S	48.14,48.31,42.56,40.55,38.97,35.85,40.24,32.57,31.88,37.04,38.73,31.93,39.73,43.02,42.99,46.83,52.96,53.97,64.71,71.37,71.73,72.31,80.46,83.45,81.94,83.17,85.08,86.38,83.78,85.67,86.86,85.87,84.56,85.54,86.46,83.63,84.17,84.06,82.66,79.53,79.15,77.64,71.11,63.44,60.29,58.43,51.53,42.89,44.5,41.65,42.63,40.76,38.81,40.78,38.43,37.09,33.92,36.02,37.8,36.17,35.09,45.86,33.34,32.85,32.31,29.24,28.32…	38.275	PRHPEAASAAPPGASLLLLQQQQQQQQQQQQQQQQQQQQQQQETSPRQQQ	QQQGEDGSPQAHRRGPTGYLVLDEEQQPSQPQSALECHPERGCVPEPGAA	S THHHHHHHHHHHHHHHHHHHHHHHHHHHHHHHHTTSSSS	SS S S
P10323	P10323_p_1_1	8	350	357	P	P10323_2	57	327	383	0.626	0.626	PPPPPPPP		80.76,78.65,80.71,81.99,78.59,78.06,78.73,74.2	78.69	YFQPPPRPLPPRPPAAQPRPPPSPPPPPPPPASPLPPPPPPPPPTPSSTTKLPQGLS	GG	64.66,59.52,57.98,69.21,71.75,73.81,70.98,70.46,68.56,73.25,73.51,67.77,70.73,71.51,65.26,62.51,69.59,70.43,67.92,75.75,76.8,75.64,79.2,80.76,78.65,80.71,81.99,78.59,78.06,78.73,74.2,69.71,73.57,69.51,69.53,74.82,74.85,68.99,73.09,71.64,62.71,64.43,60.85,51.44,56.85,42.1,36.5,38.87,34.88,34.66,33.07,34.01,40.18,41.41,49.39,60.09,74.93	69.59	PPTTRPPPIRPPFSHPISAHLPWYFQPPPRPLPPRPPAAQPRPPPSPPPP	PPPPASPLPPPPPPPPPTPSSTTKLPQGLSFAKRLQQLIEVLKGKTYSDG	GGG	HHHHHHHHHHHHHHHTTSS
P10323	P10323_p_2_1	9	362	370	P	P10323_2	57	327	383	0.626	0.626	PPPPPPPPP		74.82,74.85,68.99,73.09,71.64,62.71,64.43,60.85,51.44	68.99	YFQPPPRPLPPRPPAAQPRPPPSPPPPPPPPASPLPPPPPPPPPTPSSTTKLPQGLS	GG	64.66,59.52,57.98,69.21,71.75,73.81,70.98,70.46,68.56,73.25,73.51,67.77,70.73,71.51,65.26,62.51,69.59,70.43,67.92,75.75,76.8,75.64,79.2,80.76,78.65,80.71,81.99,78.59,78.06,78.73,74.2,69.71,73.57,69.51,69.53,74.82,74.85,68.99,73.09,71.64,62.71,64.43,60.85,51.44,56.85,42.1,36.5,38.87,34.88,34.66,33.07,34.01,40.18,41.41,49.39,60.09,74.93	69.59	FSHPISAHLPWYFQPPPRPLPPRPPAAQPRPPPSPPPPPPPPASPLPPPP	PPPPPTPSSTTKLPQGLSFAKRLQQLIEVLKGKTYSDGKNHYDMETTELP	GGG	HHHHHHHHHHHHHHHTTSS
P10643	P10643_p_1_1	6	227	232	S	P10643_2	22	219	240	0.525	0.525	SSSSSS	S	27.3,25.18,29.35,31.62,29.58,33.76	29.465	SRKRSFFRSSSSSSRSYTSHTN	S S S TTHH	29.36,27.35,28.24,26.67,26.65,29.03,28.43,25.13,27.3,25.18,29.35,31.62,29.58,33.76,39.95,31.58,38.99,34.92,35.9,39.67,48.94,49.32	29.47	SGNVLSYTFQVKINNDFNYEFYNSTWSYVKHTSTEHTSSSRKRSFFRSSS	SSSRSYTSHTNEIHKGKSYQLLVVENTVEVAQFINNNPEFLQLAEPFWKE	TTEEEEEEEEEE SS EEEEESSHHHHHHHHHHHHHHS S S	S TTHHHHHHH EEEEEEEEEEEEEEEEE GGG B HHHHHH
P10645	P10645_p_1_1	8	172	179	E	P10645_1	353	88	440	0.541	0.541	EEEEEEEE		36.37,33.82,35.26,35.76,35.29,39.9,40.89,39.08	36.065	KERAHQQKKHSGFEDELSEVLENQSSQAELKEAVEEPSSKDVMEKREDSKEAEKSGEATDGARPQALPEPMQESKAEGNNQAPGEEEEEEEEATNTHPPASLPSQKYPGPQAEGDSEGLSQGLVDREKGLSAEPGWQAKREEEEEEEEEAEAGEEAVPEEEGPTVVLNPHPSLGYKEIRKGESRSEALAVDGAGKPGAEEAQDPEGKGEQEHSQQKEEEEEMAVVPQGLFRGGKSGELEQEEERLSKEWEDSKRWSKMDQLAKELTAEKRLEGQEEEEDNRDSSMKLSFRARAYGFRGPGPQLRRGWRPSSREDSLEAGLPLQVRGYPEEKKEEEGSANRRPEDQELESLSAI	HHHHHHHHHHHHHHHHHHHHHHHHHHHHHTTSSS SSSSSS SS SS S THHHHHHHHHHHHHHHHHHHHHHHHHHHHHHHHHHHHHHHHHSTTS TT TT HHHHHHHHHHHH	91.13,89.34,85.33,84.85,84.69,80.64,78.8,78.88,76.31,67.34,67.45,68.93,67.18,74.04,72.66,71.79,72.06,74.58,75.63,77.82,71.59,76.32,74.11,70.23,60.32,59.66,56.44,53.04,52.39,52.15,50.69,42.45,41.82,45.07,41.36,33.93,40.13,33.5,45.09,41.81,35.93,47.48,40.48,43.56,46.72,43.49,42.79,41.75,47.76,41.5,40.32,42.37,40.11,50.72,40.79,45.66,45.51,43.71,47.99,42.81,40.87,39.49,38.42,41.43,31.15,33.25,34.64,…	44.71	SKDVMEKREDSKEAEKSGEATDGARPQALPEPMQESKAEGNNQAPGEEEE	EEEEATNTHPPASLPSQKYPGPQAEGDSEGLSQGLVDREKGLSAEPGWQA
P10645	P10645_p_2_1	9	228	236	E	P10645_1	353	88	440	0.541	0.541	EEEEEEEEE	SSSSSS	38.2,40.8,39.24,43.16,45.71,46.85,45.28,44.1,44.76	44.1	KERAHQQKKHSGFEDELSEVLENQSSQAELKEAVEEPSSKDVMEKREDSKEAEKSGEATDGARPQALPEPMQESKAEGNNQAPGEEEEEEEEATNTHPPASLPSQKYPGPQAEGDSEGLSQGLVDREKGLSAEPGWQAKREEEEEEEEEAEAGEEAVPEEEGPTVVLNPHPSLGYKEIRKGESRSEALAVDGAGKPGAEEAQDPEGKGEQEHSQQKEEEEEMAVVPQGLFRGGKSGELEQEEERLSKEWEDSKRWSKMDQLAKELTAEKRLEGQEEEEDNRDSSMKLSFRARAYGFRGPGPQLRRGWRPSSREDSLEAGLPLQVRGYPEEKKEEEGSANRRPEDQELESLSAI	HHHHHHHHHHHHHHHHHHHHHHHHHHHHHTTSSS SSSSSS SS SS S THHHHHHHHHHHHHHHHHHHHHHHHHHHHHHHHHHHHHHHHHSTTS TT TT HHHHHHHHHHHH	91.13,89.34,85.33,84.85,84.69,80.64,78.8,78.88,76.31,67.34,67.45,68.93,67.18,74.04,72.66,71.79,72.06,74.58,75.63,77.82,71.59,76.32,74.11,70.23,60.32,59.66,56.44,53.04,52.39,52.15,50.69,42.45,41.82,45.07,41.36,33.93,40.13,33.5,45.09,41.81,35.93,47.48,40.48,43.56,46.72,43.49,42.79,41.75,47.76,41.5,40.32,42.37,40.11,50.72,40.79,45.66,45.51,43.71,47.99,42.81,40.87,39.49,38.42,41.43,31.15,33.25,34.64,…	44.71	NTHPPASLPSQKYPGPQAEGDSEGLSQGLVDREKGLSAEPGWQAKREEEE	EEEEEAEAGEEAVPEEEGPTVVLNPHPSLGYKEIRKGESRSEALAVDGAG	S	SSSSS
P11161	P11161_p_1_1	7	167	173	P	P11161_1	52	127	178	0.823	0.823	PPPPPPP		67.09,61.76,69.36,69.86,65.76,64.16,53.53	65.76	PASTTASSSVTSASPNPLATGPLGVCTMSQTQPDLDHLYSPPPPPPPYSGCA		41.3,36.59,39.34,38.13,35.74,36.97,34.71,40.39,33.68,36.78,35.09,32.9,37.61,34.6,48.78,42.67,47.97,36.79,41.68,44.2,44.27,45.25,37.01,36.17,36.41,32.14,40.19,31.72,39.15,36.47,38.63,38.04,45.77,38.02,42.93,38.1,43.98,35.88,45.63,52.0,67.09,61.76,69.36,69.86,65.76,64.16,53.53,44.24,44.65,37.77,34.55,40.91	39.245	ILQGVTSPASTTASSSVTSASPNPLATGPLGVCTMSQTQPDLDHLYSPPP	PPPPYSGCAGDLYQDPSAFLSAATTSTSSSLAYPPPPSYPSPKPATDPGL
P11362	P11362_p_1_1	7	127	133	D	P11362_1	35	120	154	0.451	0.451	DDDDDDD		42.34,44.61,37.87,44.58,44.43,37.36,36.88	42.34	DALPSSEDDDDDDDSSSEEKETDNTKPNRMPVAPY	S EEEE	66.24,52.86,50.19,37.44,39.13,38.59,39.57,42.34,44.61,37.87,44.58,44.43,37.36,36.88,31.17,36.46,30.47,38.12,38.65,37.3,37.65,34.12,33.96,36.41,38.47,38.51,42.13,46.49,61.48,80.94,87.09,89.42,92.48,94.74,94.01	39.13	RITGEEVEVQDSVPADSGLYACVTSSPSGSDTTYFSVNVSDALPSSEDDD	DDDDSSSEEKETDNTKPNRMPVAPYWTSPEKMEKKLHAVPAAKTVKFKCP	EE SSEEEESS GGG EEEEEEEEETTEEEEEEEEEEE S	EEEEES GGGG EEEEETT EEEE
P11831	P11831_p_1_1	6	60	65	A	P11831_1	97	1	97	0.764	0.764	AAAAAA		35.29,38.74,33.1,38.94,35.12,41.25	37.015	MLPTQAGAAAALGRGSALGGSLNRTPTGRPGGGGGTRGANGGRVPGNGAGLGPGRLEREAAAAAATTPAPTAGALYSGSEGDSESGEEEELGAERRG		52.96,48.7,59.95,46.79,46.75,47.32,43.04,42.65,39.11,40.51,41.69,43.88,40.84,45.19,41.47,41.09,44.53,47.43,39.28,41.68,42.46,49.65,42.27,42.4,44.75,47.63,45.03,39.8,40.75,48.21,42.84,44.55,43.6,43.09,43.89,46.32,43.13,39.7,48.65,44.54,40.12,41.28,39.65,46.63,48.08,44.16,46.24,43.95,44.72,41.64,51.19,42.53,43.13,43.56,40.37,44.03,40.77,40.72,39.03,35.29,38.74,33.1,38.94,35.12,41.25,41.31,47.19,43.…	43.09	GRGSALGGSLNRTPTGRPGGGGGTRGANGGRVPGNGAGLGPGRLEREAAA	AAATTPAPTAGALYSGSEGDSESGEEEELGAERRGLKRSLSEMEIGMVVG
P11836	P11836_p_1_1	6	269	274	E	P11836_1	51	247	297	0.546	0.546	EEEEEE		38.75,38.52,35.76,38.27,35.22,36.86	37.565	VGLTETSSQPKNEEDIEIIPIQEEEEEETETNFPEPPQDQESSPIENDSSP	HHHHHTS	55.62,49.6,52.81,47.48,47.63,43.38,40.88,35.41,33.87,32.98,35.81,38.04,41.91,41.37,40.45,41.92,35.97,44.13,46.02,36.35,45.79,37.37,38.75,38.52,35.76,38.27,35.22,36.86,39.8,38.4,46.25,41.24,45.27,44.68,42.54,53.96,47.16,42.11,45.45,43.31,43.89,45.48,42.95,50.06,50.53,50.17,49.21,49.5,52.13,57.03,61.48	43.31	RPKSNIVLLSAEEKKEQTIEIKEEVVGLTETSSQPKNEEDIEIIPIQEEE	EEETETNFPEPPQDQESSPIENDSSP||||||||||||||||||||||||	HHHHHHHHHHHHHHHHHHHHHHHHHHHHHTS	||||||||||||||||||||||||
P13378	P13378_p_3_1	9	115	123	P	P13378_1	68	60	127	0.664	0.664	PPPPPPPPP		84.5,83.78,83.95,84.7,83.94,82.5,80.24,79.03,76.32	83.78	GFPHAPPQAHAHPHPSPPPSGTGCGGREGRGQEYFHPGGGSPAAAYQAAPPPPPHPPPPPPPPPCGGI		44.07,51.61,53.8,46.64,52.09,63.98,56.76,53.5,47.7,56.42,48.09,62.88,55.68,54.24,59.79,61.97,65.85,62.56,58.05,58.5,50.34,54.28,45.75,48.26,44.21,43.59,45.33,46.98,46.02,53.02,47.08,48.57,42.09,55.93,45.44,60.91,56.88,47.01,52.57,46.55,56.61,52.04,48.28,54.29,54.18,59.91,60.54,61.77,71.83,78.45,80.28,81.18,82.02,82.92,80.8,84.5,83.78,83.95,84.7,83.94,82.5,80.24,79.03,76.32,55.56,49.82,42.23,53.68	55.62	HAHPHPSPPPSGTGCGGREGRGQEYFHPGGGSPAAAYQAAPPPPPHPPPP	PPPPPCGGIACHGEPAKFYGYDNLQRQPIFTTQQEAELVQYPDCKSSSGN		TTSSS
P13645	P13645_p_1_1	8	17	24	G	P13645_1	24	1	24	0.672	0.672	GGGGGGGG		31.9,32.77,30.99,34.34,33.87,35.98,35.2,33.38	33.625	MSVRYSSSKHYSSSRSGGGGGGGG		45.52,41.91,44.98,41.64,43.4,37.52,36.95,34.36,41.34,36.0,35.51,33.31,33.38,35.92,33.47,37.31,31.9,32.77,30.99,34.34,33.87,35.98,35.2,33.38	35.715	||||||||||||||||||||||||||||||MSVRYSSSKHYSSSRSGGGG	GGGGCGGGGGVSSLRISSSKGSLGGGFSSGGFSGGSFSRGSSGGGCFGGS	||||||||||||||||||||||||||||||
P13645	P13645_p_2_1	6	536	541	G	P13645_2	132	453	584	0.714	0.714	GGGGGG		35.34,33.47,37.04,34.44,37.18,30.9	34.89	LEGEGSSGGGGRGGGSFGGGYGGGSSGGGSSGGGHGGGHGGSSGGGYGGGSSGGGSSGGGYGGGSSSGGHGGSSSGGYGGGSSGGGGGGYGGGSSGGGSSSGGGYGGGSSSGGHKSSSSGSVGESSSKGPRY	HHHHHTTS	73.46,62.15,57.93,52.96,45.9,47.87,45.86,36.53,35.08,32.21,38.96,36.84,38.64,36.06,37.51,37.95,41.43,39.22,38.37,39.54,41.54,41.01,39.51,42.19,41.16,43.91,42.74,41.61,42.51,44.85,51.39,41.81,43.75,43.01,44.45,42.35,42.99,40.74,42.9,41.48,42.35,38.18,41.98,37.68,39.44,35.88,42.23,38.22,36.97,38.96,37.0,42.59,37.71,36.39,37.21,34.45,38.49,33.42,36.92,34.26,34.26,35.04,33.15,36.11,32.2,38.46,34.12,3…	37.89	GGHGGSSGGGYGGGSSGGGSSGGGYGGGSSSGGHGGSSSGGYGGGSSGGG	GGGYGGGSSGGGSSSGGGYGGGSSSGGHKSSSSGSVGESSSKGPRY||||		||||
P13667	P13667_p_2_1	7	41	47	E	P13667_1	35	24	58	0.347	0.347	EEEEEEE		29.97,32.84,29.12,31.96,30.93,29.27,32.34	30.93	AEGPDEDSSNRENAIEDEEEEEEEDDDEEEDDLEV	THHHHHHT	25.11,26.01,27.81,27.88,30.23,25.8,25.52,27.55,25.68,26.76,28.27,24.5,31.73,27.47,27.31,26.27,27.44,29.97,32.84,29.12,31.96,30.93,29.27,32.34,37.9,42.04,44.78,44.99,46.96,53.59,63.68,76.37,84.36,90.18,94.25	29.97	|||||||MRPRKAFLLLLLLGLVQLLAVAGAEGPDEDSSNRENAIEDEEE	EEEEDDDEEEDDLEVKEENGVLVLNDANFDNFVADKDTVLLEFYAPWCGH	|||||||	THHHHHHT EEETTEEEE TTTHHHHHTT SEEEEEEE TT HH
P13682	P13682_p_1_1	6	22	27	E	P13682_1	23	16	38	0.531	0.531	EEEEEE		24.74,25.95,28.87,24.02,28.43,25.93	25.94	PVKVKKEEEEEENFPGQASSQQV		29.63,27.73,25.32,27.73,25.97,25.78,24.74,25.95,28.87,24.02,28.43,25.93,24.43,23.18,24.92,25.33,24.3,21.48,29.1,22.64,27.73,21.76,24.82	25.33	||||||||||||||||||||||||||MTAELREAMALAPWGPVKVKKEEE	EEENFPGQASSQQVHSENIKVWAPVQGLQTGLDGSEEEEKGQNISWDMAV	|||||||||||||||||||||||||| HHHHHHHHT	TT
P14314	P14314_p_1_1	13	313	325	E	P14314_2	77	281	357	0.48	0.48	EEEEEEEEEEEEE		35.94,30.65,35.27,36.6,33.78,35.46,33.5,39.35,38.96,34.79,37.97,38.25,33.99	35.46	RSEALPTDLPAPSAPDLTEPKEEQPPVPSSPTEEEEEEEEEEEEEAEEEEEEEDSEEAPPPLSPPQPASPAEEDKMP	TTS S S GGGS	75.39,67.14,59.66,52.1,43.49,34.64,30.35,31.16,33.04,32.37,31.04,37.45,32.14,33.94,38.14,31.86,32.77,30.65,34.16,35.93,30.92,37.92,32.09,33.89,40.7,31.68,37.87,42.08,30.21,35.28,35.96,28.42,35.94,30.65,35.27,36.6,33.78,35.46,33.5,39.35,38.96,34.79,37.97,38.25,33.99,36.31,34.74,37.55,33.32,37.79,36.74,31.19,37.32,31.72,37.5,38.26,32.24,34.88,38.23,46.05,38.47,37.18,43.95,40.79,37.79,36.93,41.22,43…	36.93	YDRVWAAIRDKYRSEALPTDLPAPSAPDLTEPKEEQPPVPSSPTEEEEEE	EEEEEEEAEEEEEEEDSEEAPPPLSPPQPASPAEEDKMPPYDEQTQAFID	IIIIHHHHTTT TTS S	S GGGS HHHHHHHH
P14314	P14314_p_2_1	7	327	333	E	P14314_2	77	281	357	0.48	0.48	EEEEEEE		34.74,37.55,33.32,37.79,36.74,31.19,37.32	36.74	RSEALPTDLPAPSAPDLTEPKEEQPPVPSSPTEEEEEEEEEEEEEAEEEEEEEDSEEAPPPLSPPQPASPAEEDKMP	TTS S S GGGS	75.39,67.14,59.66,52.1,43.49,34.64,30.35,31.16,33.04,32.37,31.04,37.45,32.14,33.94,38.14,31.86,32.77,30.65,34.16,35.93,30.92,37.92,32.09,33.89,40.7,31.68,37.87,42.08,30.21,35.28,35.96,28.42,35.94,30.65,35.27,36.6,33.78,35.46,33.5,39.35,38.96,34.79,37.97,38.25,33.99,36.31,34.74,37.55,33.32,37.79,36.74,31.19,37.32,31.72,37.5,38.26,32.24,34.88,38.23,46.05,38.47,37.18,43.95,40.79,37.79,36.93,41.22,43…	36.93	YRSEALPTDLPAPSAPDLTEPKEEQPPVPSSPTEEEEEEEEEEEEEAEEE	EEEEDSEEAPPPLSPPQPASPAEEDKMPPYDEQTQAFIDAAQEARNKFEE	TTS S	S GGGS HHHHHHHHHHHHHHHHHHH
P14625	P14625_p_1_1	6	313	318	E	P14625_1	36	288	323	0.4	0.4	EEEEEE		37.32,40.54,41.07,38.01,41.77,40.7	40.62	TVEEPMEEEEAAKEEKEESDDEAAVEEEEEEKKPKT	EEEEE TTSTTSS E	72.75,72.76,65.37,64.97,54.31,48.47,51.3,48.96,48.67,44.73,45.2,45.43,44.59,41.2,38.93,36.49,39.06,38.92,40.67,41.65,42.34,42.33,42.7,39.61,43.05,37.32,40.54,41.07,38.01,41.77,40.7,43.46,47.86,50.47,46.69,58.81	43.255	NLVKKYSQFINFPIYVWSSKTETVEEPMEEEEAAKEEKEESDDEAAVEEE	EEEKKPKTKKVEKTVWDWELMNDIKPIWQRPSKEVEEDEYKAFYKSFSKE	HHHHHHSTT SS EEEEEEEEEEEEEE TTSTTSS	EEEEEEEEEEEEES S GGGS GGGS HHHHHHHHHHHHT
P14651	P14651_p_1_1	11	154	164	G	P14651_2	56	137	192	0.657	0.657	GGGGGGGGGGG		41.96,42.07,44.33,42.26,43.71,45.2,42.53,43.78,42.11,42.16,44.62	42.53	RQTSKLKNNSPGTAEGCGGGGGGGGGGGSGGSGGGGGGGGGGDKSPPGSAASKRAR	HHTTSS SS S	59.97,58.99,54.7,55.04,51.14,54.34,44.39,45.8,38.29,43.79,49.19,41.3,47.97,43.22,43.65,43.0,43.15,41.96,42.07,44.33,42.26,43.71,45.2,42.53,43.78,42.11,42.16,44.62,42.88,43.49,45.95,42.96,44.97,41.34,43.63,42.1,46.26,44.45,44.57,45.19,42.01,49.93,54.77,51.33,60.01,65.04,61.8,49.8,58.61,61.21,59.13,59.81,73.41,81.01,87.38,89.32	45.08	PSKSGPPKCGPGTNSTLTKQIFPWMKESRQTSKLKNNSPGTAEGCGGGGG	GGGGGGSGGSGGGGGGGGGGDKSPPGSAASKRARTAYTSAQLVELEKEFH	HHHHHHHHTTSS	SS S HHHHHHHHHHHH
P14651	P14651_p_2_1	10	169	178	G	P14651_2	56	137	192	0.657	0.657	GGGGGGGGGG		44.97,41.34,43.63,42.1,46.26,44.45,44.57,45.19,42.01,49.93	44.51	RQTSKLKNNSPGTAEGCGGGGGGGGGGGSGGSGGGGGGGGGGDKSPPGSAASKRAR	HHTTSS SS S	59.97,58.99,54.7,55.04,51.14,54.34,44.39,45.8,38.29,43.79,49.19,41.3,47.97,43.22,43.65,43.0,43.15,41.96,42.07,44.33,42.26,43.71,45.2,42.53,43.78,42.11,42.16,44.62,42.88,43.49,45.95,42.96,44.97,41.34,43.63,42.1,46.26,44.45,44.57,45.19,42.01,49.93,54.77,51.33,60.01,65.04,61.8,49.8,58.61,61.21,59.13,59.81,73.41,81.01,87.38,89.32	45.08	TLTKQIFPWMKESRQTSKLKNNSPGTAEGCGGGGGGGGGGGSGGSGGGGG	GGGGGDKSPPGSAASKRARTAYTSAQLVELEKEFHFNRYLCRPRRVEMAN	HHHHHHHHTTSS	SS S HHHHHHHHHHHHH SS HHHHHHHHH
P14652	P14652_p_1_1	7	79	85	P	P14652_1	104	39	142	0.738	0.738	PPPPPPP		74.59,73.59,74.27,74.6,74.85,72.92,64.92	74.27	ESTLIPPPPPFEQTFPSLQPGASTLQRPRSQKRAEDGPALPPPPPPPLPAAPPAPEFPWMKEKKSAKKPSQSATSPSPAASAVPASGVGSPADGLGLPEAGGGG	GGGG	52.1,50.43,47.64,52.44,55.84,67.92,72.03,69.87,70.65,64.48,47.97,57.86,46.2,42.77,44.45,44.88,40.48,48.31,49.84,40.02,42.94,47.53,49.73,50.03,54.33,45.51,42.91,44.53,43.66,46.93,51.38,39.82,48.09,45.48,56.36,47.38,54.59,51.93,52.75,66.35,74.59,73.59,74.27,74.6,74.85,72.92,64.92,66.17,63.3,59.55,65.56,67.73,70.68,75.12,75.21,79.91,80.65,79.35,87.25,81.08,77.06,68.31,62.65,54.38,50.86,52.22,45.98,4…	51.89	FQTSSIKESTLIPPPPPFEQTFPSLQPGASTLQRPRSQKRAEDGPALPPP	PPPPLPAAPPAPEFPWMKEKKSAKKPSQSATSPSPAASAVPASGVGSPAD	S	GGGG
P14866	P14866_p_1_1	7	39	45	G	P14866_1	100	1	100	0.578	0.578	GGGGGGG		31.72,32.45,32.39,32.16,33.69,31.81,34.15	32.39	MSRRLLPRAEKRRRRLEQRQQPDEQRRRSGAMVKMAAAGGGGGGGRYYGGGSEGGRAPKRLKTDNAGDQHGGGGGGGGGAGAAGGGGGGENYDDPHKTPA	HHHHHHHHHHTT S TTSSSS TTS	42.63,35.08,43.65,44.84,43.65,47.35,51.12,55.06,50.92,54.96,57.37,57.88,61.31,58.94,56.99,56.09,52.26,51.35,53.83,45.22,43.29,44.82,39.17,38.53,37.78,40.62,41.15,39.87,36.8,33.81,32.93,32.83,33.46,32.49,28.81,32.89,31.52,32.86,31.72,32.45,32.39,32.16,33.69,31.81,34.15,31.38,36.7,37.0,33.94,34.9,31.29,35.75,34.22,31.79,33.85,33.0,31.38,40.62,31.26,32.58,34.97,30.2,35.22,35.35,36.36,34.81,36.8,37.3…	35.285	|||||||||MSRRLLPRAEKRRRRLEQRQQPDEQRRRSGAMVKMAAAGGG	GGGGRYYGGGSEGGRAPKRLKTDNAGDQHGGGGGGGGGAGAAGGGGGGEN	||||||||| HHHHHHHHHHTT S TTSSSS
P14866	P14866_p_2_1	9	71	79	G	P14866_1	100	1	100	0.578	0.578	GGGGGGGGG		34.74,35.1,32.49,33.91,34.28,32.54,35.03,32.8,34.63	34.28	MSRRLLPRAEKRRRRLEQRQQPDEQRRRSGAMVKMAAAGGGGGGGRYYGGGSEGGRAPKRLKTDNAGDQHGGGGGGGGGAGAAGGGGGGENYDDPHKTPA	HHHHHHHHHHTT S TTSSSS TTS	42.63,35.08,43.65,44.84,43.65,47.35,51.12,55.06,50.92,54.96,57.37,57.88,61.31,58.94,56.99,56.09,52.26,51.35,53.83,45.22,43.29,44.82,39.17,38.53,37.78,40.62,41.15,39.87,36.8,33.81,32.93,32.83,33.46,32.49,28.81,32.89,31.52,32.86,31.72,32.45,32.39,32.16,33.69,31.81,34.15,31.38,36.7,37.0,33.94,34.9,31.29,35.75,34.22,31.79,33.85,33.0,31.38,40.62,31.26,32.58,34.97,30.2,35.22,35.35,36.36,34.81,36.8,37.3…	35.285	QRRRSGAMVKMAAAGGGGGGGRYYGGGSEGGRAPKRLKTDNAGDQHGGGG	GGGGGAGAAGGGGGGENYDDPHKTPASPVVHIRGLIDGVVEADLVEALQE	TSSSS	TTS SEEEEE TT HHHHHHHHTT
P14866	P14866_p_3_1	6	84	89	G	P14866_1	100	1	100	0.578	0.578	GGGGGG		35.15,33.6,31.77,32.03,28.26,32.18	32.105	MSRRLLPRAEKRRRRLEQRQQPDEQRRRSGAMVKMAAAGGGGGGGRYYGGGSEGGRAPKRLKTDNAGDQHGGGGGGGGGAGAAGGGGGGENYDDPHKTPA	HHHHHHHHHHTT S TTSSSS TTS	42.63,35.08,43.65,44.84,43.65,47.35,51.12,55.06,50.92,54.96,57.37,57.88,61.31,58.94,56.99,56.09,52.26,51.35,53.83,45.22,43.29,44.82,39.17,38.53,37.78,40.62,41.15,39.87,36.8,33.81,32.93,32.83,33.46,32.49,28.81,32.89,31.52,32.86,31.72,32.45,32.39,32.16,33.69,31.81,34.15,31.38,36.7,37.0,33.94,34.9,31.29,35.75,34.22,31.79,33.85,33.0,31.38,40.62,31.26,32.58,34.97,30.2,35.22,35.35,36.36,34.81,36.8,37.3…	35.285	AAGGGGGGGRYYGGGSEGGRAPKRLKTDNAGDQHGGGGGGGGGAGAAGGG	GGGENYDDPHKTPASPVVHIRGLIDGVVEADLVEALQEFGPISYVVVMPK		TTS SEEEEE TT HHHHHHHHTTTS EEEEEEEGG
P14866	P14866_p_4_1	8	366	373	P	P14866_2	95	284	378	0.483	0.483	PPPPPPPP	S	56.85,53.72,56.59,56.67,47.85,50.13,50.65,42.56	52.185	DYTNPNLSGQGDPGSNPNKRQRQPPLLGDHPAEYGGPHGGYHSHYHDEGYGPPPPHYEGRRMGPPVGGHRRGPSRYGPQYGHPPPPPPPPEYGPH	ETT GGG S S S	89.3,86.44,84.19,80.82,72.51,69.82,65.9,49.66,42.18,35.51,35.75,34.59,37.93,35.26,36.01,35.49,32.87,35.74,39.17,35.19,33.79,34.96,34.74,35.23,35.91,35.97,35.7,36.21,36.7,33.97,38.59,37.81,36.59,39.64,37.56,37.35,38.33,39.71,37.27,35.24,36.74,37.41,35.13,38.9,38.29,39.68,35.54,40.48,40.61,44.77,40.05,45.88,55.2,46.9,48.69,39.22,41.93,36.04,41.41,43.13,42.33,45.18,38.11,49.39,51.51,45.73,42.18,37.0…	40.48	PHGGYHSHYHDEGYGPPPPHYEGRRMGPPVGGHRRGPSRYGPQYGHPPPP	PPPPEYGPHADSPVLMVYGLDQSKMNCDRVFNVFCLYGNVEKVKFMKSKP		S S S SEEEEE TTT HHHHHHHHTTTS EEEEEE TTST
P15056	P15056_p_1_1	6	6	11	G	P15056_1	38	1	38	0.914	0.914	GGGGGG		36.67,35.49,32.85,34.07,33.13,31.79	33.6	MAALSGGGGGGAEPGQALFNGDMEPEAGAGAGAAASSA		33.02,32.39,33.17,33.8,32.06,36.67,35.49,32.85,34.07,33.13,31.79,33.42,28.75,39.29,28.43,29.27,29.83,28.28,32.92,29.25,33.23,27.52,33.53,27.49,44.19,32.05,30.96,33.35,32.93,30.72,33.55,27.55,30.82,29.4,33.7,35.66,33.45,37.7	32.925	||||||||||||||||||||||||||||||||||||||||||MAALSGGG	GGGAEPGQALFNGDMEPEAGAGAGAAASSAADPAIPEEVWNIKQMIKLTQ	||||||||||||||||||||||||||||||||||||||||||	THHHHHHHHHHHHHHHHH
P16298	P16298_p_1_1	11	11	21	P	P16298_1	25	1	25	0.659	0.659	PPPPPPPPPPP	T	73.27,77.78,79.52,79.08,80.22,79.31,76.06,70.42,67.91,67.66,65.37	76.06	MAAPEPARAAPPPPPPPPPPPGADR	TTTT	50.23,49.8,56.43,59.2,58.92,62.14,62.12,61.6,66.68,70.88,73.27,77.78,79.52,79.08,80.22,79.31,76.06,70.42,67.91,67.66,65.37,69.1,74.32,86.56,90.38	69.1	|||||||||||||||||||||||||||||||||||MAAPEPARAAPPPPP	PPPPPPGADRVVKAVPFPPTHRLTSEEVFDLDGIPRVDVLKNHLVKEGRV	|||||||||||||||||||||||||||||||||||	TTTT S TTS B HHHHB TTS B HHHHHHHHTTT B
P16989	P16989_p_1_1	7	8	14	T	P16989_1	82	1	82	0.872	0.872	TTTTTTT		47.66,64.74,50.17,64.57,54.68,66.6,63.14	63.14	MSEAGEATTTTTTTLPQAPTEAAAAAPQDPAPKSPVGSGAPQAAAPAPAAHVAGNPGGDAAPAATGTAAAASLATAAGSEDA		63.12,64.29,58.66,53.6,61.49,57.15,51.88,47.66,64.74,50.17,64.57,54.68,66.6,63.14,71.58,75.24,50.93,61.1,61.13,53.29,47.92,48.17,50.11,48.19,52.18,54.13,57.33,54.72,53.47,67.07,57.1,64.51,64.4,49.55,67.73,51.19,50.75,52.37,48.8,56.76,58.77,52.14,46.98,51.94,59.14,60.21,53.19,71.55,47.79,54.29,51.35,51.98,49.54,44.4,62.74,57.0,42.9,49.73,49.38,48.11,50.44,55.02,41.27,47.25,41.83,40.06,45.08,38.68,…	51.96	||||||||||||||||||||||||||||||||||||||||MSEAGEATTT	TTTTLPQAPTEAAAAAPQDPAPKSPVGSGAPQAAAPAPAAHVAGNPGGDA	||||||||||||||||||||||||||||||||||||||||
P17480	P17480_p_1_1	8	748	755	S	P17480_5	117	648	764	0.328	0.328	SSSSSSSS		36.96,32.6,36.31,34.15,36.21,34.47,32.3,39.3	35.34	YISNKRKSMTKLRGPNPKSSRTTLQSKSESEEDDEEDEDDEDEDEEEEDDENGDSSEDGGDSSESSSEDESEDGDENEEDDEDEDDDEDDDEDEDNESEGSSSSSSSSGDSSDSDSN	HHHHHHHHHHHT	86.45,85.9,82.49,80.81,79.0,74.75,74.13,67.62,58.74,61.83,51.12,50.57,38.72,39.47,44.27,33.18,38.63,32.56,33.89,33.44,31.63,27.8,30.76,36.47,29.94,33.7,26.89,32.42,27.19,32.9,31.06,28.8,36.04,33.57,35.92,31.99,32.92,38.19,31.08,40.45,34.12,32.54,36.89,30.86,35.33,28.71,35.28,32.73,32.85,37.01,31.79,36.67,34.88,33.41,39.44,35.35,28.9,41.0,33.65,34.49,32.94,40.43,32.09,33.03,32.42,31.1,33.88,30.97,…	36.51	SSEDGGDSSESSSEDESEDGDENEEDDEDEDDDEDDDEDEDNESEGSSSS	SSSSGDSSDSDSN|||||||||||||||||||||||||||||||||||||		|||||||||||||||||||||||||||||||||||||
P17483	P17483_p_1_1	15	73	87	P	P17483_1	134	1	134	0.698	0.698	PPPPPPPPPPPPPPP		78.83,80.53,81.29,82.82,85.02,85.08,85.09,85.63,86.01,85.0,84.16,82.25,81.06,78.87,75.83	82.82	MAMSSFLINSNYVDPKFPPCEEYSQSDYLPSDHSPGYYAGGQRRESSFQPEAGFGRRAACTVQRYAACRDPGPPPPPPPPPPPPPPPGLSPRAPAPPPAGALLPEPGQRCEAVSSSPPPPPCAQNPLHPSPSHS	GGG GGGGS S TTSSS S S	56.13,61.96,66.62,55.59,60.7,58.02,65.66,62.58,52.6,55.9,59.43,54.84,69.36,70.31,70.17,78.47,71.05,74.51,69.39,63.3,62.3,57.46,53.56,57.27,56.55,59.14,61.36,55.43,59.56,53.78,60.8,54.77,48.36,43.7,52.5,47.83,51.85,50.27,52.96,42.3,40.4,46.03,40.98,42.98,40.91,40.57,39.68,35.82,41.06,43.06,38.89,43.39,42.98,41.8,41.25,42.44,45.91,44.8,42.73,39.96,49.61,51.11,40.46,42.28,43.62,43.6,50.2,46.03,55.5,…	53.67	PSDHSPGYYAGGQRRESSFQPEAGFGRRAACTVQRYAACRDPGPPPPPPP	PPPPPPPPGLSPRAPAPPPAGALLPEPGQRCEAVSSSPPPPPCAQNPLHP	S TTSSS S S
P17542	P17542_p_1_1	10	265	274	G	P17542_3	83	249	331	0.747	0.747	GGGGGGGGGG		46.07,48.39,47.46,45.65,42.53,42.74,42.13,44.22,38.63,38.35	43.48	EGTQRAKTGKDPVVGAGGGGGGGGGGAPPDDLLQDVLSPNSSCGSSLDGAASPDSYTEEPAPKHTARSLHPAMLPAADGAGPR	HHHHHTTS S SSSSSS	84.85,78.96,76.01,67.14,62.53,62.15,61.21,61.81,60.25,59.27,63.19,62.12,56.73,58.18,51.07,51.09,46.07,48.39,47.46,45.65,42.53,42.74,42.13,44.22,38.63,38.35,51.9,61.19,51.98,48.89,50.96,53.4,55.19,51.68,47.38,58.29,53.87,58.19,51.37,49.09,47.88,54.05,44.39,48.82,48.46,57.88,50.97,52.64,55.42,49.66,48.03,59.83,61.95,53.19,51.11,51.08,62.37,51.01,56.67,56.53,49.7,57.73,51.74,53.86,51.74,52.38,52.5,4…	52.64	DKKLSKNEILRLAMKYINFLAKLLNDQEEEGTQRAKTGKDPVVGAGGGGG	GGGGGAPPDDLLQDVLSPNSSCGSSLDGAASPDSYTEEPAPKHTARSLHP	T HHHHHHHHHHHHHHHHHHHHHHHHHHHHHTTS S	SSSSSS
P17600	P17600_p_1_1	6	30	35	P	P17600_1	73	1	73	0.725	0.725	PPPPPP		47.67,55.88,56.96,57.34,56.19,53.7	56.035	MNYLRRRLSDSNFMANLPNGYMTDLQRPQPPPPPPGAHSPGATPGPGTATAERSSGVAPAASPAAPSPGSSGG	HHHHHHS GGGGTTS TTHHHHHT	41.53,41.94,38.8,42.48,47.7,54.96,51.21,41.46,41.3,41.4,40.04,49.55,45.18,35.52,48.5,44.89,36.32,38.69,39.47,41.27,44.52,40.76,46.42,45.94,47.08,46.52,38.91,40.51,38.95,47.67,55.88,56.96,57.34,56.19,53.7,48.0,40.93,40.88,41.69,40.46,39.68,41.44,44.81,46.05,44.61,47.51,47.58,38.48,40.32,40.48,42.36,39.8,37.83,42.29,41.89,41.51,44.97,53.23,54.39,50.13,47.6,54.52,53.25,41.81,39.87,42.89,38.2,49.18,4…	42.29	||||||||||||||||||MNYLRRRLSDSNFMANLPNGYMTDLQRPQPPP	PPPGAHSPGATPGPGTATAERSSGVAPAASPAAPSPGSSGGGGFFSSLSN	|||||||||||||||||| HHHHHHS GGGGTTS TTHHHHHT
P17676	P17676_p_1_1	9	162	170	P	P17676_3	22	157	178	0.716	0.716	PPPPPPPPP		59.72,59.46,70.37,67.71,73.86,72.06,70.92,73.42,60.45	70.37	FAPLHPPPPPPPPPAELKAEPG		40.31,45.38,48.81,42.01,56.24,59.72,59.46,70.37,67.71,73.86,72.06,70.92,73.42,60.45,42.2,47.41,45.89,42.42,39.85,41.29,45.9,41.65	48.11	DFLSDLFSDDYGGKNCKKPAEYGYVSLGRLGAAKGALHPGCFAPLHPPPP	PPPPPAELKAEPGFEPADCKRKEEAGAPGGGAGMAAGFPYALRAYLGYQA	THHHHTTSSS
P18089	P18089_p_1_1	12	298	309	E	P18089_2	89	241	329	0.6	0.6	EEEEEEEEEEEE	HHHHHHHHHHHH	53.0,55.2,54.66,53.58,54.01,53.23,52.93,50.38,50.64,46.66,47.22,45.1	52.965	ASAREVNGHSKSTGEKEEGETPEDTGTRALPPSWAALPNSGQGQKEGVCGASPEDEAEEEEEEEEEEEECEPQAVPVSPASACSPPLQQ	B TTTHHHHHHHHHHHHHHT	36.23,36.39,36.51,34.39,35.02,39.94,38.07,36.28,35.29,36.7,31.16,35.27,31.67,31.29,36.76,28.31,36.61,31.74,33.77,35.41,29.08,37.05,33.33,32.59,34.06,33.13,33.86,30.11,35.16,36.57,41.08,39.93,31.6,34.47,35.72,32.47,31.61,32.27,29.25,32.52,30.23,33.23,31.26,27.07,30.27,27.96,28.79,31.69,28.41,31.58,37.08,40.95,43.48,47.28,44.34,46.08,51.26,53.0,55.2,54.66,53.58,54.01,53.23,52.93,50.38,50.64,46.66,4…	35.36	GEKEEGETPEDTGTRALPPSWAALPNSGQGQKEGVCGASPEDEAEEEEEE	EEEEEECEPQAVPVSPASACSPPLQQPQGSRVLATLRGQVLLGRGVGAIG	B TTTHHHHHHHH	HHHHHHT TT SSHHHH
P18146	P18146_p_1_1	6	62	67	S	P18146_1	105	1	105	0.774	0.774	SSSSSS		37.99,37.36,40.55,41.58,41.26,43.16	40.905	MAAAKAEMQLMSPLQISDPFGSFPHSPTMDNYPKLEEMMLLSNGAPQFLGAAGAPEGSGSNSSSSSSGGGGGGGGGSNSSSSSSTFNPQADTGEQPYEHLTAESF	S S TTSSS S	44.71,40.95,49.61,53.32,48.16,51.85,49.63,48.82,50.54,49.33,50.93,55.96,37.5,43.43,43.07,34.99,41.49,41.05,37.11,35.1,33.99,40.6,36.3,42.04,37.53,34.82,36.78,36.28,39.11,36.76,33.93,35.08,42.35,38.37,37.76,39.95,41.95,36.41,40.12,41.76,39.37,44.54,40.66,46.29,40.38,41.35,37.88,37.57,40.35,36.63,40.82,40.16,38.72,49.11,50.83,40.61,40.45,44.3,40.66,43.63,34.94,37.99,37.36,40.55,41.58,41.26,43.16,40…	38.37	QISDPFGSFPHSPTMDNYPKLEEMMLLSNGAPQFLGAAGAPEGSGSNSSS	SSSGGGGGGGGGSNSSSSSSTFNPQADTGEQPYEHLTAESFPDISLNNEK	S TTSSS S
P18146	P18146_p_2_1	9	68	76	G	P18146_1	105	1	105	0.774	0.774	GGGGGGGGG		40.25,39.56,40.2,36.08,37.33,39.97,34.06,35.78,31.47	37.33	MAAAKAEMQLMSPLQISDPFGSFPHSPTMDNYPKLEEMMLLSNGAPQFLGAAGAPEGSGSNSSSSSSGGGGGGGGGSNSSSSSSTFNPQADTGEQPYEHLTAESF	S S TTSSS S	44.71,40.95,49.61,53.32,48.16,51.85,49.63,48.82,50.54,49.33,50.93,55.96,37.5,43.43,43.07,34.99,41.49,41.05,37.11,35.1,33.99,40.6,36.3,42.04,37.53,34.82,36.78,36.28,39.11,36.76,33.93,35.08,42.35,38.37,37.76,39.95,41.95,36.41,40.12,41.76,39.37,44.54,40.66,46.29,40.38,41.35,37.88,37.57,40.35,36.63,40.82,40.16,38.72,49.11,50.83,40.61,40.45,44.3,40.66,43.63,34.94,37.99,37.36,40.55,41.58,41.26,43.16,40…	38.37	SFPHSPTMDNYPKLEEMMLLSNGAPQFLGAAGAPEGSGSNSSSSSSGGGG	GGGGGSNSSSSSSTFNPQADTGEQPYEHLTAESFPDISLNNEKVLVETSY	S TTSSS S
P18146	P18146_p_3_1	6	79	84	S	P18146_1	105	1	105	0.774	0.774	SSSSSS		37.47,33.07,30.64,35.54,29.77,34.86	33.965	MAAAKAEMQLMSPLQISDPFGSFPHSPTMDNYPKLEEMMLLSNGAPQFLGAAGAPEGSGSNSSSSSSGGGGGGGGGSNSSSSSSTFNPQADTGEQPYEHLTAESF	S S TTSSS S	44.71,40.95,49.61,53.32,48.16,51.85,49.63,48.82,50.54,49.33,50.93,55.96,37.5,43.43,43.07,34.99,41.49,41.05,37.11,35.1,33.99,40.6,36.3,42.04,37.53,34.82,36.78,36.28,39.11,36.76,33.93,35.08,42.35,38.37,37.76,39.95,41.95,36.41,40.12,41.76,39.37,44.54,40.66,46.29,40.38,41.35,37.88,37.57,40.35,36.63,40.82,40.16,38.72,49.11,50.83,40.61,40.45,44.3,40.66,43.63,34.94,37.99,37.36,40.55,41.58,41.26,43.16,40…	38.37	YPKLEEMMLLSNGAPQFLGAAGAPEGSGSNSSSSSSGGGGGGGGGSNSSS	SSSTFNPQADTGEQPYEHLTAESFPDISLNNEKVLVETSYPSQTTRLPPI	TTSSS S
P18583	P18583_p_1_1	7	117	123	K	P18583_2	79	77	155	0.377	0.377	KKKKKKK		27.67,27.02,26.3,27.89,26.81,24.38,24.53	26.81	LRYKPDLKEGSRKSRCVSVQTDPTDEIPTKKSKKHKKHKNKKKKKKKEKEKKYKRQPEESESKTKSHDDGNIDLESDSF	S	36.12,33.8,31.01,39.27,35.12,29.38,34.67,31.2,25.12,23.74,21.59,24.25,25.2,23.3,27.93,19.9,28.69,25.9,27.84,23.81,29.5,29.58,37.92,32.51,32.81,32.54,26.77,36.81,33.27,27.71,32.67,28.14,28.94,26.93,28.22,30.86,26.41,30.2,28.25,25.65,27.67,27.02,26.3,27.89,26.81,24.38,24.53,22.33,23.81,24.19,29.03,25.51,28.22,27.01,29.19,27.59,32.23,26.71,22.78,23.79,23.81,24.66,26.04,25.01,26.99,24.99,26.49,28.08,…	27.59	SGVLDTELRYKPDLKEGSRKSRCVSVQTDPTDEIPTKKSKKHKKHKNKKK	KKKKEKEKKYKRQPEESESKTKSHDDGNIDLESDSFLKFDSEPSAVALEL	HHTTSS S
P18858	P18858_p_1_1	6	153	158	E	P18858_1	270	1	270	0.561	0.561	EEEEEE	HHHTT	47.03,46.83,44.92,42.89,42.24,35.11	43.905	MQRSIMSFFHPKKEGKAKKPEKEASNSSRETEPPPKAALKEWNGVVSESDSPVKRPGRKAARVLGSEGEEEDEALSPAKGQKPALDCSQVSPPRPATSPENNASLSDTSPMDSSPSGIPKRRTARKQLPKRTIQEVLEEQSEDEDREAKRKKEEEEEETPKESLTEAEVATEKEGEDGDQPTTPPKPLKTSKAETPTESVSEPEVATKQELQEEEEQTKPPRRAPKTLSSFFTPRKPAVKKEVKEEEPGAPGKEGAAEGPLDPSGYNPAK	THHHHHHHHHHHHHHHHHHHHHHHHHTT GGG TT	36.03,39.68,38.53,44.12,40.94,38.11,38.95,35.9,34.58,33.62,49.47,40.76,45.17,41.19,43.49,40.09,41.32,41.63,40.09,49.27,40.96,37.23,42.39,36.23,40.58,35.82,38.35,36.57,35.63,36.18,36.69,37.42,42.52,38.36,49.97,31.6,36.78,33.72,32.89,35.33,32.93,36.38,31.48,35.52,32.27,36.99,33.82,33.18,37.13,33.96,31.77,34.15,34.21,32.41,34.51,35.13,32.63,32.13,30.05,30.07,29.91,27.13,28.95,29.77,27.97,25.18,30.6,…	35.19	SDTSPMDSSPSGIPKRRTARKQLPKRTIQEVLEEQSEDEDREAKRKKEEE	EEETPKESLTEAEVATEKEGEDGDQPTTPPKPLKTSKAETPTESVSEPEV	THHHHHHHHHHHHHHHHHHHHHHHHH	TT
P19338	P19338_p_1_1	10	262	271	E	P19338_1	303	1	303	0.521	0.521	EEEEEEEEEE		46.61,44.11,38.73,42.93,38.57,43.54,39.52,42.2,41.82,46.5	42.565	MVKLAKAGKNQGDPKKMAPPPKEVEEDSEDEEMSEDEEDDSSGEEVVIPQKKGKKAAATSAKKVVVSPTKKVAVATPAKKAAVTPGKKAAATPAKKTVTPAKAVTTPGKKGATPGKALVATPGKKGAAIPAKGAKNGKNAKKEDSDEEEDDDSEEDEEDDEDEDEDEDEIEPAAMKAAAAAPASEDEDDEDDEDDEDDDDDEEDDSEEEAMETTPAKGKKAAKVVPVKAKNVAEDEDEEEDDEDEDDDDDEDDEDDDDEDDEEEEEEEEEEPVKEAPGKRKKEMAKQKAAPEAKKQKVEGTEP		42.17,45.8,48.1,50.33,52.92,46.01,45.1,40.81,42.17,43.43,39.6,43.54,45.95,55.42,46.14,46.52,44.22,49.83,48.96,59.76,53.94,48.65,44.49,53.08,45.28,47.33,46.85,49.04,43.37,48.22,49.91,47.01,47.27,49.14,48.52,49.31,52.56,54.27,49.23,50.21,51.74,48.64,46.53,42.71,36.03,39.53,36.37,38.21,41.55,34.54,37.92,36.33,37.77,42.59,39.28,38.55,40.41,43.37,42.74,48.13,49.23,47.15,46.02,42.52,42.44,42.14,42.9,46…	42.5	KGKKAAKVVPVKAKNVAEDEDEEEDDEDEDDDDDEDDEDDDDEDDEEEEE	EEEEEPVKEAPGKRKKEMAKQKAAPEAKKQKVEGTEPTTAFNLFVGNLNF		SSSEEEEEES T
P19484	P19484_p_1_1	10	35	44	Q	P19484_1	66	1	66	0.614	0.614	QQQQQQQQQQ	HHHHHHHHTT	87.0,85.33,81.56,78.93,78.09,73.51,64.86,61.03,56.73,52.51	75.8	MASRIGLRMQLMREQAQQEEQRERMQQQAVMHYMQQQQQQQQQQLGGPPTPAINTPVHFQSPPPVP	HHHHHHHHHHHHHHHHHHHHHHHHHHHHHHHHHHHHHHHTT S	48.9,51.63,63.01,71.55,76.7,86.71,88.45,87.56,88.48,91.82,92.93,91.41,92.05,91.81,90.99,90.64,91.76,90.55,85.48,89.41,89.58,85.59,85.04,89.26,88.2,89.32,88.18,89.28,89.46,88.22,87.14,90.25,87.9,86.38,87.0,85.33,81.56,78.93,78.09,73.51,64.86,61.03,56.73,52.51,40.88,39.82,45.22,48.53,44.27,50.71,43.7,35.94,46.09,41.04,42.76,42.76,40.11,47.43,41.34,47.3,52.14,57.9,59.32,61.2,54.09,55.91	78.51	|||||||||||MASRIGLRMQLMREQAQQEEQRERMQQQAVMHYMQQQQQ	QQQQQLGGPPTPAINTPVHFQSPPPVPGEVLKVQSYLENPTSYHLQQSQH	||||||||||| HHHHHHHHHHHHHHHHHHHHHHHHHHHHHHHHHHHH	HHHTT S TTTT SS HHHHHHHHH
P19532	P19532_p_1_1	6	107	112	S	P19532_1	64	90	153	0.744	0.744	SSSSSS	SHHHH	51.55,56.13,54.83,55.75,69.15,80.78	55.94	ATLSASSSAGGSRTPAMSSSSSSRVLLRQQLMRAQAQEQERRERREQAAAAPFPSPAPASPAIS	SHHHHHHHHHHHHHHHHHHHHHHHHHHHHHHS	37.35,38.71,43.0,37.61,41.69,43.23,39.95,44.01,44.02,42.41,36.64,39.16,42.24,47.03,47.46,39.43,48.32,51.55,56.13,54.83,55.75,69.15,80.78,80.28,85.87,90.65,93.21,92.35,91.57,93.61,94.54,92.97,93.03,92.95,91.61,91.85,92.11,90.57,87.82,89.12,88.15,84.9,83.3,82.59,81.74,78.57,73.2,70.99,67.03,61.63,51.89,48.43,44.64,42.53,42.32,41.58,42.21,46.79,41.22,43.43,52.15,38.98,48.17,37.42	53.49	DPDSFYELKSQPLPLRSSLPISLQATPATPATLSASSSAGGSRTPAMSSS	SSSRVLLRQQLMRAQAQEQERRERREQAAAAPFPSPAPASPAISVVGVSA	TT SH	HHHHHHHHHHHHHHHHHHHHHHHHHHHHHS
P19544	P19544_p_1_1	9	60	68	P	P19544_1	37	48	84	0.667	0.667	PPPPPPPPP		75.76,73.44,69.38,69.61,64.63,57.25,55.19,50.54,44.11	64.63	YGSLGGPAPPPAPPPPPPPPPHSFIKQEPSWGGAEPH		49.03,39.73,41.6,53.27,43.7,61.09,60.15,60.98,70.23,71.56,72.38,74.45,75.76,73.44,69.38,69.61,64.63,57.25,55.19,50.54,44.11,45.46,35.1,33.96,36.63,38.82,34.58,33.69,40.9,33.47,36.98,33.86,28.24,34.22,32.57,38.51,34.11	44.11	AVPSLGGGGGCALPVSGAAQWAPVLDFAPPGASAYGSLGGPAPPPAPPPP	PPPPPHSFIKQEPSWGGAEPHEEQCLSAFTVHFSGQFTGTAGACRYGPFG
P20042	P20042_p_1_1	8	14	21	K	P20042_1	119	1	119	0.512	0.512	KKKKKKKK		47.12,53.44,50.37,41.69,48.5,40.37,49.34,53.32	48.92	MSGDEMIFDPTMSKKKKKKKKPFMLDEEGDTQTEETQPSETKEVEPEPTEDKDLEADEEDTRKKDASDDLDDLNFFNQKKKKKKTKKIFDIDEAEEGVKDLKIESDVQEPTEPEDDLDI	TT	43.13,45.15,42.56,49.06,47.43,58.09,50.12,40.8,48.64,55.09,53.78,50.04,52.95,47.12,53.44,50.37,41.69,48.5,40.37,49.34,53.32,39.31,44.67,41.29,54.78,44.14,41.57,41.52,38.39,36.95,33.8,39.59,32.29,39.47,38.45,35.12,38.74,36.97,38.86,38.47,32.81,41.69,34.71,45.01,37.77,39.44,45.45,36.47,42.02,36.21,42.85,42.68,38.62,48.24,39.25,39.52,42.32,43.09,39.4,41.52,40.63,40.97,41.75,39.07,36.14,42.19,39.68,4…	40.97	|||||||||||||||||||||||||||||||||MSGDEMIFDPTMSKKKK	KKKKPFMLDEEGDTQTEETQPSETKEVEPEPTEDKDLEADEEDTRKKDAS	||||||||||||||||||||||||||||||||| TT
P20042	P20042_p_2_1	6	79	84	K	P20042_1	119	1	119	0.512	0.512	KKKKKK		48.85,46.37,44.83,42.94,41.73,39.87	43.885	MSGDEMIFDPTMSKKKKKKKKPFMLDEEGDTQTEETQPSETKEVEPEPTEDKDLEADEEDTRKKDASDDLDDLNFFNQKKKKKKTKKIFDIDEAEEGVKDLKIESDVQEPTEPEDDLDI	TT	43.13,45.15,42.56,49.06,47.43,58.09,50.12,40.8,48.64,55.09,53.78,50.04,52.95,47.12,53.44,50.37,41.69,48.5,40.37,49.34,53.32,39.31,44.67,41.29,54.78,44.14,41.57,41.52,38.39,36.95,33.8,39.59,32.29,39.47,38.45,35.12,38.74,36.97,38.86,38.47,32.81,41.69,34.71,45.01,37.77,39.44,45.45,36.47,42.02,36.21,42.85,42.68,38.62,48.24,39.25,39.52,42.32,43.09,39.4,41.52,40.63,40.97,41.75,39.07,36.14,42.19,39.68,4…	40.97	QTEETQPSETKEVEPEPTEDKDLEADEEDTRKKDASDDLDDLNFFNQKKK	KKKTKKIFDIDEAEEGVKDLKIESDVQEPTEPEDDLDIMLGNKKKKKKNV
P20226	P20226_p_1_1	38	58	95	Q	P20226_2	36	36	71	0.437	0.437	QQQQQQQQQQQQQQQQQQQQQQQQQQQQQQQQQQQQQQ	HHHHHHHHHHHHHHHHHHHHHHHHHHHHHHHHHHHHHH	79.18,80.29,82.28,82.2,82.31,82.81,83.57,84.02,84.1,85.2,85.03,85.5,86.31,86.67,86.03,86.56,87.24,86.25,85.96,86.41,86.25,84.94,85.05,85.53,83.96,83.03,83.07,82.29,80.5,79.62,79.22,77.29,74.72,73.87,70.31,65.07,63.0,61.15	83.32	TGLTPQPIQNTNSLSILEEQQRQQQQQQQQQQQQQQ	SSHHHHHHHHHHHHHHHHHHHHHHH	47.88,39.26,45.44,46.06,46.91,40.55,43.01,45.9,38.42,42.15,50.05,52.06,48.44,49.63,58.82,64.26,66.68,74.82,75.37,77.05,79.36,80.37,79.18,80.29,82.28,82.2,82.31,82.81,83.57,84.02,84.1,85.2,85.03,85.5,86.31,86.67	75.095	IFSPMMPYGTGLTPQPIQNTNSLSILEEQQRQQQQQQQQQQQQQQQQQQQ	QQQQQQQQQQQQQQQQQQQAVAAAAVQQSTSQQATQGTSGQAPQLFHSQT	SSHHHHHHHHHHHHHHHHHHHHHHHHHHHH	HHHHHHHHHHHHHHHHHHHHHHHHHHTSSS
P20264	P20264_p_1_1	14	30	43	G	P20264_1	32	32	63	0.869	0.869	GGGGGGGGGGGGGG		41.57,41.12,41.17,40.71,40.76,40.87,40.21,41.45,37.98,42.15,39.66,42.36,41.01,41.68	41.065	GGGGGGGGGGGGAGGGGGGMQPGSAAVTSGAY		41.17,40.71,40.76,40.87,40.21,41.45,37.98,42.15,39.66,42.36,41.01,41.68,44.11,42.84,41.54,41.97,41.1,41.86,39.72,52.39,49.79,43.01,41.52,33.79,38.46,35.55,38.92,41.04,37.75,34.7,38.52,39.67	41.025	||||||||||||||MATAASNPYLPGNSLLAAGSIVHSDAAGAGGGGGGG	GGGGGGGAGGGGGGMQPGSAAVTSGAYRGDPSSVKMVQSDFMQGAMAASN	||||||||||||||	SS
P20264	P20264_p_2_1	6	45	50	G	P20264_1	32	32	63	0.869	0.869	GGGGGG		42.84,41.54,41.97,41.1,41.86,39.72	41.7	GGGGGGGGGGGGAGGGGGGMQPGSAAVTSGAY		41.17,40.71,40.76,40.87,40.21,41.45,37.98,42.15,39.66,42.36,41.01,41.68,44.11,42.84,41.54,41.97,41.1,41.86,39.72,52.39,49.79,43.01,41.52,33.79,38.46,35.55,38.92,41.04,37.75,34.7,38.52,39.67	41.025	|||MATAASNPYLPGNSLLAAGSIVHSDAAGAGGGGGGGGGGGGGGAGGG	GGGMQPGSAAVTSGAYRGDPSSVKMVQSDFMQGAMAASNGGHMLSHAHQW	|||	SS
P20264	P20264_p_4_1	6	139	144	P	P20264_2	69	122	190	0.662	0.662	PPPPPP		65.14,58.74,59.32,65.1,60.81,46.57	60.065	WSGSAVGMAGSPQQPPQPPPPPPQGPDVKGGAGRDDLHAGTALHHRGPPHLGPPPPPPHQGHPGGWGAA		35.66,39.07,32.18,36.52,32.66,37.89,36.06,43.27,38.52,41.31,49.62,43.96,45.08,49.69,56.57,49.38,51.29,65.14,58.74,59.32,65.1,60.81,46.57,43.35,48.03,45.27,41.35,46.15,41.47,38.38,37.34,42.3,40.1,40.0,41.7,36.17,45.65,36.93,33.42,33.94,34.23,33.86,38.09,42.22,39.66,35.36,40.34,46.76,45.76,43.08,47.3,45.61,63.06,61.51,57.44,71.09,66.1,42.61,47.52,40.75,34.38,45.0,38.29,33.58,33.77,35.6,33.24,31.78,…	41.7	SHAHQWVTALPHAAAAAAAAAAAAVEASSPWSGSAVGMAGSPQQPPQPPP	PPPQGPDVKGGAGRDDLHAGTALHHRGPPHLGPPPPPPHQGHPGGWGAAA	TT HHHHHHHHHHHHHHHTT
P20264	P20264_p_5_1	6	174	179	P	P20264_2	69	122	190	0.662	0.662	PPPPPP		63.06,61.51,57.44,71.09,66.1,42.61	62.285	WSGSAVGMAGSPQQPPQPPPPPPQGPDVKGGAGRDDLHAGTALHHRGPPHLGPPPPPPHQGHPGGWGAA		35.66,39.07,32.18,36.52,32.66,37.89,36.06,43.27,38.52,41.31,49.62,43.96,45.08,49.69,56.57,49.38,51.29,65.14,58.74,59.32,65.1,60.81,46.57,43.35,48.03,45.27,41.35,46.15,41.47,38.38,37.34,42.3,40.1,40.0,41.7,36.17,45.65,36.93,33.42,33.94,34.23,33.86,38.09,42.22,39.66,35.36,40.34,46.76,45.76,43.08,47.3,45.61,63.06,61.51,57.44,71.09,66.1,42.61,47.52,40.75,34.38,45.0,38.29,33.58,33.77,35.6,33.24,31.78,…	41.7	VGMAGSPQQPPQPPPPPPQGPDVKGGAGRDDLHAGTALHHRGPPHLGPPP	PPPHQGHPGGWGAAAAAAAAAAAAAAAAHLPSMAGGQQPPPQSLLYSQPG		SS SS SS
P20264	P20264_p_7_1	6	241	246	G	P20264_3	89	231	319	0.635	0.635	GGGGGG		38.76,37.4,37.67,36.66,35.11,35.97	37.03	NGMLSAPPGPGGGGGGAGGGAQSLVHPGLVRGDTPELAEHHHHHHHHAHPHPPHPHHAQGPPHHGGGGGGAGPGLNSHDPHSDEDTPTS	S SSTTS H	32.6,32.68,31.59,34.47,35.48,35.96,52.56,48.65,37.74,47.8,38.76,37.4,37.67,36.66,35.11,35.97,39.01,37.15,37.82,36.55,39.12,42.42,37.0,40.7,45.3,44.08,47.07,41.44,42.82,51.93,37.83,51.58,47.0,49.94,47.27,40.04,44.5,41.51,42.85,45.62,43.61,44.54,43.73,46.59,45.1,45.68,48.48,48.61,53.86,54.33,57.89,62.57,57.15,59.81,61.62,50.49,49.5,45.31,47.21,42.79,53.02,52.72,47.65,47.32,40.61,39.61,39.79,39.22,3…	45.06	AAAAAAAAAAAHLPSMAGGQQPPPQSLLYSQPGGFTVNGMLSAPPGPGGG	GGGAGGGAQSLVHPGLVRGDTPELAEHHHHHHHHAHPHPPHPHHAQGPPH	S SS SS
P20264	P20264_p_8_1	8	270	277	H	P20264_3	89	231	319	0.635	0.635	HHHHHHHH		45.62,43.61,44.54,43.73,46.59,45.1,45.68,48.48	45.36	NGMLSAPPGPGGGGGGAGGGAQSLVHPGLVRGDTPELAEHHHHHHHHAHPHPPHPHHAQGPPHHGGGGGGAGPGLNSHDPHSDEDTPTS	S SSTTS H	32.6,32.68,31.59,34.47,35.48,35.96,52.56,48.65,37.74,47.8,38.76,37.4,37.67,36.66,35.11,35.97,39.01,37.15,37.82,36.55,39.12,42.42,37.0,40.7,45.3,44.08,47.07,41.44,42.82,51.93,37.83,51.58,47.0,49.94,47.27,40.04,44.5,41.51,42.85,45.62,43.61,44.54,43.73,46.59,45.1,45.68,48.48,48.61,53.86,54.33,57.89,62.57,57.15,59.81,61.62,50.49,49.5,45.31,47.21,42.79,53.02,52.72,47.65,47.32,40.61,39.61,39.79,39.22,3…	45.06	QPGGFTVNGMLSAPPGPGGGGGGAGGGAQSLVHPGLVRGDTPELAEHHHH	HHHHAHPHPPHPHHAQGPPHHGGGGGGAGPGLNSHDPHSDEDTPTSDDLE		S SSTTS HHHHH
P20264	P20264_p_9_1	6	295	300	G	P20264_3	89	231	319	0.635	0.635	GGGGGG		40.61,39.61,39.79,39.22,38.82,40.78	39.7	NGMLSAPPGPGGGGGGAGGGAQSLVHPGLVRGDTPELAEHHHHHHHHAHPHPPHPHHAQGPPHHGGGGGGAGPGLNSHDPHSDEDTPTS	S SSTTS H	32.6,32.68,31.59,34.47,35.48,35.96,52.56,48.65,37.74,47.8,38.76,37.4,37.67,36.66,35.11,35.97,39.01,37.15,37.82,36.55,39.12,42.42,37.0,40.7,45.3,44.08,47.07,41.44,42.82,51.93,37.83,51.58,47.0,49.94,47.27,40.04,44.5,41.51,42.85,45.62,43.61,44.54,43.73,46.59,45.1,45.68,48.48,48.61,53.86,54.33,57.89,62.57,57.15,59.81,61.62,50.49,49.5,45.31,47.21,42.79,53.02,52.72,47.65,47.32,40.61,39.61,39.79,39.22,3…	45.06	GGGAQSLVHPGLVRGDTPELAEHHHHHHHHAHPHPPHPHHAQGPPHHGGG	GGGAGPGLNSHDPHSDEDTPTSDDLEQFAKQFKQRRIKLGFTQADVGLAL		S SSTTS HHHHHHHHHHHHHHHHHTT HHHHHHHH
P20265	P20265_p_1_1	21	68	88	G	P20265_1	108	64	171	0.588	0.588	GGGGGGGGGGGGGGGGGGGGG		35.81,33.01,36.44,36.03,38.35,38.2,38.12,39.74,39.22,40.3,41.76,44.31,40.83,41.85,38.88,41.23,39.47,39.95,39.99,37.33,40.06	39.47	ALSHGGGGGGGGGGGGGGGGGGGGGDGSPWSTSPLGQPDIKPSVVVQQGGRGDELHGPGALQQQHQQQQQQQQQQQQQQQQQQQQQRPPHLVHHAANHHPGPGAWRSA	S THHHHHHHHHHHHHHHHHHHHHHHHHHHTS	30.49,35.62,34.75,37.42,35.81,33.01,36.44,36.03,38.35,38.2,38.12,39.74,39.22,40.3,41.76,44.31,40.83,41.85,38.88,41.23,39.47,39.95,39.99,37.33,40.06,41.5,37.68,37.28,47.17,41.8,34.49,37.06,35.03,38.24,39.77,36.41,35.79,39.5,33.15,44.38,41.08,43.43,35.07,41.51,39.2,37.11,40.39,37.8,37.11,36.95,38.02,42.54,38.12,45.16,46.6,53.56,52.17,58.37,58.34,68.63,71.88,79.95,81.43,82.46,84.15,86.29,86.99,87.37…	42.085	QQGAGGYREAQSLVQGDYGALQSNGHPLSHAHQWITALSHGGGGGGGGGG	GGGGGGGGGGGDGSPWSTSPLGQPDIKPSVVVQQGGRGDELHGPGALQQQ	S S S	THHHHHH
P20265	P20265_p_2_1	21	129	149	Q	P20265_1	108	64	171	0.588	0.588	QQQQQQQQQQQQQQQQQQQQQ	HHHHHHHHHHHHHHHHHHHHT	86.29,86.99,87.37,88.24,89.09,90.02,88.35,88.66,89.84,88.25,87.98,87.42,87.58,85.38,83.66,82.58,81.4,77.54,71.64,67.32,62.3	87.37	ALSHGGGGGGGGGGGGGGGGGGGGGDGSPWSTSPLGQPDIKPSVVVQQGGRGDELHGPGALQQQHQQQQQQQQQQQQQQQQQQQQQRPPHLVHHAANHHPGPGAWRSA	S THHHHHHHHHHHHHHHHHHHHHHHHHHHTS	30.49,35.62,34.75,37.42,35.81,33.01,36.44,36.03,38.35,38.2,38.12,39.74,39.22,40.3,41.76,44.31,40.83,41.85,38.88,41.23,39.47,39.95,39.99,37.33,40.06,41.5,37.68,37.28,47.17,41.8,34.49,37.06,35.03,38.24,39.77,36.41,35.79,39.5,33.15,44.38,41.08,43.43,35.07,41.51,39.2,37.11,40.39,37.8,37.11,36.95,38.02,42.54,38.12,45.16,46.6,53.56,52.17,58.37,58.34,68.63,71.88,79.95,81.43,82.46,84.15,86.29,86.99,87.37…	42.085	DGSPWSTSPLGQPDIKPSVVVQQGGRGDELHGPGALQQQHQQQQQQQQQQ	QQQQQQQQQQQRPPHLVHHAANHHPGPGAWRSAAAAAHLPPSMGASNGGL	THHHHHHHHHHHHHHHHH	HHHHHHHHHHTS
P20265	P20265_p_3_1	7	239	245	P	P20265_2	67	201	267	0.494	0.494	PPPPPPP		73.27,75.23,76.18,78.63,76.01,74.15,70.65	75.23	LGAGGQPAGLHHHGLRDAHDEPHHADHHPHPHSHPHQQPPPPPPPQGPPGHPGAHHDPHSDEDTPTS	S TTS H	36.93,34.58,35.42,33.12,37.21,43.47,45.1,41.4,32.73,41.94,36.18,43.69,39.26,33.59,43.03,34.9,39.12,41.26,47.69,42.72,43.34,45.86,50.67,47.97,45.59,49.48,50.87,55.27,54.23,56.8,46.91,50.45,52.03,55.39,53.62,54.9,51.26,57.32,73.27,75.23,76.18,78.63,76.01,74.15,70.65,60.57,61.54,67.89,49.54,48.31,51.22,46.45,43.83,43.68,49.7,48.47,43.67,47.05,42.55,41.32,49.43,51.88,64.6,70.26,76.07,88.41,89.34	48.47	QPSFTVNGMLGAGGQPAGLHHHGLRDAHDEPHHADHHPHPHSHPHQQPPP	PPPPQGPPGHPGAHHDPHSDEDTPTSDDLEQFAKQFKQRRIKLGFTQADV		S TTS HHHHHHHHHHHHHHHHHTT HHHH
P20333	P20333_p_1_1	6	325	330	S	P20333_2	57	321	377	0.716	0.716	SSSSSS		33.99,39.97,42.19,39.01,42.47,38.85	39.49	ITAPSSSSSSLESSASALDRRAPTRNQPQAPGVEASGAGEARASTGSSDSSPGGHGT		39.94,38.49,40.61,40.56,33.99,39.97,42.19,39.01,42.47,38.85,44.32,41.08,42.62,41.06,43.79,43.99,40.62,44.96,40.76,43.94,41.52,43.34,47.94,40.25,41.13,40.96,39.99,41.97,40.14,48.17,45.3,42.76,40.34,40.72,39.17,37.72,43.68,39.6,41.42,42.79,41.09,42.25,43.48,39.56,46.15,40.7,39.68,42.25,36.19,42.05,45.36,46.4,38.61,43.59,47.86,42.38,56.19	41.42	VVNCVIMTQVKKKPLCLQREAKVPHLPADKARGTQGPEQQHLLITAPSSS	SSSLESSASALDRRAPTRNQPQAPGVEASGAGEARASTGSSDSSPGGHGT	HHHHHHHHHHTT
P20393	P20393_p_1_1	12	82	93	S	P20393_1	119	1	119	0.736	0.736	SSSSSSSSSSSS		43.34,43.68,48.32,41.39,47.08,41.04,46.8,40.12,48.31,42.95,45.32,40.05	43.51	MTTLDSNNNTGGVITYIGSSGSSPSRTSPESLYSDNSNGSFQSLTQGCPTYFPPSPTGSLTQDPARSFGSIPPSLSDDGSPSSSSSSSSSSSSFYNGSPPGSLQVAMEDSSRVSPSKST		27.88,31.19,26.94,32.24,27.82,35.96,28.79,31.94,30.29,27.81,28.81,29.09,32.07,37.65,31.17,31.46,33.04,28.83,32.15,29.86,35.23,34.44,29.28,37.59,36.28,30.87,40.15,34.83,38.62,38.58,34.09,39.32,36.38,37.96,37.62,37.5,40.1,40.19,40.41,40.43,38.86,41.47,37.55,35.75,36.84,39.35,38.35,32.72,38.51,35.4,36.14,36.52,56.81,41.6,34.32,52.22,38.76,37.59,36.61,37.1,37.14,38.03,37.86,45.88,43.88,39.29,41.58,43…	38.58	NGSFQSLTQGCPTYFPPSPTGSLTQDPARSFGSIPPSLSDDGSPSSSSSS	SSSSSSFYNGSPPGSLQVAMEDSSRVSPSKSTSNITKLNGMVLLCKVCGD		TT STT B TTTSS
P20396	P20396_p_1_1	6	90	95	E	P20396_1	143	63	205	0.463	0.463	EEEEEE		52.47,45.31,45.67,42.67,41.72,36.36	43.99	QGDQGEHSASQIFQSDWLSKRQHPGKREEEEEEGVEEEEEEEGGAVGPHKRQHPGRREDEASWSVDVTQHKRQHPGRRSPWLAYAVPKRQHPGRRLADPKAQRSWEEEEEEEEREEDLMPEKRQHPGKRALGGPCGPQGAYGQ	HHHHTTGGGTHHHHHGGGGGG S GGG SS TT HHHHHHHHHHHHHHHHHTTS S S	73.53,66.51,56.74,53.36,50.28,50.83,49.12,51.53,49.36,52.17,51.6,53.3,54.72,56.0,55.66,54.78,56.72,57.29,59.3,60.17,56.81,67.35,49.87,63.52,56.37,51.28,57.52,52.47,45.31,45.67,42.67,41.72,36.36,38.61,40.44,33.46,42.09,33.41,35.3,41.64,38.37,42.91,40.31,38.06,52.78,55.83,55.06,61.15,56.54,70.26,66.92,74.81,62.79,70.22,61.38,65.04,66.41,53.94,52.41,50.59,49.19,48.71,40.98,42.14,48.3,44.71,51.37,50.…	54.72	DDFLRQVERLLFLRENIQRLQGDQGEHSASQIFQSDWLSKRQHPGKREEE	EEEGVEEEEEEEGGAVGPHKRQHPGRREDEASWSVDVTQHKRQHPGRRSP	HHHHHHHHHHHHHHHHHHHHHHHHTTGGGTHHHHHGGGGGG	S G
P20396	P20396_p_2_1	7	98	104	E	P20396_1	143	63	205	0.463	0.463	EEEEEEE		33.46,42.09,33.41,35.3,41.64,38.37,42.91	38.37	QGDQGEHSASQIFQSDWLSKRQHPGKREEEEEEGVEEEEEEEGGAVGPHKRQHPGRREDEASWSVDVTQHKRQHPGRRSPWLAYAVPKRQHPGRRLADPKAQRSWEEEEEEEEREEDLMPEKRQHPGKRALGGPCGPQGAYGQ	HHHHTTGGGTHHHHHGGGGGG S GGG SS TT HHHHHHHHHHHHHHHHHTTS S S	73.53,66.51,56.74,53.36,50.28,50.83,49.12,51.53,49.36,52.17,51.6,53.3,54.72,56.0,55.66,54.78,56.72,57.29,59.3,60.17,56.81,67.35,49.87,63.52,56.37,51.28,57.52,52.47,45.31,45.67,42.67,41.72,36.36,38.61,40.44,33.46,42.09,33.41,35.3,41.64,38.37,42.91,40.31,38.06,52.78,55.83,55.06,61.15,56.54,70.26,66.92,74.81,62.79,70.22,61.38,65.04,66.41,53.94,52.41,50.59,49.19,48.71,40.98,42.14,48.3,44.71,51.37,50.…	54.72	RLLFLRENIQRLQGDQGEHSASQIFQSDWLSKRQHPGKREEEEEEGVEEE	EEEEGGAVGPHKRQHPGRREDEASWSVDVTQHKRQHPGRRSPWLAYAVPK	HHHHHHHHHHHHHHHHTTGGGTHHHHHGGGGGG	S GGG S
P20396	P20396_p_3_1	8	168	175	E	P20396_1	143	63	205	0.463	0.463	EEEEEEEE	HHHHHHHH	55.23,55.94,54.92,54.0,54.09,54.09,52.94,52.31	54.09	QGDQGEHSASQIFQSDWLSKRQHPGKREEEEEEGVEEEEEEEGGAVGPHKRQHPGRREDEASWSVDVTQHKRQHPGRRSPWLAYAVPKRQHPGRRLADPKAQRSWEEEEEEEEREEDLMPEKRQHPGKRALGGPCGPQGAYGQ	HHHHTTGGGTHHHHHGGGGGG S GGG SS TT HHHHHHHHHHHHHHHHHTTS S S	73.53,66.51,56.74,53.36,50.28,50.83,49.12,51.53,49.36,52.17,51.6,53.3,54.72,56.0,55.66,54.78,56.72,57.29,59.3,60.17,56.81,67.35,49.87,63.52,56.37,51.28,57.52,52.47,45.31,45.67,42.67,41.72,36.36,38.61,40.44,33.46,42.09,33.41,35.3,41.64,38.37,42.91,40.31,38.06,52.78,55.83,55.06,61.15,56.54,70.26,66.92,74.81,62.79,70.22,61.38,65.04,66.41,53.94,52.41,50.59,49.19,48.71,40.98,42.14,48.3,44.71,51.37,50.…	54.72	EASWSVDVTQHKRQHPGRRSPWLAYAVPKRQHPGRRLADPKAQRSWEEEE	EEEEREEDLMPEKRQHPGKRALGGPCGPQGAYGQAGLLLGLLDDLSRSQG	S GGG SS TT HHHHHHHHHHH	HHHHHHTTS S SHHHHHHHHHHHHHHTT
P20585	P20585_p_1_1	12	51	62	A	P20585_1	92	31	122	0.729	0.729	AAAAAAAAAAAA		37.5,36.85,37.85,37.59,37.85,38.14,38.2,38.41,38.75,40.55,39.83,45.83	38.17	TGSLKSTSSSTGAADQVDPGAAAAAAAAAAAAPPAPPAPAFPPQLPPHIATEIDRRKKRPLENDGPVKKKVKKVQQKEGGSDLGMSGNSEPK		33.9,32.28,28.78,34.44,32.32,29.54,32.13,30.95,33.82,31.57,35.75,34.19,36.84,35.5,38.67,39.73,35.11,38.94,39.57,35.43,37.5,36.85,37.85,37.59,37.85,38.14,38.2,38.41,38.75,40.55,39.83,45.83,47.39,49.12,40.0,45.7,41.95,38.25,39.46,32.46,34.88,39.5,47.43,34.43,32.28,38.53,33.38,29.67,32.27,31.43,31.9,31.58,34.98,30.4,34.47,32.99,33.97,32.3,31.74,32.43,34.52,30.11,34.48,33.63,31.38,37.97,32.94,31.89,3…	34.08	ASGGLAASSSAPARQAVLSRFFQSTGSLKSTSSSTGAADQVDPGAAAAAA	AAAAAAPPAPPAPAFPPQLPPHIATEIDRRKKRPLENDGPVKKKVKKVQQ
P20962	P20962_p_1_1	6	46	51	E	P20962_1	102	1	102	0.42	0.42	EEEEEE	SSSSS	50.39,46.34,53.19,48.58,43.69,46.43	47.505	MSEKSVEAAAELSAKDLKEKKEKVEEKASRKERKKEVVEEEENGAEEEEEETAEDGEEEDEGEEEDEEEEEEDDEGPALKRAAEEEDEADPKRQKTENGASA	HHHHHHHHHHHHHHHHHHHHHHHHHHHHHHHHHHHHHHHHHTTSSSSS S SGGGSSS GGG	59.62,65.1,61.92,65.46,69.08,73.27,68.93,75.23,73.51,76.53,73.04,78.85,80.31,81.6,84.69,85.09,77.92,85.13,82.05,77.47,82.52,79.39,78.73,77.17,75.31,68.74,73.35,69.35,64.7,69.28,67.46,63.14,59.01,64.65,66.46,60.73,58.85,61.83,58.1,55.42,56.33,54.46,59.22,59.6,60.67,50.39,46.34,53.19,48.58,43.69,46.43,47.39,58.18,46.74,55.08,49.61,49.5,53.31,49.96,66.18,54.32,57.0,52.19,44.48,45.98,52.7,51.79,47.39…	60.61	||MSEKSVEAAAELSAKDLKEKKEKVEEKASRKERKKEVVEEEENGAEEE	EEETAEDGEEEDEGEEEDEEEEEEDDEGPALKRAAEEEDEADPKRQKTEN	|| HHHHHHHHHHHHHHHHHHHHHHHHHHHHHHHHHHHHHHHHHTTSSS	SS S SGGGSSS GGG
P20962	P20962_p_2_1	6	67	72	E	P20962_1	102	1	102	0.42	0.42	EEEEEE		51.79,47.39,41.42,44.97,47.02,53.75	47.205	MSEKSVEAAAELSAKDLKEKKEKVEEKASRKERKKEVVEEEENGAEEEEEETAEDGEEEDEGEEEDEEEEEEDDEGPALKRAAEEEDEADPKRQKTENGASA	HHHHHHHHHHHHHHHHHHHHHHHHHHHHHHHHHHHHHHHHHTTSSSSS S SGGGSSS GGG	59.62,65.1,61.92,65.46,69.08,73.27,68.93,75.23,73.51,76.53,73.04,78.85,80.31,81.6,84.69,85.09,77.92,85.13,82.05,77.47,82.52,79.39,78.73,77.17,75.31,68.74,73.35,69.35,64.7,69.28,67.46,63.14,59.01,64.65,66.46,60.73,58.85,61.83,58.1,55.42,56.33,54.46,59.22,59.6,60.67,50.39,46.34,53.19,48.58,43.69,46.43,47.39,58.18,46.74,55.08,49.61,49.5,53.31,49.96,66.18,54.32,57.0,52.19,44.48,45.98,52.7,51.79,47.39…	60.61	KKEKVEEKASRKERKKEVVEEEENGAEEEEEETAEDGEEEDEGEEEDEEE	EEEDDEGPALKRAAEEEDEADPKRQKTENGASA|||||||||||||||||	HHHHHHHHHHHHHHHHHHHHHHHHTTSSSSS S	SGGGSSS GGG |||||||||||||||||
P21127	P21127_p_1_1	13	304	316	E	P21127_1	396	17	412	0.375	0.375	EEEEEEEEEEEEE		38.37,31.38,38.15,33.35,33.28,34.87,29.87,36.25,29.86,37.81,31.64,37.71,31.78	33.35	LQEKKRRKEQEEKAEIKRLKNSDDRDSKRDSLEEGELRDHRMEITIRNSPYRREDSMEDRGEEDDSLAIKPPQQMSRKEKAHHRKDEKRKEKRRHRSHSAEGGKHARVKEKEREHERRKRHREEQDKARREWERQKRREMAREHSRRERDRLEQLERKRERERKMREQQKEQREQKERERRAEERRKEREARREVSAHHRTMREDYSDKVKASHWSRSPPRPPRERFELGDGRKPGEARPAPAQKPAQLKEEKMEERDLLSDLQDISDSERKTSSAESSSAESGSGSEEEEEEEEEEEEEGSTSEESEEEEEEEEEEEEETGSNSEEASEQSAEEVSEEEMSEDEERENENHLLVVPESRFDRDSGESEEAEEEVGEGTPQSSALTEGDYVPDSPA	HHHHHHHHHHHHHHHHHHHHHHHHHHTTS SS SSSSSHHHHHTTSSSS SS TTHHHHHHHHHHHHHHHHHHHHHHHHHHHHHHHHHHHHHHHHHHHHHHHHHHHHHHHHHHHHHHHHHHHHHHHHHHHHHHHHHHHHHHHHHHHHHHHHHHHHHHHTTSSS	82.81,82.6,83.84,82.89,88.35,86.84,83.77,85.56,85.7,82.73,82.43,83.38,83.88,81.04,79.75,78.56,77.08,71.81,68.29,66.93,59.57,53.36,51.11,51.81,46.51,43.08,43.48,45.0,35.96,36.09,36.53,40.44,37.82,37.03,36.32,36.53,37.51,34.83,34.6,35.46,31.06,27.9,32.17,29.3,26.88,30.32,27.58,29.62,37.97,38.9,32.99,28.98,30.19,30.16,32.32,33.78,29.93,34.7,36.46,35.15,32.23,37.06,35.4,38.49,37.42,34.99,36.88,33.12,…	38.63	QKPAQLKEEKMEERDLLSDLQDISDSERKTSSAESSSAESGSGSEEEEEE	EEEEEEEGSTSEESEEEEEEEEEEEEETGSNSEEASEQSAEEVSEEEMSE
P21127	P21127_p_2_1	13	324	336	E	P21127_1	396	17	412	0.375	0.375	EEEEEEEEEEEEE		32.13,35.57,29.6,29.93,29.31,32.0,29.21,29.78,30.06,30.16,31.28,31.04,36.55	30.16	LQEKKRRKEQEEKAEIKRLKNSDDRDSKRDSLEEGELRDHRMEITIRNSPYRREDSMEDRGEEDDSLAIKPPQQMSRKEKAHHRKDEKRKEKRRHRSHSAEGGKHARVKEKEREHERRKRHREEQDKARREWERQKRREMAREHSRRERDRLEQLERKRERERKMREQQKEQREQKERERRAEERRKEREARREVSAHHRTMREDYSDKVKASHWSRSPPRPPRERFELGDGRKPGEARPAPAQKPAQLKEEKMEERDLLSDLQDISDSERKTSSAESSSAESGSGSEEEEEEEEEEEEEGSTSEESEEEEEEEEEEEEETGSNSEEASEQSAEEVSEEEMSEDEERENENHLLVVPESRFDRDSGESEEAEEEVGEGTPQSSALTEGDYVPDSPA	HHHHHHHHHHHHHHHHHHHHHHHHHHTTS SS SSSSSHHHHHTTSSSS SS TTHHHHHHHHHHHHHHHHHHHHHHHHHHHHHHHHHHHHHHHHHHHHHHHHHHHHHHHHHHHHHHHHHHHHHHHHHHHHHHHHHHHHHHHHHHHHHHHHHHHHHHHTTSSS	82.81,82.6,83.84,82.89,88.35,86.84,83.77,85.56,85.7,82.73,82.43,83.38,83.88,81.04,79.75,78.56,77.08,71.81,68.29,66.93,59.57,53.36,51.11,51.81,46.51,43.08,43.48,45.0,35.96,36.09,36.53,40.44,37.82,37.03,36.32,36.53,37.51,34.83,34.6,35.46,31.06,27.9,32.17,29.3,26.88,30.32,27.58,29.62,37.97,38.9,32.99,28.98,30.19,30.16,32.32,33.78,29.93,34.7,36.46,35.15,32.23,37.06,35.4,38.49,37.42,34.99,36.88,33.12,…	38.63	QDISDSERKTSSAESSSAESGSGSEEEEEEEEEEEEEGSTSEESEEEEEE	EEEEEEETGSNSEEASEQSAEEVSEEEMSEDEERENENHLLVVPESRFDR
P21675	P21675_p_1_1	7	157	163	P	P21675_1	56	149	204	0.575	0.575	PPPPPPP		44.72,35.18,40.64,35.04,33.41,41.4,33.45	35.18	EDIDCKLMPPPPPPPGPMKKDKDQDSITGEKVDFSSSSDSESEMGPQEATQAESED		33.54,34.6,29.32,38.28,34.82,32.6,32.34,37.54,44.72,35.18,40.64,35.04,33.41,41.4,33.45,34.98,34.97,27.19,28.07,29.65,31.13,31.17,28.29,25.03,23.07,23.07,24.75,24.23,26.32,27.11,34.47,28.79,37.14,28.53,29.58,27.16,23.11,27.9,25.88,28.36,23.25,22.25,22.78,25.55,33.93,36.42,33.24,36.11,35.72,34.54,32.77,31.47,28.18,31.17,31.54,32.98	31.32	YSDINEVAEDESRRYQQTMGSLQPLCHSDYDEDDYDADCEDIDCKLMPPP	PPPPGPMKKDKDQDSITGEKVDFSSSSDSESEMGPQEATQAESEDGKLTL	SSHHHHHHHHHHHSS
P21815	P21815_p_1_1	8	76	83	E	P21815_1	197	58	254	0.521	0.521	EEEEEEEE		44.09,45.62,44.13,39.67,41.52,41.31,42.63,43.44	43.035	FPVQGSSDSSEENGDDSSEEEEEEEETSNEGENNEESNEDEDSEAENTTLSATTLGYGEDATPGTGYTGLAAIQLPKKAGDITNKATKEKESDEEEEEEEEGNENEESEAEVDENEQGINGTSTNSTEAENGNGSSGGDNGEEGEEESVTGANAEDTTETGRQGKGTSKTTTSPNGGFEPTTPPQVYRTTSPPFGKT		54.04,49.29,50.06,42.76,45.03,35.23,45.84,49.8,39.83,52.63,49.28,51.47,52.56,50.54,49.23,53.92,50.28,42.97,44.09,45.62,44.13,39.67,41.52,41.31,42.63,43.44,39.78,45.38,44.06,49.08,48.12,48.09,43.51,50.07,43.73,47.33,46.45,48.79,44.89,50.73,49.93,48.43,51.77,46.79,39.76,42.87,44.13,44.02,42.31,45.19,39.53,45.25,45.3,54.16,40.35,44.52,36.92,42.19,37.27,40.64,39.32,43.76,42.92,37.83,36.17,37.96,45.12…	45.3	DSEENGVFKYRPRYYLYKHAYFYPHLKRFPVQGSSDSSEENGDDSSEEEE	EEEETSNEGENNEESNEDEDSEAENTTLSATTLGYGEDATPGTGYTGLAA	TT TTS SSSHHHHHSSS
P21815	P21815_p_2_1	8	151	158	E	P21815_1	197	58	254	0.521	0.521	EEEEEEEE		43.98,43.16,42.74,42.07,44.13,41.94,47.19,43.51	43.335	FPVQGSSDSSEENGDDSSEEEEEEEETSNEGENNEESNEDEDSEAENTTLSATTLGYGEDATPGTGYTGLAAIQLPKKAGDITNKATKEKESDEEEEEEEEGNENEESEAEVDENEQGINGTSTNSTEAENGNGSSGGDNGEEGEEESVTGANAEDTTETGRQGKGTSKTTTSPNGGFEPTTPPQVYRTTSPPFGKT		54.04,49.29,50.06,42.76,45.03,35.23,45.84,49.8,39.83,52.63,49.28,51.47,52.56,50.54,49.23,53.92,50.28,42.97,44.09,45.62,44.13,39.67,41.52,41.31,42.63,43.44,39.78,45.38,44.06,49.08,48.12,48.09,43.51,50.07,43.73,47.33,46.45,48.79,44.89,50.73,49.93,48.43,51.77,46.79,39.76,42.87,44.13,44.02,42.31,45.19,39.53,45.25,45.3,54.16,40.35,44.52,36.92,42.19,37.27,40.64,39.32,43.76,42.92,37.83,36.17,37.96,45.12…	45.3	TTLSATTLGYGEDATPGTGYTGLAAIQLPKKAGDITNKATKEKESDEEEE	EEEEGNENEESEAEVDENEQGINGTSTNSTEAENGNGSSGGDNGEEGEEE
P22004	P22004_p_2_1	6	113	118	Q	P22004_2	43	89	131	0.473	0.473	QQQQQQ	HHHTTT	49.33,50.79,51.83,49.54,50.7,44.75	50.12	LPHRPRPLHGLQQPQPPALRQQEEQQQQQQLPRGEPPPGRLKS	SS TT HHHHHHHHHHHTTT TT TT H	85.1,83.38,87.4,88.21,87.06,83.79,73.98,64.97,59.08,55.02,57.67,50.81,47.49,43.55,39.64,45.28,53.74,53.75,50.97,49.76,51.44,51.17,50.93,50.12,49.33,50.79,51.83,49.54,50.7,44.75,46.14,44.47,48.43,52.59,59.69,57.29,59.06,54.6,57.81,67.54,75.89,85.59,89.3	53.74	FLYRRLKTQEKREMQKEILSVLGLPHRPRPLHGLQQPQPPALRQQEEQQQ	QQQLPRGEPPPGRLKSAPLFMLDLYNALSADNDEDGASEGERQQSWPHEA	HHHHHHHHHHHHHHTT SS TT HHHHHHHHHHH	TTT TT TT HHHHHHHHHHHHHHHHHHHTTS S
P22087	P22087_p_1_1	13	46	58	G	P22087_1	87	1	87	0.617	0.617	GGGGGGGGGGGGG		42.48,40.83,39.11,38.19,40.71,38.74,37.44,39.2,37.03,36.67,37.14,38.23,37.97	38.23	MKPGFSPRGGGFGGRGGFGDRGGRGGRGGFGGGRGRGGGFRGRGRGGGGGGGGGGGGGRGGGGFHSGGNRGRGRGGKRGNQSGKNVM	E	38.6,43.84,51.81,41.83,49.01,47.77,60.7,42.35,35.93,42.83,34.77,41.74,39.27,40.2,39.17,37.68,39.38,41.14,39.36,39.24,40.92,38.44,40.21,41.16,37.95,40.11,40.47,37.59,40.32,39.09,40.6,39.69,41.5,37.22,41.87,41.2,37.96,38.56,36.92,42.4,39.7,43.44,39.63,42.83,39.71,42.48,40.83,39.11,38.19,40.71,38.74,37.44,39.2,37.03,36.67,37.14,38.23,37.97,40.23,38.16,40.14,36.58,36.86,39.1,37.9,42.5,39.24,38.9,38.7…	39.63	KPGFSPRGGGFGGRGGFGDRGGRGGRGGFGGGRGRGGGFRGRGRGGGGGG	GGGGGGGRGGGGFHSGGNRGRGRGGKRGNQSGKNVMVEPHRHEGVFICRG		EEEE SSTTEEEEES
P22459	P22459_p_1_1	6	38	43	A	P22459_1	128	24	151	0.534	0.534	AAAAAA	HHHHHH	71.9,70.98,61.39,68.35,68.48,64.13	68.415	QARARERERLAHSRAAAAAAVAAATAAVEGSGGSGGGSHHHHQSRGACTSHDPQSSRGSRRRRRQRSEKKKAHYRQSSFPHCSDLMPSGSEEKILRELSEEEEDEEEEEEEEEEGRFYYSEDDHGDEC	HHHHHHHHHHHHHHHHHHHHHHHHHHHHHTTS TTHHHHHHHHHHHHHHHHHHHHHHHHHHHHHTTS	54.58,54.95,57.69,63.24,68.96,69.01,71.89,73.64,74.06,74.16,71.73,74.57,68.4,72.92,71.9,70.98,61.39,68.35,68.48,64.13,64.12,66.71,64.99,56.88,61.28,63.3,54.36,54.17,52.63,46.76,44.78,40.3,36.06,36.44,37.54,36.92,37.82,37.24,40.23,40.65,38.37,41.52,39.04,36.06,38.34,38.21,38.2,34.19,39.02,35.49,40.97,35.34,42.38,36.11,32.71,37.84,33.13,37.05,30.85,35.61,29.5,36.48,33.46,29.2,33.21,28.09,32.75,28.7…	40.635	||||||||||MEVAMVSAESSGCNSHMPYGYAAQARARERERLAHSRAAA	AAAVAAATAAVEGSGGSGGGSHHHHQSRGACTSHDPQSSRGSRRRRRQRS	|||||||||| GGGSTTS S THHHHHHHHHHHHHHHHHHHHH	HHHHHHHHHHHHTTS
P22459	P22459_p_2_1	10	128	137	E	P22459_1	128	24	151	0.534	0.534	EEEEEEEEEE	HHHHHHHHHH	62.11,64.22,60.39,59.05,55.57,53.4,50.65,50.92,47.58,43.62	54.485	QARARERERLAHSRAAAAAAVAAATAAVEGSGGSGGGSHHHHQSRGACTSHDPQSSRGSRRRRRQRSEKKKAHYRQSSFPHCSDLMPSGSEEKILRELSEEEEDEEEEEEEEEEGRFYYSEDDHGDEC	HHHHHHHHHHHHHHHHHHHHHHHHHHHHHTTS TTHHHHHHHHHHHHHHHHHHHHHHHHHHHHHTTS	54.58,54.95,57.69,63.24,68.96,69.01,71.89,73.64,74.06,74.16,71.73,74.57,68.4,72.92,71.9,70.98,61.39,68.35,68.48,64.13,64.12,66.71,64.99,56.88,61.28,63.3,54.36,54.17,52.63,46.76,44.78,40.3,36.06,36.44,37.54,36.92,37.82,37.24,40.23,40.65,38.37,41.52,39.04,36.06,38.34,38.21,38.2,34.19,39.02,35.49,40.97,35.34,42.38,36.11,32.71,37.84,33.13,37.05,30.85,35.61,29.5,36.48,33.46,29.2,33.21,28.09,32.75,28.7…	40.635	RRRRRQRSEKKKAHYRQSSFPHCSDLMPSGSEEKILRELSEEEEDEEEEE	EEEEEGRFYYSEDDHGDECSYTDLLPQDEGGGGYSSVRYSDCCERVVINV	TTHHHHHHHHHHHHHHHHHHHH	HHHHHHHHHTTS GGG EEEEEE
P22670	P22670_p_1_1	7	29	35	P	P22670_1	136	1	136	0.727	0.727	PPPPPPP		58.37,64.49,69.92,63.8,69.42,65.29,50.01	64.49	MATQAYTELQAAPPPSQPPQAPPQAQPQPPPPPPPAAPQPPQPPTAAATPQPQYVTELQSPQPQAQPPGGQKQYVTELPAVPAPSQPTGAPTPSPAPQQYIVVTVSEGAMRASETVSEASPGSTASQTGVPTQVVQ	S	30.6,34.1,37.26,37.47,39.21,36.21,38.48,37.41,37.18,38.25,39.76,42.9,39.8,46.4,44.99,43.42,43.6,44.22,49.18,42.1,38.64,47.99,40.88,45.6,43.24,38.75,58.99,51.55,58.37,64.49,69.92,63.8,69.42,65.29,50.01,40.57,50.14,47.24,42.56,53.71,39.68,41.95,40.29,36.42,39.85,35.8,37.23,34.46,36.1,34.2,25.37,40.83,27.48,32.9,31.03,30.09,28.89,32.23,30.68,28.1,34.04,26.3,35.03,31.05,31.58,29.42,36.26,35.44,29.92,…	33.005	|||||||||||||||||||MATQAYTELQAAPPPSQPPQAPPQAQPQPPP	PPPPAAPQPPQPPTAAATPQPQYVTELQSPQPQAQPPGGQKQYVTELPAV	|||||||||||||||||||
P22670	P22670_p_2_1	14	386	399	G	P22670_3	36	370	405	0.782	0.782	GGGGGGGGGGGGGG		35.21,35.58,36.8,36.31,38.04,38.87,41.43,40.03,36.54,35.83,37.57,36.17,36.13,36.76	36.65	TSTGAGASNSSGGGGSGGGGGGGGGGGGGGSGSTGG		35.35,34.53,33.47,31.31,31.69,30.67,32.44,35.08,34.57,37.85,37.68,36.51,36.17,36.42,37.0,37.18,35.21,35.58,36.8,36.31,38.04,38.87,41.43,40.03,36.54,35.83,37.57,36.17,36.13,36.76,36.68,36.98,34.78,32.7,31.38,31.14	36.17	TPATSQAVASSGSMPMYVSGSQVVASSTSTGAGASNSSGGGGSGGGGGGG	GGGGGGGSGSTGGGGSGAGTYVIQGGYMLGSASQSYSHTTRASPATVQWL		SS S HHHHHHH
P22670	P22670_p_3_1	8	925	932	E	P22670_4	46	915	960	0.593	0.593	EEEEEEEE	HHHHHHHH	45.84,44.98,45.98,44.04,42.01,46.5,46.74,43.96	45.41	SLNPLDPDKDEEEEEEEESEDELPQDISLAAGGESPALGPETLEPP	HTS TTHHHHHHHHHT TT	34.45,37.01,33.63,31.12,35.88,37.78,42.06,47.04,45.92,46.33,45.84,44.98,45.98,44.04,42.01,46.5,46.74,43.96,46.41,45.28,43.87,40.27,38.92,40.88,34.39,38.13,35.77,32.32,37.73,32.22,34.59,27.62,31.42,31.02,32.79,35.62,31.28,37.31,34.34,36.59,37.59,34.49,37.65,34.55,34.11,51.08	37.62	RLLYDEYMYYLIEHRVAQAKGETPIAVMGEFANLATSLNPLDPDKDEEEE	EEEESEDELPQDISLAAGGESPALGPETLEPPAKLARTDARGLFVQALPS	HHHHHHHHHHHHHHHHHHHHTS HHHHHHHHHHHHHHTS TTHHHHH	HHHHT TT
P22681	P22681_p_2_1	6	543	548	P	P22681_4	149	519	667	0.705	0.705	PPPPPP		48.89,56.72,54.25,49.07,56.14,64.19	55.195	ASKAASGSLHKDKPLPVPPTLRDLPPPPPPDRPYSVGAESRPQRRPLPCTPGDCPSRDKLPPVPSSRLGDSWLPRPIPKVPVSAPSSSDPWTGRELTNRHSLPFSLPSQMEPRPDVPRLGSTFSLDTSMSMNSSPLVGPECDHPKIKPS		39.41,40.36,39.1,36.5,37.94,37.14,36.96,35.6,40.61,40.37,37.18,38.92,39.81,39.35,41.46,38.19,39.89,47.13,42.41,32.94,40.38,40.21,34.48,41.39,48.89,56.72,54.25,49.07,56.14,64.19,41.52,41.68,45.39,30.94,36.61,33.65,29.7,33.09,31.18,32.44,37.16,36.73,33.76,36.52,37.42,40.74,42.58,44.24,32.63,38.78,44.44,36.17,42.33,35.53,44.17,37.74,38.38,37.02,35.08,38.73,47.86,41.61,38.34,40.28,38.95,30.49,36.54,3…	36.89	VPPRLDLLPQRVCVPSSASALGTASKAASGSLHKDKPLPVPPTLRDLPPP	PPPDRPYSVGAESRPQRRPLPCTPGDCPSRDKLPPVPSSRLGDSWLPRPI
P23246	P23246_p_1_1	6	10	15	G	P23246_1	273	1	273	0.587	0.587	GGGGGG		39.02,46.98,41.18,42.37,43.71,40.3	41.775	MSRDRFRSRGGGGGGFHRRGGGGGRGGLHDFRSPPPGMGLNQNRGPMGPGPGQSGPKPPIPPPPPHQQQQQPPPQQPPPQQPPPHQPPPHPQPHQQQQPPPPPQDSSKPVVAQGPGPAPGVGSAPPASSSAPPATPPTSGAPPGSGPGPTPTPPPAVTSAPPGAPPPTPPSSGVPTTPPQAGGPPPPPAAVPGPGPGPKQGPGPGGPKGGKMPGGPKPGGGPGLSTPGGHPKPPHRGGGEPRGGRQHHPPYHQQHHQGPPPGGPGGRSEEKIS		44.68,49.38,36.17,43.47,45.45,57.38,40.07,42.31,45.5,39.02,46.98,41.18,42.37,43.71,40.3,47.23,43.47,45.39,42.05,40.68,42.11,42.68,43.39,46.57,47.99,45.04,48.27,45.73,52.5,41.62,48.83,42.97,42.39,49.65,52.14,52.83,51.0,45.9,46.01,46.01,46.39,43.94,47.54,44.65,43.61,53.83,48.15,48.21,50.11,52.63,48.92,48.48,49.28,53.29,55.77,65.04,60.11,72.95,74.03,70.59,77.25,77.57,74.61,73.78,71.84,58.31,46.37,49…	46.3	||||||||||||||||||||||||||||||||||||||MSRDRFRSRGGG	GGGFHRRGGGGGRGGLHDFRSPPPGMGLNQNRGPMGPGPGQSGPKPPIPP	||||||||||||||||||||||||||||||||||||||
P23327	P23327_p_1_1	12	193	204	E	P23327_2	491	127	617	0.385	0.385	EEEEEEEEEEEE		47.98,49.02,49.49,47.56,48.62,49.48,48.18,49.75,48.74,49.41,48.01,42.91	48.68	HGGQARGHRGHGSEDTEDSAEHRHHLPSHRSHSHQDEDEDEVVSSEHHHHILRHGHRGHDGEDDEGEEEEEEEEEEEEASTEYGHQAHRHRGHGSEEDEDVSDGHHHHGPSHRHQGHEEDDDDDDDDDDDDDDDDVSIEYRHQAHRHQGHGIEEDEDVSDGHHHRDPSHRHRSHEEDDNDDDDVSTEYGHQAHRHQDHRKEEVEAVSGEHHHHVPDHRHQGHRDEEEDEDVSTERWHQGPQHVHHGLVDEEEEEEEITVQFGHYVASHQPRGHKSDEEDFQDEYKTEVPHHHHHRVPREEDEEVSAELGHQAPSHRQSHQDEETGHGQRGSIKEMSHHPPGHTVVKDRSHLRKDDSEEEKEKEEDPGSHEEDDESSEQGEKGTHHGSRDQEDEEDEEEG…	SSHHHHHHHHHHHHHHHHHHHHHHHHHHTT GGGG S HHHH	39.51,38.02,42.49,41.77,38.09,39.31,41.31,43.15,44.9,43.48,44.47,48.97,55.25,51.56,52.27,51.92,52.16,45.4,50.42,47.94,44.0,41.76,41.88,38.05,45.74,42.69,43.32,36.22,37.08,38.46,37.68,43.39,39.68,50.31,49.07,52.44,49.61,54.91,51.84,53.65,43.81,48.95,38.09,44.61,38.82,36.8,38.45,36.61,43.66,45.34,47.94,40.61,46.17,43.79,41.45,44.23,42.9,44.44,51.09,49.16,49.79,51.91,47.27,55.6,46.66,51.24,47.98,49.…	44.53	RHHLPSHRSHSHQDEDEDEVVSSEHHHHILRHGHRGHDGEDDEGEEEEEE	EEEEEEASTEYGHQAHRHRGHGSEEDEDVSDGHHHHGPSHRHQGHEEDDD
P23327	P23327_p_2_1	16	246	261	D	P23327_2	491	127	617	0.385	0.385	DDDDDDDDDDDDDDDD		48.67,50.07,53.57,54.31,56.56,55.17,56.59,57.94,58.83,57.77,59.04,57.94,55.01,56.51,54.37,49.56	55.84	HGGQARGHRGHGSEDTEDSAEHRHHLPSHRSHSHQDEDEDEVVSSEHHHHILRHGHRGHDGEDDEGEEEEEEEEEEEEASTEYGHQAHRHRGHGSEEDEDVSDGHHHHGPSHRHQGHEEDDDDDDDDDDDDDDDDVSIEYRHQAHRHQGHGIEEDEDVSDGHHHRDPSHRHRSHEEDDNDDDDVSTEYGHQAHRHQDHRKEEVEAVSGEHHHHVPDHRHQGHRDEEEDEDVSTERWHQGPQHVHHGLVDEEEEEEEITVQFGHYVASHQPRGHKSDEEDFQDEYKTEVPHHHHHRVPREEDEEVSAELGHQAPSHRQSHQDEETGHGQRGSIKEMSHHPPGHTVVKDRSHLRKDDSEEEKEKEEDPGSHEEDDESSEQGEKGTHHGSRDQEDEEDEEEG…	SSHHHHHHHHHHHHHHHHHHHHHHHHHHTT GGGG S HHHH	39.51,38.02,42.49,41.77,38.09,39.31,41.31,43.15,44.9,43.48,44.47,48.97,55.25,51.56,52.27,51.92,52.16,45.4,50.42,47.94,44.0,41.76,41.88,38.05,45.74,42.69,43.32,36.22,37.08,38.46,37.68,43.39,39.68,50.31,49.07,52.44,49.61,54.91,51.84,53.65,43.81,48.95,38.09,44.61,38.82,36.8,38.45,36.61,43.66,45.34,47.94,40.61,46.17,43.79,41.45,44.23,42.9,44.44,51.09,49.16,49.79,51.91,47.27,55.6,46.66,51.24,47.98,49.…	44.53	EASTEYGHQAHRHRGHGSEEDEDVSDGHHHHGPSHRHQGHEEDDDDDDDD	DDDDDDDDVSIEYRHQAHRHQGHGIEEDEDVSDGHHHRDPSHRHRSHEED
P23327	P23327_p_3_1	7	376	382	E	P23327_2	491	127	617	0.385	0.385	EEEEEEE		47.67,46.35,49.16,49.65,47.95,46.68,45.59	47.67	HGGQARGHRGHGSEDTEDSAEHRHHLPSHRSHSHQDEDEDEVVSSEHHHHILRHGHRGHDGEDDEGEEEEEEEEEEEEASTEYGHQAHRHRGHGSEEDEDVSDGHHHHGPSHRHQGHEEDDDDDDDDDDDDDDDDVSIEYRHQAHRHQGHGIEEDEDVSDGHHHRDPSHRHRSHEEDDNDDDDVSTEYGHQAHRHQDHRKEEVEAVSGEHHHHVPDHRHQGHRDEEEDEDVSTERWHQGPQHVHHGLVDEEEEEEEITVQFGHYVASHQPRGHKSDEEDFQDEYKTEVPHHHHHRVPREEDEEVSAELGHQAPSHRQSHQDEETGHGQRGSIKEMSHHPPGHTVVKDRSHLRKDDSEEEKEKEEDPGSHEEDDESSEQGEKGTHHGSRDQEDEEDEEEG…	SSHHHHHHHHHHHHHHHHHHHHHHHHHHTT GGGG S HHHH	39.51,38.02,42.49,41.77,38.09,39.31,41.31,43.15,44.9,43.48,44.47,48.97,55.25,51.56,52.27,51.92,52.16,45.4,50.42,47.94,44.0,41.76,41.88,38.05,45.74,42.69,43.32,36.22,37.08,38.46,37.68,43.39,39.68,50.31,49.07,52.44,49.61,54.91,51.84,53.65,43.81,48.95,38.09,44.61,38.82,36.8,38.45,36.61,43.66,45.34,47.94,40.61,46.17,43.79,41.45,44.23,42.9,44.44,51.09,49.16,49.79,51.91,47.27,55.6,46.66,51.24,47.98,49.…	44.53	VEAVSGEHHHHVPDHRHQGHRDEEEDEDVSTERWHQGPQHVHHGLVDEEE	EEEEITVQFGHYVASHQPRGHKSDEEDFQDEYKTEVPHHHHHRVPREEDE
P23327	P23327_p_4_1	6	533	538	E	P23327_2	491	127	617	0.385	0.385	EEEEEE	HHHHHH	53.54,59.33,62.58,66.86,70.03,74.91	64.72	HGGQARGHRGHGSEDTEDSAEHRHHLPSHRSHSHQDEDEDEVVSSEHHHHILRHGHRGHDGEDDEGEEEEEEEEEEEEASTEYGHQAHRHRGHGSEEDEDVSDGHHHHGPSHRHQGHEEDDDDDDDDDDDDDDDDVSIEYRHQAHRHQGHGIEEDEDVSDGHHHRDPSHRHRSHEEDDNDDDDVSTEYGHQAHRHQDHRKEEVEAVSGEHHHHVPDHRHQGHRDEEEDEDVSTERWHQGPQHVHHGLVDEEEEEEEITVQFGHYVASHQPRGHKSDEEDFQDEYKTEVPHHHHHRVPREEDEEVSAELGHQAPSHRQSHQDEETGHGQRGSIKEMSHHPPGHTVVKDRSHLRKDDSEEEKEKEEDPGSHEEDDESSEQGEKGTHHGSRDQEDEEDEEEG…	SSHHHHHHHHHHHHHHHHHHHHHHHHHHTT GGGG S HHHH	39.51,38.02,42.49,41.77,38.09,39.31,41.31,43.15,44.9,43.48,44.47,48.97,55.25,51.56,52.27,51.92,52.16,45.4,50.42,47.94,44.0,41.76,41.88,38.05,45.74,42.69,43.32,36.22,37.08,38.46,37.68,43.39,39.68,50.31,49.07,52.44,49.61,54.91,51.84,53.65,43.81,48.95,38.09,44.61,38.82,36.8,38.45,36.61,43.66,45.34,47.94,40.61,46.17,43.79,41.45,44.23,42.9,44.44,51.09,49.16,49.79,51.91,47.27,55.6,46.66,51.24,47.98,49.…	44.53	KEKEEDPGSHEEDDESSEQGEKGTHHGSRDQEDEEDEEEGHGLSLNQEEE	EEEDKEEEEEEEDEERREERAEVGAPLSPDHSEEEEEEEEGLEEDEPRFT	SSHHHH	HHHHHHHHHHHHHHHHHHHHHHTT
P23327	P23327_p_5_1	7	541	547	E	P23327_2	491	127	617	0.385	0.385	EEEEEEE	HHHHHHH	82.39,84.32,85.55,85.66,85.51,86.87,86.51	85.55	HGGQARGHRGHGSEDTEDSAEHRHHLPSHRSHSHQDEDEDEVVSSEHHHHILRHGHRGHDGEDDEGEEEEEEEEEEEEASTEYGHQAHRHRGHGSEEDEDVSDGHHHHGPSHRHQGHEEDDDDDDDDDDDDDDDDVSIEYRHQAHRHQGHGIEEDEDVSDGHHHRDPSHRHRSHEEDDNDDDDVSTEYGHQAHRHQDHRKEEVEAVSGEHHHHVPDHRHQGHRDEEEDEDVSTERWHQGPQHVHHGLVDEEEEEEEITVQFGHYVASHQPRGHKSDEEDFQDEYKTEVPHHHHHRVPREEDEEVSAELGHQAPSHRQSHQDEETGHGQRGSIKEMSHHPPGHTVVKDRSHLRKDDSEEEKEKEEDPGSHEEDDESSEQGEKGTHHGSRDQEDEEDEEEG…	SSHHHHHHHHHHHHHHHHHHHHHHHHHHTT GGGG S HHHH	39.51,38.02,42.49,41.77,38.09,39.31,41.31,43.15,44.9,43.48,44.47,48.97,55.25,51.56,52.27,51.92,52.16,45.4,50.42,47.94,44.0,41.76,41.88,38.05,45.74,42.69,43.32,36.22,37.08,38.46,37.68,43.39,39.68,50.31,49.07,52.44,49.61,54.91,51.84,53.65,43.81,48.95,38.09,44.61,38.82,36.8,38.45,36.61,43.66,45.34,47.94,40.61,46.17,43.79,41.45,44.23,42.9,44.44,51.09,49.16,49.79,51.91,47.27,55.6,46.66,51.24,47.98,49.…	44.53	SHEEDDESSEQGEKGTHHGSRDQEDEEDEEEGHGLSLNQEEEEEEDKEEE	EEEEDEERREERAEVGAPLSPDHSEEEEEEEEGLEEDEPRFTIIPNPLDR	SSHHHHHHHHHHHH	HHHHHHHHHHHHHHTT GGGG
P23327	P23327_p_6_1	8	568	575	E	P23327_2	491	127	617	0.385	0.385	EEEEEEEE		37.4,41.17,39.18,40.15,43.13,43.43,42.63,35.45	40.66	HGGQARGHRGHGSEDTEDSAEHRHHLPSHRSHSHQDEDEDEVVSSEHHHHILRHGHRGHDGEDDEGEEEEEEEEEEEEASTEYGHQAHRHRGHGSEEDEDVSDGHHHHGPSHRHQGHEEDDDDDDDDDDDDDDDDVSIEYRHQAHRHQGHGIEEDEDVSDGHHHRDPSHRHRSHEEDDNDDDDVSTEYGHQAHRHQDHRKEEVEAVSGEHHHHVPDHRHQGHRDEEEDEDVSTERWHQGPQHVHHGLVDEEEEEEEITVQFGHYVASHQPRGHKSDEEDFQDEYKTEVPHHHHHRVPREEDEEVSAELGHQAPSHRQSHQDEETGHGQRGSIKEMSHHPPGHTVVKDRSHLRKDDSEEEKEKEEDPGSHEEDDESSEQGEKGTHHGSRDQEDEEDEEEG…	SSHHHHHHHHHHHHHHHHHHHHHHHHHHTT GGGG S HHHH	39.51,38.02,42.49,41.77,38.09,39.31,41.31,43.15,44.9,43.48,44.47,48.97,55.25,51.56,52.27,51.92,52.16,45.4,50.42,47.94,44.0,41.76,41.88,38.05,45.74,42.69,43.32,36.22,37.08,38.46,37.68,43.39,39.68,50.31,49.07,52.44,49.61,54.91,51.84,53.65,43.81,48.95,38.09,44.61,38.82,36.8,38.45,36.61,43.66,45.34,47.94,40.61,46.17,43.79,41.45,44.23,42.9,44.44,51.09,49.16,49.79,51.91,47.27,55.6,46.66,51.24,47.98,49.…	44.53	EEEGHGLSLNQEEEEEEDKEEEEEEEDEERREERAEVGAPLSPDHSEEEE	EEEEGLEEDEPRFTIIPNPLDRREEAGGASSEEESGEDTGPQDAQEYGNY	SSHHHHHHHHHHHHHHHHHHHHHHHHHHTT	GGGG S HHHHTT
P23443	P23443_p_1_1	6	2	7	R	P23443_1	54	1	54	0.563	0.563	RRRRRR		34.88,34.7,35.81,32.31,34.6,34.93	34.79	MRRRRRRDGFYPAPDFRDREAEDMAGVFDIDLDQPEDAGSEDELEEGGQLNESM	S SS TT S	33.19,34.88,34.7,35.81,32.31,34.6,34.93,29.0,32.71,27.88,31.3,34.13,33.25,32.16,28.69,28.76,27.52,28.21,27.86,27.96,28.08,29.33,28.89,28.25,25.57,27.14,29.79,31.01,27.22,31.53,26.88,34.83,30.94,33.92,33.04,31.24,35.05,28.86,32.76,34.83,30.49,33.09,37.29,36.45,29.22,35.87,32.45,32.98,28.91,34.61,32.4,31.86,33.99,31.29	31.695	||||||||||||||||||||||||||||||||||||||||||||||MRRR	RRRDGFYPAPDFRDREAEDMAGVFDIDLDQPEDAGSEDELEEGGQLNESM	||||||||||||||||||||||||||||||||||||||||||||||	S SS TT S
P23471	P23471_p_1_1	6	1426	1431	D	P23471_5	127	1397	1523	0.556	0.556	DDDDDD		40.79,40.88,40.05,39.1,37.13,37.45	39.575	KATSELSHSAKSDAGLVGGGEDGDTDDDGDDDDDDRGSDGLSIHKCMSCSSYRESQEKVMNDSDTHENSLMDQNNPISYSLSENSEEDNRVTSVSSDSQTGMDRSPGKSPSANGLSQKHNDGKEEND	B	28.05,28.27,29.64,28.75,31.64,29.29,29.84,33.28,28.48,31.95,33.4,29.8,34.22,34.31,34.25,33.42,33.58,33.33,33.56,34.45,38.59,40.28,36.91,41.3,42.42,37.48,41.86,43.35,40.94,40.79,40.88,40.05,39.1,37.13,37.45,35.53,35.1,35.42,32.9,33.79,30.79,31.69,30.74,32.79,33.28,33.78,32.63,29.81,30.09,28.65,27.99,29.28,30.4,29.87,28.89,28.12,27.22,26.96,27.5,29.75,29.64,27.22,28.14,26.04,26.27,31.82,28.95,25.23…	32.41	VSPHRDGSVTSTKLLFPSKATSELSHSAKSDAGLVGGGEDGDTDDDGDDD	DDDRGSDGLSIHKCMSCSSYRESQEKVMNDSDTHENSLMDQNNPISYSLS
P23490	P23490_p_1_1	8	21	28	G	P23490_1	27	1	27	0.659	0.659	GGGGGGGG		62.37,62.46,55.64,57.7,47.01,47.5,52.5,47.95	54.07	MSYQKKQPTPQPPVDCVKTSGGGGGGG		71.44,79.36,72.8,74.05,77.82,76.24,74.47,74.25,79.31,75.72,80.2,75.12,74.44,74.35,64.66,60.94,60.73,50.38,62.93,64.81,62.37,62.46,55.64,57.7,47.01,47.5,52.5	71.44	||||||||||||||||||||||||||MSYQKKQPTPQPPVDCVKTSGGGG	GGGGSGGGGCGFFGGGGSGGGSSGSGCGYSGGGGYSGGGCGGGSSGGGGG	||||||||||||||||||||||||||
P23490	P23490_p_3_1	6	278	283	G	P23490_2	37	276	312	0.707	0.707	GGGGGG		38.64,38.49,40.36,39.77,42.19,41.95	40.065	SSGGGGGGSSVGGSGSGKGVPICHQTQQKQAPTWPSK		47.08,46.09,38.64,38.49,40.36,39.77,42.19,41.95,47.32,51.46,48.53,45.54,42.28,48.08,47.7,49.56,54.33,51.17,58.79,67.3,59.65,72.47,67.39,71.2,72.94,74.73,73.61,75.54,76.08,74.67,78.27,76.05,80.64,77.62,76.19,73.66,66.08	58.79	GGGGSGGSGCFSSGGGGGSSGCGGGSSGIGSGCIISGGGSVCGGGSSGGG	GGGSSVGGSGSGKGVPICHQTQQKQAPTWPSK||||||||||||||||||		||||||||||||||||||
P23610	P23610_p_1_1	6	223	228	P	P23610_1	38	213	250	0.774	0.774	PPPPPP		34.7,40.18,40.56,41.53,42.66,42.42	41.045	EHGSHPVQSLPPPPPPAPQPGPGATPALPAALLPPNSG	HHHH	86.24,79.7,72.4,61.71,46.12,38.7,31.39,29.4,30.4,29.54,34.7,40.18,40.56,41.53,42.66,42.42,40.51,43.54,32.81,36.93,31.25,35.58,29.99,31.17,25.55,45.11,26.07,27.02,43.66,35.57,29.42,26.4,31.0,35.83,37.26,32.58,37.81,33.53	35.705	LPLAALQALGEAASCQLLARDYTGALAVFTRMQRLAREHGSHPVQSLPPP	PPPAPQPGPGATPALPAALLPPNSGSAAPSPAALGAFSDVLVRCEVSRVL	HHHHHHHHHHHHHHHHHTT HHHHHHHHHHHHHHHHHHHH	GGGGHHHHHHHHHHHHHHHH
P24385	P24385_p_1_1	9	272	280	E	P24385_1	34	262	295	0.611	0.611	EEEEEEEEE	HHHTTT TT	47.0,48.31,48.66,44.58,43.88,44.48,41.34,39.55,42.52	44.48	AQQNMDPKAAEEEEEEEEEVDLACTPTDVRDVDI	HHHTT TTTHHHHTTT TTT SSTTGGGT	84.23,84.6,82.42,74.9,69.5,59.11,56.45,53.92,49.27,49.31,47.0,48.31,48.66,44.58,43.88,44.48,41.34,39.55,42.52,47.05,55.23,59.76,68.72,77.81,80.3,79.86,83.65,80.57,77.51,79.54,74.17,63.57,57.85,51.57	58.48	YYRLTRFLSRVIKCDPDCLRACQEQIEALLESSLRQAQQNMDPKAAEEEE	EEEEEVDLACTPTDVRDVDI||||||||||||||||||||||||||||||	HHHHHHHHHHHHT HHHHHHHHHHHHHHHHHHHHHHHHTT TTTHHHHT	TT TTT SSTTGGGT ||||||||||||||||||||||||||||||
P25440	P25440_p_1_1	6	492	497	E	P25440_3	192	456	647	0.527	0.527	EEEEEE		38.7,41.17,42.87,41.79,38.37,41.44	41.305	EPLEPGPLPVSTAMPPGLAKSSSESSSEESSSESSSEEEEEEDEEDEEEEESESSDSEEERAHRLAELQEQLRAVHEQLAALSQGPISKPKRKREKKEKKKKRKAEKHRGRAGADEDDKGPRAPRPPQPKKSKKASGSGGGSAALGPSGFGPSGGSGTKLPKKATKTAPPALPTGYDSEEEEESRPMSYDEK	HHHHHHHHHHHHHHHHHHHHHHHHHHS S S SS SHHHHHH HHHH	62.76,56.84,51.85,48.81,44.83,43.5,47.22,40.92,46.67,47.46,43.39,46.33,40.69,42.65,52.89,43.64,38.83,42.26,46.15,46.67,45.13,48.09,45.59,42.92,38.1,40.04,36.52,37.42,37.32,40.55,37.3,37.56,39.14,38.46,43.92,35.97,38.7,41.17,42.87,41.79,38.37,41.44,38.07,42.81,39.38,35.4,42.51,35.67,38.91,38.89,41.52,33.04,35.45,38.38,40.93,55.16,64.94,72.87,72.51,75.05,77.26,82.36,87.16,88.79,85.23,89.27,90.27,91…	41.765	VFEFRYAKMPDEPLEPGPLPVSTAMPPGLAKSSSESSSEESSSESSSEEE	EEEDEEDEEEEESESSDSEEERAHRLAELQEQLRAVHEQLAALSQGPISK	HHHHHHTTS	HHHHHHHHHHHHHHHHHHHHHHHHHHS
P25440	P25440_p_2_1	11	783	793	S	P25440_4	65	737	801	0.609	0.609	SSSSSSSSSSS		44.51,39.51,40.23,40.66,38.75,41.9,43.21,42.81,46.79,46.96,53.94	42.81	EKRLQDVSGQLNSTKKPPKKANEKTESSSAQQVAVSRLSASSSSSDSSSSSSSSSSSDTSDSDSG	HHHHHHHHHHHS	80.56,83.46,77.53,73.86,72.78,68.35,61.81,53.72,53.19,51.24,43.89,42.98,36.87,37.9,43.16,37.1,38.34,39.77,35.77,40.14,38.49,41.92,42.44,40.66,37.6,38.03,39.01,40.19,38.75,38.49,38.85,37.53,37.29,39.9,38.08,41.53,39.45,41.74,43.44,46.16,42.76,43.58,43.68,41.87,45.1,38.44,44.51,39.51,40.23,40.66,38.75,41.9,43.21,42.81,46.79,46.96,53.94,55.7,53.35,65.12,61.05,66.12,64.02,53.01,56.92	42.76	KRLQDVSGQLNSTKKPPKKANEKTESSSAQQVAVSRLSASSSSSDSSSSS	SSSSSSDTSDSDSG||||||||||||||||||||||||||||||||||||	HHHHHHHHHHS	||||||||||||||||||||||||||||||||||||
P25490	P25490_p_1_1	11	70	80	H	P25490_1	49	33	81	0.484	0.484	HHHHHHHHHHH		37.08,33.72,36.75,32.46,34.42,31.82,33.16,32.55,29.49,30.55,27.28	32.55	VETIETTVVGEEEEEDDDDEDGGGGDHGGGGGHGHAGHHHHHHHHHHHP		31.3,34.54,27.22,29.1,29.38,27.66,25.87,25.35,26.79,26.82,26.45,31.58,31.14,36.17,35.9,41.63,46.86,45.2,49.64,50.14,44.68,42.37,41.31,42.2,39.17,44.97,46.63,41.89,35.67,39.05,33.96,35.15,36.12,32.03,37.14,39.96,31.25,37.08,33.72,36.75,32.46,34.42,31.82,33.16,32.55,29.49,30.55,27.28,27.58	34.42	EIEVETIPVETIETTVVGEEEEEDDDDEDGGGGDHGGGGGHGHAGHHHHH	HHHHHHPPMIALQPLVTDDPTQVHHHQEVILVQTREEVVGGDDSDGLRAE
P26583	P26583_p_1_1	8	190	197	E	P26583_2	48	162	209	0.239	0.239	EEEEEEEE		33.86,34.09,30.26,29.38,31.02,31.24,32.79,32.32	31.78	YRAKGKSEAGKKGPGRPTGSKKKNEPEDEEEEEEEEDEDEEEEDEDEE	HHHHHHHHHTTS	87.76,87.21,87.91,83.27,70.39,62.88,54.09,45.33,45.56,39.08,36.5,30.12,29.49,38.1,32.9,30.67,40.91,28.31,28.57,31.67,31.16,32.01,31.15,30.78,34.78,39.37,36.22,30.86,33.86,34.09,30.26,29.38,31.02,31.24,32.79,32.32,34.33,36.41,29.58,42.42,37.62,43.68,40.72,45.65,39.51,47.89,41.42,51.33	36.315	YEQKAAKLKEKYEKDIAAYRAKGKSEAGKKGPGRPTGSKKKNEPEDEEEE	EEEEDEDEEEEDEDEE||||||||||||||||||||||||||||||||||	HHHHHHHHHHHHHHHHHHHHHHHHHHHTTS	||||||||||||||||||||||||||||||||||
P28356	P28356_p_1_1	10	131	140	G	P28356_1	83	126	208	0.718	0.718	GGGGGGGGGG		41.81,43.09,43.65,45.08,45.29,46.53,47.15,47.41,48.06,51.26	45.91	FPGGAGGGGGGGGGGPGRGPSPGPSGPANGRHYGIKPETRAAPAPATAASTTSSSSTSLSSSSKRTECSVARESQGSSGPEFS		43.77,49.35,47.86,42.15,43.12,41.81,43.09,43.65,45.08,45.29,46.53,47.15,47.41,48.06,51.26,54.82,52.56,54.72,52.61,59.88,60.35,59.59,59.0,64.15,53.02,48.09,54.19,50.88,51.85,46.73,56.3,57.37,39.13,46.51,52.48,50.1,54.97,51.64,53.43,49.38,48.94,47.13,58.86,53.84,53.28,47.56,45.59,44.73,44.99,47.68,48.15,49.53,49.73,51.04,52.1,48.55,51.17,45.99,51.0,45.91,52.84,48.34,48.67,50.68,37.87,49.19,45.18,32…	48.15	PPAAAAMSGLYHPYVPPPPLAASASEPGRYVRSWMEPLPGFPGGAGGGGG	GGGGGPGRGPSPGPSGPANGRHYGIKPETRAAPAPATAASTTSSSSTSLS	S S SS
P28702	P28702_p_1_1	7	46	52	A	P28702_2	146	36	181	0.734	0.734	AAAAAAA	HHHHHHH	41.74,45.68,42.98,44.01,46.01,48.92,44.52	44.52	WRRRRPWLDPAAAAAAAVAGGEQQTPEPEPGEAGRDGMGDSGRDSRSPDSSSPNPLPQGVPPPSPPGPPLPPSTAPSLGGSGAPPPPPMPPPPLGSPFPVISSSMGSPGLPPPAPPGFSGPVSSPQINSTVSLPGGGSGPPEDVKP	SS TT HHHHHHHHHHTS S	32.05,30.72,35.14,32.34,32.32,30.4,33.22,40.52,43.89,45.19,41.74,45.68,42.98,44.01,46.01,48.92,44.52,49.84,52.04,45.13,42.52,43.01,39.35,36.23,34.32,38.31,36.38,46.22,37.25,45.9,46.86,38.44,38.86,43.41,39.01,40.52,41.34,44.46,43.85,45.64,48.31,42.04,46.43,45.99,45.08,42.35,41.94,51.38,41.44,43.47,43.52,47.92,54.6,47.94,51.05,43.17,51.45,45.99,48.57,54.79,62.13,71.5,57.91,62.34,63.58,67.53,62.16,6…	43.95	||MSWAARPPFLPQRHAAGQCGPVGVRKEMHCGVASRWRRRRPWLDPAAA	AAAAVAGGEQQTPEPEPGEAGRDGMGDSGRDSRSPDSSSPNPLPQGVPPP	|| SSS SS TT HHHH	HHHHHHTS
P29084	P29084_p_1_1	6	31	36	S	P29084_1	63	1	63	0.593	0.593	SSSSSS		41.24,40.71,40.65,42.32,41.73,51.71	41.485	MDPSLLRERELFKKRALSTPVVEKRSASSESSSSSSKKKKTKVEHGGSSGSKQNSDHSNGSFN	HHHHHHHHHHHHHHHT S	54.76,71.43,81.58,80.21,78.07,78.22,78.99,81.91,85.36,84.34,84.39,81.34,86.73,81.21,78.19,76.64,74.37,71.76,68.31,53.75,50.78,47.34,55.08,43.95,41.38,44.06,38.25,39.12,41.09,40.1,41.24,40.71,40.65,42.32,41.73,51.71,42.91,54.57,45.36,48.3,45.77,39.66,44.84,39.69,42.7,37.51,35.2,39.58,41.7,38.16,43.56,36.31,44.11,34.37,37.15,38.29,38.25,44.49,46.72,41.76,45.58,57.78,51.69	45.36	|||||||||||||||||MDPSLLRERELFKKRALSTPVVEKRSASSESSS	SSSKKKKTKVEHGGSSGSKQNSDHSNGSFNLKALSGSSGYKFGVLAKIVN	||||||||||||||||| HHHHHHHHHHHHHHHT	S GGG SHHHHHHHHHHHHHH
P29536	P29536_p_1_1	7	534	540	P	P29536_3	102	472	573	0.591	0.591	PPPPPPP		73.03,77.66,80.78,80.3,78.6,77.05,72.16	77.66	DKQRQKRLQEQRQAQEAKGEKKDLLEVPKAGAVAKGSPKPSPQPSPKPSPKNSPKKGGAPAAPPPPPPPLAPPLIMENLKNSLSPATQRKMGDKVLPAQEKN	HHHHHHHHHHHHHHHHHHHHHHHT S TT SS GGG TTTTH	96.56,94.77,91.9,95.11,95.23,93.84,93.59,94.12,94.9,94.08,92.64,93.28,90.35,89.8,86.03,85.05,82.69,76.93,64.42,58.56,57.63,52.91,51.91,50.22,48.87,43.38,42.17,48.55,42.54,40.01,40.47,44.59,42.56,47.37,40.99,44.95,47.63,55.77,51.99,48.33,48.75,56.57,54.7,50.21,50.19,61.69,59.97,46.55,54.25,48.44,38.71,44.21,49.97,43.7,44.36,43.7,34.0,43.92,51.05,54.81,57.57,65.26,73.03,77.66,80.78,80.3,78.6,77.05,…	54.56	EAKGEKKDLLEVPKAGAVAKGSPKPSPQPSPKPSPKNSPKKGGAPAAPPP	PPPPLAPPLIMENLKNSLSPATQRKMGDKVLPAQEKNSRDQLLAAIRSSN	HHHHHHHHT S	TT SS GGG TTTTHHHHHHHHHHHH
P29966	P29966_p_1_1	6	200	205	A	P29966_1	332	1	332	0.723	0.723	AAAAAA		41.16,38.0,40.6,38.85,40.87,41.23	40.735	MGAQFSKTAAKGEAAAERPGEAAVASSPSKANGQENGHVKVNGDASPAAAESGAKEELQANGSAPAADKEEPAAAGSGAASPSAAEKGEPAAAAAPEAGASPVEKEAPAEGEAAEPGSPTAAEGEAASAASSTSSPKAEDGATPSPSNETPKKKKKRFSFKKSFKLSGFSFKKNKKEAGEGGEAEAPAAEGGKDEAAGGAAAAAAEAGAASGEQAAAPGEEAAAGEEGAAGGDPQEAKPQEAAVAPEKPPASDETKAAEEPSKVEEKKAEEAGASAAACEAPSAAGPGAPPEQEAAPAEEPAAAAASSACAAPSQEAQPECSPEAPPAEAAE	S S SS S S TT TTS	55.34,64.52,43.57,68.99,54.14,69.79,63.63,47.26,54.94,51.85,58.8,52.6,49.87,45.48,48.53,53.04,55.13,54.6,50.91,51.54,45.55,48.07,49.95,50.46,55.89,53.24,48.91,62.63,56.01,59.08,58.51,57.53,55.97,61.83,65.57,62.54,60.8,60.73,60.32,65.56,67.83,60.17,54.63,55.28,55.37,52.46,53.91,48.01,48.98,45.92,48.39,47.22,48.1,42.29,53.7,46.26,48.65,52.48,46.71,52.87,55.87,52.23,46.59,46.92,53.56,46.37,51.51,50.…	47.24	KKKKRFSFKKSFKLSGFSFKKNKKEAGEGGEAEAPAAEGGKDEAAGGAAA	AAAEAGAASGEQAAAPGEEAAAGEEGAAGGDPQEAKPQEAAVAPEKPPAS	S S TT TTS
P30291	P30291_p_1_1	10	34	43	E	P30291_1	181	1	181	0.644	0.644	EEEEEEEEEE		32.92,37.95,37.83,32.58,39.77,33.54,39.7,36.35,39.5,37.4	37.615	MSFLSRQQPPPPRRAGAACTLRQKLIFSPCSDCEEEEEEEEEEGSGHSTGEDSAFQEPDSPLPPARSPTEPGPERRRSPGPAPGSPGELEEDLLLPGACPGADEAGGGAEGDSWEEEGFGSSSPVKSPAAPYFLGSSFSPVRCGGPGDASPRGCGARRAGEGRRSPRPDHPGTPPHKTFRK	S TTS HHHHT	37.26,37.22,35.72,39.5,40.0,36.25,39.29,34.14,36.65,38.2,36.2,38.55,41.56,35.77,35.44,34.9,30.68,34.9,29.28,34.05,33.31,35.82,36.61,31.79,35.81,29.67,33.06,32.59,37.86,32.96,36.11,32.71,34.97,32.92,37.95,37.83,32.58,39.77,33.54,39.7,36.35,39.5,37.4,40.96,42.55,41.24,42.82,44.92,42.79,38.0,45.1,41.4,46.11,42.04,44.4,44.7,39.53,52.26,39.59,49.26,48.36,51.5,46.83,46.7,47.05,43.48,40.38,50.08,43.17,4…	40.06	||||||||||||MSFLSRQQPPPPRRAGAACTLRQKLIFSPCSDCEEEEE	EEEEEGSGHSTGEDSAFQEPDSPLPPARSPTEPGPERRRSPGPAPGSPGE	||||||||||||
P30414	P30414_p_1_1	6	1024	1029	E	P30414_3	415	658	1072	0.444	0.444	EEEEEE		37.53,39.78,38.68,39.01,39.34,40.58	39.175	TGSSSSYHKREKNSESDQSTYSKYSDRSSESSPRSRSRSSRSRSYSRSYTRSRSLASSHSRSRSPSSRSHSRNKYSDHSQCSRSSSYTSISSDDGRRAKRRLRSSGKKNSVSHKKHSSSSEKTLHSKYVKGRDRSSCVRKYSESRSSLDYSSDSEQSSVQATQSAQEKEKQGQMERTHNKQEKNRGEEKSKSERECPHSKKRTLKENLSDHLRNGSKPKRKNYAGSKWDSESNSERDVTKNSKNDSHPSSDKEEGEATSDSESEVSEIHIKVKPTTKSSTNTSLPDDNGAWKSSKQRTSTSDSEGSCSNSENNRGKPQKHKHGSKENLKREHTKKVKEKLKGKKDKKHKAPKRKQAFHWQPPLEFGEEEEEEIDDKQVTQESKEKKVSENNETIKDNIL…	EE S S	28.56,33.39,31.29,32.08,32.92,33.13,30.67,31.19,32.0,31.91,33.39,33.25,33.67,30.95,37.46,33.06,36.73,32.24,29.63,30.12,29.76,30.91,31.54,40.28,31.89,32.91,35.96,36.08,35.81,39.89,40.41,39.1,42.12,39.55,35.8,39.15,35.48,38.25,32.46,33.14,35.6,33.98,40.1,33.45,42.28,34.3,36.34,30.5,37.49,32.57,31.6,29.59,32.53,31.25,32.27,31.43,32.65,31.47,31.17,29.73,31.04,30.1,32.33,37.71,42.47,35.25,40.87,34.98,…	33.38	HKHGSKENLKREHTKKVKEKLKGKKDKKHKAPKRKQAFHWQPPLEFGEEE	EEEIDDKQVTQESKEKKVSENNETIKDNILKTEKSSEEDLSGKHDTVTVS
P30419	P30419_p_1_1	6	55	60	K	P30419_1	82	1	82	0.497	0.497	KKKKKK		39.61,42.78,39.94,40.82,38.95,40.59	40.265	MADESETAVKPPAPPLPQMMEGNGNGHEHCSDCENEEDNSYNRGGLSPANDTGAKKKKKKQKKKKEKGSETDSAQDQPVKMN		39.86,38.51,40.56,39.17,41.73,36.43,40.17,38.05,35.8,40.03,48.39,38.89,46.98,51.8,37.64,43.17,38.24,32.86,34.73,33.82,37.53,32.82,30.64,32.81,30.49,31.93,31.8,32.93,31.99,29.68,26.91,29.95,33.15,30.1,34.45,35.24,32.56,34.89,33.04,32.9,36.55,32.72,38.81,31.94,39.06,38.52,39.17,44.21,38.14,41.62,40.65,41.54,39.96,41.6,39.61,42.78,39.94,40.82,38.95,40.59,40.55,37.24,39.75,39.01,36.24,39.85,35.01,36.…	37.36	AVKPPAPPLPQMMEGNGNGHEHCSDCENEEDNSYNRGGLSPANDTGAKKK	KKKQKKKKEKGSETDSAQDQPVKMNSLPAERIQEIQKAIELFSVGQGPAK		HHHHHHHHHHHHHHHTTS
P31249	P31249_p_1_1	6	119	124	P	P31249_2	130	68	197	0.652	0.652	PPPPPP		75.56,77.42,75.53,77.41,75.99,67.95	75.775	CSIQSSAPLRAPAHKGAELNGSCMRPGTGNSQGGGGGSQPPGLNSEQQPPQPPPPPPTLPPSSPTNPGGGVPAKKPKGGPNASSSSATISKQIFPWMKESRQNSKQKNSCATAGESCEDKSPPGPASKRV	HHHHHHHHHHHGGGSS S	42.84,41.49,49.16,42.59,46.11,46.77,46.24,49.04,48.7,43.62,40.0,47.88,43.01,50.35,45.27,42.02,45.89,46.36,50.03,44.76,44.44,45.12,39.67,53.24,46.3,48.31,41.77,44.48,43.76,42.22,44.14,46.7,43.58,42.13,43.18,44.41,45.72,50.95,46.17,57.46,50.56,47.58,50.27,45.94,47.3,42.09,46.14,52.13,65.87,65.76,65.48,75.56,77.42,75.53,77.41,75.99,67.95,64.49,66.15,72.65,67.56,53.59,59.24,64.24,45.33,55.46,47.19,45…	49.755	SSAPLRAPAHKGAELNGSCMRPGTGNSQGGGGGSQPPGLNSEQQPPQPPP	PPPTLPPSSPTNPGGGVPAKKPKGGPNASSSSATISKQIFPWMKESRQNS		HHHHHHHHHH
P31260	P31260_p_3_1	6	97	102	G	P31260_1	70	89	158	0.665	0.665	GGGGGG		44.65,44.22,44.51,45.2,44.3,42.11	44.405	NEAASPGSGGGGGGLGPGAHGYGPSPIDLWLDAPRSCRMEPPDGPPPPPQQQPPPPPQPPQPAPQATSCS		53.42,45.01,47.76,48.86,53.54,50.44,46.79,51.02,44.65,44.22,44.51,45.2,44.3,42.11,53.72,43.54,45.32,44.61,45.99,48.27,43.18,47.16,48.47,56.6,48.97,55.9,62.66,47.93,52.54,49.88,47.53,42.31,50.12,45.96,48.77,40.94,41.19,57.87,61.24,64.07,71.59,62.16,57.42,77.41,77.51,75.97,76.83,77.5,74.06,71.12,68.83,72.27,78.56,80.63,80.82,82.48,81.03,78.48,79.94,78.89,72.68,70.8,61.33,63.5,50.69,50.87,48.3,48.09…	50.945	GGGGGGGYYAHGGVYLPPAADLPYGLQSCGLFPTLGGKRNEAASPGSGGG	GGGLGPGAHGYGPSPIDLWLDAPRSCRMEPPDGPPPPPQQQPPPPPQPPQ
P31270	P31270_p_1_1	7	177	183	A	P31270_1	93	154	246	0.637	0.637	AAAAAAA		40.36,37.54,39.88,40.57,42.06,40.97,44.76	40.57	LASSDYPGDKSAEKGPPAATATSAAAAAAATGAPATSSSDSGGGGGCRETAAAAEEKERRRRPESSSSPESSSGHTEDKAGGSSGQRTRKKRC		44.72,41.81,41.27,46.01,44.49,38.3,46.9,44.28,44.97,49.62,42.24,48.25,50.02,44.48,42.15,49.09,53.53,43.53,41.14,41.34,40.05,44.42,42.15,40.36,37.54,39.88,40.57,42.06,40.97,44.76,47.18,42.14,43.6,50.6,40.26,47.41,46.23,45.79,48.47,45.02,49.72,42.64,37.18,39.22,38.69,33.78,45.67,36.0,37.07,39.34,39.9,41.45,44.18,47.16,50.73,50.15,52.86,55.28,52.84,51.64,53.18,46.45,44.94,44.61,47.66,44.6,45.46,48.9…	45.84	VGRNGVLPQAFDQFFETAYGTPENLASSDYPGDKSAEKGPPAATATSAAA	AAAATGAPATSSSDSGGGGGCRETAAAAEEKERRRRPESSSSPESSSGHT	TTTSSSS GGGHHHHHHHH
P31276	P31276_p_1_1	10	29	38	G	P31276_1	21	30	50	0.87	0.87	GGGGGGGGGG		46.47,45.25,44.6,45.36,46.12,47.49,45.39,46.87,45.43,45.84	45.635	GGGGGGGGGTGGAGGGCSGAS		45.25,44.6,45.36,46.12,47.49,45.39,46.87,45.43,45.84,52.8,46.32,47.82,55.04,49.46,47.01,48.92,54.69,53.66,41.56,50.46,53.16	47.01	|||||||||||||||||MTTSLLLHPRWPESLMYVYEDSAAESGIGGGGG	GGGGGTGGAGGGCSGASPGKAPSMDGLGSSCPASHCRDLLPHPVLGRPPA	||||||||||||||||| S
P31948	P31948_p_1_1	7	199	205	P	P31948_1	42	192	233	0.457	0.457	PPPPPPP		39.08,36.44,37.57,38.5,41.22,40.81,38.74	38.74	EEEEIATPPPPPPPKKETKPEPMEEDLPENKKQALKEKELGN	S GGGS HHHHHHHHHHHHHH	31.92,28.22,30.43,31.56,35.9,33.21,36.88,39.08,36.44,37.57,38.5,41.22,40.81,38.74,35.01,37.45,30.46,32.78,31.91,33.54,38.67,37.18,42.75,51.51,51.11,66.52,76.76,87.5,90.88,91.19,92.28,92.21,95.11,96.05,94.55,95.99,98.0,97.09,97.11,97.79,97.89,97.44	41.015	YRELIEQLRNKPSDLGTKLQDPRIMTTLSVLLGVDLGSMDEEEEIATPPP	PPPPKKETKPEPMEEDLPENKKQALKEKELGNDAYKKKDFDTALKHYDKA	HHHHHHHHHH GGGHHHHTTSHHHHHHHHHHHTS GGGTTS	GGGS HHHHHHHHHHHHHHHHHHTT HHHHHHHHHHH
P32242	P32242_p_2_1	10	292	301	H	P32242_2	49	257	305	0.498	0.498	HHHHHHHHHH		49.0,53.04,48.15,50.9,48.73,53.81,47.86,46.06,50.45,48.39	48.865	SHHHPHQLSPMAPSSMAGHHHHHPHAHHPLSQSSGHHHHHHHHHHQGYG		43.82,49.95,48.35,55.81,48.24,50.34,46.17,50.63,53.43,58.73,53.75,52.62,59.81,51.63,50.97,54.85,50.39,47.02,54.84,51.68,49.9,49.75,49.18,57.86,50.6,47.83,56.8,51.96,58.44,48.92,47.81,48.53,48.03,51.15,45.58,49.0,53.04,48.15,50.9,48.73,53.81,47.86,46.06,50.45,48.39,46.84,40.32,45.22,43.15	49.95	DCSSYLAPMHSHHHPHQLSPMAPSSMAGHHHHHPHAHHPLSQSSGHHHHH	HHHHHQGYGGSGLAFNSADCLDYKEPGAAAASSAWKLNFNSPDCLDYKDQ
P32243	P32243_p_1_1	7	95	101	Q	P32243_1	51	93	143	0.581	0.581	QQQQQQQ	HHHHHHH	93.92,92.39,90.62,90.09,88.19,85.76,80.28	90.09	CRQQQQQQQNGGQNKVRPAKKKTSPAREVSSESGTSGQFTPPSSTSVPTIA	HHHHHHHHHGGGS	95.09,96.1,93.92,92.39,90.62,90.09,88.19,85.76,80.28,70.68,61.76,57.41,57.9,44.46,51.6,55.74,57.94,51.5,57.69,50.84,56.33,53.7,54.28,52.63,47.41,52.36,53.34,43.4,55.57,46.24,45.14,53.19,47.55,47.96,49.06,46.9,48.24,46.74,45.79,50.62,55.97,56.28,43.63,53.5,48.58,48.16,51.32,47.51,45.15,41.39,47.18	52.63	AQLDVLEALFAKTRYPDIFMREEVALKINLPESRVQVWFKNRRAKCRQQQ	QQQQNGGQNKVRPAKKKTSPAREVSSESGTSGQFTPPSSTSVPTIASSSA	HHHHHHHHHHHH SS HHHHHHHHHHTT HHHHHHHHHHHHHHHHHHH	HHHHGGGS
P33402	P33402_p_1_1	8	51	58	A	P33402_1	58	1	58	0.766	0.766	AAAAAAAA		19.96,25.28,21.22,20.72,20.87,20.1,21.8,18.29	20.795	MSRRKISSESFSSLGSDYLETSPEEEGECPLSRLCWNGSRSPPGPLEPSPAAAAAAAA	TTSSSS	34.29,34.99,34.31,33.75,34.47,31.02,31.5,32.35,28.82,32.55,29.15,29.01,30.88,29.3,25.39,26.84,25.4,24.29,23.72,26.49,24.66,23.11,28.03,27.7,26.75,27.12,28.11,25.34,27.17,36.34,27.42,28.17,27.69,28.02,25.57,24.89,26.13,23.21,24.9,23.65,25.48,25.01,25.54,23.09,21.86,20.87,21.91,26.24,24.04,27.26,19.96,25.28,21.22,20.72,20.87,20.1,21.8,18.29	26.185	KISSESFSSLGSDYLETSPEEEGECPLSRLCWNGSRSPPGPLEPSPAAAA	AAAAPAPTPAASAAAAAATAGARRVQRRRRVNLDSLGESISRLTAPSPQT	TTSSSS	TTSSS HHHHHHHHHHHHS HHH
P35219	P35219_p_1_1	6	20	25	E	P35219_1	26	1	26	0.623	0.623	EEEEEE		32.5,30.19,27.71,31.66,33.81,44.95	32.08	MADLSFIEDTVAFPEKEEDEEEEEEG		40.76,36.05,38.65,41.48,37.38,44.53,36.09,43.35,34.59,39.09,35.67,36.67,37.39,35.45,37.84,36.69,35.02,36.18,33.13,32.5,30.19,27.71,31.66,33.81,44.95,62.27	36.425	||||||||||||||||||||||||||||MADLSFIEDTVAFPEKEEDEEE	EEEGVEWGYEEGVEWGLVFPDANGEYQSPINLNSREARYDPSLLDVRLSP	||||||||||||||||||||||||||||	TT GGGT GGGG TT S BEE TTT EE GGGGTS EE
P35241	P35241_p_1_1	8	470	477	P	P35241_3	65	462	526	0.546	0.546	PPPPPPPP		46.74,47.13,47.95,47.74,47.25,48.65,49.58,47.64	47.69	ELKTVMSAPPPPPPPPVIPPTENEHDEHDENNAEASAELSNEGVMNHRSEEERVTETQKNERVKK	SSEE TT GGGT HHHH HHHHH	40.28,39.74,37.48,37.99,38.5,38.97,38.18,43.77,46.74,47.13,47.95,47.74,47.25,48.65,49.58,47.64,52.9,67.11,62.33,49.4,50.38,48.83,50.18,47.83,51.13,52.46,53.3,51.39,49.73,43.98,33.33,35.74,28.98,51.34,56.02,81.68,81.32,85.69,83.04,75.47,73.29,69.81,65.63,66.37,60.07,61.07,64.11,77.94,78.72,80.51,83.92,86.9,89.88,92.45,93.09,91.19,87.82,89.05,89.94,91.57,91.28,92.64,92.94,93.57,94.93	56.02	FTAKIALLEEAKKKKEEEATEWQHKAFAAQEDLEKTKEELKTVMSAPPPP	PPPPVIPPTENEHDEHDENNAEASAELSNEGVMNHRSEEERVTETQKNER	HHHHHHHHHHHHHHHHHHTTT	SSEE TT GGGT HHHH HH
P35269	P35269_p_1_1	6	246	251	K	P35269_1	289	178	466	0.488	0.488	KKKKKK		44.97,45.75,49.36,42.1,52.14,43.17	45.36	QQRRLKDQDQDEDEEEKEKRGRRKASELRIHDLEDDLEMSSDASDASGEEGGRVPKAKKKAPLAKGGRKKKKKKGSDDEAFEDSDDGDFEGQEVDYMSDGSSSSQEEPESKAKAPQQEEGPKGVDEQSDSSEESEEEKPPEEDKEEEEEKKAPTPQEKKRRKDSSEESDSSEESDIDSEASSALFMAKKKTPPKRERKPSGGSSRGNSRPGTPSAEGGSTSSTLRAAASKLEQGKRVSEMPAAKRLRLDTGPQSLSGKSTPQPPSGKTTPNSGDVQVTEDAVRRYLTRK	HHHHHHHHHTSSS SS TTSS B S SHHHHHHTTTSS B S S HHHHHHHHTTS	76.28,77.37,75.5,79.17,72.68,73.57,65.96,60.3,55.85,53.29,50.79,49.0,48.45,44.09,41.84,42.07,43.64,42.0,44.16,45.0,43.78,43.12,49.37,43.9,44.24,51.48,40.99,60.09,53.65,63.08,50.06,50.76,54.83,56.94,52.68,54.19,48.99,54.04,48.12,43.28,43.36,46.14,48.29,46.43,46.35,45.83,45.16,50.02,45.82,42.92,43.75,38.58,46.72,48.58,50.72,45.34,47.92,50.5,48.63,45.51,45.45,52.2,48.24,45.05,46.88,42.97,42.88,45.59…	45.23	RRKASELRIHDLEDDLEMSSDASDASGEEGGRVPKAKKKAPLAKGGRKKK	KKKGSDDEAFEDSDDGDFEGQEVDYMSDGSSSSQEEPESKAKAPQQEEGP	TTSS	B
P35453	P35453_p_1_1	6	25	30	S	P35453_1	28	1	28	0.783	0.783	SSSSSS		49.02,48.55,48.76,47.48,39.02,45.84	48.015	MSRAGSWDMDGLRADGGGAGGAPASSSS		41.14,43.79,45.37,43.72,45.01,45.39,46.06,51.19,50.3,44.87,43.64,42.03,45.73,50.15,47.92,45.06,43.45,42.36,53.5,46.94,45.57,49.85,57.5,47.01,49.02,48.55,48.76,47.48	45.895	|||||||||||||||||||||||MSRAGSWDMDGLRADGGGAGGAPASSS	SSSVAAAAASGQCRGFLSAPVFAGTHSGRAAAAAAAAAAAAAAASGFAYP	|||||||||||||||||||||||
P35453	P35453_p_3_1	8	85	92	S	P35453_2	38	78	115	0.793	0.793	SSSSSSSS		44.78,43.48,47.5,47.11,49.95,49.13,49.88,47.95	47.725	GTSERTGSSSSSSSSAVVAARPEAPPAKECPAPTPAAA		37.79,44.51,42.4,41.61,43.17,44.64,41.97,44.78,43.48,47.5,47.11,49.95,49.13,49.88,47.95,41.27,49.02,48.82,44.75,42.92,51.16,50.79,51.29,49.6,62.46,56.67,51.76,52.04,49.8,35.53,59.41,40.95,62.53,49.2,61.51,42.0,44.24,45.46	47.725	QCRGFLSAPVFAGTHSGRAAAAAAAAAAAAAAASGFAYPGTSERTGSSSS	SSSSAVVAARPEAPPAKECPAPTPAAAAAAPPSAPALGYGYHFGNGYYSC
P35527	P35527_p_1_1	7	15	21	G	P35527_1	25	1	25	0.816	0.816	GGGGGGG		34.62,30.88,28.96,29.71,32.96,29.93,32.88	30.88	MSCRQFSSSYLSRSGGGGGGGLGSG		43.63,39.87,37.22,41.37,39.89,35.63,38.27,35.13,36.68,35.6,32.42,33.36,31.68,33.28,34.62,30.88,28.96,29.71,32.96,29.93,32.88,32.12,27.17,33.47,27.44	33.36	|||||||||||||||||||||||||||||||||MSCRQFSSSYLSRSGGG	GGGGLGSGGSIRSSYSRFSSSGGGGGGGRFSSSSGYGGGSSRVCGRGGGG	|||||||||||||||||||||||||||||||||
P35527	P35527_p_2_1	7	39	45	G	P35527_2	20	35	54	0.782	0.782	GGGGGGG		27.88,31.1,29.25,28.7,30.6,31.27,31.83	30.6	FSSSGGGGGGGRFSSSSGYG		25.64,27.0,25.07,32.22,27.88,31.1,29.25,28.7,30.6,31.27,31.83,31.63,28.78,29.51,24.51,30.9,28.83,28.04,30.59,27.95	29.04	|||||||||MSCRQFSSSYLSRSGGGGGGGLGSGGSIRSSYSRFSSSGGG	GGGGRFSSSSGYGGGSSRVCGRGGGGSFGYSYGGGSGGGFSASSLGGGFG	|||||||||
P35568	P35568_p_1_1	7	680	686	S	P35568_3	26	668	693	0.803	0.803	SSSSSSS		33.28,35.09,36.22,37.45,36.51,38.52,35.69	36.22	SGGCSPDIGGGPSSSSSSSNAVPSGT	SS	35.06,37.5,37.61,31.39,47.69,46.92,34.36,39.66,39.94,39.64,36.3,43.42,33.28,35.09,36.22,37.45,36.51,38.52,35.69,36.12,37.73,41.59,41.74,37.84,35.48,35.58	37.475	MPMSPKSVSAPQQIINPIRRHPQRVDPNGYMMMSPSGGCSPDIGGGPSSS	SSSSNAVPSGTSYGKLWTNGVGGHHSHVLPHPKPPVESSGGKLLPCTGDY	TT	SS
P35568	P35568_p_2_1	6	877	882	Q	P35568_4	130	771	900	0.647	0.647	QQQQQQ		34.75,32.71,31.75,31.69,33.73,31.8	32.255	FKHTQRPGEPEEGARHQHLRLSTSSGRLLYAATADDSSSSTSSDSLGGGYCGARLEPSLPHPHHQVLQPHLPRKVDTAAQTNSRLARPTRLSLGDPKASTLPRAREQQQQQQPLLHPPEPKSPGEYVNIE		38.03,37.86,39.19,36.81,38.31,36.71,38.98,44.13,34.53,43.46,40.12,35.9,43.04,38.93,37.54,39.03,35.57,32.45,37.27,34.17,35.64,36.54,35.72,35.15,37.8,35.75,34.32,33.02,31.81,29.47,29.67,29.91,30.02,32.95,31.84,32.08,37.75,36.34,33.36,37.39,38.71,37.73,36.29,42.99,38.46,40.46,39.86,37.11,38.83,38.82,37.88,36.35,35.49,32.69,35.33,34.1,48.52,34.51,35.96,42.33,37.51,48.1,39.08,43.51,38.45,40.84,41.94,3…	38.01	PHPHHQVLQPHLPRKVDTAAQTNSRLARPTRLSLGDPKASTLPRAREQQQ	QQQPLLHPPEPKSPGEYVNIEFGSDQSGYLSGPVAFHSSPSVRCPSQLQP		S
P35568	P35568_p_3_1	7	1201	1207	P	P35568_7	53	1190	1242	0.549	0.549	PPPPPPP		47.83,57.93,52.73,48.1,65.81,48.93,41.77	48.93	QCPQECTPEPQPPPPPPPHQPLGSGESSSTRRSSEDLSAYASISFQKQPEDRQ		35.72,26.72,36.81,36.5,35.96,31.87,37.68,38.85,36.95,39.59,37.96,47.83,57.93,52.73,48.1,65.81,48.93,41.77,40.85,40.92,42.66,38.72,37.14,39.53,38.72,42.5,41.21,39.3,41.96,42.48,39.91,42.83,43.55,44.41,45.68,46.86,49.3,43.4,51.36,47.69,50.69,47.6,53.98,54.64,46.38,50.09,47.93,47.49,55.82,51.27,53.07,47.7,36.33	42.83	GELGGAPKEPAKLCGAAGGLENGLNYIDLDLVKDFKQCPQECTPEPQPPP	PPPPHQPLGSGESSSTRRSSEDLSAYASISFQKQPEDRQ|||||||||||		|||||||||||
P35637	P35637_p_1_1	10	166	175	G	P35637_1	286	1	286	0.536	0.536	GGGGGGGGGG		37.08,36.85,38.42,38.35,38.54,39.44,39.71,39.4,38.35,40.45	38.48	MASNDYTQQATQSYGAYPTQPGQGYSQQSSQPYGQQSYSGYSQSTDTSGYGQSSYSSYGQSQNTGYGTQSTPQGYGSTGGYGSSQSSQSSYGQQSSYPGYGQQPAPSSTSGSYGSSSQSSSYGQPQSGSYSQQPSYGGQQQSYGQQQSYNPPQGYGQQNQYNSSSGGGGGGGGGGNYGQDQSSMSSGGGSGGGYGNQDQSGGGGSGGYGQQDRGGRGRGGSGGGGGGGGGGYNRSSGGYEPRGRGGGRGGRGGMGGSDRGGFNKFGGPRDQGSRHDSEQDNSDNNT	S SS TTTT S GGG E	47.22,47.6,50.93,59.76,49.35,51.26,52.11,47.43,50.57,44.2,47.59,43.88,44.41,40.36,40.46,43.26,42.3,48.19,43.98,45.47,44.55,42.44,41.45,37.38,38.17,40.57,42.23,39.26,38.34,41.95,39.28,38.3,38.01,37.47,42.56,41.97,31.99,38.56,35.59,35.19,38.69,33.62,37.97,34.62,44.58,35.35,41.84,40.41,40.62,39.18,41.38,40.76,39.67,37.73,39.19,38.39,39.81,39.44,39.78,40.9,38.89,40.31,34.98,38.3,36.63,37.16,36.99,39.…	39.645	SYGQPQSGSYSQQPSYGGQQQSYGQQQSYNPPQGYGQQNQYNSSSGGGGG	GGGGGNYGQDQSSMSSGGGSGGGYGNQDQSGGGGSGGYGQQDRGGRGRGG
P35637	P35637_p_2_1	10	222	231	G	P35637_1	286	1	286	0.536	0.536	GGGGGGGGGG		39.86,37.85,40.21,40.46,44.12,41.07,38.34,42.48,37.88,41.75	40.335	MASNDYTQQATQSYGAYPTQPGQGYSQQSSQPYGQQSYSGYSQSTDTSGYGQSSYSSYGQSQNTGYGTQSTPQGYGSTGGYGSSQSSQSSYGQQSSYPGYGQQPAPSSTSGSYGSSSQSSSYGQPQSGSYSQQPSYGGQQQSYGQQQSYNPPQGYGQQNQYNSSSGGGGGGGGGGNYGQDQSSMSSGGGSGGGYGNQDQSGGGGSGGYGQQDRGGRGRGGSGGGGGGGGGGYNRSSGGYEPRGRGGGRGGRGGMGGSDRGGFNKFGGPRDQGSRHDSEQDNSDNNT	S SS TTTT S GGG E	47.22,47.6,50.93,59.76,49.35,51.26,52.11,47.43,50.57,44.2,47.59,43.88,44.41,40.36,40.46,43.26,42.3,48.19,43.98,45.47,44.55,42.44,41.45,37.38,38.17,40.57,42.23,39.26,38.34,41.95,39.28,38.3,38.01,37.47,42.56,41.97,31.99,38.56,35.59,35.19,38.69,33.62,37.97,34.62,44.58,35.35,41.84,40.41,40.62,39.18,41.38,40.76,39.67,37.73,39.19,38.39,39.81,39.44,39.78,40.9,38.89,40.31,34.98,38.3,36.63,37.16,36.99,39.…	39.645	YGQDQSSMSSGGGSGGGYGNQDQSGGGGSGGYGQQDRGGRGRGGSGGGGG	GGGGGYNRSSGGYEPRGRGGGRGGRGGMGGSDRGGFNKFGGPRDQGSRHD		S SS TTTT
P35637	P35637_p_3_1	7	413	419	G	P35637_2	50	375	424	0.633	0.633	GGGGGGG		42.65,34.53,38.11,36.52,38.8,43.72,54.13	38.8	FNRGGGNGRGGRGRGGPMGRGGYGGGGSGGGGRGGFPSGGGGGGGQQRAG	GGGTS TT	45.81,48.56,46.65,40.94,40.66,40.93,48.85,48.49,46.17,36.76,47.3,43.57,45.63,50.35,41.25,42.55,49.26,37.83,45.78,42.31,39.05,46.19,42.98,46.73,46.84,39.34,41.98,43.62,42.53,41.41,36.23,43.3,38.5,41.63,41.57,35.16,51.11,43.32,42.65,34.53,38.11,36.52,38.8,43.72,54.13,59.79,64.03,72.02,77.01,79.98	43.31	VSFATRRADFNRGGGNGRGGRGRGGPMGRGGYGGGGSGGGGRGGFPSGGG	GGGGQQRAGDWKCPNPTCENMNFSWRNECNQCKAPKPDGPGGGPGGSHMG	EEE SGGGTS	TT EE SSTTT EE TT SB TTT B TT S
P35659	P35659_p_1_1	7	41	47	E	P35659_1	61	1	61	0.441	0.441	EEEEEEE	SSGGGTG	44.38,45.54,44.11,45.06,45.95,47.38,46.64	45.54	MSASAPAAEGEGTPTQPASEKEPEMPGPREESEEEEDEDDEEEEEEEKEKSLIVEGKREKK	SSGGGTGGG	52.79,51.76,53.3,53.36,66.2,63.06,59.37,62.99,57.61,56.53,51.35,46.63,62.19,50.2,47.11,50.79,52.72,45.96,51.59,49.92,50.42,52.92,51.07,50.27,55.41,51.97,44.47,47.67,44.94,42.25,40.21,42.28,39.81,43.99,42.12,44.84,39.39,44.29,41.96,45.05,44.38,45.54,44.11,45.06,45.95,47.38,46.64,50.87,48.95,49.64,46.87,48.93,48.64,51.02,55.94,61.97,57.59,53.66,65.55,63.66,68.41	50.2	|||||||MSASAPAAEGEGTPTQPASEKEPEMPGPREESEEEEDEDDEEE	EEEEKEKSLIVEGKREKKKVERLTMQVSSLQREPFTIAQGKGQKLCEIER	||||||| SSG	GGTGGG SS TTTSHH
P35716	P35716_p_2_1	6	342	347	S	P35716_4	41	319	359	0.698	0.698	SSSSSS		42.74,43.24,44.11,41.7,44.27,41.07	42.99	TKQHPPPLAQPALSPASSRSVSTSSSSSSGSSSGSSGEDAD		46.05,52.48,47.05,48.78,58.58,57.13,64.82,53.16,43.33,49.01,48.47,44.33,49.43,52.89,55.77,48.98,48.21,46.34,47.1,48.96,46.86,44.93,41.12,42.74,43.24,44.11,41.7,44.27,41.07,39.17,38.67,43.19,39.85,37.37,38.27,38.76,42.47,47.95,48.58,54.09,48.31	46.86	DEVRAGATSGAGGGSRLYYSFKNITKQHPPPLAQPALSPASSRSVSTSSS	SSSGSSSGSSGEDADDLMFDLSLNFSQSAHSASEQQLGGGAAAGNLSLSL
P36915	P36915_p_2_1	8	552	559	E	P36915_2	61	547	607	0.534	0.534	EEEEEEEE		26.68,27.1,27.39,28.59,25.55,27.9,30.58,28.08	27.645	GPAGDEEEEEEEELSSSCEEEGEEDRDADEEGEGDEETPTSAPGSSLAGRNPYALLGEDEC	S TTS GGGGSS	31.11,30.62,28.62,27.92,28.73,26.68,27.1,27.39,28.59,25.55,27.9,30.58,28.08,31.89,27.75,27.13,25.82,24.67,29.25,27.77,29.01,30.07,34.29,31.27,34.63,29.36,33.67,31.5,33.61,27.9,29.37,28.34,27.08,27.86,28.47,29.75,26.01,27.94,24.93,26.5,28.12,26.58,36.08,27.38,29.31,27.13,32.95,34.78,33.72,34.89,50.44,45.47,42.5,52.33,43.26,39.51,33.1,33.45,34.58,36.69,36.43	29.31	LRLAVDGRLSLCFHPPGYSEQKGTWESHPETTELVVLQGRVGPAGDEEEE	EEEELSSSCEEEGEEDRDADEEGEGDEETPTSAPGSSLAGRNPYALLGED	HHHHHTTSS B TTHHHHHHHHHT HHHHHHHHHHH	S TTS GGGGSS
P37275	P37275_p_1_1	9	1063	1071	E	P37275_7	136	989	1124	0.434	0.434	EEEEEEEEE		40.24,38.12,38.07,37.94,35.95,38.33,35.0,37.97,36.27	37.97	EAEERDSTEQEEAGPEILSNEHVGARASPSQGDSDERESLTREEDEDSEKEEEEEDKEMEELQEEKECEKPQGDEEEEEEEEEVEEEEVEEAENEGEEAKTEGLMKDDRAESQASSLGQKVGESSEQVSEEKTNEA	HHHHHHHHHHTT	52.37,53.49,54.21,53.99,57.28,49.85,50.01,47.23,47.27,44.82,42.72,37.82,35.89,34.77,38.76,36.91,35.28,41.11,37.13,36.62,32.38,39.19,34.13,36.56,37.34,33.73,38.29,34.51,41.3,33.69,37.89,45.23,35.95,48.83,38.24,42.89,43.52,38.4,33.75,38.36,36.94,35.75,43.48,37.75,40.0,38.3,33.88,40.75,36.33,39.03,35.74,35.21,33.61,40.7,37.37,36.66,45.3,39.76,37.61,42.02,34.82,39.28,36.77,38.7,40.81,42.75,40.54,34.4…	39.025	PSQGDSDERESLTREEDEDSEKEEEEEDKEMEELQEEKECEKPQGDEEEE	EEEEEVEEEEVEEAENEGEEAKTEGLMKDDRAESQASSLGQKVGESSEQV
P40123	P40123_p_1_1	6	232	237	P	P40123_1	37	225	261	0.63	0.63	PPPPPP		37.57,41.7,42.29,43.14,51.48,43.94	42.715	LSSGPGLPPPPPPLPPPGPPPLFENEGKKEESSPSRS	HT SS HHHH	47.02,35.99,32.26,31.42,36.49,28.59,31.72,37.57,41.7,42.29,43.14,51.48,43.94,44.49,43.31,42.37,43.32,37.3,39.13,36.85,36.72,32.42,33.98,29.46,28.6,29.11,30.8,28.79,36.01,33.6,39.95,46.7,49.95,61.14,75.27,75.28,78.42	37.57	VKSYLNIWSELQAYIKEHHTTGLTWSKTGPVASTVSAFSVLSSGPGLPPP	PPPLPPPGPPPLFENEGKKEESSPSRSALFAQLNQGEAITKGLRHVTDDQ	HHHHHHHHHHHHHHHHHH TTS SSS B HHHHHHHHT SS	HHHHHHHHHH GGGGGGGS GGG
P42568	P42568_p_1_1	42	149	190	S	P42568_1	339	137	475	0.58	0.58	SSSSSSSSSSSSSSSSSSSSSSSSSSSSSSSSSSSSSSSSSS		39.01,36.68,38.35,40.86,39.39,42.51,40.34,42.35,41.9,37.9,43.59,39.16,44.56,41.04,45.55,39.23,41.5,41.03,40.85,40.66,40.65,41.44,41.91,44.15,43.6,45.1,46.73,44.48,47.92,44.03,47.87,44.2,45.6,45.95,47.48,46.17,45.23,43.83,44.72,43.67,42.24,42.67	42.59	KAGGDPNRSIHTSSSSSSSSSSSSSSSSSSSSSSSSSSSSSSSSSSSSSSSSSSTSFSKPHKLMKEHKEKPSKDSREHKSAFKEPSRDHNKSSKESSKKPKENKPLKEEKIVPKMAFKEPKPMSKEPKPDSNLLTITSGQDKKAPSKRPPISDSEELSAKKRKKSSSEALFKSFSSAPPLILTCSADKKQIKDKSHVKMGKVKIESETSEKKKSTLPPFDDIVDPNDSDVEENISSKSDSEQPSPASSSSSSSSSFTPSQTRQQGPLRSIMKDLHSDDNEEESDEVEDNDNDSEMERPVNRGGSRSRRVSLSDGSDSESSSASSPLHHEPPPPLLKTNN	HTT EE TTS S SS S	94.47,94.07,91.58,91.52,89.72,82.44,64.07,55.1,40.9,44.57,41.04,34.62,39.01,36.68,38.35,40.86,39.39,42.51,40.34,42.35,41.9,37.9,43.59,39.16,44.56,41.04,45.55,39.23,41.5,41.03,40.85,40.66,40.65,41.44,41.91,44.15,43.6,45.1,46.73,44.48,47.92,44.03,47.87,44.2,45.6,45.95,47.48,46.17,45.23,43.83,44.72,43.67,42.24,42.67,40.34,41.99,39.27,41.09,38.43,43.57,36.55,38.62,43.51,47.88,55.57,42.52,45.58,43.78,…	44.21	EKLTFNNPTEDFRRKLLKAGGDPNRSIHTSSSSSSSSSSSSSSSSSSSSS	SSSSSSSSSSSSSSSSSSSSSTSFSKPHKLMKEHKEKPSKDSREHKSAFK	EEEEEES HHHHHHHHHTT EE
P42568	P42568_p_2_1	9	383	391	S	P42568_1	339	137	475	0.58	0.58	SSSSSSSSS		40.09,40.54,36.76,38.66,35.81,41.74,38.34,44.14,43.08	40.09	KAGGDPNRSIHTSSSSSSSSSSSSSSSSSSSSSSSSSSSSSSSSSSSSSSSSSSTSFSKPHKLMKEHKEKPSKDSREHKSAFKEPSRDHNKSSKESSKKPKENKPLKEEKIVPKMAFKEPKPMSKEPKPDSNLLTITSGQDKKAPSKRPPISDSEELSAKKRKKSSSEALFKSFSSAPPLILTCSADKKQIKDKSHVKMGKVKIESETSEKKKSTLPPFDDIVDPNDSDVEENISSKSDSEQPSPASSSSSSSSSFTPSQTRQQGPLRSIMKDLHSDDNEEESDEVEDNDNDSEMERPVNRGGSRSRRVSLSDGSDSESSSASSPLHHEPPPPLLKTNN	HTT EE TTS S SS S	94.47,94.07,91.58,91.52,89.72,82.44,64.07,55.1,40.9,44.57,41.04,34.62,39.01,36.68,38.35,40.86,39.39,42.51,40.34,42.35,41.9,37.9,43.59,39.16,44.56,41.04,45.55,39.23,41.5,41.03,40.85,40.66,40.65,41.44,41.91,44.15,43.6,45.1,46.73,44.48,47.92,44.03,47.87,44.2,45.6,45.95,47.48,46.17,45.23,43.83,44.72,43.67,42.24,42.67,40.34,41.99,39.27,41.09,38.43,43.57,36.55,38.62,43.51,47.88,55.57,42.52,45.58,43.78,…	44.21	KVKIESETSEKKKSTLPPFDDIVDPNDSDVEENISSKSDSEQPSPASSSS	SSSSSFTPSQTRQQGPLRSIMKDLHSDDNEEESDEVEDNDNDSEMERPVN	TTS S	SS S
P42658	P42658_p_1_1	6	57	62	G	P42658_1	88	1	88	0.669	0.669	GGGGGG		38.42,37.07,36.59,36.91,34.61,35.63	36.75	MASLYQRFTGKINTSRSFPAPPEASHLLGGQGPEEDGGAGAKPLGPRAQAAAPRERGGGGGGAGGRPRFQYQARSDGDEEDELVGSNP	S	31.3,31.58,29.88,29.07,37.54,30.15,27.35,33.3,29.15,29.05,28.55,33.65,28.06,31.58,27.97,31.42,30.79,33.95,35.2,36.06,39.2,34.4,29.38,33.1,30.42,35.2,35.59,37.1,32.83,37.88,38.42,32.43,43.53,34.88,38.63,39.92,36.38,36.76,40.87,37.76,40.65,42.04,42.01,42.48,37.68,41.54,38.5,36.02,34.16,32.56,36.92,37.34,46.2,38.51,40.62,38.26,38.42,37.07,36.59,36.91,34.61,35.63,36.4,35.16,36.7,32.17,45.97,33.85,38.…	36.995	GKINTSRSFPAPPEASHLLGGQGPEEDGGAGAKPLGPRAQAAAPRERGGG	GGGAGGRPRFQYQARSDGDEEDELVGSNPPQRNWKGIAIALLVILVICSL	S	HHHHHHHHHHHHHHHHH
P42768	P42768_p_1_1	6	314	319	P	P42768_2	196	307	502	0.682	0.682	PPPPPP		58.75,51.7,58.12,59.44,56.39,54.89	57.255	MRRQEPLPPPPPPSRGGNQLPRPPIVGGNKGRSGPLPPVPLGIAPPPPTPRGPPPPGRGGPPPPPPPATGRSGPLPPPPPGAGGPPMPPPPPPPPPPPSSGNGPAPPPLPPALVPAGGLAPGGGRGALLDQIRQGIQLNKTPGAPESSALQPPPQSSEGLVGALMHVMQKRSRAIHSSDEGEDQAGDEDEDDEWDD	HHHHS S HHHHHHHHHH SSHHHHHHHHHHHHHHHHH SS	80.56,81.71,77.41,66.11,57.98,50.88,52.01,58.75,51.7,58.12,59.44,56.39,54.89,45.33,41.38,34.25,38.1,42.09,42.92,44.68,38.84,48.49,55.38,41.63,48.51,44.39,42.28,41.3,40.79,45.72,43.22,46.12,46.33,50.25,47.94,48.47,70.29,56.36,52.17,55.19,45.73,45.79,45.09,54.34,49.9,70.48,68.92,62.08,67.46,57.89,54.06,65.96,68.86,68.12,70.43,63.74,55.13,53.36,46.4,69.2,73.61,71.31,72.64,77.48,73.28,71.5,67.56,47.9…	53.81	LRSLFSRAGISEAQLTDAETSKLIYDFIEDQGGLEAVRQEMRRQEPLPPP	PPPSRGGNQLPRPPIVGGNKGRSGPLPPVPLGIAPPPPTPRGPPPPGRGG	HHHHHHHHT HHHHHSHHHHHHHHHHHHHTTHHHHHHHHHHHHS
P42768	P42768_p_2_1	7	367	373	P	P42768_2	196	307	502	0.682	0.682	PPPPPPP		73.61,71.31,72.64,77.48,73.28,71.5,67.56	72.64	MRRQEPLPPPPPPSRGGNQLPRPPIVGGNKGRSGPLPPVPLGIAPPPPTPRGPPPPGRGGPPPPPPPATGRSGPLPPPPPGAGGPPMPPPPPPPPPPPSSGNGPAPPPLPPALVPAGGLAPGGGRGALLDQIRQGIQLNKTPGAPESSALQPPPQSSEGLVGALMHVMQKRSRAIHSSDEGEDQAGDEDEDDEWDD	HHHHS S HHHHHHHHHH SSHHHHHHHHHHHHHHHHH SS	80.56,81.71,77.41,66.11,57.98,50.88,52.01,58.75,51.7,58.12,59.44,56.39,54.89,45.33,41.38,34.25,38.1,42.09,42.92,44.68,38.84,48.49,55.38,41.63,48.51,44.39,42.28,41.3,40.79,45.72,43.22,46.12,46.33,50.25,47.94,48.47,70.29,56.36,52.17,55.19,45.73,45.79,45.09,54.34,49.9,70.48,68.92,62.08,67.46,57.89,54.06,65.96,68.86,68.12,70.43,63.74,55.13,53.36,46.4,69.2,73.61,71.31,72.64,77.48,73.28,71.5,67.56,47.9…	53.81	SRGGNQLPRPPIVGGNKGRSGPLPPVPLGIAPPPPTPRGPPPPGRGGPPP	PPPPATGRSGPLPPPPPGAGGPPMPPPPPPPPPPPSSGNGPAPPPLPPAL		S
P42768	P42768_p_3_1	11	394	404	P	P42768_2	196	307	502	0.682	0.682	PPPPPPPPPPP		70.9,68.07,70.75,73.13,68.78,69.68,73.1,67.47,63.48,64.57,66.62	68.78	MRRQEPLPPPPPPSRGGNQLPRPPIVGGNKGRSGPLPPVPLGIAPPPPTPRGPPPPGRGGPPPPPPPATGRSGPLPPPPPGAGGPPMPPPPPPPPPPPSSGNGPAPPPLPPALVPAGGLAPGGGRGALLDQIRQGIQLNKTPGAPESSALQPPPQSSEGLVGALMHVMQKRSRAIHSSDEGEDQAGDEDEDDEWDD	HHHHS S HHHHHHHHHH SSHHHHHHHHHHHHHHHHH SS	80.56,81.71,77.41,66.11,57.98,50.88,52.01,58.75,51.7,58.12,59.44,56.39,54.89,45.33,41.38,34.25,38.1,42.09,42.92,44.68,38.84,48.49,55.38,41.63,48.51,44.39,42.28,41.3,40.79,45.72,43.22,46.12,46.33,50.25,47.94,48.47,70.29,56.36,52.17,55.19,45.73,45.79,45.09,54.34,49.9,70.48,68.92,62.08,67.46,57.89,54.06,65.96,68.86,68.12,70.43,63.74,55.13,53.36,46.4,69.2,73.61,71.31,72.64,77.48,73.28,71.5,67.56,47.9…	53.81	IAPPPPTPRGPPPPGRGGPPPPPPPATGRSGPLPPPPPGAGGPPMPPPPP	PPPPPPSSGNGPAPPPLPPALVPAGGLAPGGGRGALLDQIRQGIQLNKTP	S	HHHHHHHHHH
P43363	P43363_p_1_1	9	54	62	S	P43363_1	131	1	131	0.713	0.713	SSSSSSSSS	S	33.75,36.76,34.42,35.1,31.28,34.2,34.13,35.12,37.8	34.42	MPRAPKRQRCMPEEDLQSQSETQGLEGAQAPLAVEEDASSSTSTSSSFPSSFPSSSSSSSSSCYPLIPSTPEEVSADDETPNPPQSAQIACSSPSVVASLPLDQSDEGSSSQKEESPSTLQVLPDSESLPR	S SS H	40.34,50.41,46.47,52.74,51.43,43.02,49.78,44.64,41.15,41.12,39.15,51.49,41.2,43.11,47.11,40.45,40.37,43.01,41.5,44.28,44.4,41.39,43.1,38.45,43.34,43.28,42.2,42.99,41.49,45.7,45.58,46.86,44.66,55.84,49.77,50.94,41.77,47.57,41.21,42.79,41.27,44.74,39.81,40.57,36.64,38.06,39.86,33.07,37.05,35.48,37.92,40.07,38.95,33.75,36.76,34.42,35.1,31.28,34.2,34.13,35.12,37.8,36.46,44.07,45.14,44.85,45.14,43.26,…	41.86	QRCMPEEDLQSQSETQGLEGAQAPLAVEEDASSSTSTSSSFPSSFPSSSS	SSSSSCYPLIPSTPEEVSADDETPNPPQSAQIACSSPSVVASLPLDQSDE		S SS
P43699	P43699_p_1_1	8	234	241	G	P43699_1	76	219	294	0.664	0.664	GGGGGGGG	TS	54.8,50.86,49.01,45.18,42.7,40.64,41.11,44.84	45.01	QAKDKAAQQQLQQDSGGGGGGGGTGCPQQQQAQQQSPRRVAVPVLVKDGKPCQAGAPAPGAASLQGHAQQQAQHQA	HHHHHHHHHHHHHHTTS SS	90.86,88.6,88.39,87.16,85.03,83.06,84.55,81.26,79.14,74.53,72.51,67.05,62.35,60.0,59.7,54.8,50.86,49.01,45.18,42.7,40.64,41.11,44.84,47.31,39.07,43.4,42.76,41.84,40.12,47.11,46.88,45.68,47.77,53.88,52.86,46.63,57.75,51.71,50.47,59.94,56.24,53.34,62.37,60.41,56.12,62.98,51.89,49.79,38.76,50.29,55.97,41.15,51.17,42.87,46.65,49.71,46.78,53.23,42.18,44.01,43.48,44.31,42.97,47.79,41.13,42.9,51.7,40.48…	49.75	APEREHLASMIHLTPTQVKIWFQNHRYKMKRQAKDKAAQQQLQQDSGGGG	GGGGTGCPQQQQAQQQSPRRVAVPVLVKDGKPCQAGAPAPGAASLQGHAQ	HHHHHHHHHHTT HHHHHHHHHHHHHHHHHHHHHHHHHHHHHHHTTS	SS
P46060	P46060_p_1_1	6	363	368	E	P46060_1	74	357	430	0.362	0.362	EEEEEE	T	70.39,60.72,49.52,50.93,37.48,43.23	50.225	LSDDEDEEEEEEGEEEEEEAEEEEEEDEEEEEEEEEEEEEEPQQRGQGEKSATPSRKILDPNTGEPAPVLSSPP	TT TTTHHHHHHHHHHHHHHHHHHHHHHSSS	96.55,93.91,93.84,93.62,85.09,82.94,70.39,60.72,49.52,50.93,37.48,43.23,40.09,45.67,44.55,45.79,46.82,47.11,46.55,48.39,49.72,47.07,44.92,45.51,45.66,39.1,45.15,42.32,43.75,36.48,40.75,41.15,36.22,36.97,41.19,38.42,35.34,35.14,32.55,30.34,29.97,30.82,29.55,25.78,20.21,25.79,20.38,24.49,23.66,20.47,21.65,23.85,18.97,27.37,20.86,21.14,26.92,21.59,28.24,28.38,32.98,25.25,33.54,23.85,31.06,31.37,28.2…	36.35	AMADKAELEKLDLNGNTLGEEGCEQLQEVLEGFNMAKVLASLSDDEDEEE	EEEGEEEEEEAEEEEEEDEEEEEEEEEEEEEEPQQRGQGEKSATPSRKIL	HTTT TT EEE TTSB HHHHHHHHHHHHHHTT TTTB TT	TTTHHHHHHHHHHHHHHHHHHHHHHSSS
P46060	P46060_p_2_1	6	370	375	E	P46060_1	74	357	430	0.362	0.362	EEEEEE	THHHHH	45.67,44.55,45.79,46.82,47.11,46.55	46.17	LSDDEDEEEEEEGEEEEEEAEEEEEEDEEEEEEEEEEEEEEPQQRGQGEKSATPSRKILDPNTGEPAPVLSSPP	TT TTTHHHHHHHHHHHHHHHHHHHHHHSSS	96.55,93.91,93.84,93.62,85.09,82.94,70.39,60.72,49.52,50.93,37.48,43.23,40.09,45.67,44.55,45.79,46.82,47.11,46.55,48.39,49.72,47.07,44.92,45.51,45.66,39.1,45.15,42.32,43.75,36.48,40.75,41.15,36.22,36.97,41.19,38.42,35.34,35.14,32.55,30.34,29.97,30.82,29.55,25.78,20.21,25.79,20.38,24.49,23.66,20.47,21.65,23.85,18.97,27.37,20.86,21.14,26.92,21.59,28.24,28.38,32.98,25.25,33.54,23.85,31.06,31.37,28.2…	36.35	LEKLDLNGNTLGEEGCEQLQEVLEGFNMAKVLASLSDDEDEEEEEEGEEE	EEEAEEEEEEDEEEEEEEEEEEEEEPQQRGQGEKSATPSRKILDPNTGEP	EEE TTSB HHHHHHHHHHHHHHTT TTTB TT TTTHH	HHHHHHHHHHHHHHHHHHHHSSS
P46060	P46060_p_3_1	6	377	382	E	P46060_1	74	357	430	0.362	0.362	EEEEEE	HHHHHH	49.72,47.07,44.92,45.51,45.66,39.1	45.585	LSDDEDEEEEEEGEEEEEEAEEEEEEDEEEEEEEEEEEEEEPQQRGQGEKSATPSRKILDPNTGEPAPVLSSPP	TT TTTHHHHHHHHHHHHHHHHHHHHHHSSS	96.55,93.91,93.84,93.62,85.09,82.94,70.39,60.72,49.52,50.93,37.48,43.23,40.09,45.67,44.55,45.79,46.82,47.11,46.55,48.39,49.72,47.07,44.92,45.51,45.66,39.1,45.15,42.32,43.75,36.48,40.75,41.15,36.22,36.97,41.19,38.42,35.34,35.14,32.55,30.34,29.97,30.82,29.55,25.78,20.21,25.79,20.38,24.49,23.66,20.47,21.65,23.85,18.97,27.37,20.86,21.14,26.92,21.59,28.24,28.38,32.98,25.25,33.54,23.85,31.06,31.37,28.2…	36.35	GNTLGEEGCEQLQEVLEGFNMAKVLASLSDDEDEEEEEEGEEEEEEAEEE	EEEDEEEEEEEEEEEEEEPQQRGQGEKSATPSRKILDPNTGEPAPVLSSP	TSB HHHHHHHHHHHHHHTT TTTB TT TTTHHHHHHHHH	HHHHHHHHHHHHHSSS
P46060	P46060_p_4_1	14	384	397	E	P46060_1	74	357	430	0.362	0.362	EEEEEEEEEEEEEE	HHHHHHHHHSSS	42.32,43.75,36.48,40.75,41.15,36.22,36.97,41.19,38.42,35.34,35.14,32.55,30.34,29.97	36.725	LSDDEDEEEEEEGEEEEEEAEEEEEEDEEEEEEEEEEEEEEPQQRGQGEKSATPSRKILDPNTGEPAPVLSSPP	TT TTTHHHHHHHHHHHHHHHHHHHHHHSSS	96.55,93.91,93.84,93.62,85.09,82.94,70.39,60.72,49.52,50.93,37.48,43.23,40.09,45.67,44.55,45.79,46.82,47.11,46.55,48.39,49.72,47.07,44.92,45.51,45.66,39.1,45.15,42.32,43.75,36.48,40.75,41.15,36.22,36.97,41.19,38.42,35.34,35.14,32.55,30.34,29.97,30.82,29.55,25.78,20.21,25.79,20.38,24.49,23.66,20.47,21.65,23.85,18.97,27.37,20.86,21.14,26.92,21.59,28.24,28.38,32.98,25.25,33.54,23.85,31.06,31.37,28.2…	36.35	LQEVLEGFNMAKVLASLSDDEDEEEEEEGEEEEEEAEEEEEEDEEEEEEE	EEEEEEEPQQRGQGEKSATPSRKILDPNTGEPAPVLSSPPPADVSTFLAF	HHHHHHHTT TTTB TT TTTHHHHHHHHHHHHHHHHHHHH	HHSSS HHHHHHS
P46087	P46087_p_1_1	6	113	118	E	P46087_1	211	1	211	0.573	0.573	EEEEEE		34.66,39.09,34.06,37.47,36.66,34.06	35.66	MGRKLDPTKEKRGPGRKARKQKGAETELVRFLPAVSDENSKRLSSRARKRAAKRRLGSVEAPKTNKSPEAKPLPGKLPKGISAGAVQTAGKKGPQSLFNAPRGKKRPAPGSDEEEEEEDSEEDGMVNHGDLWGSEDDADTVDDYGADSNSEDEEEGEALLPIERAARKQKAREAAAGIQWSEEETEDEEEEKEVTPESGPPKVEEADGGLQ	S THHHHTTTS HHHHHHHHHHHTT HHHHHHHHHHHHHHTT	41.54,38.26,46.09,43.37,48.17,51.78,49.74,49.71,42.69,42.44,44.6,39.48,50.67,45.08,43.1,50.28,46.47,47.09,50.58,48.83,53.96,54.99,47.26,47.21,56.67,54.91,55.07,53.27,57.44,58.87,49.13,47.01,40.38,45.77,41.85,37.01,37.1,32.79,34.71,42.37,45.69,46.85,62.78,77.34,71.99,73.3,73.56,71.38,74.14,72.38,69.82,67.93,69.42,63.48,55.65,53.53,46.25,41.43,37.54,37.57,33.29,35.52,31.46,33.19,36.96,34.83,33.37,3…	37.47	KSPEAKPLPGKLPKGISAGAVQTAGKKGPQSLFNAPRGKKRPAPGSDEEE	EEEDSEEDGMVNHGDLWGSEDDADTVDDYGADSNSEDEEEGEALLPIERA		HHHHH
P46379	P46379_p_1_1	12	657	668	P	P46379_6	42	651	692	0.661	0.661	PPPPPPPPPPPP		33.68,37.61,38.4,42.0,35.66,44.25,45.9,43.1,43.9,47.6,45.59,42.68	42.89	QATQTAPPPPPPPPPPPPAPEQQTMPPPGSPSGGAGSPGGLG		34.97,28.11,28.96,29.69,29.83,32.71,33.68,37.61,38.4,42.0,35.66,44.25,45.9,43.1,43.9,47.6,45.59,42.68,39.17,37.74,34.96,34.99,34.97,31.52,35.44,38.31,48.79,39.13,34.8,33.38,39.3,33.4,31.4,31.53,30.03,30.37,31.1,37.42,27.91,28.72,29.62,27.06	34.97	NLLGPAGPGAGGSGVASPTITVAMPGVPAFLQGMTDFLQATQTAPPPPPP	PPPPPPAPEQQTMPPPGSPSGGAGSPGGLGLESLSPEFFTSVVQGVLSSL	SSS SSSS S	HHHHHHHHHHHHHHH
P46531	P46531_p_1_1	6	2410	2415	P	P46531_3	69	2379	2447	0.707	0.707	PPPPPP		40.18,42.53,45.78,40.51,48.03,41.05	41.79	LVQTQQVQPQNLQMQQQNLQPANIQQQQSLQPPPPPPQPHLGVSSAASGHLGRSFLSGEPSQADVQPLG	S S SS S	31.29,30.77,31.38,26.43,33.54,23.75,33.21,34.03,29.97,26.86,26.55,28.09,26.24,27.28,30.98,30.27,37.31,29.81,32.27,40.18,33.15,29.56,29.91,36.55,30.81,28.4,26.54,29.0,26.07,29.76,37.59,40.18,42.53,45.78,40.51,48.03,41.05,30.89,44.84,27.86,33.36,36.99,31.16,25.95,27.87,20.95,23.62,50.21,39.42,27.66,26.38,32.07,26.16,24.05,26.12,28.66,28.02,32.29,42.38,34.2,29.11,26.68,26.15,25.34,30.43,33.42,37.38,…	30.43	MSYQGLPSTRLATQPHLVQTQQVQPQNLQMQQQNLQPANIQQQQSLQPPP	PPPQPHLGVSSAASGHLGRSFLSGEPSQADVQPLGPSSLAVHTILPQESP	SS S	S S SS S SS
P47974	P47974_p_2_1	7	395	401	Q	P47974_3	98	397	494	0.763	0.763	QQQQQQQ	HHHHHHH	77.73,75.86,73.59,68.51,66.08,61.38,56.95	68.51	QQQQQGLAPPAQPPAPPSATLPAGAAAPPSPPFSFQLPRRLSDSPVFDAPPSPPDSLSDRDSYLSGSLSSGSLSGSESPSLDPGRRLPIFSRLSISDD	HHHHHT TT	73.59,68.51,66.08,61.38,56.95,49.7,48.99,51.62,53.16,53.25,51.66,52.96,60.33,55.67,53.5,62.68,53.25,40.11,47.73,44.11,51.62,44.94,39.89,44.06,44.23,46.83,48.08,57.24,54.17,45.14,63.57,52.51,50.41,48.32,38.36,44.22,42.8,43.26,46.85,36.32,45.07,40.27,44.7,46.69,60.65,51.84,50.2,52.28,60.76,65.94,59.5,48.93,68.01,61.45,35.03,46.61,37.84,50.18,40.44,38.26,40.28,47.18,43.79,45.29,45.19,41.55,44.28,48.…	50.045	APCAACSSASCANNAFAFGPELSSLITPLAIQTHNFAAVAAAAYYRSQQQ	QQQQGLAPPAQPPAPPSATLPAGAAAPPSPPFSFQLPRRLSDSPVFDAPP	TT S S THHHHHHHHHHHHHHHH	HHHHT
P48023	P48023_p_1_1	9	45	53	P	P48023_1	52	20	71	0.719	0.719	PPPPPPPPP		63.2,65.59,65.5,69.27,73.71,69.45,68.82,75.34,70.94	69.27	SSPWAPPGTVLPCPTSVPRRPGQRRPPPPPPPPPLPPPPPPPPLPPLPLPPL	S	42.16,43.89,42.94,43.08,42.29,48.41,45.12,45.3,43.56,48.88,49.09,40.07,44.89,46.09,46.8,47.18,55.85,50.84,44.93,51.86,46.71,48.36,51.6,50.17,57.71,63.2,65.59,65.5,69.27,73.71,69.45,68.82,75.34,70.94,71.34,76.4,75.8,70.14,75.94,76.21,70.68,74.39,69.14,68.94,67.37,64.18,64.28,57.7,59.82,58.22,53.95,53.0	56.775	||MQQPFNYPYPQIYWVDSSASSPWAPPGTVLPCPTSVPRRPGQRRPPPP	PPPPPLPPPPPPPPLPPLPLPPLKKRGNHSTGLCLLVMFFMVLVALVGLG	|| S	HHHHHHHHHHHHHHHHHHHHHH
P48023	P48023_p_2_1	8	55	62	P	P48023_1	52	20	71	0.719	0.719	PPPPPPPP		76.4,75.8,70.14,75.94,76.21,70.68,74.39,69.14	75.095	SSPWAPPGTVLPCPTSVPRRPGQRRPPPPPPPPPLPPPPPPPPLPPLPLPPL	S	42.16,43.89,42.94,43.08,42.29,48.41,45.12,45.3,43.56,48.88,49.09,40.07,44.89,46.09,46.8,47.18,55.85,50.84,44.93,51.86,46.71,48.36,51.6,50.17,57.71,63.2,65.59,65.5,69.27,73.71,69.45,68.82,75.34,70.94,71.34,76.4,75.8,70.14,75.94,76.21,70.68,74.39,69.14,68.94,67.37,64.18,64.28,57.7,59.82,58.22,53.95,53.0	56.775	YPQIYWVDSSASSPWAPPGTVLPCPTSVPRRPGQRRPPPPPPPPPLPPPP	PPPPLPPLPLPPLKKRGNHSTGLCLLVMFFMVLVALVGLGLGMFQLFHLQ	S	HHHHHHHHHHHHHHHHHHHHHHHHHHHHHHHH
P48634	P48634_p_1_1	6	1355	1360	G	P48634_3	1036	740	1775	0.616	0.616	GGGGGG		32.86,32.85,30.59,34.77,34.33,35.08	33.595	PLDFYPPGVHPSGLVPRERSDSGGSSSEPFDRHAPAMLRERGTPPVDPKLAWVGDVFTATPAEPRPLTSPLRQAADEDDKGMRSETPPVPPPPPYLASYPGFPENGAPGPPISRFPLEEPGPRPLPWPPGSDEVAKIQTPPPKKEPPKEETAQLTGPEAGRKPARGVGSGGQGPPPPRRESRTETRWGPRPGSSRRGIPPEEPGAPPRRAGPIKKPPPPTKVEELPPKPLEQGDETPKPPKPDPLKITKGKLGGPKETPPNGNLSPAPRLRRDYSYERVGPTSCRGRGRGEYFARGRGFRGTYGGRGRGARSREFRSYREFRGDDGRGGGTGGPNHPPAPRGRTASETRSEGSEYEEIPKRRRQRGSETGSETHESDLAPSDKEAPTPKEGTLTQVPLA…	B EE S S SS S SS S S S SS B S SS S S TT SS HHHHHHHHTTTSSSSS S S SS S S B SS S S SS E S S S HHHHHHHHHHHTTS S S S S S S S S SS S	49.83,42.19,50.41,47.73,33.17,37.09,39.61,34.59,36.27,33.91,40.8,37.98,37.8,46.55,44.49,43.56,45.98,43.85,38.5,48.79,36.57,33.77,36.88,30.58,44.01,28.22,31.01,33.25,46.06,37.55,39.13,33.16,33.63,31.25,38.84,35.7,42.44,40.66,39.55,37.36,32.98,36.34,41.71,43.94,41.43,34.83,32.58,42.19,32.06,45.62,37.03,28.32,27.64,29.16,31.73,35.27,33.03,31.66,38.91,27.32,33.47,24.72,28.82,45.1,38.14,45.94,38.96,36…	36.335	DLSNQNSDQANEEWETASESSDFTSERRGDKEAPPPVLLTPKAVGTPGGG	GGGAVPGISAMSRGDLSQRAKDLSKRSFSSQRPGMERQNRRPGPGGKAGS	S	S B SS S S SS
P48634	P48634_p_2_1	6	1413	1418	G	P48634_3	1036	740	1775	0.616	0.616	GGGGGG	E	39.68,40.34,36.35,37.25,37.74,42.52	38.71	PLDFYPPGVHPSGLVPRERSDSGGSSSEPFDRHAPAMLRERGTPPVDPKLAWVGDVFTATPAEPRPLTSPLRQAADEDDKGMRSETPPVPPPPPYLASYPGFPENGAPGPPISRFPLEEPGPRPLPWPPGSDEVAKIQTPPPKKEPPKEETAQLTGPEAGRKPARGVGSGGQGPPPPRRESRTETRWGPRPGSSRRGIPPEEPGAPPRRAGPIKKPPPPTKVEELPPKPLEQGDETPKPPKPDPLKITKGKLGGPKETPPNGNLSPAPRLRRDYSYERVGPTSCRGRGRGEYFARGRGFRGTYGGRGRGARSREFRSYREFRGDDGRGGGTGGPNHPPAPRGRTASETRSEGSEYEEIPKRRRQRGSETGSETHESDLAPSDKEAPTPKEGTLTQVPLA…	B EE S S SS S SS S S S SS B S SS S S TT SS HHHHHHHHTTTSSSSS S S SS S S B SS S S SS E S S S HHHHHHHHHHHTTS S S S S S S S S SS S	49.83,42.19,50.41,47.73,33.17,37.09,39.61,34.59,36.27,33.91,40.8,37.98,37.8,46.55,44.49,43.56,45.98,43.85,38.5,48.79,36.57,33.77,36.88,30.58,44.01,28.22,31.01,33.25,46.06,37.55,39.13,33.16,33.63,31.25,38.84,35.7,42.44,40.66,39.55,37.36,32.98,36.34,41.71,43.94,41.43,34.83,32.58,42.19,32.06,45.62,37.03,28.32,27.64,29.16,31.73,35.27,33.03,31.66,38.91,27.32,33.47,24.72,28.82,45.1,38.14,45.94,38.96,36…	36.335	SAMSRGDLSQRAKDLSKRSFSSQRPGMERQNRRPGPGGKAGSSGSSSGGG	GGGPGGRTGPGRGDKRSWPSPKNRSRPPEERPPGLPLPPPPPSSSAVFRL	B SS S S SS E	S
P48751	P48751_p_1_1	10	136	145	E	P48751_1	316	1	316	0.609	0.609	EEEEEEEEEE		29.14,28.54,25.69,25.86,24.15,24.63,24.71,25.05,27.71,25.59	25.64	MANGVIPPPGGASPLPQVRVPLEEPPLSPDVEEEDDDLGKTLAVSRFGDLISKPPAWDPEKPSRSYSERDFEFHRHTSHHTHHPLSARLPPPHKLRRLPPTSARHTRRKRKKEKTSAPPSEGTPPIQEEGGAGVDEEEEEEEEEEGESEAEPVEPPHSGTPQKAKFSIGSDEDDSPGLPGRAAVTKPLPSVGPHTDKSPQHSSSSPSPRARASRLAGEKSRPWSPSASYDLRERLCPGSALGNPGGPEQQVPTDEAEAQMLGSADLDDMKSHRLEDNPGVRRHLVKKPSRTQGGRGSPSGLAPILRRKKKKKKLDR	SSSHHHHHHHHT TTHHHHHH TTS HHHHHHHHHH GGGG S TTS HHHHHHS HHHHHHHHHTT	34.42,36.07,33.26,31.98,34.75,33.15,33.98,36.74,34.55,31.2,30.05,33.12,31.69,35.13,30.43,32.09,29.51,29.0,26.85,28.95,30.73,28.83,27.06,27.76,33.42,33.97,29.76,27.15,32.82,33.49,35.77,34.41,37.57,36.26,37.51,42.38,41.15,31.77,34.59,43.68,38.82,35.8,35.61,37.8,36.64,37.63,31.71,34.68,40.4,31.62,34.73,31.68,30.4,38.35,36.28,35.75,29.24,37.16,40.37,38.11,31.89,38.09,36.4,38.39,38.46,51.48,55.79,52.3…	30.725	PPHKLRRLPPTSARHTRRKRKKEKTSAPPSEGTPPIQEEGGAGVDEEEEE	EEEEEGESEAEPVEPPHSGTPQKAKFSIGSDEDDSPGLPGRAAVTKPLPS
P48751	P48751_p_2_1	6	308	313	K	P48751_1	316	1	316	0.609	0.609	KKKKKK		38.3,40.32,39.8,43.7,51.99,55.29	42.01	MANGVIPPPGGASPLPQVRVPLEEPPLSPDVEEEDDDLGKTLAVSRFGDLISKPPAWDPEKPSRSYSERDFEFHRHTSHHTHHPLSARLPPPHKLRRLPPTSARHTRRKRKKEKTSAPPSEGTPPIQEEGGAGVDEEEEEEEEEEGESEAEPVEPPHSGTPQKAKFSIGSDEDDSPGLPGRAAVTKPLPSVGPHTDKSPQHSSSSPSPRARASRLAGEKSRPWSPSASYDLRERLCPGSALGNPGGPEQQVPTDEAEAQMLGSADLDDMKSHRLEDNPGVRRHLVKKPSRTQGGRGSPSGLAPILRRKKKKKKLDR	SSSHHHHHHHHT TTHHHHHH TTS HHHHHHHHHH GGGG S TTS HHHHHHS HHHHHHHHHTT	34.42,36.07,33.26,31.98,34.75,33.15,33.98,36.74,34.55,31.2,30.05,33.12,31.69,35.13,30.43,32.09,29.51,29.0,26.85,28.95,30.73,28.83,27.06,27.76,33.42,33.97,29.76,27.15,32.82,33.49,35.77,34.41,37.57,36.26,37.51,42.38,41.15,31.77,34.59,43.68,38.82,35.8,35.61,37.8,36.64,37.63,31.71,34.68,40.4,31.62,34.73,31.68,30.4,38.35,36.28,35.75,29.24,37.16,40.37,38.11,31.89,38.09,36.4,38.39,38.46,51.48,55.79,52.3…	30.725	LGSADLDDMKSHRLEDNPGVRRHLVKKPSRTQGGRGSPSGLAPILRRKKK	KKKLDRRPHEVFVELNELMLDRSQEPHWRETARWIKFEEDVEEETERWGK	S HHHHHHHHHTT	EEEEEEEEEE TTS EEEEEEEEESSSEEEEETTTTEE
P49137	P49137_p_1_1	6	35	40	P	P49137_1	43	1	43	0.689	0.689	PPPPPP		66.43,68.6,64.35,60.88,57.46,47.61	62.615	MLSNSQGQSPPVPFPAPAPPPQPPTPALPHPPAQPPPPPPQQF		40.22,42.0,38.44,42.66,45.12,41.34,40.72,47.34,45.3,62.93,52.32,49.21,68.39,50.3,64.0,66.03,65.97,70.04,72.13,71.65,72.62,65.28,68.69,68.86,57.4,62.19,58.23,52.2,62.75,58.35,59.28,62.34,61.43,56.06,66.43,68.6,64.35,60.88,57.46,47.61,43.33,35.04,36.49	58.35	|||||||||||||MLSNSQGQSPPVPFPAPAPPPQPPTPALPHPPAQPPP	PPPQQFPQFHVKSGLQIKKNAIIDDYKVTSQVLGLGINGKVLQIFNKRTQ	|||||||||||||	TT B S HHHHEEEEEEEEEEETTEEEEEEEETTT
P49639	P49639_p_1_1	10	65	74	H	P49639_1	23	61	83	0.452	0.452	HHHHHHHHHH		53.38,48.27,57.2,50.55,49.19,57.04,49.18,59.36,50.26,64.95	51.965	IGSPHHHHHHHHHHPQPATYQTS		46.06,47.75,53.69,53.03,53.38,48.27,57.2,50.55,49.19,57.04,49.18,59.36,50.26,64.95,53.7,52.94,48.8,39.79,52.34,42.44,46.71,40.79,46.96	50.26	SGTCSARAYPSDHRITTFQSCAVSANSCGGDDRFLVGRGVQIGSPHHHHH	HHHHHPQPATYQTSGNLGVSYSHSSCGPSYGSQNFSAPYSPYALNQEADV
P49715	P49715_p_2_1	7	183	189	P	P49715_2	24	178	201	0.624	0.624	PPPPPPP		69.16,70.65,75.2,75.2,71.14,70.24,65.1	70.65	LFPYQPPPPPPPSHPHPHPPPAHL	TS S	68.12,61.13,63.17,48.79,54.04,69.16,70.65,75.2,75.2,71.14,70.24,65.1,52.43,53.01,46.59,47.78,46.58,48.16,63.77,59.79,55.32,49.04,49.86,51.54	57.555	AGYLDGRLEPLYERVGAPALRPLVIKQEPREEDEAKQLALAGLFPYQPPP	PPPPSHPHPHPPPAHLAAPHLQFQIAHCGQTTMHLQPGHPTPPPTPVPSP	THHHHHHHHHHTTS	SSHHHHHHHHHHHT TTS
P49750	P49750_p_1_1	7	208	214	S	P49750_1	381	1	381	0.637	0.637	SSSSSSS		25.97,27.12,25.81,25.72,24.91,24.74,27.36	25.81	MYPNWGRYGGSSHYPPPPVPPPPPVALPEASPGPGYSSSTTPAAPSSSGFMSFREQHLAQLQQLQQMHQKQMQCVLQPHHLPPPPLPPPPVMPGGGYGDWQPPPPPMPPPPGPALSYQKQQQYKHQMLHHQRDGPPGLVPMELESPPESPPVPPGSYMPPSQSYMPPPQPPPSYYPPTSSQPYLPPAQPSPSQSPPSQSYLAPTPSYSSSSSSSQSYLSHSQSYLPSSQASPSRPSQGHSKSQLLAPPPPSAPPGNKTTVQQEPLESGAKNKSTEQQQAAPEPDPSTMTPQEQQQYWYRQHLLSLQQRTKVHLPGHKKGPVVAKDTPEPVKEEVTVPATSQVPESPSSEEPPLPPPNEEVPPPLPPEEPQSEDPEEDARLK	HHHHHHHHHHHHHHHHHHHHHHHHS S S GGGS HHHHHHHHHHHHHHHHHHHHHHTSS B SS HHHHHHHH	33.93,29.05,46.16,36.56,28.03,34.06,33.29,30.5,31.04,30.46,29.61,31.27,32.02,31.74,27.67,38.85,33.63,41.59,36.23,40.47,36.35,37.21,39.19,35.98,35.44,33.93,39.39,36.52,37.03,35.84,42.4,39.68,44.1,38.36,30.49,29.42,29.83,28.64,29.03,26.35,35.8,39.62,24.54,27.24,37.07,26.9,27.34,29.73,36.01,36.1,46.55,53.79,57.49,55.7,70.85,76.04,70.1,79.59,79.68,76.92,79.11,83.22,80.73,79.31,78.75,80.85,75.11,73.44…	34.31	SQSYMPPPQPPPSYYPPTSSQPYLPPAQPSPSQSPPSQSYLAPTPSYSSS	SSSSQSYLSHSQSYLPSSQASPSRPSQGHSKSQLLAPPPPSAPPGNKTTV
P49750	P49750_p_2_1	8	1547	1554	P	P49750_6	105	1469	1573	0.647	0.647	PPPPPPPP		34.77,47.57,34.36,34.08,42.09,35.02,42.36,29.76	34.895	QKEQLQKMKDFGSEPQMADHLPPQESRLQNTSSRPGMYPPPGSYRPPPPMGKPPGSIVRPSAPPARSSVPVTRPPVPIPPPPPPPPLPPPPPVIKPQTSAVEQER	HHHHHHHHHHSSS S	77.1,77.55,77.71,73.23,71.55,71.71,70.78,56.03,60.16,52.32,45.6,33.57,31.49,27.13,32.15,26.9,33.81,35.33,33.08,29.16,31.5,44.48,34.07,28.99,24.98,26.15,24.74,29.56,27.83,26.02,26.81,41.93,44.63,35.59,33.81,36.41,34.96,37.47,38.84,46.03,35.82,38.86,31.01,27.71,34.99,29.27,31.62,38.14,34.73,36.05,35.55,37.8,49.83,45.12,44.44,44.36,40.34,41.64,28.31,33.87,35.59,26.06,34.07,35.74,28.28,28.17,34.2,30.…	34.36	SRPGMYPPPGSYRPPPPMGKPPGSIVRPSAPPARSSVPVTRPPVPIPPPP	PPPPLPPPPPVIKPQTSAVEQERWDEDSFYGLWDTNDEQGLNSEFKSETA	S	SSSSS
P49756	P49756_p_1_1	6	584	589	E	P49756_5	191	498	688	0.472	0.472	EEEEEE	HHHHHH	54.64,54.23,52.13,52.93,58.41,58.4	54.435	EFLEDYDDDRDDPKYYRGSALQKRLRDREKEMEADERDRKREKEELEEIRQRLLAEGHPDPDAELQRMEQEAERRRQPQIKQEPESEEEEEEKQEKEEKREEPMEEEEEPEQKPCLKPTLRPISSAPSVSSASGNATPNTPGDESPCGIIIPHENSPDQQQPEEHRPKIGLSLKLGASNSPGQPNSVKRKK	HHHHH HHHH HHHHSHHHHHHHHHHHHHHHHHHHHHHHHHHHHHHHHHHHHHHHT S HHHHHHHHHHHHHHHHS HHHHHHHHHHHHTT	87.73,89.21,87.28,89.5,86.08,88.59,85.36,86.26,81.75,86.43,85.65,86.35,79.25,82.41,86.1,85.96,82.34,88.16,88.71,87.02,89.42,90.19,92.13,88.85,92.99,93.35,94.73,92.8,95.24,95.96,95.38,94.1,95.54,93.83,93.15,95.15,94.02,93.33,89.72,93.7,92.02,88.43,89.28,92.46,90.41,84.84,86.48,89.62,84.31,80.64,85.22,84.23,81.3,81.71,84.02,83.99,78.25,70.76,76.0,77.33,76.35,80.0,81.08,78.41,80.21,82.27,81.48,78.24…	49.17	KREKEELEEIRQRLLAEGHPDPDAELQRMEQEAERRRQPQIKQEPESEEE	EEEKQEKEEKREEPMEEEEEPEQKPCLKPTLRPISSAPSVSSASGNATPN	HHHHHHHHHHHHHHHHHT S HHHHHHHHHHHHHHHHS HHH	HHHHHHHHHTT
P49760	P49760_p_1_1	6	119	124	R	P49760_2	43	101	143	0.311	0.311	RRRRRR		37.52,42.77,37.39,38.76,39.98,33.06	38.14	YQRENSSYRSQRSSRRKHRRRRRRSRTFSRSSSQHSSRRAKSV		34.72,31.71,33.2,34.67,30.92,35.94,32.44,36.27,32.6,40.18,38.49,32.42,39.41,36.52,40.93,39.36,36.61,41.37,37.52,42.77,37.39,38.76,39.98,33.06,42.94,40.4,34.69,42.0,38.47,33.89,40.89,34.19,43.11,38.35,40.58,37.18,36.78,40.86,39.74,53.51,61.62,72.95,87.24	38.47	RYCGSYRRNDYSRDRGDAYYDTDYRHSYEYQRENSSYRSQRSSRRKHRRR	RRRSRTFSRSSSQHSSRRAKSVEDDAEGHLIYHVGDWLQERYEIVSTLGE	HHHTTTSTTS TT	B TTS B TT EETTTEEEEEEEEE
P49790	P49790_p_1_1	6	9	14	G	P49790_1	37	1	37	0.619	0.619	GGGGGG		43.88,45.32,43.16,41.18,39.99,38.37	42.17	MASGAGGVGGGGGGKIRTRRCHQGPIKPYQQGRQQHQ	S	43.28,43.92,34.38,40.25,44.13,39.51,41.41,46.73,43.88,45.32,43.16,41.18,39.99,38.37,37.79,44.94,42.55,42.75,34.11,37.24,36.3,35.87,39.61,45.31,46.5,46.83,45.43,38.97,40.78,45.9,42.29,37.47,37.45,47.0,48.83,44.12,53.56	42.55	|||||||||||||||||||||||||||||||||||||||MASGAGGVGGG	GGGKIRTRRCHQGPIKPYQQGRQQHQGILSRVTESVKNIVPGWLQRYFNK	|||||||||||||||||||||||||||||||||||||||	S HHHHHHHHHHHHS HHHHHHHGG
P49840	P49840_p_1_1	10	26	35	G	P49840_1	96	1	96	0.8	0.8	GGGGGGGGGG		29.02,31.49,35.12,28.8,35.0,30.75,37.33,35.02,34.55,33.13	33.84	MSGGGPSGGGPGGSGRARTSSFAEPGGGGGGGGGGPGGSASGPGGTGGGKASVGAMGGGVGASSSGGGPGGSGGGGSGGPGAGTSFPPPGVKLGRD		36.11,36.24,34.91,35.03,35.04,45.71,34.97,32.15,33.31,33.3,41.68,29.81,33.44,32.48,33.15,32.87,31.27,29.19,31.57,27.06,30.18,30.4,28.12,30.46,33.05,29.02,31.49,35.12,28.8,35.0,30.75,37.33,35.02,34.55,33.13,43.61,32.04,34.23,32.56,36.32,36.17,33.37,37.13,33.92,32.86,32.52,33.68,29.86,34.29,30.98,33.44,30.02,35.86,31.17,27.71,32.53,26.4,30.08,30.45,29.77,32.29,28.55,36.56,36.6,30.84,34.42,33.51,32.…	32.93	||||||||||||||||||||MSGGGPSGGGPGGSGRARTSSFAEPGGGGG	GGGGGPGGSASGPGGTGGGKASVGAMGGGVGASSSGGGPGGSGGGGSGGP	||||||||||||||||||||
P49902	P49902_p_1_1	8	554	561	E	P49902_1	24	538	561	0.39	0.39	EEEEEEEE		48.18,45.67,41.54,39.24,38.29,39.53,37.05,36.52	39.385	PLAPQEITHCHDEDDDEEEEEEEE	SS TT	77.98,78.72,79.65,79.63,81.13,82.32,75.78,76.85,71.57,64.7,62.48,60.77,57.05,50.53,51.59,52.09,48.18,45.67,41.54,39.24,38.29,39.53,37.05,36.52	58.91	NRTSVDFKDTDYKRHQLTRSISEIKPPNLFPLAPQEITHCHDEDDDEEEE	EEEE||||||||||||||||||||||||||||||||||||||||||||||	GGGHHHHHTT S SS S SS SS TT	||||||||||||||||||||||||||||||||||||||||||||||
P50219	P50219_p_1_1	8	42	49	G	P50219_1	42	37	78	0.784	0.784	GGGGGGGG		43.46,43.98,44.83,45.32,46.18,46.84,44.57,42.8	44.7	AASGTGGGGGGGGASGGTSGSCSPASSEPPAAPADRLRAESP		43.89,48.09,48.15,43.42,48.34,43.46,43.98,44.83,45.32,46.18,46.84,44.57,42.8,50.01,54.44,45.77,45.28,48.54,49.42,46.07,48.94,43.91,52.9,53.19,46.09,43.36,51.46,51.26,59.13,50.21,51.23,44.41,51.38,45.46,44.76,46.16,51.01,41.4,48.43,48.14,41.92,60.57	46.51	|||||MEKSKNFRIDALLAVDPPRAASAQSAPLALVTSLAAAASGTGGGG	GGGGASGGTSGSCSPASSEPPAAPADRLRAESPSPPRLLAAHCALLPKPG	||||| TTSSTTSTTSS
P50219	P50219_p_2_1	6	100	105	G	P50219_2	20	101	120	0.624	0.624	GGGGGG		42.83,41.61,40.17,41.66,38.92,42.16	41.635	GGGGGTGGGHGGPHHHAHPG		41.61,40.17,41.66,38.92,42.16,42.17,43.13,41.5,44.57,50.31,46.4,43.28,53.33,52.81,52.66,47.48,43.28,49.89,49.32,43.47	43.375	GTSGSCSPASSEPPAAPADRLRAESPSPPRLLAAHCALLPKPGFLGAGGG	GGGTGGGHGGPHHHAHPGAAAAAAAAAAAAAAGGLALGLHPGGAQGGAGL
P50222	P50222_p_1_1	13	68	80	H	P50222_1	130	63	192	0.557	0.557	HHHHHHHHHHHHH	SSSS	52.03,51.4,57.93,57.22,55.66,59.09,58.59,59.63,60.81,58.99,59.18,57.59,55.11	57.93	QHHRGHHHHHHHHHHHHHQQQQHQALQTNWHLPQMSSPPSAARHSLCLQPDSGGPPELGSSPPVLCSNSSSLGSSTPTGAACAPGDYGRQALSPAEAEKRSGGKRKSDSSDSQEGNYKSEVNSKPRKERT	SSSSSSSSSGGG S	46.42,52.09,50.22,48.11,48.32,52.03,51.4,57.93,57.22,55.66,59.09,58.59,59.63,60.81,58.99,59.18,57.59,55.11,54.47,53.83,52.59,53.13,50.33,46.22,49.74,46.22,42.67,49.07,43.39,42.52,51.58,52.99,57.04,49.15,56.86,54.93,56.8,70.75,57.31,42.36,49.75,47.87,43.72,49.71,42.4,49.63,45.35,46.38,53.72,52.79,43.35,48.1,48.16,43.28,62.95,57.13,50.84,56.08,45.34,56.76,52.77,53.06,59.0,44.89,54.73,40.01,43.0,44.…	52.78	QSSLALHGRSDHMSYPELSTSSSSCIIAGYPNEEGMFASQHHRGHHHHHH	HHHHHHHQQQQHQALQTNWHLPQMSSPPSAARHSLCLQPDSGGPPELGSS		SSSSSSSSSGGG
P50548	P50548_p_1_1	6	166	171	S	P50548_1	40	130	169	0.718	0.718	SSSSSS		38.68,40.47,40.88,35.14,33.96,35.94	37.31	QSAPPVPSGGSHFRFPPSTPSEVLSPTEDPRSPPACSSSS		41.29,38.79,43.87,46.65,47.47,50.53,48.65,42.13,40.38,36.91,43.13,43.79,42.81,47.3,39.44,46.49,43.13,36.36,45.97,41.66,36.64,34.71,39.6,41.71,38.12,46.02,35.99,43.6,39.36,47.47,36.3,38.88,56.5,47.88,36.49,32.2,38.68,40.47,40.88,35.14	41.475	IDVGLAGGAVPQSAPPVPSGGSHFRFPPSTPSEVLSPTEDPRSPPACSSS	SSSLFSAVVARRLGRGSVSDCSDGTSELEEPLGEDPRARPPGPPDLGAFR	SS
P50548	P50548_p_2_1	9	365	373	S	P50548_4	137	342	478	0.707	0.707	SSSSSSSSS		45.4,45.02,46.21,46.2,45.82,45.31,42.77,47.27,47.26	45.82	PQRPDKCPLPPMAPETPPVPSSASSSSSSSSSPFKFKLQPPPLGRRQRAAGEKAVAGADKSGGSAGGLAEGAGALAPPPPPPQIKVEPISEGESEEVEVTDISDEDEEDGEVFKTPRAPPAPPKPEPGEAPGASQCM	S S	47.31,38.68,35.07,42.49,39.43,41.36,32.32,39.33,45.6,54.95,48.66,48.46,53.71,42.56,46.86,52.44,55.85,47.83,58.57,46.73,45.32,44.96,43.54,45.4,45.02,46.21,46.2,45.82,45.31,42.77,47.27,47.26,48.5,39.32,51.55,48.22,51.71,49.25,55.28,63.14,60.33,63.31,50.13,49.68,49.5,44.34,41.47,38.93,42.42,41.1,46.57,48.3,48.27,39.95,44.74,43.85,42.06,47.8,45.11,48.6,46.72,42.83,40.4,45.24,45.19,38.76,38.55,41.1,43…	46.73	QSVYNYHLSPRAFLHYPGLVVPQPQRPDKCPLPPMAPETPPVPSSASSSS	SSSSSPFKFKLQPPPLGRRQRAAGEKAVAGADKSGGSAGGLAEGAGALAP	HHHHH STTTTS TT S
P50548	P50548_p_3_1	6	418	423	P	P50548_4	137	342	478	0.707	0.707	PPPPPP		66.24,68.59,64.88,69.02,70.39,56.81	67.415	PQRPDKCPLPPMAPETPPVPSSASSSSSSSSSPFKFKLQPPPLGRRQRAAGEKAVAGADKSGGSAGGLAEGAGALAPPPPPPQIKVEPISEGESEEVEVTDISDEDEEDGEVFKTPRAPPAPPKPEPGEAPGASQCM	S S	47.31,38.68,35.07,42.49,39.43,41.36,32.32,39.33,45.6,54.95,48.66,48.46,53.71,42.56,46.86,52.44,55.85,47.83,58.57,46.73,45.32,44.96,43.54,45.4,45.02,46.21,46.2,45.82,45.31,42.77,47.27,47.26,48.5,39.32,51.55,48.22,51.71,49.25,55.28,63.14,60.33,63.31,50.13,49.68,49.5,44.34,41.47,38.93,42.42,41.1,46.57,48.3,48.27,39.95,44.74,43.85,42.06,47.8,45.11,48.6,46.72,42.83,40.4,45.24,45.19,38.76,38.55,41.1,43…	46.73	SSSPFKFKLQPPPLGRRQRAAGEKAVAGADKSGGSAGGLAEGAGALAPPP	PPPQIKVEPISEGESEEVEVTDISDEDEEDGEVFKTPRAPPAPPKPEPGE		S
P50553	P50553_p_1_1	13	35	47	A	P50553_2	57	42	98	0.555	0.555	AAAAAAAAAAAAA	SSSHHHHHHHHH	49.2,47.36,46.79,46.41,47.35,47.59,49.47,50.38,52.38,52.42,52.93,55.99,57.48	49.47	AAAAAAQSAQQQQQQQQQQQQAPQLRPAADGQPSGGGHKSAPKQVKRQRSSSPELMR	HHHHHHHHHHHHHHHHHHTT TTTT	50.38,52.38,52.42,52.93,55.99,57.48,60.22,58.68,61.92,65.31,66.2,65.27,69.87,69.94,66.81,66.67,64.48,62.15,61.84,61.81,56.12,51.71,56.7,48.74,52.71,54.4,54.53,52.71,52.29,51.19,47.15,52.75,51.99,52.25,47.06,43.06,44.88,55.3,51.72,54.7,59.87,50.26,51.38,51.56,54.82,52.35,53.16,55.11,54.19,58.51,52.12,50.0,60.18,50.9,54.63,55.83,57.73	54.53	||||||||||MESSAKMESGGAGQQPQPQPQQPFLPPAACFFATAAAAAA	AAAAAAAQSAQQQQQQQQQQQQAPQLRPAADGQPSGGGHKSAPKQVKRQR	|||||||||| SSS SSSHH	HHHHHHHHHHHHHHHHHHHTT
P50553	P50553_p_2_1	12	51	62	Q	P50553_2	57	42	98	0.555	0.555	QQQQQQQQQQQQ	HHHHHHHHHTT	65.31,66.2,65.27,69.87,69.94,66.81,66.67,64.48,62.15,61.84,61.81,56.12	65.29	AAAAAAQSAQQQQQQQQQQQQAPQLRPAADGQPSGGGHKSAPKQVKRQRSSSPELMR	HHHHHHHHHHHHHHHHHHTT TTTT	50.38,52.38,52.42,52.93,55.99,57.48,60.22,58.68,61.92,65.31,66.2,65.27,69.87,69.94,66.81,66.67,64.48,62.15,61.84,61.81,56.12,51.71,56.7,48.74,52.71,54.4,54.53,52.71,52.29,51.19,47.15,52.75,51.99,52.25,47.06,43.06,44.88,55.3,51.72,54.7,59.87,50.26,51.38,51.56,54.82,52.35,53.16,55.11,54.19,58.51,52.12,50.0,60.18,50.9,54.63,55.83,57.73	54.53	MESGGAGQQPQPQPQQPFLPPAACFFATAAAAAAAAAAAAAQSAQQQQQQ	QQQQQQAPQLRPAADGQPSGGGHKSAPKQVKRQRSSSPELMRCKRRLNFS	SSS SSSHHHHHHHHHHHHHHHHHH	HHHTT TTTT GG
P50579	P50579_p_1_1	9	98	106	K	P50579_1	123	1	123	0.537	0.537	KKKKKKKKK		44.39,46.67,49.11,45.19,46.44,45.45,44.61,44.81,48.77	45.45	MAGVEEVAASGSHLNGDLDPDDREEGAASTAEEAAKKKRRKKKKSKGPSAAGEQEPDKESGASVDEVARQLERSALEDKERDEDDEDGDGDGDGATGKKKKKKKKKRGPKVQTDPPSVPICDL	SS HHHHHHHHHHHHHHTTSSSS SS S HHHH	37.33,39.94,32.45,41.55,33.28,35.41,35.19,29.86,32.79,29.92,30.8,32.7,32.21,36.16,38.57,30.57,33.2,35.39,35.02,33.82,37.11,35.6,39.02,38.36,32.76,35.11,35.82,34.47,38.36,37.32,38.03,38.6,37.87,37.86,40.11,39.8,40.57,39.95,37.79,40.4,40.7,32.98,43.42,34.98,42.28,39.17,35.33,43.86,35.51,40.09,33.97,36.55,33.14,36.44,38.38,32.78,34.87,31.45,33.17,36.13,30.82,39.21,44.61,49.75,49.14,54.24,57.53,58.04…	40.41	GEQEPDKESGASVDEVARQLERSALEDKERDEDDEDGDGDGDGATGKKKK	KKKKKRGPKVQTDPPSVPICDLYPNGVFPKGQECEYPPTQDGRTAAWRTT	HHHHHHHHHHHHHHTTSSSS	SS S HHHH TTS EEE TT SHHHHH
P50616	P50616_p_1_1	8	249	256	P	P50616_2	37	231	267	0.498	0.498	PPPPPPPP		73.16,75.15,75.89,75.92,75.45,76.25,73.8,64.89	75.3	GLGLGSQQQPQQQQQPAQPPPPPPPPQQQQQQKTSAL		38.72,42.52,40.76,41.84,42.22,37.86,43.73,43.81,44.57,47.86,40.08,48.75,49.99,45.49,55.2,58.91,58.41,66.69,73.16,75.15,75.89,75.92,75.45,76.25,73.8,64.89,61.06,50.52,52.32,51.37,43.91,49.21,41.02,47.44,41.85,46.22,46.62	48.75	RTSPINLGLNVNDLLKQKAISSSMHSLYGLGLGSQQQPQQQQQPAQPPPP	PPPPQQQQQQKTSALSPNAKEFIFPNMQGQGSSTNGMFPGDSPLNLSPLQ	SS SS
P50616	P50616_p_2_1	6	257	262	Q	P50616_2	37	231	267	0.498	0.498	QQQQQQ		61.06,50.52,52.32,51.37,43.91,49.21	50.945	GLGLGSQQQPQQQQQPAQPPPPPPPPQQQQQQKTSAL		38.72,42.52,40.76,41.84,42.22,37.86,43.73,43.81,44.57,47.86,40.08,48.75,49.99,45.49,55.2,58.91,58.41,66.69,73.16,75.15,75.89,75.92,75.45,76.25,73.8,64.89,61.06,50.52,52.32,51.37,43.91,49.21,41.02,47.44,41.85,46.22,46.62	48.75	GLNVNDLLKQKAISSSMHSLYGLGLGSQQQPQQQQQPAQPPPPPPPPQQQ	QQQKTSALSPNAKEFIFPNMQGQGSSTNGMFPGDSPLNLSPLQYSNAFDV	SS
[truncated: 1,388 more rows]
