# Supplementary material for: One Step Closer to the Understanding of the Relationship IDR-LCR-Structure
Source: Genes (Basel). 2023 Aug 28;14(9):1711. doi: 10.3390/genes14091711 (PMC10531472; doi:10.3390/genes14091711)
Supplement: Supplementary file 1 [file genes-14-01711-s001.zip › SupplTable_S3.xlsx]

## Sheet: SupplTable_S3
poly type	count	perc.	max size	median size	mean size	% helix	% extended	% coil	% unfolded
polyX	1913	100	42	7	7.858							Top polyXs and polyXYs covered by helices
P	461	24.1	27	7	7.623	0.03	0	0.64	99.33
E	452	23.6	32	7	8.192	28.49	0	7.41	64.09
S	283	14.8	42	7	8.272	0.94	0.35	1.33	97.38
G	244	12.8	21	7	7.824	0.12	0.07	0.98	98.83
Q	131	6.8	38	8	11.206	47.79	0	10.72	41.48
A	100	5.2	20	7	7.41	22.28	0	5.02	72.7
K	96	5	10	7	7.01	15.71	0.35	1.5	82.44
H	61	3.2	15	8	8.377	2.25	0	3.4	94.35
D	43	2.2	16	7	7.605	2.23	0	5.5	92.27
R	27	1.4	11	6	6.481	29.63	0.53	1.23	68.61
T	13	0.7	11	6	7.154	1.1	0	0	98.9
M	1	0.1	7	7	7	85.71	0	0	14.29
N	1	0.1	8	8	8	0	0	25	75
polyXY	9009	100	63	6	7.53
GP	668	7.415	36	7	7.671	0.15	0.14	2.56	97.15
AP	660	7.326	22	7	7.483	0.4	0.04	0.94	98.62
DE	636	7.06	49	7	8.829	9.18	0.03	7.98	82.81
GS	542	6.016	31	7	8.28	0.42	0.44	1.97	97.17
PS	512	5.683	63	6	7.07	0.29	0	1.03	98.67
RS	383	4.251	25	7	7.658	3.09	0.17	2.98	93.76
AG	349	3.874	25	7	7.86	3.32	0.11	3.85	92.72
PQ	322	3.574	44	8	9.422	1.05	0.16	1.88	96.92
ES	310	3.441	31	7	7.516	4.62	0	4.22	91.16
GR	297	3.297	24	7	7.923	2.23	0	3.81	93.96
EK	282	3.13	18	7	7.557	36.78	0	6.23	56.99
DS	270	2.997	52	7	8.333	1.27	0.22	2.32	96.19
AS	250	2.775	29	7	7.576	4.52	0	2.49	92.99
LP	236	2.62	26	7	8.254	0.36	0.07	1.46	98.11
ST	233	2.586	45	6	7.116	0.24	10.92	6.28	82.56
PR	204	2.264	15	6	6.809	0.31	0	1.46	98.22
EP	195	2.165	19	6	7.046	1.51	0	1.77	96.72
EG	192	2.131	38	7	7.99	5.12	0	6.38	88.5
ER	191	2.12	36	7	7.686	76.29	0	4.13	19.58
AE	170	1.887	26	6	7.118	27.63	0	9	63.37
KR	161	1.787	10	6	6.708	20.08	0.41	5.37	74.13
KS	114	1.265	12	6	6.842	9.67	0.73	2.51	87.09
PT	102	1.132	19	6.5	6.931	0	0	1.41	98.59
GK	92	1.021	11	6.5	6.826	4.3	0.72	4.3	90.68
AK	82	0.91	14	6	6.695	46.76	0.2	3.27	49.77
KP	82	0.91	10	6	6.671	0.41	0.2	0.68	98.72
AT	80	0.888	16	7	7.487	5.34	0	2.05	92.61
EQ	78	0.866	26	6	7.603	65	0	7.56	27.44
LS	68	0.755	10	7	6.882	4.13	0	3.29	92.58
AR	55	0.611	10	6	6.945	30.26	0	7.05	62.68
QR	55	0.611	32	6	8.018	59.4	0	8.97	31.63
DK	49	0.544	11	7	7.184	23.12	0	5.61	71.28
QS	49	0.544	14	6	6.694	12.01	0	2.71	85.28
HS	48	0.533	15	6	7.062	0	0	0.6	99.4
NS	48	0.533	12	6	7.083	3.3	0	2.58	94.12
DR	43	0.477	14	7	7.651	47.73	0	6.15	46.12
KQ	43	0.477	15	6	7.023	67.09	0	5.44	27.46
PV	43	0.477	12	6	7.023	0	0	0.29	99.71
HP	42	0.466	19	8	9.19	0	0	1.45	98.55
EL	41	0.455	18	6	7.122	43.87	0	11.16	44.97
AQ	39	0.433	25	6	7.615	41.35	0	7.61	51.04
DG	33	0.366	12	6	6.758	0	0	3.54	96.46
SV	31	0.344	10	6	6.645	0	0	0	100
HQ	29	0.322	36	8	10.931	17.48	0	5.19	77.32
EV	28	0.311	30	7	8.036	14.76	0	1.31	83.93
HR	28	0.311	22	7	7.393	12.72	0	7.5	79.78
GQ	27	0.3	27	6	7.444	8.02	0	7.28	84.69
LQ	26	0.289	29	7	10.615	46.78	0	9.47	43.75
ET	25	0.278	10	6	6.56	1.14	2.67	2.71	93.48
GL	25	0.278	10	6	6.64	3.14	0	10.95	85.9
KT	25	0.278	10	7	6.76	0	0	0	100
HK	24	0.266	18	8	9.5	7.08	0	3.33	89.58
DP	21	0.233	10	6	6.714	3.17	0	6.51	90.32
GT	20	0.222	12	6	7	0	0	2.5	97.5
KN	19	0.211	11	6	7.158	7.89	0	4.01	88.1
RT	15	0.167	15	6	7.2	7.78	7.78	11.11	73.33
EN	13	0.144	7	6	6.308	7.69	0	4.4	87.91
GH	13	0.144	10	7	7.538	0	0	0	100
AD	12	0.133	9	6	6.75	13.1	0	3.12	83.78
DL	12	0.133	7	6	6.083	6.94	0	5.56	87.5
GV	10	0.111	10	6.5	6.9	0	0	1.25	98.75
GN	9	0.1	12	7	7.778	0	0	0	100
QT	9	0.1	9	6	6.667	9.88	0	7.41	82.72
AV	8	0.089	10	7	7.25	0	0	0	100
FS	8	0.089	7	6	6.25	7.14	1.79	3.57	87.5
NP	8	0.089	7	6	6.125	0	0	8.33	91.67
AH	7	0.078	21	7	9.714	0	0	0	100
AL	7	0.078	8	7	6.857	4.76	0	7.14	88.1
DN	7	0.078	8	6	6.429	0	0	0	100
DT	7	0.078	6	6	6	14.29	0	2.38	83.33
KL	7	0.078	7	6	6.286	31.97	0	6.12	61.9
MQ	7	0.078	32	8	11.143	27.68	0	8.04	64.29
SY	7	0.078	9	6	6.571	0	0	0	100
DH	6	0.067	8	6	6.5	11.11	0	7.64	81.25
EM	6	0.067	8	6	6.5	59.52	0	15.48	25
HN	6	0.067	11	7	7.667	0	0	0	100
LR	6	0.067	8	6	6.5	33.33	0	0	66.67
MP	6	0.067	9	7	7.167	0	0	0	100
RV	6	0.067	6	6	6	0	0	0	100
TV	6	0.067	7	6	6.333	0	16.67	0	83.33
CG	5	0.056	17	8	10	0	0	7.5	92.5
CP	5	0.056	13	6	8	0	0	0	100
CS	5	0.056	11	6	7.2	0	0	6.67	93.33
FP	5	0.056	7	6	6.4	0	0	2.86	97.14
GY	5	0.056	17	8	9.8	0	0	1.18	98.82
KM	5	0.056	10	6	7	38	0	0	62
KV	5	0.056	8	7	7	0	0	2.5	97.5
NT	5	0.056	9	7	7.2	16.67	0	3.33	80
DQ	4	0.044	9	6.5	7	0	0	50	50
EI	4	0.044	8	6.5	6.75	0	0	0	100
EY	4	0.044	6	6	6	50	0	0	50
FG	4	0.044	21	7	10.25	0	0	0	100
IP	4	0.044	6	6	6	0	0	4.17	95.83
NQ	4	0.044	8	6	6.5	0	0	25	75
PY	4	0.044	10	8.5	8.5	0	0	2.78	97.22
AN	3	0.033	8	7	7	29.17	0	4.17	66.67
HL	3	0.033	9	6	7	33.33	0	0	66.67
IK	3	0.033	8	6	6.667	33.33	0	5.56	61.11
IS	3	0.033	6	6	6	0	0	0	100
QV	3	0.033	9	7	7.333	0	0	0	100
QY	3	0.033	7	7	6.667	33.33	0	0	66.67
DF	2	0.022	6	6	6	0	0	16.67	83.33
DM	2	0.022	7	6.5	6.5	0	0	28.57	71.43
DW	2	0.022	10	9	9	15	0	15	70
EF	2	0.022	19	12.5	12.5	50	0	0	50
EH	2	0.022	12	10.5	10.5	0	0	0	100
FT	2	0.022	6	6	6	0	0	0	100
GW	2	0.022	27	17.5	17.5	0	0	0	100
HY	2	0.022	12	9	9	0	0	4.17	95.83
MS	2	0.022	7	6.5	6.5	0	0	0	100
NR	2	0.022	7	6.5	6.5	42.86	0	0	57.14
SW	2	0.022	6	6	6	0	0	16.67	83.33
AI	1	0.011	6	6	6	100	0	0	0
DI	1	0.011	7	7	7	0	0	0	100
DV	1	0.011	6	6	6	0	0	0	100
DY	1	0.011	6	6	6	0	0	16.67	83.33
GI	1	0.011	7	7	7	0	0	0	100
GM	1	0.011	7	7	7	0	0	0	100
HT	1	0.011	6	6	6	100	0	0	0
HV	1	0.011	8	8	8	0	0	0	100
IN	1	0.011	6	6	6	0	0	0	100
IT	1	0.011	6	6	6	0	100	0	0
LN	1	0.011	6	6	6	66.67	0	33.33	0
MR	1	0.011	6	6	6	0	0	0	100
MT	1	0.011	6	6	6	0	0	0	100
NV	1	0.011	6	6	6	0	0	0	100
PW	1	0.011	6	6	6	0	0	0	100
RY	1	0.011	7	7	7	0	0	14.29	85.71
