# Supplementary material for: One Step Closer to the Understanding of the Relationship IDR-LCR-Structure
Source: Genes (Basel). 2023 Aug 28;14(9):1711. doi: 10.3390/genes14091711 (PMC10531472; doi:10.3390/genes14091711)
Supplement: Supplementary file 1 [file genes-14-01711-s001.zip › SupplTable_S4.xlsx]

## Sheet: SupplTable_S4
	Total		N-Terminus		Non Terminus		C-Terminus
Res	Count	% helix	count / %	% helix	count / %	% helix	count / %	% helix			The top 3 most frequent polyXYs per sequence region were highlighted in yellow.
	9009		1903 (21.12%)		5615 (62.33%)		1491 (16.55%)				The top 10 polyXY with the highest helical coverage were highlighted in green.
GP	668	0.15%	128 (19.16%)	0.70%	479 (71.71%)	0.02%	61 ( 9.13%)	0.00%
AP	660	0.40%	186 (28.18%)	0.89%	379 (57.42%)	0.18%	95 (14.39%)	0.35%
DE	636	9.18%	97 (15.25%)	10.36%	393 (61.79%)	8.07%	146 (22.96%)	11.38%
GS	542	0.42%	146 (26.94%)	0.10%	285 (52.58%)	0.52%	111 (20.48%)	0.60%
PS	512	0.29%	91 (17.77%)	0.18%	344 (67.19%)	0.39%	77 (15.04%)	0.00%
RS	383	3.09%	73 (19.06%)	2.74%	234 (61.10%)	3.96%	76 (19.84%)	0.75%
AG	349	3.32%	159 (45.56%)	3.94%	149 (42.69%)	2.52%	41 (11.75%)	3.86%
PQ	322	1.05%	82 (25.47%)	0.54%	200 (62.11%)	1.16%	40 (12.42%)	1.54%
ES	310	4.62%	40 (12.90%)	1.25%	220 (70.97%)	4.46%	50 (16.13%)	8.06%
GR	297	2.23%	88 (29.63%)	2.31%	144 (48.48%)	2.50%	65 (21.89%)	1.54%
EK	282	36.78%	34 (12.06%)	33.82%	202 (71.63%)	34.90%	46 (16.31%)	47.17%
DS	270	1.27%	26 ( 9.63%)	1.28%	198 (73.33%)	1.05%	46 (17.04%)	2.17%
AS	250	4.52%	79 (31.60%)	2.31%	141 (56.40%)	4.29%	30 (12.00%)	11.43%
LP	236	0.36%	41 (17.37%)	0.00%	159 (67.37%)	0.33%	36 (15.25%)	0.93%
ST	233	0.24%	30 (12.88%)	0.89%	175 (75.11%)	0.16%	28 (12.02%)	0.00%
PR	204	0.31%	58 (28.43%)	0.00%	112 (54.90%)	0.57%	34 (16.67%)	0.00%
EP	195	1.51%	48 (24.62%)	3.26%	118 (60.51%)	1.17%	29 (14.87%)	0.00%
EG	192	5.12%	32 (16.67%)	1.91%	127 (66.15%)	4.89%	33 (17.19%)	9.13%
ER	191	76.29%	29 (15.18%)	55.71%	136 (71.20%)	79.33%	26 (13.61%)	83.33%
AE	170	27.63%	49 (28.82%)	32.94%	86 (50.59%)	22.83%	35 (20.59%)	32.00%
KR	161	20.08%	22 (13.66%)	28.03%	108 (67.08%)	19.04%	31 (19.25%)	18.05%
KS	114	9.67%	6 ( 5.26%)	0.00%	76 (66.67%)	8.36%	32 (28.07%)	14.58%
PT	102	0.00%	9 ( 8.82%)	0.00%	76 (74.51%)	0.00%	17 (16.67%)	0.00%
GK	92	4.30%	28 (30.43%)	11.90%	47 (51.09%)	0.00%	17 (18.48%)	3.68%
AK	82	46.76%	33 (40.24%)	77.49%	28 (34.15%)	30.80%	21 (25.61%)	19.73%
KP	82	0.41%	13 (15.85%)	0.00%	49 (59.76%)	0.68%	20 (24.39%)	0.00%
AT	80	5.34%	21 (26.25%)	5.27%	44 (55.00%)	4.92%	15 (18.75%)	6.67%
EQ	78	65.00%	8 (10.26%)	50.00%	60 (76.92%)	62.84%	10 (12.82%)	90.00%
LS	68	4.13%	8 (11.76%)	8.33%	53 (77.94%)	4.04%	7 (10.29%)	0.00%
AR	55	30.26%	22 (40.00%)	28.31%	26 (47.27%)	36.22%	7 (12.73%)	14.29%
QR	55	59.40%	13 (23.64%)	42.02%	33 (60.00%)	64.99%	9 (16.36%)	64.02%
DK	49	23.12%	12 (24.49%)	34.72%	29 (59.18%)	10.90%	8 (16.33%)	50.00%
QS	49	12.01%	9 (18.37%)	20.37%	30 (61.22%)	10.18%	10 (20.41%)	10.00%
HS	48	0.00%	7 (14.58%)	0.00%	30 (62.50%)	0.00%	11 (22.92%)	0.00%
NS	48	3.30%	8 (16.67%)	1.04%	32 (66.67%)	3.35%	8 (16.67%)	5.36%
DR	43	47.73%	8 (18.60%)	25.00%	28 (65.12%)	48.30%	7 (16.28%)	71.43%
KQ	43	67.09%	5 (11.63%)	80.00%	20 (46.51%)	50.83%	18 (41.86%)	81.57%
PV	43	0.00%	9 (20.93%)	0.00%	28 (65.12%)	0.00%	6 (13.95%)	0.00%
HP	42	0.00%	6 (14.29%)	0.00%	27 (64.29%)	0.00%	9 (21.43%)	0.00%
EL	41	43.87%	3 ( 7.32%)	66.67%	32 (78.05%)	42.37%	6 (14.63%)	40.48%
AQ	39	41.35%	6 (15.38%)	28.57%	26 (66.67%)	42.61%	7 (17.95%)	47.62%
DG	33	0.00%	13 (39.39%)	0.00%	16 (48.48%)	0.00%	4 (12.12%)	0.00%
SV	31	0.00%	6 (19.35%)	0.00%	24 (77.42%)	0.00%	1 ( 3.23%)	0.00%
HQ	29	17.48%	6 (20.69%)	1.67%	19 (65.52%)	20.89%	4 (13.79%)	25.00%
EV	28	14.76%	6 (21.43%)	32.78%	15 (53.57%)	7.78%	7 (25.00%)	14.29%
HR	28	12.72%	5 (17.86%)	0.00%	17 (60.71%)	15.06%	6 (21.43%)	16.67%
GQ	27	8.02%	3 (11.11%)	0.00%	15 (55.56%)	13.33%	9 (33.33%)	1.85%
LQ	26	46.78%	7 (26.92%)	64.56%	15 (57.69%)	34.28%	4 (15.38%)	62.50%
ET	25	1.14%	3 (12.00%)	0.00%	15 (60.00%)	0.00%	7 (28.00%)	4.08%
GL	25	3.14%	7 (28.00%)	0.00%	13 (52.00%)	6.04%	5 (20.00%)	0.00%
KT	25	0.00%	10 (40.00%)	0.00%	13 (52.00%)	0.00%	2 ( 8.00%)	0.00%
HK	24	7.08%	6 (25.00%)	0.00%	11 (45.83%)	15.45%	7 (29.17%)	0.00%
DP	21	3.17%	7 (33.33%)	7.14%	13 (61.90%)	1.28%	1 ( 4.76%)	0.00%
GT	20	0.00%	7 (35.00%)	0.00%	12 (60.00%)	0.00%	1 ( 5.00%)	0.00%
KN	19	7.89%	4 (21.05%)	0.00%	13 (68.42%)	3.85%	2 (10.53%)	50.00%
RT	15	7.78%	0 (0.00%)	0.00%	14 (93.33%)	8.33%	1 ( 6.67%)	0.00%
EN	13	7.69%	3 (23.08%)	0.00%	8 (61.54%)	0.00%	2 (15.38%)	50.00%
GH	13	0.00%	1 ( 7.69%)	0.00%	9 (69.23%)	0.00%	3 (23.08%)	0.00%
AD	12	13.10%	3 (25.00%)	33.33%	5 (41.67%)	11.43%	4 (33.33%)	0.00%
DL	12	6.94%	3 (25.00%)	27.78%	4 (33.33%)	0.00%	5 (41.67%)	0.00%
GV	10	0.00%	4 (40.00%)	0.00%	2 (20.00%)	0.00%	4 (40.00%)	0.00%
GN	9	0.00%	6 (66.67%)	0.00%	2 (22.22%)	0.00%	1 (11.11%)	0.00%
QT	9	9.88%	2 (22.22%)	0.00%	4 (44.44%)	0.00%	3 (33.33%)	29.63%
AV	8	0.00%	3 (37.50%)	0.00%	3 (37.50%)	0.00%	2 (25.00%)	0.00%
FS	8	7.14%	1 (12.50%)	0.00%	3 (37.50%)	0.00%	4 (50.00%)	14.29%
NP	8	0.00%	1 (12.50%)	0.00%	5 (62.50%)	0.00%	2 (25.00%)	0.00%
AH	7	0.00%	0 (0.00%)	0.00%	6 (85.71%)	0.00%	1 (14.29%)	0.00%
AL	7	4.76%	6 (85.71%)	5.56%	1 (14.29%)	0.00%	0 (0.00%)	0.00%
DN	7	0.00%	0 (0.00%)	0.00%	4 (57.14%)	0.00%	3 (42.86%)	0.00%
DT	7	14.29%	0 (0.00%)	0.00%	2 (28.57%)	0.00%	5 (71.43%)	20.00%
KL	7	31.97%	2 (28.57%)	83.33%	3 (42.86%)	0.00%	2 (28.57%)	28.57%
MQ	7	27.68%	0 (0.00%)	0.00%	7 (100.00%)	27.68%	0 (0.00%)	0.00%
SY	7	0.00%	3 (42.86%)	0.00%	3 (42.86%)	0.00%	1 (14.29%)	0.00%
DH	6	11.11%	2 (33.33%)	0.00%	1 (16.67%)	0.00%	3 (50.00%)	22.22%
EM	6	59.52%	3 (50.00%)	52.38%	1 (16.67%)	0.00%	2 (33.33%)	100.00%
HN	6	0.00%	2 (33.33%)	0.00%	4 (66.67%)	0.00%	0 (0.00%)	0.00%
LR	6	33.33%	3 (50.00%)	0.00%	1 (16.67%)	100.00%	2 (33.33%)	50.00%
MP	6	0.00%	1 (16.67%)	0.00%	3 (50.00%)	0.00%	2 (33.33%)	0.00%
RV	6	0.00%	1 (16.67%)	0.00%	5 (83.33%)	0.00%	0 (0.00%)	0.00%
TV	6	0.00%	2 (33.33%)	0.00%	3 (50.00%)	0.00%	1 (16.67%)	0.00%
CG	5	0.00%	1 (20.00%)	0.00%	3 (60.00%)	0.00%	1 (20.00%)	0.00%
CP	5	0.00%	0 (0.00%)	0.00%	5 (100.00%)	0.00%	0 (0.00%)	0.00%
CS	5	0.00%	2 (40.00%)	0.00%	3 (60.00%)	0.00%	0 (0.00%)	0.00%
FP	5	0.00%	1 (20.00%)	0.00%	3 (60.00%)	0.00%	1 (20.00%)	0.00%
GY	5	0.00%	0 (0.00%)	0.00%	1 (20.00%)	0.00%	4 (80.00%)	0.00%
KM	5	38.00%	2 (40.00%)	45.00%	3 (60.00%)	33.33%	0 (0.00%)	0.00%
KV	5	0.00%	1 (20.00%)	0.00%	2 (40.00%)	0.00%	2 (40.00%)	0.00%
NT	5	16.67%	1 (20.00%)	0.00%	3 (60.00%)	0.00%	1 (20.00%)	83.33%
DQ	4	0.00%	1 (25.00%)	0.00%	2 (50.00%)	0.00%	1 (25.00%)	0.00%
EI	4	0.00%	0 (0.00%)	0.00%	3 (75.00%)	0.00%	1 (25.00%)	0.00%
EY	4	50.00%	3 (75.00%)	66.67%	1 (25.00%)	0.00%	0 (0.00%)	0.00%
FG	4	0.00%	2 (50.00%)	0.00%	2 (50.00%)	0.00%	0 (0.00%)	0.00%
IP	4	0.00%	0 (0.00%)	0.00%	2 (50.00%)	0.00%	2 (50.00%)	0.00%
NQ	4	0.00%	0 (0.00%)	0.00%	4 (100.00%)	0.00%	0 (0.00%)	0.00%
PY	4	0.00%	1 (25.00%)	0.00%	2 (50.00%)	0.00%	1 (25.00%)	0.00%
AN	3	29.17%	0 (0.00%)	0.00%	3 (100.00%)	29.17%	0 (0.00%)	0.00%
HL	3	33.33%	0 (0.00%)	0.00%	3 (100.00%)	33.33%	0 (0.00%)	0.00%
IK	3	33.33%	1 (33.33%)	0.00%	1 (33.33%)	0.00%	1 (33.33%)	100.00%
IS	3	0.00%	0 (0.00%)	0.00%	3 (100.00%)	0.00%	0 (0.00%)	0.00%
QV	3	0.00%	0 (0.00%)	0.00%	3 (100.00%)	0.00%	0 (0.00%)	0.00%
QY	3	33.33%	0 (0.00%)	0.00%	2 (66.67%)	0.00%	1 (33.33%)	100.00%
DF	2	0.00%	0 (0.00%)	0.00%	2 (100.00%)	0.00%	0 (0.00%)	0.00%
DM	2	0.00%	1 (50.00%)	0.00%	0 (0.00%)	0.00%	1 (50.00%)	0.00%
DW	2	15.00%	1 (50.00%)	0.00%	1 (50.00%)	30.00%	0 (0.00%)	0.00%
EF	2	50.00%	0 (0.00%)	0.00%	2 (100.00%)	50.00%	0 (0.00%)	0.00%
EH	2	0.00%	0 (0.00%)	0.00%	1 (50.00%)	0.00%	1 (50.00%)	0.00%
FT	2	0.00%	0 (0.00%)	0.00%	0 (0.00%)	0.00%	2 (100.00%)	0.00%
GW	2	0.00%	1 (50.00%)	0.00%	0 (0.00%)	0.00%	1 (50.00%)	0.00%
HY	2	0.00%	1 (50.00%)	0.00%	1 (50.00%)	0.00%	0 (0.00%)	0.00%
MS	2	0.00%	1 (50.00%)	0.00%	1 (50.00%)	0.00%	0 (0.00%)	0.00%
NR	2	42.86%	0 (0.00%)	0.00%	2 (100.00%)	42.86%	0 (0.00%)	0.00%
SW	2	0.00%	0 (0.00%)	0.00%	2 (100.00%)	0.00%	0 (0.00%)	0.00%
AI	1	100.00%	0 (0.00%)	0.00%	1 (100.00%)	100.00%	0 (0.00%)	0.00%
DI	1	0.00%	0 (0.00%)	0.00%	1 (100.00%)	0.00%	0 (0.00%)	0.00%
DV	1	0.00%	0 (0.00%)	0.00%	0 (0.00%)	0.00%	1 (100.00%)	0.00%
DY	1	0.00%	1 (100.00%)	0.00%	0 (0.00%)	0.00%	0 (0.00%)	0.00%
GI	1	0.00%	0 (0.00%)	0.00%	1 (100.00%)	0.00%	0 (0.00%)	0.00%
GM	1	0.00%	0 (0.00%)	0.00%	0 (0.00%)	0.00%	1 (100.00%)	0.00%
HT	1	100.00%	0 (0.00%)	0.00%	1 (100.00%)	100.00%	0 (0.00%)	0.00%
HV	1	0.00%	0 (0.00%)	0.00%	1 (100.00%)	0.00%	0 (0.00%)	0.00%
IN	1	0.00%	0 (0.00%)	0.00%	1 (100.00%)	0.00%	0 (0.00%)	0.00%
IT	1	0.00%	0 (0.00%)	0.00%	0 (0.00%)	0.00%	1 (100.00%)	0.00%
LN	1	66.67%	0 (0.00%)	0.00%	1 (100.00%)	66.67%	0 (0.00%)	0.00%
MR	1	0.00%	0 (0.00%)	0.00%	1 (100.00%)	0.00%	0 (0.00%)	0.00%
MT	1	0.00%	1 (100.00%)	0.00%	0 (0.00%)	0.00%	0 (0.00%)	0.00%
NV	1	0.00%	0 (0.00%)	0.00%	0 (0.00%)	0.00%	1 (100.00%)	0.00%
PW	1	0.00%	0 (0.00%)	0.00%	1 (100.00%)	0.00%	0 (0.00%)	0.00%
RY	1	0.00%	0 (0.00%)	0.00%	0 (0.00%)	0.00%	1 (100.00%)	0.00%
