# Supplementary material for: One Step Closer to the Understanding of the Relationship IDR-LCR-Structure
Source: Genes (Basel). 2023 Aug 28;14(9):1711. doi: 10.3390/genes14091711 (PMC10531472; doi:10.3390/genes14091711)
Supplement: Supplementary file 1 [file genes-14-01711-s001.zip › SupplTable_S5.xlsx]

## Sheet: BP
poly type	GO id	GO term	Overlap	p-value	adj p-value	odds ratio	combined score	enriched genes	count genes helix	fraction genes helix	enriched genes helix	common parent id	common parent term
ER	GO:0006397	mRNA processing (GO:0006397)	16/300	7.34535e-10	6.317e-07	8.41587	177.001	TCERG1*,IK*,SCAF11,YTHDC1*,DDX23*,UPF3B*,U2SURP*,CCAR1*,RBM15B,FIP1L1*,SNRNP70*,CWC22,DHX15*,SNRNP27,DHX38*,RBM5	11	0.69	TCERG1: O14776_p_6_1, U2SURP: O15042_p_4_1, DHX15: O43143_p_2_1, SNRNP70: P08621_p_3_1; P08621_p_4_1; P08621_p_8_1; P08621_p_9_1, IK: Q13123_p_4_1; Q13123_p_5_1; Q13123_p_6_1, FIP1L1: Q6UN15_p_4_1, CCAR1: Q8IX12_p_2_1, DHX38: Q92620_p_1_1; Q92620_p_2_1, YTHDC1: Q96MU7_p_2_1, DDX23: Q9BUQ8_p_4_1, UPF3B: Q9BZI7_p_2_1; Q9BZI7_p_3_1; Q9BZI7_p_4_1; Q9BZI7_p_5_1	GO:0006396	RNA processing
ER	GO:0000398	mRNA splicing, via spliceosome (GO:0000398)	15/274	1.80014e-09	7.74061e-07	8.59688	173.102	IK*,SCAF11,YTHDC1*,DDX23*,UPF3B*,U2SURP*,CCAR1*,RBM15B,FIP1L1*,SNRNP70*,CWC22,DHX15*,SNRNP27,DHX38*,RBM5	10	0.67	U2SURP: O15042_p_4_1, DHX15: O43143_p_2_1, SNRNP70: P08621_p_3_1; P08621_p_4_1; P08621_p_8_1; P08621_p_9_1, IK: Q13123_p_4_1; Q13123_p_5_1; Q13123_p_6_1, FIP1L1: Q6UN15_p_4_1, CCAR1: Q8IX12_p_2_1, DHX38: Q92620_p_1_1; Q92620_p_2_1, YTHDC1: Q96MU7_p_2_1, DDX23: Q9BUQ8_p_4_1, UPF3B: Q9BZI7_p_2_1; Q9BZI7_p_3_1; Q9BZI7_p_4_1; Q9BZI7_p_5_1	GO:0006396	RNA processing
ER	GO:0000377	RNA splicing, via transesterification reactions with bulged adenosine as nucleophile (GO:0000377)	14/251	5.06444e-09	1.45181e-06	8.71241	166.416	IK*,YTHDC1*,DDX23*,UPF3B*,U2SURP*,CCAR1*,RBM15B,FIP1L1*,SNRNP70*,CWC22,DHX15*,SNRNP27,DHX38*,RBM5	10	0.71	U2SURP: O15042_p_4_1, DHX15: O43143_p_2_1, SNRNP70: P08621_p_3_1; P08621_p_4_1; P08621_p_8_1; P08621_p_9_1, IK: Q13123_p_4_1; Q13123_p_5_1; Q13123_p_6_1, FIP1L1: Q6UN15_p_4_1, CCAR1: Q8IX12_p_2_1, DHX38: Q92620_p_1_1; Q92620_p_2_1, YTHDC1: Q96MU7_p_2_1, DDX23: Q9BUQ8_p_4_1, UPF3B: Q9BZI7_p_2_1; Q9BZI7_p_3_1; Q9BZI7_p_4_1; Q9BZI7_p_5_1	GO:0006396	RNA processing
ER	GO:0000245	spliceosomal complex assembly (GO:0000245)	7/46	4.22664e-08	9.08727e-06	25.4026	431.317	YTHDC1*,SCAF11,DDX23*,LUC7L*,LUC7L3*,RBM5,LUC7L2*	5	0.71	LUC7L3: O95232_p_1_1; O95232_p_2_1; O95232_p_3_1, YTHDC1: Q96MU7_p_2_1, DDX23: Q9BUQ8_p_4_1, LUC7L: Q9NQ29_p_1_1, LUC7L2: Q9Y383_p_1_1	GO:0006396	RNA processing
ER	GO:0006376	mRNA splice site selection (GO:0006376)	5/30	2.46182e-06	0.000423432	27.9268	360.663	SFSWAP,YTHDC1*,LUC7L*,LUC7L3*,LUC7L2*	4	0.8	LUC7L3: O95232_p_1_1; O95232_p_2_1; O95232_p_3_1, YTHDC1: Q96MU7_p_2_1, LUC7L: Q9NQ29_p_1_1, LUC7L2: Q9Y383_p_1_1	GO:0006396	RNA processing
ER	GO:0022618	ribonucleoprotein complex assembly (GO:0022618)	8/136	7.49169e-06	0.00107381	8.86915	104.671	SCAF11,YTHDC1*,DDX23*,LUC7L*,LUC7L3*,RBM5,LUC7L2*,EIF3A*	6	0.75	LUC7L3: O95232_p_1_1; O95232_p_2_1; O95232_p_3_1, EIF3A: Q14152_p_4_1; Q14152_p_5_1, YTHDC1: Q96MU7_p_2_1, DDX23: Q9BUQ8_p_4_1, LUC7L: Q9NQ29_p_1_1, LUC7L2: Q9Y383_p_1_1	GO:0022618	ribonucleoprotein complex assembly
ER	GO:0048024	regulation of mRNA splicing, via spliceosome (GO:0048024)	6/90	5.33326e-05	0.00585641	10.0147	98.5342	RBM25*,RBM15B,SFSWAP,YTHDC1*,CWC22,RBM5	2	0.33	RBM25: P49756_p_3_1; P49756_p_4_1; P49756_p_8_1, YTHDC1: Q96MU7_p_2_1	GO:0050684	regulation of mRNA processing
ER	GO:0006396	RNA processing (GO:0006396)	8/179	5.44782e-05	0.00585641	6.62443	65.0367	TCERG1*,SCAF11,DDX23*,DHX15*,LUC7L3*,DROSHA,PPIG*,RBM5	5	0.62	TCERG1: O14776_p_6_1, DHX15: O43143_p_2_1, LUC7L3: O95232_p_1_1; O95232_p_2_1; O95232_p_3_1, PPIG: Q13427_p_5_1, DDX23: Q9BUQ8_p_4_1	GO:0006396	RNA processing
ER	GO:0008380	RNA splicing (GO:0008380)	6/98	8.59308e-05	0.00821116	9.14015	85.5698	TCERG1*,SCAF11,DDX23*,DHX15*,LUC7L3*,PPIG*	5	0.83	TCERG1: O14776_p_6_1, DHX15: O43143_p_2_1, LUC7L3: O95232_p_1_1; O95232_p_2_1; O95232_p_3_1, PPIG: Q13427_p_5_1, DDX23: Q9BUQ8_p_4_1	GO:0006396	RNA processing
ER	GO:0032528	microvillus organization (GO:0032528)	3/14	0.000133435	0.010744	37.5795	335.281	MINK1*,TNIK*,MAP4K4*	3	1	MAP4K4: O95819_p_1_1, MINK1: Q8N4C8_p_1_1, TNIK: Q9UKE5_p_1_1	GO:0032528	microvillus organization
ER	GO:0050684	regulation of mRNA processing (GO:0050684)	4/36	0.000137423	0.010744	17.326	154.071	YTHDC1*,CWC22,SAFB2*,SAFB*	3	0.75	SAFB2: Q14151_p_2_1, SAFB: Q15424_p_2_1, YTHDC1: Q96MU7_p_2_1	GO:0050684	regulation of mRNA processing
ER	GO:0030033	microvillus assembly (GO:0030033)	3/15	0.000165896	0.0118892	34.4462	299.825	MINK1*,TNIK*,MAP4K4*	3	1	MAP4K4: O95819_p_1_1, MINK1: Q8N4C8_p_1_1, TNIK: Q9UKE5_p_1_1	GO:0032528	microvillus organization
ER	GO:0120039	plasma membrane bounded cell projection morphogenesis (GO:0120039)	4/52	0.000576626	0.0365684	11.5414	86.0792	MINK1*,TNIK*,DBN1*,MAP4K4*	4	1	MAP4K4: O95819_p_1_1, DBN1: Q16643_p_1_1, MINK1: Q8N4C8_p_1_1, TNIK: Q9UKE5_p_1_1	GO:0120039	plasma membrane bounded cell
ER	GO:0048812	neuron projection morphogenesis (GO:0048812)	6/140	0.000595299	0.0365684	6.26199	46.5043	SPTBN4,MINK1*,SLITRK5,TNIK*,DBN1*,MAP4K4*	4	0.67	MAP4K4: O95819_p_1_1, DBN1: Q16643_p_1_1, MINK1: Q8N4C8_p_1_1, TNIK: Q9UKE5_p_1_1	GO:0120039	plasma membrane bounded cell
ER	GO:0000381	regulation of alternative mRNA splicing, via spliceosome (GO:0000381)	4/54	0.000665985	0.0381832	11.0786	81.0316	RBM25*,RBM15B,YTHDC1*,RBM5	2	0.5	RBM25: P49756_p_3_1; P49756_p_4_1; P49756_p_8_1, YTHDC1: Q96MU7_p_2_1	GO:0050684	regulation of mRNA processing
ER	GO:0071427	mRNA-containing ribonucleoprotein complex export from nucleus (GO:0071427)	5/99	0.000823082	0.0442407	7.40148	52.5687	RBM15B,FIP1L1*,YTHDC1*,DHX38*,UPF3B*	4	0.8	FIP1L1: Q6UN15_p_4_1, DHX38: Q92620_p_1_1; Q92620_p_2_1, YTHDC1: Q96MU7_p_2_1, UPF3B: Q9BZI7_p_2_1; Q9BZI7_p_3_1; Q9BZI7_p_4_1; Q9BZI7_p_5_1	GO:0006405	RNA export from nucleus
ER	GO:0007015	actin filament organization (GO:0007015)	6/152	0.000915425	0.0459849	5.74381	40.1844	FHOD3*,MPRIP*,TPM4*,KASH5,MYO6*,DBN1*	5	0.83	TPM4: P67936_p_1_1, DBN1: Q16643_p_1_1, FHOD3: Q2V2M9_p_1_1, MPRIP: Q6WCQ1_p_3_1, MYO6: Q9UM54_p_2_1	GO:0097435	supramolecular fiber organization
ER	GO:0051028	mRNA transport (GO:0051028)	5/104	0.00102776	0.0459849	7.02589	48.3408	RBM15B,FIP1L1*,YTHDC1*,DHX38*,UPF3B*	4	0.8	FIP1L1: Q6UN15_p_4_1, DHX38: Q92620_p_1_1; Q92620_p_2_1, YTHDC1: Q96MU7_p_2_1, UPF3B: Q9BZI7_p_2_1; Q9BZI7_p_3_1; Q9BZI7_p_4_1; Q9BZI7_p_5_1	GO:0051028	mRNA transport
ER	GO:0046328	regulation of JNK cascade (GO:0046328)	5/105	0.00107285	0.0459849	6.95528	47.5563	NCOR1*,MINK1*,MARVELD3*,RIPK1*,MAP4K4*	5	1	NCOR1: O75376_p_6_1; O75376_p_7_1, MAP4K4: O95819_p_1_1, RIPK1: Q13546_p_1_1, MINK1: Q8N4C8_p_1_1, MARVELD3: Q96A59_p_1_1	GO:0007165	signal transduction
ER	GO:0006405	RNA export from nucleus (GO:0006405)	5/106	0.00111939	0.0459849	6.88607	46.7906	RBM15B,FIP1L1*,YTHDC1*,DHX38*,UPF3B*	4	0.8	FIP1L1: Q6UN15_p_4_1, DHX38: Q92620_p_1_1; Q92620_p_2_1, YTHDC1: Q96MU7_p_2_1, UPF3B: Q9BZI7_p_2_1; Q9BZI7_p_3_1; Q9BZI7_p_4_1; Q9BZI7_p_5_1	GO:0006405	RNA export from nucleus
ER	GO:0006406	mRNA export from nucleus (GO:0006406)	5/107	0.00116741	0.0459849	6.81821	46.0432	RBM15B,FIP1L1*,YTHDC1*,DHX38*,UPF3B*	4	0.8	FIP1L1: Q6UN15_p_4_1, DHX38: Q92620_p_1_1; Q92620_p_2_1, YTHDC1: Q96MU7_p_2_1, UPF3B: Q9BZI7_p_2_1; Q9BZI7_p_3_1; Q9BZI7_p_4_1; Q9BZI7_p_5_1	GO:0006405	RNA export from nucleus
ER	GO:0097435	supramolecular fiber organization (GO:0097435)	9/351	0.00117636	0.0459849	3.72063	25.0969	CCDC88B*,MPRIP*,TPM4*,MAP7D3*,KASH5,MYO6*,TCHH*,RIPK1*,DBN1*	8	0.89	CCDC88B: A6NC98_p_3_1, TPM4: P67936_p_1_1, TCHH: Q07283_p_10_1; Q07283_p_11_1; Q07283_p_7_1, RIPK1: Q13546_p_1_1, DBN1: Q16643_p_1_1, MPRIP: Q6WCQ1_p_3_1, MAP7D3: Q8IWC1_p_2_1, MYO6: Q9UM54_p_2_1	GO:0097435	supramolecular fiber organization
EK	GO:0006397	mRNA processing (GO:0006397)	21/300	1.07389e-10	1.50345e-07	6.66471	152.986	ZRSR2*,SF3B2,IK*,SRRT,WBP4,PRPF40A,CWC25*,THOC2*,GTF2F1,U2SURP,SRRM1,PNN,SON,PUF60,RBMX2,DHX15*,SNRPB2*,SLU7*,RBM10,SRSF11,RBM5	7	0.33	DHX15: O43143_p_3_1, SLU7: O95391_p_2_1, SNRPB2: P08579_p_1_1, IK: Q13123_p_2_1, ZRSR2: Q15696_p_3_1, THOC2: Q8NI27_p_2_1, CWC25: Q9NXE8_p_2_1; Q9NXE8_p_3_1	GO:0006396	RNA processing
EK	GO:0000377	RNA splicing, via transesterification reactions with bulged adenosine as nucleophile (GO:0000377)	19/251	2.29005e-10	1.60304e-07	7.20358	159.9	ZRSR2*,SF3B2,IK*,SRRT,WBP4,PRPF40A,CWC25*,GTF2F1,U2SURP,SRRM1,PNN,PUF60,RBMX2,DHX15*,SNRPB2*,SLU7*,RBM10,SRSF11,RBM5	6	0.32	DHX15: O43143_p_3_1, SLU7: O95391_p_2_1, SNRPB2: P08579_p_1_1, IK: Q13123_p_2_1, ZRSR2: Q15696_p_3_1, CWC25: Q9NXE8_p_2_1; Q9NXE8_p_3_1	GO:0006396	RNA processing
EK	GO:0000398	mRNA splicing, via spliceosome (GO:0000398)	19/274	1.00683e-09	4.69852e-07	6.54612	135.613	ZRSR2*,SF3B2,IK*,SRRT,WBP4,PRPF40A,CWC25*,GTF2F1,U2SURP,SRRM1,PNN,PUF60,RBMX2,DHX15*,SNRPB2*,SLU7*,RBM10,SRSF11,RBM5	6	0.32	DHX15: O43143_p_3_1, SLU7: O95391_p_2_1, SNRPB2: P08579_p_1_1, IK: Q13123_p_2_1, ZRSR2: Q15696_p_3_1, CWC25: Q9NXE8_p_2_1; Q9NXE8_p_3_1	GO:0006396	RNA processing
EK	GO:0060401	cytosolic calcium ion transport (GO:0060401)	6/28	8.67841e-07	0.000303744	22.9056	319.699	TRPM1,AFG3L2,ATP2B3*,CACNA1C*,ATP2B1*,MICU1	3	0.5	ATP2B1: P20020_p_4_1; P20020_p_5_1, CACNA1C: Q13936_p_3_1, ATP2B3: Q16720_p_2_1	GO:0030001	metal ion transport
EK	GO:0070588	calcium ion transmembrane transport (GO:0070588)	8/87	1.01896e-05	0.00285308	8.55327	98.3125	TRPM1,AFG3L2,SLC24A1*,CACNA1A,ATP2B3*,CACNA1C*,ATP2B1*,MICU1	4	0.5	SLC24A1: O60721_p_3_1, ATP2B1: P20020_p_4_1; P20020_p_5_1, CACNA1C: Q13936_p_3_1, ATP2B3: Q16720_p_2_1	GO:0030001	metal ion transport
EK	GO:0008380	RNA splicing (GO:0008380)	8/98	2.44944e-05	0.00571536	7.50367	79.667	ZRSR2*,SF3B2,WBP4,DHX15*,PPIG*,SLU7*,SRSF11,SRRM1	4	0.5	DHX15: O43143_p_3_1, SLU7: O95391_p_2_1, PPIG: Q13427_p_1_1, ZRSR2: Q15696_p_3_1	GO:0006396	RNA processing
EK	GO:1901897	regulation of relaxation of cardiac muscle (GO:1901897)	3/6	3.3646e-05	0.0067292	83.0084	854.955	CHGA,PDE4D,HRC	0	0		GO:1901897	regulation of relaxation of cardiac muscle
EK	GO:0006396	RNA processing (GO:0006396)	10/179	6.52395e-05	0.0114169	5.01806	48.3613	ZRSR2*,SF3B2,SON,WBP4,DHX15*,PPIG*,SLU7*,RBM5,SRSF11,SRRM1	4	0.4	DHX15: O43143_p_3_1, SLU7: O95391_p_2_1, PPIG: Q13427_p_1_1, ZRSR2: Q15696_p_3_1	GO:0006396	RNA processing
EK	GO:0050852	T cell receptor signaling pathway (GO:0050852)	9/158	0.000130478	0.0193537	5.10559	45.6659	PAK1,PSMD7*,FYB1*,PSMA4*,PDE4D,PSME1*,PSMD1*,PAK3,PAK2	5	0.56	FYB1: O15117_p_1_1; O15117_p_2_1, PSMA4: P25789_p_1_1, PSMD7: P51665_p_2_1, PSME1: Q06323_p_1_1, PSMD1: Q99460_p_3_1	GO:0007165	signal transduction
EK	GO:0006357	regulation of transcription by RNA polymerase II (GO:0006357)	46/2206	0.000144053	0.0193537	1.92202	17.0009	SP100*,GABPB2,NKAP,MED19,ARID4A,RSF1,RTF1*,HMGB1*,CHD3,MECP2,PAGR1,ZNF608,RAD21*,NFATC2IP,SAFB2,TP53BP1,HOXC8*,BRD4,BRD3,BRD2,TCF7L2,PPP1R12A*,LARP7,ATP1B4*,ZFP91,INO80*,INHBA,DEK*,ZNF35,SMARCA1,GTF2F1,ST18,NCOR2,MLLT10,NCOR1,SP4,TNIP3*,PHF14*,NCOA7*,TCF3,PAXBP1,HDGFL2*,ZNF653,TAF3*,TNRC6A*,EZH2	15	0.33	PPP1R12A: O14974_p_3_1, RAD21: O60216_p_2_1, PHF14: O94880_p_2_1; O94880_p_3_1; O94880_p_4_1, HMGB1: P09429_p_1_1, SP100: P23497_p_5_1, HOXC8: P31273_p_1_1, DEK: P35659_p_2_1, TAF3: Q5VWG9_p_6_1; Q5VWG9_p_7_1; Q5VWG9_p_8_1, HDGFL2: Q7Z4V5_p_7_1, TNRC6A: Q8NDV7_p_1_1, NCOA7: Q8NI08_p_1_1, RTF1: Q92541_p_5_1, TNIP3: Q96KP6_p_1_1, INO80: Q9ULG1_p_5_1, ATP1B4: Q9UN42_p_2_1	GO:2001141	regulation of RNA biosynthetic process
EK	GO:0010880	regulation of release of sequestered calcium ion into cytosol by sarcoplasmic reticulum (GO:0010880)	4/23	0.000152065	0.0193537	17.535	154.154	PDE4D,HRC,CACNA1C*,TRDN	1	0.25	CACNA1C: Q13936_p_3_1	GO:0010880	regulation of release of sequestered calcium ion into cytosol by sarcoplasmic reticulum
EK	GO:0033151	V(D)J recombination (GO:0033151)	3/11	0.000265448	0.0289539	31.1203	256.247	LIG1*,HMGB1*,TCF3	2	0.67	HMGB1: P09429_p_1_1, LIG1: P18858_p_1_1	GO:0033151	V(D)J recombination
EK	GO:0038061	NIK/NF-kappaB signaling (GO:0038061)	6/74	0.000268858	0.0289539	7.39337	60.7833	CARD10*,PSMD7*,PSMA4*,PSME1*,PSMD1*,ZFP91	5	0.83	PSMA4: P25789_p_1_1, PSMD7: P51665_p_2_1, PSME1: Q06323_p_1_1, PSMD1: Q99460_p_3_1, CARD10: Q9BWT7_p_2_1	GO:0007165	signal transduction
EK	GO:0070509	calcium ion import (GO:0070509)	4/28	0.000335381	0.0306938	13.8783	111.03	AFG3L2,CACNA1A,CACNA1C*,MICU1	1	0.25	CACNA1C: Q13936_p_3_1	GO:0030001	metal ion transport
EK	GO:0031116	positive regulation of microtubule polymerization (GO:0031116)	4/28	0.000335381	0.0306938	13.8783	111.03	MECP2,PAK1,CLIP1*,NAV3	1	0.25	CLIP1: P30622_p_1_1	GO:0031116	positive regulation of microtubule polymerization
EK	GO:1901844	regulation of cell communication by electrical coupling involved in cardiac conduction (GO:1901844)	3/12	0.000350787	0.0306938	27.6611	220.053	PDE4D,HRC,TRDN	0	0		GO:0008016	regulation of heart contraction
EK	GO:0050851	antigen receptor-mediated signaling pathway (GO:0050851)	9/185	0.000422246	0.0343936	4.31639	33.538	PAK1,PSMD7*,FYB1*,PSMA4*,PDE4D,PSME1*,PSMD1*,PAK3,PAK2	5	0.56	FYB1: O15117_p_1_1; O15117_p_2_1, PSMA4: P25789_p_1_1, PSMD7: P51665_p_2_1, PSME1: Q06323_p_1_1, PSMD1: Q99460_p_3_1	GO:0007165	signal transduction
EK	GO:0010649	regulation of cell communication by electrical coupling (GO:0010649)	3/13	0.000451974	0.0343936	24.8937	191.728	PDE4D,HRC,TRDN	0	0		GO:0010649	regulation of cell communication by electrical coupling
EK	GO:1990858	cellular response to lectin (GO:1990858)	7/115	0.000491337	0.0343936	5.44306	41.4673	PAK1,PSMD7*,PSMA4*,PSME1*,PSMD1*,PAK3,PAK2	4	0.57	PSMA4: P25789_p_1_1, PSMD7: P51665_p_2_1, PSME1: Q06323_p_1_1, PSMD1: Q99460_p_3_1	GO:1990858	cellular response to lectin
EK	GO:0002223	stimulatory C-type lectin receptor signaling pathway (GO:0002223)	7/115	0.000491337	0.0343936	5.44306	41.4673	PAK1,PSMD7*,PSMA4*,PSME1*,PSMD1*,PAK3,PAK2	4	0.57	PSMA4: P25789_p_1_1, PSMD7: P51665_p_2_1, PSME1: Q06323_p_1_1, PSMD1: Q99460_p_3_1	GO:0007165	signal transduction
EK	GO:0051168	nuclear export (GO:0051168)	6/84	0.000533856	0.0355904	6.44223	48.5447	WASHC4*,POM121*,THOC2*,SLU7*,SRSF11,SRRM1	4	0.67	SLU7: O95391_p_2_1, WASHC4: Q2M389_p_1_1, THOC2: Q8NI27_p_2_1, POM121: Q96HA1_p_3_1	GO:0051168	nuclear export
EK	GO:0045860	positive regulation of protein kinase activity (GO:0045860)	8/154	0.000570574	0.0363093	4.61238	34.4493	ETAA1*,HSP90AA1*,PAK1,INCENP*,CLSPN,PAK3,PAK2,EZH2	3	0.38	HSP90AA1: P07900_p_1_1, INCENP: Q9NQS7_p_7_1; Q9NQS7_p_8_1, ETAA1: Q9NY74_p_1_1	GO:0045860	positive regulation of protein kinase activity
EK	GO:0002220	innate immune response activating cell surface receptor signaling pathway (GO:0002220)	7/119	0.000603232	0.0367185	5.2476	38.9015	PAK1,PSMD7*,PSMA4*,PSME1*,PSMD1*,PAK3,PAK2	4	0.57	PSMA4: P25789_p_1_1, PSMD7: P51665_p_2_1, PSME1: Q06323_p_1_1, PSMD1: Q99460_p_3_1	GO:0007165	signal transduction
EK	GO:0048024	regulation of mRNA splicing, via spliceosome (GO:0048024)	6/90	0.000770225	0.0431525	5.98024	42.8713	RBM25,SON,PUF60,SFSWAP,LARP7,RBM5	0	0		GO:0050684	regulation of mRNA processing
EK	GO:0035567	non-canonical Wnt signaling pathway (GO:0035567)	7/124	0.000770581	0.0431525	5.02206	36	TCF7L2,PSMD7*,PSMA4*,DAAM1*,PSME1*,PSMD1*,TNRC6A*	6	0.86	PSMA4: P25789_p_1_1, PSMD7: P51665_p_2_1, PSME1: Q06323_p_1_1, TNRC6A: Q8NDV7_p_1_1, PSMD1: Q99460_p_3_1, DAAM1: Q9Y4D1_p_4_1	GO:0007165	signal transduction
EK	GO:1902806	regulation of cell cycle G1/S phase transition (GO:1902806)	4/36	0.000894761	0.0474545	10.4045	73.029	PAGR1,PSME1*,INO80*,EZH2	2	0.5	PSME1: Q06323_p_1_1, INO80: Q9ULG1_p_5_1	GO:1902806	regulation of cell cycle G1/S phase transition
EK	GO:0008016	regulation of heart contraction (GO:0008016)	6/93	0.000915194	0.0474545	5.77315	40.3911	PDE4D,TNNT2*,HRC,ATP2B3*,ATP2B1*,TRDN	3	0.5	ATP2B1: P20020_p_4_1; P20020_p_5_1, TNNT2: P45379_p_4_1, ATP2B3: Q16720_p_2_1	GO:0008016	regulation of heart contraction
DE	GO:0006357	regulation of transcription by RNA polymerase II (GO:0006357)	131/2206	2.94268e-19	6.91235e-16	2.73135	116.546	APP,ZNF692*,PRDM4,MYT1*L,ARID4A*,PRDM2,ARID4B*,ZBTB22,NOC2L,DCAF1*,YY1,SALL2,BBX,HOXA7,PKNOX2,SOX5,PIAS4,KDM2A,FST,SOX11,SOX12,DICER1,GTF2F1,MYT1*,MYCL,MYCN,KAT6B,KAT6A,ERF,ZNF316,HDGFL2,ZSCAN29,HOMEZ,CASZ1,ARX,NOP2,BAZ2B,RTF1,FOXO3,PRDM10,ZBTB4,SLC9A1,NEUROD1,RAD21*,NACC2,PRDM16,TPR,NACC1,HIVEP3,ZNF787,HIVEP2,ZBTB7B,NKX6-1,ZBTB7A,PPARGC1B,ZKSCAN1,ZBED4,ZBTB7C,DR1,BCL11A*,SUPT5H,DRAP1,ZBTB9,CREBR…	19	0.15	CHD2: O14647_p_6_1, HMGB3: O15347_p_2_1, RAD21: O60216_p_3_1, HMGB1: P09429_p_2_1, SP100: P23497_p_6_1, CALR: P27797_p_2_1, ARID4A: P29374_p_2_1, DEK: P35659_p_1_1, IGBP1: P78318_p_2_1, MYT1: Q01538_p_2_1, FOXD4: Q12950_p_1_1, ARID4B: Q4LE39_p_2_1, PHF6: Q8IWS0_p_3_1, PELP1: Q8IZL8_p_6_1, CSRNP3: Q8WYN3_p_1_1, ZNF692: Q9BU19_p_2_1, PCGF6: Q9BYE7_p_1_1, BCL11A: Q9H165_p_3_1, DCAF1: Q9Y4B6_p_3_1	GO:2001141	regulation of RNA biosynthetic process
DE	GO:0006355	regulation of transcription, DNA-templated (GO:0006355)	124/2244	1.00773e-15	1.18358e-12	2.48077	85.6637	ZNF692*,MYT1*L,ARID4A*,PRDM2,ARID4B*,ZBTB22,CCAR1,YY1,SALL2,BBX,ZNF326,HOXA7,PKNOX2,SOX5,PIAS4,DAXX,KDM2A,THOC1,SOX11,SOX12,MYT1*,MYCL,MYCN,KAT6B,KAT6A,ERF,TIMELESS,ZNF316,HDGFL2,ZSCAN29,HOMEZ,CASZ1,SET,L3MBTL2,ARX,NOP2,BAZ2B,FOXO3,ZBTB4,NEUROD1,RAD21*,NACC2,PRDM16,NACC1,HIVEP3,ZNF787,HIVEP2,ZBTB7B,NKX6-1,ZBTB7A,PPARGC1B,ZKSCAN1,ZBTB7C,BRPF1,BCL11A*,DENND4A,SUPT5H,DRAP1,ZBTB9,GON4L,CREBRF,PHF14,C…	17	0.14	CHD2: O14647_p_6_1, HMGB3: O15347_p_2_1, RAD21: O60216_p_3_1, CDC45: O75419_p_2_1, HMGB1: P09429_p_2_1, SP100: P23497_p_6_1, CALR: P27797_p_2_1, ARID4A: P29374_p_2_1, DEK: P35659_p_1_1, MYT1: Q01538_p_2_1, FOXD4: Q12950_p_1_1, ARID4B: Q4LE39_p_2_1, PHF6: Q8IWS0_p_3_1, CSRNP3: Q8WYN3_p_1_1, ZNF692: Q9BU19_p_2_1, PCGF6: Q9BYE7_p_1_1, BCL11A: Q9H165_p_3_1	GO:2001141	regulation of RNA biosynthetic process
DE	GO:0006351	transcription, DNA-templated (GO:0006351)	29/221	1.44686e-12	1.13289e-09	5.77644	157.475	GTF3C1,GTF2A1,GTF3C3,GTF3C5,RSF1,TAF1L,RTF1,TTF2,RPAP1,FOXO3,GTF2E1,SUPT6H,LEO1,UBTF,ZBTB7B,SOX5,BTF3,RNGTT,DEK*,GTF2F1,SUPT5H,DRAP1,XAB2,TFDP1,ERCC3,ERCC6,TAF5,PTMA,TAF1	1	0.03	DEK: P35659_p_1_1	GO:0006351	transcription, DNA-templated
DE	GO:0006338	chromatin remodeling (GO:0006338)	20/103	3.03946e-12	1.78492e-09	9.10496	241.457	MBD3,HDAC5,DAXX,DR1,PBRM1,NPM1,NPM2,HDAC1,CHD8,CHD4,RSF1,BAZ2B,CHD3,BAZ1B,SIRT1,PAK1,ERCC6,JARID2,ZBTB7A,MPND	0	0		GO:0006325	chromatin organization
DE	GO:0006325	chromatin organization (GO:0006325)	22/142	2.77504e-11	1.30371e-08	6.94119	168.725	HDAC5,DAXX,DR1,PBRM1,NPM1,NPM2,HDAC1,HP1BP3,HMGB2,RSF1,BAZ2B,BAZ1B,SUPT6H,CHD1,SIRT1,PAK1,MECOM,PRDM16,PWWP3A,JARID2,ZBTB7A,MPND	0	0		GO:0006325	chromatin organization
DE	GO:0045892	negative regulation of transcription, DNA-templated (GO:0045892)	61/948	1.6991e-10	6.65199e-08	2.70714	60.899	ZNF692*,MYT1L,CHD8,HMGB2,ARID4A*,RSF1,PRDM2,HMGB1*,CHD3,NOC2L,PHF6*,DCAF1*,YY1,MECOM,HOXA7,JARID2,PIAS4,DAXX,FOXD1,KDM2A,FST,SOX11,DICER1,SIRT1,TFDP2,KAT6B,KAT6A,ERF,TIMELESS,HMX1,HDAC5,SP100*,SET,L3MBTL2,HDAC1,RTF1,FOXO3,ZBTB4,NACC2,PRDM16,TPR,NACC1,APBB1,ZBTB7B,SAMD1,NKX6-1,ZBTB7A,IGBP1*,IRX2,PCGF6*,DR1,BCL11A*,IRX3,SUPT5H,PEX14,DRAP1,TRIM37,CALR*,TCF3,BAP1,TAF1	10	0.16	HMGB1: P09429_p_2_1, SP100: P23497_p_6_1, CALR: P27797_p_2_1, ARID4A: P29374_p_2_1, IGBP1: P78318_p_2_1, PHF6: Q8IWS0_p_3_1, ZNF692: Q9BU19_p_2_1, PCGF6: Q9BYE7_p_1_1, BCL11A: Q9H165_p_3_1, DCAF1: Q9Y4B6_p_3_1	GO:2001141	regulation of RNA biosynthetic process
DE	GO:0045944	positive regulation of transcription by RNA polymerase II (GO:0045944)	55/908	1.2126e-08	4.06915e-06	2.51088	45.768	APP,CSRNP3*,PRDM4,CHD8,HMGB2,RSF1,PRDM2,WASL,HMGB1*,PKD2,YY1,SALL2,HOXA7,MYBL1,PELP1*,PPP1R12A,SOX11,SOX12,GTF2F1,SIRT1,SETSIP,HAX1,TFDP1,MYCN,TFDP2,KAT6B,KAT6A,IRF6,MPND,HDAC5,CASZ1,HDAC1,WAS,FOXO3,PRDM10,SUPT6H,SLC9A1,NEUROD1,LEO1,BRD8,APBB1,NKX6-1,PPARGC1B,ZBED4,DR1,NPM1,IRX3,ATAD2,SUPT5H,DRAP1,CREBRF,CEBPZ,TCF3,ZNF335,PAXBP1	3	0.05	HMGB1: P09429_p_2_1, PELP1: Q8IZL8_p_6_1, CSRNP3: Q8WYN3_p_1_1	GO:2001141	regulation of RNA biosynthetic process
DE	GO:0045893	positive regulation of transcription, DNA-templated (GO:0045893)	65/1183	2.31479e-08	6.7968e-06	2.27949	40.0766	APP,CSRNP3*,PRDM4,CHD8,HMGB2,RSF1,PRDM2,WASL,HMGB1*,PKD2,WDR43,YY1,MECOM,SALL2,UBTF,HOXA7,MYBL1,PELP1*,PPP1R12A,THOC1,SOX11,SOX12,GTF2F1,SIRT1,SETSIP,HAX1,TFDP1,MYCN,TFDP2,KAT6B,KAT6A,IRF6,MPND,HDAC5,CASZ1,SP100*,HDAC1,WAS,TAF1L,FOXO3,PRDM10,SLC9A1,NEUROD1,PRDM16,HIVEP3,BRD8,APBB1,NKX6-1,PPARGC1B,ZBED4,DR1,NPM1,BRPF1,IRX3,ATAD2,SUPT5H,KLF1,DRAP1,CREBRF,CEBPZ,TCF3,ERCC6,NAA15,ZNF335,PAXBP1	4	0.06	HMGB1: P09429_p_2_1, SP100: P23497_p_6_1, PELP1: Q8IZL8_p_6_1, CSRNP3: Q8WYN3_p_1_1	GO:2001141	regulation of RNA biosynthetic process
DE	GO:0006334	nucleosome assembly (GO:0006334)	12/58	3.31495e-08	8.65202e-06	9.72428	167.474	BRD2,DAXX,NPM1,CHAF1A,KAT6B,GRWD1*,UBN1,HMGB2,NAP1L2,RSF1,ANP32B,SPTY2D1	1	0.08	GRWD1: Q9BQ67_p_1_1	GO:0006325	chromatin organization
DE	GO:0031497	chromatin assembly (GO:0031497)	13/73	5.9148e-08	1.38939e-05	8.08625	134.581	BRD2,DAXX,NPM1,HMGB2,NAP1L2,RSF1,NOC2L,SPTY2D1,SIRT1,CHAF1A,KAT6B,GRWD1*,ANP32B	1	0.08	GRWD1: Q9BQ67_p_1_1	GO:0006325	chromatin organization
DE	GO:0034728	nucleosome organization (GO:0034728)	14/94	1.89752e-07	4.05206e-05	6.53704	101.177	BRD2,DAXX,NPM1,SET,HMGB2,NAP1L2,RSF1,SPTY2D1,SUPT6H,CHAF1A,KAT6B,GRWD1*,ANP32E,ANP32B	1	0.07	GRWD1: Q9BQ67_p_1_1	GO:0006325	chromatin organization
DE	GO:0000122	negative regulation of transcription by RNA polymerase II (GO:0000122)	41/684	1.2544e-06	0.000233188	2.43961	33.1514	HDAC5,ZNF692*,SP100*,MYT1L,HDAC1,CHD8,PRDM2,RTF1,HMGB1*,CHD3,NOC2L,FOXO3,PHF6*,ZBTB4,DCAF1*,YY1,NACC2,PRDM16,TPR,APBB1,HOXA7,ZBTB7B,NKX6-1,ZBTB7A,IGBP1*,IRX2,DR1,BCL11A*,FST,IRX3,SOX11,DICER1,SUPT5H,SIRT1,DRAP1,ERF,TRIM37,CALR*,TCF3,CC2D1A,TAF1	8	0.2	HMGB1: P09429_p_2_1, SP100: P23497_p_6_1, CALR: P27797_p_2_1, IGBP1: P78318_p_2_1, PHF6: Q8IWS0_p_3_1, ZNF692: Q9BU19_p_2_1, BCL11A: Q9H165_p_3_1, DCAF1: Q9Y4B6_p_3_1	GO:2001141	regulation of RNA biosynthetic process
DE	GO:0043044	ATP-dependent chromatin remodeling (GO:0043044)	9/42	1.29052e-06	0.000233188	10.1149	137.162	MBD3,PBRM1,HDAC1,CHD8,ANP32E,CHD4,CHD3,ERCC6,SPTY2D1	0	0		GO:0006325	chromatin organization
DE	GO:2000113	negative regulation of cellular macromolecule biosynthetic process (GO:2000113)	35/547	1.80819e-06	0.000303388	2.60191	34.4056	HDAC5,SET,L3MBTL2,HDAC1,CHD8,HMGB2,ARID4A*,RSF1,ZBTB4,MECOM,NACC2,PRDM16,NACC1,HOXA7,JARID2,SAMD1,ZBTB7A,TSPYL2*,PIAS4,DAXX,PCGF6*,FOXD1,PUS7,SIRT1,WAPL,PEX14,PATL2,TFDP2,KAT6B,NCL,KAT6A,TIMELESS,CALR*,BAP1,HMX1	4	0.11	CALR: P27797_p_2_1, ARID4A: P29374_p_2_1, PCGF6: Q9BYE7_p_1_1, TSPYL2: Q9H2G4_p_3_1	GO:2001141	regulation of RNA biosynthetic process
DE	GO:0042254	ribosome biogenesis (GO:0042254)	18/192	4.10418e-06	0.000642714	3.87539	48.0685	NOM1,RPS9,NPM1,UTP3,DDX10,NOLC1,NOC2L,SENP3,UTP18*,WDR43,BYSL,LSG1,LAS1L,BMS1,PES1*,MPHOSPH10,ESF1,PELP1*	3	0.17	PES1: O00541_p_1_1, PELP1: Q8IZL8_p_6_1, UTP18: Q9Y5J1_p_5_1	GO:0042254	ribosome biogenesis
DE	GO:0071103	DNA conformation change (GO:0071103)	6/18	4.92138e-06	0.000722521	18.4583	225.595	TOP2B,ERCC3,KAT6A,HMGB2,HMGB3*,HMGB1*	2	0.33	HMGB3: O15347_p_2_1, HMGB1: P09429_p_2_1	GO:0071103	DNA conformation change
DE	GO:1903507	negative regulation of nucleic acid-templated transcription (GO:1903507)	30/464	8.10773e-06	0.0011203	2.6156	30.6618	HDAC5,SET,L3MBTL2,HDAC1,CHD8,HMGB2,ARID4A*,RSF1,ZBTB4,MECOM,NACC2,PRDM16,NACC1,HOXA7,JARID2,SAMD1,ZBTB7A,PIAS4,DAXX,PCGF6*,FOXD1,SIRT1,PEX14,TFDP2,KAT6B,KAT6A,TIMELESS,CALR*,BAP1,HMX1	3	0.1	CALR: P27797_p_2_1, ARID4A: P29374_p_2_1, PCGF6: Q9BYE7_p_1_1	GO:1903507	negative regulation of nucleic acid-templated transcription
DE	GO:0006364	rRNA processing (GO:0006364)	16/173	1.65485e-05	0.00215958	3.80638	41.9052	RPS9,UTP3,NOP2,MAK16,DDX10,NOLC1,SENP3,UTP18*,WDR43,BYSL,LAS1L,BMS1,PES1*,MPHOSPH10,ESF1,PELP1*	3	0.19	PES1: O00541_p_1_1, PELP1: Q8IZL8_p_6_1, UTP18: Q9Y5J1_p_5_1	GO:0006396	RNA processing
DE	GO:0006366	transcription by RNA polymerase II (GO:0006366)	23/320	1.77742e-05	0.00219746	2.91087	31.8384	BTF3,GTF2A1,HDAC5,RNGTT,HDAC1,TAF1L,RTF1,TTF2,DEK*,RPAP1,GTF2F1,SUPT5H,GTF2E1,SUPT6H,DRAP1,TFDP1,ERCC3,LEO1,ERCC6,TAF5,ZBTB7B,SOX5,TAF1	1	0.04	DEK: P35659_p_1_1	GO:0006351	transcription, DNA-templated
DE	GO:1901796	regulation of signal transduction by p53 class mediator (GO:1901796)	15/156	1.90767e-05	0.00224056	3.96903	43.1316	MBD3,DAXX,BRPF1,RNF34,HDAC1,NOP2,CHD5,CHD4,TAF1L,CHD3,NOC2L,WRN,KAT6A,TAF5,TAF1	0	0		GO:0023051	regulation of signaling
DE	GO:0032528	microvillus organization (GO:0032528)	5/14	2.16378e-05	0.00242034	20.4735	219.907	MINK1,RAPGEF2,TNIK,RAPGEF6*,MAP4K4	1	0.2	RAPGEF6: Q8TEU7_p_1_1	GO:0032528	microvillus organization
DE	GO:0030033	microvillus assembly (GO:0030033)	5/15	3.17465e-05	0.00338966	18.4252	190.843	MINK1,RAPGEF2,TNIK,RAPGEF6*,MAP4K4	1	0.2	RAPGEF6: Q8TEU7_p_1_1	GO:0032528	microvillus organization
DE	GO:0031175	neuron projection development (GO:0031175)	15/171	5.58979e-05	0.00552932	3.58461	35.1004	APP,MINK1,DICER1,HMGB1*,WASL,PPP1R9A,PPP1R9B,PAK1,RAPGEF2,TNIK,ERCC6,PAK3,ZNF335,MNX1,MAP4K4	1	0.07	HMGB1: P09429_p_2_1	GO:0048468	cell development
DE	GO:0006265	DNA topological change (GO:0006265)	4/9	5.64937e-05	0.00552932	29.4321	287.887	TOP2B,ERCC3,HMGB2,HMGB1*	1	0.25	HMGB1: P09429_p_2_1	GO:0071103	DNA conformation change
DE	GO:0006397	mRNA processing (GO:0006397)	21/300	5.98734e-05	0.00562571	2.82082	27.4276	DBR1,RNGTT,DDX46,THOC1,DDX42,CWC15,DDX41,GTF2F1,WBP11,SUPT5H,CCAR1,EFTUD2,XAB2,HNRNPUL1,ERCC3,MFAP1,CD2BP2,SNIP1*,SLU7,CTNNBL1,SUGP1*	2	0.1	SUGP1: Q8IWZ8_p_1_1, SNIP1: Q8TAD8_p_1_1	GO:0006396	RNA processing
DE	GO:0043067	regulation of programmed cell death (GO:0043067)	16/194	6.71454e-05	0.00606633	3.35366	32.2242	DAXX,RBM25*,ANP32A,DDX42,FBXO10,SIRT1,RTN4,WRN,HAX1,MECOM,MADD,AKT1S1,ANP32E,ANP32B,CALR*,ZBTB7A	2	0.12	CALR: P27797_p_2_1, RBM25: P49756_p_9_1	GO:0043067	regulation of programmed cell death
DE	GO:0051123	RNA polymerase II preinitiation complex assembly (GO:0051123)	4/10	9.21725e-05	0.008019	24.5255	227.887	TAF7L,DR1,TAF1L,TAF1	0	0		GO:0006351	transcription, DNA-templated
DE	GO:0048812	neuron projection morphogenesis (GO:0048812)	13/140	9.71008e-05	0.00814606	3.80709	35.1766	APP,MINK1,DICER1,EIF2AK4,WASL,MAPK8IP2,PAK1,TNIK,APBB1,PAK3,ZNF335,MNX1,MAP4K4	0	0		GO:0120039	plasma membrane bounded cell
DE	GO:0034470	ncRNA processing (GO:0034470)	16/201	0.000102133	0.00827275	3.22559	29.6408	RPS9,TUT7,UTP3,DDX10,NOLC1,DICER1,SENP3,UTP18*,WDR43,BYSL,LAS1L,PES1*,BMS1,MPHOSPH10,ESF1,PELP1*	3	0.19	PES1: O00541_p_1_1, PELP1: Q8IZL8_p_6_1, UTP18: Q9Y5J1_p_5_1	GO:0006396	RNA processing
DE	GO:0016072	rRNA metabolic process (GO:0016072)	14/162	0.000115168	0.00901766	3.52114	31.9337	RPS9,UTP3,DDX10,NOLC1,SENP3,UTP18*,WDR43,BYSL,LAS1L,BMS1,PES1*,MPHOSPH10,ESF1,PELP1*	3	0.21	PES1: O00541_p_1_1, PELP1: Q8IZL8_p_6_1, UTP18: Q9Y5J1_p_5_1	GO:0016072	rRNA metabolic process
DE	GO:0065004	protein-DNA complex assembly (GO:0065004)	13/143	0.00012048	0.00912928	3.71865	33.5572	BRD2,DAXX,NPM1,HMGB2,NAP1L2,RSF1,SPTY2D1,CHAF1A,ERCC3,KAT6B,GRWD1*,ANP32B,MCM2	1	0.08	GRWD1: Q9BQ67_p_1_1	GO:0065004	protein-DNA complex assembly
DE	GO:0033151	V(D)J recombination (GO:0033151)	4/11	0.000141793	0.0104085	21.0208	186.268	DCAF1*,HMGB2,HMGB1*,TCF3	2	0.5	HMGB1: P09429_p_2_1, DCAF1: Q9Y4B6_p_3_1	GO:0033151	V(D)J recombination
DE	GO:2000112	regulation of cellular macromolecule biosynthetic process (GO:2000112)	27/468	0.000157015	0.0111766	2.30209	20.1644	ANKRD17,APP,CASZ1,HP1BP3,NOLC1,PRDM2,CHD3,SPTY2D1,FOXO3,ZBTB4,CCAR1,ASCC2,APBB1,MYBL1,PPARGC1B,DAXX,DENND4A,SOX11,SOX12,MYT1*,KLF1,DRAP1,GON4L,KAT6B,CALR*,TCF3,TAF5	2	0.07	CALR: P27797_p_2_1, MYT1: Q01538_p_2_1	GO:2001141	regulation of RNA biosynthetic process
DE	GO:0120031	plasma membrane bounded cell projection assembly (GO:0120031)	19/278	0.000181012	0.0125058	2.7414	23.6225	DMTN,EXOC8,MINK1,GBF1,SSTR3*,FGD1,CCDC28B,PPP1R9B,PCM1,FGD5,ABLIM1*,TTLL3,KIF3A,RAPGEF2,TNIK,IFT46,RAPGEF6*,CLUAP1,MAP4K4	3	0.16	ABLIM1: O14639_p_1_1, SSTR3: P32745_p_2_1, RAPGEF6: Q8TEU7_p_1_1	GO:0120031	plasma membrane bounded cell projection assembly
DE	GO:0032446	protein modification by small protein conjugation (GO:0032446)	24/409	0.00028043	0.0186928	2.33699	19.1147	PIAS4,CUL9,ATG3,AREL1,RNF34,TRIM41,FBXW7,BCL11A*,RTF1,FBXO10,RANGAP1,SIRT1,PEX14,IFIH1,CAND1,OS9*,UBE2R2,UVSSA,HECW1,TPR,LEO1,ARIH2,ARIH1,TRIM55	2	0.08	OS9: Q13438_p_4_1, BCL11A: Q9H165_p_3_1	GO:0032446	protein modification by small protein conjugation
DE	GO:0010649	regulation of cell communication by electrical coupling (GO:0010649)	4/13	0.000294438	0.0186928	16.3478	132.915	IRX3,CASQ2*,HRC,TRDN	1	0.25	CASQ2: O14958_p_1_1	GO:0010649	regulation of cell communication by electrical coupling
DE	GO:0070897	transcription preinitiation complex assembly (GO:0070897)	4/13	0.000294438	0.0186928	16.3478	132.915	TAF7L,DR1,TAF1L,TAF1	0	0		GO:0006351	transcription, DNA-templated
DE	GO:1902531	regulation of intracellular signal transduction (GO:1902531)	25/437	0.000309129	0.0191091	2.27608	18.3947	RNF34,HDAC1,NOP2,CHD4,TAF1L,CHD3,NOC2L,FGD1,STK3,SYDE1,WRN,PAK1,ARHGDIB,PAK3,PAK2,MAP4K4,MBD3,DAXX,BRPF1,MINK1,ARAP1,KAT6A,TNIK,TAF5,TAF1	0	0		GO:0023051	regulation of signaling
DE	GO:0042791	5S class rRNA transcription by RNA polymerase III (GO:0042791)	3/6	0.000354487	0.0208172	36.7245	291.77	GTF3C1,GTF3C3,GTF3C5	0	0		GO:0016072	rRNA metabolic process
DE	GO:0060563	neuroepithelial cell differentiation (GO:0060563)	3/6	0.000354487	0.0208172	36.7245	291.77	BCCIP,SOX11,DSPP	0	0		GO:0030154	cell differentiation
DE	GO:0070828	heterochromatin organization (GO:0070828)	4/14	0.000403559	0.02268	14.7123	114.979	MECOM,HP1BP3,PRDM16,SIRT1	0	0		GO:0006325	chromatin organization
DE	GO:0000398	mRNA splicing, via spliceosome (GO:0000398)	18/274	0.00042761	0.02268	2.62286	20.3463	SRPK2,DBR1,DDX46,DDX42,CWC15,DDX41,GTF2F1,WBP11,CCAR1,EFTUD2,XAB2,HNRNPUL1,MFAP1,CD2BP2,SNIP1*,SLU7,CTNNBL1,SUGP1*	2	0.11	SUGP1: Q8IWZ8_p_1_1, SNIP1: Q8TAD8_p_1_1	GO:0006396	RNA processing
DE	GO:0033365	protein localization to organelle (GO:0033365)	12/142	0.000427821	0.02268	3.42602	26.5749	PPP1R15A,TUB,APP,RIPOR1,CCDC47,LMNA,GBF1,WASHC2C,CALR*,TULP1*,ZBTB7A,WASHC2A	2	0.17	TULP1: O00294_p_1_1, CALR: P27797_p_2_1	GO:0033365	protein localization to organelle
DE	GO:0000377	RNA splicing, via transesterification reactions with bulged adenosine as nucleophile (GO:0000377)	17/251	0.000432473	0.02268	2.70789	20.9753	DBR1,DDX46,DDX42,CWC15,DDX41,GTF2F1,WBP11,CCAR1,EFTUD2,XAB2,HNRNPUL1,MFAP1,CD2BP2,SNIP1*,SLU7,CTNNBL1,SUGP1*	2	0.12	SUGP1: Q8IWZ8_p_1_1, SNIP1: Q8TAD8_p_1_1	GO:0006396	RNA processing
DE	GO:0120039	plasma membrane bounded cell projection morphogenesis (GO:0120039)	7/52	0.000434484	0.02268	5.74373	44.4642	PAK1,MINK1,DICER1,TNIK,ZNF335,MNX1,MAP4K4	0	0		GO:0120039	plasma membrane bounded cell
DE	GO:0032786	positive regulation of DNA-templated transcription, elongation (GO:0032786)	5/25	0.000450542	0.023007	9.20786	70.9471	LEO1,THOC1,ERCC6,SUPT5H,SUPT6H	0	0		GO:2001141	regulation of RNA biosynthetic process
DE	GO:0043666	regulation of phosphoprotein phosphatase activity (GO:0043666)	6/38	0.000465543	0.0232673	6.91473	53.0519	PPP1R15A,PPP1R2,PPP1R12A,PPP1R2B,PPP6R1,PPP1R1B	0	0		GO:0043666	regulation of phosphoprotein phosphatase activity
DE	GO:0016573	histone acetylation (GO:0016573)	8/71	0.000588289	0.0287894	4.69333	34.9104	DR1,BRPF1,KAT6B,KAT6A,CHD5,APBB1,BRD8,TAF5	0	0		GO:0006325	chromatin organization
DE	GO:0042797	tRNA transcription by RNA polymerase III (GO:0042797)	3/7	0.000608072	0.0291502	27.542	203.954	GTF3C1,GTF3C3,GTF3C5	0	0		GO:0006351	transcription, DNA-templated
DE	GO:0032784	regulation of DNA-templated transcription, elongation (GO:0032784)	5/28	0.000780297	0.0366583	8.0056	57.2868	THOC1,ZNF326,ERCC6,SUPT5H,WDR43	0	0		GO:2001141	regulation of RNA biosynthetic process
DE	GO:0043966	histone H3 acetylation (GO:0043966)	6/42	0.000808532	0.03724	6.14516	43.7553	DR1,BRPF1,KAT6B,KAT6A,PHF14,TAF5	0	0		GO:0006325	chromatin organization
DE	GO:0045860	positive regulation of protein kinase activity (GO:0045860)	12/154	0.000883366	0.0399044	3.13455	22.0414	DAXX,PAK1,MINK1,RAPGEF2,TNIK,CLSPN,PAK3,SRCIN1,PAK2,TTBK1*,STK3,MAP4K4	1	0.08	TTBK1: Q5TCY1_p_3_1	GO:0045860	positive regulation of protein kinase activity
DE	GO:0032071	regulation of endodeoxyribonuclease activity (GO:0032071)	3/8	0.00095368	0.0407308	22.0325	153.24	NPM1,HMGB1*,SIRT1	1	0.33	HMGB1: P09429_p_2_1	GO:0032071	regulation of endodeoxyribonuclease activity
DE	GO:0000012	single strand break repair (GO:0000012)	3/8	0.00095368	0.0407308	22.0325	153.24	APLF,ERCC6,SIRT1	0	0		GO:0000012	single strand break repair
DE	GO:0009304	tRNA transcription (GO:0009304)	3/8	0.00095368	0.0407308	22.0325	153.24	GTF3C1,GTF3C3,GTF3C5	0	0		GO:0006351	transcription, DNA-templated
DE	GO:0006417	regulation of translation (GO:0006417)	13/178	0.00100195	0.0420283	2.92455	20.1963	APP,NPM1,NOLC1,EIF2AK4,PUS7,FOXO3,PATL2,EIF5,NEMF,NCL,CALR*,EIF3C*,EIF3D*	3	0.23	EIF3D: O15371_p_1_1, CALR: P27797_p_2_1, EIF3C: Q99613_p_5_1	GO:2001141	regulation of RNA biosynthetic process
AE	GO:0006357	regulation of transcription by RNA polymerase II (GO:0006357)	34/2206	4.91614e-05	0.0422564	2.32505	23.0654	CREBZF*,CASZ1,AKNA,ZBTB21,HNRNPU,HOXC11,HOXA11,MED17,SBNO2,CCND1*,SALL3,DDRGK1*,SOX9,MEN1,ZBTB17,FOXD2,ZHX3,ATP1B4*,SOX12,EVX2,ARID1A,ARID3C,MYT1*,SIRT1*,CTCFL,NCOR2,AEBP2*,KAT6A,SP4,SP3,ZNF316,HDGFL1*,HOXB7,ZNF653	8	0.24	CCND1: P24385_p_1_1, MYT1: Q01538_p_3_1, HDGFL1: Q5TGJ6_p_1_1, AEBP2: Q6ZN18_p_2_1, SIRT1: Q96EB6_p_1_1; Q96EB6_p_4_1, DDRGK1: Q96HY6_p_1_1, CREBZF: Q9NS37_p_2_1, ATP1B4: Q9UN42_p_1_1	GO:2001141	regulation of RNA biosynthetic process
AE	GO:0006355	regulation of transcription, DNA-templated (GO:0006355)	34/2244	6.92728e-05	0.0422564	2.28016	21.8381	CREBZF*,CASZ1,SRRT,ZBTB21,HOXC11,HOXA11,CCAR1,MED17,SBNO2,SALL3,SOX9,MEN1,ZBTB17,DAXX,FOXD2,ZHX3,ATP1B4*,SOX12,EVX2,ARID1A,ARID3C,MYT1*,SIRT1*,CTCFL,NCOR2,AEBP2*,KAT6A,SP4,SP3,ZNF316,ERCC6,HDGFL1*,HOXB7,ZNF653	6	0.18	MYT1: Q01538_p_3_1, HDGFL1: Q5TGJ6_p_1_1, AEBP2: Q6ZN18_p_2_1, SIRT1: Q96EB6_p_1_1; Q96EB6_p_4_1, CREBZF: Q9NS37_p_2_1, ATP1B4: Q9UN42_p_1_1	GO:2001141	regulation of RNA biosynthetic process
KR	GO:0006357	regulation of transcription by RNA polymerase II (GO:0006357)	48/2206	1.60254e-12	1.41437e-09	3.97562	107.976	SP100,LDB1,LIN37,FOXI3,EHMT2,SP140,CHD8,CTR9,LEF1,FOXI1,NKAP,MED19*,CHD5,RSF1,BAZ2B,LDB2,CHD3,HMGB4,NPAS3,DVL1,DVL3,CIR1,BRD7,NKX2-2,ZNF541,NKX2-8,TCF7L2,TCF7L1*,POU2F1,FOXH1,INO80,ZNF75D,FOXL1,RRP1B,SMARCA2*,JMJD6,VEGFA,NCOR2,ZNF639,PHIP*,GTF2IRD1,SP140L,BRWD1,LPIN1,ZNF653,LPIN2,LPIN3,VSX2	4	0.08	MED19: A0JLT2_p_2_1, SMARCA2: P51531_p_3_1; P51531_p_6_1, PHIP: Q8WWQ0_p_3_1, TCF7L1: Q9HCS4_p_4_1	GO:2001141	regulation of RNA biosynthetic process
KR	GO:0006355	regulation of transcription, DNA-templated (GO:0006355)	48/2244	2.98704e-12	1.41437e-09	3.89844	103.452	L3MBTL1,KDM5A,SETD5*,SP100,LDB1,FOXI3,SP140,CHD8,CTR9,LEF1,FOXI1,NKAP,CHD5,RSF1,BAZ2B,CHD3,HMGB4,NPAS3,DVL1,DVL3,PAK6,CIR1,BRD7,NKX2-2,ZNF541,NKX2-8,TCF7L2,TCF7L1*,POU2F1,SFMBT1,SFMBT2,FOXH1,ZNF75D,FOXL1,SMARCA2*,JMJD6,VEGFA,NCOR2,GON4L,MYBBP1A,ZNF639,PHIP*,GTF2IRD1,SP140L,BRWD1,ZNF653,VSX1,VSX2	4	0.08	SMARCA2: P51531_p_3_1; P51531_p_6_1, PHIP: Q8WWQ0_p_3_1, SETD5: Q9C0A6_p_2_1, TCF7L1: Q9HCS4_p_4_1	GO:2001141	regulation of RNA biosynthetic process
KR	GO:0045892	negative regulation of transcription, DNA-templated (GO:0045892)	26/948	5.81955e-09	1.83704e-06	4.41195	83.6596	L3MBTL1,SP100,LDB1,LIN37,EHMT2,CHD8,CTR9,LEF1,NKAP,RSF1,LDB2,CHD3,CIR1,BRD7,ZNF541,TCF7L2,POU2F1,SFMBT1,SFMBT2,SMARCA2*,VEGFA,NCOR2,MYBBP1A,ZNF639,GTF2IRD1,VSX2	1	0.04	SMARCA2: P51531_p_3_1; P51531_p_6_1	GO:2001141	regulation of RNA biosynthetic process
KR	GO:1903507	negative regulation of nucleic acid-templated transcription (GO:1903507)	18/464	9.44793e-09	2.2368e-06	6.07164	112.189	L3MBTL1,TCF7L2,POU2F1,LDB1,SFMBT1,SFMBT2,CHD8,LEF1,NKAP,RSF1,SMARCA2*,NCOR2,MYBBP1A,ZNF639,CIR1,BRD7,ZNF653,ZNF541	1	0.06	SMARCA2: P51531_p_3_1; P51531_p_6_1	GO:1903507	negative regulation of nucleic acid-templated transcription
KR	GO:0045893	positive regulation of transcription, DNA-templated (GO:0045893)	27/1183	1.28872e-07	2.44083e-05	3.63912	57.7327	KDM5A,SP100,LDB1,CHD8,LEF1,FOXI1,MED19*,RSF1,LDB2,NPAS3,DVL1,DVL3,BRD7,NKX2-8,TCF7L2,POU2F1,FOXH1,INO80,RRP1B,SMARCA2*,JMJD6,VEGFA,ZNF639,PHIP*,LPIN1,LPIN2,LPIN3	3	0.11	MED19: A0JLT2_p_2_1, SMARCA2: P51531_p_3_1; P51531_p_6_1, PHIP: Q8WWQ0_p_3_1	GO:2001141	regulation of RNA biosynthetic process
KR	GO:0045944	positive regulation of transcription by RNA polymerase II (GO:0045944)	23/908	2.0539e-07	3.24174e-05	3.97543	61.2151	NKX2-8,TCF7L2,POU2F1,LDB1,CHD8,FOXH1,LEF1,FOXI1,MED19*,RSF1,INO80,LDB2,RRP1B,SMARCA2*,JMJD6,VEGFA,ZNF639,DVL1,DVL3,PHIP*,LPIN1,LPIN2,LPIN3	3	0.13	MED19: A0JLT2_p_2_1, SMARCA2: P51531_p_3_1; P51531_p_6_1, PHIP: Q8WWQ0_p_3_1	GO:2001141	regulation of RNA biosynthetic process
KR	GO:2000113	negative regulation of cellular macromolecule biosynthetic process (GO:2000113)	17/547	5.88034e-07	7.95526e-05	4.76765	68.399	L3MBTL1,TCF7L2,POU2F1,LDB1,SFMBT1,SFMBT2,CHD8,LEF1,NKAP,RSF1,SMARCA2*,NCOR2,MYBBP1A,ZNF639,CIR1,BRD7,ZNF541	1	0.06	SMARCA2: P51531_p_3_1; P51531_p_6_1	GO:2001141	regulation of RNA biosynthetic process
KR	GO:0006325	chromatin organization (GO:0006325)	9/142	1.06621e-06	0.000126213	9.66983	132.974	L3MBTL1,KDM5A,SETD5*,TCF7L1*,RSF1,BAZ2B,INO80,BRWD1,SMARCA2*	3	0.33	SMARCA2: P51531_p_3_1; P51531_p_6_1, SETD5: Q9C0A6_p_2_1, TCF7L1: Q9HCS4_p_4_1	GO:0006325	chromatin organization
KR	GO:2000112	regulation of cellular macromolecule biosynthetic process (GO:2000112)	14/468	9.49696e-06	0.000999292	4.4978	52.015	ANKRD17*,TCF7L1*,LDB1,EHMT2,CTR9,PDGFA,CHD3,SMARCA2*,GON4L,MYBBP1A,DVL1,PAK6,GTF2IRD1,VSX1	3	0.21	ANKRD17: O75179_p_6_1, SMARCA2: P51531_p_3_1; P51531_p_6_1, TCF7L1: Q9HCS4_p_4_1	GO:2001141	regulation of RNA biosynthetic process
KR	GO:0006338	chromatin remodeling (GO:0006338)	7/103	1.10378e-05	0.00104528	10.2901	117.453	KDM5A,CHD8,RSF1,BAZ2B,INO80,CHD3,SMARCA2*	1	0.14	SMARCA2: P51531_p_3_1; P51531_p_6_1	GO:0006325	chromatin organization
KR	GO:0019228	neuronal action potential (GO:0019228)	4/22	1.84852e-05	0.00152434	30.8236	335.932	SCN8A,SCN2A,SCN3A,SCN1A*	1	0.25	SCN1A: P35498_p_4_1	GO:0001508	action potential
KR	GO:0001508	action potential (GO:0001508)	5/45	1.93158e-05	0.00152434	17.441	189.315	SCN8A,SLC4A3,SCN2A,SCN3A,SCN1A*	1	0.2	SCN1A: P35498_p_4_1	GO:0001508	action potential
KR	GO:0086010	membrane depolarization during action potential (GO:0086010)	4/26	3.69255e-05	0.00268988	25.2142	257.352	SCN8A,SCN2A,SCN3A,SCN1A*	1	0.25	SCN1A: P35498_p_4_1	GO:0086010	membrane depolarization during action potential
KR	GO:0000122	negative regulation of transcription by RNA polymerase II (GO:0000122)	16/684	4.47273e-05	0.00302548	3.50779	35.1303	TCF7L2,SP100,LDB1,LIN37,EHMT2,CHD8,CTR9,NKAP,LDB2,CHD3,SMARCA2*,VEGFA,NCOR2,CIR1,GTF2IRD1,VSX2	1	0.06	SMARCA2: P51531_p_3_1; P51531_p_6_1	GO:2001141	regulation of RNA biosynthetic process
KR	GO:0043392	negative regulation of DNA binding (GO:0043392)	4/31	7.55296e-05	0.00476843	20.5398	194.943	SP100,SMO*,LEF1,RSF1	1	0.25	SMO: Q99835_p_2_1	GO:0051100	negative regulation of binding
KR	GO:1903506	regulation of nucleic acid-templated transcription (GO:1903506)	12/430	8.21113e-05	0.00478115	4.13291	38.8801	TCF7L1*,GON4L,LDB1,MYBBP1A,CTR9,DVL1,PAK6,GTF2IRD1,CHD3,SMARCA2*,ZNF653,VSX1	2	0.17	SMARCA2: P51531_p_3_1; P51531_p_6_1, TCF7L1: Q9HCS4_p_4_1	GO:1903506	regulation of nucleic acid-templated transcription
KR	GO:0051899	membrane depolarization (GO:0051899)	4/32	8.58285e-05	0.00478115	19.8052	185.439	SCN8A,SCN2A,SCN3A,SCN1A*	1	0.25	SCN1A: P35498_p_4_1	GO:0051899	membrane depolarization
KR	GO:0010468	regulation of gene expression (GO:0010468)	20/1079	0.000126227	0.00664096	2.79479	25.09	USP36,SRRM4,TCF7L1*,LDB1,SFMBT2,CTR9,LEF1,NKAP,ZNF804A,CHD3,RRP1B,SMARCA2*,VEGFA,GON4L,SMO*,MYBBP1A,DVL1,PAK6,GTF2IRD1,VSX1	3	0.15	SMARCA2: P51531_p_3_1; P51531_p_6_1, SMO: Q99835_p_2_1, TCF7L1: Q9HCS4_p_4_1	GO:0010468	regulation of gene expression
KR	GO:0060070	canonical Wnt signaling pathway (GO:0060070)	5/68	0.000143909	0.00717274	11.0608	97.8475	TCF7L2,TCF7L1*,LEF1,DVL1,DVL3	1	0.2	TCF7L1: Q9HCS4_p_4_1	GO:0007165	signal transduction
KR	GO:0006646	phosphatidylethanolamine biosynthetic process (GO:0006646)	3/15	0.000165896	0.00785518	34.4462	299.825	LPIN1,LPIN2,LPIN3	0	0		GO:0046337	phosphatidylethanolamine metabolic process
KR	GO:0016072	rRNA metabolic process (GO:0016072)	7/162	0.000198052	0.00874175	6.35419	54.1821	RPL41*,NIFK,EXOSC9,RRP1,WDR74,NOL8*,RRP1B	2	0.29	RPL41: P62945_p_1_1, NOL8: Q76FK4_p_4_1	GO:0016072	rRNA metabolic process
KR	GO:0043923	positive regulation by host of viral transcription (GO:0043923)	3/16	0.000203082	0.00874175	31.7949	270.317	ZNF639,LEF1,RRP1B	0	0		GO:0051851	modification by host of symbiont morphology or physiology
KR	GO:0043044	ATP-dependent chromatin remodeling (GO:0043044)	4/42	0.000252354	0.0103904	14.5859	120.84	CHD8,CHD3,INO80,SMARCA2*	1	0.25	SMARCA2: P51531_p_3_1; P51531_p_6_1	GO:0006325	chromatin organization
KR	GO:0019432	triglyceride biosynthetic process (GO:0019432)	3/18	0.000292746	0.0115513	27.5528	224.175	LPIN1,LPIN2,LPIN3	0	0		GO:0046463	acylglycerol biosynthetic process
KR	GO:0051101	regulation of DNA binding (GO:0051101)	4/47	0.000390857	0.0146555	12.8866	101.124	SP100,SMO*,LEF1,RSF1	1	0.25	SMO: Q99835_p_2_1	GO:0051101	regulation of DNA binding
KR	GO:1903508	positive regulation of nucleic acid-templated transcription (GO:1903508)	12/511	0.000402369	0.0146555	3.44761	26.9539	KDM5A,SP100,CHD8,FOXH1,LEF1,DVL3,PHIP*,RSF1,BRD7,SMARCA2*,JMJD6,NPAS3	2	0.17	SMARCA2: P51531_p_3_1; P51531_p_6_1, PHIP: Q8WWQ0_p_3_1	GO:1903506	regulation of nucleic acid-templated transcription
KR	GO:0051100	negative regulation of binding (GO:0051100)	5/88	0.000480865	0.0168659	8.38707	64.0766	SP100,SMO*,LEF1,DVL1,RSF1	1	0.2	SMO: Q99835_p_2_1	GO:0051100	negative regulation of binding
KR	GO:0003140	determination of left/right asymmetry in lateral mesoderm (GO:0003140)	2/5	0.000528823	0.0178856	91.2644	688.577	SMO*,FOXH1	1	0.5	SMO: Q99835_p_2_1	GO:0003140	determination of left/right asymmetry in lateral mesoderm
KR	GO:0042254	ribosome biogenesis (GO:0042254)	7/192	0.000553491	0.0180743	5.31568	39.8637	RPL41*,EXOSC9,RRP1,WDR74,SURF6*,NOL8*,RRP1B	3	0.43	SURF6: O75683_p_1_1; O75683_p_2_1, RPL41: P62945_p_1_1, NOL8: Q76FK4_p_4_1	GO:0042254	ribosome biogenesis
KR	GO:0016055	Wnt signaling pathway (GO:0016055)	5/92	0.000589629	0.0186126	7.99984	59.4869	TCF7L2,TCF7L1*,LEF1,DVL1,DVL3	1	0.2	TCF7L1: Q9HCS4_p_4_1	GO:0007165	signal transduction
KR	GO:0046463	acylglycerol biosynthetic process (GO:0046463)	3/23	0.000618483	0.0188937	20.6594	152.636	LPIN1,LPIN2,LPIN3	0	0		GO:0046463	acylglycerol biosynthetic process
KR	GO:0034470	ncRNA processing (GO:0034470)	7/201	0.000725818	0.0214797	5.06675	36.6236	RPL41*,POP1,EXOSC9,RRP1,WDR74,NOL8*,RRP1B	2	0.29	RPL41: P62945_p_1_1, NOL8: Q76FK4_p_4_1	GO:0006396	RNA processing
KR	GO:0044242	cellular lipid catabolic process (GO:0044242)	3/27	0.000999759	0.0278462	17.2127	118.905	LPIN1,LPIN2,LPIN3	0	0		GO:0044242	cellular lipid catabolic process
KR	GO:0072329	monocarboxylic acid catabolic process (GO:0072329)	3/27	0.000999759	0.0278462	17.2127	118.905	LPIN1,LPIN2,LPIN3	0	0		GO:0072329	monocarboxylic acid catabolic process
KR	GO:1901796	regulation of signal transduction by p53 class mediator (GO:1901796)	6/156	0.00104725	0.0283357	5.5895	38.3528	L3MBTL1,EHMT2,CHD5,CHD3,SSRP1,BRD7	0	0		GO:0023051	regulation of signaling
KR	GO:1901725	regulation of histone deacetylase activity (GO:1901725)	2/7	0.00109984	0.0286503	54.7531	373.01	KDM5A,VEGFA	0	0		GO:1901725	regulation of histone deacetylase activity
KR	GO:0051276	chromosome organization (GO:0051276)	5/106	0.00111939	0.0286503	6.88607	46.7906	L3MBTL1,TCF7L2,TCF7L1*,LDB1,BRWD1	1	0.2	TCF7L1: Q9HCS4_p_4_1	GO:0051276	chromosome organization
KR	GO:1904837	beta-catenin-TCF complex assembly (GO:1904837)	3/29	0.00123558	0.0307921	15.887	106.383	TCF7L2,TCF7L1*,LEF1	1	0.33	TCF7L1: Q9HCS4_p_4_1	GO:1904837	beta-catenin-TCF complex assembly
KR	GO:0050801	ion homeostasis (GO:0050801)	3/30	0.00136552	0.0331577	15.2978	100.908	AP3D1*,SLC4A3,SLC4A5*	2	0.67	AP3D1: O14617_p_1_1, SLC4A5: Q9BY07_p_2_1	GO:0050801	ion homeostasis
KR	GO:0071679	commissural neuron axon guidance (GO:0071679)	2/8	0.00145939	0.0337084	45.6253	297.921	SMO*,VEGFA	1	0.5	SMO: Q99835_p_2_1	GO:0071679	commissural neuron axon guidance
KR	GO:0150012	positive regulation of neuron projection arborization (GO:0150012)	2/8	0.00145939	0.0337084	45.6253	297.921	DVL1,DVL3	0	0		GO:0150012	positive regulation of neuron projection arborization
KR	GO:0046337	phosphatidylethanolamine metabolic process (GO:0046337)	3/31	0.00150374	0.0339057	14.7507	95.8769	LPIN1,LPIN2,LPIN3	0	0		GO:0046337	phosphatidylethanolamine metabolic process
KR	GO:0051851	modulation by host of symbiont process (GO:0051851)	3/32	0.00165042	0.0363475	14.2414	91.2406	ZNF639,LEF1,RRP1B	0	0		GO:0051851	modification by host of symbiont morphology or physiology
KR	GO:0006364	rRNA processing (GO:0006364)	6/173	0.00177708	0.038001	5.01618	31.7664	RPL41*,EXOSC9,RRP1,WDR74,NOL8*,RRP1B	2	0.33	RPL41: P62945_p_1_1, NOL8: Q76FK4_p_4_1	GO:0006396	RNA processing
KR	GO:0006656	phosphatidylcholine biosynthetic process (GO:0006656)	3/33	0.00180575	0.038001	13.766	86.9566	LPIN1,LPIN2,LPIN3	0	0		GO:0006656	phosphatidylcholine biosynthetic process
KR	GO:2000045	regulation of G1/S transition of mitotic cell cycle (GO:2000045)	4/71	0.00185819	0.0382546	8.26052	51.9434	ANKRD17*,LSM11,INO80,BRD7	1	0.25	ANKRD17: O75179_p_6_1	GO:2000045	regulation of G1/S transition of mitotic cell cycle
AK	GO:0051225	spindle assembly (GO:0051225)	14/84	5.16458e-20	2.42219e-17	67.3119	2989.31	GOLGA8R*,GOLGA8T*,GOLGA8J*,GOLGA8M*,GOLGA8O*,GOLGA8N*,GOLGA8Q*,GOLGA2*,GOLGA6A*,GOLGA8B*,GOLGA6C*,GOLGA6B*,GOLGA6D*,GOLGA8H*	14	1	GOLGA8O: A6NCC3_p_1_1, GOLGA6C: A6NDK9_p_1_1, GOLGA6B: A6NDN3_p_1_1, GOLGA8J: A6NMD2_p_1_1, GOLGA8B: A8MQT2_p_1_1, GOLGA8N: F8WBI6_p_1_1, GOLGA8T: H3BQL2_p_1_1, GOLGA8M: H3BSY2_p_1_1, GOLGA8Q: H3BV12_p_1_1, GOLGA8R: I6L899_p_1_1, GOLGA6D: P0CG33_p_1_1, GOLGA8H: P0CJ92_p_1_1, GOLGA2: Q08379_p_1_1, GOLGA6A: Q9NYA3_p_1_1	GO:0006996	organelle organization
AK	GO:0007030	Golgi organization (GO:0007030)	14/130	3.13304e-17	7.34697e-15	40.5251	1540.03	GOLGA8R*,GOLGA8T*,GOLGA8J*,GOLGA8M*,GOLGA8O*,GOLGA8N*,GOLGA8Q*,GOLGA2*,GOLGA6A*,GOLGA8B*,GOLGA6C*,GOLGA6B*,GOLGA6D*,GOLGA8H*	14	1	GOLGA8O: A6NCC3_p_1_1, GOLGA6C: A6NDK9_p_1_1, GOLGA6B: A6NDN3_p_1_1, GOLGA8J: A6NMD2_p_1_1, GOLGA8B: A8MQT2_p_1_1, GOLGA8N: F8WBI6_p_1_1, GOLGA8T: H3BQL2_p_1_1, GOLGA8M: H3BSY2_p_1_1, GOLGA8Q: H3BV12_p_1_1, GOLGA8R: I6L899_p_1_1, GOLGA6D: P0CG33_p_1_1, GOLGA8H: P0CJ92_p_1_1, GOLGA2: Q08379_p_1_1, GOLGA6A: Q9NYA3_p_1_1	GO:0006996	organelle organization
AK	GO:0010256	endomembrane system organization (GO:0010256)	14/199	1.29882e-14	2.03048e-12	25.3219	809.66	GOLGA8R*,GOLGA8T*,GOLGA8J*,GOLGA8M*,GOLGA8O*,GOLGA8N*,GOLGA8Q*,GOLGA2*,GOLGA6A*,GOLGA8B*,GOLGA6C*,GOLGA6B*,GOLGA6D*,GOLGA8H*	14	1	GOLGA8O: A6NCC3_p_1_1, GOLGA6C: A6NDK9_p_1_1, GOLGA6B: A6NDN3_p_1_1, GOLGA8J: A6NMD2_p_1_1, GOLGA8B: A8MQT2_p_1_1, GOLGA8N: F8WBI6_p_1_1, GOLGA8T: H3BQL2_p_1_1, GOLGA8M: H3BSY2_p_1_1, GOLGA8Q: H3BV12_p_1_1, GOLGA8R: I6L899_p_1_1, GOLGA6D: P0CG33_p_1_1, GOLGA8H: P0CJ92_p_1_1, GOLGA2: Q08379_p_1_1, GOLGA6A: Q9NYA3_p_1_1	GO:0010256	endomembrane system organization
AK	GO:0070925	organelle assembly (GO:0070925)	15/425	3.00561e-11	3.52407e-09	12.311	298.27	GOLGA8R*,GOLGA8T*,GOLGA8J*,GOLGA8M*,GOLGA8O*,GOLGA8N*,GOLGA8Q*,GOLGA2*,GOLGA6A*,GOLGA8B*,GOLGA6C*,GOLGA6B*,GOLGA6D*,GOLGA8H*,EIF2A*	15	1	GOLGA8O: A6NCC3_p_1_1, GOLGA6C: A6NDK9_p_1_1, GOLGA6B: A6NDN3_p_1_1, GOLGA8J: A6NMD2_p_1_1, GOLGA8B: A8MQT2_p_1_1, GOLGA8N: F8WBI6_p_1_1, GOLGA8T: H3BQL2_p_1_1, GOLGA8M: H3BSY2_p_1_1, GOLGA8Q: H3BV12_p_1_1, GOLGA8R: I6L899_p_1_1, GOLGA6D: P0CG33_p_1_1, GOLGA8H: P0CJ92_p_1_1, GOLGA2: Q08379_p_1_1, EIF2A: Q9BY44_p_1_1, GOLGA6A: Q9NYA3_p_1_1	GO:0006996	organelle organization
AK	GO:0006996	organelle organization (GO:0006996)	14/420	3.13221e-10	2.93801e-08	11.4091	249.678	GOLGA8R*,GOLGA8T*,GOLGA8J*,GOLGA8M*,GOLGA8O*,GOLGA8N*,GOLGA8Q*,GOLGA2*,GOLGA6A*,GOLGA8B*,GOLGA6C*,GOLGA6B*,GOLGA6D*,GOLGA8H*	14	1	GOLGA8O: A6NCC3_p_1_1, GOLGA6C: A6NDK9_p_1_1, GOLGA6B: A6NDN3_p_1_1, GOLGA8J: A6NMD2_p_1_1, GOLGA8B: A8MQT2_p_1_1, GOLGA8N: F8WBI6_p_1_1, GOLGA8T: H3BQL2_p_1_1, GOLGA8M: H3BSY2_p_1_1, GOLGA8Q: H3BV12_p_1_1, GOLGA8R: I6L899_p_1_1, GOLGA6D: P0CG33_p_1_1, GOLGA8H: P0CJ92_p_1_1, GOLGA2: Q08379_p_1_1, GOLGA6A: Q9NYA3_p_1_1	GO:0006996	organelle organization
AK	GO:1905268	negative regulation of chromatin organization (GO:1905268)	5/13	7.08851e-10	4.15564e-08	183.079	3856.99	H1-5,H1-4,H1-10,H1-3,H1-2	0	0		GO:1905268	negative regulation of chromatin organization
AK	GO:0031936	negative regulation of chromatin silencing (GO:0031936)	5/13	7.08851e-10	4.15564e-08	183.079	3856.99	H1-5,H1-4,H1-10,H1-3,H1-2	0	0		GO:1905268	negative regulation of chromatin organization
AK	GO:0060969	negative regulation of gene silencing (GO:0060969)	5/13	7.08851e-10	4.15564e-08	183.079	3856.99	H1-5,H1-4,H1-10,H1-3,H1-2	0	0		GO:0060969	negative regulation of gene silencing
AK	GO:0016584	nucleosome positioning (GO:0016584)	5/15	1.64466e-09	8.57048e-08	146.449	2962.03	H1-5,H1-4,H1-10,H1-3,H1-2	0	0		GO:0006325	chromatin organization
AK	GO:0031935	regulation of chromatin silencing (GO:0031935)	5/16	2.38547e-09	1.11878e-07	133.128	2643.11	H1-5,H1-4,H1-10,H1-3,H1-2	0	0		GO:0010468	regulation of gene expression
AK	GO:0000018	regulation of DNA recombination (GO:0000018)	6/42	9.0635e-09	3.86435e-07	49.4801	916.322	H1-5,H1-4,KDM1A*,H1-10,H1-3,H1-2	1	0.17	KDM1A: O60341_p_1_1	GO:0000018	regulation of DNA recombination
AK	GO:0030261	chromosome condensation (GO:0030261)	6/45	1.3952e-08	5.45292e-07	45.667	826.009	H1-5,H1-4,INCENP*,H1-10,H1-3,H1-2	1	0.17	INCENP: Q9NQS7_p_4_1	GO:0051276	chromosome organization
AK	GO:0006323	DNA packaging (GO:0006323)	5/24	2.26925e-08	8.18676e-07	77.0433	1356.06	H1-5,H1-4,H1-10,H1-3,H1-2	0	0		GO:0051276	chromosome organization
AK	GO:0051053	negative regulation of DNA metabolic process (GO:0051053)	5/36	1.94546e-07	6.5173e-06	47.1917	729.233	H1-5,H1-4,H1-10,H1-3,H1-2	0	0		GO:0051053	negative regulation of DNA metabolic process
AK	GO:0010608	posttranscriptional regulation of gene expression (GO:0010608)	5/46	6.87622e-07	2.14997e-05	35.6636	506.067	TCOF1,NOLC1,MATR3,FOXO3,EIF2A*	1	0.2	EIF2A: Q9BY44_p_1_1	GO:0010468	regulation of gene expression
AK	GO:0045910	negative regulation of DNA recombination (GO:0045910)	5/57	2.036e-06	5.61696e-05	28.1038	368.287	H1-5,H1-4,H1-10,H1-3,H1-2	0	0		GO:0051053	negative regulation of DNA metabolic process
AK	GO:0045815	positive regulation of gene expression, epigenetic (GO:0045815)	5/57	2.036e-06	5.61696e-05	28.1038	368.287	H1-5,H1-4,H1-10,H1-3,H1-2	0	0		GO:0010468	regulation of gene expression
AK	GO:0034248	regulation of cellular amide metabolic process (GO:0034248)	4/32	5.43537e-06	0.000141622	41.1988	499.435	TCOF1,NOLC1,FOXO3,EIF2A*	1	0.25	EIF2A: Q9BY44_p_1_1	GO:0034248	regulation of cellular amide metabolic process
AK	GO:0042254	ribosome biogenesis (GO:0042254)	7/192	6.42618e-06	0.000158625	11.3181	135.309	NOP58,PES1*,BMS1*,NOLC1,RRP12,RPL29,EIF2A*	3	0.43	PES1: O00541_p_2_1, BMS1: Q14692_p_1_1, EIF2A: Q9BY44_p_1_1	GO:0042254	ribosome biogenesis
AK	GO:0031497	chromatin assembly (GO:0031497)	5/73	6.98032e-06	0.000163689	21.4738	254.946	H1-5,H1-4,H1-10,H1-3,H1-2	0	0		GO:0006325	chromatin organization
AK	GO:0034470	ncRNA processing (GO:0034470)	7/201	8.67154e-06	0.000193664	10.7881	125.74	SARS1*,NOP58,PES1*,BMS1*,NOLC1,RRP12,RPL29	3	0.43	PES1: O00541_p_2_1, SARS1: P49591_p_2_1, BMS1: Q14692_p_1_1	GO:0006396	RNA processing
AK	GO:0034728	nucleosome organization (GO:0034728)	5/94	2.40382e-05	0.00051245	16.3896	174.318	H1-5,H1-4,H1-10,H1-3,H1-2	0	0		GO:0006325	chromatin organization
AK	GO:0016072	rRNA metabolic process (GO:0016072)	6/162	2.79883e-05	0.000570717	11.3496	118.986	NOP58,PES1*,BMS1*,NOLC1,RRP12,RPL29	2	0.33	PES1: O00541_p_2_1, BMS1: Q14692_p_1_1	GO:0016072	rRNA metabolic process
AK	GO:0032268	regulation of cellular protein metabolic process (GO:0032268)	4/49	3.05594e-05	0.000597182	25.6129	266.267	TCOF1,NOLC1,FOXO3,EIF2A*	1	0.25	EIF2A: Q9BY44_p_1_1	GO:0032268	regulation of cellular protein metabolic process
AK	GO:0006364	rRNA processing (GO:0006364)	6/173	4.04651e-05	0.000759125	10.5961	107.181	NOP58,PES1*,BMS1*,NOLC1,RRP12,RPL29	2	0.33	PES1: O00541_p_2_1, BMS1: Q14692_p_1_1	GO:0006396	RNA processing
AK	GO:0006417	regulation of translation (GO:0006417)	5/178	0.000486143	0.00876928	8.39595	64.0528	TCOF1,NOLC1,FOXO3,GIGYF2*,EIF2A*	2	0.4	GIGYF2: Q6Y7W6_p_4_1, EIF2A: Q9BY44_p_1_1	GO:2001141	regulation of RNA biosynthetic process
AK	GO:0051570	regulation of histone H3-K9 methylation (GO:0051570)	2/12	0.000846976	0.0147123	56.1042	396.872	H1-5,KDM1A*	1	0.5	KDM1A: O60341_p_1_1	GO:0032268	regulation of cellular protein metabolic process
AK	GO:0045893	positive regulation of transcription, DNA-templated (GO:0045893)	12/1183	0.00111702	0.0187101	3.1509	21.4169	KDM6B,H1-5,H1-4,BRPF1*,KDM1A*,GTF2F1,FOXO3,H1-10,FOXO1,H1-3,HMGN1,H1-2	2	0.17	KDM1A: O60341_p_1_1, BRPF1: P55201_p_4_1	GO:2001141	regulation of RNA biosynthetic process
AK	GO:0048864	stem cell development (GO:0048864)	2/17	0.0017248	0.0278941	37.3934	237.921	TCOF1,NOLC1	0	0		GO:0048468	cell development
AK	GO:0070542	response to fatty acid (GO:0070542)	2/19	0.00215847	0.0316351	32.9909	202.51	FOXO3,FOXO1	0	0		GO:0070542	response to fatty acid
AK	GO:0014033	neural crest cell differentiation (GO:0014033)	2/19	0.00215847	0.0316351	32.9909	202.51	TCOF1,NOLC1	0	0		GO:0030154	cell differentiation
AK	GO:0014031	mesenchymal cell development (GO:0014031)	2/19	0.00215847	0.0316351	32.9909	202.51	TCOF1,NOLC1	0	0		GO:0030154	cell differentiation
AK	GO:0032091	negative regulation of protein binding (GO:0032091)	3/74	0.0025116	0.0356951	11.9855	71.7553	GOLGA2*,KDM1A*,GTF2F1	2	0.67	KDM1A: O60341_p_1_1, GOLGA2: Q08379_p_1_1	GO:0048468	cell development
ES	GO:0034470	ncRNA processing (GO:0034470)	12/201	1.55861e-05	0.0109963	4.92492	54.5146	DKC1,RPLP1,BMS1,RPLP0,SRRT,DHX37,NOLC1,RPLP2,NOL8,DROSHA,UTP14A,WDR43	0	0		GO:0006396	RNA processing
ES	GO:0006364	rRNA processing (GO:0006364)	11/173	1.96817e-05	0.0109963	5.25335	56.9244	DKC1,RPLP1,BMS1,RPLP0,MAK16,DHX37,NOLC1,RPLP2,NOL8,UTP14A,WDR43	0	0		GO:0006396	RNA processing
ES	GO:0016310	phosphorylation (GO:0016310)	17/400	2.53371e-05	0.0109963	3.47778	36.8061	BRD2*,CDK11A,NRK,MINK1,EIF2AK2,CDK11B,TTBK1,CDC25B,STK25,RARA,BMP2K,NEK1,TNIK,MAP3K13,MAP4K4,DGKH,MAP3K12	1	0.06	BRD2: P25440_p_8_1	GO:0016310	phosphorylation
ES	GO:0042254	ribosome biogenesis (GO:0042254)	11/192	5.13584e-05	0.0124635	4.69733	46.3941	DKC1,RPLP1,BMS1,RPLP0,DHX37,NOLC1,RPLP2,NOL8,NOC2L,UTP14A,WDR43	0	0		GO:0042254	ribosome biogenesis
ES	GO:0016072	rRNA metabolic process (GO:0016072)	10/162	6.03508e-05	0.0124635	5.07252	49.2813	DKC1,RPLP1,BMS1,RPLP0,DHX37,NOLC1,RPLP2,NOL8,UTP14A,WDR43	0	0		GO:0016072	rRNA metabolic process
ES	GO:0006355	regulation of transcription, DNA-templated (GO:0006355)	51/2244	7.27561e-05	0.0124635	1.91538	18.2505	ATF1,THRA,BNC2,ARID4A*,SIX1,RSF1,ARID4B,AATF,CHD2,CHD1,EDRF1,CIR1,BRD3,BRD2*,ZFP91,ETV3,BRMS1,ZSCAN20,KAT6B,KAT6A,RARA,ZNF438,PGR,HDGFL2,HMX2,KDM7A,L3MBTL1,ASCL5,SP100,ZBTB47,MAX,SRRT,ZBTB42,MBTD1,GSC*,TP53BP1,TRIM44,BRD4,CREBBP,CDK11A,ZFHX2,KDM4C,HMGA1,SMARCA2,CDK11B,MYBBP1A,BCL6B,BRWD1,ZNF652,BRDT,MAP3K12	3	0.06	BRD2: P25440_p_8_1, ARID4A: P29374_p_1_1, GSC: P56915_p_1_1	GO:2001141	regulation of RNA biosynthetic process
ES	GO:1902531	regulation of intracellular signal transduction (GO:1902531)	17/437	7.60614e-05	0.0124635	3.16534	30.02	L3MBTL1,RALBP1,PHLPP1,PLEKHG2,ARHGEF12,CARD8,NRK,PLEKHG5,ARHGEF17,MINK1,NOC2L,ARHGAP44,ARHGAP33,FLCN*,KAT6A,TNIK,MAP4K4	1	0.06	FLCN: Q8NFG4_p_2_1	GO:0023051	regulation of signaling
ES	GO:0000398	mRNA splicing, via spliceosome (GO:0000398)	13/274	7.65804e-05	0.0124635	3.86462	36.6256	SF3A3,SF3B2,PRPF38A*,SRRT,RBM19,PRPF40B,RNPC3,GTF2F1,COIL,RNF113A,MFAP1,CWC22,DHX16	1	0.08	PRPF38A: Q8NAV1_p_1_1	GO:0006396	RNA processing
ES	GO:0006325	chromatin organization (GO:0006325)	9/142	0.000115142	0.0166573	5.20203	47.179	L3MBTL1,HIRIP3,KDM4C,RSF1,BRWD1,NPM3,SMARCA2,CHD1,BRDT	0	0		GO:0006325	chromatin organization
ES	GO:0000377	RNA splicing, via transesterification reactions with bulged adenosine as nucleophile (GO:0000377)	12/251	0.000134208	0.0174739	3.88464	34.6359	SF3A3,SF3B2,RNF113A,PRPF38A*,MFAP1,SRRT,CWC22,RBM19,DHX16,PRPF40B,RNPC3,GTF2F1	1	0.08	PRPF38A: Q8NAV1_p_1_1	GO:0006396	RNA processing
ES	GO:0006357	regulation of transcription by RNA polymerase II (GO:0006357)	49/2206	0.00018074	0.0204658	1.85738	16.0078	ATF1,THRA,ATN1,ARID4A*,SIX1,RSF1,ARID4B,NOC2L,AATF,CHD2,CHD1,FLCN*,CIR1,BRD3,BRD2*,ZFP91,GTF2F1,ETV3,BRMS1,ZSCAN20,KAT6B,KAT6A,RARA,ZNF438,PGR,HDGFL2,HMX2,KDM7A,ASCL5,CSF1R,SP100,CTDP1,ZBTB47,MAX,ZBTB42,GSC*,TP53BP1,BRD4,CREBBP,ZFHX2,KDM4C,CBX2,HMGA1,SMARCA2,BCL6B,KANSL3,BRWD1,ZNF652,TNRC6A	4	0.08	BRD2: P25440_p_8_1, ARID4A: P29374_p_1_1, GSC: P56915_p_1_1, FLCN: Q8NFG4_p_2_1	GO:2001141	regulation of RNA biosynthetic process
ES	GO:0006397	mRNA processing (GO:0006397)	13/300	0.000188625	0.0204658	3.50982	30.0994	SF3A3,SF3B2,PRPF38A*,SRRT,RBM19,PRPF40B,RNPC3,GTF2F1,RNF113A,SON,MFAP1,CWC22,DHX16	1	0.08	PRPF38A: Q8NAV1_p_1_1	GO:0006396	RNA processing
ES	GO:0006468	protein phosphorylation (GO:0006468)	17/496	0.000340543	0.0322616	2.76697	22.0942	BRD2*,CSF1R,CDK11A,NRK,MINK1,EIF2AK2,CDK11B,TTBK1,CDC25B,STK25,RARA,BMP2K,NEK1,TNIK,MAP3K13,MAP4K4,MAP3K12	1	0.06	BRD2: P25440_p_8_1	GO:0016310	phosphorylation
ES	GO:0032968	positive regulation of transcription elongation from RNA polymerase II promoter (GO:0032968)	3/11	0.000346899	0.0322616	28.3448	225.808	BTBD18,EAPP,BRD4	0	0		GO:2001141	regulation of RNA biosynthetic process
ES	GO:0034243	regulation of transcription elongation from RNA polymerase II promoter (GO:0034243)	4/27	0.000410009	0.0355888	13.186	102.842	BTBD18,EAPP,WDR43,BRD4	0	0		GO:2001141	regulation of RNA biosynthetic process
ES	GO:0051056	regulation of small GTPase mediated signal transduction (GO:0051056)	8/141	0.000579195	0.047132	4.60597	34.3323	ARHGAP44,ARHGAP33,FLCN*,RALBP1,ARHGEF12,PLEKHG2,ARHGEF17,PLEKHG5	1	0.12	FLCN: Q8NFG4_p_2_1	GO:0023051	regulation of signaling

## Sheet: MF
poly type	GO id	GO term	Overlap	p-value	adj p-value	odds ratio	combined score	enriched genes	count genes helix	fraction genes helix	enriched genes helix
ER	GO:0003723	RNA binding (GO:0003723)	38/1406	1.17273e-12	1.70047e-10	4.71075	129.412	TCERG1*,DIDO1,VCP*,RBM25*,YTHDC1*,DDX23*,NOL7*,GIGYF2*,CCAR1*,RBM15B,FIP1L1*,SNRNP70*,CWC22,SAFB2*,DHX15*,LUC7L*,ZC3H18*,DHX38*,DROSHA,NLRP1,ZC3H13*,RBM5,PNISR,EIF5B*,SCAF11,UPF3B*,PDAP1*,SAFB*,PRRC2B*,U2SURP*,PRRC2A*,NOA1*,LUC7L3*,ACIN1*,PPIG*,SREK1*,LUC7L2*,EIF3A*	30	0.79	TCERG1: O14776_p_6_1, U2SURP: O15042_p_4_1, DHX15: O43143_p_2_1, EIF5B: O60841_p_4_1, LUC7L3: O95232_p_1_1; O95232_p_2_1; O95232_p_3_1, SNRNP70: P08621_p_3_1; P08621_p_4_1; P08621_p_8_1; P08621_p_9_1, PRRC2A: P48634_p_1_1, RBM25: P49756_p_3_1; P49756_p_4_1; P49756_p_8_1, VCP: P55072_p_1_1, PPIG: Q13427_p_5_1, PDAP1: Q13442_p_2_1, SAFB2: Q14151_p_2_1, EIF3A: Q14152_p_4_1; Q14152_p_5_1, SAFB: Q1542…
ER	GO:0003729	mRNA binding (GO:0003729)	10/263	2.55131e-05	0.0018497	5.65477	59.8066	RNF20*,RBM25*,YTHDC1*,SNRNP70*,LUC7L*,UPF3B*,LUC7L3*,RBM5,LUC7L2*,EIF3A*	9	0.9	LUC7L3: O95232_p_1_1; O95232_p_2_1; O95232_p_3_1, SNRNP70: P08621_p_3_1; P08621_p_4_1; P08621_p_8_1; P08621_p_9_1, RBM25: P49756_p_3_1; P49756_p_4_1; P49756_p_8_1, EIF3A: Q14152_p_4_1; Q14152_p_5_1, RNF20: Q5VTR2_p_2_1; Q5VTR2_p_3_1, YTHDC1: Q96MU7_p_2_1, UPF3B: Q9BZI7_p_2_1; Q9BZI7_p_3_1; Q9BZI7_p_4_1; Q9BZI7_p_5_1, LUC7L: Q9NQ29_p_1_1, LUC7L2: Q9Y383_p_1_1
ER	GO:0030156	benzodiazepine receptor binding (GO:0030156)	2/5	0.000528823	0.0255598	91.2644	688.577	RIMBP3C,RIMBP3B	0	0
EK	GO:0003723	RNA binding (GO:0003723)	59/1406	1.13195e-17	2.52425e-15	4.43112	172.903	RBM25,SLC4A1AP,CCDC124*,NKAP,HMGB1*,CHD3,SPOUT1*,LARP1B,MECP2,PNN,RBMX2,DHX15*,MYO18A,DENR,UTP14A,RBM5,EIF5B,HSP90AA1*,DDX59*,PRPF40A,THOC2*,GTF2F1,SRRM1,ZNF638,CANX,PPIG*,SREK1*,SF3B2,SRRT,WBP4,NOLC1,RPS27L*,DDX21,RRBP1*,RTF1*,HSP90B1,RAD51AP1,TCOF1,PUF60,BMS1*,SAFB2,ZC3H18,RBBP6,RBM10,SRSF11,LARP7,MSN*,DEK*,SSRP1*,ANKHD1*,U2SURP,AIMP1,DIAPH1,EIF5,SON,EPRS1,LAS1L,ESF1*,TNRC6A*	19	0.32	DHX15: O43143_p_3_1, HSP90AA1: P07900_p_1_1, HMGB1: P09429_p_1_1, MSN: P26038_p_1_1, DEK: P35659_p_2_1, SSRP1: Q08945_p_3_1, PPIG: Q13427_p_1_1, BMS1: Q14692_p_6_1, DDX59: Q5T1V6_p_1_1, SPOUT1: Q5T280_p_1_1, RPS27L: Q71UM5_p_1_1, ANKHD1: Q8IWZ3_p_3_1, TNRC6A: Q8NDV7_p_1_1, THOC2: Q8NI27_p_2_1, SREK1: Q8WXA9_p_2_1, RTF1: Q92541_p_5_1, CCDC124: Q96CT7_p_2_1, ESF1: Q9H501_p_2_1, RRBP1: Q9P2E9_p_1_1
EK	GO:0140033	acetylation-dependent protein binding (GO:0140033)	4/21	0.000104743	0.0077859	19.5999	179.614	BRD3,BRD2,BRD4,BRDT	0	0
EK	GO:0070577	lysine-acetylated histone binding (GO:0070577)	4/21	0.000104743	0.0077859	19.5999	179.614	BRD3,BRD2,BRD4,BRDT	0	0
EK	GO:0003677	DNA binding (GO:0003677)	21/811	0.000854107	0.0384293	2.292	16.194	TCF7L2,SRRT,HP1BP3,ARID4A,RTF1*,INO80*,HMGB1*,CHD3,ZNF35,SMARCA1,MECP2,RAD51AP1,RYBP,SNAPC1,SP4,ZNF638,SAFB2,CLSPN,TCF3,HDGFL2*,RBM5	4	0.19	HMGB1: P09429_p_1_1, HDGFL2: Q7Z4V5_p_7_1, RTF1: Q92541_p_5_1, INO80: Q9ULG1_p_5_1
EK	GO:0005523	tropomyosin binding (GO:0005523)	3/16	0.000861644	0.0384293	19.1461	135.108	CALD1*,TNNT2*,LMOD1	2	0.67	TNNT2: P45379_p_4_1, CALD1: Q05682_p_3_1
EK	GO:0140603	ATP hydrolysis activity (GO:0140603)	4/45	0.00207967	0.0468492	8.11691	50.1264	HSP90AA1*,MYO18A,CHD3,ATP2B1*	2	0.5	HSP90AA1: P07900_p_1_1, ATP2B1: P20020_p_4_1; P20020_p_5_1
EK	GO:0008510	sodium:bicarbonate symporter activity (GO:0008510)	2/6	0.00210086	0.0468492	41.3285	254.807	SLC4A7*,SLC4A4	1	0.5	SLC4A7: Q9Y6M7_p_8_1
EK	GO:0140410	solute:bicarbonate symporter activity (GO:0140410)	2/6	0.00210086	0.0468492	41.3285	254.807	SLC4A7*,SLC4A4	1	0.5	SLC4A7: Q9Y6M7_p_8_1
EK	GO:0070087	chromo shadow domain binding (GO:0070087)	2/6	0.00210086	0.0468492	41.3285	254.807	SP100*,CHAF1A*	2	1	SP100: P23497_p_5_1, CHAF1A: Q13111_p_1_1; Q13111_p_2_1
EK	GO:0030628	pre-mRNA 3'-splice site binding (GO:0030628)	2/6	0.00210086	0.0468492	41.3285	254.807	ZRSR2*,SLU7*	2	1	SLU7: O95391_p_2_1, ZRSR2: Q15696_p_3_1
DE	GO:0003723	RNA binding (GO:0003723)	100/1406	7.53134e-20	2.83931e-17	3.21151	141.411	DBR1,BCCIP,NOC2L,VIRMA,CCAR1,YY1,EFTUD2,DHX57,PEG10,SNIP1*,ZNF326,SEC63,PNISR,NOM1,RPS9,NGDN,DDX10,DICER1,GTF2F1,PUS7,WBP11,PDIA4*,HNRNPUL1,HNRNPUL2*,NCL,GRWD1*,ANKRD17,ANP32A,NOP2,NOLC1,RTF1,SUPT6H,RTN4,TPR,ZC3H14,PPARGC1B,ZBED4,BTF3,SRPK2,ZRANB2,MTERF4,EIF2AK4,CWC15,SUPT5H,PRRC2B,ANKHD1,EIF5,LAS1L,MPHOSPH10,CALR*,SUGP2,SUGP1*,RBM27,DIDO1,RBM28,RBM25*,TUT7,RBM26,DDX46,CCDC47,HMGB2,DDX42,HMGB3*,H…	18	0.18	PES1: O00541_p_1_1, CHD2: O14647_p_6_1, HMGB3: O15347_p_2_1, EIF3D: O15371_p_1_1, AKAP8: O43823_p_2_1, HMGB1: P09429_p_2_1, PDIA4: P13667_p_1_1, CALR: P27797_p_2_1, DEK: P35659_p_1_1, RBM25: P49756_p_9_1, HNRNPUL2: Q1KMD3_p_2_1, PHF6: Q8IWS0_p_3_1, SUGP1: Q8IWZ8_p_1_1, PELP1: Q8IZL8_p_6_1, SNIP1: Q8TAD8_p_1_1, EIF3C: Q99613_p_5_1, GRWD1: Q9BQ67_p_1_1, UTP18: Q9Y5J1_p_5_1
DE	GO:0003677	DNA binding (GO:0003677)	61/811	2.49261e-13	4.69856e-11	3.22525	93.5975	APP,CSRNP3*,CHD8,HP1BP3,HMGB2,ARID4A*,HMGB3*,PRDM2,CHD4,ZBTB22,HMGB1*,CHD3,CHD2*,YY1,MECOM,HOXA7,POLE,FOXD4*,TIGD4,FOXD1,APLP2,SOX12,WBP11,MYCL,MYCN,KAT6A,ERF,TIMELESS,ZNF316,IRF6,HDGFL2,MCM2,HMX1,GTF3C1,GTF2A1,GTF3C3,GTF3C5,RTF1,SPTY2D1,FOXO3,ZBTB4,CENPB,NEUROD1,WRN,CDC45*,PRDM16,ZNF787,HIVEP2,CLSPN,ZBTB7A,MBD3,IRX2,DENND4A,ARID3A,DRAP1,ERCC3,CEBPZ,CALR*,TCF3,ERCC6,TAF1	8	0.13	CHD2: O14647_p_6_1, HMGB3: O15347_p_2_1, CDC45: O75419_p_2_1, HMGB1: P09429_p_2_1, CALR: P27797_p_2_1, ARID4A: P29374_p_2_1, FOXD4: Q12950_p_1_1, CSRNP3: Q8WYN3_p_1_1
DE	GO:0000977	RNA polymerase II transcription regulatory region sequence-specific DNA binding (GO:0000977)	66/1359	1.5864e-06	0.000199358	1.98646	26.5272	ZNF692*,PRDM4,MYT1*L,PRDM2,ZBTB22,CHD2*,CCAR1,YY1,MECOM,SALL2,ZNF526,BBX,HOXA7,ZNF367,MYBL1,PKNOX2,SOX5,FOXD4*,FOXD1,SOX11,SOX12,MYT1*,RBL2,MYCL,FOXD4*L5,TFDP1,FOXD4*L6,MYCN,TFDP2,IRF6,FOXD4*L3,FOXD4*L4,FOXD4*L1,ZSCAN29,HMX1,GTF2A1,HDAC5,CASZ1,ZBTB47,HDAC1,ARX,ZBTB45,FOXO3,ZBTB4,NEUROD1,NACC2,PRDM16,NACC1,HIVEP3,HIVEP2,ZBTB7B,NKX6-1,ZBTB7A,ZKSCAN1,ZBTB7C,IRX2,BCL11A*,DMRT2,IRX3,KLF1,ZBTB9,CREBRF,…	5	0.08	CHD2: O14647_p_6_1, MYT1: Q01538_p_2_1, FOXD4: Q12950_p_1_1, ZNF692: Q9BU19_p_2_1, BCL11A: Q9H165_p_3_1
DE	GO:0019888	protein phosphatase regulator activity (GO:0019888)	10/57	2.32763e-06	0.00021938	7.90041	102.474	PPP1R15A,IGBP1*,PPP1R2,SET,PPP4R2,PPP1R2B,PPP6R1,PPP1R1B,PPP1R9B,PHACTR4	1	0.1	IGBP1: P78318_p_2_1
DE	GO:0000976	transcription cis-regulatory region binding (GO:0000976)	34/549	5.16254e-06	0.000389255	2.50741	30.5255	HDAC5,CASZ1,HDAC1,ARX,HMGB2,ARID4A*,PRDM2,ARID4B*,ZBTB22,HMGB1*,CHD3,FOXO3,ZBTB4,YY1,SALL2,PRDM16,BBX,ZBTB7B,ZBED4,SOX5,DR1,NPM1,SOX11,SOX12,KLF1,DRAP1,ZBTB9,RBL2,TFDP1,TFDP2,CREBRF,TCF3,ZNF335,HMX1	3	0.09	HMGB1: P09429_p_2_1, ARID4A: P29374_p_2_1, ARID4B: Q4LE39_p_2_1
DE	GO:0019212	phosphatase inhibitor activity (GO:0019212)	6/23	2.38898e-05	0.00150108	13.026	138.624	PPP1R2,SET,PPP1R2B,PPP1R1B,ANP32E,PPP1R9B	0	0
DE	GO:0000987	cis-regulatory region sequence-specific DNA binding (GO:0000987)	54/1149	3.72991e-05	0.00177918	1.89147	19.2865	ZNF692*,PRDM4,MYT1*L,HMGB2,CHD2*,CCAR1,YY1,MECOM,SALL2,ZNF526,HOXA7,ZNF367,MYBL1,PKNOX2,SOX5,FOXD4*,FOXD1,SOX11,SOX12,MYT1*,MYCL,FOXD4*L5,FOXD4*L6,MYCN,IRF6,FOXD4*L3,FOXD4*L4,FOXD4*L1,ZSCAN29,HDAC5,ZBTB47,HDAC1,ZBTB45,FOXO3,ZBTB4,NEUROD1,NACC2,PRDM16,NACC1,HIVEP3,HIVEP2,ZBTB7B,NKX6-1,ZBTB7A,ZKSCAN1,ZBTB7C,IRX2,BCL11A*,DMRT2,IRX3,KLF1,TCF3,ZNF335,CC2D1A	5	0.09	CHD2: O14647_p_6_1, MYT1: Q01538_p_2_1, FOXD4: Q12950_p_1_1, ZNF692: Q9BU19_p_2_1, BCL11A: Q9H165_p_3_1
DE	GO:1990837	sequence-specific double-stranded DNA binding (GO:1990837)	38/712	4.18673e-05	0.00177918	2.1405	21.5784	HDAC5,PRDM4,ARX,HMGB2,ARID4A*,ZBTB45,ARID4B*,ZBTB22,HMGB1*,CHD3,FOXO3,CENPB,YY1,NEUROD1,CDC45*,PRDM16,BBX,ZNF787,HOXA7,ZBTB7B,ZBTB7A,MNX1,ZBED4,PKNOX2,SOX5,TSPYL2*,IRX3,SOX11,SOX12,LBX1,KLF1,MYCN,GRWD1*,IRF6,ZNF335,ZSCAN29,MCM2,HMX1	6	0.16	CDC45: O75419_p_2_1, HMGB1: P09429_p_2_1, ARID4A: P29374_p_2_1, ARID4B: Q4LE39_p_2_1, GRWD1: Q9BQ67_p_1_1, TSPYL2: Q9H2G4_p_3_1
DE	GO:0008301	DNA binding, bending (GO:0008301)	5/16	4.5167e-05	0.00177918	16.7493	167.579	FOXD4*,FOXD1,HMGB2,HMGB3*,HMGB1*	3	0.6	HMGB3: O15347_p_2_1, HMGB1: P09429_p_2_1, FOXD4: Q12950_p_1_1
DE	GO:0001046	core promoter sequence-specific DNA binding (GO:0001046)	7/37	4.71931e-05	0.00177918	8.62224	85.8884	DRAP1,GTF2A1,DR1,NPM1,HDAC1,UBTF,TAF1	0	0
DE	GO:0000400	four-way junction DNA binding (GO:0000400)	5/17	6.25882e-05	0.00211189	15.3527	148.598	YY1,WRN,HMGB2,HMGB3*,HMGB1*	2	0.4	HMGB3: O15347_p_2_1, HMGB1: P09429_p_2_1
DE	GO:0000978	RNA polymerase II cis-regulatory region sequence-specific DNA binding (GO:0000978)	53/1149	7.18644e-05	0.00211189	1.85079	17.6579	ZNF692*,PRDM4,MYT1*L,CHD2*,CCAR1,YY1,MECOM,SALL2,ZNF526,HOXA7,ZNF367,MYBL1,PKNOX2,SOX5,FOXD4*,FOXD1,SOX11,SOX12,MYT1*,MYCL,FOXD4*L5,FOXD4*L6,MYCN,IRF6,FOXD4*L3,FOXD4*L4,FOXD4*L1,ZSCAN29,HDAC5,ZBTB47,HDAC1,ZBTB45,FOXO3,ZBTB4,NEUROD1,NACC2,PRDM16,NACC1,HIVEP3,HIVEP2,ZBTB7B,NKX6-1,ZBTB7A,ZKSCAN1,ZBTB7C,IRX2,BCL11A*,DMRT2,IRX3,KLF1,TCF3,ZNF335,CC2D1A	5	0.09	CHD2: O14647_p_6_1, MYT1: Q01538_p_2_1, FOXD4: Q12950_p_1_1, ZNF692: Q9BU19_p_2_1, BCL11A: Q9H165_p_3_1
DE	GO:0031267	small GTPase binding (GO:0031267)	15/175	7.28238e-05	0.00211189	3.49427	33.2915	RABGAP1,EXOC8,WAS,RANGAP1,FGD1,AFDN*,FGD5,PAK1,KIF3A,PPP6R1,CDC42EP4,ARHGDIB,PLCE1,RAPGEF6*,PAK2	2	0.13	AFDN: P55196_p_5_1, RAPGEF6: Q8TEU7_p_1_1
DE	GO:0008331	high voltage-gated calcium channel activity (GO:0008331)	4/10	9.21725e-05	0.00248207	24.5255	227.887	CACNB1,CACNA1A,CACNA1S,CACNA1F	0	0
DE	GO:0000217	DNA secondary structure binding (GO:0000217)	6/33	0.00020905	0.00525412	8.19734	69.4556	YY1,WRN,HMGB2,HMGB3*,HMGB1*,CLSPN	2	0.33	HMGB3: O15347_p_2_1, HMGB1: P09429_p_2_1
DE	GO:0017025	TBP-class protein binding (GO:0017025)	5/22	0.000238545	0.00562072	10.8344	90.3696	DRAP1,GTF2A1,DR1,TAF1L,TAF1	0	0
DE	GO:0051020	GTPase binding (GO:0051020)	15/201	0.000335978	0.00735598	3.00177	24.0096	RABGAP1,EXOC8,WAS,RANGAP1,FGD1,AFDN*,FGD5,PAK1,KIF3A,PPP6R1,CDC42EP4,ARHGDIB,PLCE1,RAPGEF6*,PAK2	2	0.13	AFDN: P55196_p_5_1, RAPGEF6: Q8TEU7_p_1_1
DE	GO:0043565	sequence-specific DNA binding (GO:0043565)	35/707	0.000351214	0.00735598	1.96568	15.6352	CSRNP3*,PRDM4,ARX,ZBTB45,PRDM2,ZBTB22,FOXO3,ZBTB4,CENPB,YY1,NEUROD1,PRDM16,BBX,ZNF787,HOXA7,ZBTB7B,ZBTB7A,MNX1,PKNOX2,MBD3,FOXD4*,IRX2,FOXD1,KDM2A,IRX3,SOX12,LBX1,MYCN,NCL,ERF,ZNF316,IRF6,ZSCAN29,HMX1,TAF1	2	0.06	FOXD4: Q12950_p_1_1, CSRNP3: Q8WYN3_p_1_1
DE	GO:0140297	DNA-binding transcription factor binding (GO:0140297)	15/208	0.000482776	0.00957929	2.89185	22.0821	PIAS4,HDAC5,NPM1,HDAC1,CHD4,HMGB1*,NOC2L,SIRT1,NEUROD1,RBL2,PRDM16,TCF3,ZBTB7A,PTMA,TAF1	1	0.07	HMGB1: P09429_p_2_1
DE	GO:0140296	general transcription initiation factor binding (GO:0140296)	5/26	0.000545694	0.0102863	8.76894	65.885	DRAP1,GTF2A1,DR1,TAF1L,TAF1	0	0
DE	GO:0001067	transcription regulatory region nucleic acid binding (GO:0001067)	15/212	0.000589046	0.0105748	2.83255	21.0657	HDAC5,HMGB2,ARID4A*,SOX11,ARID4B*,SOX12,CHD3,HMGB1*,FOXO3,KLF1,YY1,PRDM16,ZNF335,ZBED4,SOX5	3	0.2	HMGB1: P09429_p_2_1, ARID4A: P29374_p_2_1, ARID4B: Q4LE39_p_2_1
DE	GO:0005085	guanyl-nucleotide exchange factor activity (GO:0005085)	12/149	0.000659765	0.011306	3.24979	23.8002	EIF2B5,PSD,FGD5,DNMBP,DENND4A,EEF1D,MADD,PLCE1,RAPGEF2,DENND6A,RAPGEF6*,FGD1	1	0.08	RAPGEF6: Q8TEU7_p_1_1
DE	GO:0003743	translation initiation factor activity (GO:0003743)	6/41	0.000708773	0.0116177	6.32106	45.8402	EIF2B5,EIF5,EIF3J,EIF3CL*,EIF3C*,EIF3D*	3	0.5	EIF3CL: B5ME19_p_5_1, EIF3D: O15371_p_1_1, EIF3C: Q99613_p_5_1
DE	GO:0004864	protein phosphatase inhibitor activity (GO:0004864)	5/29	0.000922414	0.0144896	7.67164	53.6134	PPP1R2,SET,PPP1R2B,PPP1R1B,PPP1R9B	0	0
DE	GO:0001227	DNA-binding transcription repressor activity, RNA polymerase II-specific (GO:0001227)	16/256	0.0014741	0.0222294	2.4793	16.1643	IRX2,ZNF692*,MYT1L,BCL11A*,IRX3,PRDM2,ZBTB45,FOXO3,ZBTB4,YY1,NACC2,PRDM16,NACC1,ERF,TCF3,CC2D1A	2	0.12	ZNF692: Q9BU19_p_2_1, BCL11A: Q9H165_p_3_1
DE	GO:0019903	protein phosphatase binding (GO:0019903)	10/123	0.0016921	0.0245354	3.27484	20.8994	PPP1R15A,IGBP1*,KIF3A,PPP6R1,FCRL3,GTF2F1,STRN4,SLC9A1,PPP1R9B,PHACTR4	1	0.1	IGBP1: P78318_p_2_1
DE	GO:0005078	MAP-kinase scaffold activity (GO:0005078)	3/11	0.00264699	0.0369598	13.7682	81.7048	KSR1,MAPK8IP2,MAPK8IP1	0	0
DE	GO:0005245	voltage-gated calcium channel activity (GO:0005245)	5/37	0.0028427	0.038275	5.75136	33.7202	CACNB1,CACNA1A,CACNA1S,CACNA1F,PKD2	0	0
DE	GO:0042826	histone deacetylase binding (GO:0042826)	8/93	0.00338862	0.0440521	3.47464	19.7615	TOP2B,HDAC5,HDAC1,NACC2,NACC1,AKAP8*,CHD4,PHF6*	2	0.25	AKAP8: O43823_p_2_1, PHF6: Q8IWS0_p_3_1
DE	GO:0001228	DNA-binding transcription activator activity, RNA polymerase II-specific (GO:0001228)	18/333	0.0037771	0.0474656	2.12505	11.8552	CASZ1,PRDM4,SOX11,PRDM2,SOX12,FOXO3,YY1,NEUROD1,MYCN,TFDP1,MECOM,SALL2,TFDP2,PRDM16,CREBRF,TCF3,HOXA7,MYBL1	0	0
AE	GO:0003677	DNA binding (GO:0003677)	19/811	1.43797e-05	0.00260163	3.4114	38.0361	CREBZF*,FOXD2,SRRT,ZBTB21,HNRNPU,SOX12,ARID1A,ARID3C,CTCFL,TFPT*,NTHL1,TDP2,KAT6A,SP4,ZNF316,SOX9,ERCC6,HDGFL1*,MEN1	3	0.16	TFPT: P0C1Z6_p_1_1, HDGFL1: Q5TGJ6_p_1_1, CREBZF: Q9NS37_p_2_1
AE	GO:0003723	RNA binding (GO:0003723)	26/1406	2.32288e-05	0.00260163	2.7396	29.2318	DIDO1,DDX23*,SRRT,HNRNPU,UBFD1,PWP2,SPOUT1*,CCAR1,HSP90B1,TCOF1,KIF1C,SLC16A3*,MYH10*,SRPK2,CLUH,SECISBP2L,UTP18*,CAPRIN1,MPHOSPH10,MYH9*,ACIN1,MATR3*,PRPF31*,RBM22,EIF3B,FAM50A*	9	0.35	SLC16A3: O15427_p_2_1, MYH9: P35579_p_2_1, MYH10: P35580_p_4_1, MATR3: P43243_p_1_1, FAM50A: Q14320_p_2_1, SPOUT1: Q5T280_p_2_1, PRPF31: Q8WWY3_p_1_1, DDX23: Q9BUQ8_p_3_1, UTP18: Q9Y5J1_p_2_1
AE	GO:0016922	nuclear receptor binding (GO:0016922)	6/120	0.000323969	0.0241897	7.06516	56.7676	NCOR2,DAXX,TAF11,ARID1A,SIRT1*,MED17	1	0.17	SIRT1: Q96EB6_p_1_1; Q96EB6_p_4_1
AE	GO:0050780	dopamine receptor binding (GO:0050780)	2/6	0.00085471	0.0478637	65.7053	464.191	CLIC6,GNAS	0	0
AE	GO:0043565	sequence-specific DNA binding (GO:0043565)	14/707	0.00108369	0.0485494	2.78381	19.0061	UPF2*,FOXD2,ZBTB21,HNRNPU,SOX12,EVX2,HOXC11,HOXA11,CTCFL,SP4,SP3,ZNF316,SOX9,HOXB7	1	0.07	UPF2: Q9HAU5_p_2_1
EQ	GO:0003723	RNA binding (GO:0003723)	18/1406	6.82829e-07	7.10142e-05	4.80968	68.2832	SF3B2*,ZC3H4*,USP10,SRRT*,PRPF40B,GPATCH4,TCF20,RTF1*,CHD2*,GNL2*,VIRMA,PNN*,PURA*,LAS1L,NOA1*,ACIN1*,SPTBN1*,PPARGC1B*	12	0.67	CHD2: O14647_p_7_1, PURA: Q00577_p_2_1, SPTBN1: Q01082_p_3_1, SF3B2: Q13435_p_3_1, GNL2: Q13823_p_2_1, PPARGC1B: Q86YN6_p_1_1, NOA1: Q8NC60_p_1_1, RTF1: Q92541_p_6_1, SRRT: Q9BXP5_p_2_1, PNN: Q9H307_p_2_1, ACIN1: Q9UKV3_p_7_1, ZC3H4: Q9UPT8_p_10_1
EQ	GO:0099122	RNA polymerase II C-terminal domain binding (GO:0099122)	2/8	0.000314741	0.0163665	100.636	811.507	RTF1*,SCAF1	1	0.5	RTF1: Q92541_p_6_1
KR	GO:0003723	RNA binding (GO:0003723)	30/1406	9.99686e-08	1.50953e-05	3.44309	55.4971	ANKRD17*,USP36,POP1,ZC3H4*,USP10,PRKRIP1*,RRP1,UTP23,NKAP,NOL8*,GPATCH4,CHD3,GPATCH8,EXOSC9,SURF6*,DHX16,RBM34,TRMT10A*,SRRM4,RPL41*,NIFK,KNOP1,SSRP1,RRP1B,JMJD6,FAM133B,CMSS1,MYBBP1A,BUD13,METAP2	7	0.23	ANKRD17: O75179_p_6_1, SURF6: O75683_p_1_1; O75683_p_2_1, RPL41: P62945_p_1_1, NOL8: Q76FK4_p_4_1, TRMT10A: Q8TBZ6_p_1_1, PRKRIP1: Q9H875_p_1_1, ZC3H4: Q9UPT8_p_2_1
KR	GO:0008301	DNA binding, bending (GO:0008301)	4/16	4.75973e-06	0.000359359	46.2494	566.801	LEF1,FOXI1,FOXL1,HMGB4	0	0
KR	GO:0005248	voltage-gated sodium channel activity (GO:0005248)	4/22	1.84852e-05	0.000877638	30.8236	335.932	SCN8A,SCN2A,SCN3A,SCN1A*	1	0.25	SCN1A: P35498_p_4_1
KR	GO:0001067	transcription regulatory region nucleic acid binding (GO:0001067)	9/212	2.77463e-05	0.000877638	6.31291	66.2377	KDM5A,TCF7L2,ZNF639,FOXH1,FOXI1,CHD3,BRD7,SMARCA2*,VSX1	1	0.11	SMARCA2: P51531_p_3_1; P51531_p_6_1
KR	GO:0003677	DNA binding (GO:0003677)	18/811	2.90609e-05	0.000877638	3.35376	35.0338	KDM5A,NKX2-8,TCF7L2,TCF7L1*,POU2F1,CHD8,FOXH1,LEF1,FOXI1,INO80,CHD3,FOXL1,SMARCA2*,HMGB4,TOPORS,MYBBP1A,MCM3,SURF6*	3	0.17	SURF6: O75683_p_1_1; O75683_p_2_1, SMARCA2: P51531_p_3_1; P51531_p_6_1, TCF7L1: Q9HCS4_p_4_1
KR	GO:0008195	phosphatidate phosphatase activity (GO:0008195)	3/13	0.000105409	0.00265279	41.3396	378.574	LPIN1,LPIN2,LPIN3	0	0
KR	GO:0035064	methylated histone binding (GO:0035064)	5/68	0.000143909	0.00310433	11.0608	97.8475	KDM5A,L3MBTL1,CHD8,CHD5,PHF13	0	0
KR	GO:0005272	sodium channel activity (GO:0005272)	4/38	0.000170255	0.00321357	16.3052	141.5	SCN8A,SCN2A,SCN3A,SCN1A*	1	0.25	SCN1A: P35498_p_4_1
KR	GO:0000976	transcription cis-regulatory region binding (GO:0000976)	13/549	0.000212328	0.00356239	3.49634	29.5699	KDM5A,TCF7L2,FOXH1,LEF1,FOXI1,CHD3,SMARCA2*,NPAS3,ZNF639,BRD7,VSX1,NKX2-2,VSX2	1	0.08	SMARCA2: P51531_p_3_1; P51531_p_6_1
KR	GO:0030274	LIM domain binding (GO:0030274)	2/5	0.000528823	0.00798523	91.2644	688.577	LDB1,LDB2	0	0
KR	GO:1990837	sequence-specific double-stranded DNA binding (GO:1990837)	14/712	0.000783456	0.0107547	2.8887	20.6594	KDM5A,NKX2-8,TCF7L2,TCF7L1*,FOXH1,LEF1,FOXI1,CHD3,SMARCA2*,ZNF639,MCM3,BRD7,VSX1,VSX2	2	0.14	SMARCA2: P51531_p_3_1; P51531_p_6_1, TCF7L1: Q9HCS4_p_4_1
KR	GO:0140034	methylation-dependent protein binding (GO:0140034)	4/63	0.00119196	0.0149988	9.38438	63.1771	KDM5A,L3MBTL1,CHD8,PHF13	0	0
KR	GO:0070016	armadillo repeat domain binding (GO:0070016)	2/9	0.00186733	0.0216897	39.1054	245.709	TCF7L2,LEF1	0	0
KR	GO:0046974	histone methyltransferase activity (H3-K9 specific) (GO:0046974)	2/10	0.00232292	0.0250544	34.2155	207.515	SETD5*,EHMT2	1	0.5	SETD5: Q9C0A6_p_2_1
KR	GO:0070742	C2H2 zinc finger domain binding (GO:0070742)	2/12	0.00337426	0.0339676	27.3697	155.777	EHMT2,LEF1	0	0
KR	GO:0005161	platelet-derived growth factor receptor binding (GO:0005161)	2/13	0.0039686	0.0374537	24.8803	137.571	PDGFA,VEGFA	0	0
AK	GO:0003723	RNA binding (GO:0003723)	25/1406	1.04985e-11	9.34368e-10	6.99448	176.819	RBM25*,KDM1A*,NKAP*,NOLC1,ZCCHC17,H1-10,GIGYF2*,TCOF1,PES1*,BMS1*,RRP12,EIF2A*,NOP58,CCDC137*,RCC2,GTF2F1,H1-3,H1-2,FAM133B,H1-5,H1-4,SARS1*,MATR3,RPL29,CDK13*	10	0.4	PES1: O00541_p_2_1, KDM1A: O60341_p_1_1, SARS1: P49591_p_2_1, RBM25: P49756_p_1_1, CDK13: Q14004_p_11_1, BMS1: Q14692_p_1_1, CCDC137: Q6PK04_p_1_1, GIGYF2: Q6Y7W6_p_4_1, NKAP: Q8N5F7_p_9_1, EIF2A: Q9BY44_p_1_1
AK	GO:0031492	nucleosomal DNA binding (GO:0031492)	5/33	1.23522e-07	5.49674e-06	52.2558	831.225	H1-5,H1-4,H1-10,H1-3,H1-2	0	0
KQ	GO:0003723	RNA binding (GO:0003723)	13/1406	4.82861e-06	0.000400775	5.77487	70.69	SF3B2*,TCF20,SMG7*,LSM4,SARS1*,SRP72,DNAJC21,ZNF207*,EIF3H*,UBAP2L,NOL10*,ABCF1*,SEC63	7	0.54	EIF3H: O15372_p_3_1, ZNF207: O43670_p_1_1, SARS1: P49591_p_1_1, SF3B2: Q13435_p_7_1, ABCF1: Q8NE71_p_1_1, SMG7: Q92540_p_1_1, NOL10: Q9BSC4_p_2_1
KQ	GO:0004114	3',5'-cyclic-nucleotide phosphodiesterase activity (GO:0004114)	2/21	0.000923881	0.0307107	51.1887	357.652	PDE4B,PDE6A*	1	0.5	PDE6A: P16499_p_1_1
KQ	GO:0004112	cyclic-nucleotide phosphodiesterase activity (GO:0004112)	2/23	0.00111003	0.0307107	46.3089	315.057	PDE4B,PDE6A*	1	0.5	PDE6A: P16499_p_1_1
ES	GO:0003723	RNA binding (GO:0003723)	41/1406	1.37145e-06	0.000311319	2.47445	33.4042	SF3B2,RPLP0,SRRT,MAK16,NOLC1,NOL8,NOC2L,AATF,CHD2,WDR43,AFF2,RIMS1,TCOF1,BMS1,CWC22,DHX37,UBTF,DHX16,DROSHA,UTP14A,SF3A3,PRPF38A*,MTERF4*,RBM19,EIF2AK2,PRPF40B,GNL2,NPM3,GTF2F1,PUS7,CDK11B,FTSJ3,SON,MYBBP1A,MFAP1,DKC1,L1TD1,NOL10,ZNF579*,EIF3C,TNRC6A	3	0.07	MTERF4: Q7Z6M4_p_1_1, ZNF579: Q8NAF0_p_2_1, PRPF38A: Q8NAV1_p_1_1
ES	GO:0140033	acetylation-dependent protein binding (GO:0140033)	4/21	0.000148802	0.00935622	17.8452	157.268	BRD3,BRD2*,BRD4,BRDT	1	0.25	BRD2: P25440_p_8_1
ES	GO:0070577	lysine-acetylated histone binding (GO:0070577)	4/21	0.000148802	0.00935622	17.8452	157.268	BRD3,BRD2*,BRD4,BRDT	1	0.25	BRD2: P25440_p_8_1
ES	GO:0140034	methylation-dependent protein binding (GO:0140034)	6/63	0.000180836	0.00935622	8.02897	69.193	L3MBTL1,MBTD1,CBX2,TP53BP1,CHD1,KDM7A	0	0
ES	GO:0004674	protein serine/threonine kinase activity (GO:0004674)	14/344	0.000206084	0.00935622	3.29314	27.9496	BRD2*,CDK11A,NRK,MINK1,EIF2AK2,CDK11B,TTBK1,RPS6KC1,BMP2K,TNIK,MAP3K13,BRD4,MAP4K4,MAP3K12	1	0.07	BRD2: P25440_p_8_1
ES	GO:0035064	methylated histone binding (GO:0035064)	6/68	0.000275739	0.0104321	7.37959	60.4836	L3MBTL1,MBTD1,CBX2,TP53BP1,CHD1,KDM7A	0	0

## Sheet: CC
poly type	GO id	GO term	Overlap	p-value	adj p-value	odds ratio	combined score	enriched genes	count genes helix	fraction genes helix	enriched genes helix
ER	GO:0071010	prespliceosome (GO:0071010)	4/15	3.59028e-06	0.00014221	50.4565	632.587	SNRNP70*,LUC7L*,LUC7L3*,LUC7L2*	4	1	LUC7L3: O95232_p_1_1; O95232_p_2_1; O95232_p_3_1, SNRNP70: P08621_p_3_1; P08621_p_4_1; P08621_p_8_1; P08621_p_9_1, LUC7L: Q9NQ29_p_1_1, LUC7L2: Q9Y383_p_1_1
ER	GO:0071004	U2-type prespliceosome (GO:0071004)	4/15	3.59028e-06	0.00014221	50.4565	632.587	SNRNP70*,LUC7L*,LUC7L3*,LUC7L2*	4	1	LUC7L3: O95232_p_1_1; O95232_p_2_1; O95232_p_3_1, SNRNP70: P08621_p_3_1; P08621_p_4_1; P08621_p_8_1; P08621_p_9_1, LUC7L: Q9NQ29_p_1_1, LUC7L2: Q9Y383_p_1_1
ER	GO:0043232	intracellular non-membrane-bounded organelle (GO:0043232)	24/1158	3.84352e-06	0.00014221	3.22089	40.1617	FHOD3*,MAGI1,RNF20*,VCP*,SETD2,GTF3C3*,TPM4*,MYO10*,SCAF11,FAF2*,DDX23*,TCHH*,NOL7*,ZFC3H1*,UPF3B*,XPC,UPF3A*,SPTY2D1*,RBM15B,CALD1*,SH3PXD2B*,TNIK*,DBN1*,EIF3A*	19	0.79	SH3PXD2B: A1X283_p_2_1, ZFC3H1: O60293_p_6_1, VCP: P55072_p_1_1, TPM4: P67936_p_1_1, CALD1: Q05682_p_4_1, TCHH: Q07283_p_10_1; Q07283_p_11_1; Q07283_p_7_1, EIF3A: Q14152_p_4_1; Q14152_p_5_1, DBN1: Q16643_p_1_1, FHOD3: Q2V2M9_p_1_1, RNF20: Q5VTR2_p_2_1; Q5VTR2_p_3_1, SPTY2D1: Q68D10_p_3_1, FAF2: Q96CS3_p_1_1, DDX23: Q9BUQ8_p_4_1, UPF3B: Q9BZI7_p_2_1; Q9BZI7_p_3_1; Q9BZI7_p_4_1; Q9BZI7_p_5_1, UPF3A…
ER	GO:0005685	U1 snRNP (GO:0005685)	4/18	7.91159e-06	0.000219546	39.6384	465.639	SNRNP70*,LUC7L*,LUC7L3*,LUC7L2*	4	1	LUC7L3: O95232_p_1_1; O95232_p_2_1; O95232_p_3_1, SNRNP70: P08621_p_3_1; P08621_p_4_1; P08621_p_8_1; P08621_p_9_1, LUC7L: Q9NQ29_p_1_1, LUC7L2: Q9Y383_p_1_1
ER	GO:0097525	spliceosomal snRNP complex (GO:0097525)	5/51	3.58463e-05	0.000795787	15.1615	155.197	SNRNP70*,DDX23*,LUC7L*,LUC7L3*,LUC7L2*	5	1	LUC7L3: O95232_p_1_1; O95232_p_2_1; O95232_p_3_1, SNRNP70: P08621_p_3_1; P08621_p_4_1; P08621_p_8_1; P08621_p_9_1, DDX23: Q9BUQ8_p_4_1, LUC7L: Q9NQ29_p_1_1, LUC7L2: Q9Y383_p_1_1
ER	GO:0005684	U2-type spliceosomal complex (GO:0005684)	6/89	5.00775e-05	0.000881992	10.1359	100.365	IK*,SNRNP70*,CWC22,LUC7L*,LUC7L3*,LUC7L2*	5	0.83	LUC7L3: O95232_p_1_1; O95232_p_2_1; O95232_p_3_1, SNRNP70: P08621_p_3_1; P08621_p_4_1; P08621_p_8_1; P08621_p_9_1, IK: Q13123_p_4_1; Q13123_p_5_1; Q13123_p_6_1, LUC7L: Q9NQ29_p_1_1, LUC7L2: Q9Y383_p_1_1
ER	GO:0005634	nucleus (GO:0005634)	54/4484	5.56211e-05	0.000881992	2.02151	19.8046	RERE*,TCERG1*,SETD2,ATN1*,FOXM1*,DCAF6*,CCAR1*,SNRNP70*,PSMD3*,CWC22,DHX15*,RIMBP3C,RIMBP3B,RBM5,KPNA1*,EIF5B*,IK*,PEG3*,TFE3*,SAFB*,GNL1,NCOR1*,CCNE1,LUC7L3*,PPIG*,TNIK*,HDGFL2*,JDP2*,RABL6*,VCP*,SP100,YTHDC1*,DDX23*,XPC,PTTG1IP*,RBM15B,TBX22,MYO6*,SAFB2*,DHX38*,DROSHA,NLRP1,BRD4*,CBX8*,RNF20*,MICAL3,ZFC3H1*,UPF3B*,UPF3A*,U2SURP*,FOSL1*,ACIN1*,PAXBP1,BRDT*	39	0.72	TCERG1: O14776_p_6_1, U2SURP: O15042_p_4_1, DHX15: O43143_p_2_1, PSMD3: O43242_p_2_1, ZFC3H1: O60293_p_6_1, EIF5B: O60841_p_4_1, BRD4: O60885_p_15_1, NCOR1: O75376_p_6_1; O75376_p_7_1, LUC7L3: O95232_p_1_1; O95232_p_2_1; O95232_p_3_1, SNRNP70: P08621_p_3_1; P08621_p_4_1; P08621_p_8_1; P08621_p_9_1, FOSL1: P15407_p_2_1, TFE3: P19532_p_2_1, KPNA1: P52294_p_1_1, PTTG1IP: P53801_p_3_1, ATN1: P54259_p…
ER	GO:0031981	nuclear lumen (GO:0031981)	15/745	0.000396563	0.00527317	2.97681	23.3164	MAGI1,RNF20*,IK*,GTF3C3*,MYO10*,SCAF11,DDX23*,NOL7*,ZFC3H1*,UPF3B*,XPC,UPF3A*,SPTY2D1*,RBM15B,EIF3A*	11	0.73	ZFC3H1: O60293_p_6_1, IK: Q13123_p_4_1; Q13123_p_5_1; Q13123_p_6_1, EIF3A: Q14152_p_4_1; Q14152_p_5_1, RNF20: Q5VTR2_p_2_1; Q5VTR2_p_3_1, SPTY2D1: Q68D10_p_3_1, DDX23: Q9BUQ8_p_4_1, UPF3B: Q9BZI7_p_2_1; Q9BZI7_p_3_1; Q9BZI7_p_4_1; Q9BZI7_p_5_1, UPF3A: Q9H1J1_p_2_1, MYO10: Q9HD67_p_2_1, NOL7: Q9UMY1_p_1_1, GTF3C3: Q9Y5Q9_p_1_1
ER	GO:0043231	intracellular membrane-bounded organelle (GO:0043231)	57/5192	0.000427554	0.00527317	1.81527	14.0818	RERE*,TCERG1*,ANKRD13B*,SETD2,ATN1*,FOXM1*,DCAF6*,CCAR1*,FRAT1,SNRNP70*,PSMD3*,CWC22,DHX15*,RIMBP3C,RIMBP3B,RBM5,KPNA1*,SCYL1*,EIF5B*,IK*,PEG3*,TFE3*,SAFB*,GNL1,NCOR1*,CCNE1,LUC7L3*,PPIG*,TNIK*,HDGFL2*,JDP2*,RABL6*,VCP*,SP100,YTHDC1*,DDX23*,XPC,PTTG1IP*,RBM15B,TBX22,MYO6*,SAFB2*,DHX38*,DROSHA,NLRP1,BRD4*,CBX8*,RNF20*,MICAL3,ZFC3H1*,UPF3B*,UPF3A*,U2SURP*,FOSL1*,ACIN1*,PAXBP1,BRDT*	41	0.72	TCERG1: O14776_p_6_1, U2SURP: O15042_p_4_1, DHX15: O43143_p_2_1, PSMD3: O43242_p_2_1, ZFC3H1: O60293_p_6_1, EIF5B: O60841_p_4_1, BRD4: O60885_p_15_1, NCOR1: O75376_p_6_1; O75376_p_7_1, LUC7L3: O95232_p_1_1; O95232_p_2_1; O95232_p_3_1, SNRNP70: P08621_p_3_1; P08621_p_4_1; P08621_p_8_1; P08621_p_9_1, FOSL1: P15407_p_2_1, TFE3: P19532_p_2_1, KPNA1: P52294_p_1_1, PTTG1IP: P53801_p_3_1, ATN1: P54259_p…
ER	GO:0005856	cytoskeleton (GO:0005856)	13/600	0.000495644	0.00550165	3.18414	24.2302	FHOD3*,LAD1*,TPM4*,TCHH*,MPRIP*,MAP7D3*,CALD1*,MAP7D1*,MAP7D2*,MYO6*,MAP7*,TNIK*,DBN1*	13	1	LAD1: O00515_p_1_1, TPM4: P67936_p_1_1, CALD1: Q05682_p_4_1, TCHH: Q07283_p_10_1; Q07283_p_11_1; Q07283_p_7_1, MAP7: Q14244_p_1_1; Q14244_p_3_1, DBN1: Q16643_p_1_1, FHOD3: Q2V2M9_p_1_1, MAP7D1: Q3KQU3_p_1_1, MPRIP: Q6WCQ1_p_3_1, MAP7D3: Q8IWC1_p_2_1, MAP7D2: Q96T17_p_1_1, TNIK: Q9UKE5_p_1_1, MYO6: Q9UM54_p_2_1
ER	GO:0005730	nucleolus (GO:0005730)	14/733	0.00103563	0.0104504	2.80126	19.2523	MAGI1,RNF20*,GTF3C3*,MYO10*,SCAF11,DDX23*,NOL7*,ZFC3H1*,UPF3B*,XPC,UPF3A*,SPTY2D1*,RBM15B,EIF3A*	10	0.71	ZFC3H1: O60293_p_6_1, EIF3A: Q14152_p_4_1; Q14152_p_5_1, RNF20: Q5VTR2_p_2_1; Q5VTR2_p_3_1, SPTY2D1: Q68D10_p_3_1, DDX23: Q9BUQ8_p_4_1, UPF3B: Q9BZI7_p_2_1; Q9BZI7_p_3_1; Q9BZI7_p_4_1; Q9BZI7_p_5_1, UPF3A: Q9H1J1_p_2_1, MYO10: Q9HD67_p_2_1, NOL7: Q9UMY1_p_1_1, GTF3C3: Q9Y5Q9_p_1_1
ER	GO:0005884	actin filament (GO:0005884)	4/72	0.0019564	0.0180967	8.13863	50.7577	SPTBN4,TPM4*,MYO6*,DBN1*	3	0.75	TPM4: P67936_p_1_1, DBN1: Q16643_p_1_1, MYO6: Q9UM54_p_2_1
ER	GO:0015629	actin cytoskeleton (GO:0015629)	8/316	0.0023778	0.0203027	3.65225	22.0653	SPTBN4,LAD1*,MPRIP*,TPM4*,CALD1*,MYO6*,SH3PXD2B*,DBN1*	7	0.88	SH3PXD2B: A1X283_p_2_1, LAD1: O00515_p_1_1, TPM4: P67936_p_1_1, CALD1: Q05682_p_4_1, DBN1: Q16643_p_1_1, MPRIP: Q6WCQ1_p_3_1, MYO6: Q9UM54_p_2_1
EK	GO:0005634	nucleus (GO:0005634)	85/4484	3.35854e-06	0.000594462	1.90253	23.9795	RERE*,GABPB2,HP1BP3,NKAP,ARID4A,RSF1,CWC25*,HMGB1*,CHD3,LARP1B,PTMS*,MECP2,PAGR1,ZCWPW1,PSMD7*,ZNF608,CHAF1A*,RBMX2,DHX15*,PSMD1*,FAM170A,RBM5,UPF2*,BRD2,EIF5B,IK*,HSP90AA1*,LIG1*,PDE4D,ZFP91,GTF2F1,SRRM1,NCOR2,CLIP1*,NCOR1,PSMA4*,INCENP*,ZNF638,CHMP4B*,NCOA7*,PPIG*,SLU7*,HDGFL2*,RABL6,TSPYL5,SP100*,SF3B2,ANKRD11,WBP4,CXXC1*,RPS27L*,CACNA1A,USP18,HSP90B1,RAD51AP1,TBRG1,SAFB2,SNRPB2*,TP53BP1,CLSPN…	30	0.35	DHX15: O43143_p_3_1, SLU7: O95391_p_2_1, HSP90AA1: P07900_p_1_1, SNRPB2: P08579_p_1_1, HMGB1: P09429_p_1_1, LIG1: P18858_p_1_1, PTMS: P20962_p_1_1, SP100: P23497_p_5_1, PSMA4: P25789_p_1_1, MSN: P26038_p_1_1, CLIP1: P30622_p_1_1, HOXC8: P31273_p_1_1, DEK: P35659_p_2_1, PSMD7: P51665_p_2_1, CHAF1A: Q13111_p_1_1; Q13111_p_2_1, IK: Q13123_p_2_1, PPIG: Q13427_p_1_1, TAF3: Q5VWG9_p_6_1; Q5VWG9_p_7_1; …
EK	GO:0043231	intracellular membrane-bounded organelle (GO:0043231)	92/5192	1.90281e-05	0.00168399	1.77474	19.2907	ITSN2*,RERE*,GABPB2,SLC4A1AP,HP1BP3,ICA1*,NKAP,ARID4A,RSF1,CWC25*,HMGB1*,CHD3,LARP1B,PTMS*,MECP2,PAGR1,ZCWPW1,PSMD7*,ZNF608,CHAF1A*,RBMX2,DHX15*,PSMD1*,FAM170A,RBM5,UPF2*,BRD2,EIF5B,IK*,HSP90AA1*,LIG1*,PDE4D,SPINK5*,ZFP91,GTF2F1,SRRM1,NCOR2,CLIP1*,NCOR1,PSMA4*,INCENP*,ZNF638,CHMP4B*,NCOA7*,PPIG*,SLU7*,HDGFL2*,RABL6,TSPYL5,SP100*,SF3B2,ANKRD11,WBP4,CXXC1*,RPS27L*,CACNA1A,USP18,HSP90B1,RAD51AP1,TBR…	36	0.39	DHX15: O43143_p_3_1, SLU7: O95391_p_2_1, HSP90AA1: P07900_p_1_1, SNRPB2: P08579_p_1_1, HMGB1: P09429_p_1_1, LIG1: P18858_p_1_1, ATP2B1: P20020_p_4_1; P20020_p_5_1, PTMS: P20962_p_1_1, SP100: P23497_p_5_1, PSMA4: P25789_p_1_1, MSN: P26038_p_1_1, CLIP1: P30622_p_1_1, HOXC8: P31273_p_1_1, DEK: P35659_p_2_1, PSMD7: P51665_p_2_1, ICA1: Q05084_p_1_1, CHAF1A: Q13111_p_1_1; Q13111_p_2_1, IK: Q13123_p_2_1…
EK	GO:0005684	U2-type spliceosomal complex (GO:0005684)	7/89	0.000100631	0.00593721	7.17839	66.0703	IK*,SF3B2,RBMX2,WBP4,CWC25*,PRPF40A,SNRPB2*	3	0.43	SNRPB2: P08579_p_1_1, IK: Q13123_p_2_1, CWC25: Q9NXE8_p_2_1; Q9NXE8_p_3_1
EK	GO:0031010	ISWI-type complex (GO:0031010)	3/10	0.000194785	0.00861922	35.5678	303.878	HMGXB4,RSF1,SMARCA1	0	0
EK	GO:0071005	U2-type precatalytic spliceosome (GO:0071005)	5/50	0.000331879	0.0117485	9.28154	74.3521	IK*,SF3B2,RBMX2,WBP4,SNRPB2*	2	0.4	SNRPB2: P08579_p_1_1, IK: Q13123_p_2_1
EK	GO:0071011	precatalytic spliceosome (GO:0071011)	5/52	0.00039922	0.011777	8.88568	69.5393	IK*,SF3B2,RBMX2,WBP4,SNRPB2*	2	0.4	SNRPB2: P08579_p_1_1, IK: Q13123_p_2_1
EK	GO:0005819	spindle (GO:0005819)	9/192	0.00055265	0.0139742	4.1498	31.1268	EML4,DIAPH1,NCOR1,INCENP*,CSPP1*,CBX1,BUB1B,KIFAP3,SPOUT1*	3	0.33	CSPP1: Q1MSJ5_p_3_1, SPOUT1: Q5T280_p_1_1, INCENP: Q9NQS7_p_7_1; Q9NQS7_p_8_1
EK	GO:0005694	chromosome (GO:0005694)	8/160	0.0007336	0.0162309	4.42896	31.9662	RAD51AP1,IK*,INCENP*,RAD21*,BMS1*,HP1BP3,DDX21,HMGB1*	5	0.62	RAD21: O60216_p_2_1, HMGB1: P09429_p_1_1, IK: Q13123_p_2_1, BMS1: Q14692_p_6_1, INCENP: Q9NQS7_p_7_1; Q9NQS7_p_8_1
EK	GO:0016589	NURF complex (GO:0016589)	2/5	0.00141179	0.0249886	55.1074	361.664	HMGXB4,SMARCA1	0	0
EK	GO:0098889	intrinsic component of presynaptic membrane (GO:0098889)	2/5	0.00141179	0.0249886	55.1074	361.664	ATP2B3*,ATP2B1*	2	1	ATP2B1: P20020_p_4_1; P20020_p_5_1, ATP2B3: Q16720_p_2_1
EK	GO:0005686	U2 snRNP (GO:0005686)	3/20	0.00169278	0.0272383	14.6382	93.4117	SF3B2,RBMX2,SNRPB2*	1	0.33	SNRPB2: P08579_p_1_1
EK	GO:0015630	microtubule cytoskeleton (GO:0015630)	11/331	0.0023553	0.0347406	2.90529	17.5801	EML4,CLIP1*,INCENP*,CSPP1*,MAP1B,MAP7D2*,CBX1,BUB1B,KIF21A,KIFAP3,HOXC8*	5	0.45	CLIP1: P30622_p_1_1, HOXC8: P31273_p_1_1, CSPP1: Q1MSJ5_p_3_1, MAP7D2: Q96T17_p_6_1, INCENP: Q9NQS7_p_7_1; Q9NQS7_p_8_1
EK	GO:0099056	integral component of presynaptic membrane (GO:0099056)	2/7	0.00291787	0.0397279	33.0611	192.974	ATP2B3*,ATP2B1*	2	1	ATP2B1: P20020_p_4_1; P20020_p_5_1, ATP2B3: Q16720_p_2_1
EK	GO:0097525	spliceosomal snRNP complex (GO:0097525)	4/51	0.00329741	0.0416886	7.07855	40.4512	SF3B2,RBMX2,PRPF40A,SNRPB2*	1	0.25	SNRPB2: P08579_p_1_1
EK	GO:0099699	integral component of synaptic membrane (GO:0099699)	2/8	0.00385965	0.0448855	27.5495	153.098	ATP2B3*,ATP2B1*	2	1	ATP2B1: P20020_p_4_1; P20020_p_5_1, ATP2B3: Q16720_p_2_1
EK	GO:0000793	condensed chromosome (GO:0000793)	4/54	0.00405745	0.0448855	6.65283	36.6385	INCENP*,HMGB1*,KIFAP3,BRD4	2	0.5	HMGB1: P09429_p_1_1, INCENP: Q9NQS7_p_7_1; Q9NQS7_p_8_1
EK	GO:0005689	U12-type spliceosomal complex (GO:0005689)	3/28	0.00453165	0.0471825	9.94992	53.6964	ZRSR2*,SF3B2,DHX15*	2	0.67	DHX15: O43143_p_3_1, ZRSR2: Q15696_p_3_1
DE	GO:0005634	nucleus (GO:0005634)	210/4484	3.17407e-19	6.91946e-17	2.31114	98.4408	MYT1*L,NOC2L,CCAR1,DCAF1*,PPP4R2,BBX,HOXA7,MNX1,SOX5,TSPYL2*,DAXX,DDX10,SOX11,DICER1,FLG2,GRWD1*,CD2BP2,CCDC82,CASZ1,SET,L3MBTL2,ANP32A,PRDM10,ZBTB4,TTBK1*,GMCL1,PRDM16,HIVEP3,HIVEP2,ZBTB7A,PPARGC1B,ZBED4,BTF3,SRPK2,BCL11A*,SETD1A,WAPL,ZBTB9,EIF5,CREBRF,ANP32E,CALR*,ANP32B,CC2D1A,BAP1,TOP2B,CSRNP3*,RSF1,WASL,PHF6*,PTMS,CHAF1A,MECOM,ARIH2,ARIH1,JARID2,ZNF367,BRD2,TIGD4,FOXD1,SIRT1,SETSIP,SLU7,PTMA…	25	0.12	CHD2: O14647_p_6_1, AKAP8: O43823_p_2_1, CDC45: O75419_p_2_1, HMGB1: P09429_p_2_1, SP100: P23497_p_6_1, CALR: P27797_p_2_1, ARID4A: P29374_p_2_1, DEK: P35659_p_1_1, MYT1: Q01538_p_2_1, TUBB3: Q13509_p_1_1, HNRNPUL2: Q1KMD3_p_2_1, ARID4B: Q4LE39_p_2_1, TTBK1: Q5TCY1_p_3_1, PHF6: Q8IWS0_p_3_1, SNIP1: Q8TAD8_p_1_1, CSRNP3: Q8WYN3_p_1_1, GRWD1: Q9BQ67_p_1_1, PCGF6: Q9BYE7_p_1_1, BCL11A: Q9H165_p_3_1,…
DE	GO:0043231	intracellular membrane-bounded organelle (GO:0043231)	228/5192	1.04383e-17	1.13777e-15	2.18404	85.3984	MYT1*L,NOC2L,CCAR1,DCAF1*,PPP4R2,BBX,HOXA7,MNX1,ANKS1B,SOX5,TSPYL2*,DAXX,DDX10,SOX11,DICER1,NISCH,FLG2,ABCA10,GRWD1*,CD2BP2,CCDC82,CASZ1,SET,L3MBTL2,ANP32A,PRDM10,ZBTB4,TTBK1*,GMCL1,PRDM16,HIVEP3,HIVEP2,ZBTB7A,PPARGC1B,ZBED4,BTF3,SRPK2,ABCA5,BCL11A*,SETD1A,WAPL,ZBTB9,EIF5,CREBRF,ANP32E,CALR*,ANP32B,CC2D1A,BAP1,TOP2B,CSRNP3*,RSF1,WASL,PHF6*,PTMS,CHAF1A,MECOM,ARIH2,ARIH1,JARID2,ZNF367,BRD2,TIGD4,FO…	26	0.11	CHD2: O14647_p_6_1, AKAP8: O43823_p_2_1, CDC45: O75419_p_2_1, HMGB1: P09429_p_2_1, SP100: P23497_p_6_1, CALR: P27797_p_2_1, ARID4A: P29374_p_2_1, DEK: P35659_p_1_1, MYT1: Q01538_p_2_1, TUBB3: Q13509_p_1_1, HNRNPUL2: Q1KMD3_p_2_1, ARID4B: Q4LE39_p_2_1, AMER1: Q5JTC6_p_1_1, TTBK1: Q5TCY1_p_3_1, PHF6: Q8IWS0_p_3_1, SNIP1: Q8TAD8_p_1_1, CSRNP3: Q8WYN3_p_1_1, GRWD1: Q9BQ67_p_1_1, PCGF6: Q9BYE7_p_1_1, …
DE	GO:0031981	nuclear lumen (GO:0031981)	56/745	2.65485e-12	1.92919e-10	3.19963	85.285	ZNF330,TOP2B,RBM28,ZNF692*,CDCA7L,HMGB2,WASHC2C,CHD3,NOC2L,PHF6*,WDR43,WASHC2A,UBTF,MNX1,PELP1*,TSPYL2*,NOM1,RPS9,PBRM1,PPP1R12A,NGDN,SIRT1,SENP3,UTP18*,RBL2,MYCN,NCL,KAT6A,GRWD1*,HAP1*,MCM2,GTF3C1,HOMEZ,GTF3C3,MAK16,NOP2,AKAP8*,NOLC1,SPTY2D1,WRN,NACC2,PES1*,BMS1,ZC3H14,SRPK2,RSPH4A,NPM1,TRIM41,NPM2,UTP3,BYSL,MPHOSPH10,ANP32B,ERCC6,TAF5,TAF1	9	0.16	PES1: O00541_p_1_1, AKAP8: O43823_p_2_1, HAP1: P54257_p_2_1, PHF6: Q8IWS0_p_3_1, PELP1: Q8IZL8_p_6_1, GRWD1: Q9BQ67_p_1_1, ZNF692: Q9BU19_p_2_1, TSPYL2: Q9H2G4_p_3_1, UTP18: Q9Y5J1_p_5_1
DE	GO:0005730	nucleolus (GO:0005730)	55/733	4.53255e-12	2.47024e-10	3.18866	83.2871	ZNF330,TOP2B,RBM28,ZNF692*,CDCA7L,HMGB2,WASHC2C,CHD3,NOC2L,PHF6*,WDR43,WASHC2A,UBTF,MNX1,PELP1*,TSPYL2*,NOM1,RPS9,PPP1R12A,NGDN,SIRT1,SENP3,UTP18*,RBL2,MYCN,NCL,KAT6A,GRWD1*,HAP1*,MCM2,GTF3C1,HOMEZ,GTF3C3,MAK16,NOP2,AKAP8*,NOLC1,SPTY2D1,WRN,NACC2,PES1*,BMS1,ZC3H14,SRPK2,RSPH4A,NPM1,TRIM41,NPM2,UTP3,BYSL,MPHOSPH10,ANP32B,ERCC6,TAF5,TAF1	9	0.16	PES1: O00541_p_1_1, AKAP8: O43823_p_2_1, HAP1: P54257_p_2_1, PHF6: Q8IWS0_p_3_1, PELP1: Q8IZL8_p_6_1, GRWD1: Q9BQ67_p_1_1, ZNF692: Q9BU19_p_2_1, TSPYL2: Q9H2G4_p_3_1, UTP18: Q9Y5J1_p_5_1
DE	GO:0043232	intracellular non-membrane-bounded organelle (GO:0043232)	69/1158	2.77561e-10	1.21016e-08	2.50958	55.2233	ZNF330,TOP2B,RBM28,ZNF692*,CDCA7L,HP1BP3,HMGB2,WASHC2C,CHD3,NOC2L,PHF6*,WDR43,LMOD3,WASHC2A,ARHGDIB,UBTF,MNX1,PELP1*,TSPYL2*,NOM1,NUDC,RPS9,PPP1R12A,NGDN,SIRT1,SENP3,UTP18*,SETSIP,RBL2,MYCL,MYCN,CDC42EP4,NCL,KAT6A,GRWD1*,HAP1*,TNIK,MCM2,GTF3C1,HOMEZ,GTF3C3,SET,MAK16,NOP2,AKAP8*,NOLC1,SPTY2D1,CENPB,WRN,CALD1*,RAD21*,NACC2,PES1*,BMS1,ZC3H14,SRPK2,RSPH4A,NPM1,TRIM41,NPM2,UTP3,WAPL,BYSL,UVSSA,MPHOSPH…	11	0.16	PES1: O00541_p_1_1, AKAP8: O43823_p_2_1, RAD21: O60216_p_3_1, HAP1: P54257_p_2_1, CALD1: Q05682_p_1_1, PHF6: Q8IWS0_p_3_1, PELP1: Q8IZL8_p_6_1, GRWD1: Q9BQ67_p_1_1, ZNF692: Q9BU19_p_2_1, TSPYL2: Q9H2G4_p_3_1, UTP18: Q9Y5J1_p_5_1
DE	GO:0005669	transcription factor TFIID complex (GO:0005669)	8/31	1.10915e-06	4.02991e-05	12.8822	176.639	TAF7L,GTF2A1,ERCC3,TAF1L,TAF5,GTF2F1,GTF2E1,TAF1	0	0
DE	GO:0005694	chromosome (GO:0005694)	17/160	1.36574e-06	4.25329e-05	4.45205	60.1197	PBRM1,HP1BP3,HMGB2,HMGB1*,NOC2L,WAPL,CENPB,BYSL,RBL2,MYCL,WRN,NCL,RAD21*,UVSSA,BMS1,PES1*,MPHOSPH10	3	0.18	PES1: O00541_p_1_1, RAD21: O60216_p_3_1, HMGB1: P09429_p_2_1
DE	GO:0070776	MOZ/MORF histone acetyltransferase complex (GO:0070776)	4/8	3.20614e-05	0.000873674	36.7921	380.719	BRPF1,KAT6B,KAT6A,PHF14	0	0
DE	GO:0070775	H3 histone acetyltransferase complex (GO:0070775)	4/9	5.64937e-05	0.0013684	29.4321	287.887	BRPF1,KAT6B,KAT6A,PHF14	0	0
DE	GO:0000127	transcription factor TFIIIC complex (GO:0000127)	3/6	0.000354487	0.00772781	36.7245	291.77	GTF3C1,GTF3C3,GTF3C5	0	0
DE	GO:0071339	MLL1 complex (GO:0071339)	5/26	0.000545694	0.00991344	8.76894	65.885	LAS1L,CHD8,SENP3,PELP1*,TAF1	1	0.2	PELP1: Q8IZL8_p_6_1
DE	GO:0044665	MLL1/2 complex (GO:0044665)	5/26	0.000545694	0.00991344	8.76894	65.885	LAS1L,CHD8,SENP3,PELP1*,TAF1	1	0.2	PELP1: Q8IZL8_p_6_1
DE	GO:0030687	preribosome, large subunit precursor (GO:0030687)	4/23	0.00295193	0.0495017	7.73973	45.0862	LAS1L,PES1*,MAK16,NOC2L	1	0.25	PES1: O00541_p_1_1
AE	GO:0032982	myosin filament (GO:0032982)	3/6	8.63258e-06	0.00124309	132.293	1542.54	MYH14*,MYH9*,MYH10*	3	1	MYH9: P35579_p_2_1, MYH10: P35580_p_4_1, MYH14: Q7Z406_p_2_1; Q7Z406_p_5_1
AE	GO:0005637	nuclear inner membrane (GO:0005637)	4/28	5.84317e-05	0.00420709	22.1734	216.138	ATP1B4*,MATR3*,LEMD3,SIRT1*	3	0.75	MATR3: P43243_p_1_1, SIRT1: Q96EB6_p_1_1; Q96EB6_p_4_1, ATP1B4: Q9UN42_p_1_1
AE	GO:0005634	nucleus (GO:0005634)	55/4484	9.3919e-05	0.00450811	1.9537	18.1169	CREBZF*,ZBTB21,HNRNPU,HOXC11,HOXA11,CCAR1,MED17,RGS3,CCND1*,SALL3,TNKS1BP1,SOX9,MEN1,UPF2*,DAXX,ZHX3,TUBB*,ARID1A,MYT1*,SIRT1*,UTP18*,NCOR2,KAT6A,ZNF316,MYH9*,MATR3*,HECA,HDGFL1*,HOXB7,RBM22,CASZ1,DDX23*,PPM1E,TTBK1*,HSP90B1,RECQL4,PCNP,EIF1AD,TFPT*,SBNO2,NTHL1,TLDC2,MYH10*,SRPK2,EVX2,ARID3C,NAP1L5*,CTCFL,TDP2,SP3,ACIN1,PRPF31*,ERCC6,ZNF653,FAM50A*	17	0.31	TUBB: P07437_p_1_1, TFPT: P0C1Z6_p_1_1, CCND1: P24385_p_1_1, MYH9: P35579_p_2_1, MYH10: P35580_p_4_1, MATR3: P43243_p_1_1, MYT1: Q01538_p_3_1, FAM50A: Q14320_p_2_1, TTBK1: Q5TCY1_p_4_1, HDGFL1: Q5TGJ6_p_1_1, PRPF31: Q8WWY3_p_1_1, SIRT1: Q96EB6_p_1_1; Q96EB6_p_4_1, NAP1L5: Q96NT1_p_3_1, DDX23: Q9BUQ8_p_3_1, UPF2: Q9HAU5_p_2_1, CREBZF: Q9NS37_p_2_1, UTP18: Q9Y5J1_p_2_1
AE	GO:0043231	intracellular membrane-bounded organelle (GO:0043231)	59/5192	0.000405258	0.0145893	1.79922	14.0537	CREBZF*,ZBTB21,HNRNPU,HOXC11,HOXA11,CCAR1,MED17,RGS3,ZFYVE27,CCND1*,SALL3,TNKS1BP1,SOX9,MEN1,UPF2*,DAXX,ZHX3,TUBB*,ARID1A,MYT1*,SIRT1*,UTP18*,NCOR2,VGF*,KAT6A,ZNF316,MYH9*,MATR3*,HECA,HDGFL1*,HOXB7,RBM22,CASZ1,AKNA,DDX23*,PPM1E,TTBK1*,HSP90B1,RECQL4,PCNP,EIF1AD,TFPT*,SBNO2,NTHL1,TLDC2,MYH10*,SNX8*,SRPK2,EVX2,ARID3C,NAP1L5*,CTCFL,TDP2,SP3,ACIN1,PRPF31*,ERCC6,ZNF653,FAM50A*	19	0.32	VGF: O15240_p_2_1; O15240_p_7_1, TUBB: P07437_p_1_1, TFPT: P0C1Z6_p_1_1, CCND1: P24385_p_1_1, MYH9: P35579_p_2_1, MYH10: P35580_p_4_1, MATR3: P43243_p_1_1, MYT1: Q01538_p_3_1, FAM50A: Q14320_p_2_1, TTBK1: Q5TCY1_p_4_1, HDGFL1: Q5TGJ6_p_1_1, PRPF31: Q8WWY3_p_1_1, SIRT1: Q96EB6_p_1_1; Q96EB6_p_4_1, NAP1L5: Q96NT1_p_3_1, DDX23: Q9BUQ8_p_3_1, UPF2: Q9HAU5_p_2_1, CREBZF: Q9NS37_p_2_1, UTP18: Q9Y5J1_p_…
AE	GO:0005641	nuclear envelope lumen (GO:0005641)	2/6	0.00085471	0.0246156	65.7053	464.191	TUBB*,CCAR1	1	0.5	TUBB: P07437_p_1_1
KR	GO:0005634	nucleus (GO:0005634)	68/4484	1.31741e-10	1.08028e-08	3.00895	68.4543	KDM5A,SETD5*,USP36,LDB1,ZC3H4*,EHMT2,CHD8,RRP1,FOXI1,NKAP,CHD5,RSF1,LDB2,CHD3,GPATCH8,HMGB4,LSM11,DHX16,CIR1,NKX2-8,SRRM4,IK*,SFMBT1,SFMBT2,FOXH1,WDR74,FOXL1,TOPORS,JMJD6,NCOR2,INCENP*,ZNF639,MCM3,PHIP*,ANKRD17*,L3MBTL1,SP100,INO80D,USP10,SP140,LEF1,EXOSC9,MKNK1,BRD7,NKX2-2,ZNF541,TRMT10A*,TCF7L2,TCF7L1*,POU2F1,ZNF804A,INO80,RRP1B,SMARCA2*,PNRC1,GON4L,MYBBP1A,PHF13,GTF2IRD1,BUD13,SP140L,BRWD1,LPI…	9	0.13	ANKRD17: O75179_p_6_1, SMARCA2: P51531_p_3_1; P51531_p_6_1, IK: Q13123_p_1_1, TRMT10A: Q8TBZ6_p_1_1, PHIP: Q8WWQ0_p_3_1, SETD5: Q9C0A6_p_2_1, TCF7L1: Q9HCS4_p_4_1, INCENP: Q9NQS7_p_1_1, ZC3H4: Q9UPT8_p_2_1
KR	GO:0031981	nuclear lumen (GO:0031981)	24/745	1.06838e-09	4.38035e-08	5.17763	106.955	L3MBTL1,USP36,TRMT10A*,IK*,NIFK,POP1,PRKRIP1*,RRP1,UTP23,FOXI1,WDR74,NOL8*,LDB2,CHD3,RRP1B,JMJD6,TAF1D*,MYBBP1A,EXOSC9,MCM3,SURF6*,ZCCHC4,BRWD1,RBM34	6	0.25	SURF6: O75683_p_1_1; O75683_p_2_1, IK: Q13123_p_1_1, NOL8: Q76FK4_p_4_1, TRMT10A: Q8TBZ6_p_1_1, TAF1D: Q9H5J8_p_2_1, PRKRIP1: Q9H875_p_1_1
KR	GO:0005730	nucleolus (GO:0005730)	23/733	4.08271e-09	9.43862e-08	5.00101	96.6021	L3MBTL1,USP36,TRMT10A*,NIFK,POP1,PRKRIP1*,RRP1,UTP23,FOXI1,WDR74,NOL8*,LDB2,CHD3,RRP1B,JMJD6,TAF1D*,MYBBP1A,EXOSC9,MCM3,SURF6*,ZCCHC4,BRWD1,RBM34	5	0.22	SURF6: O75683_p_1_1; O75683_p_2_1, NOL8: Q76FK4_p_4_1, TRMT10A: Q8TBZ6_p_1_1, TAF1D: Q9H5J8_p_2_1, PRKRIP1: Q9H875_p_1_1
KR	GO:0043231	intracellular membrane-bounded organelle (GO:0043231)	71/5192	4.60421e-09	9.43862e-08	2.68752	51.5904	KDM5A,SETD5*,USP36,LDB1,ZC3H4*,EHMT2,CHD8,RRP1,FOXI1,NKAP,CHD5,RSF1,LDB2,CHD3,GPATCH8,HMGB4,LSM11,DHX16,CIR1,NKX2-8,SRRM4,IK*,SFMBT1,SFMBT2,FOXH1,WDR74,FOXL1,TOPORS,JMJD6,NCOR2,SMO*,VGF*,INCENP*,ZNF639,MCM3,PHIP*,ANKRD17*,L3MBTL1,SP100,INO80D,USP10,SP140,LEF1,EXOSC9,MKNK1,BRD7,NKX2-2,ZNF541,TRMT10A*,TCF7L2,TCF7L1*,POU2F1,ZNF804A,INO80,RRP1B,SMARCA2*,PNRC1,GON4L,MYBBP1A,PHF13,GTF2IRD1,BUD13,SP140L…	11	0.15	VGF: O15240_p_5_1, ANKRD17: O75179_p_6_1, SMARCA2: P51531_p_3_1; P51531_p_6_1, IK: Q13123_p_1_1, TRMT10A: Q8TBZ6_p_1_1, PHIP: Q8WWQ0_p_3_1, SMO: Q99835_p_2_1, SETD5: Q9C0A6_p_2_1, TCF7L1: Q9HCS4_p_4_1, INCENP: Q9NQS7_p_1_1, ZC3H4: Q9UPT8_p_2_1
KR	GO:0005694	chromosome (GO:0005694)	10/160	3.00491e-07	4.92806e-06	9.58783	143.989	L3MBTL1,IK*,NIFK,INCENP*,EXOSC9,RRP1,SURF6*,NOL8*,RRP1B,RBM34	4	0.4	SURF6: O75683_p_1_1; O75683_p_2_1, IK: Q13123_p_1_1, NOL8: Q76FK4_p_4_1, INCENP: Q9NQS7_p_1_1
KR	GO:1990907	beta-catenin-TCF complex (GO:1990907)	4/13	1.90227e-06	2.59977e-05	61.6752	812.414	TCF7L2,TCF7L1*,LDB1,LEF1	1	0.25	TCF7L1: Q9HCS4_p_4_1
KR	GO:0043232	intracellular non-membrane-bounded organelle (GO:0043232)	24/1158	3.84352e-06	4.50241e-05	3.22089	40.1617	L3MBTL1,USP36,TRMT10A*,NIFK,POP1,PRKRIP1*,RRP1,UTP23,FOXI1,WDR74,NOL8*,LDB2,CHD3,RRP1B,JMJD6,TAF1D*,MYBBP1A,INCENP*,EXOSC9,MCM3,SURF6*,ZCCHC4,BRWD1,RBM34	6	0.25	SURF6: O75683_p_1_1; O75683_p_2_1, NOL8: Q76FK4_p_4_1, TRMT10A: Q8TBZ6_p_1_1, TAF1D: Q9H5J8_p_2_1, PRKRIP1: Q9H875_p_1_1, INCENP: Q9NQS7_p_1_1
KR	GO:0001518	voltage-gated sodium channel complex (GO:0001518)	4/17	6.18875e-06	6.34347e-05	42.6896	511.967	SCN8A,SCN2A,SCN3A,SCN1A*	1	0.25	SCN1A: P35498_p_4_1
KR	GO:0034706	sodium channel complex (GO:0034706)	4/25	3.14236e-05	0.000286304	26.4163	273.882	SCN8A,SCN2A,SCN3A,SCN1A*	1	0.25	SCN1A: P35498_p_4_1
KR	GO:0000228	nuclear chromosome (GO:0000228)	5/83	0.000367	0.0030094	8.92696	70.6136	IK*,NIFK,EXOSC9,MCM3,INO80	1	0.2	IK: Q13123_p_1_1
KR	GO:0030687	preribosome, large subunit precursor (GO:0030687)	3/23	0.000618483	0.00461051	20.6594	152.636	RRP1,WDR74,RRP1B	0	0
KR	GO:0071005	U2-type precatalytic spliceosome (GO:0071005)	3/50	0.00592331	0.0404759	8.77926	45.0276	IK*,DHX16,BUD13	1	0.33	IK: Q13123_p_1_1
KR	GO:0071011	precatalytic spliceosome (GO:0071011)	3/52	0.00660803	0.0416814	8.42007	42.2643	IK*,DHX16,BUD13	1	0.33	IK: Q13123_p_1_1
KR	GO:0000793	condensed chromosome (GO:0000793)	3/54	0.00733797	0.0429795	8.08905	39.7552	L3MBTL1,NIFK,INCENP*	1	0.33	INCENP: Q9NQS7_p_1_1
AK	GO:0000137	Golgi cis cisterna (GO:0000137)	14/25	8.52874e-29	5.71426e-27	429.621	27767.1	GOLGA8R*,GOLGA8T*,GOLGA8J*,GOLGA8M*,GOLGA8O*,GOLGA8N*,GOLGA8Q*,GOLGA2*,GOLGA6A*,GOLGA8B*,GOLGA6C*,GOLGA6B*,GOLGA6D*,GOLGA8H*	14	1	GOLGA8O: A6NCC3_p_1_1, GOLGA6C: A6NDK9_p_1_1, GOLGA6B: A6NDN3_p_1_1, GOLGA8J: A6NMD2_p_1_1, GOLGA8B: A8MQT2_p_1_1, GOLGA8N: F8WBI6_p_1_1, GOLGA8T: H3BQL2_p_1_1, GOLGA8M: H3BSY2_p_1_1, GOLGA8Q: H3BV12_p_1_1, GOLGA8R: I6L899_p_1_1, GOLGA6D: P0CG33_p_1_1, GOLGA8H: P0CJ92_p_1_1, GOLGA2: Q08379_p_1_1, GOLGA6A: Q9NYA3_p_1_1
AK	GO:0032580	Golgi cisterna membrane (GO:0032580)	14/26	1.84289e-28	6.17367e-27	393.799	25148.4	GOLGA8R*,GOLGA8T*,GOLGA8J*,GOLGA8M*,GOLGA8O*,GOLGA8N*,GOLGA8Q*,GOLGA2*,GOLGA6A*,GOLGA8B*,GOLGA6C*,GOLGA6B*,GOLGA6D*,GOLGA8H*	14	1	GOLGA8O: A6NCC3_p_1_1, GOLGA6C: A6NDK9_p_1_1, GOLGA6B: A6NDN3_p_1_1, GOLGA8J: A6NMD2_p_1_1, GOLGA8B: A8MQT2_p_1_1, GOLGA8N: F8WBI6_p_1_1, GOLGA8T: H3BQL2_p_1_1, GOLGA8M: H3BSY2_p_1_1, GOLGA8Q: H3BV12_p_1_1, GOLGA8R: I6L899_p_1_1, GOLGA6D: P0CG33_p_1_1, GOLGA8H: P0CJ92_p_1_1, GOLGA2: Q08379_p_1_1, GOLGA6A: Q9NYA3_p_1_1
AK	GO:0031985	Golgi cisterna (GO:0031985)	14/53	4.26059e-23	9.51532e-22	121.005	6232.96	GOLGA8R*,GOLGA8T*,GOLGA8J*,GOLGA8M*,GOLGA8O*,GOLGA8N*,GOLGA8Q*,GOLGA2*,GOLGA6A*,GOLGA8B*,GOLGA6C*,GOLGA6B*,GOLGA6D*,GOLGA8H*	14	1	GOLGA8O: A6NCC3_p_1_1, GOLGA6C: A6NDK9_p_1_1, GOLGA6B: A6NDN3_p_1_1, GOLGA8J: A6NMD2_p_1_1, GOLGA8B: A8MQT2_p_1_1, GOLGA8N: F8WBI6_p_1_1, GOLGA8T: H3BQL2_p_1_1, GOLGA8M: H3BSY2_p_1_1, GOLGA8Q: H3BV12_p_1_1, GOLGA8R: I6L899_p_1_1, GOLGA6D: P0CG33_p_1_1, GOLGA8H: P0CJ92_p_1_1, GOLGA2: Q08379_p_1_1, GOLGA6A: Q9NYA3_p_1_1
AK	GO:0005801	cis-Golgi network (GO:0005801)	14/57	1.34881e-22	2.25926e-21	109.726	5525.57	GOLGA8R*,GOLGA8T*,GOLGA8J*,GOLGA8M*,GOLGA8O*,GOLGA8N*,GOLGA8Q*,GOLGA2*,GOLGA6A*,GOLGA8B*,GOLGA6C*,GOLGA6B*,GOLGA6D*,GOLGA8H*	14	1	GOLGA8O: A6NCC3_p_1_1, GOLGA6C: A6NDK9_p_1_1, GOLGA6B: A6NDN3_p_1_1, GOLGA8J: A6NMD2_p_1_1, GOLGA8B: A8MQT2_p_1_1, GOLGA8N: F8WBI6_p_1_1, GOLGA8T: H3BQL2_p_1_1, GOLGA8M: H3BSY2_p_1_1, GOLGA8Q: H3BV12_p_1_1, GOLGA8R: I6L899_p_1_1, GOLGA6D: P0CG33_p_1_1, GOLGA8H: P0CJ92_p_1_1, GOLGA2: Q08379_p_1_1, GOLGA6A: Q9NYA3_p_1_1
AK	GO:0000139	Golgi membrane (GO:0000139)	14/472	1.42207e-09	1.90558e-08	10.0868	205.48	GOLGA8R*,GOLGA8T*,GOLGA8J*,GOLGA8M*,GOLGA8O*,GOLGA8N*,GOLGA8Q*,GOLGA2*,GOLGA6A*,GOLGA8B*,GOLGA6C*,GOLGA6B*,GOLGA6D*,GOLGA8H*	14	1	GOLGA8O: A6NCC3_p_1_1, GOLGA6C: A6NDK9_p_1_1, GOLGA6B: A6NDN3_p_1_1, GOLGA8J: A6NMD2_p_1_1, GOLGA8B: A8MQT2_p_1_1, GOLGA8N: F8WBI6_p_1_1, GOLGA8T: H3BQL2_p_1_1, GOLGA8M: H3BSY2_p_1_1, GOLGA8Q: H3BV12_p_1_1, GOLGA8R: I6L899_p_1_1, GOLGA6D: P0CG33_p_1_1, GOLGA8H: P0CJ92_p_1_1, GOLGA2: Q08379_p_1_1, GOLGA6A: Q9NYA3_p_1_1
AK	GO:0043231	intracellular membrane-bounded organelle (GO:0043231)	39/5192	5.22037e-07	5.82941e-06	3.2887	47.5727	KDM1A*,NKAP*,FOXO3,H1-10,FOXO1,GOLGA2*,PSMD1*,RRP12,CCNL2,HMGN1,KDM6B,GOLGA8R*,H2AZ2,GOLGA8T*,BRPF1*,PHC1,DCLK3,GOLGA8J*,GOLGA8M*,GOLGA8O*,GTF2F1,GOLGA8N*,GOLGA8Q*,H1-3,H1-2,H1-5,GOLGA6A*,GOLGA8B*,H1-4,GOLGA6C*,GOLGA6B*,INCENP*,GOLGA6D*,GOLGA8H*,MATR3,ADNP,CDK13*,MPHOSPH8,RABL6	20	0.51	GOLGA8O: A6NCC3_p_1_1, GOLGA6C: A6NDK9_p_1_1, GOLGA6B: A6NDN3_p_1_1, GOLGA8J: A6NMD2_p_1_1, GOLGA8B: A8MQT2_p_1_1, GOLGA8N: F8WBI6_p_1_1, GOLGA8T: H3BQL2_p_1_1, GOLGA8M: H3BSY2_p_1_1, GOLGA8Q: H3BV12_p_1_1, GOLGA8R: I6L899_p_1_1, KDM1A: O60341_p_1_1, GOLGA6D: P0CG33_p_1_1, GOLGA8H: P0CJ92_p_1_1, BRPF1: P55201_p_4_1, GOLGA2: Q08379_p_1_1, CDK13: Q14004_p_11_1, NKAP: Q8N5F7_p_9_1, PSMD1: Q99460_p_2…
AK	GO:0005730	nucleolus (GO:0005730)	9/733	0.00135516	0.0126956	3.72986	24.6314	NOP58,TCOF1,CCDC137*,PES1*,BMS1*,NOLC1,RRP12,MPHOSPH8,H1-10	3	0.33	PES1: O00541_p_2_1, BMS1: Q14692_p_1_1, CCDC137: Q6PK04_p_1_1
AK	GO:0031981	nuclear lumen (GO:0031981)	9/745	0.0015159	0.0126956	3.66676	23.8037	NOP58,TCOF1,CCDC137*,PES1*,BMS1*,NOLC1,RRP12,MPHOSPH8,H1-10	3	0.33	PES1: O00541_p_2_1, BMS1: Q14692_p_1_1, CCDC137: Q6PK04_p_1_1
AK	GO:0005694	chromosome (GO:0005694)	4/160	0.00279724	0.0208239	7.34708	43.1944	INCENP*,CCDC137*,PES1*,BMS1*	4	1	PES1: O00541_p_2_1, BMS1: Q14692_p_1_1, CCDC137: Q6PK04_p_1_1, INCENP: Q9NQS7_p_4_1
KQ	GO:0043231	intracellular membrane-bounded organelle (GO:0043231)	23/5192	0.000109011	0.00534154	3.29004	30.0185	TUB*,RNF10,SF3B2*,CDX1*,NEXMIF*,LOXL3,PASD1,TCF20,SMG7*,CHD1*,GNL1*,LSM4,SHROOM4*,NCOR2*,ATXN3*,GOLGA8B*,ARGFX*,DIAPH2*,ZNF207*,PDE4B,UBAP2L,PHIP,SERF2*	15	0.65	ARGFX: A6NJG6_p_1_1, GOLGA8B: A8MQT2_p_3_1, CHD1: O14646_p_3_1, ZNF207: O43670_p_1_1, DIAPH2: O60879_p_6_1, GNL1: P36915_p_1_1, CDX1: P47902_p_6_1, TUB: P50607_p_1_1, ATXN3: P54252_p_2_1, SERF2: P84101_p_1_1, SF3B2: Q13435_p_7_1, NEXMIF: Q5QGS0_p_3_1, SMG7: Q92540_p_1_1, SHROOM4: Q9ULL8_p_1_1, NCOR2: Q9Y618_p_2_1
KQ	GO:0005634	nucleus (GO:0005634)	20/4484	0.000408528	0.0100089	3.01796	23.549	TUB*,RNF10,SF3B2*,CDX1*,NEXMIF*,LOXL3,PASD1,TCF20,SMG7*,CHD1*,GNL1*,LSM4,NCOR2*,ATXN3*,ARGFX*,ZNF207*,PDE4B,UBAP2L,PHIP,SERF2*	12	0.6	ARGFX: A6NJG6_p_1_1, CHD1: O14646_p_3_1, ZNF207: O43670_p_1_1, GNL1: P36915_p_1_1, CDX1: P47902_p_6_1, TUB: P50607_p_1_1, ATXN3: P54252_p_2_1, SERF2: P84101_p_1_1, SF3B2: Q13435_p_7_1, NEXMIF: Q5QGS0_p_3_1, SMG7: Q92540_p_1_1, NCOR2: Q9Y618_p_2_1
KQ	GO:0005891	voltage-gated calcium channel complex (GO:0005891)	2/31	0.00201804	0.0329614	33.5206	208.016	CACNB3,PDE4B	0	0
KQ	GO:0034704	calcium channel complex (GO:0034704)	2/45	0.0042154	0.0391483	22.591	123.551	CACNB3,PDE4B	0	0
KQ	GO:0071005	U2-type precatalytic spliceosome (GO:0071005)	2/50	0.00518069	0.0391483	20.2327	106.481	SF3B2*,LSM4	1	0.5	SF3B2: Q13435_p_7_1
KQ	GO:0097525	spliceosomal snRNP complex (GO:0097525)	2/51	0.00538483	0.0391483	19.8188	103.537	SF3B2*,LSM4	1	0.5	SF3B2: Q13435_p_7_1
KQ	GO:0071011	precatalytic spliceosome (GO:0071011)	2/52	0.00559262	0.0391483	19.4215	100.726	SF3B2*,LSM4	1	0.5	SF3B2: Q13435_p_7_1
KQ	GO:0005840	ribosome (GO:0005840)	2/62	0.00786806	0.0481919	16.1764	78.3739	DNAJC21,EIF3H*	1	0.5	EIF3H: O15372_p_3_1
ES	GO:0005730	nucleolus (GO:0005730)	29/733	1.4832e-07	1.29162e-05	3.33612	52.4568	L3MBTL1,MAK16,NOLC1,NOL8,WASHC2C,SIX1,NOC2L,AATF,WDR43,WASHC2A,COIL,HIRIP3,TCOF1,BMS1,DHX37,UBTF,UTP14A,RBM19,ZFP91,GNL2,NPM3,FTSJ3,MYBBP1A,DKC1,KAT6A,RARA,NOL10,BRWD1,KDM7A	0	0
ES	GO:0031981	nuclear lumen (GO:0031981)	29/745	2.08326e-07	1.29162e-05	3.27814	50.4315	L3MBTL1,MAK16,NOLC1,NOL8,WASHC2C,SIX1,NOC2L,AATF,WDR43,WASHC2A,COIL,HIRIP3,TCOF1,BMS1,DHX37,UBTF,UTP14A,RBM19,ZFP91,GNL2,NPM3,FTSJ3,MYBBP1A,DKC1,KAT6A,RARA,NOL10,BRWD1,KDM7A	0	0
ES	GO:0043231	intracellular membrane-bounded organelle (GO:0043231)	104/5192	1.0636e-06	4.39622e-05	1.87131	25.7376	ATF1,STH,ATN1,ARID4A*,WASHC2C,ARID4B,NOC2L,WASHC2A,CWC22,FAM53C,NEK1,CIR1,TMPO*,CADPS2,GTF2F1,PUS7,CDC25B,KIAA1614,BRMS1,DKC1,KAT6B,KAT6A,ZNF438,TNIK,HDGFL2,DGKH,L3MBTL1,CSF1R,MAX,ANKRD11,RNPC3,TTBK1,MBTD1,EIF1AD,WDR70,TP53BP1,EIF2B5,CREBBP,PRPF38A*,ZFHX2,BTBD18,CBX2,SETD1A,MICAL3,HMGA1,SMARCA2,L1TD1,BRWD1,ZNF652,THRA,BNC2,FBH1,RPLP0,SIX1,MIA3,RSF1,ZC3H6,AATF,CHD2,AFF3,CHD1,COIL,FLCN*,SNAPC4,UBTF…	6	0.06	BRD2: P25440_p_8_1, ARID4A: P29374_p_1_1, TMPO: P42166_p_3_1, GSC: P56915_p_1_1, PRPF38A: Q8NAV1_p_1_1, FLCN: Q8NFG4_p_2_1
ES	GO:0071005	U2-type precatalytic spliceosome (GO:0071005)	7/50	3.96734e-06	9.20386e-05	12.4741	155.145	SF3A3,SF3B2,RNF113A,PRPF38A*,MFAP1,CWC22,DHX16	1	0.14	PRPF38A: Q8NAV1_p_1_1
ES	GO:0043232	intracellular non-membrane-bounded organelle (GO:0043232)	35/1158	4.09529e-06	9.20386e-05	2.5332	31.426	L3MBTL1,KANK1,CTDP1,MAK16,NOLC1,NOL8,WASHC2C,SIX1,NOC2L,AATF,WDR43,CENPB,WASHC2A,COIL,HIRIP3,TCOF1,EPB41L2,BMS1,DHX37,UBTF,UTP14A,RBM19,EIF2AK2,ZFP91,GNL2,NPM3,FTSJ3,MYBBP1A,DKC1,KAT6A,RARA,NOL10,TNIK,BRWD1,KDM7A	0	0
ES	GO:0005634	nucleus (GO:0005634)	91/4484	4.59812e-06	9.20386e-05	1.83715	22.5783	ATF1,THRA,BNC2,FBH1,STH,RPLP0,ATN1,ARID4A*,SIX1,RSF1,ARID4B,ZC3H6,NOC2L,AATF,CHD2,AFF3,CHD1,COIL,FLCN*,CWC22,SNAPC4,FAM53C,UBTF,DHX16,NEK1,CIR1,CYREN,TMPO*,BRD2*,ZFP91,GNL2,GTF2F1,PUS7,ETV3,CDC25B,KIAA1614,BRMS1,DKC1,KAT6B,KAT6A,RARA,ZNF438,BMP2K,TNIK,EAPP,HDGFL2,HMX2,KDM7A,L3MBTL1,SP100,SF3B2,CTDP1,ZBTB47,MAX,ANKRD11,ZBTB42,RNPC3,TTBK1,CENPB,MBTD1,EIF1AD,RNF113A,HIRIP3,WDR70,GSC*,DROSHA,TP53BP1,…	6	0.07	BRD2: P25440_p_8_1, ARID4A: P29374_p_1_1, TMPO: P42166_p_3_1, GSC: P56915_p_1_1, PRPF38A: Q8NAV1_p_1_1, FLCN: Q8NFG4_p_2_1
ES	GO:0071011	precatalytic spliceosome (GO:0071011)	7/52	5.19573e-06	9.20386e-05	11.9185	145.02	SF3A3,SF3B2,RNF113A,PRPF38A*,MFAP1,CWC22,DHX16	1	0.14	PRPF38A: Q8NAV1_p_1_1
ES	GO:0005684	U2-type spliceosomal complex (GO:0005684)	8/89	2.32628e-05	0.000360574	7.58295	80.8998	SF3A3,SF3B2,RNF113A,PRPF38A*,MFAP1,CWC22,DHX16,PRPF40B	1	0.12	PRPF38A: Q8NAV1_p_1_1
ES	GO:0001518	voltage-gated sodium channel complex (GO:0001518)	3/17	0.00134824	0.0185758	16.1921	107.013	SCN9A,CACNA1G,SCN1A	0	0
ES	GO:0030687	preribosome, large subunit precursor (GO:0030687)	3/23	0.00331219	0.0393327	11.331	64.7019	MAK16,NOC2L,FTSJ3	0	0
ES	GO:0048788	cytoskeleton of presynaptic active zone (GO:0048788)	2/7	0.00348919	0.0393327	30.1237	170.442	RIMS2,RIMS1	0	0
ES	GO:0034706	sodium channel complex (GO:0034706)	3/25	0.00421883	0.0435946	10.2999	56.3219	SCN9A,CACNA1G,SCN1A	0	0
ES	GO:0070776	MOZ/MORF histone acetyltransferase complex (GO:0070776)	2/8	0.00461185	0.0439899	25.1018	135.026	KAT6B,KAT6A	0	0
