# Supplementary material for: One Step Closer to the Understanding of the Relationship IDR-LCR-Structure
Source: Genes (Basel). 2023 Aug 28;14(9):1711. doi: 10.3390/genes14091711 (PMC10531472; doi:10.3390/genes14091711)
Supplement: Supplementary file 1 [file genes-14-01711-s001.zip › SupplTable_S6.xlsx]

## Sheet: BP
poly type	GO id	GO term	Overlap	p-value	adj p-value	odds ratio	combined score	enriched genes	count genes helix	fraction genes helix	enriched genes helix
PolyP	GO:0006357	regulation of transcription by RNA polymerase II (GO:0006357)	96/2206	6.1377e-18	1.13732e-14	3.16714	125.52	RB1,HMX3,BARHL2,CCNK,CRTC1,ONECUT3,PRDM6,AKAP8L,RAX,ATN1,SCX,MED19,TCF20,FASLG,WASL,NR3C2,IRF2BPL,PPP3CB,SALL2,DMRTB1,ZNF526,PITX1,PELP1,DDX17,HES7,KDM6B,ZBTB39,SMARCC1,SMARCC2,EN1,RFX1,POU3F1,ARID1A,POU3F2,POU3F3,KLF16,NR5A1,KAT6A,HOXB4,ERF,HOXB2,ZFPM1,CEBPA,CEBPB,NOTCH1,NUFIP1,TNKS,FOXG1,SATB2,ARX,MAZ,WAS,FOXK1,NEUROD2,ZNF827,GBX2,GBX1,ATOH8,HES1,ZBTB7B,NKX2-4,BRD4,BCL9L,FOXB2,TBX1,ZNF462,EGR2,…	0	0
PolyP	GO:0045893	positive regulation of transcription, DNA-templated (GO:0045893)	58/1183	6.75493e-13	6.25844e-10	3.29369	92.3001	CCNK,CRTC1,AKAP8L,RAX,SCX,MED19,TCF20,WASL,IRF2BPL,PPP3CB,SALL2,PELP1,DDX17,KDM6B,ARHGEF11,SMARCC1,SMARCC2,POU3F1,ARID1A,POU3F2,POU3F3,NR5A1,KAT6A,ZNF318,HOXB4,HOXB2,ZFPM1,KMT2E,CEBPA,CEBPB,NOTCH1,NUFIP1,MYRF,TNKS,SATB2,MAZ,WAS,FOXK1,BICRA,ZNF827,ATOH8,HES1,BRD4,BCL9L,TBX1,ZNF462,EGR2,CDX2,SMARCA5,DAB2IP,PDX1,TRERF1,KLF2,NFIA,WT1,ASXL3,HOXD3,HOXD8	0	0
PolyP	GO:0045944	positive regulation of transcription by RNA polymerase II (GO:0045944)	49/908	1.7336e-12	1.07079e-09	3.58532	97.0934	CCNK,CRTC1,AKAP8L,RAX,SCX,MED19,TCF20,WASL,IRF2BPL,PPP3CB,SALL2,PELP1,DDX17,KDM6B,POU3F2,NR5A1,KAT6A,HOXB4,HOXB2,ZFPM1,NOTCH3,CEBPA,CEBPB,NOTCH1,NUFIP1,TNKS,SATB2,WAS,ZNF827,ATOH8,HES1,BRD4,BCL9L,TBX1,ZNF462,EGR2,CDX2,SMARCA5,DAB2IP,PDX1,TRERF1,KLF2,NFIA,WT1,ASXL3,HOXD3,CDK12,CDK13,HOXD8	0	0
PolyP	GO:0006355	regulation of transcription, DNA-templated (GO:0006355)	82/2244	3.88344e-11	1.58449e-08	2.49383	59.7813	RB1,HMX3,BARHL2,CCNK,ONECUT3,RAX,SCX,TCF20,NR3C2,IRF2BPL,PPP3CB,SALL2,DMRTB1,ZNF526,PITX1,DDX17,HES7,ARHGEF11,ZBTB39,SMARCC1,SMARCC2,EN1,RFX1,POU3F1,ARID1A,POU3F2,POU3F3,KLF16,NR5A1,KAT6A,ZNF318,HOXB4,ERF,HOXB2,KMT2E,CEBPA,CEBPB,NOTCH1,MYRF,FOXG1,SATB2,ARX,MAZ,FOXK1,BICRA,NEUROD2,RBM15B,GBX2,GBX1,ZNF628,ATOH8,HES1,ZBTB7B,NKX2-4,BRD4,FOXB2,TBX1,ZNF341,EGR2,SKOR1,MYPOP,CDX2,IRX5,PRRX2,SMARCA5,DAB2I…	0	0
PolyP	GO:0008154	actin polymerization or depolymerization (GO:0008154)	12/50	4.27548e-11	1.58449e-08	18.4342	440.127	ENAH,DIAPH1,DIAPH3,ABI2,ABI1,WAS,MICAL3,COBL,EVL,WASL,WASF1,WASF3	0	0
PolyP	GO:0007015	actin filament organization (GO:0007015)	15/152	6.97043e-08	2.1527e-05	6.41645	105.737	FHOD3,LMOD1,SHROOM2,WAS,COBL,SHROOM3,WASL,LMOD2,PPP1R9B,ENAH,ABI2,ABI1,EVL,WHAMM,DBN1	0	0
PolyP	GO:0030041	actin filament polymerization (GO:0030041)	7/29	5.10346e-07	0.000135096	18.3164	265.372	DIAPH1,DIAPH3,WAS,COBL,WASL,WASF1,WASF3	0	0
PolyP	GO:0051127	positive regulation of actin nucleation (GO:0051127)	5/11	6.5697e-07	0.000152171	47.7308	679.478	ABI2,WHAMM,WASF1,WASF2,WASF3	0	0
PolyP	GO:0007010	cytoskeleton organization (GO:0007010)	12/120	1.2483e-06	0.00025701	6.46296	87.8558	FMNL3,STRIP1,DIAPH1,DIAPH3,FMNL2,MAST4,ZMYM3,ABI2,PALLD,MICAL3,RANBP9,WASF3	0	0
PolyP	GO:0048024	regulation of mRNA splicing, via spliceosome (GO:0048024)	10/90	3.72383e-06	0.000632371	7.23817	90.4826	DDX17,SRPK2,HNRNPL,ZC3H10,DAZAP1,KHDRBS2,RBM15B,KHDRBS3,HNRNPK,SF1	0	0
PolyP	GO:1903508	positive regulation of nucleic acid-templated transcription (GO:1903508)	25/511	3.75395e-06	0.000632371	3.05234	38.132	KMT2E,CEBPB,NOTCH1,MYRF,MAZ,SCX,FOXK1,BICRA,PPP3CB,ATOH8,HES1,BRD4,ARHGEF11,TBX1,SMARCC1,EGR2,SMARCC2,POU3F1,ARID1A,TRERF1,POU3F3,KLF2,WT1,KAT6A,ZNF318	0	0
PolyP	GO:2000601	positive regulation of Arp2/3 complex-mediated actin nucleation (GO:2000601)	4/8	5.96798e-06	0.000921555	57.1163	687.058	ABI2,WASF1,WASF2,WASF3	0	0
PolyP	GO:0022603	regulation of anatomical structure morphogenesis (GO:0022603)	11/123	1.02619e-05	0.00146271	5.69468	65.4152	TBX1,STRIP1,INF2,FMNL2,ZMYM3,GPNMB,CDX2,ABI2,RC3H1,SRCIN1,BCL9L	0	0
PolyP	GO:0030866	cortical actin cytoskeleton organization (GO:0030866)	5/20	1.93776e-05	0.00256477	19.0836	207.083	FHOD3,FMNL3,STRIP1,FMNL1,FMNL2	0	0
PolyP	GO:0045010	actin nucleation (GO:0045010)	5/21	2.50717e-05	0.00309719	17.8899	189.522	JMY,LMOD1,WHAMM,WASHC1,LMOD2	0	0
PolyP	GO:0038096	Fc-gamma receptor signaling pathway involved in phagocytosis (GO:0038096)	8/71	3.17665e-05	0.00367895	7.31615	75.7741	WIPF1,WIPF2,WIPF3,ABI1,WAS,WASL,DOCK1,WASF2	0	0
PolyP	GO:0038094	Fc-gamma receptor signaling pathway (GO:0038094)	8/72	3.52026e-05	0.00383709	7.20147	73.8467	WIPF1,WIPF2,WIPF3,ABI1,WAS,WASL,DOCK1,WASF2	0	0
PolyP	GO:0002431	Fc receptor mediated stimulatory signaling pathway (GO:0002431)	8/74	4.30114e-05	0.00442779	6.98253	70.2027	WIPF1,WIPF2,WIPF3,ABI1,WAS,WASL,DOCK1,WASF2	0	0
PolyP	GO:0051258	protein polymerization (GO:0051258)	7/59	7.13005e-05	0.00681127	7.73742	73.8816	DIAPH1,DIAPH3,WAS,COBL,WASL,WASF1,WASF3	0	0
PolyP	GO:0006396	RNA processing (GO:0006396)	12/179	7.35161e-05	0.00681127	4.16702	39.6618	DDX17,SRPK2,HNRNPL,SF3B2,HNRNPK,NUFIP1,HNRNPUL1,SCAF11,WT1,AKAP8L,CDK12,PPP1R9B	0	0
PolyP	GO:0009952	anterior/posterior pattern specification (GO:0009952)	7/63	0.00010896	0.00961446	7.18328	65.5441	HES7,TBX1,CDX2,WT1,HOXB4,HES1,HOXD3	0	0
PolyP	GO:0010468	regulation of gene expression (GO:0010468)	36/1079	0.000144532	0.0121735	2.05867	18.2028	RB1,CEBPA,CEBPB,NOTCH1,PRDM6,MAZ,SCX,TOB1,ZNF827,ZNF628,ATOH8,ZBTB7B,SRPK2,KDM6B,ZC3H10,ZNF462,ZNF341,SKOR1,RDX,PRRX2,RC3H1,POU3F1,TICAM1,POU3F3,HNRNPL,NR5A1,RBL2,TNRC6C,AFDN,HNRNPK,NFIA,WT1,ESRP2,HOXD3,TAF1,TNRC6B	0	0
PolyP	GO:0006366	transcription by RNA polymerase II (GO:0006366)	16/320	0.000166403	0.0132839	3.06722	26.6881	NOTCH3,CCNK,SETD2,NOTCH1,EAF1,MAZ,DTX1,MLLT1,RPRD2,NR3C2,NR5A1,CDK12,ZBTB7B,CDK13,TAF4,TAF1	0	0
PolyP	GO:0048715	negative regulation of oligodendrocyte differentiation (GO:0048715)	3/7	0.000173547	0.0132839	42.713	369.855	NOTCH1,DAAM2,HES1	0	0
PolyP	GO:0034315	regulation of Arp2/3 complex-mediated actin nucleation (GO:0034315)	4/17	0.000179222	0.0132839	17.5662	151.541	ABI2,WASF1,WASF2,WASF3	0	0
PolyP	GO:0022607	cellular component assembly (GO:0022607)	14/261	0.000206264	0.0147003	3.29305	27.946	NLGN2,WIPF1,FBLIM1,WAS,SHROOM2,RANBP9,WASL,ESPN,RTN4,BAG6,VCPIP1,HES1,WASF1,WASF3	0	0
PolyP	GO:1905634	regulation of protein localization to chromatin (GO:1905634)	3/8	0.000274094	0.0178014	34.1687	280.253	RB1,VCPIP1,SETD2	0	0
PolyP	GO:0120039	plasma membrane bounded cell projection morphogenesis (GO:0120039)	6/52	0.000275637	0.0178014	7.4775	61.2888	SHTN1,NYAP1,DAB2IP,WASF1,DBN1,MYO16	0	0
PolyP	GO:0045892	negative regulation of transcription, DNA-templated (GO:0045892)	32/948	0.000278597	0.0178014	2.07131	16.9552	RB1,CEBPA,CEBPB,NOTCH1,FOXG1,PRDM6,MAZ,ATN1,FASLG,FOXK1,IRF2BPL,RBM15B,ATOH8,HES1,ZBTB7B,SKOR1,SMARCC2,MYPOP,CDX2,DAB2IP,EN1,TRERF1,POU3F3,KLF2,WT1,KAT6A,ZNF318,ERF,FOSB,ZFPM1,RCOR2,TAF1	0	0
PolyP	GO:0000381	regulation of alternative mRNA splicing, via spliceosome (GO:0000381)	6/54	0.000339635	0.0205595	7.1652	57.2331	DDX17,HNRNPL,ZC3H10,KHDRBS2,RBM15B,KHDRBS3	0	0
PolyP	GO:0007274	neuromuscular synaptic transmission (GO:0007274)	4/20	0.000350103	0.0205595	14.2703	113.553	FCHSD1,RIMBP3,RIMBP3C,RIMBP3B	0	0
PolyP	GO:0043484	regulation of RNA splicing (GO:0043484)	7/76	0.000355047	0.0205595	5.82604	46.2778	SRPK2,HNRNPL,KHDRBS2,KHDRBS3,HNRNPK,ESRP2,SF1	0	0
PolyP	GO:0050684	regulation of mRNA processing (GO:0050684)	5/36	0.000374995	0.0210565	9.22646	72.7839	SRPK2,KHDRBS2,KHDRBS3,HNRNPK,SF1	0	0
PolyP	GO:0045686	negative regulation of glial cell differentiation (GO:0045686)	3/9	0.000405845	0.0221186	28.4725	222.357	NOTCH1,DAAM2,HES1	0	0
PolyP	GO:0007219	Notch signaling pathway (GO:0007219)	6/60	0.000603313	0.0319411	6.36712	47.1999	NOTCH3,NOTCH1,DTX1,HES1,DTX3,HOXD3	0	0
PolyP	GO:0030865	cortical cytoskeleton organization (GO:0030865)	5/41	0.000694305	0.0357374	7.94299	57.7662	FHOD3,FMNL3,STRIP1,FMNL1,FMNL2	0	0
PolyP	GO:0032968	positive regulation of transcription elongation from RNA polymerase II promoter (GO:0032968)	3/11	0.000776814	0.0389037	21.3522	152.888	CDK12,CDK13,BRD4	0	0
PolyP	GO:0032786	positive regulation of DNA-templated transcription, elongation (GO:0032786)	4/25	0.000853503	0.0416195	10.8699	76.8083	CCNK,CDK12,CDK13,BRD4	0	0
PolyP	GO:0030335	positive regulation of cell migration (GO:0030335)	13/269	0.000916902	0.0435646	2.94016	20.565	DOCK5,NOTCH1,TRADD,RDX,MAZ,DAB2IP,SEMA4G,RTN4,SHTN1,GPNMB,CBLL1,WASHC1,DOCK1	0	0
PolyP	GO:0061014	positive regulation of mRNA catabolic process (GO:0061014)	5/44	0.000964248	0.0435793	7.33087	50.9067	TNRC6C,RC3H1,MEX3D,TOB1,TNRC6B	0	0
PolyP	GO:0048260	positive regulation of receptor-mediated endocytosis (GO:0048260)	5/44	0.000964248	0.0435793	7.33087	50.9067	DGKD,HNRNPK,SGIP1,WASL,CBL	0	0
PolyP	GO:0006368	transcription elongation from RNA polymerase II promoter (GO:0006368)	6/67	0.00108639	0.0479306	5.63445	38.4546	CCNK,SETD2,EAF1,MLLT1,CDK12,CDK13	0	0
PolyP	GO:0034243	regulation of transcription elongation from RNA polymerase II promoter (GO:0034243)	4/27	0.00115213	0.0496487	9.92366	67.1449	EAF1,CDK12,CDK13,BRD4	0	0
PolyE	GO:0006357	regulation of transcription by RNA polymerase II (GO:0006357)	83/2206	1.72497e-10	3.01697e-07	2.38483	53.6126	ZNF771,CSRNP3*,MYT1L*,EHMT2*,WWC1,HMGB2,HNRNPU,HMGB3*,RSF1,PRDM2,ARID4B,CHD4,ZBTB22,PKD2,FERD3L,ZNF608,CCND1,SALL2,SIX5*,BBX,PKNOX2,PELP1*,PIAS4,BRD2,KDM2A,ATP1B4*,ZFP91,SOX12,RFX1*,ZBTB33,BAZ1B,MYT1*,ZEB2,ZEB1,HAX1,AEBP2*,KAT6B,TFDP3,KAT6A*,TET3,ZNF316,IRF5*,ZNF513,HOXB7,VGLL3,HOMEZ,CTDP1,AKNA,ZBTB47,TSHZ2,NOP2,WIZ,AEBP1,ZBTB4,MED12L,NEUROD1,NEUROD2,NEUROD4,MIER1,ZBTB7B,PPARGC1B*,ZBTB7C,PCGF6*,Z…	22	0.27	HMGB3: O15347_p_1_1, RFX1: P22670_p_3_1, DEK: P35659_p_1_1, IRX6: P78412_p_2_1, MYT1: Q01538_p_1_1; Q01538_p_2_1, IRF5: Q13568_p_1_1, TAF3: Q5VWG9_p_1_1, AEBP2: Q6ZN18_p_1_1, PPARGC1B: Q86YN6_p_1_1, PELP1: Q8IZL8_p_2_1; Q8IZL8_p_3_1; Q8IZL8_p_4_1; Q8IZL8_p_5_1, SIX5: Q8N196_p_1_1, PAF1: Q8N7H5_p_1_1, CSRNP3: Q8WYN3_p_2_1, KAT6A: Q92794_p_1_1, EHMT2: Q96KQ7_p_2_1, TRERF1: Q96PN7_p_2_1, PCGF6: Q9BY…
PolyE	GO:0006355	regulation of transcription, DNA-templated (GO:0006355)	79/2244	1.118e-08	9.77693e-06	2.19	40.0971	ZNF771,ZMYND15*,CSRNP3*,MYT1L*,WWC1,HMGB2,HMGB3*,RSF1,PRDM2,ARID4B,CHD4,ZBTB22,RRP8,FERD3L,ZNF608,SALL2,SIX5*,UIMC1*,BBX,PKNOX2,PIAS4,BRD2,DAXX,KDM2A,ATP1B4*,ZFP91,SOX12,RFX1*,ZBTB33,BAZ1B,MYT1*,ZEB2,ZEB1,AEBP2*,KAT6B,TFDP3,KAT6A*,TIMELESS*,ZNF316,TERF2IP,IRF5*,HOXB7,VGLL3,HOMEZ,ZBTB47,TSHZ2,NOP2,WIZ,ZBTB4,MED12L,NEUROD1,NEUROD2,NEUROD4,ZBTB7B,PPARGC1B*,ZBTB7C,PCGF6*,CDK11A,ZFHX2,BCL11B*,BCL11A*,…	21	0.27	HMGB3: O15347_p_1_1, RFX1: P22670_p_3_1, DEK: P35659_p_1_1, IRX6: P78412_p_2_1, MYT1: Q01538_p_1_1; Q01538_p_2_1, IRF5: Q13568_p_1_1, AEBP2: Q6ZN18_p_1_1, PPARGC1B: Q86YN6_p_1_1, SIX5: Q8N196_p_1_1, CSRNP3: Q8WYN3_p_2_1, KAT6A: Q92794_p_1_1, TRERF1: Q96PN7_p_2_1, UIMC1: Q96RL1_p_1_1, PCGF6: Q9BYE7_p_1_1, BCL11B: Q9C0K0_p_1_1, ZMYND15: Q9H091_p_1_1, BCL11A: Q9H165_p_1_1, MYT1L: Q9UL68_p_1_1, ATP1B…
PolyE	GO:0034728	nucleosome organization (GO:0034728)	11/94	1.31086e-06	0.000764229	7.21606	97.7403	BRD2,DAXX,KAT6B,GRWD1,HMGB2,ANP32E,NAP1L2,PAF1*,RSF1,SUPT6H,SMARCA4	1	0.09	PAF1: Q8N7H5_p_1_1
PolyE	GO:0006303	double-strand break repair via nonhomologous end joining (GO:0006303)	9/62	1.96803e-06	0.000860522	9.20885	120.99	BABAM1,PIAS4,RNF168*,KDM2A,PAXIP1*,UIMC1*,HMGB2,ERCC6,CYREN*	4	0.44	PAXIP1: Q6ZW49_p_1_1, RNF168: Q8IYW5_p_1_1, UIMC1: Q96RL1_p_1_1, CYREN: Q9BWK5_p_1_1
PolyE	GO:0006338	chromatin remodeling (GO:0006338)	10/103	2.13131e-05	0.00745532	5.83542	62.7669	MBD3,DAXX,KDM4B,NPM2*,CHD4,RSF1,ERCC6,BAZ1B,SMARCA2,SMARCA4	1	0.1	NPM2: Q86SE8_p_1_1; Q86SE8_p_2_1
PolyE	GO:0045892	negative regulation of transcription, DNA-templated (GO:0045892)	36/948	3.74199e-05	0.0109079	2.21218	22.5494	ZMYND15*,MYT1L*,EHMT2*,WWC1,HMGB2,HNRNPU,RSF1,PRDM2,AEBP1,ZBTB4,FERD3L,ZNF608,CCND1,MIER1,UIMC1*,ZBTB7B,PIAS4,DAXX,PCGF6*,KDM2A,BCL11A*,ZBTB33,SUPT5H,SMARCA2,TRERF1*,SMARCA4,ZEB2,ZEB1,KAT6B,KAT6A*,TIMELESS*,PAF1*,HDGF,TAF3*,TRIM33,GZF1	11	0.31	TAF3: Q5VWG9_p_1_1, PAF1: Q8N7H5_p_1_1, KAT6A: Q92794_p_1_1, EHMT2: Q96KQ7_p_2_1, TRERF1: Q96PN7_p_2_1, UIMC1: Q96RL1_p_1_1, PCGF6: Q9BYE7_p_1_1, ZMYND15: Q9H091_p_1_1, BCL11A: Q9H165_p_1_1, MYT1L: Q9UL68_p_1_1, TIMELESS: Q9UNS1_p_1_1
PolyE	GO:0098660	inorganic ion transmembrane transport (GO:0098660)	4/12	5.07214e-05	0.0126731	26.806	265.089	ABCC8,ATP1B4*,ABCC9*,PKD2	2	0.5	ABCC9: O60706_p_1_1, ATP1B4: Q9UN42_p_1_1; Q9UN42_p_2_1
PolyE	GO:0031497	chromatin assembly (GO:0031497)	8/73	5.99557e-05	0.0131078	6.65193	64.6695	BRD2,DAXX,KAT6B,GRWD1,HMGB2,NAP1L2,PAF1*,RSF1	1	0.12	PAF1: Q8N7H5_p_1_1
PolyE	GO:0006334	nucleosome assembly (GO:0006334)	7/58	9.35939e-05	0.0158532	7.40307	68.6749	BRD2,DAXX,KAT6B,GRWD1,HMGB2,NAP1L2,RSF1	0	0
PolyE	GO:0006364	rRNA processing (GO:0006364)	12/173	9.47472e-05	0.0158532	4.05337	37.5516	NOP58,NOB1,UTP3,PES1*,NOP2,DHX37,NOLC1,RRP12*,PWP2,SENP3,RRP9,PELP1*	3	0.25	PES1: O00541_p_1_1, RRP12: Q5JTH9_p_1_1, PELP1: Q8IZL8_p_2_1; Q8IZL8_p_3_1; Q8IZL8_p_4_1; Q8IZL8_p_5_1
PolyE	GO:0034470	ncRNA processing (GO:0034470)	13/201	9.97058e-05	0.0158532	3.76581	34.6955	NOP58,TUT7,UTP3,NOLC1,PWP2,SENP3,RRP9,NOB1,PES1*,DHX37,DROSHA*,RRP12*,PELP1*	4	0.31	PES1: O00541_p_1_1, RRP12: Q5JTH9_p_1_1, PELP1: Q8IZL8_p_2_1; Q8IZL8_p_3_1; Q8IZL8_p_4_1; Q8IZL8_p_5_1, DROSHA: Q9NRR4_p_1_1
PolyE	GO:0043044	ATP-dependent chromatin remodeling (GO:0043044)	6/42	0.000115041	0.0167672	8.97161	81.3745	MBD3,ANP32E,CHD4,ERCC6,SMARCA2,SMARCA4	0	0
PolyE	GO:0016072	rRNA metabolic process (GO:0016072)	11/162	0.000221902	0.0298543	3.95265	33.2547	NOP58,NOB1,UTP3,PES1*,DHX37,NOLC1,RRP12*,PWP2,SENP3,RRP9,PELP1*	3	0.27	PES1: O00541_p_1_1, RRP12: Q5JTH9_p_1_1, PELP1: Q8IZL8_p_2_1; Q8IZL8_p_3_1; Q8IZL8_p_4_1; Q8IZL8_p_5_1
PolyE	GO:0006351	transcription, DNA-templated (GO:0006351)	13/221	0.000255082	0.0301194	3.40021	28.1331	GTF3C3,CTDP1,GTF3C5,POLR3GL,RSF1,DEK*,SUPT5H,SUPT6H,PAF1*,ERCC6,ZBTB7B,PTMA,TAF3*	3	0.23	DEK: P35659_p_1_1, TAF3: Q5VWG9_p_1_1, PAF1: Q8N7H5_p_1_1
PolyE	GO:0000377	RNA splicing, via transesterification reactions with bulged adenosine as nucleophile (GO:0000377)	14/251	0.000258314	0.0301194	3.21792	26.5843	SF3A3*,ISY1,SF3B2,PRPF38A*,YTHDC1*,RBM19*,HNRNPU,CWC27*,MFAP1,CWC22,DHX16,SNIP1*,RBM10*,RBM6	7	0.5	RBM10: P98175_p_2_1, SF3A3: Q12874_p_1_1, CWC27: Q6UX04_p_1_1, PRPF38A: Q8NAV1_p_1_1, SNIP1: Q8TAD8_p_1_1, YTHDC1: Q96MU7_p_1_1, RBM19: Q9Y4C8_p_1_1
PolyS	GO:0006357	regulation of transcription by RNA polymerase II (GO:0006357)	71/2206	3.71514e-16	5.16405e-13	3.64217	129.403	CSRNP1,CRTC2,CCNT2,CHD8,ONECUT1,ATN1,TCF20,PRDM2,ARID4B,ZBTB22,GLI1,MEIOSIN,SALL1,DACH1,CIR1,SOX4,RNF111,MEF2A,BRD3,KDM6B,MED1,BRD2,KLF12,TFE3*,SOX11,OLIG1,MED4,PPRC1,ARID1A,SREBF2,JMJD6,THRAP3,ERF,PRKD2,HDGFL2,IRF9,FOXC1,DLX2,TSHZ3,TNKS,GATA6,LRP5,HOXD13,RTF1,BHLHE22*,ZBTB4,NPAS1,MLLT6,RAI1,CUX2,CAMTA2,ZNF865,E2F4,NKX6-1,FNIP2,EGR1,FOXF2,CBX2,POU6F2,EAF2,NR1D1,ARID3B,POU4F2,SP4,BCL6B,HOXD4,GTF2I…	2	0.03	TFE3: P19532_p_1_1, BHLHE22: Q8NFJ8_p_4_1
PolyS	GO:0006355	regulation of transcription, DNA-templated (GO:0006355)	71/2244	9.08025e-16	6.31078e-13	3.57077	123.675	CSRNP1,CCNT2,CHD8,ONECUT1,TCF20,PRDM2,ARID4B,ZBTB22,GLI1,MEIOSIN,SALL1,DACH1,CIR1,SOX4,RNF111,MEF2A,BRD3,MED1,BRD2,KLF12,TFE3*,SOX11,OLIG1,MED4,ARID1A,SREBF2,JMJD6,THRAP3,ERF,HDGFL2,IRF9,FOXC1,DLX2,TSHZ3,GATA6,LRP5,XPC,HOXD13,PRICKLE1,BHLHE22*,MLLT3,ZBTB4,NPAS1,MLLT6,BICRA,MBTD1,RAI1,CUX2,ZNF703,CAMTA2,ZNF865,E2F4,NKX6-1,RUNX1T1,EGR1,BRPF1,FOXF2,POU6F2,NR1D1,FOXN3,ARID3B,GDF6,POU4F2,SP4,BCL6B,RLI…	2	0.03	TFE3: P19532_p_1_1, BHLHE22: Q8NFJ8_p_4_1
PolyS	GO:0045893	positive regulation of transcription, DNA-templated (GO:0045893)	45/1183	1.27849e-12	5.92369e-10	3.9395	107.885	CSRNP1,FOXC1,CRTC2,CCNT2,TNKS,CHD8,ONECUT1,GATA6,LRP5,XPC,TCF20,HOXD13,PRDM2,GLI1,MLLT3,MLLT6,BICRA,RAI1,SALL1,UBTF,CAMTA2,E2F4,NKX6-1,SOX4,RNF111,MEF2A,KDM6B,MED1,EGR1,BRPF1,FOXF2,TFE3*,EAF2,SOX11,NR1D1,MED4,GDF6,PPRC1,ARID1A,SREBF2,POU4F2,JMJD6,THRAP3,PRKD2,HOXD4	1	0.02	TFE3: P19532_p_1_1
PolyS	GO:0045944	positive regulation of transcription by RNA polymerase II (GO:0045944)	38/908	5.72474e-12	1.98935e-09	4.25479	110.141	CSRNP1,FOXC1,CRTC2,CCNT2,TNKS,CHD8,ONECUT1,GATA6,LRP5,TCF20,HOXD13,PRDM2,GLI1,MLLT6,SALL1,CAMTA2,E2F4,NKX6-1,SOX4,RNF111,MEF2A,KDM6B,MED1,EGR1,FOXF2,TFE3*,EAF2,SOX11,NR1D1,MED4,PPRC1,SREBF2,POU4F2,JMJD6,THRAP3,PRKD2,HOXD4,CDK13	1	0.03	TFE3: P19532_p_1_1
PolyS	GO:0045892	negative regulation of transcription, DNA-templated (GO:0045892)	34/948	4.65076e-09	1.29291e-06	3.54218	67.9612	FOXC1,DLX2,TSHZ3,CHD8,GATA6,ATN1,PRDM2,RTF1,PRICKLE1,ZBTB4,NPAS1,MBTD1,CUX2,SALL1,DACH1,ZNF703,CIR1,NKX6-1,FNIP2,RUNX1T1,MEF2A,MED1,KLF12,CBX2,SOX11,NR1D1,FOXN3,SREBF2,POU4F2,BCL6B,RLIM,ERF,GTF2IRD1,INSM2	0	0
PolyS	GO:1903508	positive regulation of nucleic acid-templated transcription (GO:1903508)	24/511	7.06008e-09	1.63559e-06	4.56824	85.7403	MED1,EGR1,FOXC1,BRPF1,FOXF2,CHD8,TFE3*,GATA6,LRP5,SOX11,XPC,NR1D1,MED4,GDF6,GLI1,ARID1A,MLLT3,JMJD6,BICRA,RAI1,SALL1,THRAP3,SOX4,RNF111	1	0.04	TFE3: P19532_p_1_1
PolyS	GO:0000122	negative regulation of transcription by RNA polymerase II (GO:0000122)	27/684	3.01057e-08	5.97814e-06	3.83114	66.3498	FOXC1,DLX2,CHD8,GATA6,ATN1,PRDM2,RTF1,ZBTB4,CUX2,SALL1,DACH1,BAG3,CIR1,NKX6-1,FNIP2,MEF2A,MED1,KLF12,CBX2,SOX11,NR1D1,SREBF2,POU4F2,BCL6B,ERF,GTF2IRD1,INSM2	0	0
PolyS	GO:0035332	positive regulation of hippo signaling (GO:0035332)	3/5	1.51456e-05	0.00263155	129.472	1436.85	IQCJ-SCHIP1,SCHIP1,SOX11	0	0
PolyS	GO:2000113	negative regulation of cellular macromolecule biosynthetic process (GO:2000113)	18/547	7.47535e-05	0.0115453	3.05904	29.0649	NANOS1,TSHZ3,CHD8,PCIF1,GATA6,TSC1,NR1D1,PRICKLE1,FOXN3,ZBTB4,NPAS1,MBTD1,SALL1,DACH1,ZNF703,RLIM,CIR1,RUNX1T1	0	0
PolyS	GO:2000112	regulation of cellular macromolecule biosynthetic process (GO:2000112)	16/468	0.000121852	0.0159541	3.16552	28.5299	FOXC1,PCIF1,ONECUT1,POU6F2,NOLC1,SOX11,HOXD13,PRDM2,TSC1,FOXN3,ZBTB4,MLLT6,ZNF703,GTF2IRD1,SOX4,BRDT	0	0
PolyS	GO:0006368	transcription elongation from RNA polymerase II promoter (GO:0006368)	6/67	0.000126256	0.0159541	8.57696	76.9971	CCNT2,ADRM1,EAF2,RTF1,MLLT3,CDK13	0	0
PolyS	GO:0006354	DNA-templated transcription, elongation (GO:0006354)	6/69	0.000148769	0.0172324	8.30383	73.1827	CCNT2,ADRM1,EAF2,RTF1,MLLT3,CDK13	0	0
PolyS	GO:0002065	columnar/cuboidal epithelial cell differentiation (GO:0002065)	3/11	0.000237334	0.0253765	32.3581	270.062	GATA6,SOX11,SOX4	0	0
PolyS	GO:0006351	transcription, DNA-templated (GO:0006351)	10/221	0.0002689	0.026698	4.1751	34.3242	MEF2A,CCNT2,EAF2,UBTF,RNPS1,RTF1,MED4,MLLT3,GTF2E2,IRF9	0	0
PolyS	GO:1903507	negative regulation of nucleic acid-templated transcription (GO:1903507)	15/464	0.000359885	0.0310419	2.9742	23.5846	TSHZ3,CHD8,GATA6,NR1D1,PRICKLE1,FOXN3,ZBTB4,NPAS1,MBTD1,SALL1,DACH1,ZNF703,RLIM,CIR1,RUNX1T1	0	0
PolyS	GO:0009913	epidermal cell differentiation (GO:0009913)	5/53	0.000366814	0.0310419	9.04919	71.585	MED1,CDSN,KRT16,GATA6,GLI1	0	0
PolyS	GO:0006366	transcription by RNA polymerase II (GO:0006366)	12/320	0.00037965	0.0310419	3.44628	27.1438	MED1,CCNT2,SNAPC4,ADRM1,EAF2,RTF1,NR1D1,MED4,CDK13,MLLT3,GTF2E2,IRF9	0	0
PolyG	GO:0006355	regulation of transcription, DNA-templated (GO:0006355)	68/2244	9.59913e-20	1.17685e-16	4.67108	204.547	PRDM8,CREBZF,ONECUT2,HOXC13,HOXA10,ZXDA,MED14,SOX1,DACH1,ZIC2,ZXDB,NKX1-2,SOX7,SOX4,DDX17,FOXD1,ZNF282,ZNF281,FOXL2,RFX1,POU3F1,ARID1A,POU3F2,POU3F3,SFPQ,AEBP2,TAL1,HOXB3,HDAC5,DLX2,FOXC1,SHOX2,LEF1,BHLHE22,NPAS3,MLLT6,BICRA,PURA,GBX1,DHX36,NKX2-1,SHOX,ZNF746,ZNF503,EGR1,ZNF384,SKOR1,TCF7L1,FOXF2,GSX1,FUS,FOXF1,ZBTB10,ARID3A,SMAD6,POU2F2,WTIP,POU4F1,HNRNPAB,PHOX2B,POU4F2,PHOX2A,SMAD7,NR6A1,YEATS2…	0	0
PolyG	GO:0006357	regulation of transcription by RNA polymerase II (GO:0006357)	66/2206	8.34111e-19	5.1131e-16	4.54238	189.09	CREBZF,ONECUT2,HNRNPU,HOXC13,HOXA10,ZXDA,MED14,SOX1,DACH1,ZIC2,ZXDB,NKX1-2,SOX4,DDX17,FOXD1,ZNF282,ZNF281,FOXL2,RFX1,POU3F1,ARID1A,POU3F2,POU3F3,SFPQ,AEBP2,TAL1,HOXB3,MPND,HDAC5,DLX2,FOXC1,SHOX2,LEF1,BHLHE22,NPAS3,MLLT6,PURA,GBX1,DHX36,NKX2-1,SHOX,ZNF746,BCL9L,EGR1,ZNF384,SKOR1,TCF7L1,FOXF2,GSX1,FUS,FOXF1,ZBTB10,ARID3A,SMAD6,POU2F2,POU4F1,PHOX2B,POU4F2,PHOX2A,SMAD7,ASXL1,NR6A1,YEATS2,SP3,SP8,HOXD9	0	0
PolyG	GO:0045893	positive regulation of transcription, DNA-templated (GO:0045893)	44/1183	1.31442e-15	5.3716e-13	5.08044	174.083	HDAC5,FOXC1,ONECUT2,LEF1,HNRNPU,HOXC13,NPAS3,MLLT6,BICRA,HOXA10,ZXDA,MED14,SOX1,ZIC2,DHX36,NKX2-1,SHOX,ZNF746,SOX4,BCL9L,DDX17,EGR1,FOXF2,GSX1,FOXF1,ZNF281,FOXL2,POU3F1,POU2F2,ARID1A,POU3F2,POU4F1,HNRNPAB,POU3F3,PHOX2B,POU4F2,PHOX2A,SMAD7,ASXL1,SFPQ,TAL1,SP3,HOXB3,MPND	0	0
PolyG	GO:0045944	positive regulation of transcription by RNA polymerase II (GO:0045944)	34/908	3.21311e-12	9.84819e-10	4.84734	128.279	HDAC5,FOXC1,ONECUT2,MEPCE,LEF1,HNRNPU,MLLT6,HOXA10,MED14,SOX1,DHX36,NKX2-1,SHOX,ZNF746,SOX4,BCL9L,DDX17,EGR1,FOXF2,GSX1,FOXF1,POU2F2,POU3F2,POU4F1,PHOX2B,POU4F2,PHOX2A,SMAD7,ASXL1,SFPQ,TAL1,SP3,HOXB3,MPND	0	0
PolyG	GO:0010468	regulation of gene expression (GO:0010468)	33/1079	1.34975e-09	3.3096e-07	3.86998	79.0379	PRDM8,TRIM71,HDAC5,GSK3A,FOXC1,LEF1,MLLT6,SOX1,TRA2B,DHX36,NKX2-1,ZNF503,SOX7,SOX4,EGR1,SKOR1,TCF7L1,FOXD1,ZNF282,FUS,ZNF281,BRAF,POU3F1,WTIP,POU4F1,HNRNPAB,POU3F3,PHOX2B,HNRNPL,SFPQ,FUBP1,SP3,FAM98B	0	0
PolyG	GO:1903508	positive regulation of nucleic acid-templated transcription (GO:1903508)	21/511	1.33171e-08	2.69982e-06	5.01922	91.0196	EGR1,FOXC1,FOXF2,FOXF1,ZNF281,LEF1,FOXL2,HOXC13,POU3F1,ARID1A,HNRNPAB,POU3F3,NPAS3,BICRA,ZXDA,MED14,ZIC2,TAL1,SP3,NKX2-1,SOX4	0	0
PolyG	GO:0045892	negative regulation of transcription, DNA-templated (GO:0045892)	29/948	1.54149e-08	2.69982e-06	3.79778	68.3142	CREBZF,HDAC5,DLX2,FOXC1,SHOX2,LEF1,HNRNPU,PURA,SOX1,DACH1,ZIC2,NKX2-1,ZNF746,ZNF503,SOX7,SKOR1,FOXD1,ZNF282,ZNF281,FOXL2,POU4F1,POU3F3,POU4F2,SMAD7,SFPQ,NR6A1,YEATS2,SP3,HOXD9	0	0
PolyG	GO:2000113	negative regulation of cellular macromolecule biosynthetic process (GO:2000113)	20/547	2.01144e-07	3.08254e-05	4.40936	67.9891	TRIM71,CREBZF,HDAC5,GSK3A,FOXD1,ZNF282,ZNF281,LEF1,FOXL2,POU3F3,SFPQ,DACH1,YEATS2,ZIC2,DHX36,SP3,NKX2-1,ZNF746,ZNF503,SOX7	0	0
PolyG	GO:0007399	nervous system development (GO:0007399)	17/447	1.01486e-06	0.000138247	4.53458	62.5806	SEMA6B,TRIM71,DAGLA,GSX1,SHOX2,FBXL17,POU3F1,POU3F2,POU4F1,POU3F3,PHOX2B,SDK1,ADGRB2,ZIC2,EVL,MARK4,MNX1	0	0
PolyG	GO:1903507	negative regulation of nucleic acid-templated transcription (GO:1903507)	17/464	1.68775e-06	0.000206918	4.3583	57.931	CREBZF,HDAC5,FOXD1,ZNF282,ZNF281,LEF1,FOXL2,POU3F3,SFPQ,DACH1,YEATS2,ZIC2,SP3,NKX2-1,ZNF746,ZNF503,SOX7	0	0
PolyG	GO:0000122	negative regulation of transcription by RNA polymerase II (GO:0000122)	20/684	6.25399e-06	0.000697036	3.47474	41.6354	HDAC5,DLX2,FOXC1,SKOR1,ZNF282,ZNF281,SHOX2,HNRNPU,POU4F1,POU4F2,SMAD7,PURA,SFPQ,SOX1,DACH1,NR6A1,YEATS2,NKX2-1,ZNF746,HOXD9	0	0
PolyG	GO:0048762	mesenchymal cell differentiation (GO:0048762)	6/51	7.59165e-06	0.000775614	14.6437	172.627	DDX17,FOXC1,FOXF2,LEF1,FBXL17,HNRNPAB	0	0
PolyG	GO:0000398	mRNA splicing, via spliceosome (GO:0000398)	12/274	1.03566e-05	0.000976707	5.14662	59.0723	DDX17,HNRNPL,SFPQ,FUS,TRA2B,SRSF1,TRA2A,HNRNPU,U2AF1,RALY,SRSF11,HNRNPA0	0	0
PolyG	GO:1903506	regulation of nucleic acid-templated transcription (GO:1903506)	15/430	1.26249e-05	0.00110558	4.1004	46.2519	PRDM8,FOXC1,SKOR1,TCF7L1,ZNF282,FUS,ZNF281,WTIP,MLLT6,SFPQ,SOX1,SP3,RALY,SOX7,SOX4	0	0
PolyG	GO:0000377	RNA splicing, via transesterification reactions with bulged adenosine as nucleophile (GO:0000377)	11/251	2.42171e-05	0.0019436	5.12652	54.487	HNRNPL,SFPQ,FUS,TRA2B,SRSF1,TRA2A,HNRNPU,U2AF1,RALY,SRSF11,HNRNPA0	0	0
PolyG	GO:0006397	mRNA processing (GO:0006397)	12/300	2.54772e-05	0.0019436	4.67577	49.459	HNRNPL,SFPQ,FUS,TRA2B,SRSF1,TRA2A,HNRNPU,U2AF1,RALY,RPRD2,SRSF11,HNRNPA0	0	0
PolyG	GO:0003357	noradrenergic neuron differentiation (GO:0003357)	3/7	2.69504e-05	0.0019436	81.1885	854.226	PHOX2B,SOX4,PHOX2A	0	0
PolyG	GO:2000112	regulation of cellular macromolecule biosynthetic process (GO:2000112)	15/468	3.37573e-05	0.00229925	3.74908	38.6017	PRDM8,ANKRD17,FOXC1,SKOR1,TCF7L1,ZNF282,FUS,ZNF281,WTIP,MLLT6,SFPQ,SOX1,SP3,SOX7,SOX4	0	0
PolyG	GO:0048665	neuron fate specification (GO:0048665)	3/8	4.28254e-05	0.00276337	64.9475	653.267	POU3F2,POU4F1,MNX1	0	0
PolyG	GO:0006396	RNA processing (GO:0006396)	9/179	4.68104e-05	0.00286948	5.87557	58.576	DDX17,HNRNPL,SFPQ,FUS,SRSF1,HNRNPU,U2AF1,SRSF11,HNRNPA0	0	0
PolyG	GO:1902667	regulation of axon guidance (GO:1902667)	3/10	9.05169e-05	0.00528446	46.3864	431.856	ZSWIM8,ZSWIM6,POU4F2	0	0
PolyG	GO:0030182	neuron differentiation (GO:0030182)	8/174	0.000229252	0.0127756	5.31962	44.582	GSX1,FZD8,BHLHE22,POU3F2,SOX4,PHOX2B,POU4F2,PHOX2A	0	0
PolyG	GO:0010604	positive regulation of macromolecule metabolic process (GO:0010604)	12/384	0.000263625	0.0140524	3.60438	29.7036	EGR1,GSK3A,FOXD1,FUBP1,DHX36,LEF1,NKX2-1,BRAF,FAM98B,POU3F1,POU4F1,POU3F3	0	0
PolyG	GO:0000380	alternative mRNA splicing, via spliceosome (GO:0000380)	3/18	0.000582671	0.0282598	21.6383	161.159	DDX17,SFPQ,SRSF1	0	0
PolyG	GO:0030520	intracellular estrogen receptor signaling pathway (GO:0030520)	3/18	0.000582671	0.0282598	21.6383	161.159	DDX17,ARID1A,POU4F2	0	0
PolyG	GO:0010628	positive regulation of gene expression (GO:0010628)	13/482	0.00059931	0.0282598	3.09951	22.9975	EGR1,GSK3A,FOXD1,LEF1,BRAF,POU3F1,POU4F1,POU3F3,FUBP1,DHX36,NKX2-1,FAM98B,SOX4	0	0
PolyG	GO:0010717	regulation of epithelial to mesenchymal transition (GO:0010717)	5/76	0.000713965	0.0321919	7.6815	55.65	FOXC1,LEF1,NKX2-1,BCL9L,SMAD7	0	0
PolyG	GO:0003208	cardiac ventricle morphogenesis (GO:0003208)	4/44	0.000735214	0.0321919	10.8648	78.3936	GSK3A,FOXF1,SOX4,SMAD7	0	0
PolyG	GO:0046645	positive regulation of gamma-delta T cell activation (GO:0046645)	2/5	0.00084455	0.0340862	71.779	507.959	LEF1,SOX4	0	0
PolyG	GO:0048483	autonomic nervous system development (GO:0048483)	3/21	0.00093041	0.0340862	18.0291	125.841	PHOX2B,SOX4,PHOX2A	0	0
PolyG	GO:0000154	rRNA modification (GO:0000154)	3/21	0.00093041	0.0340862	18.0291	125.841	FBL,GAR1,FBLL1	0	0
PolyG	GO:2000679	positive regulation of transcription regulatory region DNA binding (GO:2000679)	3/21	0.00093041	0.0340862	18.0291	125.841	FOXC1,POU4F1,POU4F2	0	0
PolyG	GO:0007417	central nervous system development (GO:0007417)	9/268	0.000936982	0.0340862	3.83908	26.7693	SEMA6B,DLX2,ZIC2,GSX1,SETD1A,NKX2-1,MNX1,SOX4,POU3F3	0	0
PolyG	GO:0001837	epithelial to mesenchymal transition (GO:0001837)	4/47	0.000945295	0.0340862	10.1053	70.3734	DDX17,FOXF2,LEF1,HNRNPAB	0	0
PolyG	GO:0050685	positive regulation of mRNA processing (GO:0050685)	3/23	0.0012221	0.0417196	16.2246	108.821	TRA2B,DHX36,TRA2A	0	0
PolyG	GO:0018364	peptidyl-glutamine methylation (GO:0018364)	2/6	0.00125907	0.0417196	53.8315	359.453	FBL,FBLL1	0	0
PolyG	GO:0021522	spinal cord motor neuron differentiation (GO:0021522)	2/6	0.00125907	0.0417196	53.8315	359.453	MNX1,SOX4	0	0
PolyG	GO:0048024	regulation of mRNA splicing, via spliceosome (GO:0048024)	5/90	0.00152999	0.0493623	6.41176	41.5642	DDX17,HNRNPL,TRA2B,TRA2A,HNRNPU	0	0
PolyQ	GO:0006357	regulation of transcription by RNA polymerase II (GO:0006357)	41/2206	1.38615e-12	1.18932e-09	4.66129	127.274	NFAT5,MAML2*,SATB1*,MIDEAS,ATN1*,TCF20,ASCL1*,PRDM10,CHD1*,MED12,RAI1,PURA*,ATXN1*,EP300,OTX2*,TP63*,BRD4*,MEF2A,ZNF384*,CREBBP*,CDX2*,NCOA6*,NCOA3*,POU6F2*,TFEB*,FOXJ2,ARID3B*,AR*ID1A,POU3F2*,SMAR*CA2,RUNX2*,BMP6,THAP11*,NCOR2,AR*,NCOR1,LMX1A*,MAML3*,MAMLD1,TNRC6A,TNRC6B*	25	0.61	CHD1: O14646_p_1_1, BRD4: O60885_p_5_1, AR: P10275_p_1_1, TFEB: P19484_p_1_1, POU3F2: P20265_p_2_1, OTX2: P32243_p_1_1, ASCL1: P50553_p_2_1, ATXN1: P54253_p_1_1; P54253_p_2_1, ATN1: P54259_p_4_1, POU6F2: P78424_p_1_1, PURA: Q00577_p_3_1, SATB1: Q01826_p_1_1, RUNX2: Q13950_p_1_1, NCOA6: Q14686_p_1_1; Q14686_p_2_1, ARID3B: Q8IVW6_p_1_1, MAML2: Q8IZL2_p_1_1; Q8IZL2_p_3_1, LMX1A: Q8TE12_p_1_1, ZNF384…
PolyQ	GO:0045944	positive regulation of transcription by RNA polymerase II (GO:0045944)	25/908	3.30667e-11	1.29062e-08	6.11423	147.552	NFAT5,PAXIP1*,MAML2*,TCF20,ASCL1*,PRDM10,MED12,EP300,OTX2*,TP63*,BRD4*,MEF2A,CREBBP*,CDX2*,NCOA6*,NCOA3*,TFEB*,FOXJ2,POU3F2*,SMAR*CA2,RUNX2*,BMP6,AR*,LMX1A*,MAML3*	16	0.64	BRD4: O60885_p_5_1, AR: P10275_p_1_1, TFEB: P19484_p_1_1, POU3F2: P20265_p_2_1, OTX2: P32243_p_1_1, ASCL1: P50553_p_2_1, RUNX2: Q13950_p_1_1, NCOA6: Q14686_p_1_1; Q14686_p_2_1, PAXIP1: Q6ZW49_p_6_1, MAML2: Q8IZL2_p_1_1; Q8IZL2_p_3_1, LMX1A: Q8TE12_p_1_1, CREBBP: Q92793_p_1_1, MAML3: Q96JK9_p_1_1, CDX2: Q99626_p_2_1, TP63: Q9H3D4_p_1_1, NCOA3: Q9Y6Q9_p_1_1
PolyQ	GO:0006355	regulation of transcription, DNA-templated (GO:0006355)	39/2244	4.83136e-11	1.29062e-08	4.22625	100.388	PRDM8,NFAT5,SATB1*,MIDEAS,CXXC1,TCF20,ASCL1*,CHD1*,MED12,RAI1,PURA*,ATXN1*,EP300,OTX2*,TP63*,BRD4*,MEF2A,ZNF384*,CREBBP*,PHC1*,CDX2*,NCOA6*,NONO,POU6F2*,TFEB*,FOXJ2,ARID3B*,AR*ID1A,POU3F2*,SMAR*CA2,PHC3,RUNX2*,THAP11*,NCOR2,AR*,NCOR1,LMX1A*,QRICH1,MAMLD1	21	0.54	CHD1: O14646_p_1_1, BRD4: O60885_p_5_1, AR: P10275_p_1_1, TFEB: P19484_p_1_1, POU3F2: P20265_p_2_1, OTX2: P32243_p_1_1, ASCL1: P50553_p_2_1, ATXN1: P54253_p_1_1; P54253_p_2_1, PHC1: P78364_p_1_1, POU6F2: P78424_p_1_1, PURA: Q00577_p_3_1, SATB1: Q01826_p_1_1, RUNX2: Q13950_p_1_1, NCOA6: Q14686_p_1_1; Q14686_p_2_1, ARID3B: Q8IVW6_p_1_1, LMX1A: Q8TE12_p_1_1, ZNF384: Q8TF68_p_3_1, CREBBP: Q92793_p_1_…
PolyQ	GO:0045893	positive regulation of transcription, DNA-templated (GO:0045893)	28/1183	6.01686e-11	1.29062e-08	5.34246	125.729	NFAT5,MAML2*,CXXC1,TCF20,ASCL1*,PRDM10,MED12,RAI1,EP300,OTX2*,TP63*,BRD4*,MEF2A,CREBBP*,CDX2*,NCOA6*,NCOA3*,TFEB*,FOXJ2,AR*ID1A,POU3F2*,SMAR*CA2,RUNX2*,BMP6,AR*,LMX1A*,QRICH1,MAML3*	15	0.54	BRD4: O60885_p_5_1, AR: P10275_p_1_1, TFEB: P19484_p_1_1, POU3F2: P20265_p_2_1, OTX2: P32243_p_1_1, ASCL1: P50553_p_2_1, RUNX2: Q13950_p_1_1, NCOA6: Q14686_p_1_1; Q14686_p_2_1, MAML2: Q8IZL2_p_1_1; Q8IZL2_p_3_1, LMX1A: Q8TE12_p_1_1, CREBBP: Q92793_p_1_1, MAML3: Q96JK9_p_1_1, CDX2: Q99626_p_2_1, TP63: Q9H3D4_p_1_1, NCOA3: Q9Y6Q9_p_1_1
PolyQ	GO:0045747	positive regulation of Notch signaling pathway (GO:0045747)	7/45	5.78872e-09	9.93344e-07	34.4943	654.265	CREBBP*,MAML2*,AAK1,BMP2K*,EP300,MAML3*,TP63*	5	0.71	MAML2: Q8IZL2_p_1_1; Q8IZL2_p_3_1, CREBBP: Q92793_p_1_1, MAML3: Q96JK9_p_1_1, TP63: Q9H3D4_p_1_1, BMP2K: Q9NSY1_p_1_1
PolyQ	GO:0009967	positive regulation of signal transduction (GO:0009967)	12/252	1.97642e-08	2.82628e-06	9.72624	172.538	ERN1*,MN1*,CREBBP*,MAML2*,IRS1,AAK1,BMP2K*,EP300,MAML3*,RSPO1,TP63*,BMP6	7	0.58	ERN1: O75460_p_1_1, MN1: Q10571_p_2_1, MAML2: Q8IZL2_p_1_1; Q8IZL2_p_3_1, CREBBP: Q92793_p_1_1, MAML3: Q96JK9_p_1_1, TP63: Q9H3D4_p_1_1, BMP2K: Q9NSY1_p_1_1
PolyQ	GO:0045892	negative regulation of transcription, DNA-templated (GO:0045892)	21/948	6.91057e-08	8.47038e-06	4.66864	76.9747	MEF2A,CREBBP*,PHC1*,CDX2*,SATB1*,NONO,MIDEAS,ATN1*,ASCL1*,SMAR*CA2,PHC3,RUNX2*,BMP6,THAP11*,NCOR2,AR*,PURA*,ATXN1*,NCOR1,EP300,TP63*	12	0.57	AR: P10275_p_1_1, ASCL1: P50553_p_2_1, ATXN1: P54253_p_1_1; P54253_p_2_1, ATN1: P54259_p_4_1, PHC1: P78364_p_1_1, PURA: Q00577_p_3_1, SATB1: Q01826_p_1_1, RUNX2: Q13950_p_1_1, CREBBP: Q92793_p_1_1, THAP11: Q96EK4_p_1_1, CDX2: Q99626_p_2_1, TP63: Q9H3D4_p_1_1
PolyQ	GO:1903508	positive regulation of nucleic acid-templated transcription (GO:1903508)	15/511	1.91158e-07	2.05017e-05	5.98389	92.5718	CREBBP*,NCOA6*,TFEB*,CXXC1,AR*ID1A,SMAR*CA2,RUNX2*,MED12,AR*,RAI1,EP300,OTX2*,QRICH1,TP63*,BRD4*	8	0.53	BRD4: O60885_p_5_1, AR: P10275_p_1_1, TFEB: P19484_p_1_1, OTX2: P32243_p_1_1, RUNX2: Q13950_p_1_1, NCOA6: Q14686_p_1_1; Q14686_p_2_1, CREBBP: Q92793_p_1_1, TP63: Q9H3D4_p_1_1
PolyQ	GO:0008593	regulation of Notch signaling pathway (GO:0008593)	7/83	4.44017e-07	4.23296e-05	17.2141	251.798	CREBBP*,MAML2*,BMP2K*,AAK1,EP300,MAML3*,TP63*	5	0.71	MAML2: Q8IZL2_p_1_1; Q8IZL2_p_3_1, CREBBP: Q92793_p_1_1, MAML3: Q96JK9_p_1_1, TP63: Q9H3D4_p_1_1, BMP2K: Q9NSY1_p_1_1
PolyQ	GO:0007221	positive regulation of transcription of Notch receptor target (GO:0007221)	4/17	2.17225e-06	0.000186379	56.1016	731.551	CREBBP*,MAML2*,EP300,MAML3*	3	0.75	MAML2: Q8IZL2_p_1_1; Q8IZL2_p_3_1, CREBBP: Q92793_p_1_1, MAML3: Q96JK9_p_1_1
PolyQ	GO:0061014	positive regulation of mRNA catabolic process (GO:0061014)	5/44	4.79761e-06	0.00036302	23.5613	288.564	TOB1,GIGYF2*,ZFP36L2*,TNRC6A,TNRC6B*	3	0.6	ZFP36L2: P47974_p_2_1, GIGYF2: Q6Y7W6_p_2_1; Q6Y7W6_p_3_1, TNRC6B: Q9UPQ9_p_3_1
PolyQ	GO:0006352	DNA-templated transcription, initiation (GO:0006352)	8/168	5.07721e-06	0.00036302	9.39381	114.518	NCOR2,AR*,CREBBP*,TBP*,NCOR1,MAML2*,NCOA6*,MAML3*	6	0.75	AR: P10275_p_1_1, TBP: P20226_p_1_1, NCOA6: Q14686_p_1_1; Q14686_p_2_1, MAML2: Q8IZL2_p_1_1; Q8IZL2_p_3_1, CREBBP: Q92793_p_1_1, MAML3: Q96JK9_p_1_1
PolyQ	GO:0000122	negative regulation of transcription by RNA polymerase II (GO:0000122)	15/684	7.12065e-06	0.000469963	4.39691	52.1144	MEF2A,CREBBP*,CDX2*,SATB1*,ATN1*,ASCL1*,SMAR*CA2,BMP6,THAP11*,NCOR2,AR*,PURA*,ATXN1*,NCOR1,EP300	9	0.6	AR: P10275_p_1_1, ASCL1: P50553_p_2_1, ATXN1: P54253_p_1_1; P54253_p_2_1, ATN1: P54259_p_4_1, PURA: Q00577_p_3_1, SATB1: Q01826_p_1_1, CREBBP: Q92793_p_1_1, THAP11: Q96EK4_p_1_1, CDX2: Q99626_p_2_1
PolyQ	GO:2000113	negative regulation of cellular macromolecule biosynthetic process (GO:2000113)	13/547	1.31318e-05	0.000804794	4.7114	52.9584	PHC1*,NONO,MIDEAS,ASCL1*,SMARCA2,PHC3,TOB1,RUNX2*,GIGYF2*,NCOR2,ATXN1*,NCOR1,TP63*	6	0.46	ASCL1: P50553_p_2_1, ATXN1: P54253_p_1_1; P54253_p_2_1, PHC1: P78364_p_1_1, RUNX2: Q13950_p_1_1, GIGYF2: Q6Y7W6_p_2_1; Q6Y7W6_p_3_1, TP63: Q9H3D4_p_1_1
PolyQ	GO:0006367	transcription initiation from RNA polymerase II promoter (GO:0006367)	7/140	1.47487e-05	0.000843625	9.80834	109.111	NCOR2,AR*,CREBBP*,TBP*,NCOR1,MAML2*,MAML3*	5	0.71	AR: P10275_p_1_1, TBP: P20226_p_1_1, MAML2: Q8IZL2_p_1_1; Q8IZL2_p_3_1, CREBBP: Q92793_p_1_1, MAML3: Q96JK9_p_1_1
PolyQ	GO:0007219	Notch signaling pathway (GO:0007219)	5/60	2.24541e-05	0.0012041	16.6936	178.689	CREBBP*,MAML2*,EP300,MAML3*,ASCL1*	4	0.8	ASCL1: P50553_p_2_1, MAML2: Q8IZL2_p_1_1; Q8IZL2_p_3_1, CREBBP: Q92793_p_1_1, MAML3: Q96JK9_p_1_1
PolyQ	GO:0060260	regulation of transcription initiation from RNA polymerase II promoter (GO:0060260)	5/64	3.07893e-05	0.00155395	15.5587	161.629	MED12,PAXIP1*,RUNX2*,TNRC6A,TNRC6B*	3	0.6	RUNX2: Q13950_p_1_1, PAXIP1: Q6ZW49_p_6_1, TNRC6B: Q9UPQ9_p_3_1
PolyQ	GO:0010468	regulation of gene expression (GO:0010468)	18/1079	3.37975e-05	0.00161102	3.36195	34.6117	PRDM8,CREBBP*,NONO,POU6F2*,TFEB*,CXXC1,ASCL1*,PRDM10,SMAR*CA2,TOB1,BMP6,PUM2,AR*,ATXN1*,HNRNPDL*,EP300,TNRC6A,TNRC6B*	8	0.44	HNRNPDL: O14979_p_2_1, AR: P10275_p_1_1, TFEB: P19484_p_1_1, ASCL1: P50553_p_2_1, ATXN1: P54253_p_1_1; P54253_p_2_1, POU6F2: P78424_p_1_1, CREBBP: Q92793_p_1_1, TNRC6B: Q9UPQ9_p_3_1
PolyQ	GO:0060213	positive regulation of nuclear-transcribed mRNA poly(A) tail shortening (GO:0060213)	3/13	4.81953e-05	0.00212328	54.21	538.861	TOB1,TNRC6A,TNRC6B*	1	0.33	TNRC6B: Q9UPQ9_p_3_1
PolyQ	GO:0060765	regulation of androgen receptor signaling pathway (GO:0060765)	4/36	4.94938e-05	0.00212328	22.7695	225.729	NCOR2,AR*,NCOR1,EP300	1	0.25	AR: P10275_p_1_1
PolyQ	GO:1903507	negative regulation of nucleic acid-templated transcription (GO:1903507)	11/464	6.45367e-05	0.00263678	4.62654	44.6382	NCOR2,ATXN1*,PHC1*,NCOR1,NONO,MIDEAS,ASCL1*,SMARCA2,PHC3,TP63*,RUNX2*	5	0.45	ASCL1: P50553_p_2_1, ATXN1: P54253_p_1_1; P54253_p_2_1, PHC1: P78364_p_1_1, RUNX2: Q13950_p_1_1, TP63: Q9H3D4_p_1_1
PolyQ	GO:1900151	regulation of nuclear-transcribed mRNA catabolic process, deadenylation-dependent decay (GO:1900151)	3/15	7.60449e-05	0.0027186	45.1705	428.405	TOB1,ZFP36L2*,TNRC6B*	2	0.67	ZFP36L2: P47974_p_2_1, TNRC6B: Q9UPQ9_p_3_1
PolyQ	GO:0060211	regulation of nuclear-transcribed mRNA poly(A) tail shortening (GO:0060211)	3/15	7.60449e-05	0.0027186	45.1705	428.405	TOB1,TNRC6A,TNRC6B*	1	0.33	TNRC6B: Q9UPQ9_p_3_1
PolyQ	GO:1900153	positive regulation of nuclear-transcribed mRNA catabolic process, deadenylation-dependent decay (GO:1900153)	3/15	7.60449e-05	0.0027186	45.1705	428.405	TOB1,ZFP36L2*,TNRC6B*	2	0.67	ZFP36L2: P47974_p_2_1, TNRC6B: Q9UPQ9_p_3_1
PolyQ	GO:2000112	regulation of cellular macromolecule biosynthetic process (GO:2000112)	10/468	0.000323539	0.0111039	4.11858	33.0977	PRDM8,ATXN2*,CREBBP*,ATXN1*,NONO,POU6F2*,TFEB*,CXXC1,EP300,SMARCA2	5	0.5	TFEB: P19484_p_1_1, ATXN1: P54253_p_1_1; P54253_p_2_1, POU6F2: P78424_p_1_1, CREBBP: Q92793_p_1_1, ATXN2: Q99700_p_1_1
PolyQ	GO:2000142	regulation of DNA-templated transcription, initiation (GO:2000142)	4/61	0.000393377	0.0129815	12.7668	100.101	MED12,RUNX2*,TNRC6A,TNRC6B*	2	0.5	RUNX2: Q13950_p_1_1, TNRC6B: Q9UPQ9_p_3_1
PolyQ	GO:0035520	monoubiquitinated protein deubiquitination (GO:0035520)	2/6	0.000467629	0.0144913	89.5631	686.755	ATXN3*,USP7	1	0.5	ATXN3: P54252_p_1_1
PolyQ	GO:0016570	histone modification (GO:0016570)	5/114	0.000473948	0.0144913	8.40044	64.3005	CREBBP*,PHC1*,ATXN7*,MIDEAS,EP300	3	0.6	ATXN7: O15265_p_2_1, PHC1: P78364_p_1_1, CREBBP: Q92793_p_1_1
PolyQ	GO:0010629	negative regulation of gene expression (GO:0010629)	8/322	0.000489799	0.0144913	4.74929	36.1968	ERN1*,NCOR2,NCOR1,TOB1,ZFP36L2*,GIGYF2*,TNRC6A,TNRC6B*	4	0.5	ERN1: O75460_p_1_1, ZFP36L2: P47974_p_2_1, GIGYF2: Q6Y7W6_p_2_1; Q6Y7W6_p_3_1, TNRC6B: Q9UPQ9_p_3_1
PolyQ	GO:0045637	regulation of myeloid cell differentiation (GO:0045637)	4/68	0.000595555	0.0170329	11.3664	84.4071	CREBBP*,EP300,TNRC6A,TNRC6B*	2	0.5	CREBBP: Q92793_p_1_1, TNRC6B: Q9UPQ9_p_3_1
PolyQ	GO:1903506	regulation of nucleic acid-templated transcription (GO:1903506)	9/430	0.000750836	0.0207257	4.00132	28.7868	PRDM8,CREBBP*,ATXN1*,NONO,POU6F2*,TFEB*,CXXC1,EP300,SMARCA2	4	0.44	TFEB: P19484_p_1_1, ATXN1: P54253_p_1_1; P54253_p_2_1, POU6F2: P78424_p_1_1, CREBBP: Q92793_p_1_1
PolyQ	GO:0035195	gene silencing by miRNA (GO:0035195)	3/32	0.000772986	0.0207257	18.6752	133.813	TNRC6A,PUM2,TNRC6B*	1	0.33	TNRC6B: Q9UPQ9_p_3_1
PolyQ	GO:0048665	neuron fate specification (GO:0048665)	2/8	0.000866475	0.0225283	59.7027	420.968	ASCL1*,POU3F2*	2	1	POU3F2: P20265_p_2_1, ASCL1: P50553_p_2_1
PolyQ	GO:0060255	regulation of macromolecule metabolic process (GO:0060255)	6/200	0.00096564	0.0241798	5.69217	39.5191	HNRNPDL*,TFEB*,RSPO1,ASCL1*,PRDM10,TOB1	3	0.5	HNRNPDL: O14979_p_2_1, TFEB: P19484_p_1_1, ASCL1: P50553_p_2_1
PolyQ	GO:0007399	nervous system development (GO:0007399)	9/447	0.000986354	0.0241798	3.84266	26.597	ATXN3*,NUMBL*,ATXN1*,ATN1*,POU6F2*,EP300,ASCL1*,POU3F2*,CHERP*	8	0.89	POU3F2: P20265_p_2_1, ASCL1: P50553_p_2_1, ATXN3: P54252_p_1_1, ATXN1: P54253_p_1_1; P54253_p_2_1, ATN1: P54259_p_4_1, POU6F2: P78424_p_1_1, CHERP: Q8IWX8_p_1_1, NUMBL: Q9Y6R0_p_1_1
PolyQ	GO:0002090	regulation of receptor internalization (GO:0002090)	3/36	0.00109461	0.0260883	16.4083	111.861	ATXN2*,TBC1D5,RSPO1	1	0.33	ATXN2: Q99700_p_1_1
PolyQ	GO:0018394	peptidyl-lysine acetylation (GO:0018394)	2/10	0.00138229	0.0312481	44.7725	294.783	CREBBP*,EP300	1	0.5	CREBBP: Q92793_p_1_1
PolyQ	GO:0048259	regulation of receptor-mediated endocytosis (GO:0048259)	3/39	0.00138395	0.0312481	15.0386	98.9966	AAK1,BMP2K*,RSPO1	1	0.33	BMP2K: Q9NSY1_p_1_1
PolyQ	GO:0048009	insulin-like growth factor receptor signaling pathway (GO:0048009)	2/11	0.00168324	0.0370313	39.7958	254.177	IRS1,GIGYF2*	1	0.5	GIGYF2: Q6Y7W6_p_2_1; Q6Y7W6_p_3_1
PolyQ	GO:0019216	regulation of lipid metabolic process (GO:0019216)	4/92	0.00184207	0.0395123	8.25646	51.9899	NCOR2,CREBBP*,NCOR1,NCOA6*	2	0.5	NCOA6: Q14686_p_1_1; Q14686_p_2_1, CREBBP: Q92793_p_1_1
PolyQ	GO:0045669	positive regulation of osteoblast differentiation (GO:0045669)	3/44	0.00196493	0.0401554	13.2013	82.2747	TP63*,BMP6,RUNX2*	2	0.67	RUNX2: Q13950_p_1_1, TP63: Q9H3D4_p_1_1
PolyQ	GO:0060965	negative regulation of gene silencing by miRNA (GO:0060965)	2/12	0.00201245	0.0401554	35.8144	222.35	NCOR2,NCOR1	0	0
PolyQ	GO:1903799	negative regulation of production of miRNAs involved in gene silencing by miRNA (GO:1903799)	2/12	0.00201245	0.0401554	35.8144	222.35	NCOR2,NCOR1	0	0
PolyQ	GO:0006366	transcription by RNA polymerase II (GO:0006366)	7/320	0.0022859	0.044575	4.12978	25.1132	NCOR2,AR*,CREBBP*,TBP*,NCOR1,MAML2*,MAML3*	5	0.71	AR: P10275_p_1_1, TBP: P20226_p_1_1, MAML2: Q8IZL2_p_1_1; Q8IZL2_p_3_1, CREBBP: Q92793_p_1_1, MAML3: Q96JK9_p_1_1
PolyA	GO:0006357	regulation of transcription by RNA polymerase II (GO:0006357)	28/2206	4.57277e-07	0.000311406	3.50648	51.1875	RB1,CASZ1,ZNF395*,KDM1A*,EHMT2,SRF,ARX*,FOXK2,TCF20,ASCL1*,HOXA11,RXRB*,DACH1,FOXF2,ZFP91,SOX12,ARID1A,PHOX2B*,NCOR1,RGCC*,SP4,HAND1,SP3,JMY,CDK12*,HDGFL1*,ZNF335,ZNF653	9	0.32	KDM1A: O60341_p_1_1, RXRB: P28702_p_1_1, ASCL1: P50553_p_1_1, HDGFL1: Q5TGJ6_p_1_1, ARX: Q96QS3_p_3_1, PHOX2B: Q99453_p_1_1; Q99453_p_3_1, RGCC: Q9H4X1_p_1_1, ZNF395: Q9H8N7_p_1_1, CDK12: Q9NYV4_p_1_1
PolyA	GO:0045944	positive regulation of transcription by RNA polymerase II (GO:0045944)	16/908	4.07554e-06	0.00138772	4.42956	54.9731	CASZ1,ZNF395*,KDM1A*,FOXF2,SRF,FOXK2,TCF20,SOX12,ASCL1*,PHOX2B*,RXRB*,RGCC*,HAND1,SP3,CDK12*,ZNF335	7	0.44	KDM1A: O60341_p_1_1, RXRB: P28702_p_1_1, ASCL1: P50553_p_1_1, PHOX2B: Q99453_p_1_1; Q99453_p_3_1, RGCC: Q9H4X1_p_1_1, ZNF395: Q9H8N7_p_1_1, CDK12: Q9NYV4_p_1_1
PolyA	GO:0006355	regulation of transcription, DNA-templated (GO:0006355)	25/2244	2.29189e-05	0.00483759	2.93057	31.3089	RB1,CASZ1,ZNF395*,KDM1A*,SRF,ARX*,FOXK2,TCF20,ASCL1*,HOXA11,RXRB*,DACH1,SAMD1,FOXF2,ZFP91,SOX12,ARID1A,PHOX2B*,NCOR1,SP4,HAND1,SP3,JMY,HDGFL1*,ZNF653	7	0.28	KDM1A: O60341_p_1_1, RXRB: P28702_p_1_1, ASCL1: P50553_p_1_1, HDGFL1: Q5TGJ6_p_1_1, ARX: Q96QS3_p_3_1, PHOX2B: Q99453_p_1_1; Q99453_p_3_1, ZNF395: Q9H8N7_p_1_1
PolyA	GO:0045893	positive regulation of transcription, DNA-templated (GO:0045893)	17/1183	2.84146e-05	0.00483759	3.59525	37.6373	CASZ1,ZNF395*,KDM1A*,FOXF2,SRF,FOXK2,TCF20,SOX12,ARID1A,ASCL1*,PHOX2B*,HOXA11,RXRB*,RGCC*,HAND1,SP3,ZNF335	6	0.35	KDM1A: O60341_p_1_1, RXRB: P28702_p_1_1, ASCL1: P50553_p_1_1, PHOX2B: Q99453_p_1_1; Q99453_p_3_1, RGCC: Q9H4X1_p_1_1, ZNF395: Q9H8N7_p_1_1
PolyA	GO:1903507	negative regulation of nucleic acid-templated transcription (GO:1903507)	10/464	5.93369e-05	0.00808168	5.16241	50.242	RB1,DACH1,NCOR1,KDM1A*,HAND1,SP3,FOXK2,ASCL1*,SAMD1,ZNF653	2	0.2	KDM1A: O60341_p_1_1, ASCL1: P50553_p_1_1
PolyA	GO:0048483	autonomic nervous system development (GO:0048483)	3/21	0.000121824	0.013827	36.8315	331.96	ARX*,ASCL1*,PHOX2B*	3	1	ASCL1: P50553_p_1_1, ARX: Q96QS3_p_3_1, PHOX2B: Q99453_p_1_1; Q99453_p_3_1
PolyA	GO:0060255	regulation of macromolecule metabolic process (GO:0060255)	6/200	0.000343469	0.0334146	7.00782	55.8973	MTMR1,HNRNPDL,KHSRP,ASCL1*,ZNF335,PHOX2B*	2	0.33	ASCL1: P50553_p_1_1, PHOX2B: Q99453_p_1_1; Q99453_p_3_1
PolyA	GO:0003357	noradrenergic neuron differentiation (GO:0003357)	2/7	0.000442432	0.037662	87.4813	675.638	ASCL1*,PHOX2B*	2	1	ASCL1: P50553_p_1_1, PHOX2B: Q99453_p_1_1; Q99453_p_3_1
PolyK	GO:0007399	nervous system development (GO:0007399)	13/447	5.77053e-08	3.04107e-05	7.99318	133.23	SRRM4,PCDHA11,PCDHA10,NAV3,PCDHA1,PCDHA5,PCDHA4,PCDHA3,PCDHA2,PCDHA8,PCDHA7,PCDHAC1,PCDHA6	0	0
PolyK	GO:0006396	RNA processing (GO:0006396)	7/179	1.21177e-05	0.00235227	10.1703	115.136	SRRM4,SON,DKC1,RP9*,ZCRB1,SLU7*,SRRM1	2	0.29	SLU7: O95391_p_1_1, RP9: Q8TA86_p_2_1; Q8TA86_p_3_1
PolyK	GO:0006360	transcription by RNA polymerase I (GO:0006360)	4/34	1.33905e-05	0.00235227	32.3317	362.793	TCOF1,POLR1F,POLR1G,TTF1	0	0
PolyK	GO:0006397	mRNA processing (GO:0006397)	8/300	4.49526e-05	0.0059225	6.89217	68.9899	SRRM4,SON,RBMX2,CWF19L2*,ZCRB1,GTF2F1,SLU7*,SRRM1	2	0.25	SLU7: O95391_p_1_1, CWF19L2: Q2TBE0_p_1_1
PolyK	GO:0022400	regulation of rhodopsin mediated signaling pathway (GO:0022400)	3/25	0.000164872	0.0159173	32.6813	284.665	NMT1,NMT2,METAP2	0	0
PolyK	GO:0021895	cerebral cortex neuron differentiation (GO:0021895)	2/5	0.000181222	0.0159173	158.024	1361.5	CHD5,TOX	0	0
PolyK	GO:0006363	termination of RNA polymerase I transcription (GO:0006363)	3/30	0.000286553	0.0215733	26.6225	217.175	POLR1F,POLR1G,TTF1	0	0
PolyK	GO:0000377	RNA splicing, via transesterification reactions with bulged adenosine as nucleophile (GO:0000377)	6/251	0.000748513	0.0443154	6.02112	43.3366	RBMX2,CWF19L2*,ZCRB1,GTF2F1,SLU7*,SRRM1	2	0.33	SLU7: O95391_p_1_1, CWF19L2: Q2TBE0_p_1_1
PolyK	GO:0008380	RNA splicing (GO:0008380)	4/98	0.000846305	0.0443154	10.2854	72.7655	RP9*,ZCRB1,SLU7*,SRRM1	2	0.5	SLU7: O95391_p_1_1, RP9: Q8TA86_p_2_1; Q8TA86_p_3_1
PolyK	GO:1904871	positive regulation of protein localization to Cajal body (GO:1904871)	2/11	0.000980132	0.0443154	52.6587	364.81	DKC1,LARP7	0	0
PolyK	GO:1904869	regulation of protein localization to Cajal body (GO:1904869)	2/11	0.000980132	0.0443154	52.6587	364.81	DKC1,LARP7	0	0
PolyK	GO:0031126	sno(s)RNA 3'-end processing (GO:0031126)	2/12	0.00117288	0.0443154	47.3905	319.805	DKC1,LARP7	0	0
PolyK	GO:0034244	negative regulation of transcription elongation from RNA polymerase II promoter (GO:0034244)	2/12	0.00117288	0.0443154	47.3905	319.805	LARP7,EAPP	0	0
PolyK	GO:0000398	mRNA splicing, via spliceosome (GO:0000398)	6/274	0.00117726	0.0443154	5.49795	37.0813	RBMX2,CWF19L2*,ZCRB1,GTF2F1,SLU7*,SRRM1	2	0.33	SLU7: O95391_p_1_1, CWF19L2: Q2TBE0_p_1_1
PolyH	GO:0006355	regulation of transcription, DNA-templated (GO:0006355)	30/2244	3.23159e-14	1.75799e-11	8.57917	266.497	DLX2,ONECUT2,CHD8,FOXG1,ONECUT1,GATA6,MEOX2,NLK,YY1,MECP2,RBM15B,ZIC3,HOXA1,OTX1,RNF111,BRD4,FOXB2,CBX4,FOXF2,ZNF281,DYRK1A,POU3F1,MAFA,POU4F1,POU3F3,POU4F2,MAF,NR4A3,MAFB,VGLL3	0	0
PolyH	GO:0006357	regulation of transcription by RNA polymerase II (GO:0006357)	29/2206	1.74042e-13	4.73393e-11	8.16031	239.746	DLX2,ONECUT2,TNKS,CHD8,FOXG1,ONECUT1,GATA6,MEOX2,YY1,MECP2,ZIC3,HOXA1,OTX1,RNF111,BRD4,FOXB2,CBX4,FOXF2,AUTS2,ZNF281,POU3F1,MAFA,POU4F1,POU3F3,POU4F2,MAF,NR4A3,MAFB,VGLL3	0	0
PolyH	GO:0045893	positive regulation of transcription, DNA-templated (GO:0045893)	22/1183	5.74586e-13	1.04192e-10	9.88568	278.629	ONECUT2,FOXF2,AUTS2,TNKS,CHD8,ZNF281,ONECUT1,DYRK1A,GATA6,MEOX2,POU3F1,POU4F1,POU3F3,POU4F2,YY1,NR4A3,MAFB,ZIC3,HOXA1,OTX1,RNF111,BRD4	0	0
PolyH	GO:0045944	positive regulation of transcription by RNA polymerase II (GO:0045944)	17/908	4.34987e-10	5.91583e-08	8.86554	191.103	ONECUT2,FOXF2,AUTS2,TNKS,CHD8,ONECUT1,GATA6,MEOX2,POU4F1,POU4F2,YY1,NR4A3,ZIC3,HOXA1,OTX1,RNF111,BRD4	0	0
PolyH	GO:1903508	positive regulation of nucleic acid-templated transcription (GO:1903508)	11/511	2.09237e-07	2.2765e-05	9.10051	139.964	MAFB,FOXF2,ZIC3,CHD8,ZNF281,DYRK1A,GATA6,POU3F1,RNF111,POU3F3,BRD4	0	0
PolyH	GO:0045892	negative regulation of transcription, DNA-templated (GO:0045892)	13/948	2.43252e-06	0.000220548	5.87263	75.9131	DLX2,CBX4,CHD8,ZNF281,FOXG1,GATA6,POU4F1,POU3F3,POU4F2,YY1,MECP2,RBM15B,NR4A3	0	0
PolyH	GO:0000122	negative regulation of transcription by RNA polymerase II (GO:0000122)	10/684	2.42505e-05	0.00188461	5.95574	63.2921	YY1,MECP2,DLX2,NR4A3,CBX4,CHD8,ZNF281,GATA6,POU4F1,POU4F2	0	0
PolyH	GO:1903507	negative regulation of nucleic acid-templated transcription (GO:1903507)	8/464	5.47586e-05	0.00372358	6.83719	67.0905	MECP2,RBM15B,CBX4,CHD8,ZNF281,FOXG1,GATA6,POU3F3	0	0
PolyH	GO:0045670	regulation of osteoclast differentiation (GO:0045670)	3/36	0.000154383	0.0085039	32.9074	288.798	MAFB,POU4F1,POU4F2	0	0
PolyH	GO:2000113	negative regulation of cellular macromolecule biosynthetic process (GO:2000113)	8/547	0.000171183	0.0085039	5.7597	49.9526	MECP2,RBM15B,CBX4,CHD8,ZNF281,FOXG1,GATA6,POU3F3	0	0
PolyH	GO:0060292	long-term synaptic depression (GO:0060292)	2/7	0.000171954	0.0085039	142.407	1234.43	PRRT1,PLK2	0	0
PolyH	GO:0048565	digestive tract development (GO:0048565)	3/40	0.000211878	0.00960513	29.344	248.235	ZIC3,CHD8,GATA6	0	0
PolyH	GO:0010468	regulation of gene expression (GO:0010468)	11/1079	0.000235389	0.0098501	4.13607	34.5538	YY1,MECP2,MAFB,ZNF281,ONECUT1,PRDM13,POU3F1,NLK,MAFA,POU4F1,POU3F3	0	0
PolyH	GO:0099601	regulation of neurotransmitter receptor activity (GO:0099601)	3/58	0.00063768	0.0247784	19.7226	145.113	PRRT1,DLGAP3,SHANK1	0	0
PolyH	GO:0018107	peptidyl-threonine phosphorylation (GO:0018107)	3/60	0.000704303	0.0255427	19.0287	138.116	TNKS,DYRK1A,NLK	0	0
PolyH	GO:0045672	positive regulation of osteoclast differentiation (GO:0045672)	2/15	0.000847044	0.0287995	54.75	387.288	POU4F1,POU4F2	0	0
PolyH	GO:0018210	peptidyl-threonine modification (GO:0018210)	3/67	0.000971901	0.0311008	16.9415	117.51	TNKS,DYRK1A,NLK	0	0
PolyH	GO:0007417	central nervous system development (GO:0007417)	5/268	0.00106835	0.0311847	7.05897	48.2949	DLX2,ZIC3,CHD8,FOXG1,POU3F3	0	0
PolyH	GO:0018105	peptidyl-serine phosphorylation (GO:0018105)	4/156	0.00108917	0.0311847	9.64425	65.7963	TNKS,PLK2,DYRK1A,NLK	0	0
PolyH	GO:0050905	neuromuscular process (GO:0050905)	2/19	0.00136923	0.0372431	41.8592	275.999	HOXA1,SHANK1	0	0
PolyH	GO:0010971	positive regulation of G2/M transition of mitotic cell cycle (GO:0010971)	2/20	0.00151854	0.0393374	39.5317	256.561	MECP2,BRD4	0	0
PolyH	GO:0071392	cellular response to estradiol stimulus (GO:0071392)	2/21	0.00167527	0.0396237	37.4492	239.367	POU4F1,POU4F2	0	0
PolyH	GO:2000679	positive regulation of transcription regulatory region DNA binding (GO:2000679)	2/21	0.00167527	0.0396237	37.4492	239.367	POU4F1,POU4F2	0	0
PolyH	GO:1902751	positive regulation of cell cycle G2/M phase transition (GO:1902751)	2/23	0.0020108	0.0455781	33.8793	210.364	MECP2,BRD4	0	0
PolyH	GO:0045665	negative regulation of neuron differentiation (GO:0045665)	2/24	0.00218952	0.0458115	32.3377	198.038	DLX2,POU4F2	0	0
PolyH	GO:0050805	negative regulation of synaptic transmission (GO:0050805)	2/24	0.00218952	0.0458115	32.3377	198.038	PRRT1,PLK2	0	0
PolyH	GO:2000311	regulation of AMPA receptor activity (GO:2000311)	2/25	0.00237549	0.0470108	30.9301	186.897	PRRT1,SHANK1	0	0
PolyH	GO:0010605	negative regulation of macromolecule metabolic process (GO:0010605)	4/194	0.00241967	0.0470108	7.70058	46.3893	YY1,MECP2,ZNF281,POU4F1	0	0

## Sheet: MF
poly type	GO id	GO term	Overlap	p-value	adj p-value	odds ratio	combined score	enriched genes	count genes helix	fraction genes helix	enriched genes helix
PolyP	GO:0017124	SH3 domain binding (GO:0017124)	14/62	2.45766e-12	4.65421e-10	17.1193	457.629	WIPF1,SGIP1,WAS,DAB2IP,CBLB,ESPN,CBL,ENAH,ABI2,ABI1,EVL,SOCS7,WASF2,REPS1	0	0
PolyP	GO:0043565	sequence-specific DNA binding (GO:0043565)	42/707	3.7534e-12	4.65421e-10	3.91889	103.099	BARHL2,CEBPB,MYRF,ONECUT3,FOXG1,ARX,RAX,SCX,FOXK1,NR3C2,NEUROD2,GBX2,HES1,ZBTB7B,PITX1,HES7,TBX1,EGR2,SKOR1,CDX2,IRX5,PRRX2,PDX1,EN1,ZBTB12,RFX1,ZIC5,POU3F1,POU3F2,POU3F3,KLF16,KLF2,NFATC4,NR5A1,WT1,HOXB4,ERF,FOSB,HOXB2,HOXD3,HOXD8,TAF1	0	0
PolyP	GO:0000977	RNA polymerase II transcription regulatory region sequence-specific DNA binding (GO:0000977)	59/1359	6.02978e-11	4.33459e-09	2.882	67.8185	RB1,HMX3,BARHL2,ONECUT3,RAX,SCX,NR3C2,SALL2,DMRTB1,ZNF526,PITX1,HES7,KDM6B,ZBTB39,EN1,RFX1,POU3F1,POU3F2,POU3F3,KLF16,NR5A1,RBL2,HOXB4,HOXB2,CEBPA,CEBPB,SATB2,ARX,MAZ,FOXK1,NEUROD2,GBX2,GBX1,ZNF628,ATOH8,HES1,ZBTB7B,NKX2-4,FOXB2,TBX1,ZNF341,EGR2,SKOR1,MYPOP,CDX2,IRX5,PRRX2,PDX1,ZBTB12,ZIC5,KLF2,NFATC4,NFIA,WT1,FOSB,SP5,HOXD3,HOXD8,TAF1	0	0
PolyP	GO:1990837	sequence-specific double-stranded DNA binding (GO:1990837)	40/712	6.99128e-11	4.33459e-09	3.66806	85.773	BARHL2,CEBPA,CEBPB,ONECUT3,FOXG1,ARX,RAX,FOXK1,NR3C2,NEUROD2,GBX2,HES1,ZBTB7B,PITX1,HES7,TSPYL2,TBX1,EGR2,SKOR1,CDX2,IRX5,PRRX2,PDX1,EN1,ZBTB12,RFX1,ZIC5,POU3F1,POU3F2,KLF16,KLF2,NFATC4,HNRNPL,NR5A1,WT1,HOXB4,FOSB,HOXB2,HOXD3,HOXD8	0	0
PolyP	GO:0003690	double-stranded DNA binding (GO:0003690)	37/651	2.76803e-10	1.37294e-08	3.68888	81.1838	BARHL2,CEBPB,ONECUT3,FOXG1,ARX,RAX,FOXK1,NR3C2,NEUROD2,GBX2,HES1,ZBTB7B,PITX1,HES7,TBX1,EGR2,SKOR1,CDX2,IRX5,PRRX2,PDX1,EN1,ZBTB12,RFX1,ZIC5,POU3F1,POU3F2,KLF16,KLF2,NFATC4,NR5A1,WT1,HOXB4,FOSB,HOXB2,HOXD3,HOXD8	0	0
PolyP	GO:0000978	RNA polymerase II cis-regulatory region sequence-specific DNA binding (GO:0000978)	50/1149	2.00413e-09	8.28373e-08	2.8325	56.7295	ONECUT3,RAX,SCX,NR3C2,SALL2,DMRTB1,ZNF526,PITX1,HES7,KDM6B,ZBTB39,EN1,RFX1,POU3F1,POU3F2,POU3F3,KLF16,NR5A1,HOXB4,HOXB2,CEBPA,CEBPB,SATB2,MAZ,FOXK1,NEUROD2,ZNF628,ATOH8,HES1,ZBTB7B,NKX2-4,FOXB2,TBX1,ZNF341,EGR2,SKOR1,MYPOP,CDX2,IRX5,PRRX2,PDX1,ZBTB12,ZIC5,KLF2,NFATC4,NFIA,WT1,FOSB,SP5,HOXD3	0	0
PolyP	GO:0000987	cis-regulatory region sequence-specific DNA binding (GO:0000987)	49/1149	5.72347e-09	2.02774e-07	2.7639	52.4553	ONECUT3,RAX,NR3C2,SALL2,DMRTB1,ZNF526,PITX1,HES7,KDM6B,ZBTB39,EN1,RFX1,POU3F1,POU3F2,POU3F3,KLF16,NR5A1,HOXB4,HOXB2,CEBPA,CEBPB,SATB2,MAZ,FOXK1,NEUROD2,ZNF628,ATOH8,HES1,ZBTB7B,NKX2-4,FOXB2,TBX1,ZNF341,EGR2,SKOR1,MYPOP,CDX2,IRX5,PRRX2,PDX1,ZBTB12,ZIC5,KLF2,NFATC4,NFIA,WT1,FOSB,SP5,HOXD3	0	0
PolyP	GO:0003723	RNA binding (GO:0003723)	48/1406	5.64639e-06	0.000175038	2.15541	26.047	RBM27,DIDO1,DAZAP1,SF3B2,KHDRBS2,KHDRBS3,NUFIP1,PPP1R10,ZC3H4,MAZ,AKAP8L,TCF20,CASC3,VIRMA,RTN4,STIP1,RBM15B,FAM120C,PEG10,RBBP6,PELP1,RBM33,DDX17,SRPK2,ZC3H10,SCAF11,RDX,ZFR,YLPM1,RC3H1,ALG13,MEX3D,MEX3C,HNRNPL,DIAPH1,EIF5,HNRNPK,HNRNPUL1,ESRP2,ZYX,ACIN1,ZNF579,NAF1,CDK13,R3HDM1,CPEB2,SF1,TNRC6B	0	0
PolyP	GO:0008353	RNA polymerase II CTD heptapeptide repeat kinase activity (GO:0008353)	4/12	3.99338e-05	0.0011004	28.5523	289.186	CCNK,CDK12,CDK13,BRD4	0	0
PolyP	GO:0030156	benzodiazepine receptor binding (GO:0030156)	3/5	5.08899e-05	0.00126207	85.4348	844.595	RIMBP3,RIMBP3C,RIMBP3B	0	0
PolyP	GO:0045296	cadherin binding (GO:0045296)	16/322	0.000178619	0.00402704	3.04685	26.2951	NOTCH3,CTNND2,RDX,DAB2IP,ASAP1,CBL,RTN4,SHTN1,AFDN,EIF5,HNRNPK,DIAPH3,FMNL2,ABI1,WASF2,DBN1	0	0
PolyP	GO:0000976	transcription cis-regulatory region binding (GO:0000976)	22/549	0.000268348	0.00539202	2.44904	20.139	RB1,HMX3,BARHL2,CEBPA,EGR2,CEBPB,CDX2,SATB2,ARX,SCX,FOXK1,HNRNPL,NR5A1,RBL2,GBX2,SALL2,GBX1,WT1,HOXD3,ZBTB7B,TAF4,HOXD8	0	0
PolyP	GO:0003779	actin binding (GO:0003779)	11/177	0.000282646	0.00539202	3.83158	31.309	CAP1,RDX,MICAL3,SHROOM2,COBL,FMN2,FHDC1,DBN1,CDK5R2,LMOD2,CAP2	0	0
PolyP	GO:0030971	receptor tyrosine kinase binding (GO:0030971)	6/56	0.000414715	0.00734638	6.87789	53.5645	IRS1,TRADD,CBLB,CBL,TOB1,SH2B1	0	0
PolyP	GO:0003677	DNA binding (GO:0003677)	28/811	0.000472645	0.0078144	2.1086	16.1459	CEBPA,CEBPB,NUFIP1,MYRF,FOXG1,SCX,ZMYM3,HES1,HES7,TBX1,ZNF341,EGR2,MBD5,SMARCA5,POU3F1,ARID1A,POU3F2,POU3F3,KLF2,ACR,NR5A1,WT1,KAT6A,ERF,FOSB,HOXB2,TAF4,TAF1	0	0
PolyP	GO:0034237	protein kinase A regulatory subunit binding (GO:0034237)	4/22	0.00051427	0.00797118	12.6835	96.0489	AKAP8L,WASF1,WASF2,WASF3	0	0
PolyP	GO:0005068	transmembrane receptor protein tyrosine kinase adaptor activity (GO:0005068)	3/12	0.00102244	0.0149156	18.9787	130.679	IRS1,TRADD,SH2B1	0	0
PolyP	GO:0061629	RNA polymerase II-specific DNA-binding transcription factor binding (GO:0061629)	10/190	0.00187704	0.0258614	3.20053	20.0931	RB1,RBL2,EGR2,ATN1,HES1,ARID1A,TAF4,PITX1,ZFPM1,TAF1	0	0
PolyP	GO:0061659	ubiquitin-like protein ligase activity (GO:0061659)	12/270	0.00285875	0.0373142	2.68466	15.7251	EGR2,RNF215,RC3H1,DTX1,CBLB,RBBP6,DTX3,UBR1,CBL,CBLL1,MEX3C,IRF2BPL	0	0
PolyP	GO:0140297	DNA-binding transcription factor binding (GO:0140297)	10/208	0.00360921	0.0447542	2.90688	16.3491	RB1,RBL2,EGR2,CRTC1,ATN1,SCX,HES1,ZFPM1,PITX1,TAF1	0	0
PolyE	GO:0003723	RNA binding (GO:0003723)	62/1406	1.3078e-10	4.17188e-08	2.7388	62.3283	ISY1,RBM25*,SLC4A1AP,TUT7,HMGB2,HNRNPU,HMGB3*,PWP2,KRI1,RRP8,GPATCH8,RRP9,CWC22,DHX16,SNIP1*,RRP12*,SEC63,RBM6,PELP1*,EIF5B,RBM19*,PUS7,RANGAP1*,PDIA4,FTSJ3*,PATL2,HNRNPUL2*,GRWD1,NCL,NCBP3*,SF3B2,DDX24,YTHDC1*,NOP2,NOLC1,SUPT6H,RTN4,HSP90B1,PES1*,DHX37,DROSHA*,CFAP65,RBM10*,PPARGC1B*,ABCF1,SF3A3*,NOP58,PRPF38A*,NPM2*,UTP3,NOC3L*,DEK*,SUPT5H,CDK11B,MFAP1,ACIN1,L1TD1,HDGF,EIF3D*,SHFL*,DZIP3,EIF4G1	22	0.35	PES1: O00541_p_1_1, HMGB3: O15347_p_1_1, EIF3D: O15371_p_1_1, DEK: P35659_p_1_1, RANGAP1: P46060_p_2_1; P46060_p_3_1; P46060_p_4_1, RBM25: P49756_p_1_1, RBM10: P98175_p_2_1, SF3A3: Q12874_p_1_1, HNRNPUL2: Q1KMD3_p_1_1, NCBP3: Q53F19_p_1_1, RRP12: Q5JTH9_p_1_1, NPM2: Q86SE8_p_1_1; Q86SE8_p_2_1, PPARGC1B: Q86YN6_p_1_1, FTSJ3: Q8IY81_p_1_1, PELP1: Q8IZL8_p_2_1; Q8IZL8_p_3_1; Q8IZL8_p_4_1; Q8IZL8_p_5…
PolyE	GO:0003677	DNA binding (GO:0003677)	35/811	3.22433e-06	0.000514281	2.53843	32.0979	GTF3C3,CSRNP3*,GTF3C5,POGK*,TSHZ2,HMGB2,HNRNPU,HMGB3*,PRDM2,CHD4,ZBTB22,PDS5B,ZBTB4,CENPB,NEUROD1,TRIM26*,CLSPN,RBM6,MBD3,APLP2,ARID3A,SOX12,ZBTB33,ZNF35,SMARCA2,SMARCA4,ZEB2,KAT6A*,TIMELESS*,ZNF316,HDGF,IRF5*,ZNF513,ERCC6,GZF1	7	0.2	HMGB3: O15347_p_1_1, TRIM26: Q12899_p_2_1, IRF5: Q13568_p_1_1, CSRNP3: Q8WYN3_p_2_1, KAT6A: Q92794_p_1_1, POGK: Q9P215_p_1_1, TIMELESS: Q9UNS1_p_1_1
PolyE	GO:0043565	sequence-specific DNA binding (GO:0043565)	30/707	2.29506e-05	0.00244042	2.4702	26.3871	ZNF771,CSRNP3*,HNRNPU,PRDM2,ZBTB22,ZBTB4,CENPB,FERD3L,NEUROD1,NEUROD2,BBX,ZBTB7B,PKNOX2,UPF2,MBD3,KDM2A,BCL11B*,SOX12,RFX1*,ZBTB33,ZNF35,ZEB2,NCL,TET3,ZNF316,TERF2IP,IRF5*,HOXB7,NEUROG2,GZF1	4	0.13	RFX1: P22670_p_3_1, IRF5: Q13568_p_1_1, CSRNP3: Q8WYN3_p_2_1, BCL11B: Q9C0K0_p_1_1
PolyS	GO:0000987	cis-regulatory region sequence-specific DNA binding (GO:0000987)	36/1149	5.06284e-08	4.87581e-06	3.07855	51.7158	FOXC1,DLX2,ONECUT1,GATA6,HOXD13,BHLHE22*,GLI1,ZBTB4,SALL1,DACH1,ZNF865,E2F4,NKX6-1,SOX4,MEF2A,KDM6B,EGR1,KLF12,FOXF2,TFE3*,POU6F2,SOX11,OLIG1,NR1D1,FOXN3,SREBF2,POU4F2,THRAP3,SP4,BCL6B,HOXD4,GTF2IRD1,SP8,INSM2,NFE2L1,IRF9	2	0.06	TFE3: P19532_p_1_1, BHLHE22: Q8NFJ8_p_4_1
PolyS	GO:0043565	sequence-specific DNA binding (GO:0043565)	27/707	5.92123e-08	4.87581e-06	3.6971	61.5277	CSRNP1,FOXC1,DLX2,ONECUT1,GATA6,HOXD13,PRDM2,ZBTB22,BHLHE22*,ZBTB4,CXXC4,CUX2,E2F4,SOX4,MEF2A,EGR1,KLF12,FOXF2,TFE3*,NR1D1,SREBF2,SP4,BCL6B,ERF,HOXD4,SP8,IRF9	2	0.07	TFE3: P19532_p_1_1, BHLHE22: Q8NFJ8_p_4_1
PolyS	GO:0003677	DNA binding (GO:0003677)	29/811	7.57898e-08	4.87581e-06	3.4684	56.8654	CSRNP1,FOXC1,TSHZ3,CHD8,XPC,HOXD13,PRDM2,RTF1,ZBTB22,GLI1,ZBTB4,CUX2,SNAPC4,CAMTA2,E2F4,HNRNPA1,MEF2A,EGR1,KLF12,FOXF2,ARID3B,ARID1A,THRAP3,MSH4,SP4,SPRTN,ERF,HDGFL2,CUL4B	0	0
PolyS	GO:0000977	RNA polymerase II transcription regulatory region sequence-specific DNA binding (GO:0000977)	39/1359	1.32746e-07	6.07121e-06	2.82412	44.7194	FOXC1,DLX2,ONECUT1,GATA6,HOXD13,PRDM2,ZBTB22,BHLHE22*,GLI1,ZBTB4,NPAS1,CUX2,SALL1,DACH1,ZNF865,E2F4,NKX6-1,SOX4,MEF2A,KDM6B,EGR1,KLF12,FOXF2,TFE3*,POU6F2,SOX11,OLIG1,NR1D1,SREBF2,POU4F2,THRAP3,SP4,BCL6B,HOXD4,GTF2IRD1,SP8,INSM2,NFE2L1,IRF9	2	0.05	TFE3: P19532_p_1_1, BHLHE22: Q8NFJ8_p_4_1
PolyS	GO:0000978	RNA polymerase II cis-regulatory region sequence-specific DNA binding (GO:0000978)	35/1149	1.57285e-07	6.07121e-06	2.97501	46.6042	FOXC1,DLX2,ONECUT1,GATA6,HOXD13,BHLHE22*,GLI1,ZBTB4,SALL1,DACH1,ZNF865,E2F4,NKX6-1,SOX4,MEF2A,KDM6B,EGR1,KLF12,FOXF2,TFE3*,POU6F2,SOX11,OLIG1,NR1D1,SREBF2,POU4F2,THRAP3,SP4,BCL6B,HOXD4,GTF2IRD1,SP8,INSM2,NFE2L1,IRF9	2	0.06	TFE3: P19532_p_1_1, BHLHE22: Q8NFJ8_p_4_1
PolyS	GO:0000976	transcription cis-regulatory region binding (GO:0000976)	19/549	2.37802e-05	0.000687604	3.23786	34.4724	MEF2A,EGR1,FOXC1,FOXF2,TFE3*,GATA6,SOX11,PRDM2,ARID4B,NR1D1,ZBTB22,FOXN3,GLI1,ZBTB4,NPAS1,CUX2,DACH1,HOXD4,SOX4	1	0.05	TFE3: P19532_p_1_1
PolyS	GO:0003690	double-stranded DNA binding (GO:0003690)	21/651	2.4939e-05	0.000687604	3.02338	32.045	EGR1,DLX2,KLF12,TFE3*,ONECUT1,GATA6,HOXD13,NR1D1,ZBTB22,BHLHE22*,SREBF2,CUX2,BCL6B,SPRTN,HOXD4,CAMTA2,SP8,E2F4,HDGFL2,SOX4,IRF9	2	0.1	TFE3: P19532_p_1_1, BHLHE22: Q8NFJ8_p_4_1
PolyS	GO:1990837	sequence-specific double-stranded DNA binding (GO:1990837)	22/712	3.05345e-05	0.000736646	2.89659	30.1148	EGR1,FOXC1,DLX2,KLF12,TFE3*,ONECUT1,GATA6,SOX11,HOXD13,ARID4B,NR1D1,ZBTB22,BHLHE22*,GLI1,SREBF2,CUX2,BCL6B,HOXD4,SP8,E2F4,SOX4,IRF9	2	0.09	TFE3: P19532_p_1_1, BHLHE22: Q8NFJ8_p_4_1
PolyS	GO:0099122	RNA polymerase II C-terminal domain binding (GO:0099122)	3/8	8.26536e-05	0.00158641	51.7808	486.784	PCIF1,RTF1,SCAF1	0	0
PolyS	GO:0140033	acetylation-dependent protein binding (GO:0140033)	4/21	9.04173e-05	0.00158641	20.3829	189.786	BRD3,BRD2,MLLT3,BRDT	0	0
PolyS	GO:0070577	lysine-acetylated histone binding (GO:0070577)	4/21	9.04173e-05	0.00158641	20.3829	189.786	BRD3,BRD2,MLLT3,BRDT	0	0
PolyS	GO:0001227	DNA-binding transcription repressor activity, RNA polymerase II-specific (GO:0001227)	11/256	0.0002096	0.00337107	3.96626	33.5954	KLF12,DACH1,BCL6B,ERF,GTF2IRD1,PRDM2,INSM2,NR1D1,ZBTB4,SREBF2,POU4F2	0	0
PolyS	GO:0046966	thyroid hormone receptor binding (GO:0046966)	4/28	0.000290237	0.00430891	14.4327	117.552	MED1,THRAP3,GAS2L1,MED4	0	0
PolyS	GO:0042809	vitamin D receptor binding (GO:0042809)	3/14	0.000510265	0.00696437	23.5296	178.368	MED1,THRAP3,MED4	0	0
PolyS	GO:0001228	DNA-binding transcription activator activity, RNA polymerase II-specific (GO:0001228)	12/333	0.000541272	0.00696437	3.3045	24.8551	MEF2A,EGR1,FOXC1,FOXF2,ONECUT1,SOX11,HOXD4,HOXD13,PRDM2,E2F4,SOX4,POU4F2	0	0
PolyS	GO:0001067	transcription regulatory region nucleic acid binding (GO:0001067)	9/212	0.000854898	0.0103122	3.88975	27.4792	EGR1,FOXC1,TFE3*,GATA6,SOX11,ARID4B,NR1D1,GLI1,SOX4	1	0.11	TFE3: P19532_p_1_1
PolyS	GO:1990269	RNA polymerase II C-terminal domain phosphoserine binding (GO:1990269)	2/5	0.00130928	0.0140384	57.2899	380.306	PCIF1,RTF1	0	0
PolyS	GO:0042030	ATPase inhibitor activity (GO:0042030)	2/5	0.00130928	0.0140384	57.2899	380.306	TSC1,FNIP2	0	0
PolyS	GO:0030374	nuclear receptor coactivator activity (GO:0030374)	4/53	0.00331083	0.0336311	7.06015	40.3174	MED1,THRAP3,MED4,PPRC1	0	0
PolyS	GO:0003723	RNA binding (GO:0003723)	28/1406	0.00361685	0.0349026	1.83173	10.2982	NUFIP2,NOLC1,TCF20,RTF1,HNRNPLL,GTF2E2,ZFP36L1,PNN,UBTF,HNRNPA1,NANOS1,SRRM4,ZRANB2,YLPM1,PPRC1,CKAP4,JMJD6,SRRM1,FAM133B,MEX3B,MEX3A,THRAP3,ACIN1,RNPS1,RP9,NAF1,PPIG,CDK13	0	0
PolyS	GO:0050815	phosphoserine residue binding (GO:0050815)	2/9	0.00457114	0.0420109	24.5478	132.264	PCIF1,RTF1	0	0
PolyG	GO:1990837	sequence-specific double-stranded DNA binding (GO:1990837)	41/712	2.92256e-21	6.28351e-19	8.06684	381.415	CREBZF,HDAC5,DLX2,FOXC1,ONECUT2,SHOX2,LEF1,HNRNPU,BHLHE22,HOXC13,HOXA10,DHX36,NKX2-1,SHOX,ZNF746,SOX7,MNX1,SOX4,EGR1,ZNF384,SKOR1,TCF7L1,GSX1,ZNF282,ZNF281,FOXL2,RFX1,POU3F1,SMAD6,POU2F2,POU3F2,POU4F1,PHOX2B,PHOX2A,HNRNPL,SFPQ,NR6A1,TAL1,SP3,SP8,HOXD9	0	0
PolyG	GO:0043565	sequence-specific DNA binding (GO:0043565)	36/707	5.61707e-17	6.03835e-15	6.84697	256.201	DLX2,FOXC1,ONECUT2,SHOX2,LEF1,HNRNPU,BHLHE22,HOXC13,HOXA10,SHOX,SOX7,MNX1,SOX4,EGR1,ZNF384,SKOR1,TCF7L1,FOXD1,FOXF2,GSX1,ZNF282,FOXF1,ZNF281,FOXL2,RFX1,POU3F1,POU2F2,POU3F2,POU4F1,POU3F3,PHOX2B,PHOX2A,NR6A1,SP3,SP8,HOXD9	0	0
PolyG	GO:0000977	RNA polymerase II transcription regulatory region sequence-specific DNA binding (GO:0000977)	48/1359	3.65927e-16	2.62248e-14	4.9091	174.489	HDAC5,DLX2,FOXC1,ONECUT2,LEF1,HNRNPU,BHLHE22,HOXC13,NPAS3,HOXA10,PURA,SOX1,DACH1,ZIC2,GBX1,DHX36,NKX1-2,NKX2-1,ZNF746,SOX7,SOX4,EGR1,ZNF384,SKOR1,TCF7L1,FOXD1,FOXF2,GSX1,ZNF282,FOXF1,ZNF281,ZBTB10,FOXL2,RFX1,POU3F1,POU2F2,POU3F2,POU4F1,POU3F3,PHOX2B,POU4F2,PHOX2A,NR6A1,TAL1,SP3,HOXB3,SP8,HOXD9	0	0
PolyG	GO:0003690	double-stranded DNA binding (GO:0003690)	32/651	1.01481e-14	4.35931e-13	6.44357	207.622	DLX2,ONECUT2,SHOX2,LEF1,HNRNPU,BHLHE22,HOXC13,HOXA10,PURA,SHOX,SOX7,MNX1,SOX4,EGR1,ZNF384,SKOR1,TCF7L1,GSX1,ZNF282,ZNF281,FOXL2,RFX1,POU3F1,POU2F2,POU3F2,POU4F1,PHOX2B,PHOX2A,NR6A1,SP3,SP8,HOXD9	0	0
PolyG	GO:0000978	RNA polymerase II cis-regulatory region sequence-specific DNA binding (GO:0000978)	42/1149	1.21655e-14	4.35931e-13	4.92882	157.92	HDAC5,DLX2,FOXC1,ONECUT2,LEF1,HNRNPU,BHLHE22,HOXC13,HOXA10,SOX1,DACH1,ZIC2,DHX36,NKX1-2,NKX2-1,ZNF746,SOX7,SOX4,EGR1,ZNF384,SKOR1,TCF7L1,FOXD1,FOXF2,GSX1,FOXF1,ZNF281,FOXL2,RFX1,POU3F1,POU2F2,POU3F2,POU4F1,POU3F3,PHOX2B,POU4F2,NR6A1,TAL1,SP3,HOXB3,SP8,HOXD9	0	0
PolyG	GO:0000987	cis-regulatory region sequence-specific DNA binding (GO:0000987)	42/1149	1.21655e-14	4.35931e-13	4.92882	157.92	HDAC5,DLX2,FOXC1,ONECUT2,LEF1,HNRNPU,BHLHE22,HOXC13,HOXA10,SOX1,DACH1,ZIC2,DHX36,NKX1-2,NKX2-1,ZNF746,SOX7,SOX4,EGR1,ZNF384,SKOR1,TCF7L1,FOXD1,FOXF2,GSX1,FOXF1,ZNF281,FOXL2,RFX1,POU3F1,POU2F2,POU3F2,POU4F1,POU3F3,PHOX2B,POU4F2,NR6A1,TAL1,SP3,HOXB3,SP8,HOXD9	0	0
PolyG	GO:0000976	transcription cis-regulatory region binding (GO:0000976)	29/549	3.37163e-14	1.03557e-12	6.85358	212.603	CREBZF,HDAC5,FOXC1,LEF1,HOXC13,NPAS3,PURA,DACH1,GBX1,DHX36,NKX2-1,ZNF746,SOX7,SOX4,EGR1,FOXF2,ZNF282,FOXF1,ZNF281,ZBTB10,SMAD6,POU2F2,PHOX2B,PHOX2A,HNRNPL,SFPQ,TAL1,SP3,HOXD9	0	0
PolyG	GO:0001067	transcription regulatory region nucleic acid binding (GO:0001067)	16/212	1.49e-10	4.00437e-09	9.42041	213.156	CREBZF,EGR1,HDAC5,FOXC1,ZNF281,HOXC13,SMAD6,POU2F2,HNRNPL,SFPQ,TAL1,DHX36,NKX2-1,ZNF746,SOX7,SOX4	0	0
PolyG	GO:0003677	DNA binding (GO:0003677)	28/811	2.05649e-09	4.91272e-08	4.30726	86.1549	CREBZF,FOXC1,LEF1,HNRNPU,PURA,SOX1,ZIC2,DHX36,NKX2-1,SHOX,EGR1,TCF7L1,FOXD1,FOXF2,GSX1,FOXF1,ZNF281,FOXL2,ARID3A,POU3F1,POU2F2,ARID1A,POU3F2,POU4F1,POU3F3,SFPQ,NR6A1,FUBP1	0	0
PolyG	GO:0003723	RNA binding (GO:0003723)	33/1406	7.26326e-07	1.5616e-05	2.89692	40.9487	ANKRD17,YTHDC2,MEPCE,SRSF1,HNRNPU,U2AF1,FBLL1,FBL,PURA,DHX57,TRA2B,DHX36,TRA2A,GAR1,RALY,SRSF11,HNRNPA0,DDX17,FUS,SRP68,MEX3D,HNRNPAB,CKAP4,PRRC2A,HNRNPL,MEX3B,SFPQ,MEX3A,FUBP1,MKRN1,FAM98B,KCTD12,CPEB2	0	0
PolyG	GO:0001228	DNA-binding transcription activator activity, RNA polymerase II-specific (GO:0001228)	14/333	3.00587e-06	5.87511e-05	4.9743	63.248	EGR1,ZNF384,FOXC1,FOXF2,ONECUT2,FOXF1,LEF1,POU4F1,PHOX2B,POU4F2,HOXA10,SHOX,HOXB3,SOX4	0	0
PolyG	GO:0035925	mRNA 3'-UTR AU-rich region binding (GO:0035925)	4/22	4.64684e-05	0.000832558	24.1709	241.147	DHX36,MEX3D,CPEB2,HNRNPA0	0	0
PolyG	GO:0070016	armadillo repeat domain binding (GO:0070016)	3/9	6.37984e-05	0.00105513	54.1202	522.79	LEF1,STRN4,STRN3	0	0
PolyG	GO:0036002	pre-mRNA binding (GO:0036002)	4/29	0.000143396	0.00220216	17.3969	153.961	HNRNPL,TRA2B,HNRNPU,U2AF1	0	0
PolyG	GO:0005267	potassium channel activity (GO:0005267)	6/91	0.000206647	0.00296195	7.73686	65.6434	KCNT1,KCNMA1,KCNQ3,KCNN2,KCNK3,HCN1	0	0
PolyG	GO:0042826	histone deacetylase binding (GO:0042826)	6/93	0.000232718	0.00312715	7.55824	63.2298	HOXA10,HDAC5,SFPQ,TAL1,LEF1,DHX36	0	0
PolyG	GO:0008301	DNA binding, bending (GO:0008301)	3/16	0.000405385	0.00512693	24.9697	195.03	FOXC1,FOXD1,LEF1	0	0
PolyG	GO:0008757	S-adenosylmethionine-dependent methyltransferase activity (GO:0008757)	4/43	0.000673226	0.00777626	11.144	81.3893	FBL,CARNMT1,MEPCE,FBLL1	0	0
PolyG	GO:0008173	RNA methyltransferase activity (GO:0008173)	3/19	0.000687204	0.00777626	20.2848	147.732	FBL,MEPCE,FBLL1	0	0
PolyG	GO:0003729	mRNA binding (GO:0003729)	9/263	0.000820589	0.00882133	3.91565	27.8226	HNRNPL,FUBP1,TRA2B,DHX36,SRSF1,HNRNPU,CPEB2,HNRNPAB,HNRNPA0	0	0
PolyG	GO:0005249	voltage-gated potassium channel activity (GO:0005249)	5/82	0.00100825	0.0103226	7.08079	48.8542	KCNT1,KCNMA1,KCNQ3,KCNN2,HCN1	0	0
PolyG	GO:0070034	telomerase RNA binding (GO:0070034)	3/22	0.00106998	0.0104566	17.0794	116.825	DHX36,GAR1,HNRNPU	0	0
PolyG	GO:0003730	mRNA 3'-UTR binding (GO:0003730)	5/85	0.00118526	0.0110796	6.81423	45.9128	DHX36,HNRNPU,MEX3D,CPEB2,HNRNPA0	0	0
PolyG	GO:0051721	protein phosphatase 2A binding (GO:0051721)	3/24	0.00138719	0.0124269	15.4512	101.676	BOD1,STRN4,STRN3	0	0
PolyG	GO:0008649	rRNA methyltransferase activity (GO:0008649)	2/7	0.00175193	0.0150666	43.063	273.323	FBL,FBLL1	0	0
PolyG	GO:0003697	single-stranded DNA binding (GO:0003697)	5/97	0.00212962	0.0176104	5.92181	36.4299	PURA,FUBP1,DHX36,HNRNPU,POU4F1	0	0
PolyG	GO:0017124	SH3 domain binding (GO:0017124)	4/62	0.00265356	0.0211302	7.48617	44.4069	WIPF1,EVL,SOCS7,SHANK1	0	0
PolyG	GO:0034713	type I transforming growth factor beta receptor binding (GO:0034713)	2/9	0.00296673	0.0227802	30.7562	179.01	SMAD6,SMAD7	0	0
PolyG	GO:0042054	histone methyltransferase activity (GO:0042054)	3/32	0.00321908	0.0238656	11.1843	64.1828	SUZ12,FBL,FBLL1	0	0
PolyG	GO:0070742	C2H2 zinc finger domain binding (GO:0070742)	2/12	0.00534013	0.0370364	21.5261	112.635	ZXDA,LEF1	0	0
PolyG	GO:0015269	calcium-activated potassium channel activity (GO:0015269)	2/12	0.00534013	0.0370364	21.5261	112.635	KCNMA1,KCNN2	0	0
PolyG	GO:0070411	I-SMAD binding (GO:0070411)	2/13	0.00627264	0.0421443	19.5682	99.2412	SMAD6,SMAD7	0	0
PolyQ	GO:0061629	RNA polymerase II-specific DNA-binding transcription factor binding (GO:0061629)	10/190	1.25708e-07	2.22504e-05	10.6294	168.895	MEF2A,NCOR2,AR*,CREBBP*,TBP*,NCOR1,NCOA3*,ATN1*,EP300,AR*ID1A	5	0.5	AR: P10275_p_1_1, TBP: P20226_p_1_1, ATN1: P54259_p_4_1, CREBBP: Q92793_p_1_1, NCOA3: Q9Y6Q9_p_1_1
PolyQ	GO:0140297	DNA-binding transcription factor binding (GO:0140297)	10/208	2.91699e-07	2.58154e-05	9.65431	145.274	MEF2A,AR*,PURA*,CREBBP*,TBP*,NCOR1,ZMYND8*,ATN1*,EP300,ASCL1*	7	0.7	AR: P10275_p_1_1, TBP: P20226_p_1_1, ASCL1: P50553_p_2_1, ATN1: P54259_p_4_1, PURA: Q00577_p_3_1, CREBBP: Q92793_p_1_1, ZMYND8: Q9ULU4_p_1_1
PolyQ	GO:0016922	nuclear receptor binding (GO:0016922)	7/120	5.35926e-06	0.000316196	11.556	140.252	MED12,NCOR2,NCOR1,NCOA6*,NCOA3*,EP300,ARID1A	2	0.29	NCOA6: Q14686_p_1_1; Q14686_p_2_1, NCOA3: Q9Y6Q9_p_1_1
PolyQ	GO:1990837	sequence-specific double-stranded DNA binding (GO:1990837)	15/712	1.14697e-05	0.000507534	4.21412	47.939	NFAT5,ZNF384*,TBP*,CDX2*,NONO,TFEB*,FOXJ2,ASCL1*,POU3F2*,SMAR*CA2,RUNX2*,AR*,NCOR1,LMX1A*,OTX2*	10	0.67	AR: P10275_p_1_1, TFEB: P19484_p_1_1, TBP: P20226_p_1_1, POU3F2: P20265_p_2_1, OTX2: P32243_p_1_1, ASCL1: P50553_p_2_1, RUNX2: Q13950_p_1_1, LMX1A: Q8TE12_p_1_1, ZNF384: Q8TF68_p_3_1, CDX2: Q99626_p_2_1
PolyQ	GO:0046966	thyroid hormone receptor binding (GO:0046966)	4/28	1.78132e-05	0.000630588	30.3716	332.13	MED12,NCOR1,NCOA6*,NCOA3*	2	0.5	NCOA6: Q14686_p_1_1; Q14686_p_2_1, NCOA3: Q9Y6Q9_p_1_1
PolyQ	GO:0003723	RNA binding (GO:0003723)	21/1406	3.56584e-05	0.00105192	3.0493	31.2295	NUFIP2,NONO,CELF3*,TCF20,ZFP36L2*,GIGYF2*,PRRC2B*,SCAF4,CHERP*,PUM2,PURA*,ATXN2*,HNRNPDL*,DHX29*,TNRC6A,TNS1,SF1,DCP1B,ABCF1*,TNRC6B*,R3HDM2	11	0.52	HNRNPDL: O14979_p_2_1, ZFP36L2: P47974_p_2_1, PURA: Q00577_p_3_1, PRRC2B: Q5JSZ5_p_1_1, CELF3: Q5SZQ8_p_1_1, GIGYF2: Q6Y7W6_p_2_1; Q6Y7W6_p_3_1, DHX29: Q7Z478_p_2_1, CHERP: Q8IWX8_p_1_1, ABCF1: Q8NE71_p_1_1, ATXN2: Q99700_p_1_1, TNRC6B: Q9UPQ9_p_3_1
PolyQ	GO:0043565	sequence-specific DNA binding (GO:0043565)	14/707	4.52414e-05	0.00114396	3.91674	39.1811	MEF2A,NFAT5,ZNF384*,CDX2*,SATB1*,TFEB*,CXXC1,FOXJ2,ASCL1*,POU3F2*,RUNX2*,LMX1A*,HLX,OTX2*	9	0.64	TFEB: P19484_p_1_1, POU3F2: P20265_p_2_1, OTX2: P32243_p_1_1, ASCL1: P50553_p_2_1, SATB1: Q01826_p_1_1, RUNX2: Q13950_p_1_1, LMX1A: Q8TE12_p_1_1, ZNF384: Q8TF68_p_3_1, CDX2: Q99626_p_2_1
PolyQ	GO:0000976	transcription cis-regulatory region binding (GO:0000976)	12/549	6.46529e-05	0.00143045	4.28121	41.2986	MEF2A,AR*,PURA*,TBP*,NCOR1,LMX1A*,CDX2*,SATB1*,NONO,TFEB*,ASCL1*,SMAR*CA2	8	0.67	AR: P10275_p_1_1, TFEB: P19484_p_1_1, TBP: P20226_p_1_1, ASCL1: P50553_p_2_1, PURA: Q00577_p_3_1, SATB1: Q01826_p_1_1, LMX1A: Q8TE12_p_1_1, CDX2: Q99626_p_2_1
PolyQ	GO:0003677	DNA binding (GO:0003677)	14/811	0.000192634	0.00378847	3.3872	28.9765	MEF2A,CREBBP*,SATB1*,ARID3B*,ARID1A,POU3F2*,SMARCA2,THAP11*,PURA*,HLX,EP300,QRICH1,TP63*,POLG	7	0.5	POU3F2: P20265_p_2_1, PURA: Q00577_p_3_1, SATB1: Q01826_p_1_1, ARID3B: Q8IVW6_p_1_1, CREBBP: Q92793_p_1_1, THAP11: Q96EK4_p_1_1, TP63: Q9H3D4_p_1_1
PolyQ	GO:0001091	RNA polymerase II general transcription initiation factor binding (GO:0001091)	2/5	0.000312908	0.00507044	119.423	963.699	AR*,TBP*	2	1	AR: P10275_p_1_1, TBP: P20226_p_1_1
PolyQ	GO:0003690	double-stranded DNA binding (GO:0003690)	12/651	0.000315112	0.00507044	3.57886	28.8548	NFAT5,PURA*,ZNF384*,LMX1A*,CDX2*,SATB1*,TFEB*,FOXJ2,OTX2*,ASCL1*,POU3F2*,RUNX2*	10	0.83	TFEB: P19484_p_1_1, POU3F2: P20265_p_2_1, OTX2: P32243_p_1_1, ASCL1: P50553_p_2_1, PURA: Q00577_p_3_1, SATB1: Q01826_p_1_1, RUNX2: Q13950_p_1_1, LMX1A: Q8TE12_p_1_1, ZNF384: Q8TF68_p_3_1, CDX2: Q99626_p_2_1
PolyQ	GO:0000977	RNA polymerase II transcription regulatory region sequence-specific DNA binding (GO:0000977)	18/1359	0.00059715	0.00880797	2.62042	19.4522	MEF2A,NFAT5,ZNF384*,TBP*,CDX2*,SATB1*,POU6F2*,TFEB*,FOXJ2,ASCL1*,POU3F2*,RUNX2*,THAP11*,AR*,PURA*,LMX1A*,OTX2*,TP63*	15	0.83	AR: P10275_p_1_1, TFEB: P19484_p_1_1, TBP: P20226_p_1_1, POU3F2: P20265_p_2_1, OTX2: P32243_p_1_1, ASCL1: P50553_p_2_1, POU6F2: P78424_p_1_1, PURA: Q00577_p_3_1, SATB1: Q01826_p_1_1, RUNX2: Q13950_p_1_1, LMX1A: Q8TE12_p_1_1, ZNF384: Q8TF68_p_3_1, THAP11: Q96EK4_p_1_1, CDX2: Q99626_p_2_1, TP63: Q9H3D4_p_1_1
PolyQ	GO:0004402	histone acetyltransferase activity (GO:0004402)	3/31	0.000703401	0.00957707	19.3432	140.423	CREBBP*,NCOA3*,EP300	2	0.67	CREBBP: Q92793_p_1_1, NCOA3: Q9Y6Q9_p_1_1
PolyQ	GO:0001099	basal RNA polymerase II transcription machinery binding (GO:0001099)	3/33	0.000846802	0.00958538	18.0518	127.699	AR*,TBP*,NCOA3*	3	1	AR: P10275_p_1_1, TBP: P20226_p_1_1, NCOA3: Q9Y6Q9_p_1_1
PolyQ	GO:0099122	RNA polymerase II C-terminal domain binding (GO:0099122)	2/8	0.000866475	0.00958538	59.7027	420.968	SCAF4,BRD4*	1	0.5	BRD4: O60885_p_5_1
PolyQ	GO:0034046	poly(G) binding (GO:0034046)	2/8	0.000866475	0.00958538	59.7027	420.968	ATXN1*,HNRNPDL*	2	1	HNRNPDL: O14979_p_2_1, ATXN1: P54253_p_1_1; P54253_p_2_1
PolyQ	GO:0001067	transcription regulatory region nucleic acid binding (GO:0001067)	6/212	0.00130277	0.0135642	5.35732	35.59	AR*,TBP*,NCOR1,NONO,TFEB*,SMAR*CA2	3	0.5	AR: P10275_p_1_1, TFEB: P19484_p_1_1, TBP: P20226_p_1_1
PolyQ	GO:0045159	myosin II binding (GO:0045159)	2/11	0.00168324	0.0165519	39.7958	254.177	STXBP5,SHROOM4*	1	0.5	SHROOM4: Q9ULL8_p_1_1
PolyQ	GO:0000978	RNA polymerase II cis-regulatory region sequence-specific DNA binding (GO:0000978)	15/1149	0.00203725	0.0180296	2.53118	15.6836	MEF2A,NFAT5,ZNF384*,CDX2*,SATB1*,POU6F2*,TFEB*,FOXJ2,ASCL1*,POU3F2*,RUNX2*,THAP11*,AR*,OTX2*,TP63*	12	0.8	AR: P10275_p_1_1, TFEB: P19484_p_1_1, POU3F2: P20265_p_2_1, OTX2: P32243_p_1_1, ASCL1: P50553_p_2_1, POU6F2: P78424_p_1_1, SATB1: Q01826_p_1_1, RUNX2: Q13950_p_1_1, ZNF384: Q8TF68_p_3_1, THAP11: Q96EK4_p_1_1, CDX2: Q99626_p_2_1, TP63: Q9H3D4_p_1_1
PolyQ	GO:0000987	cis-regulatory region sequence-specific DNA binding (GO:0000987)	15/1149	0.00203725	0.0180296	2.53118	15.6836	MEF2A,NFAT5,ZNF384*,CDX2*,SATB1*,POU6F2*,TFEB*,FOXJ2,ASCL1*,POU3F2*,RUNX2*,THAP11*,AR*,OTX2*,TP63*	12	0.8	AR: P10275_p_1_1, TFEB: P19484_p_1_1, POU3F2: P20265_p_2_1, OTX2: P32243_p_1_1, ASCL1: P50553_p_2_1, POU6F2: P78424_p_1_1, SATB1: Q01826_p_1_1, RUNX2: Q13950_p_1_1, ZNF384: Q8TF68_p_3_1, THAP11: Q96EK4_p_1_1, CDX2: Q99626_p_2_1, TP63: Q9H3D4_p_1_1
PolyQ	GO:1990380	Lys48-specific deubiquitinase activity (GO:1990380)	2/15	0.00316639	0.0266881	27.5454	158.528	ATXN3*,USP7	1	0.5	ATXN3: P54252_p_1_1
PolyQ	GO:0030374	nuclear receptor coactivator activity (GO:0030374)	3/53	0.00335	0.0269523	10.8202	61.662	MED12,NCOA6*,NCOA3*	2	0.67	NCOA6: Q14686_p_1_1; Q14686_p_2_1, NCOA3: Q9Y6Q9_p_1_1
PolyQ	GO:0140034	methylation-dependent protein binding (GO:0140034)	3/63	0.00545185	0.0419555	9.01227	46.9702	ZMYND8*,CXXC1,CHD1*	2	0.67	CHD1: O14646_p_1_1, ZMYND8: Q9ULU4_p_1_1
PolyQ	GO:0140033	acetylation-dependent protein binding (GO:0140033)	2/21	0.0061944	0.0438564	18.8412	95.7905	ZMYND8*,BRD4*	2	1	BRD4: O60885_p_5_1, ZMYND8: Q9ULU4_p_1_1
PolyQ	GO:0070577	lysine-acetylated histone binding (GO:0070577)	2/21	0.0061944	0.0438564	18.8412	95.7905	ZMYND8*,BRD4*	2	1	BRD4: O60885_p_5_1, ZMYND8: Q9ULU4_p_1_1
PolyQ	GO:0035064	methylated histone binding (GO:0035064)	3/68	0.0067417	0.0445046	8.31692	41.58	ZMYND8*,CXXC1,CHD1*	2	0.67	CHD1: O14646_p_1_1, ZMYND8: Q9ULU4_p_1_1
PolyQ	GO:0043425	bHLH transcription factor binding (GO:0043425)	2/22	0.00678884	0.0445046	17.8982	89.3563	CREBBP*,ASCL1*	2	1	ASCL1: P50553_p_2_1, CREBBP: Q92793_p_1_1
PolyA	GO:0000976	transcription cis-regulatory region binding (GO:0000976)	15/549	3.40387e-08	4.42504e-06	6.97674	119.97	RB1,CASZ1,ZNF395*,FOXF2,ARX*,FOXK2,SOX12,ASCL1*,PHOX2B*,RXRB*,DACH1,NCOR1,HAND1,SP3,ZNF335	5	0.33	RXRB: P28702_p_1_1, ASCL1: P50553_p_1_1, ARX: Q96QS3_p_3_1, PHOX2B: Q99453_p_1_1; Q99453_p_3_1, ZNF395: Q9H8N7_p_1_1
PolyA	GO:0043565	sequence-specific DNA binding (GO:0043565)	13/707	2.31577e-05	0.000810007	4.49872	48.0157	KDM1A*,FOXF2,SRF,ARX*,GSX2,FOXK2,SOX12,ASCL1*,PHOX2B*,HOXA11,RXRB*,SP4,SP3	5	0.38	KDM1A: O60341_p_1_1, RXRB: P28702_p_1_1, ASCL1: P50553_p_1_1, ARX: Q96QS3_p_3_1, PHOX2B: Q99453_p_1_1; Q99453_p_3_1
PolyA	GO:0001228	DNA-binding transcription activator activity, RNA polymerase II-specific (GO:0001228)	9/333	2.48742e-05	0.000810007	6.47586	68.655	RXRB*,CASZ1,ZNF395*,FOXF2,SRF,HAND1,FOXK2,SOX12,PHOX2B*	3	0.33	RXRB: P28702_p_1_1, PHOX2B: Q99453_p_1_1; Q99453_p_3_1, ZNF395: Q9H8N7_p_1_1
PolyA	GO:1990837	sequence-specific double-stranded DNA binding (GO:1990837)	13/712	2.49233e-05	0.000810007	4.46538	47.3317	SRF,ARX*,GSX2,FOXK2,SOX12,ASCL1*,PHOX2B*,HOXA11,RXRB*,NCOR1,HAND1,SP3,ZNF335	4	0.31	RXRB: P28702_p_1_1, ASCL1: P50553_p_1_1, ARX: Q96QS3_p_3_1, PHOX2B: Q99453_p_1_1; Q99453_p_3_1
PolyA	GO:0070530	K63-linked polyubiquitin modification-dependent protein binding (GO:0070530)	3/22	0.000140585	0.0029262	34.8912	309.475	RNF169,MINDY2*,OTUD7A*	2	0.67	MINDY2: Q8NBR6_p_1_1, OTUD7A: Q8TE49_p_1_1
PolyA	GO:0043425	bHLH transcription factor binding (GO:0043425)	3/22	0.000140585	0.0029262	34.8912	309.475	KDM1A*,HAND1,ASCL1*	2	0.67	KDM1A: O60341_p_1_1, ASCL1: P50553_p_1_1
PolyA	GO:0000977	RNA polymerase II transcription regulatory region sequence-specific DNA binding (GO:0000977)	17/1359	0.000157565	0.0029262	3.09441	27.0936	RB1,CASZ1,ZNF395*,FOXF2,SRF,ARX*,FOXK2,SOX12,ASCL1*,PHOX2B*,HOXA11,RXRB*,DACH1,SP4,HAND1,SP3,ZNF335	5	0.29	RXRB: P28702_p_1_1, ASCL1: P50553_p_1_1, ARX: Q96QS3_p_3_1, PHOX2B: Q99453_p_1_1; Q99453_p_3_1, ZNF395: Q9H8N7_p_1_1
PolyA	GO:0003690	double-stranded DNA binding (GO:0003690)	11/651	0.000216229	0.00351372	4.03843	34.081	RXRB*,MSH3,SRF,ARX*,GSX2,SP3,SOX12,HDGFL1*,ASCL1*,PHOX2B*,HOXA11	5	0.45	RXRB: P28702_p_1_1, ASCL1: P50553_p_1_1, HDGFL1: Q5TGJ6_p_1_1, ARX: Q96QS3_p_3_1, PHOX2B: Q99453_p_1_1; Q99453_p_3_1
PolyA	GO:0140297	DNA-binding transcription factor binding (GO:0140297)	6/208	0.000423143	0.00611207	6.72755	52.2583	RB1,NCOR1,KDM1A*,SRF,HAND1,ASCL1*	2	0.33	KDM1A: O60341_p_1_1, ASCL1: P50553_p_1_1
PolyA	GO:0000978	RNA polymerase II cis-regulatory region sequence-specific DNA binding (GO:0000978)	14/1149	0.000829829	0.00980707	2.931	20.7934	ZNF395*,FOXF2,SRF,FOXK2,SOX12,ASCL1*,PHOX2B*,HOXA11,RXRB*,DACH1,SP4,HAND1,SP3,ZNF335	4	0.29	RXRB: P28702_p_1_1, ASCL1: P50553_p_1_1, PHOX2B: Q99453_p_1_1; Q99453_p_3_1, ZNF395: Q9H8N7_p_1_1
PolyA	GO:0000987	cis-regulatory region sequence-specific DNA binding (GO:0000987)	14/1149	0.000829829	0.00980707	2.931	20.7934	ZNF395*,FOXF2,SRF,FOXK2,SOX12,ASCL1*,PHOX2B*,HOXA11,RXRB*,DACH1,SP4,HAND1,SP3,ZNF335	4	0.29	RXRB: P28702_p_1_1, ASCL1: P50553_p_1_1, PHOX2B: Q99453_p_1_1; Q99453_p_3_1, ZNF395: Q9H8N7_p_1_1
PolyA	GO:0003743	translation initiation factor activity (GO:0003743)	3/41	0.000912909	0.00988985	17.4289	121.983	EIF4E3,EIF3J,EIF3F	0	0
PolyA	GO:0031593	polyubiquitin modification-dependent protein binding (GO:0031593)	3/51	0.00172461	0.0172461	13.791	87.7485	RNF169,MINDY2*,OTUD7A*	2	0.67	MINDY2: Q8NBR6_p_1_1, OTUD7A: Q8TE49_p_1_1
PolyA	GO:0004438	phosphatidylinositol-3-phosphatase activity (GO:0004438)	2/15	0.00215921	0.0200498	33.6331	206.441	MTMR1,MTMR14	0	0
PolyA	GO:0052744	phosphatidylinositol monophosphate phosphatase activity (GO:0052744)	2/17	0.00277984	0.0240919	29.1458	171.534	MTMR1,MTMR14	0	0
PolyA	GO:0001067	transcription regulatory region nucleic acid binding (GO:0001067)	5/212	0.00311826	0.0253359	5.40733	31.2029	NCOR1,HAND1,FOXK2,SOX12,ZNF335	0	0
PolyK	GO:0003723	RNA binding (GO:0003723)	26/1406	9.87598e-11	1.12586e-08	5.81986	134.08	USP36,GPATCH4,ZCCHC17,MTDH,SRP72,TCOF1,RBMX2,RBBP6,SRRM3,DDX18,SRRM4,HSP90AA1,NOP58,KNOP1,LARP7,ZCRB1,PA2G4*,GTF2F1,EIF2S2,SRRM1,FAM133B,SON,DKC1,RP9*,POLR1G,METAP2	2	0.08	RP9: Q8TA86_p_2_1; Q8TA86_p_3_1, PA2G4: Q9UQ80_p_1_1
PolyK	GO:0030911	TPR domain binding (GO:0030911)	2/5	0.000181222	0.0103297	158.024	1361.5	HSP90AA1,SRP72	0	0
PolyH	GO:0043565	sequence-specific DNA binding (GO:0043565)	20/707	3.72618e-15	3.01821e-13	14.7514	490.091	DLX2,ONECUT2,FOXF2,ZNF281,FOXG1,ONECUT1,GSX2,GATA6,MEOX2,POU3F1,MAFA,POU4F1,POU3F3,YY1,MECP2,MAF,MAFB,ZIC3,HOXA1,OTX1	0	0
PolyH	GO:0003690	double-stranded DNA binding (GO:0003690)	17/651	2.39447e-12	9.69762e-11	12.6274	337.882	DLX2,ONECUT2,ZNF281,FOXG1,ONECUT1,GSX2,GATA6,MEOX2,POU3F1,MAFA,POU4F1,YY1,MECP2,MAF,ZIC3,HOXA1,OTX1	0	0
PolyH	GO:1990837	sequence-specific double-stranded DNA binding (GO:1990837)	17/712	9.89903e-12	2.67274e-10	11.4827	290.955	DLX2,ONECUT2,ZNF281,FOXG1,ONECUT1,GSX2,GATA6,MEOX2,POU3F1,MAFA,POU4F1,YY1,MAF,ZIC3,HOXA1,OTX1,TAF2	0	0
PolyH	GO:0000978	RNA polymerase II cis-regulatory region sequence-specific DNA binding (GO:0000978)	20/1149	2.96988e-11	4.81121e-10	8.77022	212.589	FOXB2,DLX2,ONECUT2,FOXF2,ZNF281,ONECUT1,GATA6,MEOX2,POU3F1,MAFA,POU4F1,POU3F3,POU4F2,YY1,MAF,NR4A3,MAFB,ZIC3,HOXA1,OTX1	0	0
PolyH	GO:0000987	cis-regulatory region sequence-specific DNA binding (GO:0000987)	20/1149	2.96988e-11	4.81121e-10	8.77022	212.589	FOXB2,DLX2,ONECUT2,FOXF2,ZNF281,ONECUT1,GATA6,MEOX2,POU3F1,MAFA,POU4F1,POU3F3,POU4F2,YY1,MAF,NR4A3,MAFB,ZIC3,HOXA1,OTX1	0	0
PolyH	GO:0000977	RNA polymerase II transcription regulatory region sequence-specific DNA binding (GO:0000977)	21/1359	7.54371e-11	1.0184e-09	7.89165	183.936	FOXB2,GTF2A1,DLX2,ONECUT2,FOXF2,ZNF281,ONECUT1,GATA6,MEOX2,POU3F1,MAFA,POU4F1,POU3F3,POU4F2,YY1,MAF,NR4A3,MAFB,ZIC3,HOXA1,OTX1	0	0
PolyH	GO:0003677	DNA binding (GO:0003677)	16/811	7.47983e-10	8.65523e-09	9.17496	192.799	GTF2A1,FOXF2,CHD8,ZNF281,FOXG1,MEOX2,POU3F1,MAFA,POU4F1,POU3F3,YY1,MECP2,NR4A3,MAFB,ZIC3,HOXA1	0	0
PolyH	GO:0001228	DNA-binding transcription activator activity, RNA polymerase II-specific (GO:0001228)	11/333	2.61999e-09	2.65274e-08	14.2606	281.791	YY1,NR4A3,ONECUT2,FOXF2,ZIC3,ONECUT1,HOXA1,OTX1,MEOX2,POU4F1,POU4F2	0	0
PolyH	GO:0032183	SUMO binding (GO:0032183)	2/13	0.000631582	0.00568424	64.711	476.745	CBX4,RNF111	0	0
PolyH	GO:0004674	protein serine/threonine kinase activity (GO:0004674)	5/344	0.00317722	0.0245141	5.45528	31.3774	PLK2,DYRK1A,BMP2K*,NLK,BRD4	1	0.2	BMP2K: Q9NSY1_p_2_1
PolyH	GO:0001067	transcription regulatory region nucleic acid binding (GO:0001067)	4/212	0.00332908	0.0245141	7.02778	40.0939	YY1,ZNF281,GATA6,TAF2	0	0
PolyH	GO:0005245	voltage-gated calcium channel activity (GO:0005245)	2/37	0.00515733	0.034812	20.3133	106.997	CACNA1A,CACNA1H	0	0

## Sheet: CC
poly type	GO id	GO term	Overlap	p-value	adj p-value	odds ratio	combined score	enriched genes	count genes helix	fraction genes helix	enriched genes helix
PolyP	GO:0005634	nucleus (GO:0005634)	133/4484	1.48258e-11	2.22387e-09	2.17542	54.2434	RB1,CCNK,DGKD,PRAG1,IRS1,CRTC1,PRDM6,CTNND2,ATN1,SCX,CASC3,SALL2,PWWP2A,PITX1,DDX17,HES7,TSPYL2,SMARCC1,POU3F1,FBXO11,POU3F3,RSBN1,HNRNPUL1,KAT6A,MAPKAPK2,HOXB4,ERF,HOXB2,SIK2,ZFPM1,PRR11,SF1,KMT2E,KHDRBS2,KHDRBS3,NOTCH1,TNKS,FOXG1,MAZ,BAG6,STRIP1,STIP1,NEUROD2,VCPIP1,ZNF827,SMN1,NKX2-4,BCL9L,SRPK2,EGR2,F8A1,MYPOP,SETD1A,SMARCA5,MICAL3,MEX3D,TRERF1,NFATC4,ACR,HNRNPL,DIAPH1,EIF5,HNRNPK,DIAPH3,JMY,…	0	0
PolyP	GO:0043231	intracellular membrane-bounded organelle (GO:0043231)	141/5192	1.64452e-09	1.23339e-07	1.96904	39.8254	RB1,CCNK,DGKD,PRAG1,IRS1,CRTC1,PRDM6,CTNND2,ATN1,SCX,CASC3,SALL2,PWWP2A,WASHC1,PITX1,DDX17,HES7,TSPYL2,SMARCC1,FNBP1,RFX1,POU3F1,FBXO11,POU3F3,RSBN1,HNRNPUL1,KAT6A,MAPKAPK2,HOXB4,ERF,HOXB2,SIK2,ZFPM1,PRR11,SF1,KMT2E,KHDRBS2,KHDRBS3,NOTCH1,TNKS,FOXG1,MAZ,BAG6,STRIP1,STIP1,NEUROD2,VCPIP1,ZNF827,SMN1,NKX2-4,BCL9L,SRPK2,EGR2,F8A1,MYPOP,SETD1A,EAF1,SMARCA5,MICAL3,MEX3D,TRERF1,NFATC4,ACR,HNRNPL,DIAPH1,…	0	0
PolyP	GO:0015629	actin cytoskeleton (GO:0015629)	23/316	8.60848e-09	4.30424e-07	4.67584	86.8328	NOTCH3,WIPF1,WIPF2,WIPF3,RDX,KLHL17,WAS,LMOD1,SHROOM2,COBL,SHROOM3,ASAP1,FMN2,WASL,SRCIN1,LMOD2,PPP1R9B,ARHGAP32,PALLD,ZYX,WASF1,WASF2,DBN1	0	0
PolyP	GO:0005884	actin filament (GO:0005884)	10/72	4.60406e-07	1.72652e-05	9.34816	136.4	WIPF1,PALLD,WIPF2,WIPF3,LMOD1,WAS,COBL,WASL,DBN1,LMOD2	0	0
PolyP	GO:0016514	SWI/SNF complex (GO:0016514)	5/19	1.47428e-05	0.000442284	20.4477	227.476	RB1,SMARCC1,SMARCC2,ARID1A,BICRA	0	0
PolyP	GO:0008024	cyclin/CDK positive transcription elongation factor complex (GO:0008024)	3/6	0.000100466	0.00251164	56.9536	524.298	CCNK,CDK12,CDK13	0	0
PolyP	GO:0071564	npBAF complex (GO:0071564)	3/11	0.000776814	0.0145692	21.3522	152.888	SMARCC1,SMARCC2,ARID1A	0	0
PolyP	GO:0030864	cortical actin cytoskeleton (GO:0030864)	5/42	0.000777024	0.0145692	7.72792	55.3322	RDX,SHROOM2,COBL,SHROOM3,DBN1	0	0
PolyP	GO:0005856	cytoskeleton (GO:0005856)	22/600	0.000880492	0.0146749	2.22699	15.667	FHOD3,NOTCH3,CENPV,WIPF1,KLHL17,WAS,LMOD1,SHROOM2,SHROOM3,WASL,FMN2,SRCIN1,SYN1,LMOD2,PPP1R9B,SHTN1,ARHGAP32,PALLD,ZYX,WASF1,WASF2,DBN1	0	0
PolyP	GO:0071565	nBAF complex (GO:0071565)	3/14	0.00164853	0.024728	15.5265	99.4917	SMARCC1,SMARCC2,ARID1A	0	0
PolyE	GO:0005634	nucleus (GO:0005634)	145/4484	1.84591e-13	3.78412e-11	2.27108	66.5894	MYT1L*,EHMT2*,WWC1,POGK*,HNRNPU,DCAF8*,PRDM2,ARID4B,ZBTB22,GPATCH8,FERD3L,ZNF608,PPP4R2,CCND1,SALL2,CWC22,BBX,SNIP1*,PIAS4,DAXX,LIG1,APLP2,MAGI2,ZBTB33,PUS7,MYT1*,CLIP3,HNRNPUL2*,KAT6B,GRWD1,NCL,KAT6A*,RRAGD,TIMELESS*,ZNF316,TNIK,RAD54L2*,ZNF830,HOXB7,HOMEZ,PAXIP1*,YTHDC1*,TSHZ2,PDS5B,ZBTB4,TTBK1*,HSP90B1,AK9*,NEUROD1,NEUROD2,NEUROD4,WDR70*,MIER1,CLSPN,RBM10*,PPARGC1B*,PRPF38A*,ZFHX2,BCL11B*,BCL1…	43	0.3	ZFC3H1: O60293_p_3_1, TRH: P20396_p_3_1, DEK: P35659_p_1_1, IRX6: P78412_p_2_1, RBM10: P98175_p_2_1, MYT1: Q01538_p_1_1; Q01538_p_2_1, PDE4C: Q08493_p_1_1, SF3A3: Q12874_p_1_1, IRF5: Q13568_p_1_1, HNRNPUL2: Q1KMD3_p_1_1, NCBP3: Q53F19_p_1_1, DCAF8: Q5TAQ9_p_1_1, AK9: Q5TCS8_p_1_1, TTBK1: Q5TCY1_p_1_1; Q5TCY1_p_2_1; Q5TCY1_p_3_1, TAF3: Q5VWG9_p_1_1, PAXIP1: Q6ZW49_p_1_1, NPM2: Q86SE8_p_1_1; Q86SE8…
PolyE	GO:0043231	intracellular membrane-bounded organelle (GO:0043231)	159/5192	6.02161e-13	6.17215e-11	2.1855	61.4962	SLC4A1AP,MYT1L*,EHMT2*,WWC1,POGK*,GOLIM4,HNRNPU,DCAF8*,PRDM2,ARID4B,ZBTB22,GPATCH8,FERD3L,GOLGA2,ZNF608,PPP4R2,CCND1,SALL2,CWC22,BBX,SNIP1*,PIAS4,DAXX,LIG1,APLP2,MAGI2,RFX1*,ZBTB33,PUS7,MYT1*,NISCH*,CLIP3,HNRNPUL2*,KAT6B,GRWD1,NCL,KAT6A*,RRAGD,TIMELESS*,ZNF316,TNIK,RAD54L2*,ZNF830,HOXB7,HOMEZ,PAXIP1*,AKNA,YTHDC1*,TSHZ2,PDS5B,ZBTB4,TTBK1*,HSP90B1,AK9*,NEUROD1,NEUROD2,NEUROD4,WDR70*,MIER1,CLSPN,B4G…	50	0.31	ZFC3H1: O60293_p_3_1, ADRA2B: P18089_p_1_1, TRH: P20396_p_3_1, RFX1: P22670_p_3_1, DEK: P35659_p_1_1, RANGAP1: P46060_p_2_1; P46060_p_3_1; P46060_p_4_1, IRX6: P78412_p_2_1, RBM10: P98175_p_2_1, MYT1: Q01538_p_1_1; Q01538_p_2_1, PDE4C: Q08493_p_1_1, SF3A3: Q12874_p_1_1, IRF5: Q13568_p_1_1, HNRNPUL2: Q1KMD3_p_1_1, NCBP3: Q53F19_p_1_1, AMER1: Q5JTC6_p_1_1; Q5JTC6_p_2_1, RRP12: Q5JTH9_p_1_1, DCAF8: Q…
PolyE	GO:0031981	nuclear lumen (GO:0031981)	38/745	1.73652e-08	1.18662e-06	3.06349	54.7408	HOMEZ,ZNF771,MAPKBP1,GTF3C3,DDX24,NOP2,HMGB2,HNRNPU,NOLC1,KRI1,RRP8,RRP9,SNAPC5,PES1*,DHX37,RRP12*,PELP1*,NOP58,NPM2*,UTP3,RBM19*,ZFC3H1*,ZFP91,NOC3L*,ZBTB33,SENP3,SMARCA4,FTSJ3*,ZEB2,WEE1,GRWD1,NCL,KAT6A*,TAOK2,TERF2IP,HAP1*,ERCC6,GZF1	10	0.26	PES1: O00541_p_1_1, ZFC3H1: O60293_p_3_1, HAP1: P54257_p_1_1, RRP12: Q5JTH9_p_1_1, NPM2: Q86SE8_p_1_1; Q86SE8_p_2_1, FTSJ3: Q8IY81_p_1_1, PELP1: Q8IZL8_p_2_1; Q8IZL8_p_3_1; Q8IZL8_p_4_1; Q8IZL8_p_5_1, NOC3L: Q8WTT2_p_1_1, KAT6A: Q92794_p_1_1, RBM19: Q9Y4C8_p_1_1
PolyE	GO:0005730	nucleolus (GO:0005730)	36/733	1.08278e-07	5.54926e-06	2.92781	46.9578	HOMEZ,ZNF771,MAPKBP1,GTF3C3,DDX24,NOP2,HMGB2,NOLC1,KRI1,RRP8,RRP9,SNAPC5,PES1*,DHX37,RRP12*,PELP1*,NOP58,NPM2*,UTP3,RBM19*,ZFC3H1*,ZFP91,NOC3L*,ZBTB33,SENP3,SMARCA4,FTSJ3*,ZEB2,WEE1,GRWD1,NCL,KAT6A*,TAOK2,HAP1*,ERCC6,GZF1	10	0.28	PES1: O00541_p_1_1, ZFC3H1: O60293_p_3_1, HAP1: P54257_p_1_1, RRP12: Q5JTH9_p_1_1, NPM2: Q86SE8_p_1_1; Q86SE8_p_2_1, FTSJ3: Q8IY81_p_1_1, PELP1: Q8IZL8_p_2_1; Q8IZL8_p_3_1; Q8IZL8_p_4_1; Q8IZL8_p_5_1, NOC3L: Q8WTT2_p_1_1, KAT6A: Q92794_p_1_1, RBM19: Q9Y4C8_p_1_1
PolyE	GO:0071005	U2-type precatalytic spliceosome (GO:0071005)	8/50	3.46565e-06	0.000142092	10.3068	129.583	SF3A3*,SF3B2,PRPF38A*,MFAP1,CWC22,DHX16,SNIP1*,CWC27*	4	0.5	SF3A3: Q12874_p_1_1, CWC27: Q6UX04_p_1_1, PRPF38A: Q8NAV1_p_1_1, SNIP1: Q8TAD8_p_1_1
PolyE	GO:0071011	precatalytic spliceosome (GO:0071011)	8/52	4.7038e-06	0.000160713	9.83727	120.675	SF3A3*,SF3B2,PRPF38A*,MFAP1,CWC22,DHX16,SNIP1*,CWC27*	4	0.5	SF3A3: Q12874_p_1_1, CWC27: Q6UX04_p_1_1, PRPF38A: Q8NAV1_p_1_1, SNIP1: Q8TAD8_p_1_1
PolyE	GO:0043232	intracellular non-membrane-bounded organelle (GO:0043232)	42/1158	2.41978e-05	0.000708649	2.12428	22.5795	HOMEZ,ZNF771,MAPKBP1,GTF3C3,CTDP1,DDX24,NOP2,HMGB2,NOLC1,PDS5B,KRI1,RRP8,CENPB,RRP9,LMOD2,SNAPC5,CALD1*,PES1*,DHX37,RRP12*,PELP1*,NOP58,NPM2*,UTP3,RBM19*,ZFC3H1*,ZFP91,NOC3L*,ZBTB33,SENP3,SMARCA4,FTSJ3*,ZEB2,WEE1,GRWD1,NCL,KAT6A*,TAOK2,HAP1*,TNIK,ERCC6,GZF1	11	0.26	PES1: O00541_p_1_1, ZFC3H1: O60293_p_3_1, HAP1: P54257_p_1_1, CALD1: Q05682_p_1_1, RRP12: Q5JTH9_p_1_1, NPM2: Q86SE8_p_1_1; Q86SE8_p_2_1, FTSJ3: Q8IY81_p_1_1, PELP1: Q8IZL8_p_2_1; Q8IZL8_p_3_1; Q8IZL8_p_4_1; Q8IZL8_p_5_1, NOC3L: Q8WTT2_p_1_1, KAT6A: Q92794_p_1_1, RBM19: Q9Y4C8_p_1_1
PolyE	GO:0005684	U2-type spliceosomal complex (GO:0005684)	9/89	3.9779e-05	0.00101934	6.09245	61.7298	ISY1,SF3A3*,SF3B2,PRPF38A*,MFAP1,CWC22,DHX16,SNIP1*,CWC27*	4	0.44	SF3A3: Q12874_p_1_1, CWC27: Q6UX04_p_1_1, PRPF38A: Q8NAV1_p_1_1, SNIP1: Q8TAD8_p_1_1
PolyE	GO:0070776	MOZ/MORF histone acetyltransferase complex (GO:0070776)	3/8	0.000328233	0.00747642	32.0845	257.375	BRPF3,KAT6B,KAT6A*	1	0.33	KAT6A: Q92794_p_1_1
PolyE	GO:0070775	H3 histone acetyltransferase complex (GO:0070775)	3/9	0.000485605	0.00995489	26.7357	203.996	BRPF3,KAT6B,KAT6A*	1	0.33	KAT6A: Q92794_p_1_1
PolyS	GO:0005634	nucleus (GO:0005634)	109/4484	9.91842e-17	1.16046e-14	3.11793	114.894	CRTC2,CCNT2,IRS1,ATN1,PRDM2,ARID4B,ZBTB22,EDC4,MEIOSIN,SALL1,DACH1,CIR1,DIP2B,SOX4,RNF111,MEF2A,MED1,SRRM4,UBE2E1,SOX11,TSC1,KRT76,MED4,EML3,JMJD6,SRRM1,RNF126,MSH4,ERF,PRKD2,PPIG,TNIK,HDGFL2,TSHZ3,TNKS,GATA6,XPC,BHLHE22*,HNRNPLL,ZBTB4,ZFP36L1,MBTD1,RAI1,ATXN7,BAG3,ZNF703,CAMTA2,NKX6-1,EGR1,BRPF1,FOXF2,CBX2,SETD1A,PCIF1,NR1D1,FOXN3,SPRTN,HOXD4,RNPS1,GTF2IRD1,TAB1,CDK13,NFE2L1,CSRNP1,ZC3H3,CHD8,ON…	2	0.02	TFE3: P19532_p_1_1, BHLHE22: Q8NFJ8_p_4_1
PolyS	GO:0043231	intracellular membrane-bounded organelle (GO:0043231)	114/5192	2.49324e-14	1.45855e-12	2.79481	87.5407	CRTC2,CCNT2,IRS1,ATN1,PRDM2,ARID4B,ZBTB22,EDC4,MEIOSIN,SALL1,DACH1,CIR1,DIP2B,SOX4,RNF111,MEF2A,MED1,SRRM4,UBE2E1,SOX11,TSC1,KRT76,MED4,EML3,JMJD6,SRRM1,RNF126,MSH4,ERF,PRKD2,PPIG,TNIK,HDGFL2,TSHZ3,TNKS,GATA6,XPC,BHLHE22*,HNRNPLL,ZBTB4,ZFP36L1,MBTD1,RAI1,ATXN7,BAG3,ZNF703,CAMTA2,NKX6-1,EGR1,BRPF1,FOXF2,CBX2,SETD1A,PCIF1,NR1D1,FOXN3,SPRTN,HOXD4,RNPS1,GTF2IRD1,TAB1,CDK13,NFE2L1,B4GALT2,CSRNP1,ZC3H3…	2	0.02	TFE3: P19532_p_1_1, BHLHE22: Q8NFJ8_p_4_1
PolyG	GO:0005634	nucleus (GO:0005634)	88/4484	5.28708e-14	5.49856e-12	3.14939	96.2799	PRDM8,CREBZF,GSK3A,ONECUT2,HNRNPU,FMN2,HOXA10,FBL,ZXDA,MED14,SOX1,DACH1,ZIC2,ZXDB,NKX1-2,ARIH1,SOX7,MNX1,SOX4,DDX17,FOXD1,REXO1,ZNF281,KRT1,FOXL2,POU3F1,ARID1A,POU3F3,KRT9,MN1,SFPQ,TAL1,HOXB3,ANKRD17,HDAC5,FOXC1,WDR26,CARNMT1,YTHDC2,SHOX2,MEPCE,SRSF1,LEF1,BHLHE22,MLLT6,BICRA,PURA,GBX1,TRA2B,DHX36,TRA2A,NKX2-1,SHOX,ZNF746,ZNF503,RALY,SRSF11,BCL9L,HNRNPA0,SUZ12,EGR1,ZNF384,SKOR1,TCF7L1,FOXF2,GSX1,F…	0	0
PolyG	GO:0043231	intracellular membrane-bounded organelle (GO:0043231)	89/5192	1.0086e-10	5.24472e-09	2.64506	60.882	PRDM8,CREBZF,GSK3A,ONECUT2,HNRNPU,FMN2,HOXA10,FBL,ZXDA,MED14,SOX1,DACH1,ZIC2,ZXDB,NKX1-2,ARIH1,SOX7,MNX1,SOX4,DDX17,FOXD1,REXO1,ZNF281,KRT1,FOXL2,RFX1,POU3F1,ARID1A,POU3F3,KRT9,MN1,SFPQ,TAL1,HOXB3,ANKRD17,HDAC5,FOXC1,WDR26,CARNMT1,YTHDC2,SHOX2,MEPCE,SRSF1,LEF1,BHLHE22,MLLT6,BICRA,PURA,GBX1,TRA2B,DHX36,TRA2A,NKX2-1,SHOX,ZNF746,ZNF503,RALY,SRSF11,BCL9L,HNRNPA0,SUZ12,EGR1,ZNF384,SKOR1,TCF7L1,FOXF2,G…	0	0
PolyG	GO:1990907	beta-catenin-TCF complex (GO:1990907)	3/13	0.000211337	0.00589633	32.4656	274.726	TCF7L1,LEF1,BCL9L	0	0
PolyG	GO:0030425	dendrite (GO:0030425)	10/270	0.000226782	0.00589633	4.27316	35.8584	GSK3A,SKOR1,DAGLA,HRH3,DHX36,MARK4,SRCIN1,STRN4,SHANK1,STRN3	0	0
PolyG	GO:0000932	P-body (GO:0000932)	5/80	0.000901691	0.0187552	7.27035	50.9742	TRIM71,MEX3B,MEX3A,CNOT3,WTIP	0	0
PolyG	GO:0031428	box C/D RNP complex (GO:0031428)	2/6	0.00125907	0.021824	53.8315	359.453	FBL,FBLL1	0	0
PolyG	GO:0035098	ESC/E(Z) complex (GO:0035098)	2/8	0.00232163	0.0344928	35.8841	217.654	SUZ12,AEBP2	0	0
PolyQ	GO:0005634	nucleus (GO:0005634)	59/4484	4.32262e-12	1.78452e-10	3.81778	99.9004	PRDM8,MAML2*,IRS1,ZMYND8*,CELF3*,ATN1*,TCF20,FMN2*,CHD1*,MED12,EP300,PHLDA1*,TP63*,MEF2A,USP7,TBP*,NCOA6*,NCOA3*,TFEB*,AR*ID1A,FBXO11,RUNX2*,NCOR2,AR*,MN1*,NCOR1,LMX1A*,BMP2K*,MAML3*,SF1,NFAT5,PAXIP1*,NUFIP2,SATB1*,CXXC1,CACNA1A,ASCL1*,PRDM10,TOB1,ZFP36L2*,ATXN3*,RAI1,PURA*,ATXN1*,ATXN7*,OTX2*,BRD4*,ZNF384*,CREBBP*,PHC1*,CDX2*,NONO,FOXJ2,RANBP9,ARID3B*,SMAR*CA2,PHC3,SCAF4,QRICH1	33	0.56	CHD1: O14646_p_1_1, ATXN7: O15265_p_2_1, BRD4: O60885_p_5_1, AR: P10275_p_1_1, TFEB: P19484_p_1_1, TBP: P20226_p_1_1, OTX2: P32243_p_1_1, ZFP36L2: P47974_p_2_1, ASCL1: P50553_p_2_1, ATXN3: P54252_p_1_1, ATXN1: P54253_p_1_1; P54253_p_2_1, ATN1: P54259_p_4_1, PHC1: P78364_p_1_1, PURA: Q00577_p_3_1, SATB1: Q01826_p_1_1, MN1: Q10571_p_2_1, RUNX2: Q13950_p_1_1, NCOA6: Q14686_p_1_1; Q14686_p_2_1, CELF3…
PolyQ	GO:0043231	intracellular membrane-bounded organelle (GO:0043231)	64/5192	4.40623e-12	1.78452e-10	3.75918	98.295	PRDM8,MAML2*,IRS1,ZMYND8*,CELF3*,ATN1*,TCF20,FMN2*,CHD1*,MED12,EP300,PHLDA1*,TP63*,MEF2A,USP7,TBP*,NCOA6*,NCOA3*,TFEB*,AR*ID1A,FBXO11,RUNX2*,SHROOM4*,NCOR2,AR*,MN1*,NCOR1,LMX1A*,TBC1D5,BMP2K*,MAML3*,SF1,NFAT5,PAXIP1*,PHLPP1,NUFIP2,SATB1*,CXXC1,CACNA1A,ASCL1*,PRDM10,TOB1,ZFP36L2*,ATXN3*,RAI1,PURA*,ATXN1*,ATXN7*,OTX2*,BRD4*,ZNF384*,CREBBP*,PHC1*,CDX2*,NONO,FOXJ2,RANBP9,ARID3B*,SMAR*CA2,PHC3,SCAF4,Q…	34	0.53	CHD1: O14646_p_1_1, ATXN7: O15265_p_2_1, BRD4: O60885_p_5_1, AR: P10275_p_1_1, TFEB: P19484_p_1_1, TBP: P20226_p_1_1, OTX2: P32243_p_1_1, ZFP36L2: P47974_p_2_1, ASCL1: P50553_p_2_1, ATXN3: P54252_p_1_1, ATXN1: P54253_p_1_1; P54253_p_2_1, ATN1: P54259_p_4_1, PHC1: P78364_p_1_1, PURA: Q00577_p_3_1, SATB1: Q01826_p_1_1, MN1: Q10571_p_2_1, RUNX2: Q13950_p_1_1, NCOA6: Q14686_p_1_1; Q14686_p_2_1, CELF3…
PolyQ	GO:0010494	cytoplasmic stress granule (GO:0010494)	4/65	0.000501589	0.0135429	11.9272	90.6197	ATXN2*,NUFIP2,GIGYF2*,PUM2	2	0.5	GIGYF2: Q6Y7W6_p_2_1; Q6Y7W6_p_3_1, ATXN2: Q99700_p_1_1
PolyQ	GO:0071564	npBAF complex (GO:0071564)	2/11	0.00168324	0.0272685	39.7958	254.177	ARID1A,SMARCA2	0	0
PolyQ	GO:0042405	nuclear inclusion body (GO:0042405)	2/11	0.00168324	0.0272685	39.7958	254.177	ATXN3*,ATXN1*	2	1	ATXN3: P54252_p_1_1, ATXN1: P54253_p_1_1; P54253_p_2_1
PolyQ	GO:0071565	nBAF complex (GO:0071565)	2/14	0.00275434	0.0366396	29.8423	175.908	ARID1A,SMARCA2	0	0
PolyQ	GO:0035102	PRC1 complex (GO:0035102)	2/15	0.00316639	0.0366396	27.5454	158.528	PHC1*,PHC3	1	0.5	PHC1: P78364_p_1_1
PolyA	GO:0005634	nucleus (GO:0005634)	39/4484	1.99144e-05	0.00127452	2.51226	27.1929	RB1,CASZ1,ZNF395*,KDM1A*,EHMT2,SRF,OTUD7A*,FOXK2,TCF20,ASCL1*,HOXA11,RXRB*,DACH1,PABPN1,ATXN7*,BAG3,KHSRP,RSBN1L,SAMD1,FOXF2,GSX2,ZFP91,WRNIP1,ARID1A,SRRM1,POLE4,NCOR1,RNF169,RGCC*,MSH3,HAND1,SP3,JMY,SRRD,CDK12*,HDGFL1*,ZNF335,ZNF653,DGKI	9	0.23	ATXN7: O15265_p_1_1, KDM1A: O60341_p_1_1, RXRB: P28702_p_1_1, ASCL1: P50553_p_1_1, HDGFL1: Q5TGJ6_p_1_1, OTUD7A: Q8TE49_p_1_1, RGCC: Q9H4X1_p_1_1, ZNF395: Q9H8N7_p_1_1, CDK12: Q9NYV4_p_1_1
PolyA	GO:0043231	intracellular membrane-bounded organelle (GO:0043231)	41/5192	0.000112902	0.00361288	2.2587	20.5292	RB1,CASZ1,ZNF395*,KDM1A*,EHMT2,SRF,OTUD7A*,FOXK2,TCF20,ASCL1*,HOXA11,RXRB*,ZNRF2,DACH1,PABPN1,VPS51,ATXN7*,BAG3,KHSRP,RSBN1L,SAMD1,FOXF2,GSX2,ZFP91,WRNIP1,ARID1A,SRRM1,POLE4,NCOR1,RNF169,RGCC*,MSH3,HAND1,SP3,JMY,SRRD,CDK12*,HDGFL1*,ZNF335,ZNF653,DGKI	9	0.22	ATXN7: O15265_p_1_1, KDM1A: O60341_p_1_1, RXRB: P28702_p_1_1, ASCL1: P50553_p_1_1, HDGFL1: Q5TGJ6_p_1_1, OTUD7A: Q8TE49_p_1_1, RGCC: Q9H4X1_p_1_1, ZNF395: Q9H8N7_p_1_1, CDK12: Q9NYV4_p_1_1
PolyK	GO:0005887	integral component of plasma membrane (GO:0005887)	18/1454	3.80197e-05	0.00258534	3.40615	34.6658	PCDHA13,SLC4A3,PCDHA12,SLC4A4*,PCDHA11,PCDHA10,TRPM1,PCDHA1,PCDHA5,PCDHA4,PCDHA3,PCDHA2,PCDHA9,PCDHA8,PCDHAC2,PCDHA7,PCDHAC1,PCDHA6	1	0.06	SLC4A4: Q9Y6R1_p_1_1
PolyK	GO:0005730	nucleolus (GO:0005730)	11/733	0.000298054	0.00857803	3.89865	31.6502	USP36,DDX18,NOP58,TCOF1,DKC1,POLR1F,POLR1G,PA2G4*,TTF1,MPHOSPH8,SMARCA4*	2	0.18	SMARCA4: P51532_p_1_1, PA2G4: Q9UQ80_p_1_1
PolyK	GO:0044545	NSL complex (GO:0044545)	2/7	0.000378443	0.00857803	94.8048	747.009	PHF20L1,PHF20	0	0
PolyK	GO:0031981	nuclear lumen (GO:0031981)	10/745	0.00133337	0.0187987	3.4334	22.7293	USP36,DDX18,NOP58,TCOF1,DKC1,POLR1G,PA2G4*,TTF1,MPHOSPH8,SMARCA4*	2	0.2	SMARCA4: P51532_p_1_1, PA2G4: Q9UQ80_p_1_1
PolyK	GO:0005736	RNA polymerase I complex (GO:0005736)	2/13	0.00138226	0.0187987	43.0801	283.641	POLR1F,POLR1G	0	0
PolyK	GO:0005634	nucleus (GO:0005634)	31/4484	0.00278345	0.0289486	1.95697	11.5149	USP36,CHD5,TTF1,NKAPL,MTDH,RBMX2,RSBN1L,BBX,CIR1*,BRD9*,SRRM4,HSP90AA1,CDKL5,USP42,LARP7,PA2G4*,GTF2F1,EIF2S2,TOPORS,SRRM1,SMARCA4*,TOX3,TOX2,DKC1,PKP4,TOX,EAPP,SLU7*,MPHOSPH8,FERMT2,RABL6	5	0.16	SLU7: O95391_p_1_1, SMARCA4: P51532_p_1_1, CIR1: Q86X95_p_1_1, BRD9: Q9H8M2_p_1_1, PA2G4: Q9UQ80_p_1_1
PolyK	GO:0016514	SWI/SNF complex (GO:0016514)	2/19	0.00298	0.0289486	27.8669	162.069	BRD9*,SMARCA4*	2	1	SMARCA4: P51532_p_1_1, BRD9: Q9H8M2_p_1_1
PolyK	GO:1902562	H4 histone acetyltransferase complex (GO:1902562)	2/25	0.00514139	0.0437019	20.5911	108.524	PHF20L1,PHF20	0	0
PolyH	GO:0005634	nucleus (GO:0005634)	35/4484	5.47606e-10	2.35471e-08	5.29924	113.009	ONECUT2,NUFIP2,TNKS,CHD8,FOXG1,ONECUT1,GATA6,CACNA1A,PRDM13,MEOX2,NLK,YY1,MECP2,RBM15B,ZIC3,HOXA1,OTX1,RNF111,BRD4,CBX4,FOXF2,ZNF281,PLK2,GSX2,DYRK1A,POU3F1,MAFA,POU4F1,POU3F3,POU4F2,MAF,NR4A3,MAFB,BMP2K*,VGLL3	1	0.03	BMP2K: Q9NSY1_p_2_1
PolyH	GO:0043231	intracellular membrane-bounded organelle (GO:0043231)	36/5192	7.38369e-09	1.58749e-07	4.69264	87.865	ONECUT2,NUFIP2,TNKS,CHD8,FOXG1,ONECUT1,GATA6,CACNA1A,PRDM13,MEOX2,NLK,RHOBTB2,YY1,MECP2,RBM15B,ZIC3,HOXA1,OTX1,RNF111,BRD4,CBX4,FOXF2,ZNF281,PLK2,GSX2,DYRK1A,POU3F1,MAFA,POU4F1,POU3F3,POU4F2,MAF,NR4A3,MAFB,BMP2K*,VGLL3	1	0.03	BMP2K: Q9NSY1_p_2_1
